# Supplementary material for: Assessing inflammatory protein factors in inflammatory bowel Disease using multivariable mendelian randomization
Source: PubMed Central journal article supplement — Sci Rep. 2025 Jan 2;15:210. doi: 10.1038/s41598-024-84447-4 (PMC11696058; doi:10.1038/s41598-024-84447-4), 2025-01-02

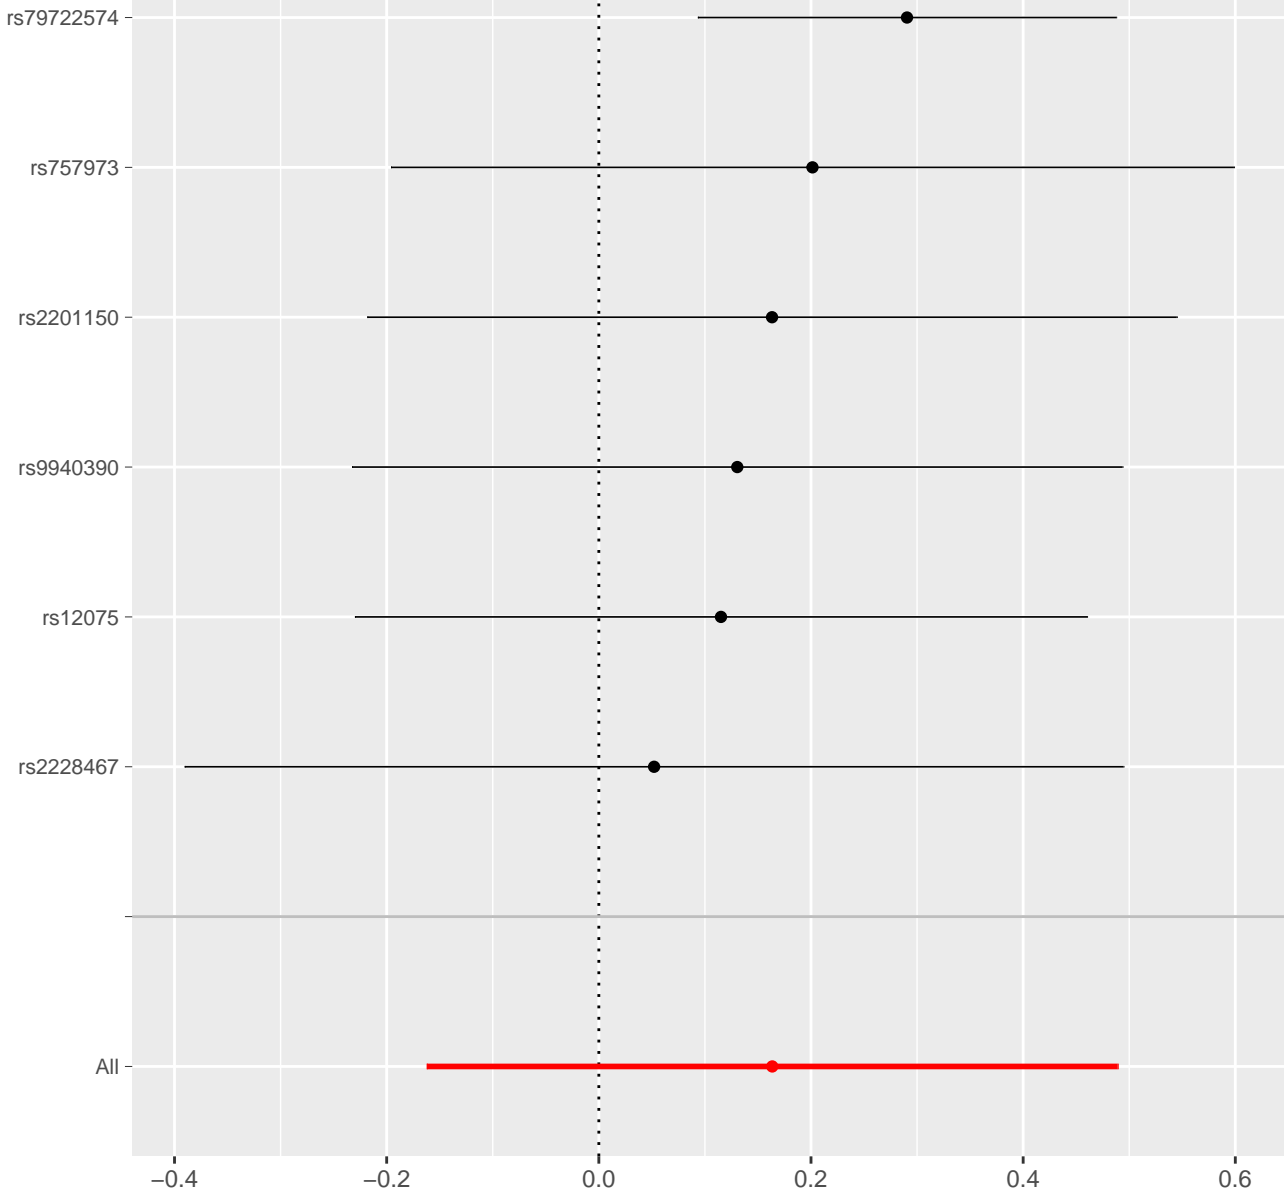

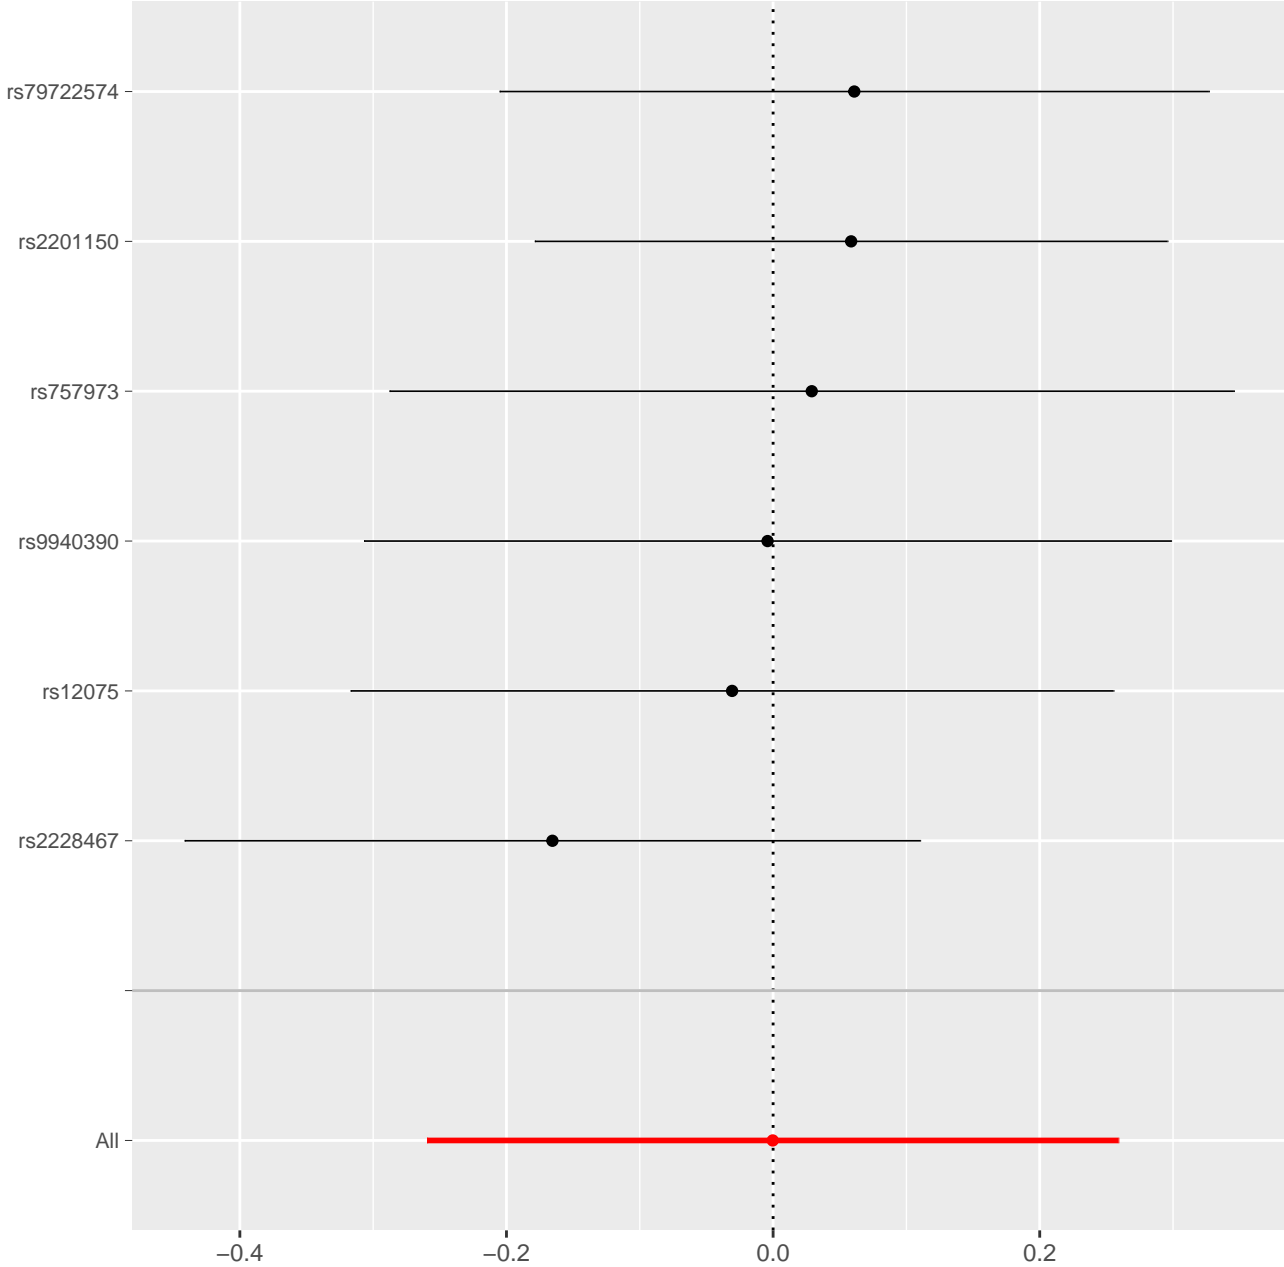

MR leave-one-out sensitivity analysis for  
'Eotaxin levels || id:ebi-IPs91-GCST90274764' on 'Ulcerative colitis || id:ieu-a-32'

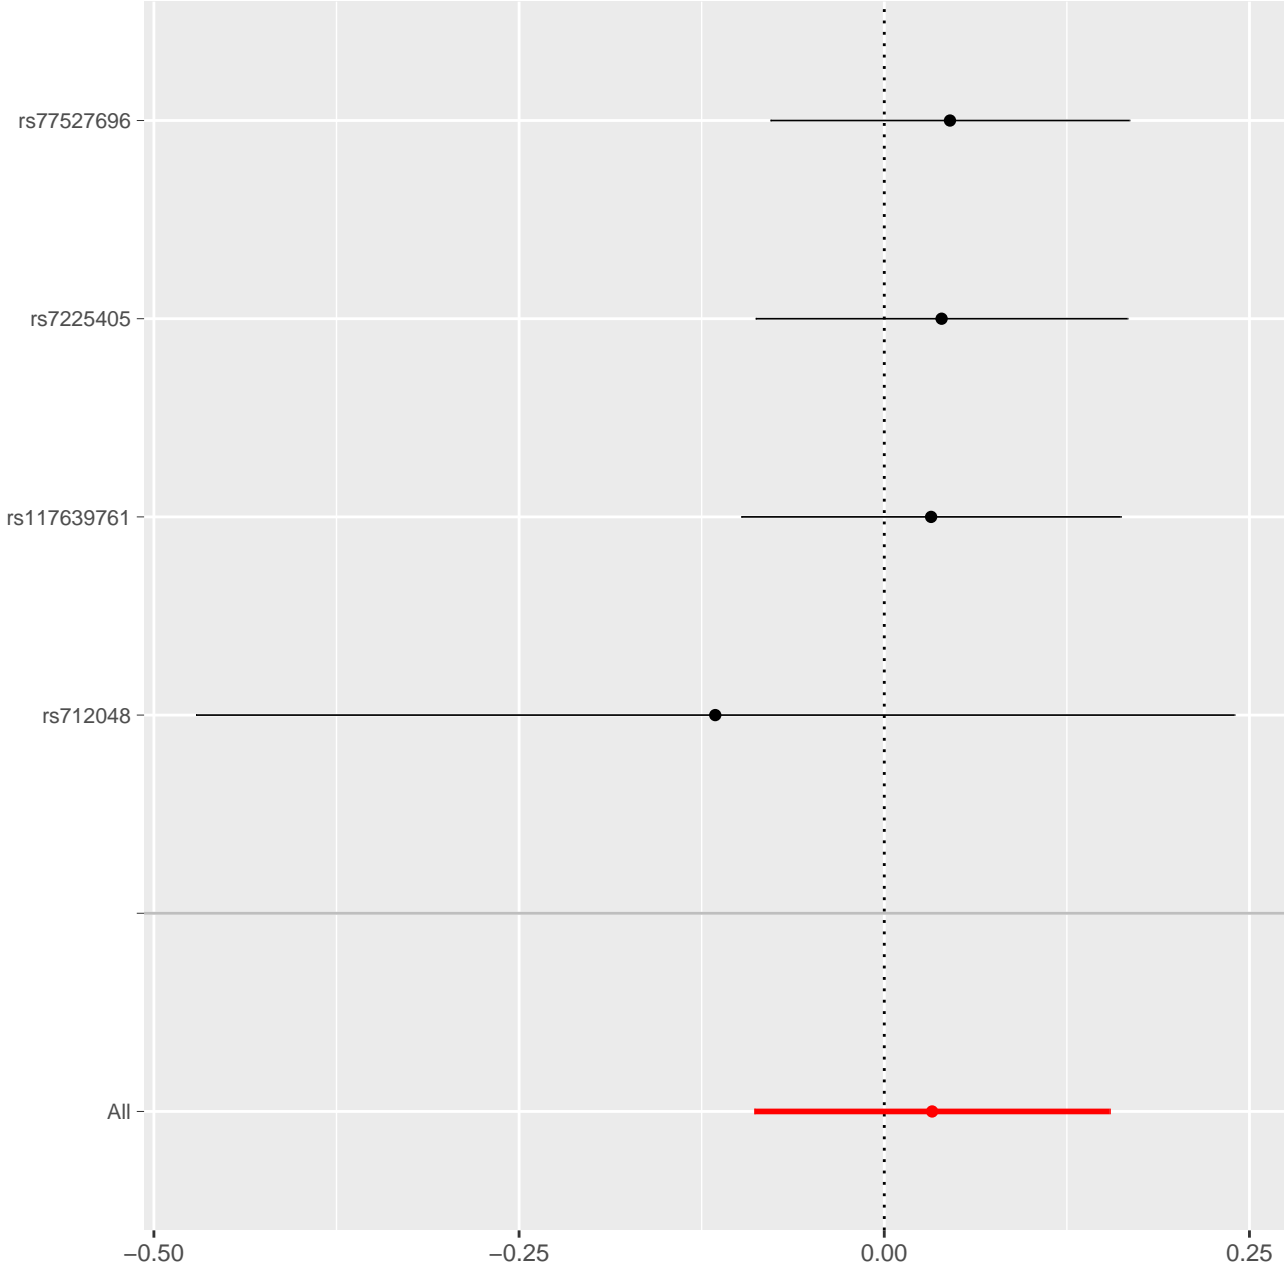

MR leave-one-out sensitivity analysis for 'C-C motif chemokine 23 levels || id:ebi-IPs91-GCST90274767' on 'Crohn's disease || id:ieu-a-30'

rs712048

rs77527696

rs7225405

rs117639761

All

0.0

0.2

0.4

0.6

MR leave-one-out sensitivity analysis for  
'C-C motif chemokine 23 levels || id:ebi-IPs91-GCST90274767' on 'Ulcerative colitis || id:ieu-a-32'

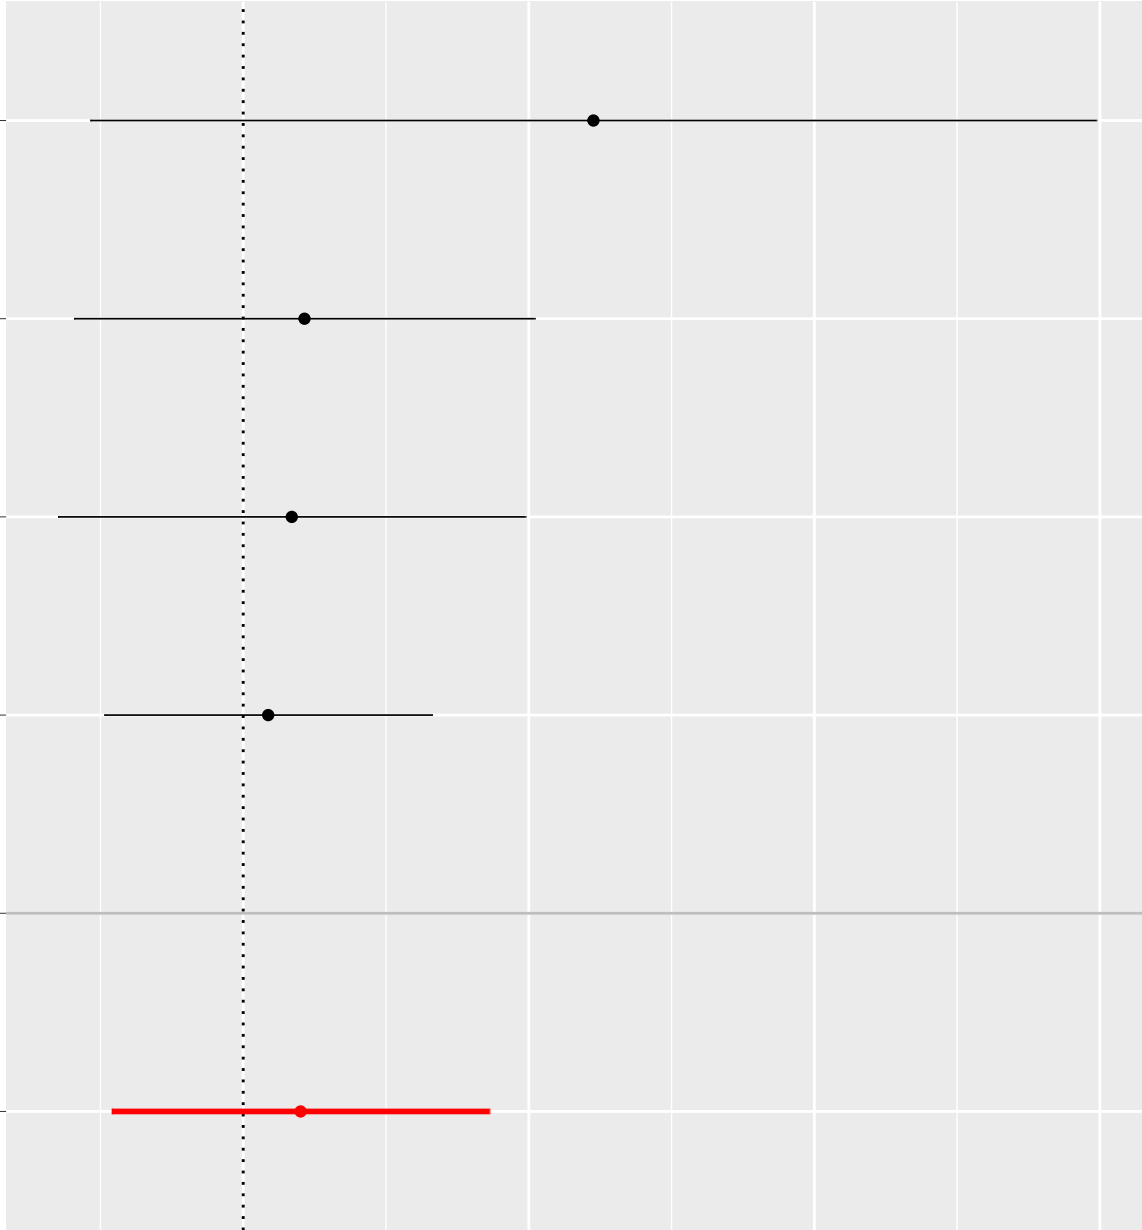

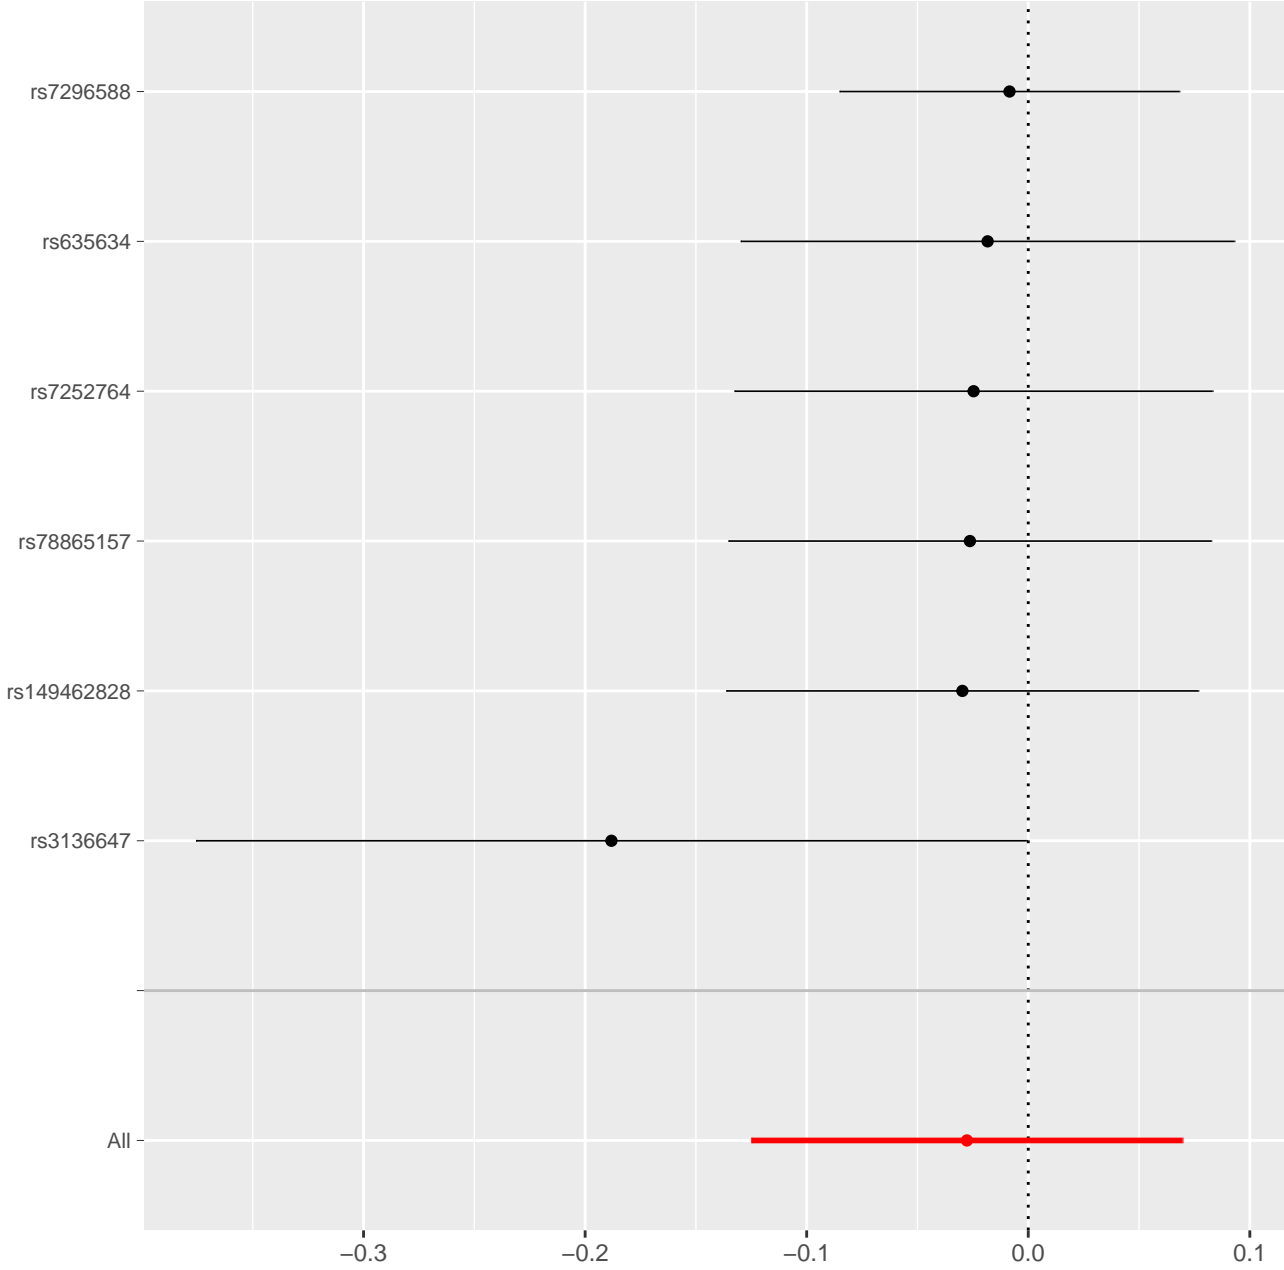

MR leave-one-out sensitivity analysis for  
'C-C motif chemokine 25 levels || id:ebi-IPs91-GCST90274768' on 'Crohn's disease || id:ieu-a-30'

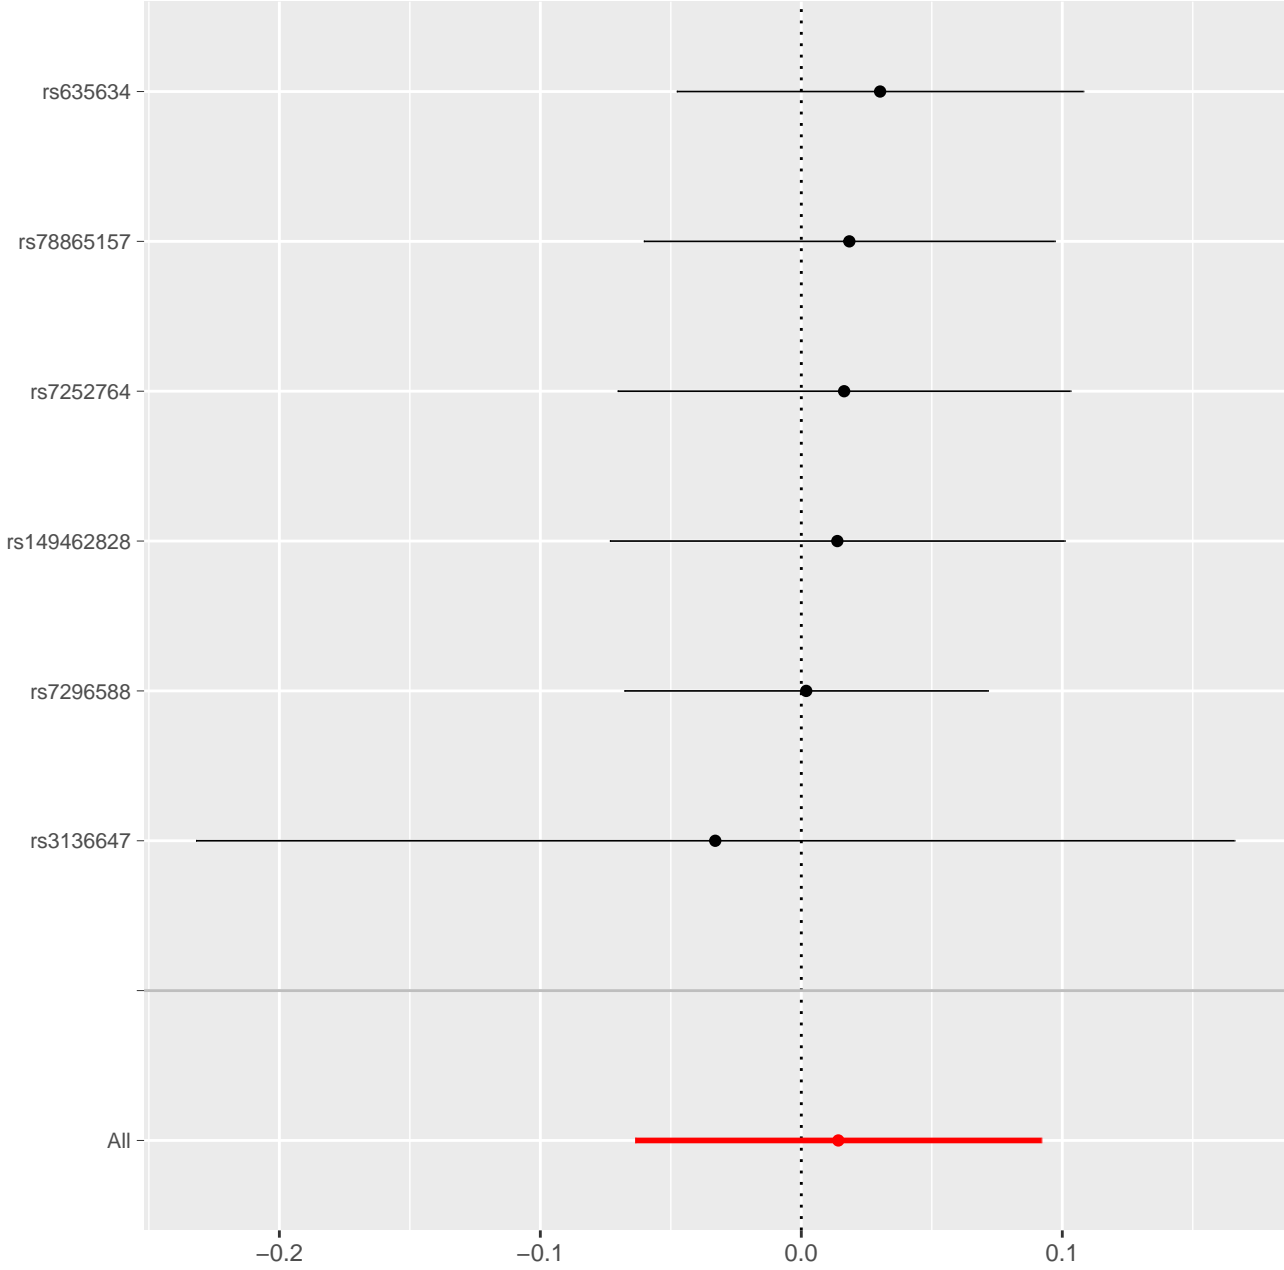

MR leave-one-out sensitivity analysis for 'C-C motif chemokine 25 levels || id:ebi-IPs91-GCST90274768' on 'Ulcerative colitis || id:ieu-a-32'

rs6580980

rs76669782

rs4866742

rs139902

All

-0.50

-0.25

0.00

0.25

MR leave-one-out sensitivity analysis for  
'C-C motif chemokine 28 levels || id:ebi-IPs91-GCST90274769' on 'Crohn's disease || id:ieu-a-30'

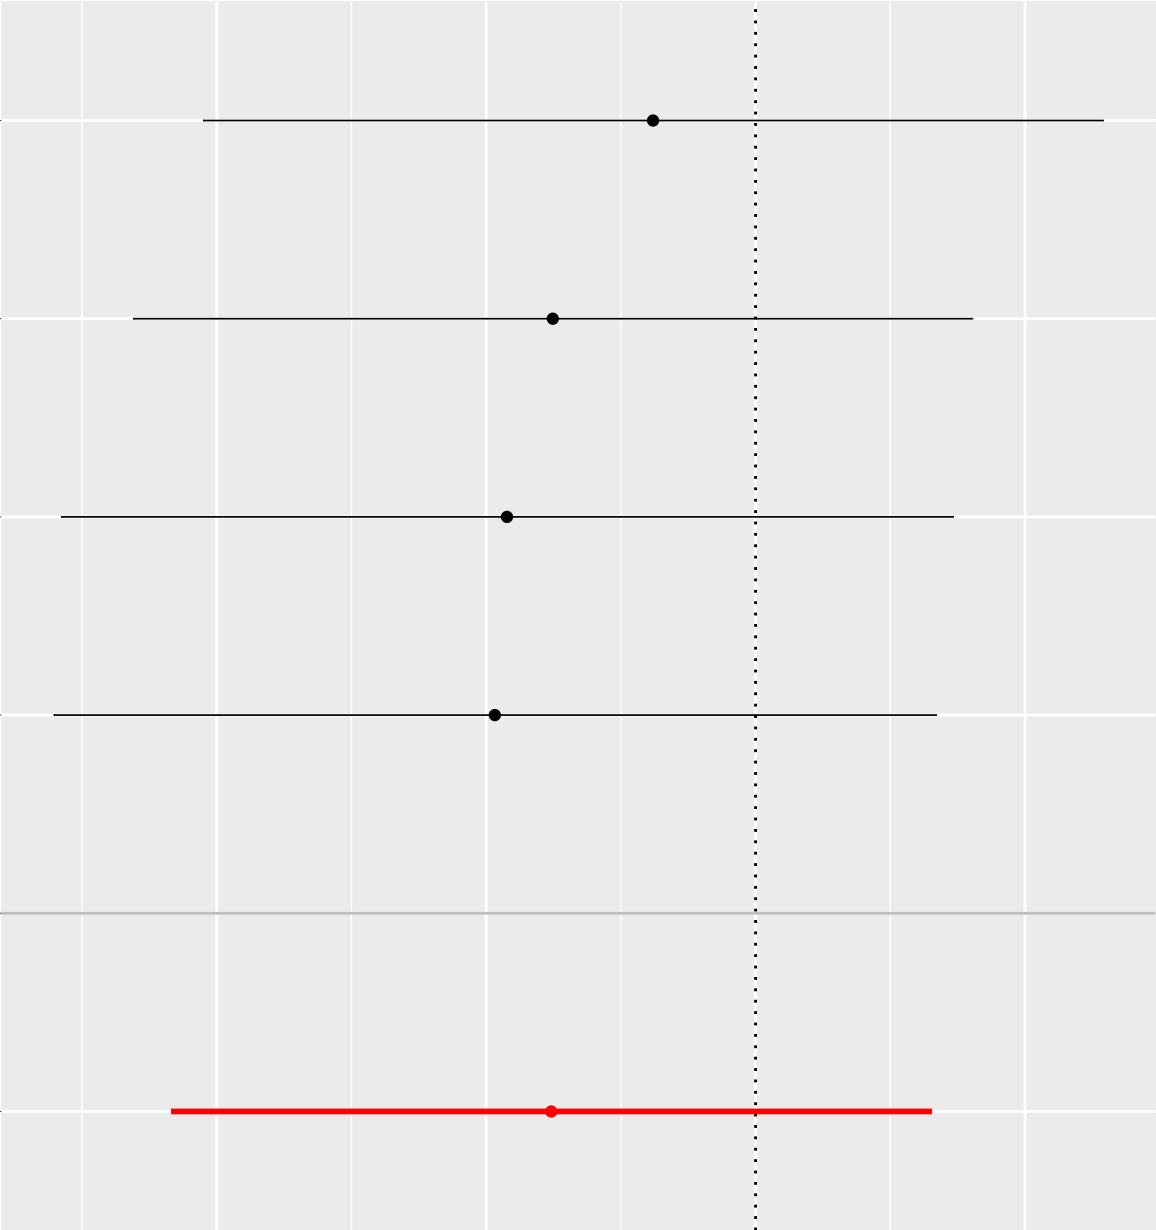

rs76669782

rs6580980

rs4866742

rs139902

All

-0.5

0.0

0.5

1.0

MR leave-one-out sensitivity analysis for

'C-C motif chemokine 28 levels || id:ebi-IPs91-GCST90274769' on 'Ulcerative colitis || id:ieu-a-32'

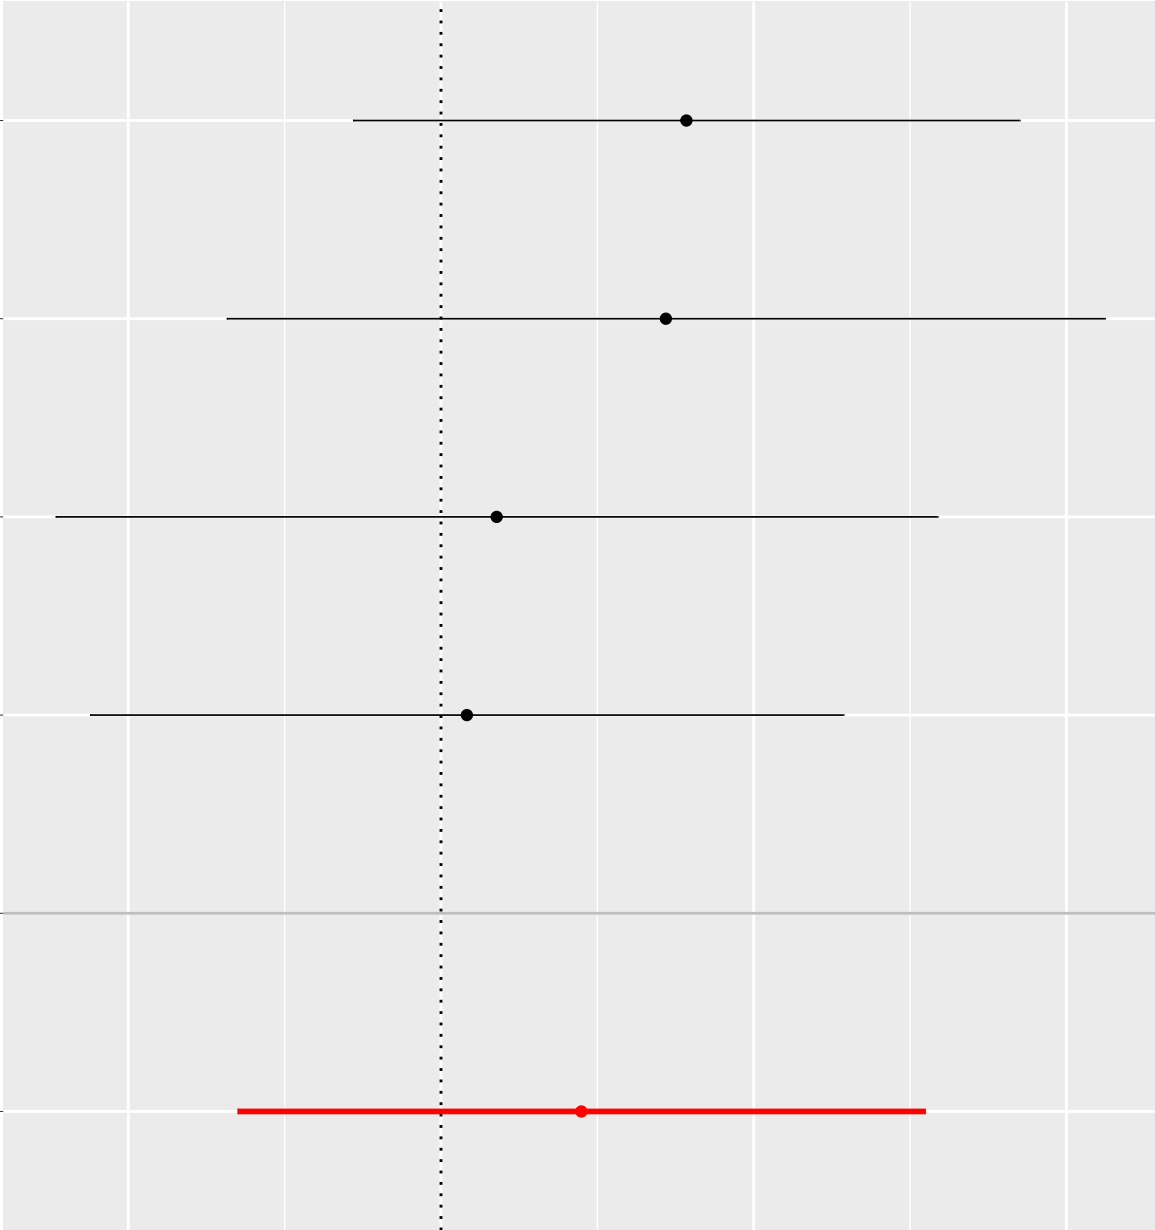



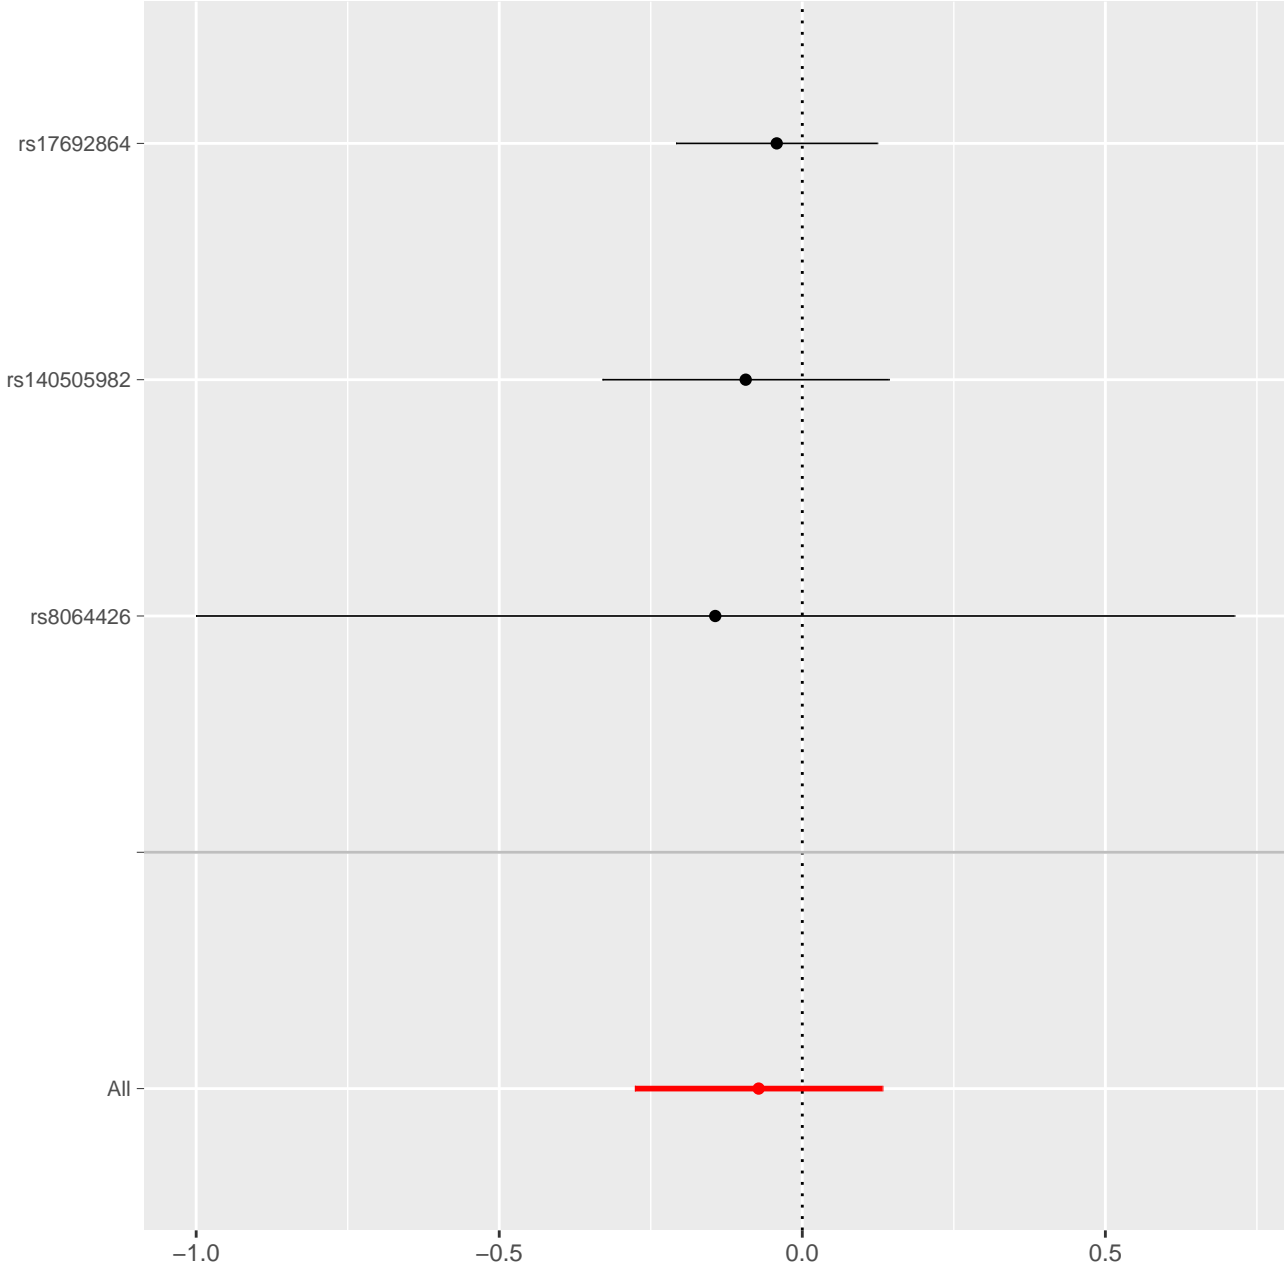

MR leave-one-out sensitivity analysis for 'C-C motif chemokine 4 levels || id:ebi-IPs91-GCST90274770' on 'Crohn's disease || id:ieu-a-30'

rs17692864

rs140505982

rs8064426

All

-0.4

-0.2

0.0

0.2

MR leave-one-out sensitivity analysis for  
'C-C motif chemokine 4 levels || id:ebi-IPs91-GCST90274770' on 'Ulcerative colitis || id:ieu-a-32'

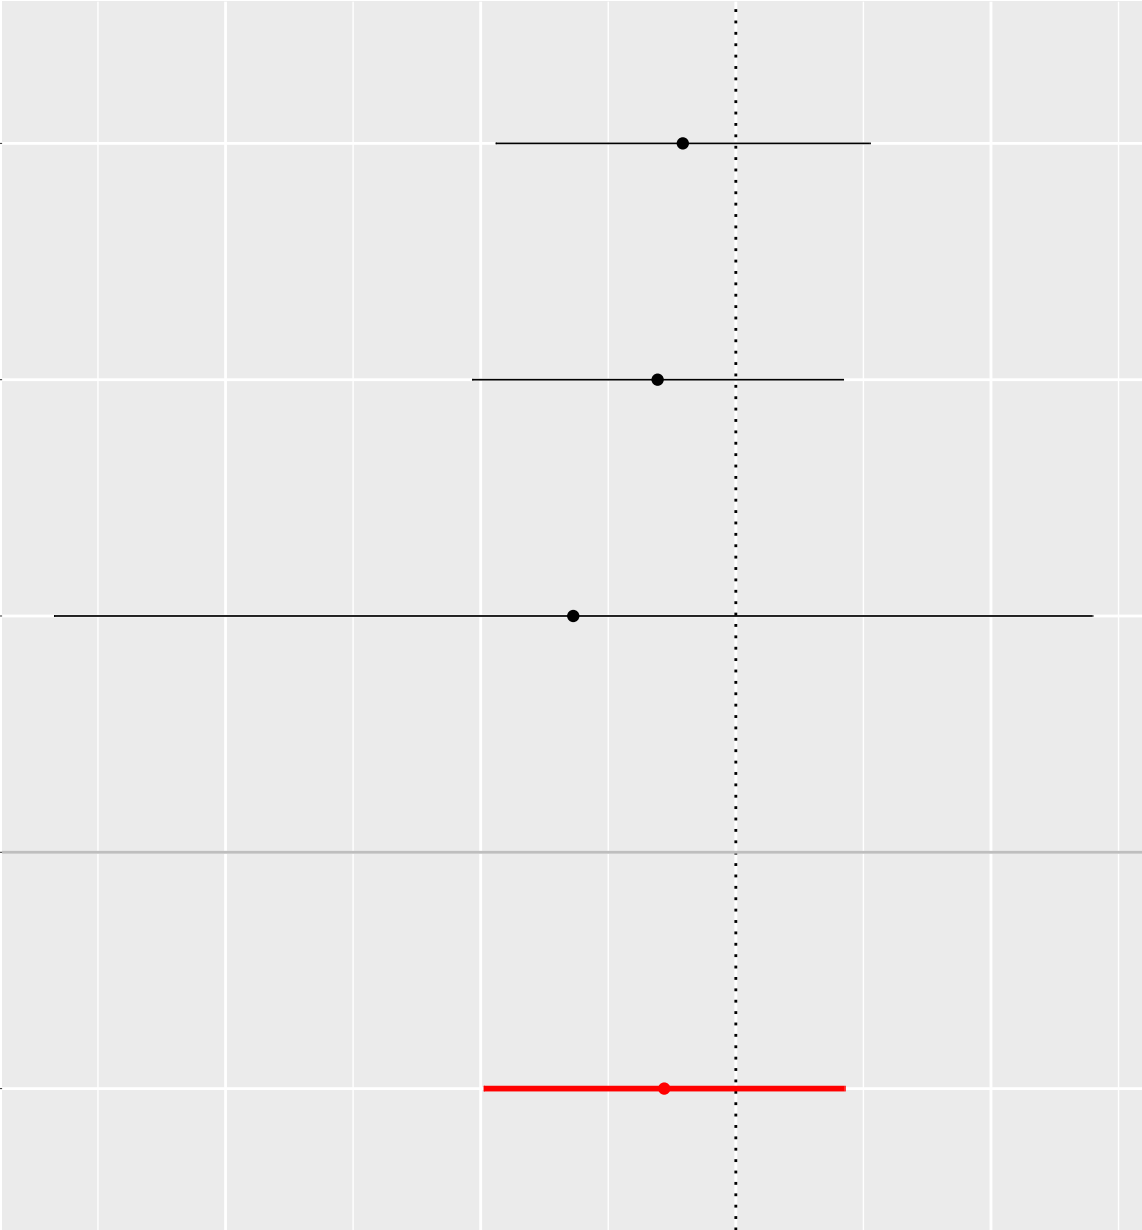

rs11265493

rs4672486

rs72837690

rs3828139

rs56272634

All

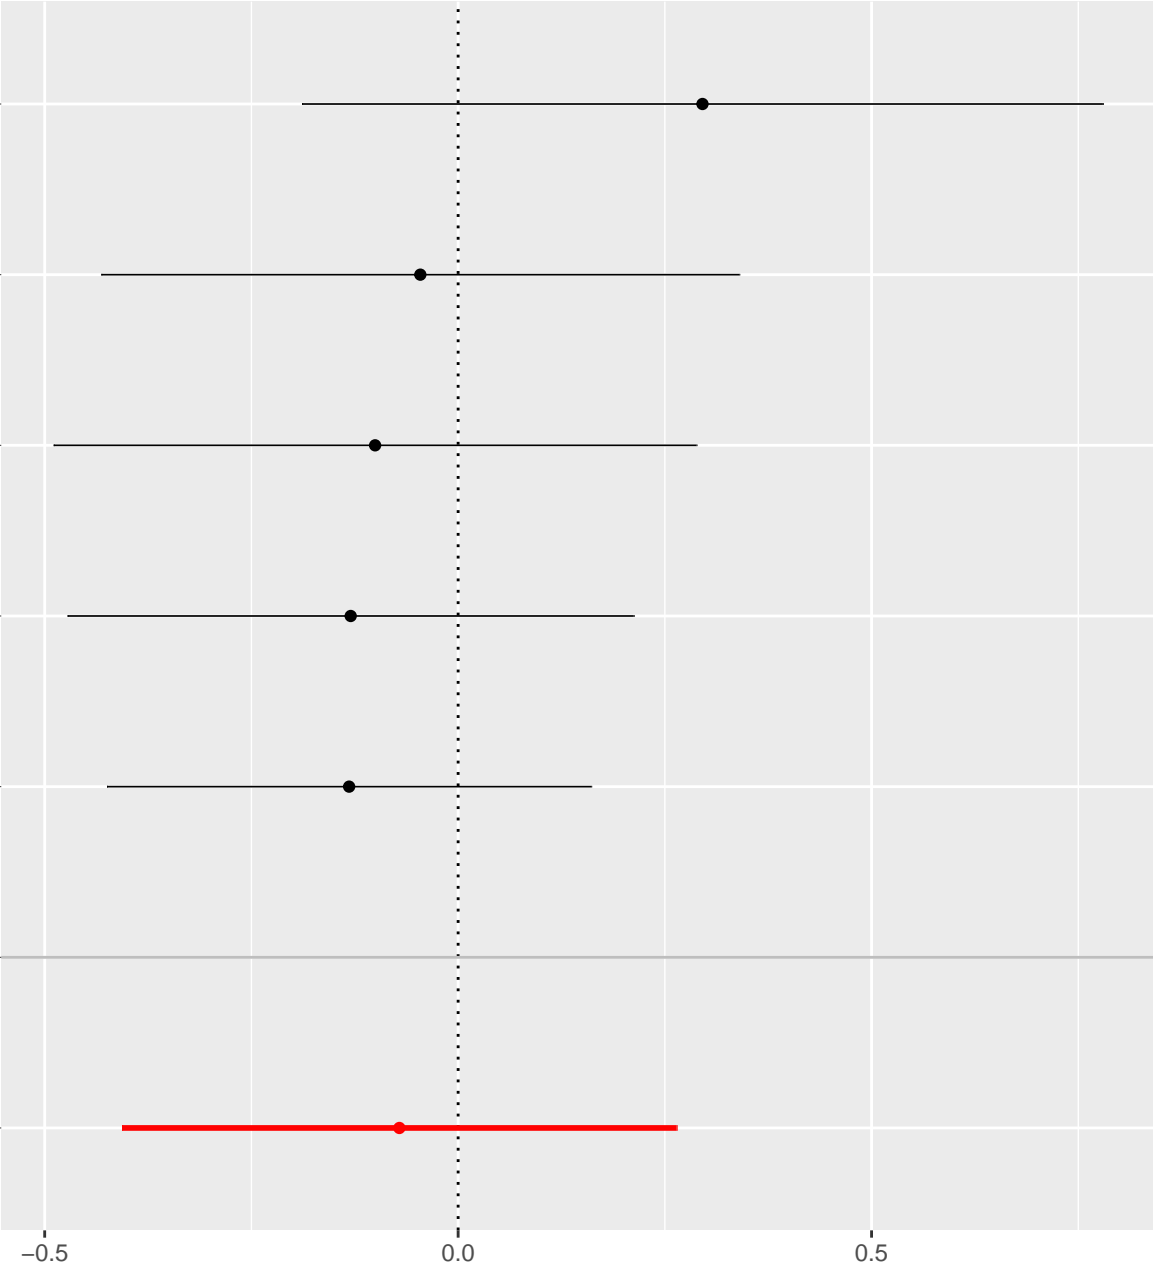

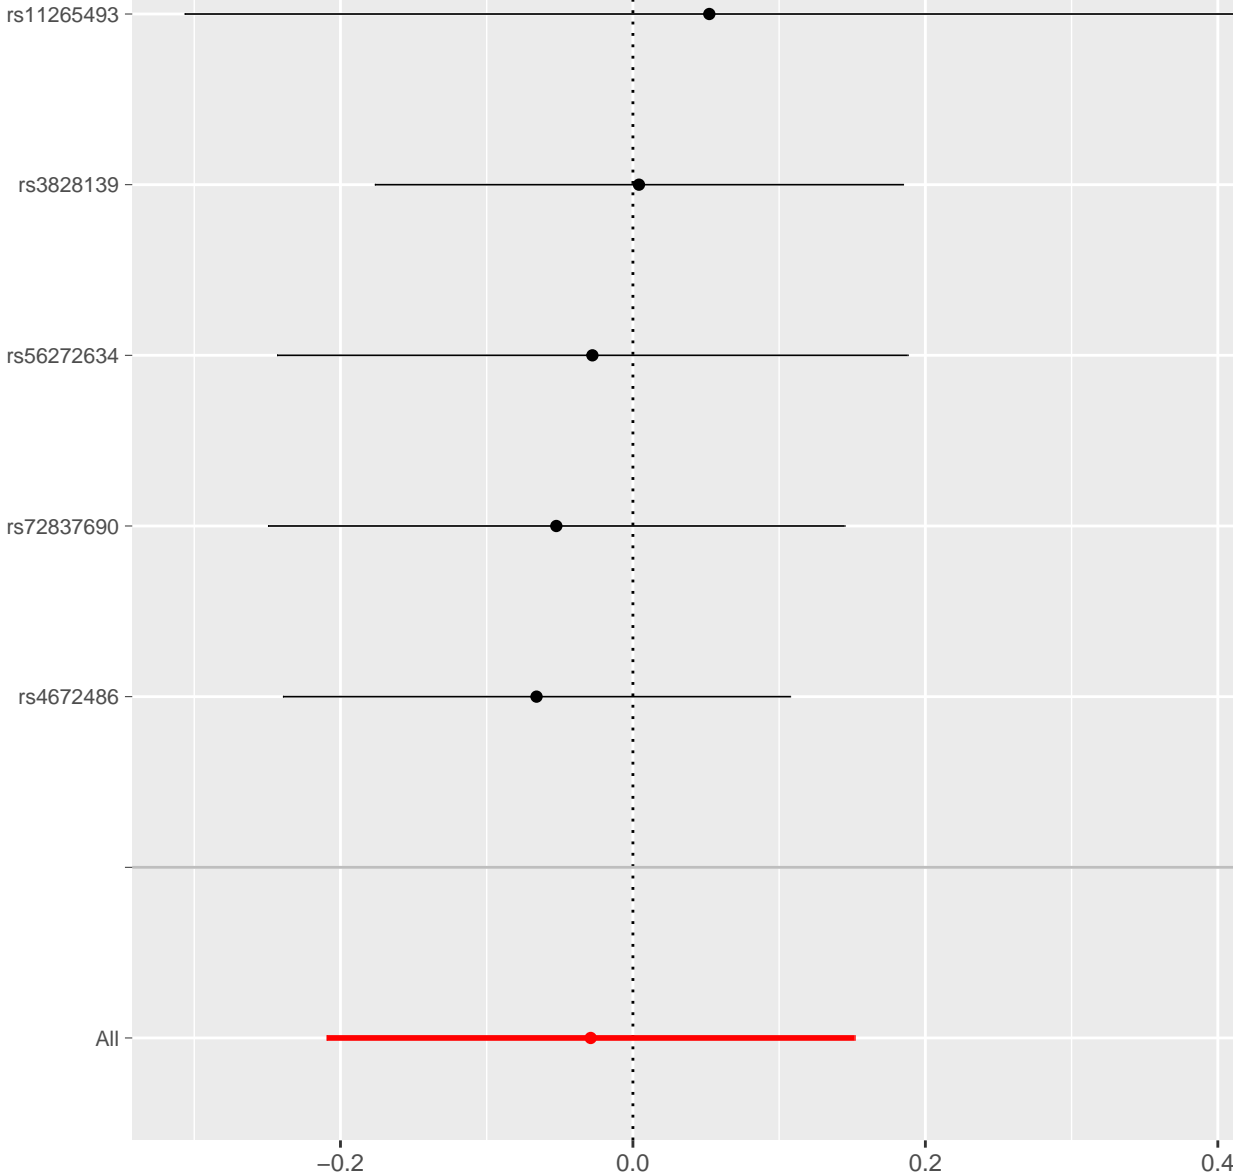

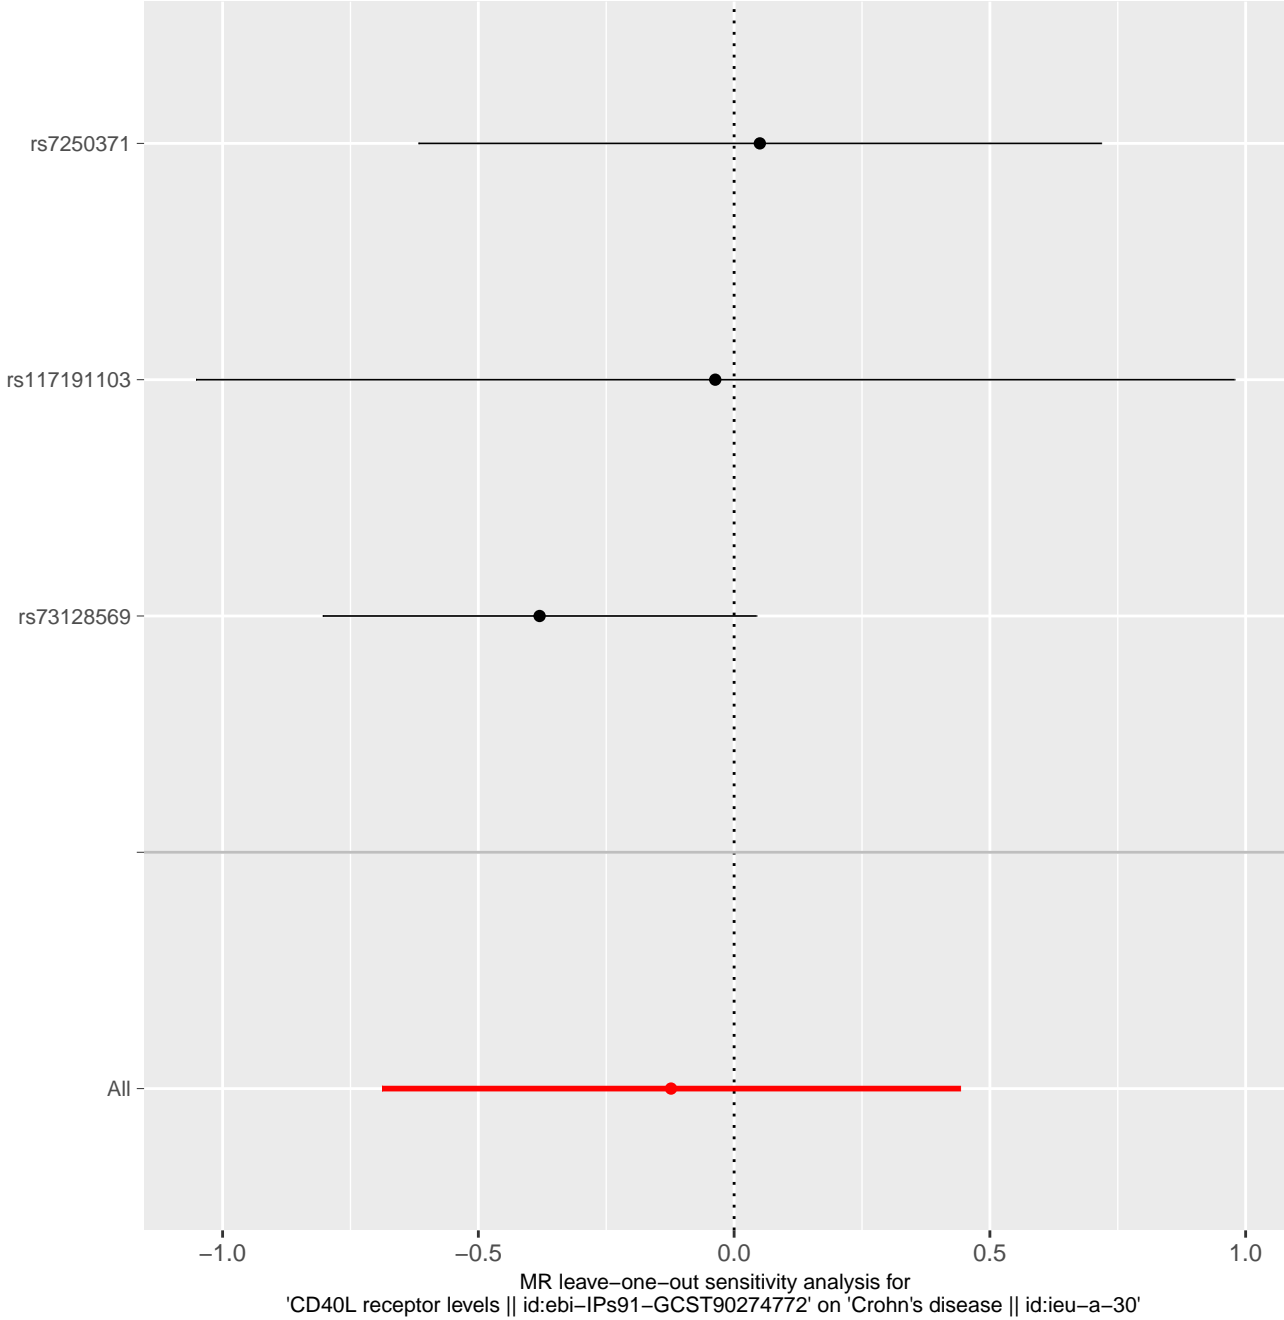

rs117191103

rs73128569

rs7250371

All

MR leave-one-out sensitivity analysis for 'CD40L receptor levels || id:ebi-IPs91-GCST90274772' on 'Ulcerative colitis || id:ieu-a-32'

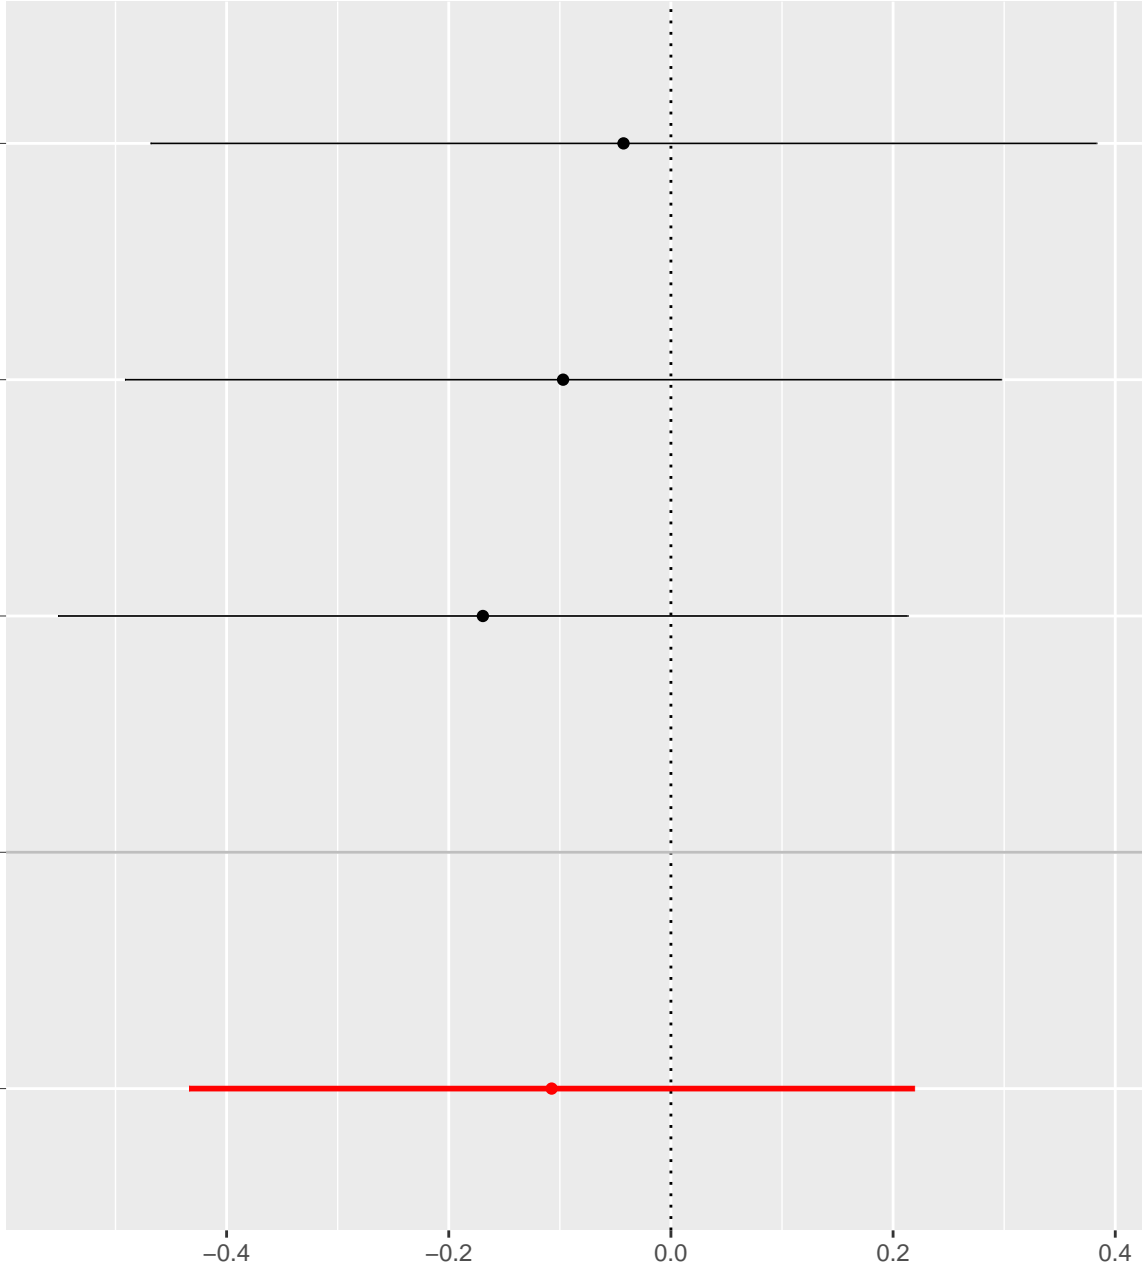

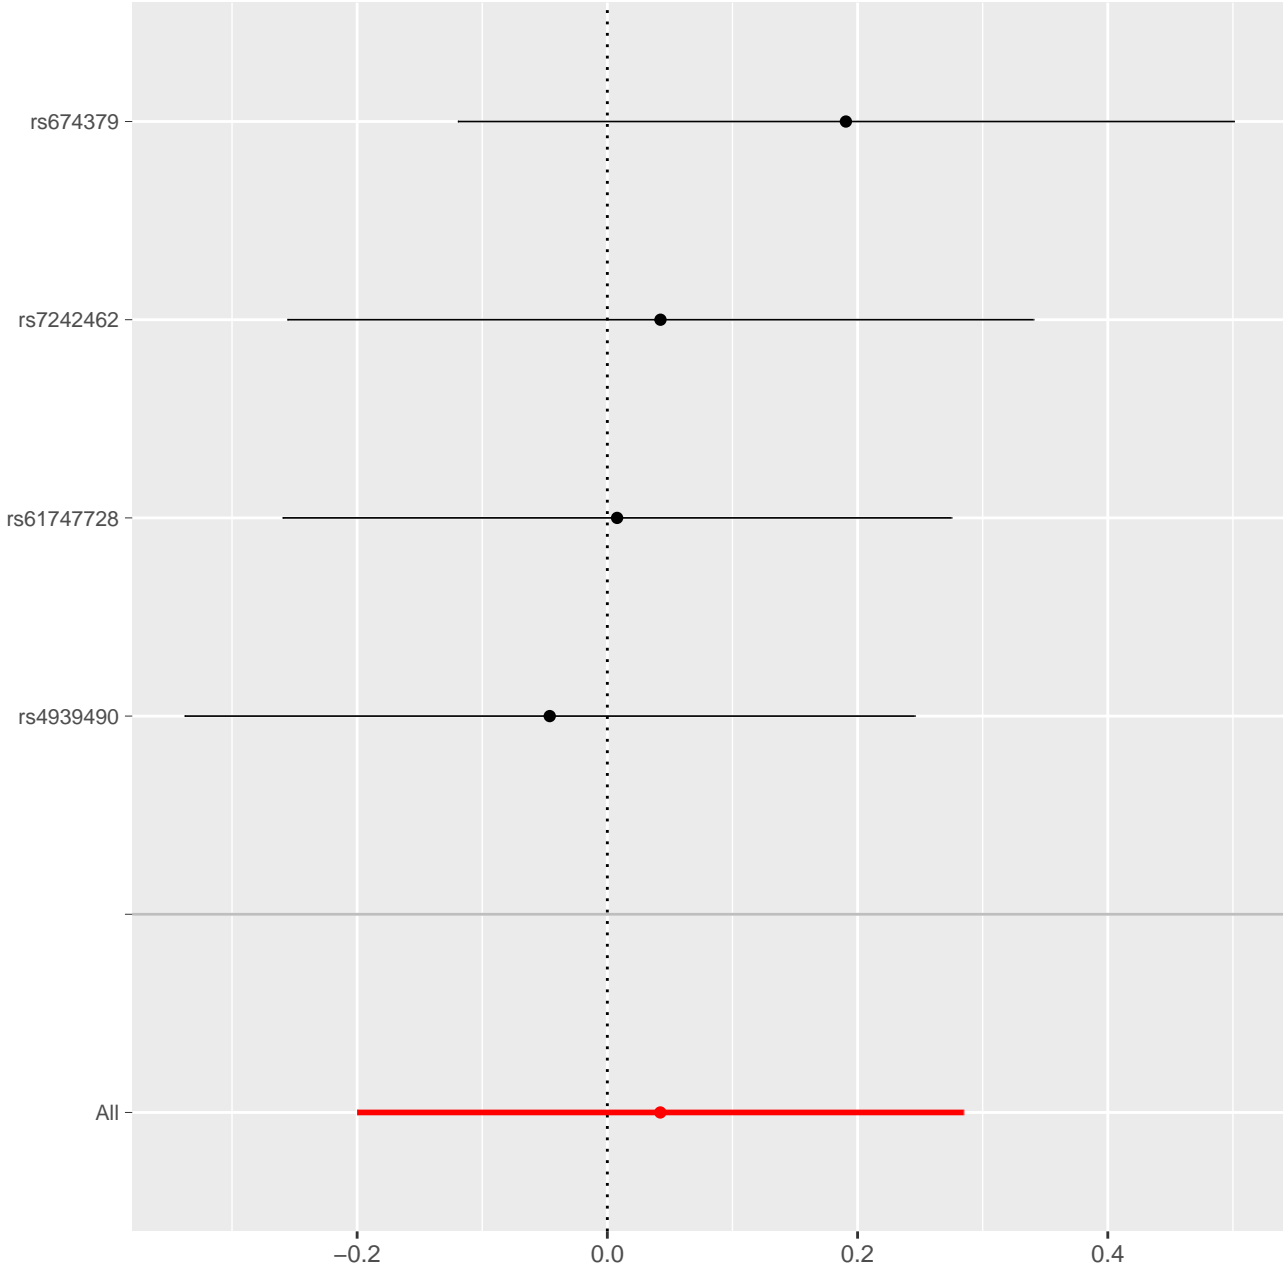

MR leave-one-out sensitivity analysis for 'T-cell surface glycoprotein CD5 levels || id:ebi-IPs91-GCST90274773' on 'Crohn's disease || id:ieu-a-30'

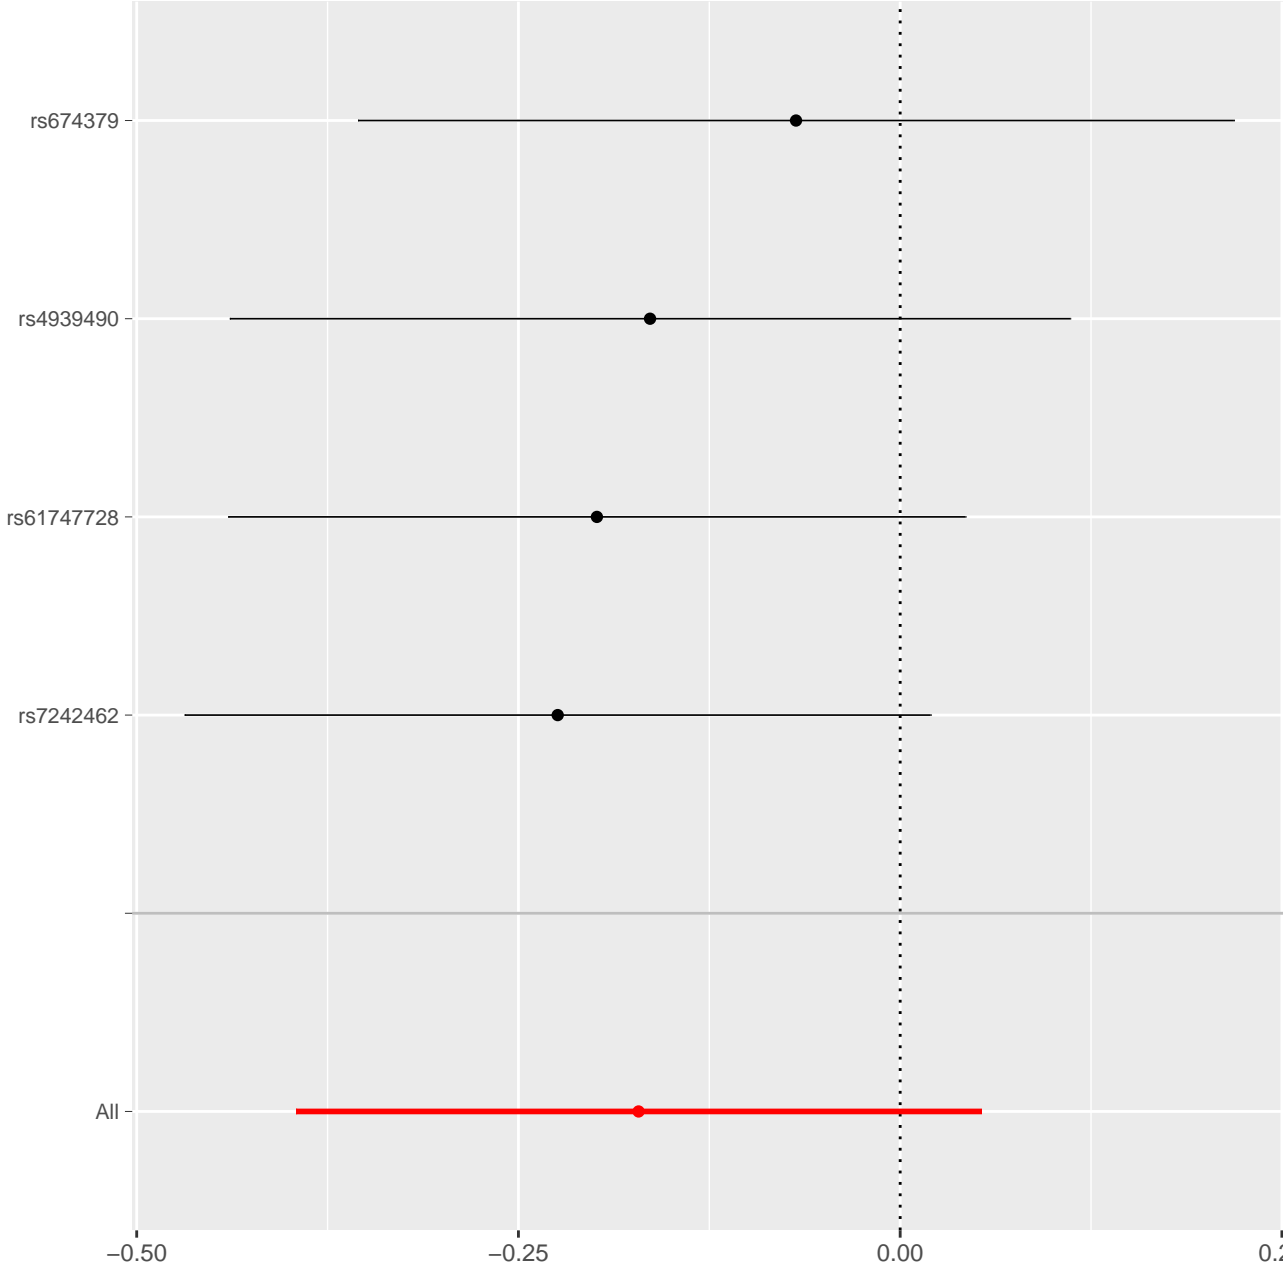

MR leave-one-out sensitivity analysis for 'T-cell surface glycoprotein CD5 levels || id:ebi-IPs91-GCST90274773' on 'Ulcerative colitis || id:ieu-a-32'



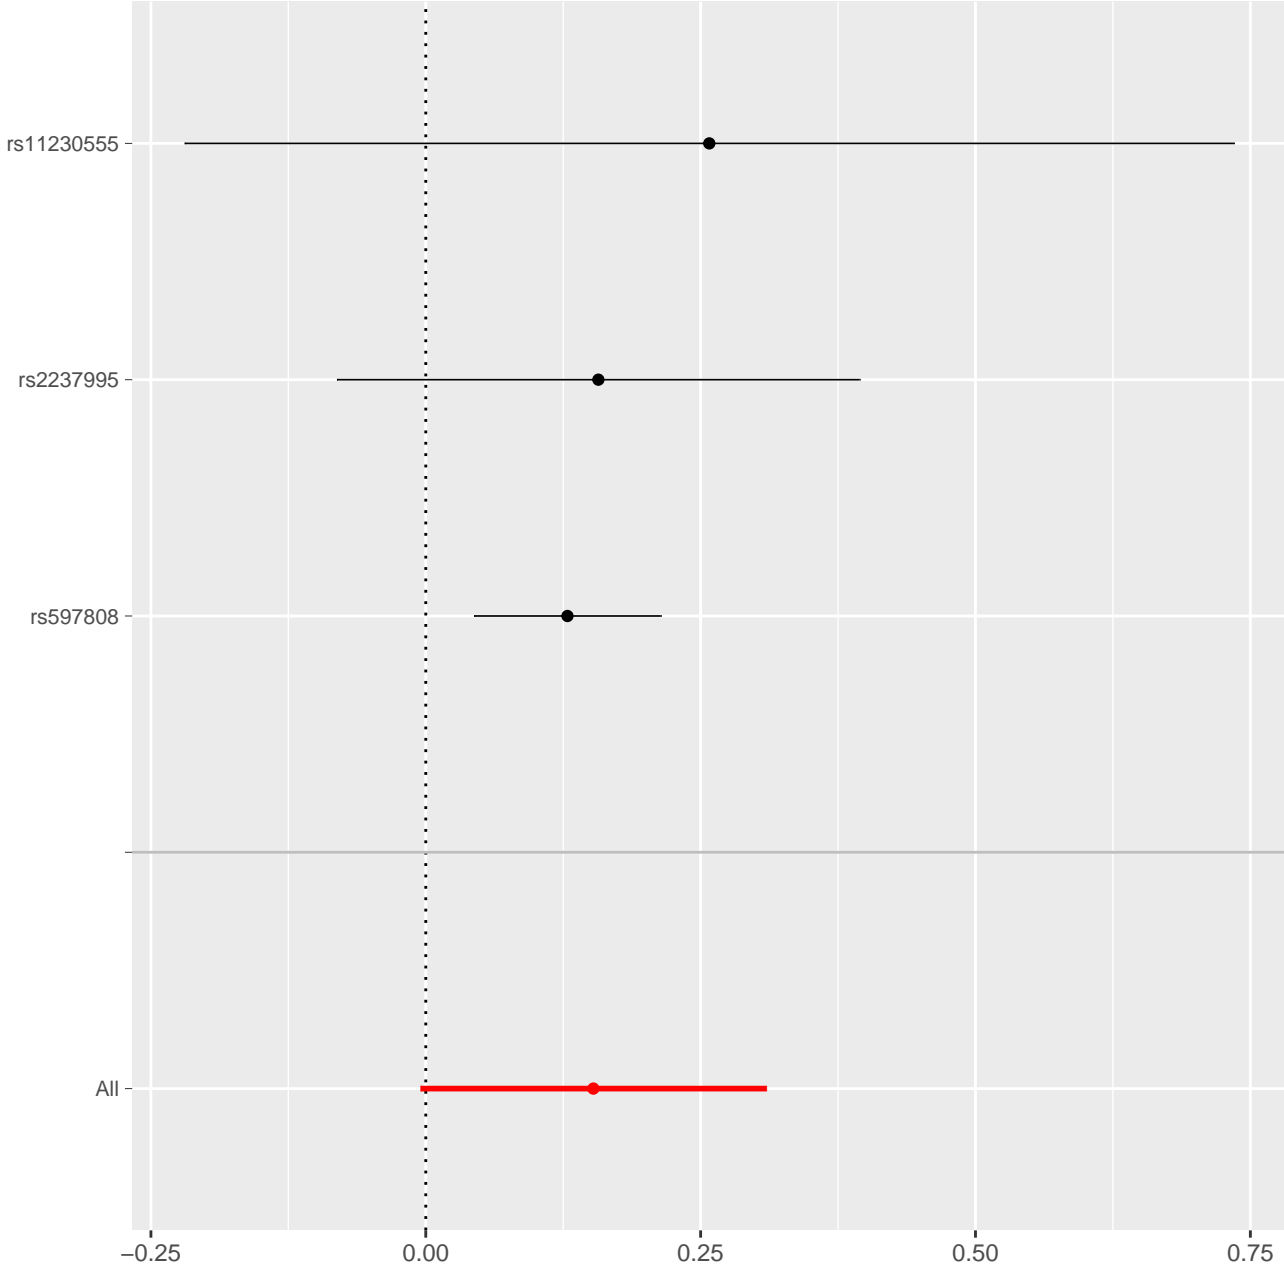

MR leave-one-out sensitivity analysis for 'T-cell surface glycoprotein CD6 isoform levels || id:ebi-IPs91-GCST90274774' on 'Crohn's disease || id:ieu-a-30'

rs11230555

rs2237995

rs597808

All

-0.2

0.0

0.2

0.4

0.6

MR leave-one-out sensitivity analysis for  
'T-cell surface glycoprotein CD6 isoform levels || id:ebi-IPs91-GCST90274774' on 'Ulcerative colitis || id:ieu-a-32'

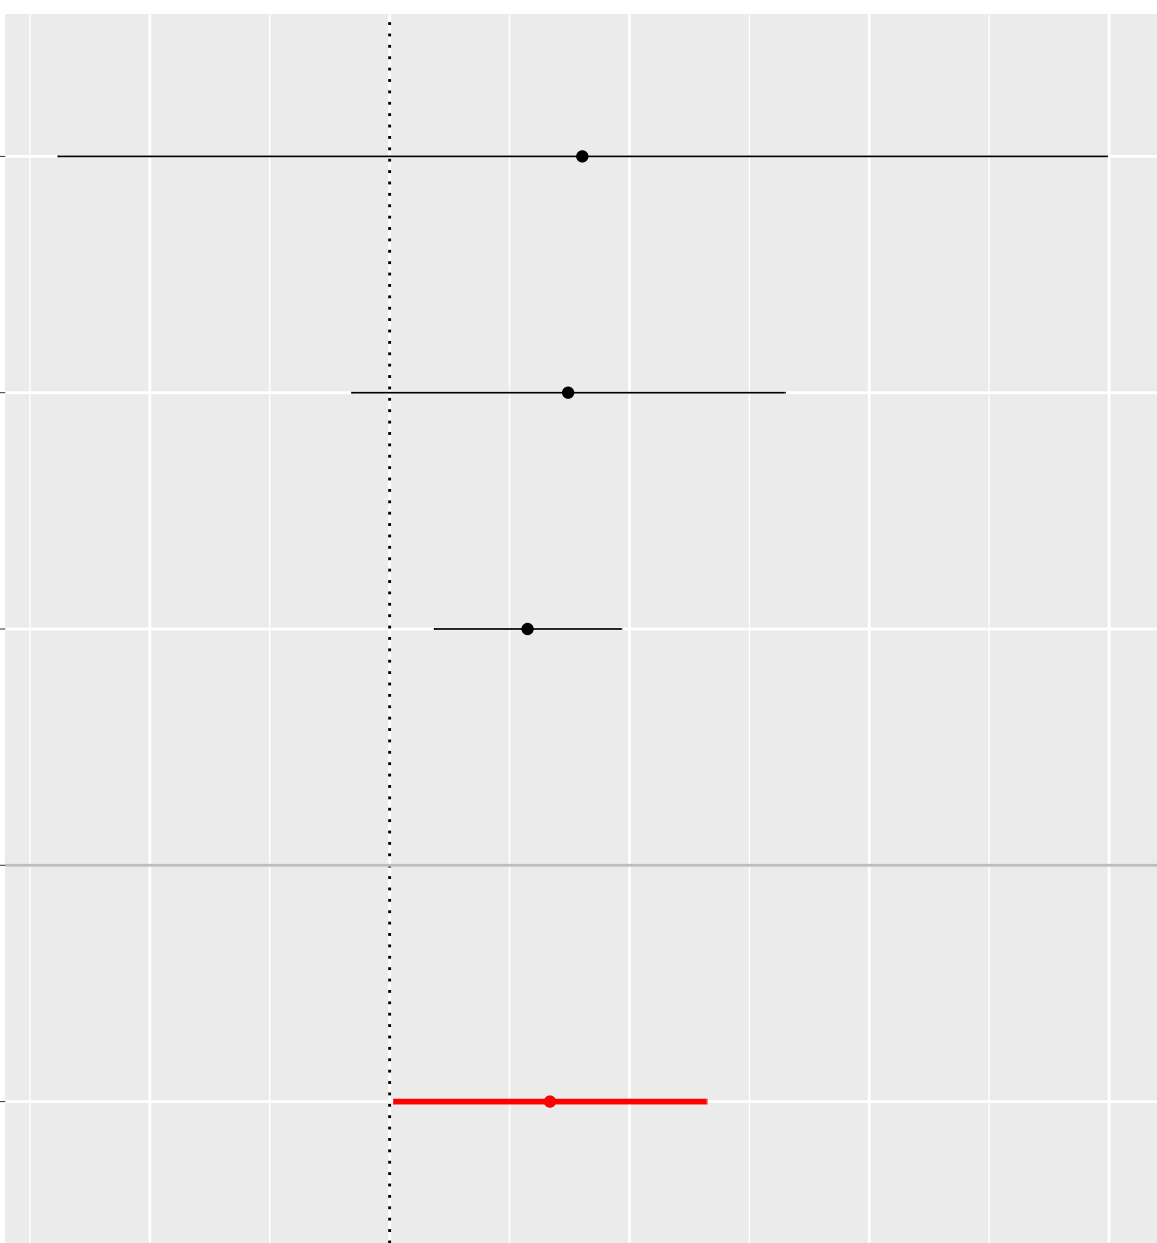

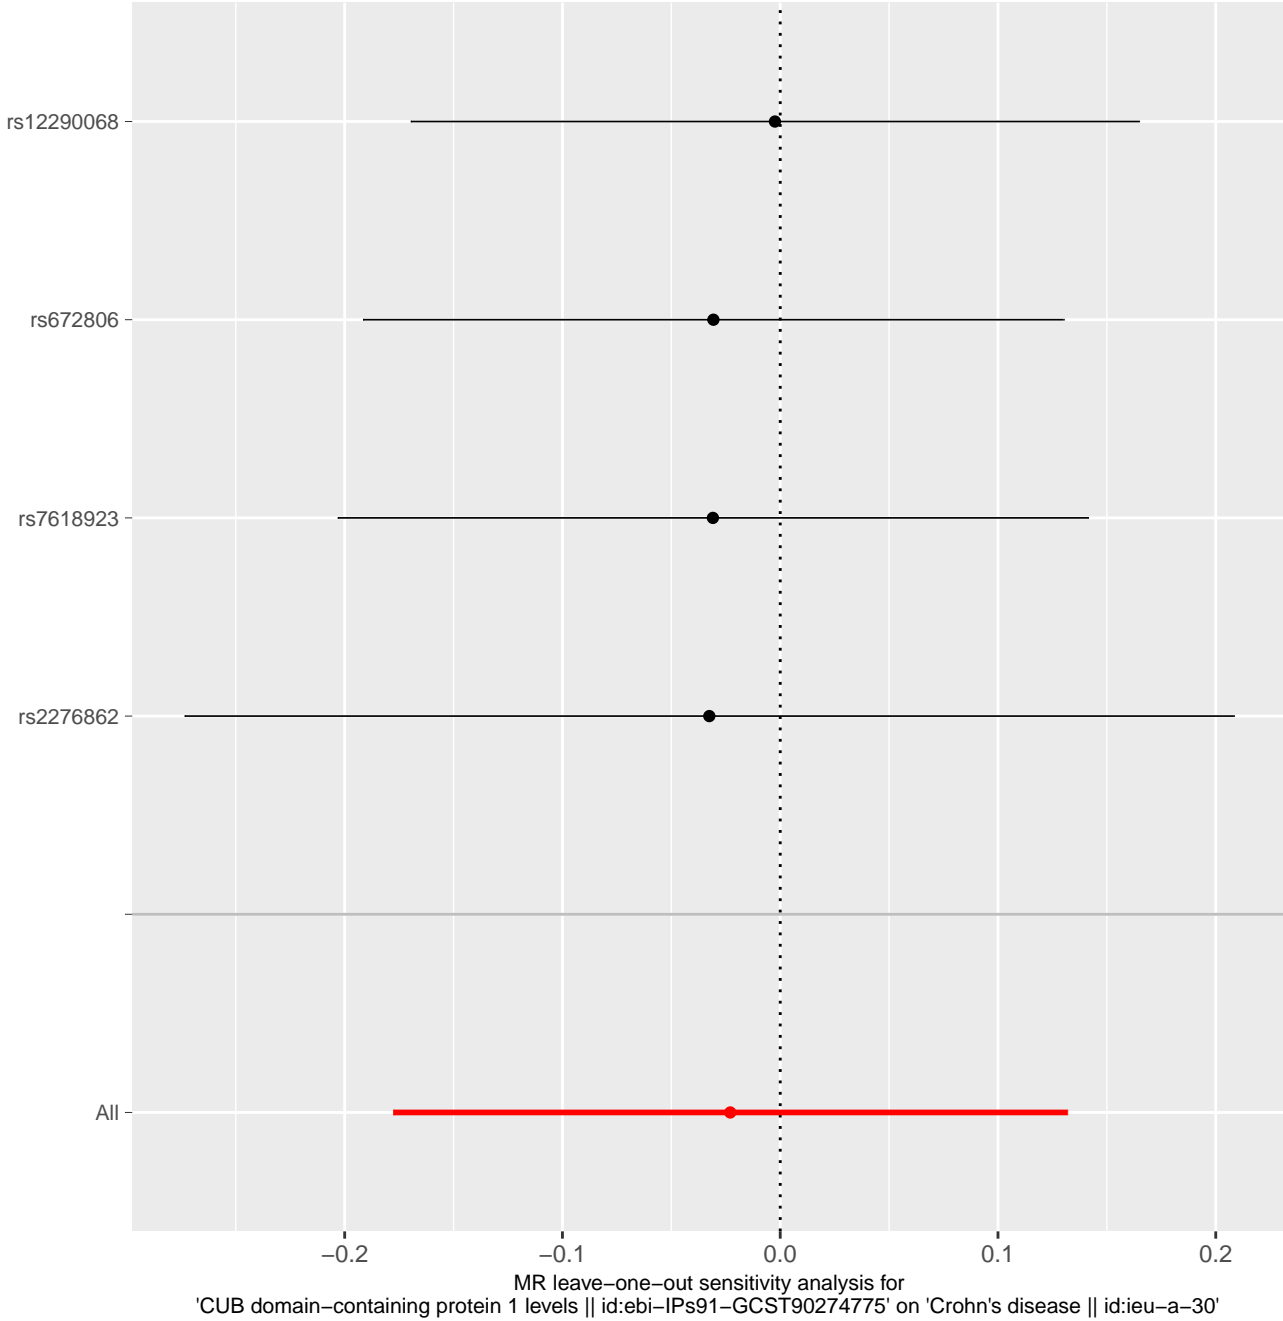

rs2276862

rs672806

rs1229068

rs7618923

All

MR leave-one-out sensitivity analysis for  
'CUB domain-containing protein 1 levels || id:ebi-IPs91-GCST90274775' on 'Ulcerative colitis || id:ieu-a-32'

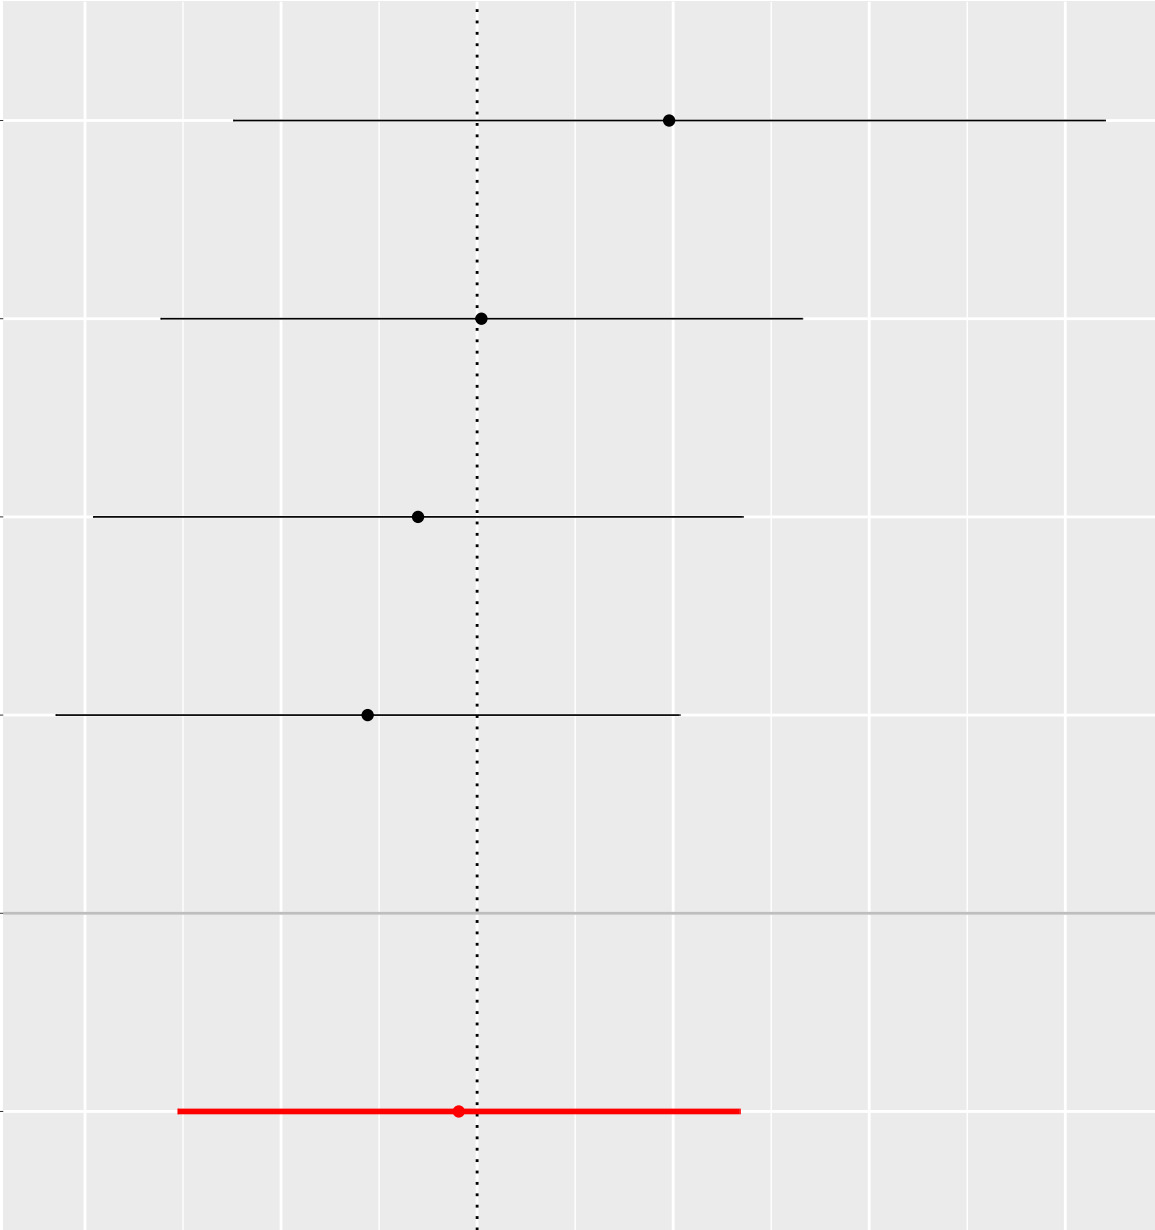

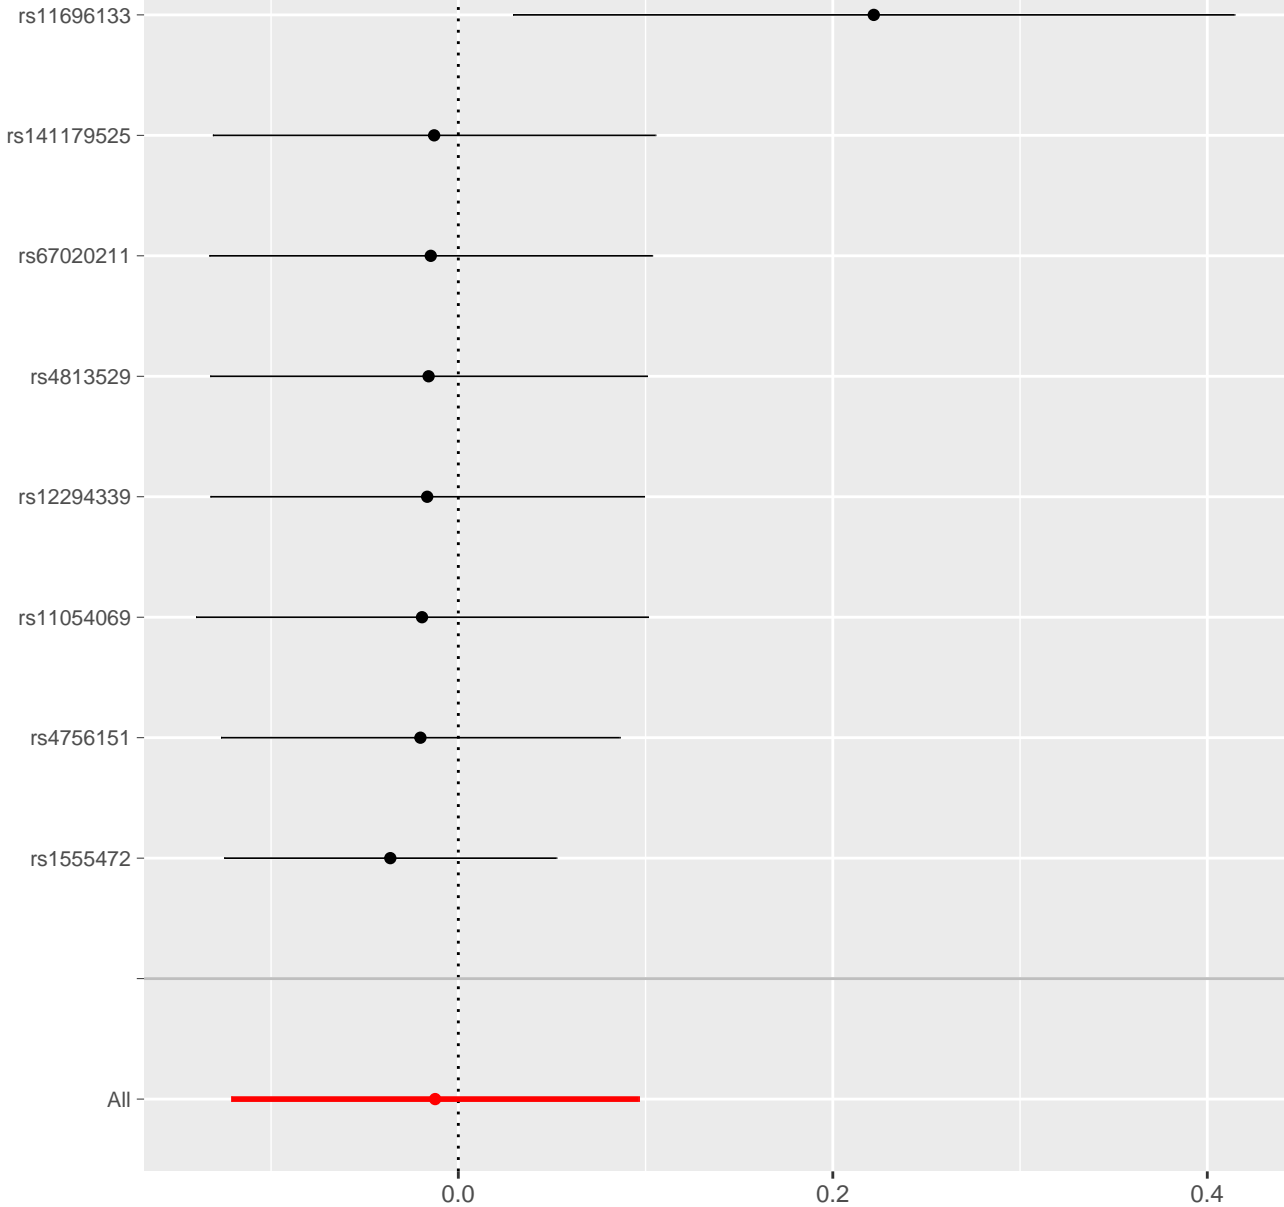

MR leave-one-out sensitivity analysis for 'Cystatin D levels || id:ebi-IPs91-GCST90274777' on 'Crohn's disease || id:ieu-a-30'

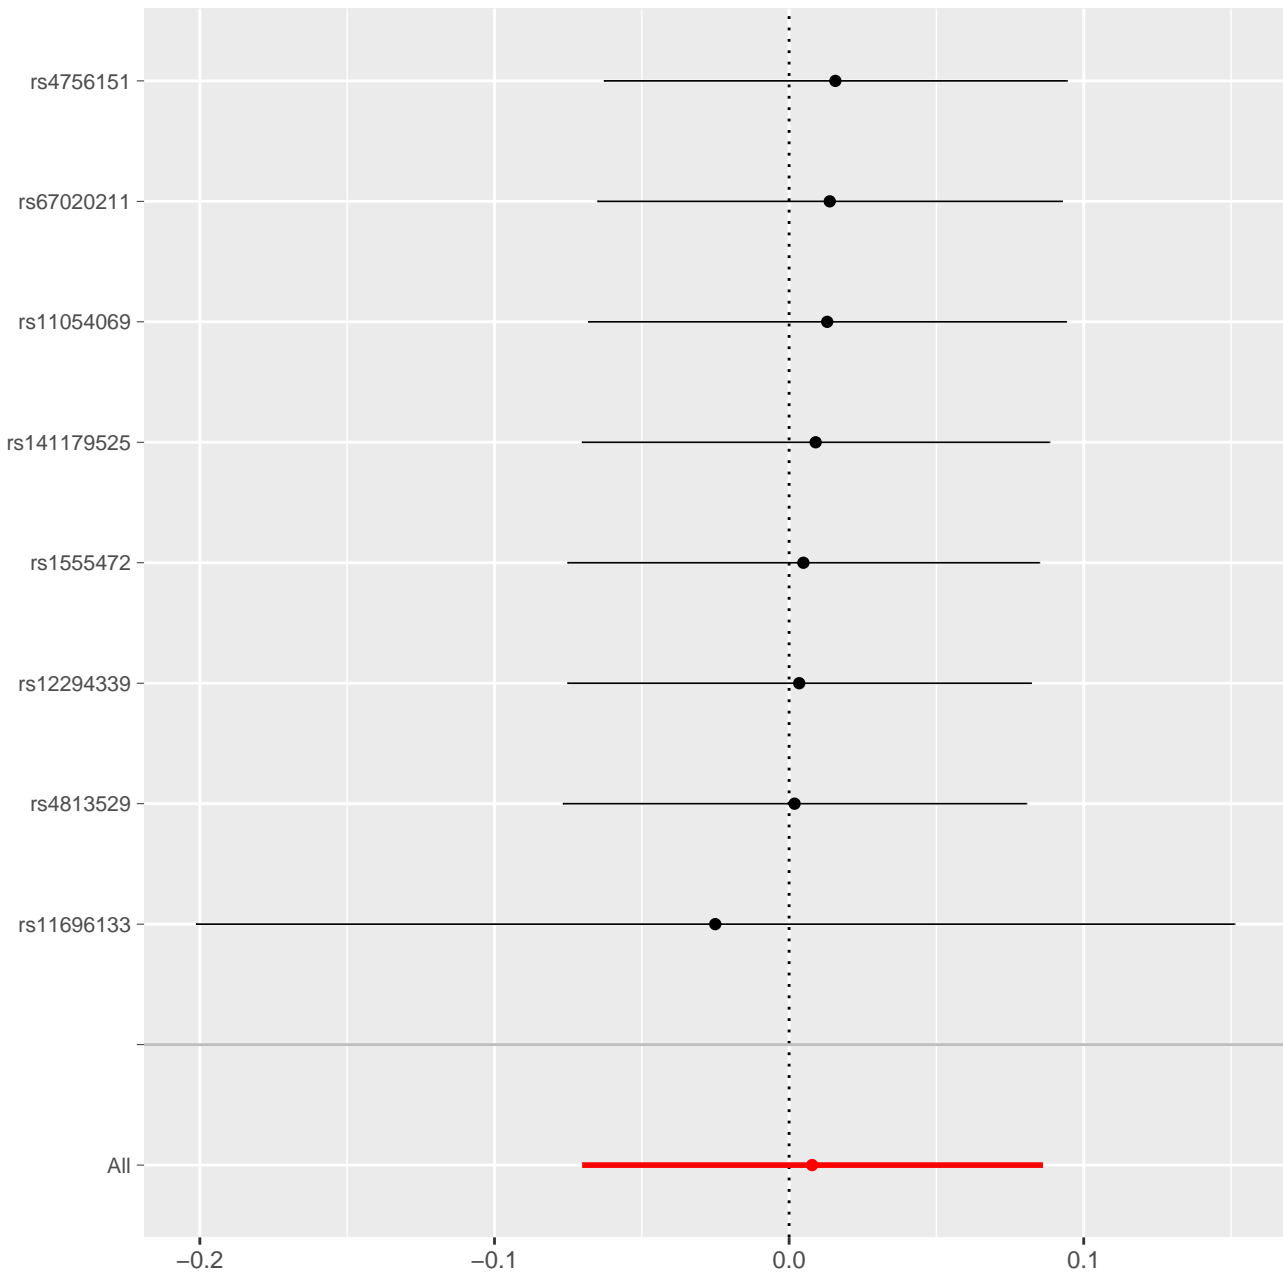

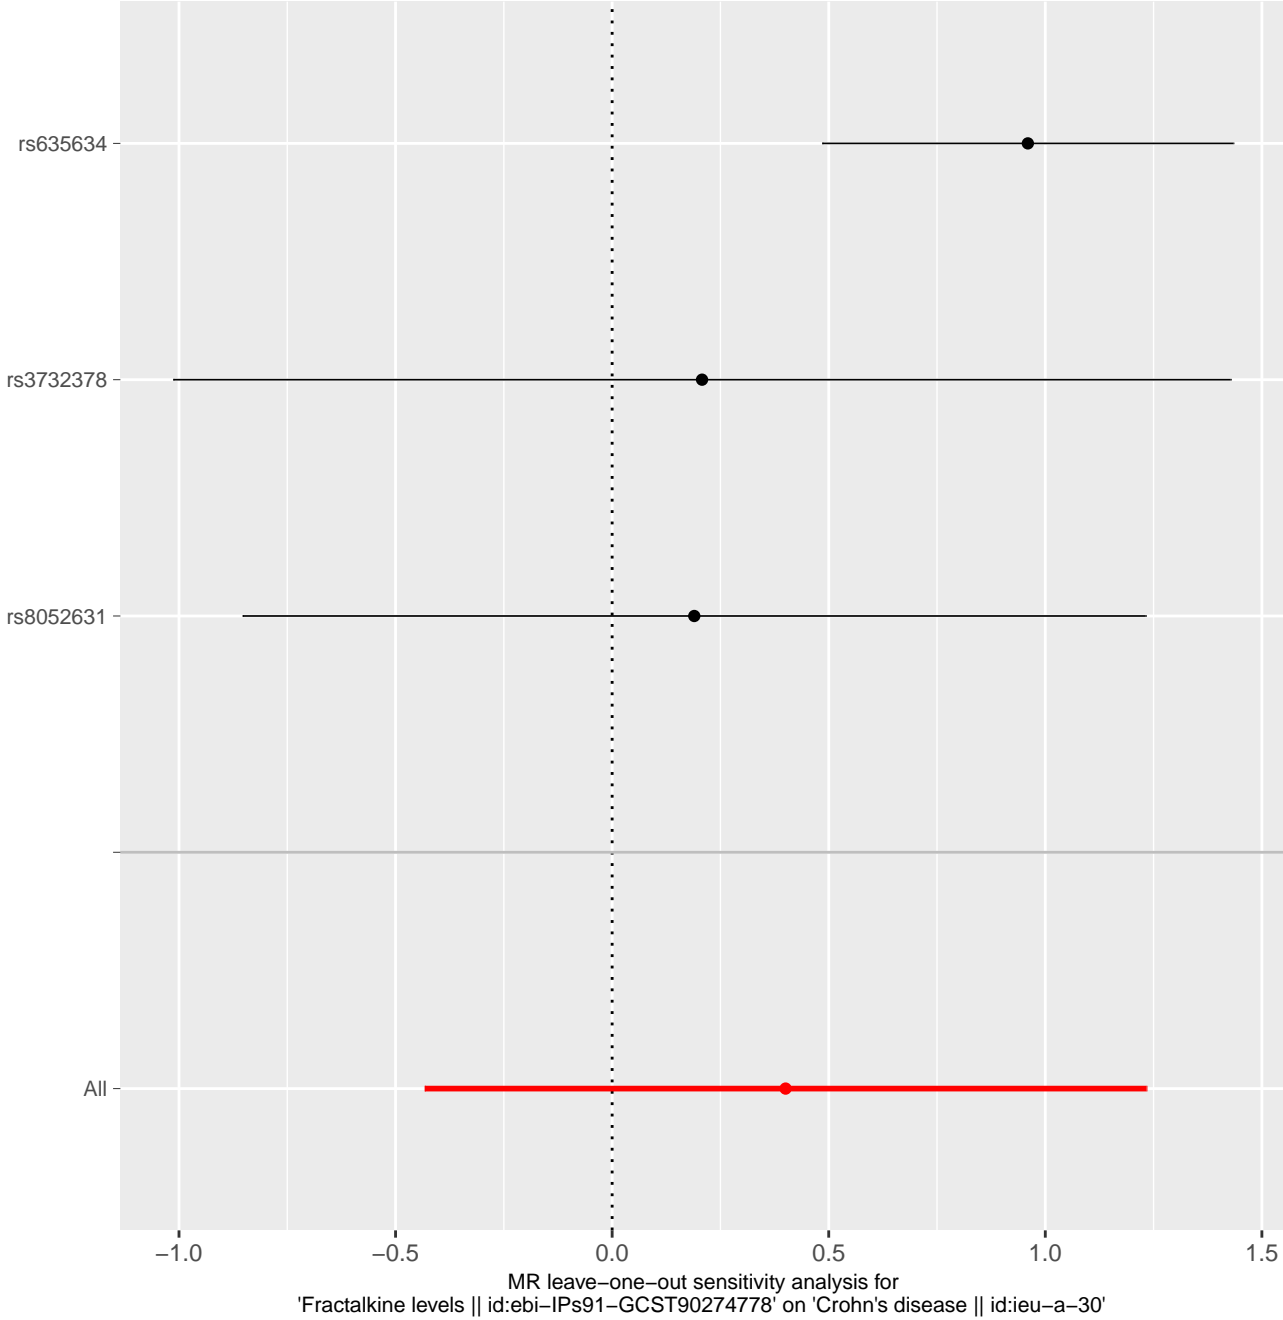

rs635634

rs8052631

rs3732378

All

-0.4

0.0

0.4

MR leave-one-out sensitivity analysis for  
'Fractalkine levels || id:ebi-IPs91-GCST90274778' on 'Ulcerative colitis || id:ieu-a-32'

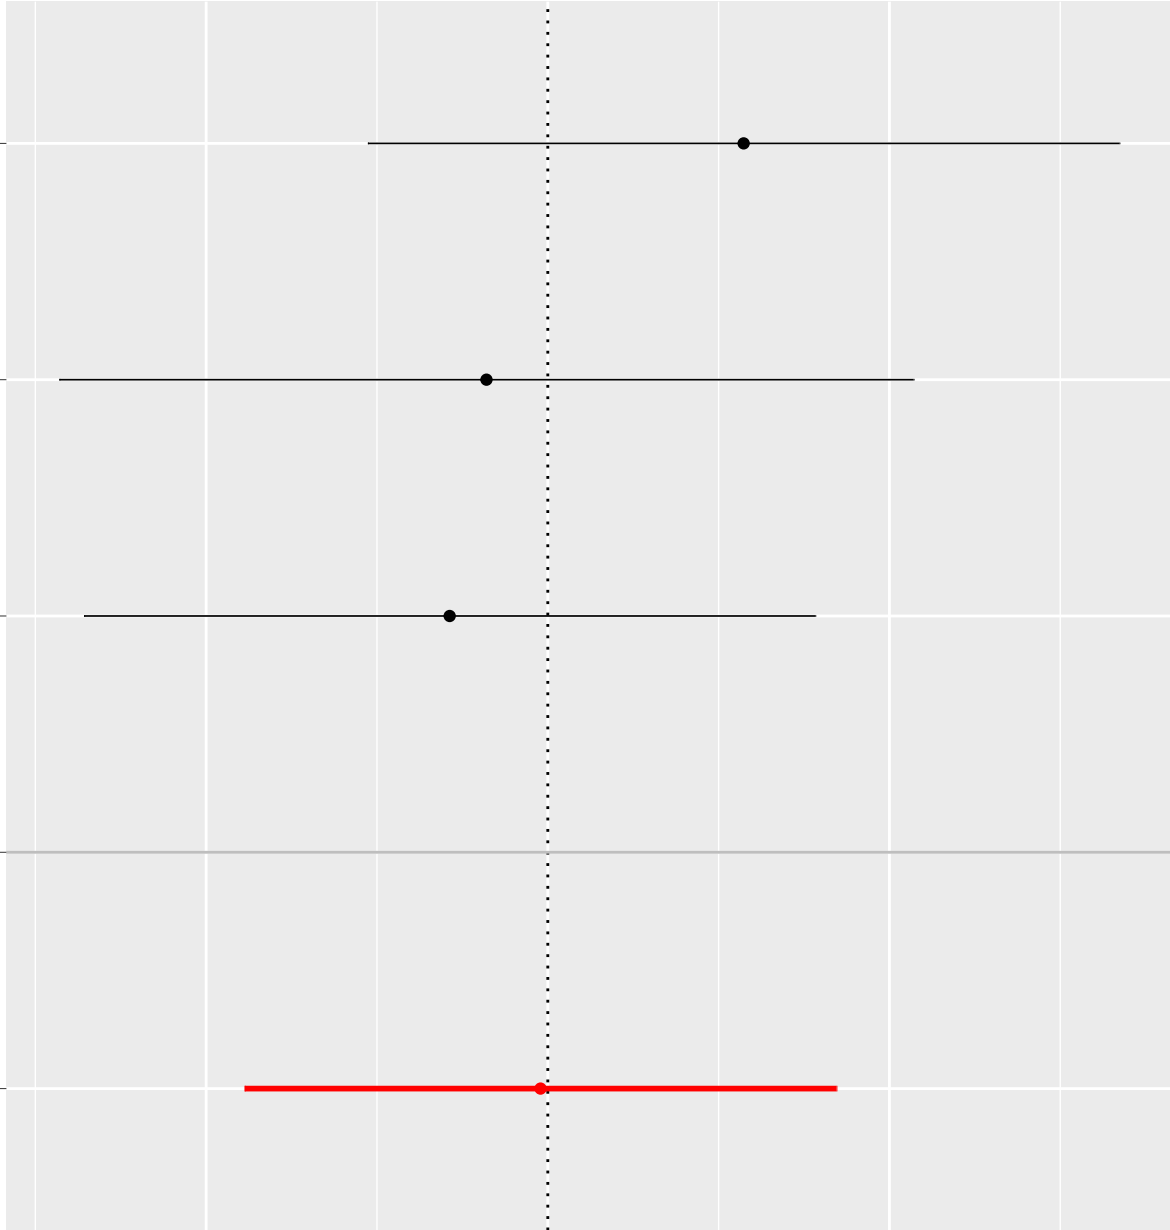



rs12646113

rs72651343

rs115140093

All

-0.6

-0.4

-0.2

0.0

MR leave-one-out sensitivity analysis for

'C-X-C motif chemokine 10 levels || id:ebi-IPs91-GCST90274780' on 'Crohn's disease || id:ieu-a-30'

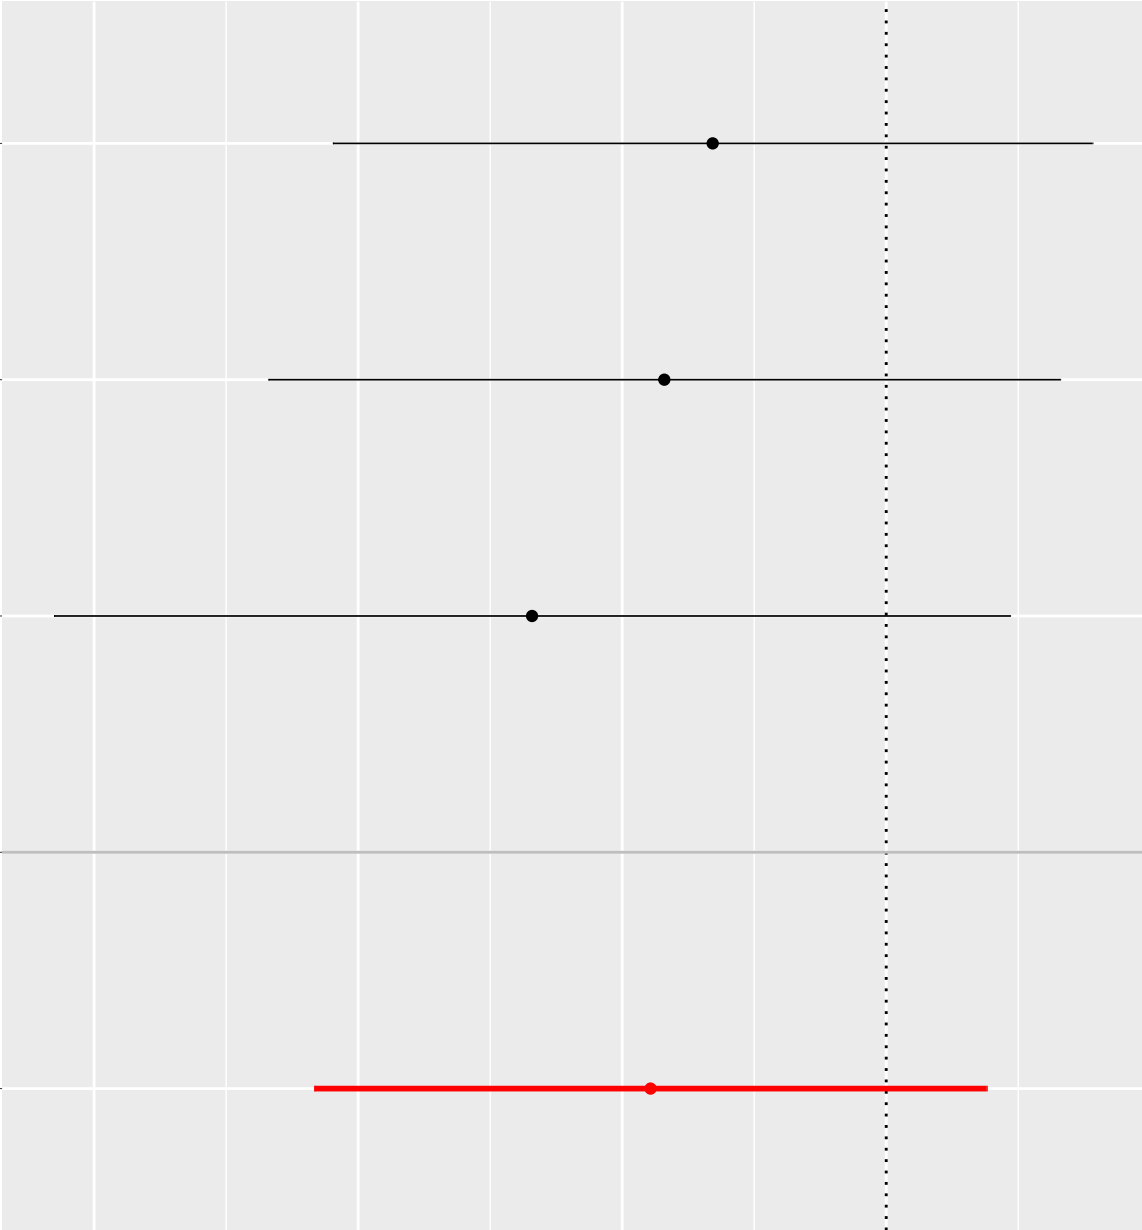

rs72651343

rs115140093

rs12646113

All

-0.2

0.0

0.2

MR leave-one-out sensitivity analysis for  
'C-X-C motif chemokine 10 levels || id:ebi-IPs91-GCST90274780' on 'Ulcerative colitis || id:ieu-a-32'

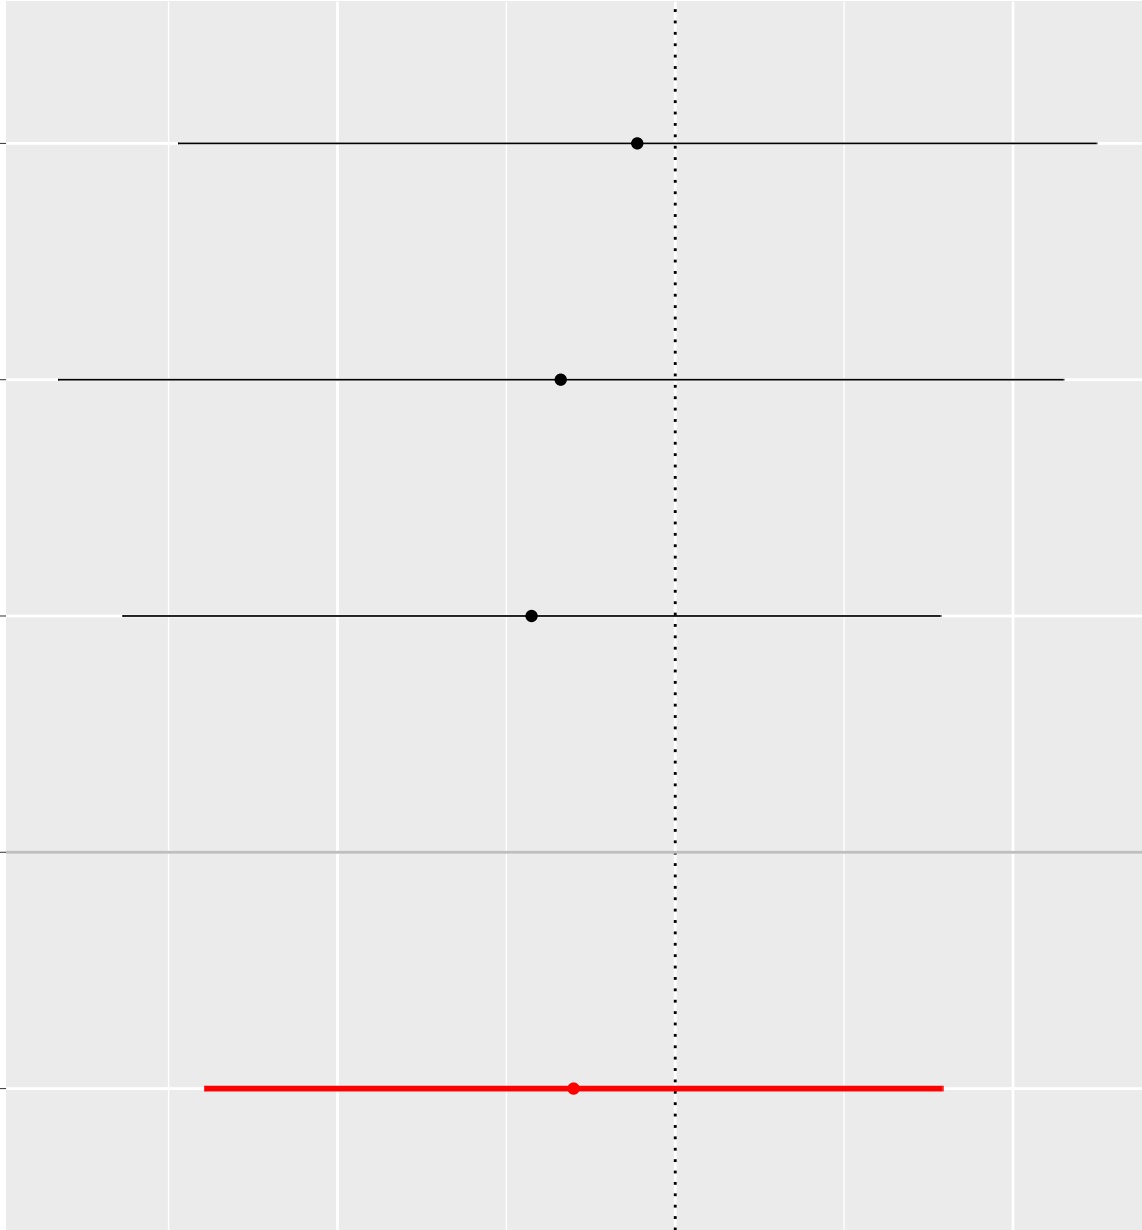

rs75612655

rs10733789

rs6827617

All

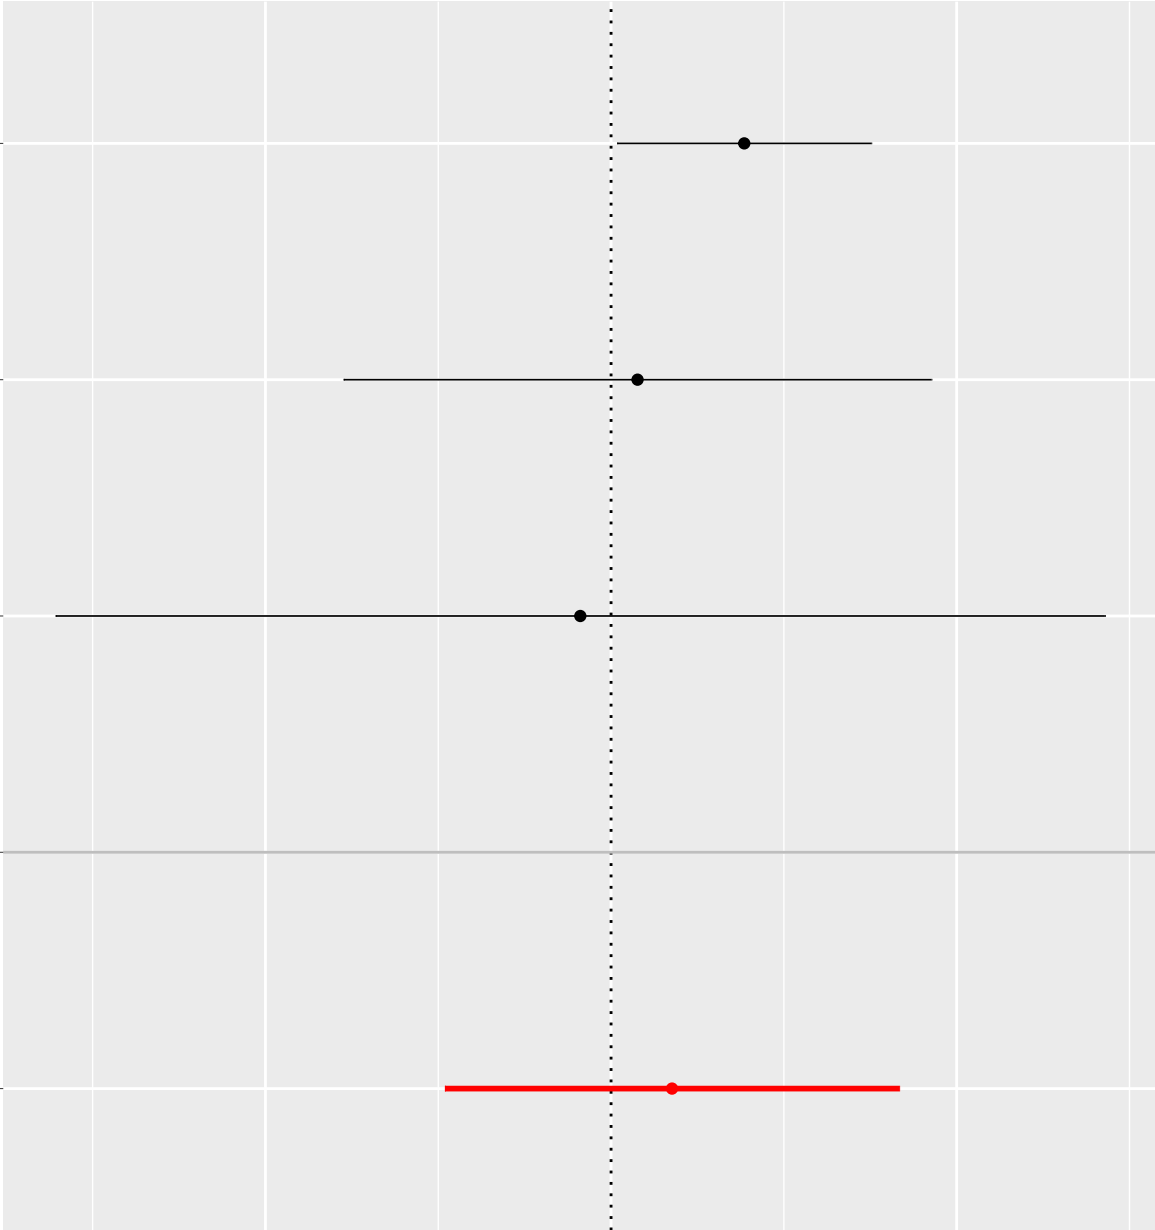

MR leave-one-out sensitivity analysis for 'C-X-C motif chemokine 11 levels || id:ebi-IPs91-GCST90274781' on 'Crohn's disease || id:ieu-a-30'

rs75612655

rs10733789

rs6827617

All

-0.25

0.00

0.25

0.50

MR leave-one-out sensitivity analysis for  
'C-X-C motif chemokine 11 levels || id:ebi-IPs91-GCST90274781' on 'Ulcerative colitis || id:ieu-a-32'

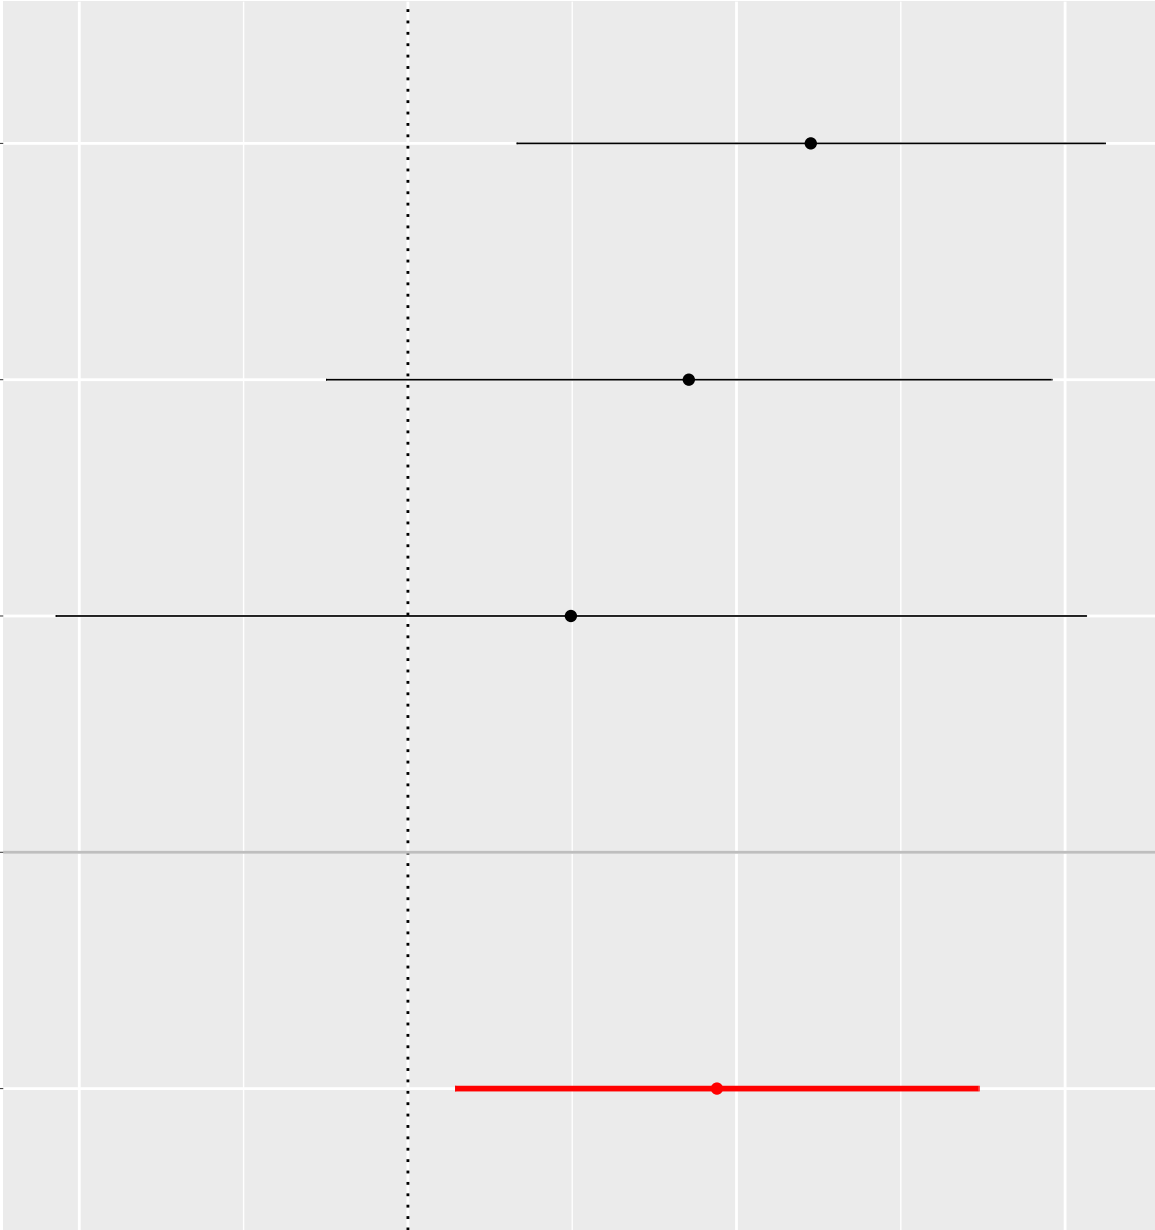

rs6993770

rs10821552

rs79649467

rs7636889

rs425535

All

-0.50

-0.25

0.00

0.25

MR leave-one-out sensitivity analysis for

'C-X-C motif chemokine 5 levels || id:ebi-IPs91-GCST90274782' on 'Crohn's disease || id:ieu-a-30'

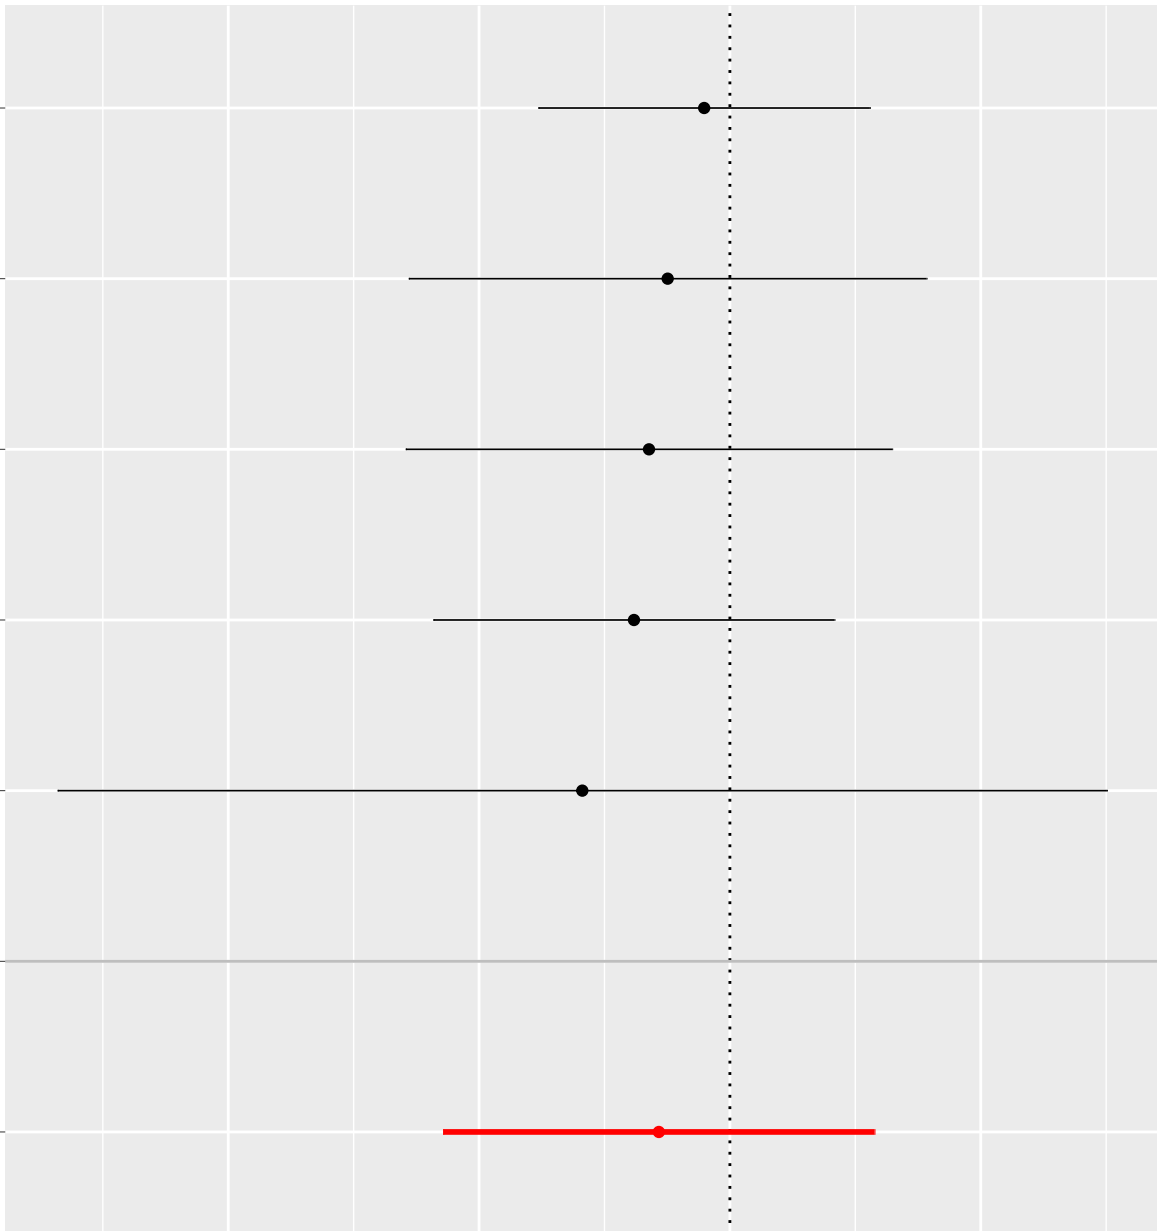

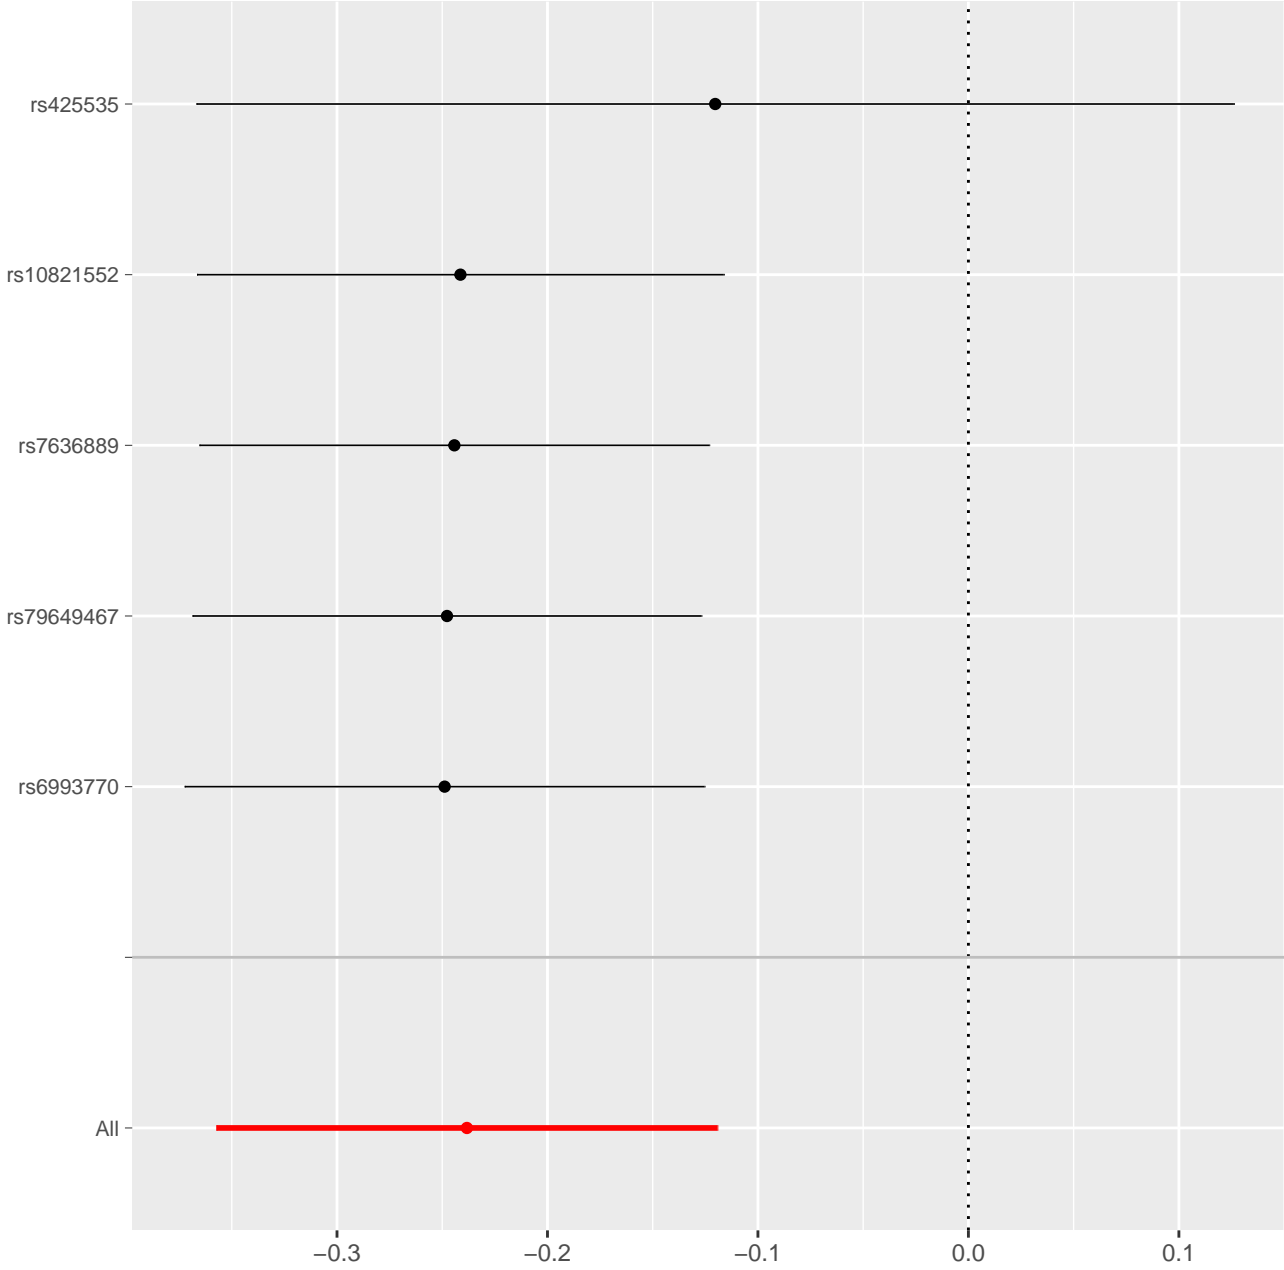

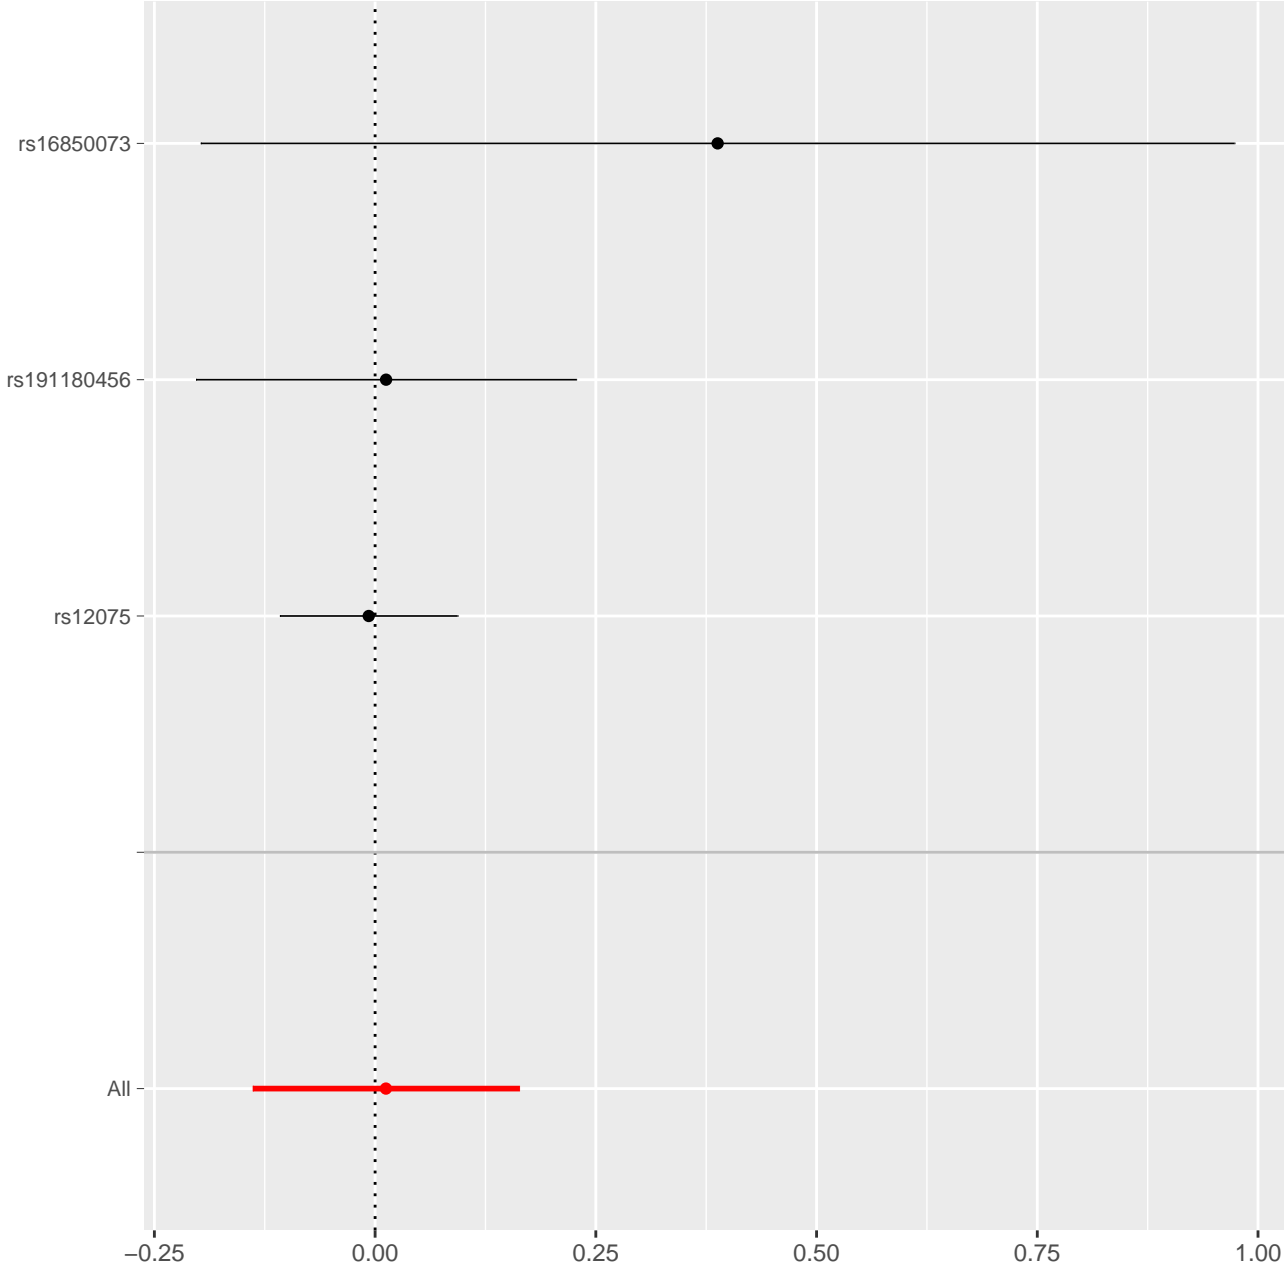

MR leave-one-out sensitivity analysis for 'C-X-C motif chemokine 6 levels || id:ebi-IPs91-GCST90274783' on 'Crohn's disease || id:ieu-a-30'

rs16850073

rs191180456

rs12075

All

0.0

0.2

0.4

0.6

MR leave-one-out sensitivity analysis for  
'C-X-C motif chemokine 6 levels || id:ebi-IPs91-GCST90274783' on 'Ulcerative colitis || id:ieu-a-32'

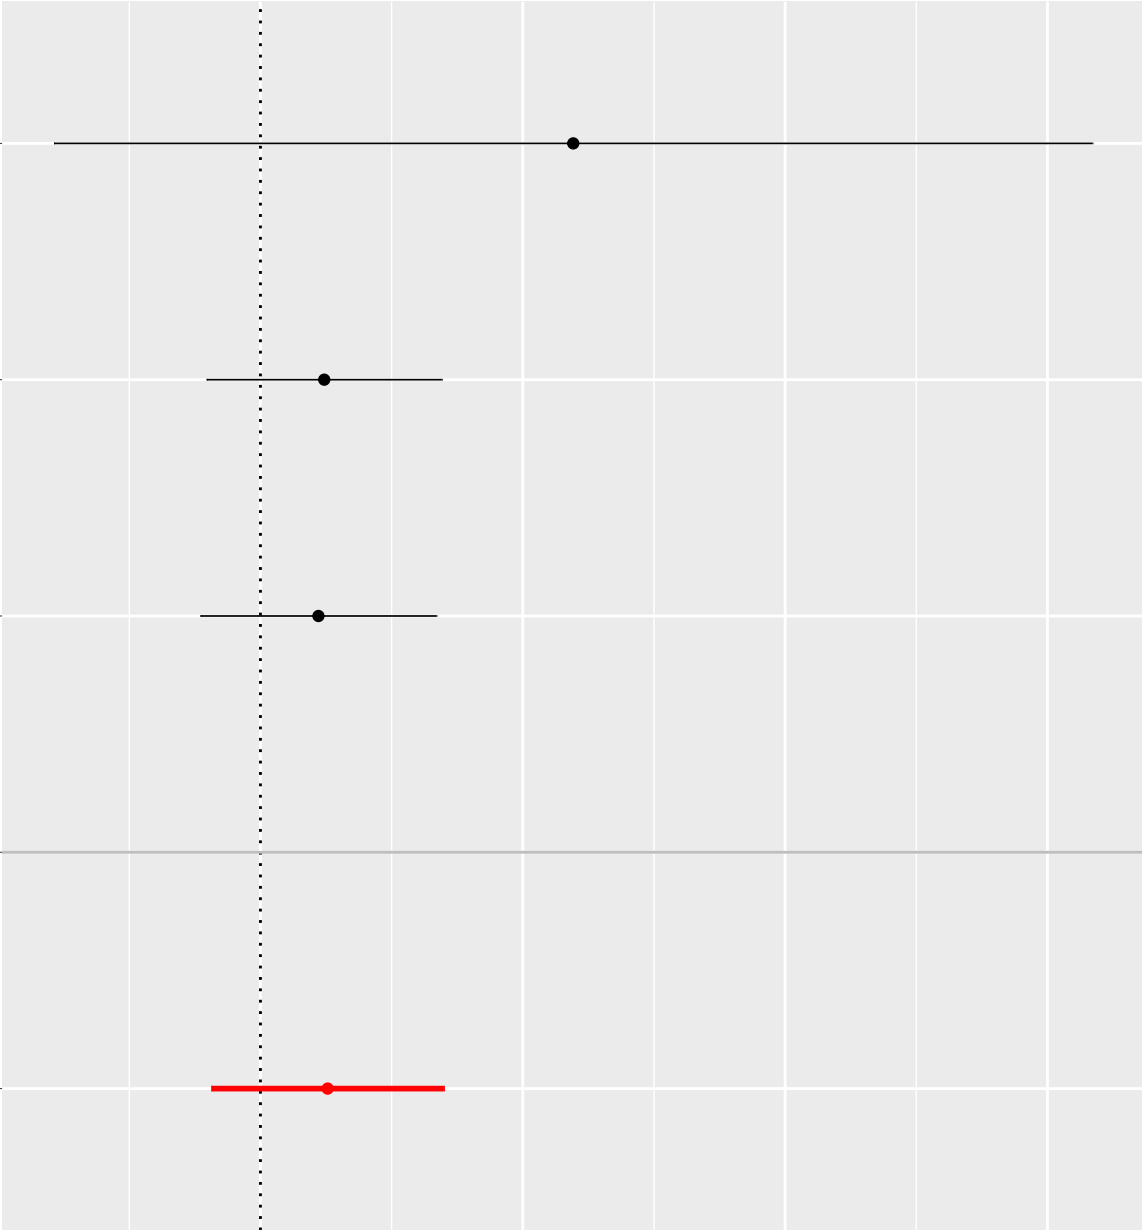



rs12191307

rs4241577

rs783149

All

0.0

0.3

0.6

0.9

MR leave-one-out sensitivity analysis for  
'C-X-C motif chemokine 9 levels || id:ebi-IPs91-GCST90274784' on 'Crohn's disease || id:ieu-a-30'

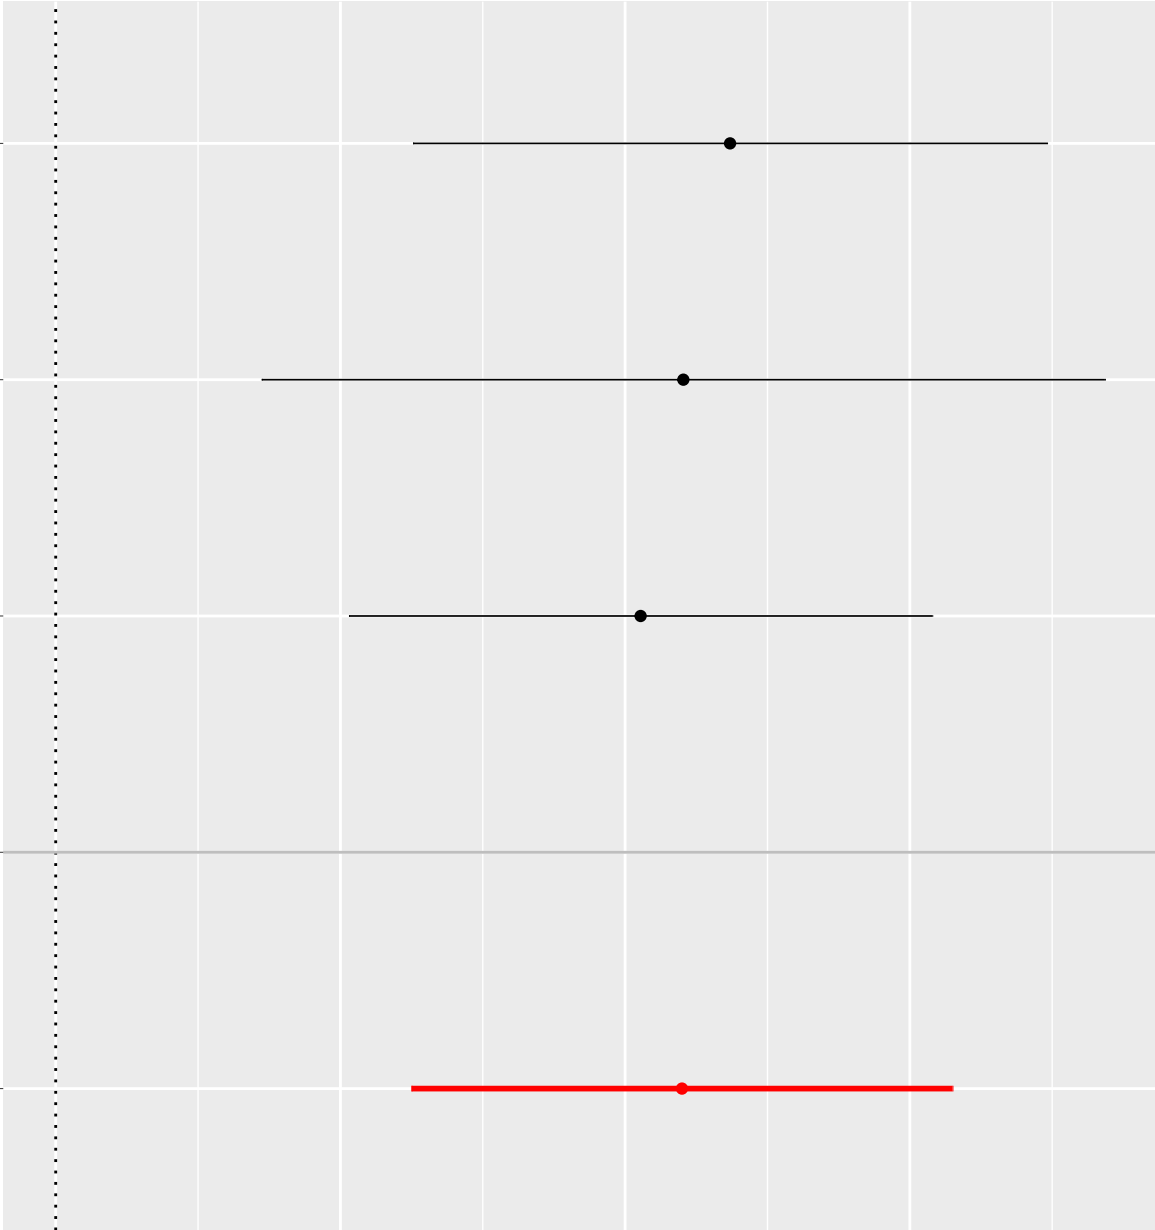

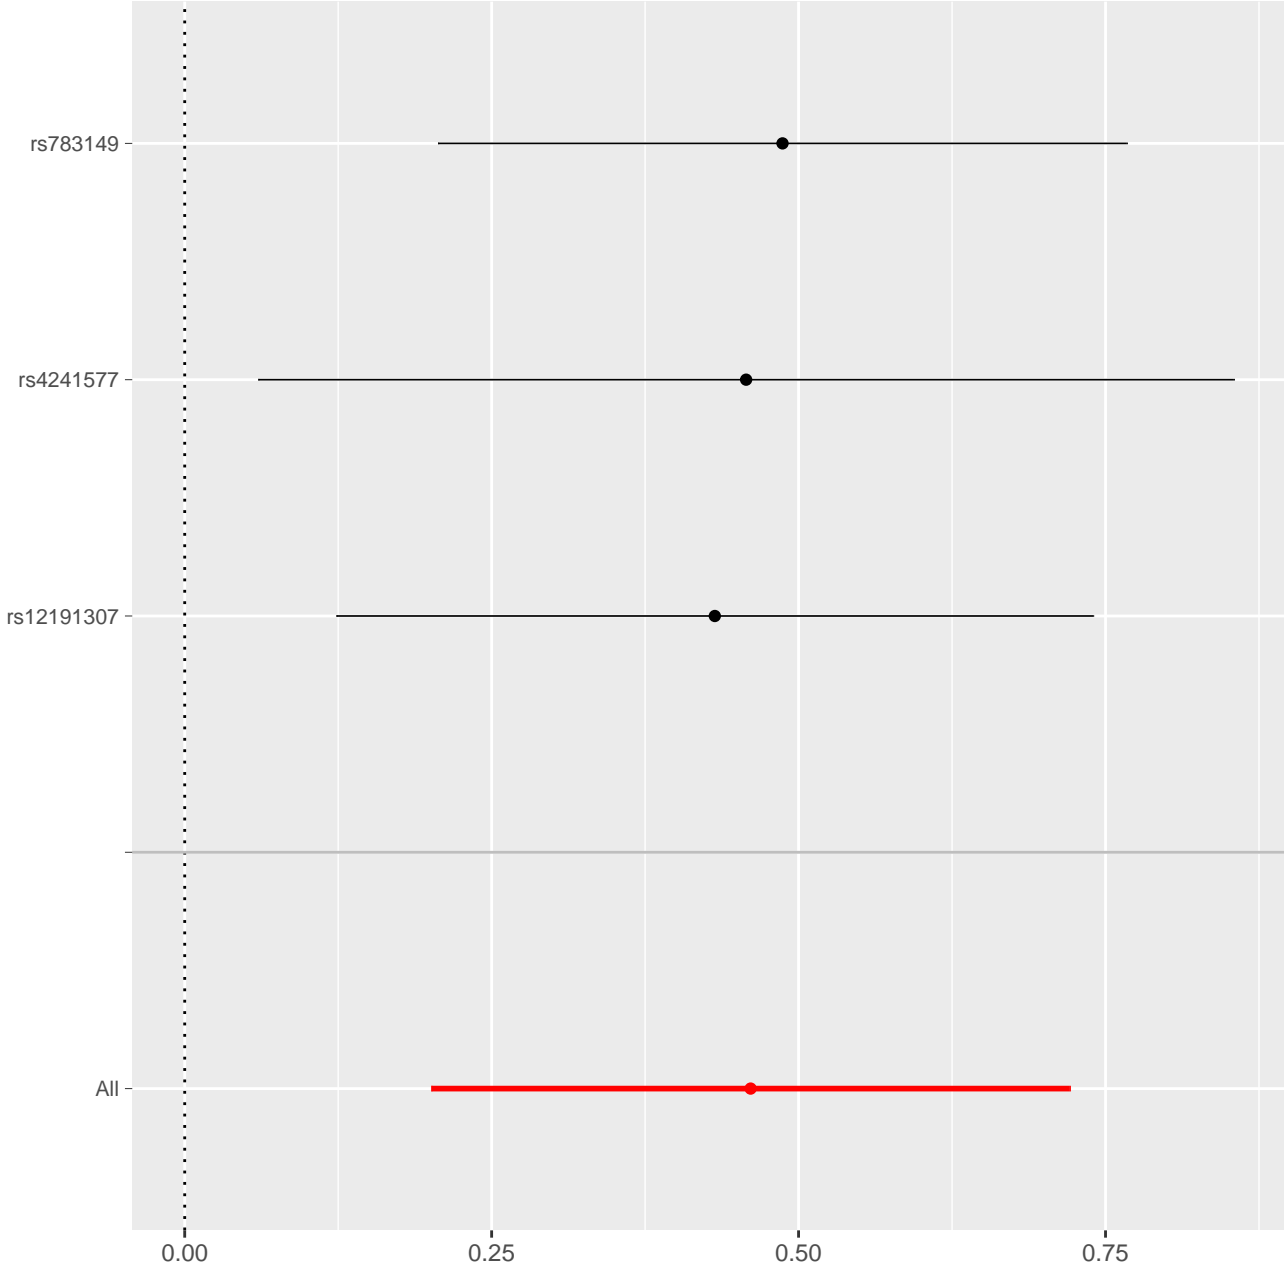

MR leave-one-out sensitivity analysis for 'C-X-C motif chemokine 9 levels || id:ebi-IPs91-GCST90274784' on 'Ulcerative colitis || id:ieu-a-32'

rs35032874

rs62193248

rs6517655

rs207671

All

-0.25

0.00

0.25

0.50

MR leave-one-out sensitivity analysis for

'Delta and Notch-like epidermal growth factor-related receptor levels || id:ebi-IPs91-GCST90274785' on 'Crohn's disease || id:iieu-

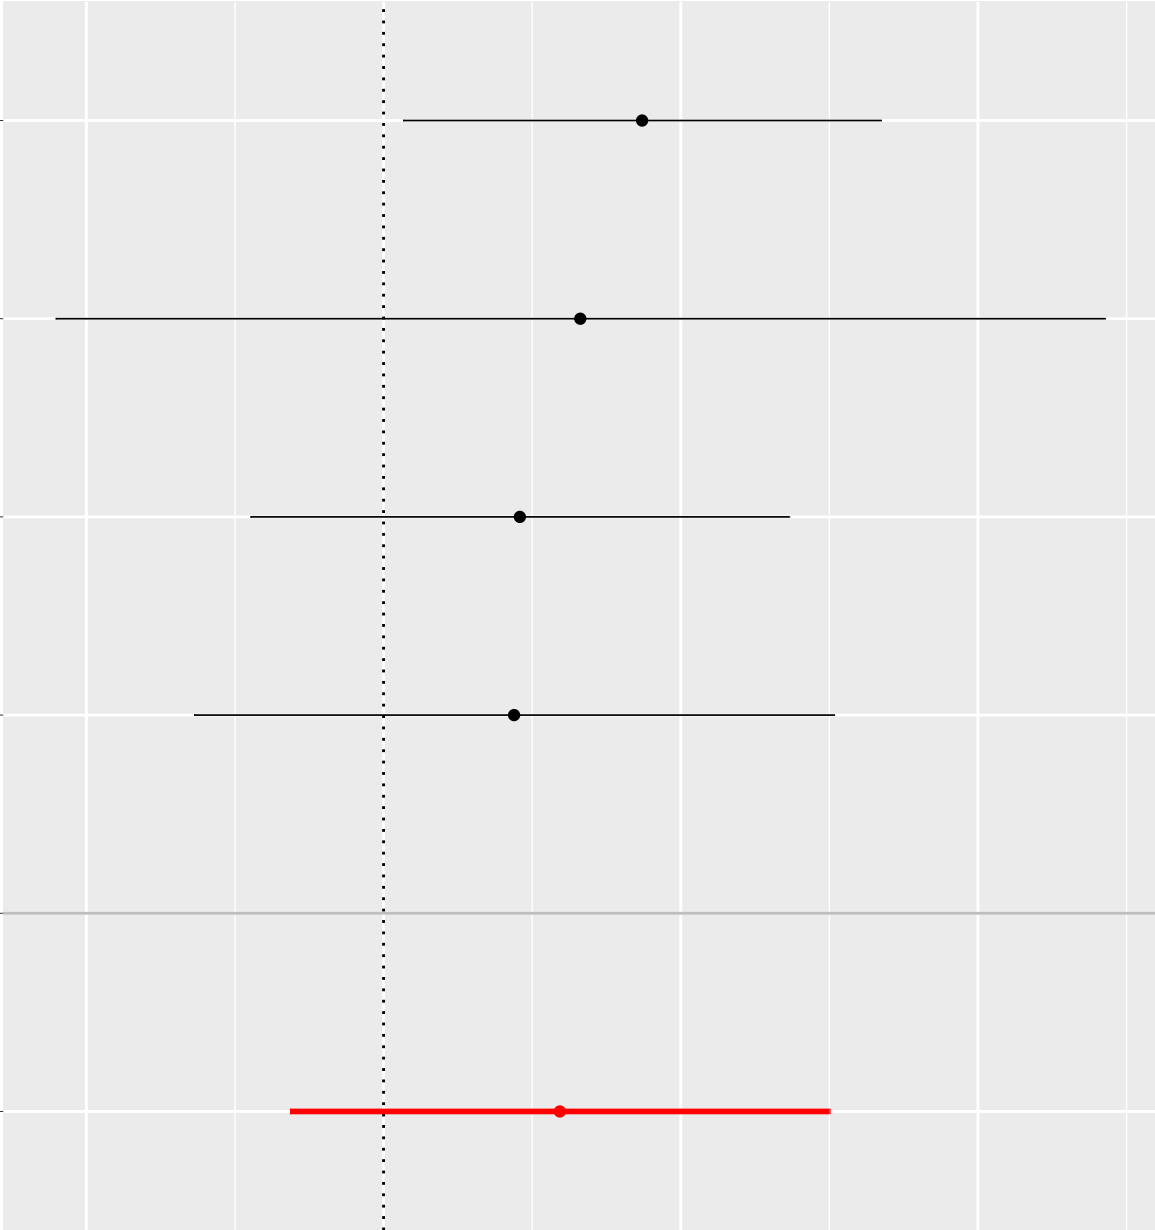

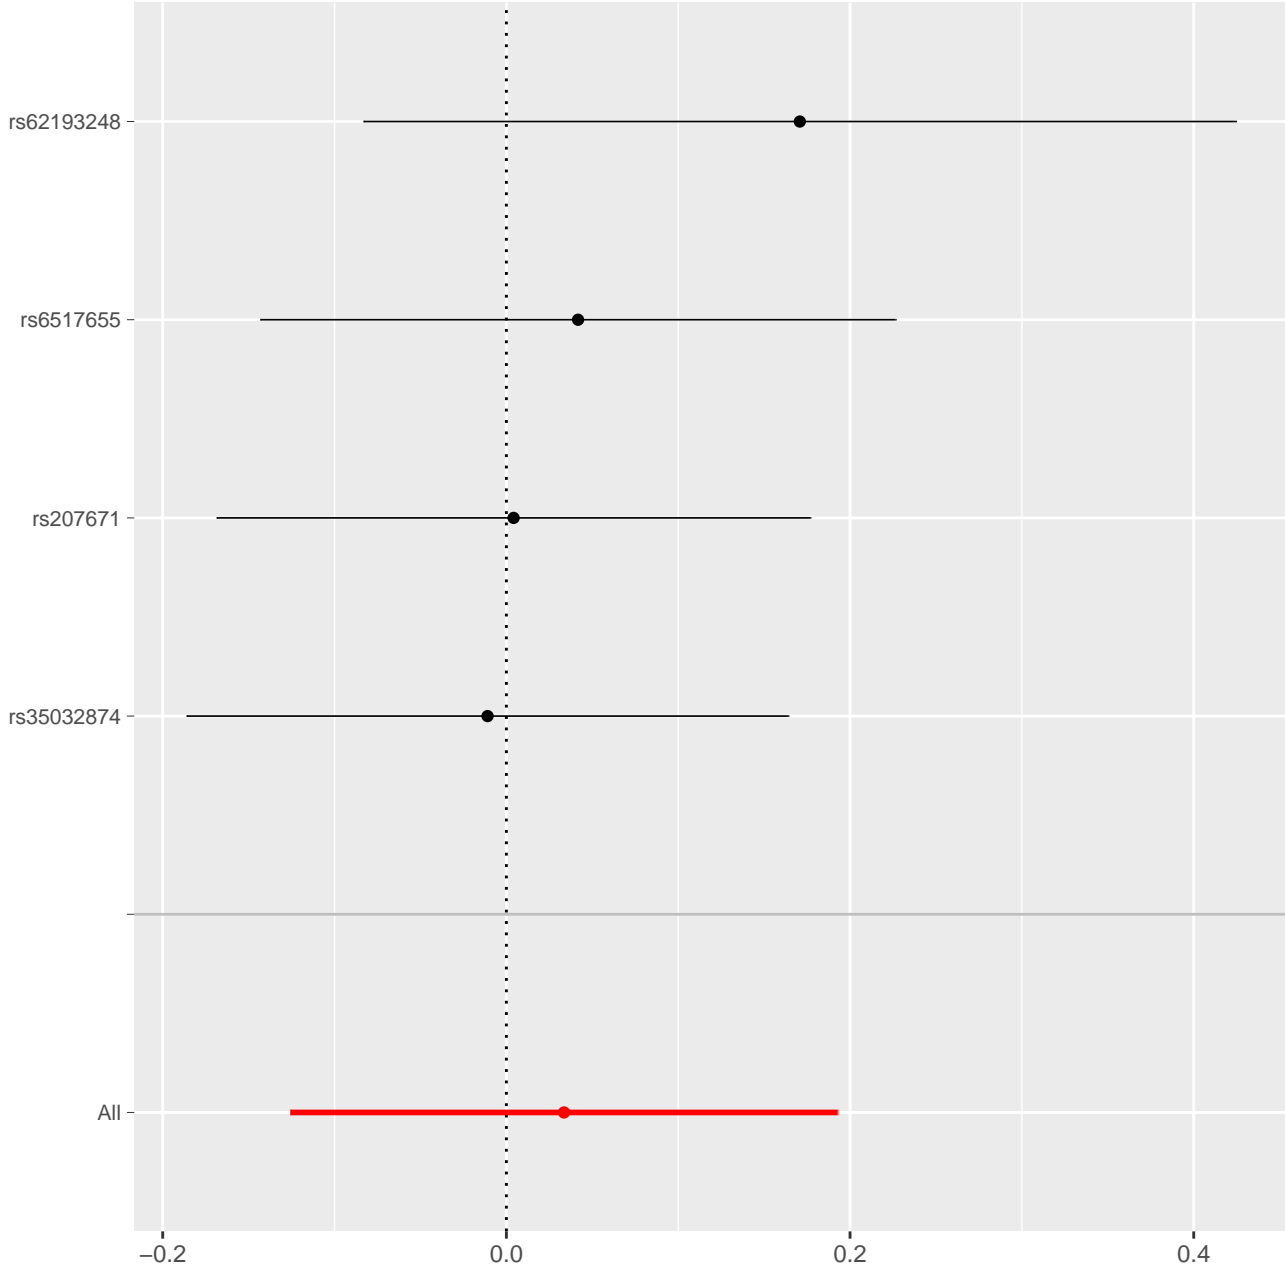

'Delta and Notch-like epidermal growth factor-related receptor levels || id:ebi-IPs91-GCST90274785' on 'Ulcerative colitis || id:iieu-

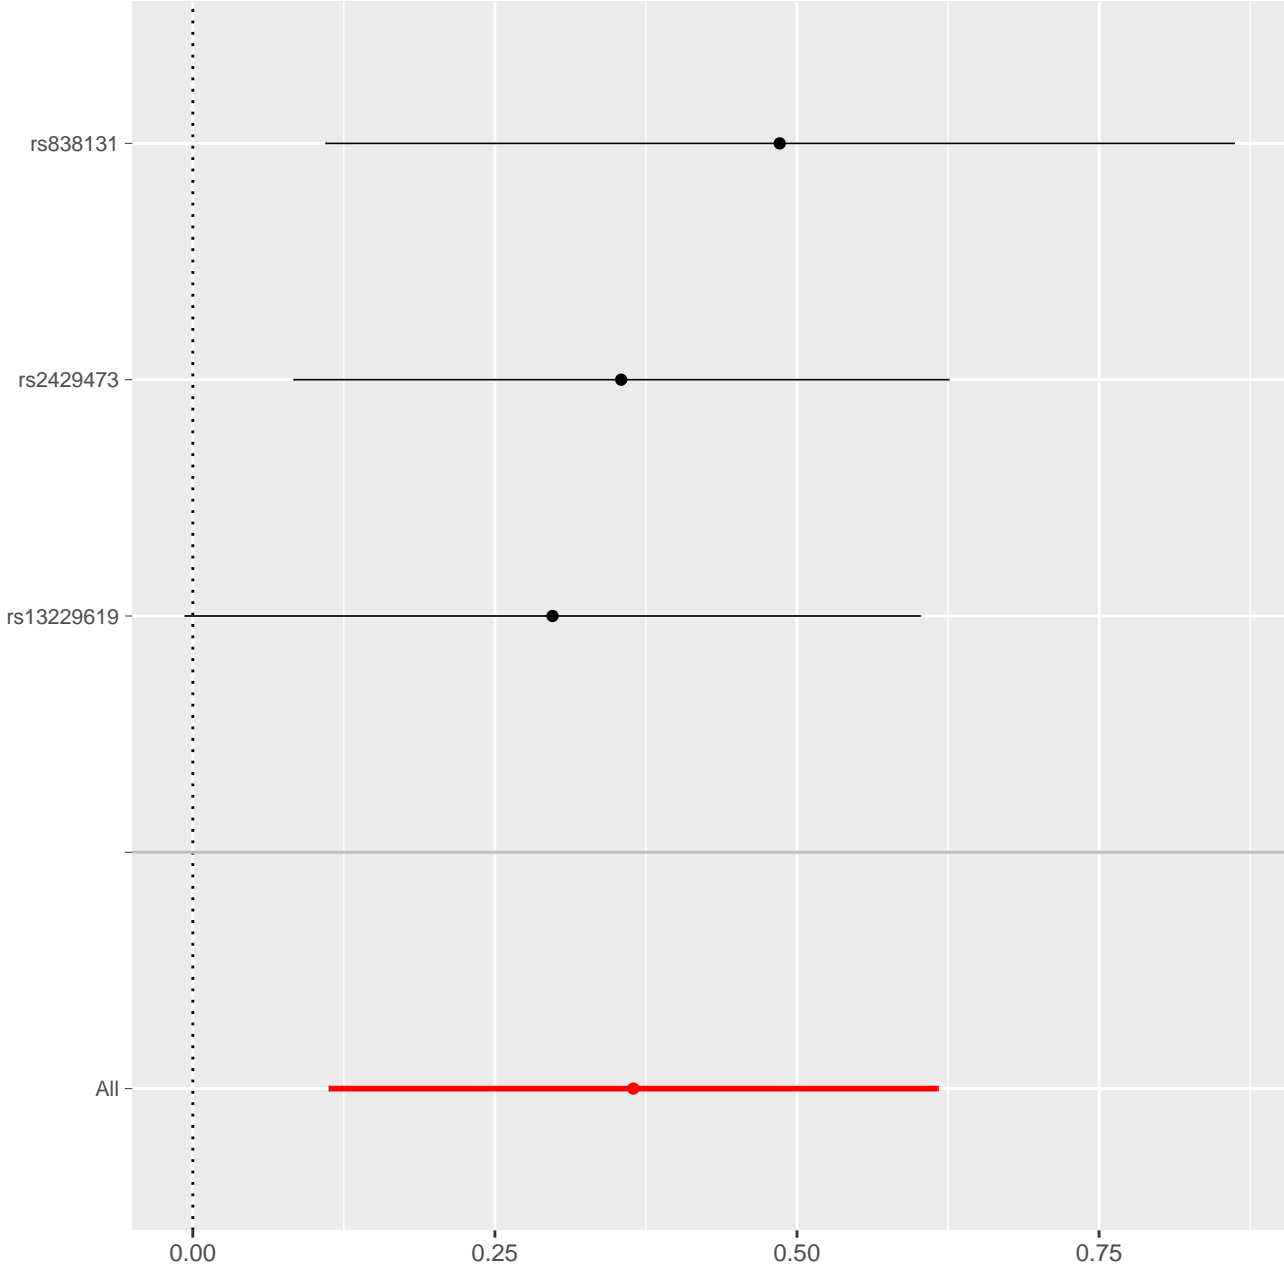

MR leave-one-out sensitivity analysis for 'Fibroblast growth factor 21 levels || id:ebi-IPs91-GCST90274788' on 'Crohn's disease || id:ieu-a-30'

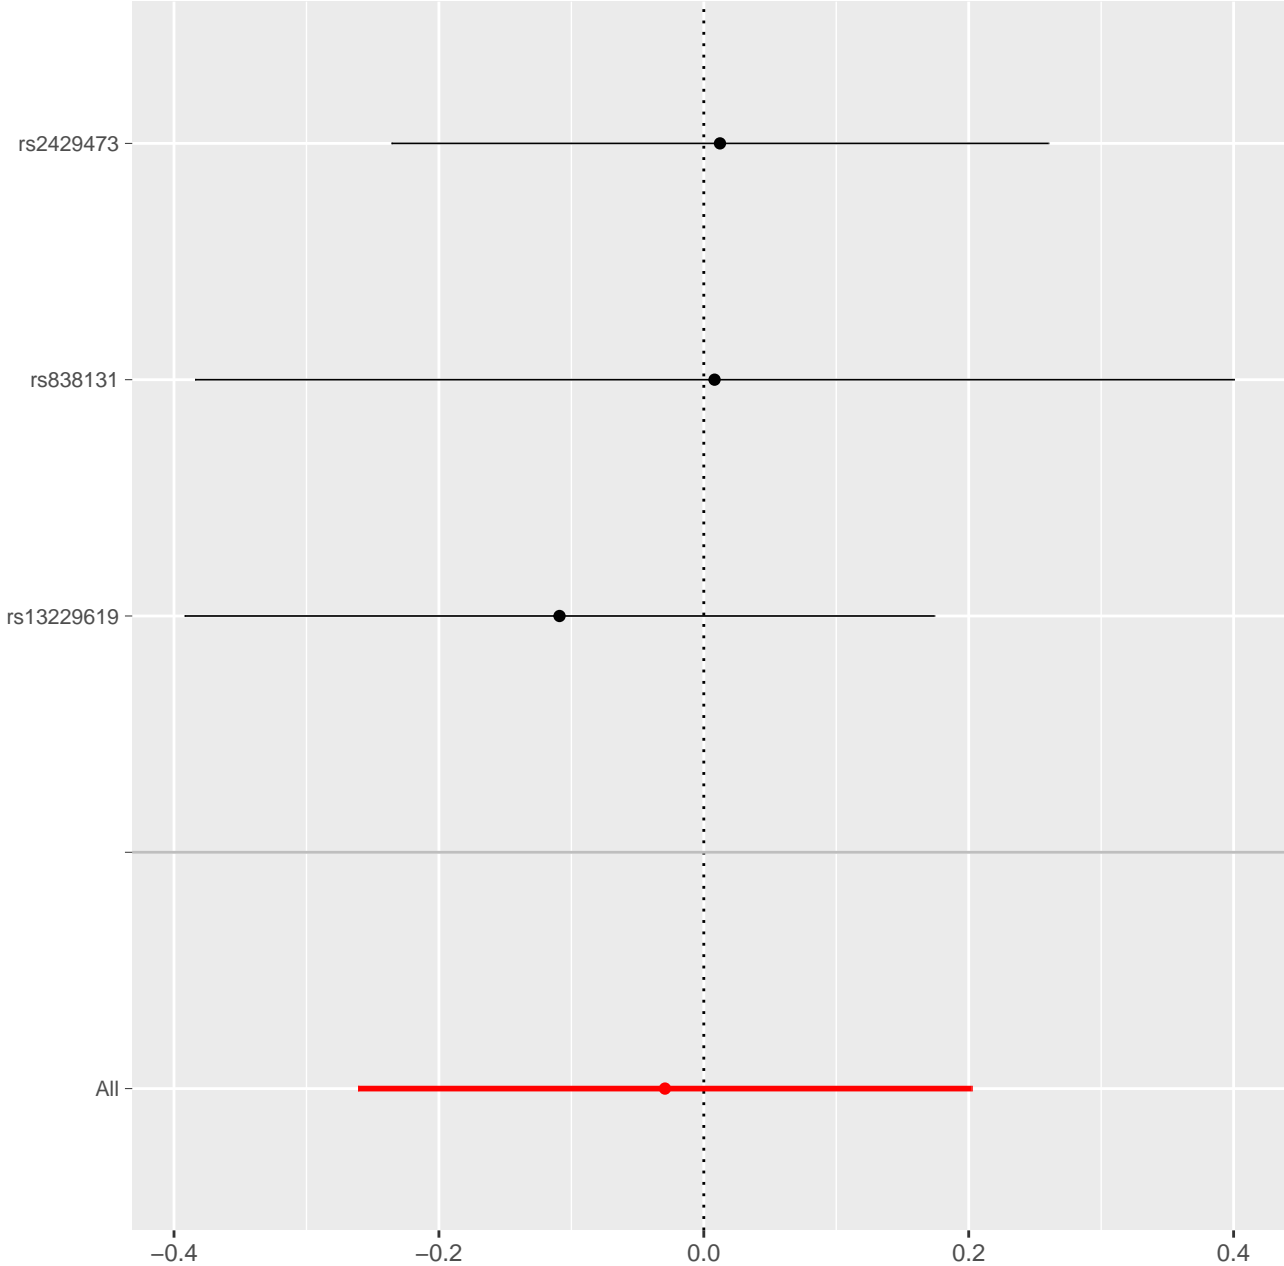

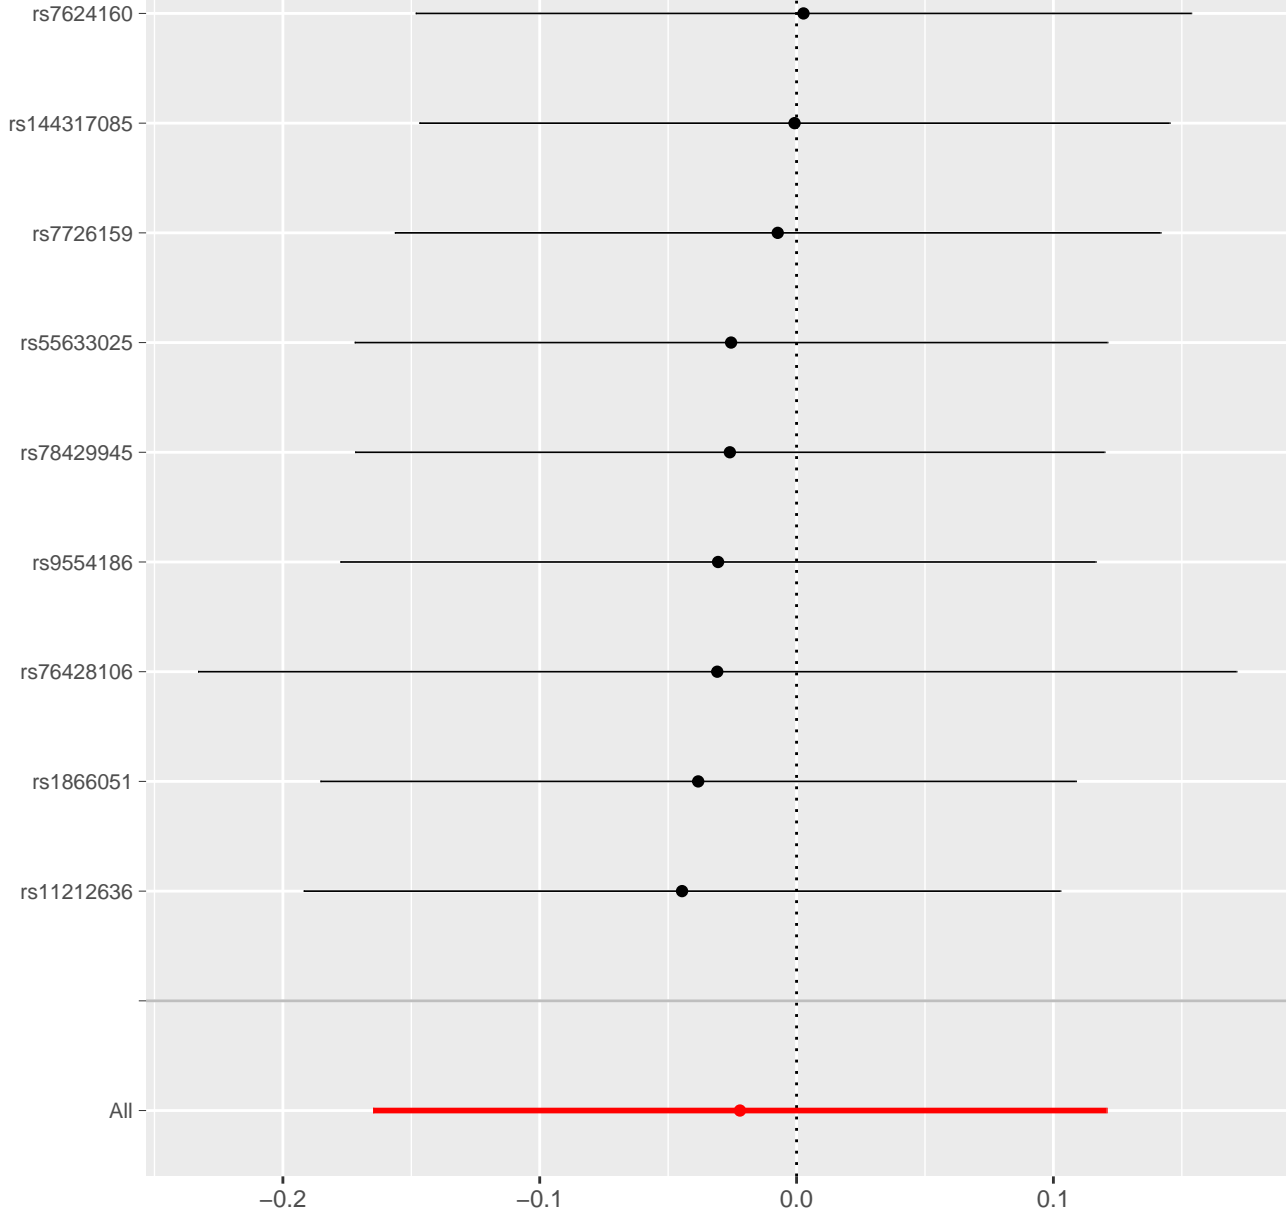

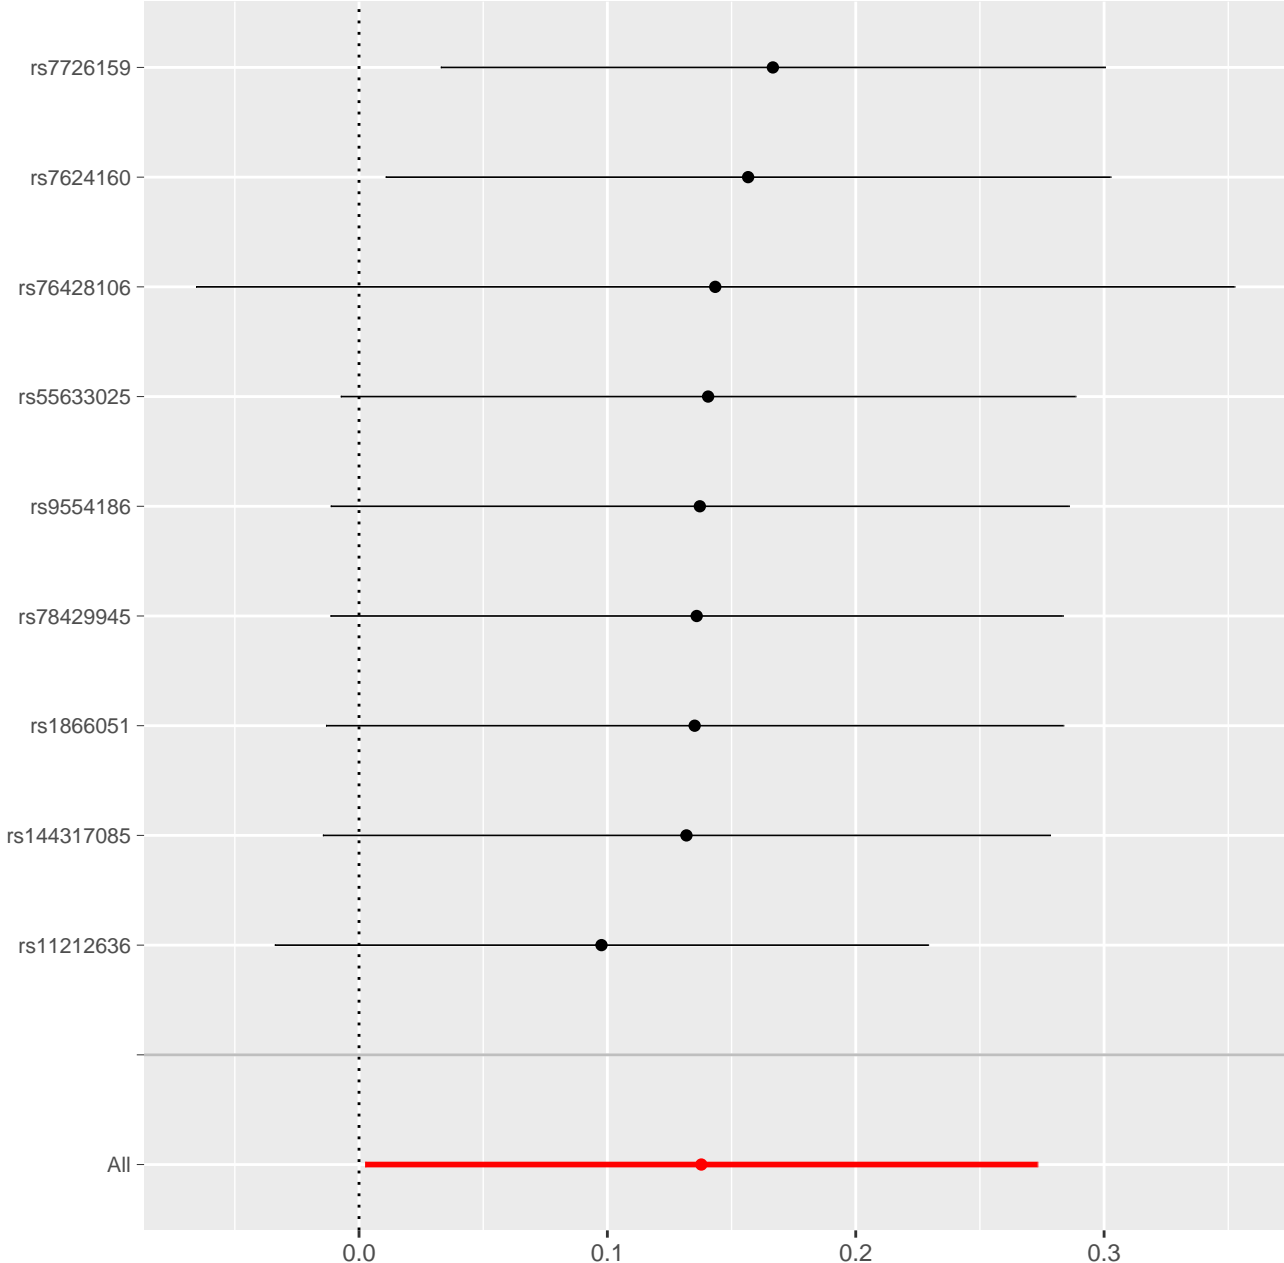



rs11740708

rs2453338

rs77671113

rs2194229

All

0.0

0.2

0.4

MR leave-one-out sensitivity analysis for

'Glial cell line-derived neurotrophic factor levels || id:ebi-IPs91-GCST90274792' on 'Crohn's disease || id:ieu-a-30'

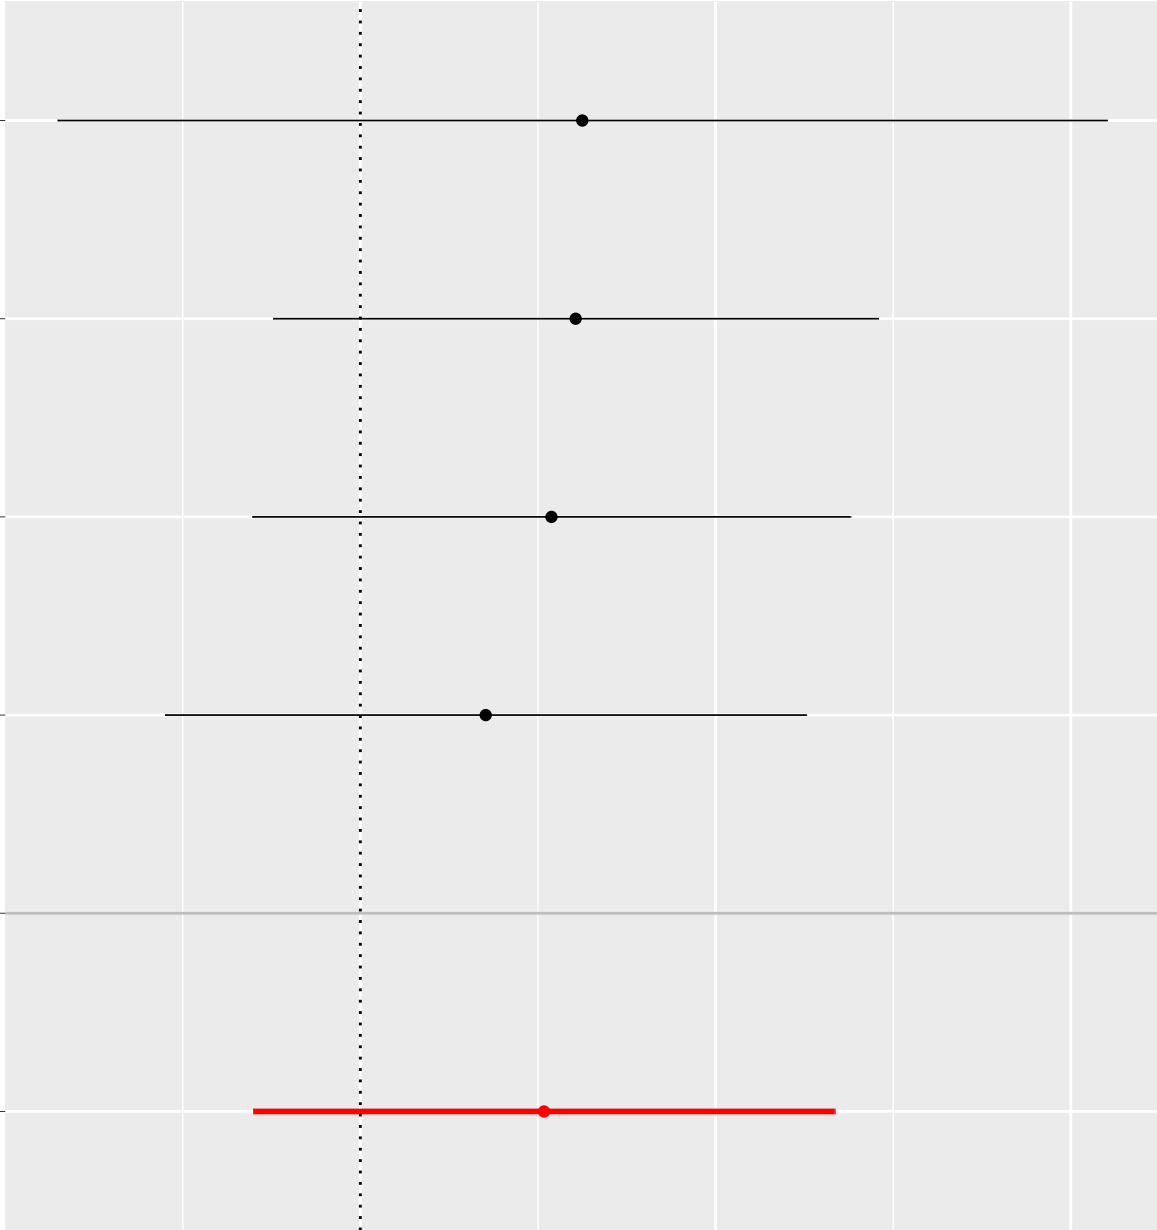

rs11740708

rs2194229

rs2453338

rs77671113

All

0.0

MR leave-one-out sensitivity analysis for

'Glial cell line-derived neurotrophic factor levels || id:ebi-IPs91-GCST90274792' on 'Ulcerative colitis || id:ieu-a-32'

0.4

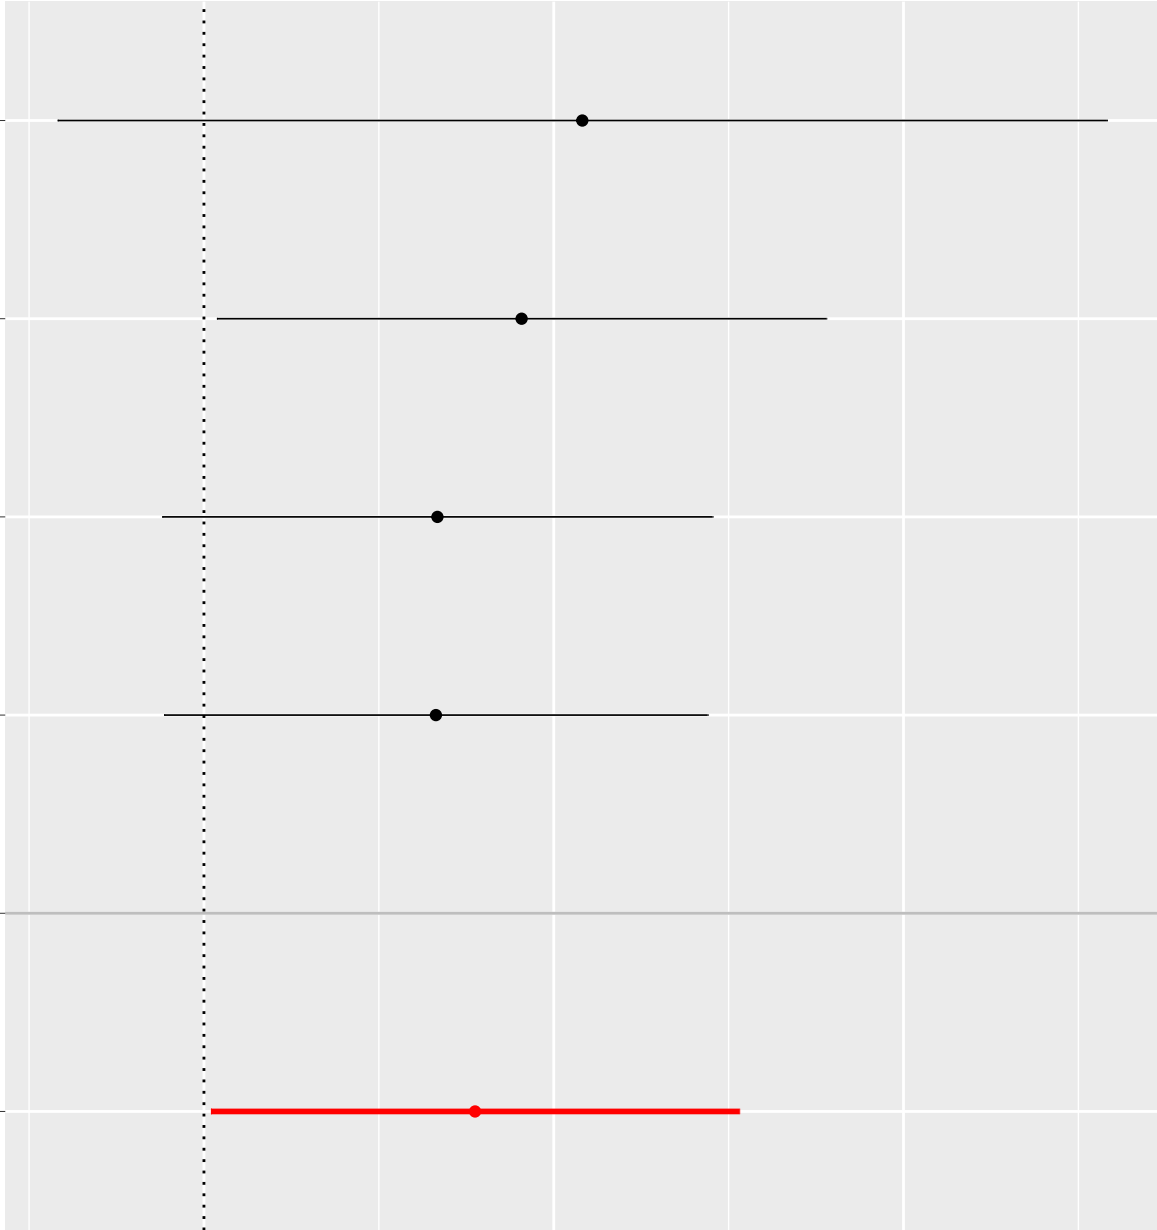

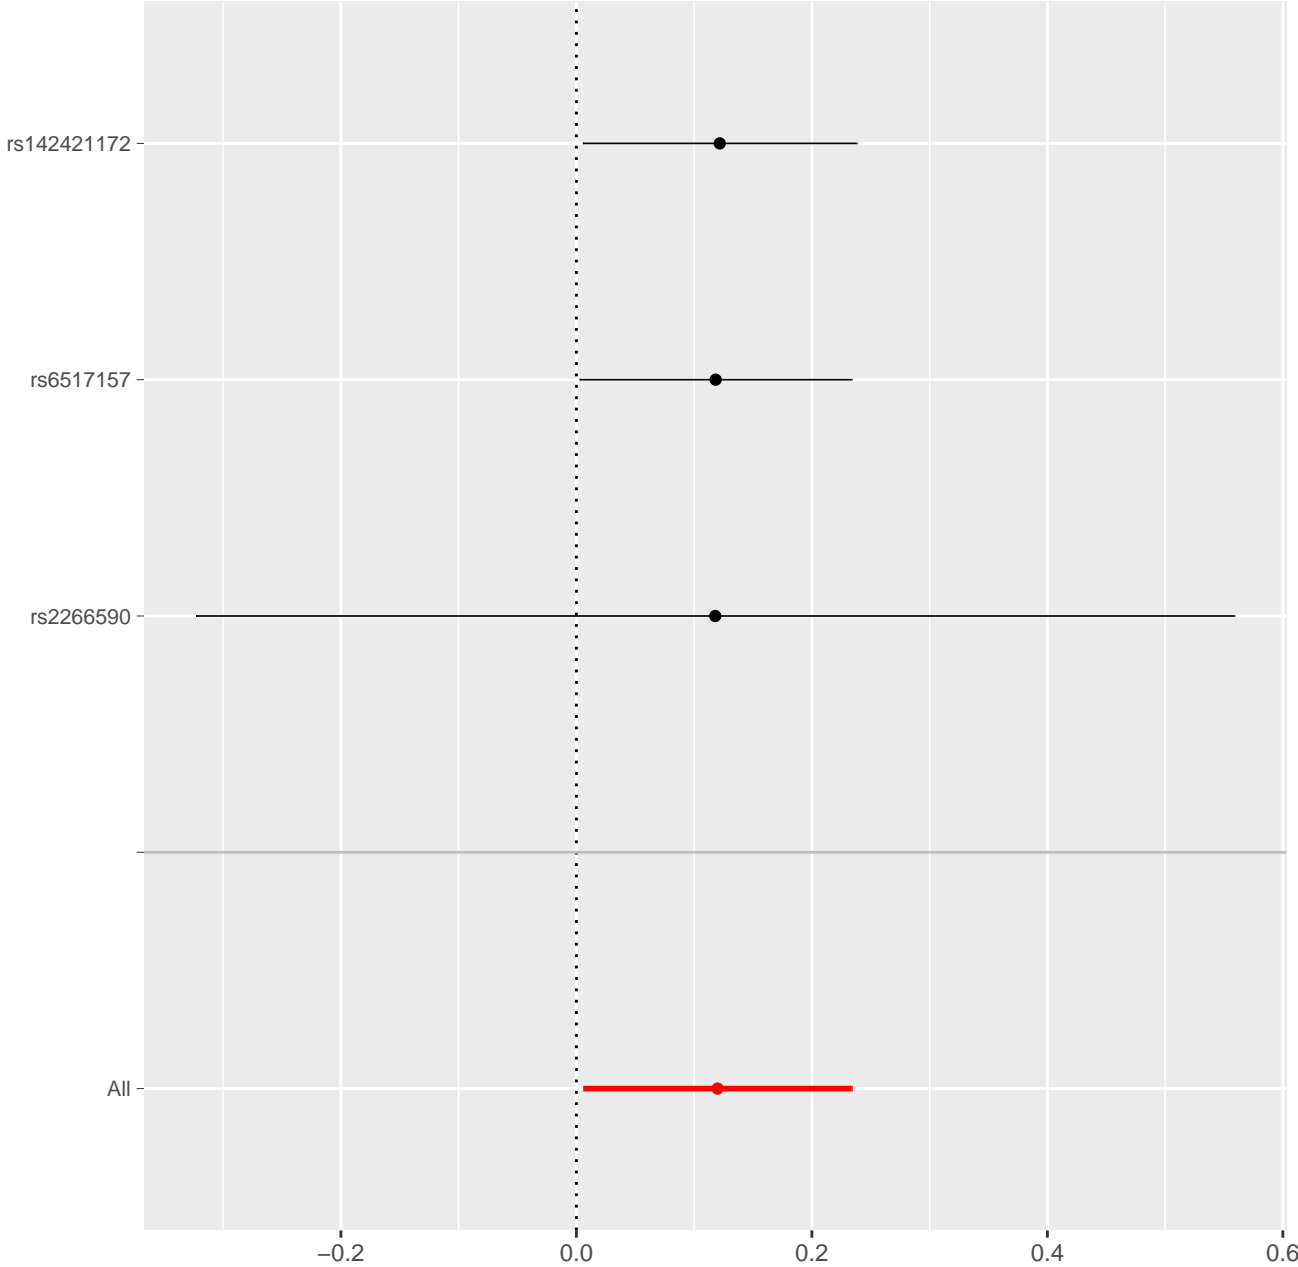

MR leave-one-out sensitivity analysis for 'Interleukin-10 receptor subunit beta levels || id:ebi-IPs91-GCST90274797' on 'Crohn's disease || id:ieu-a-30'

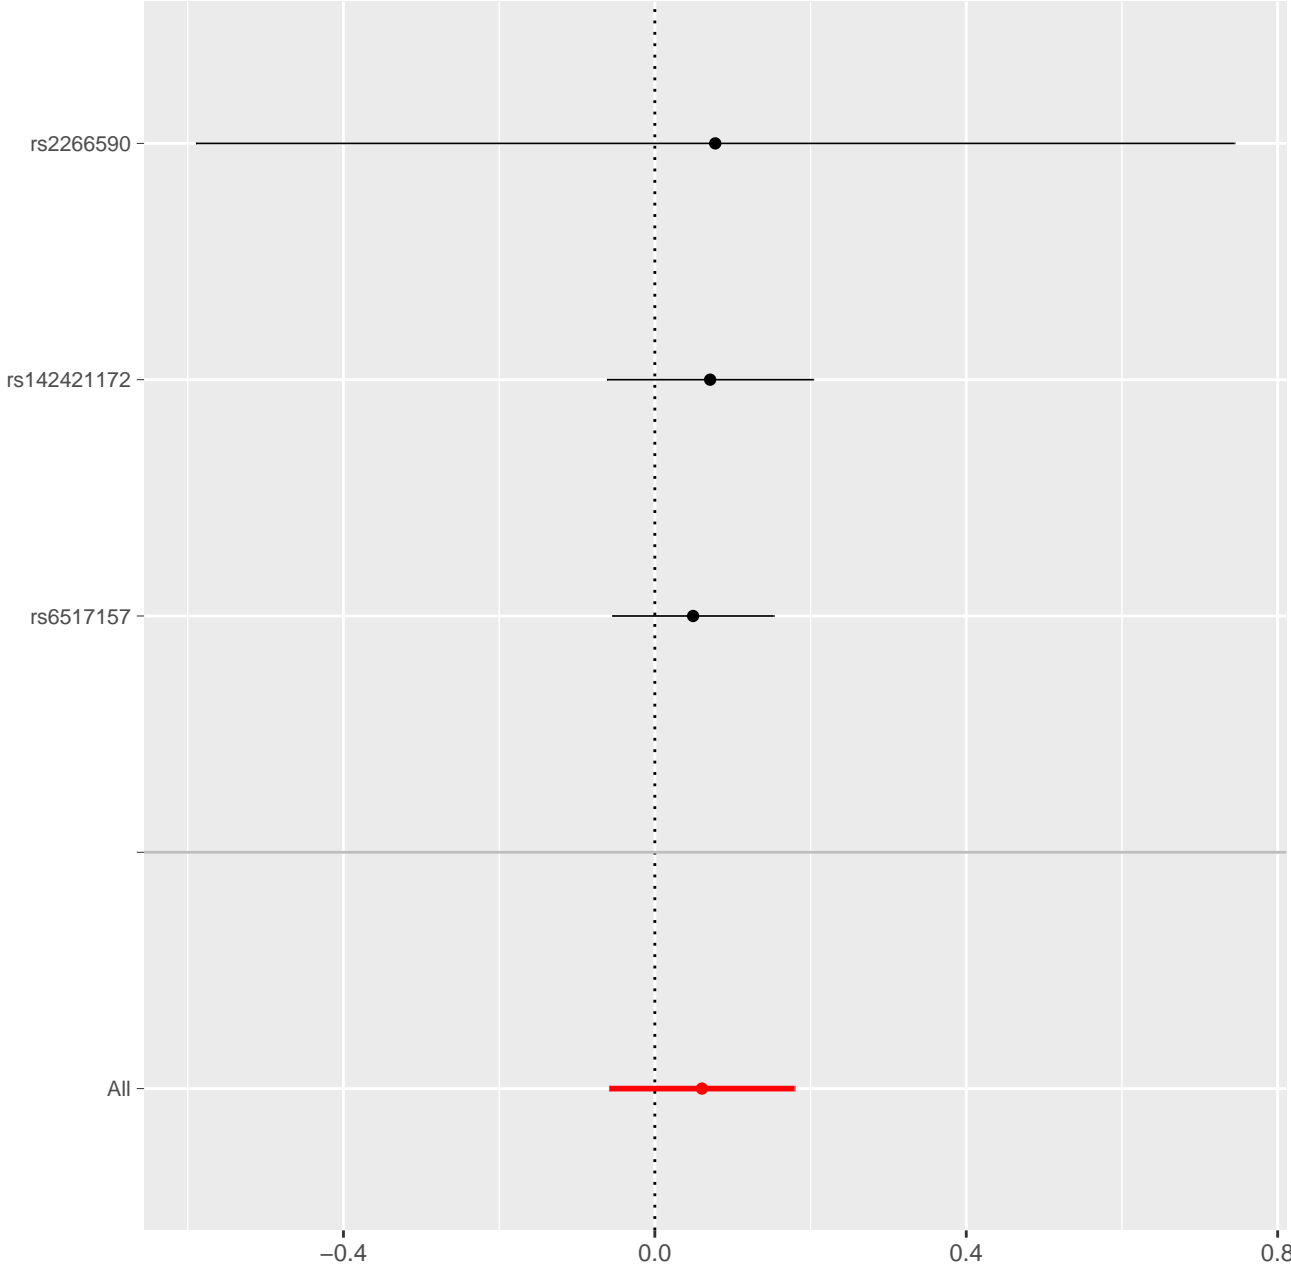

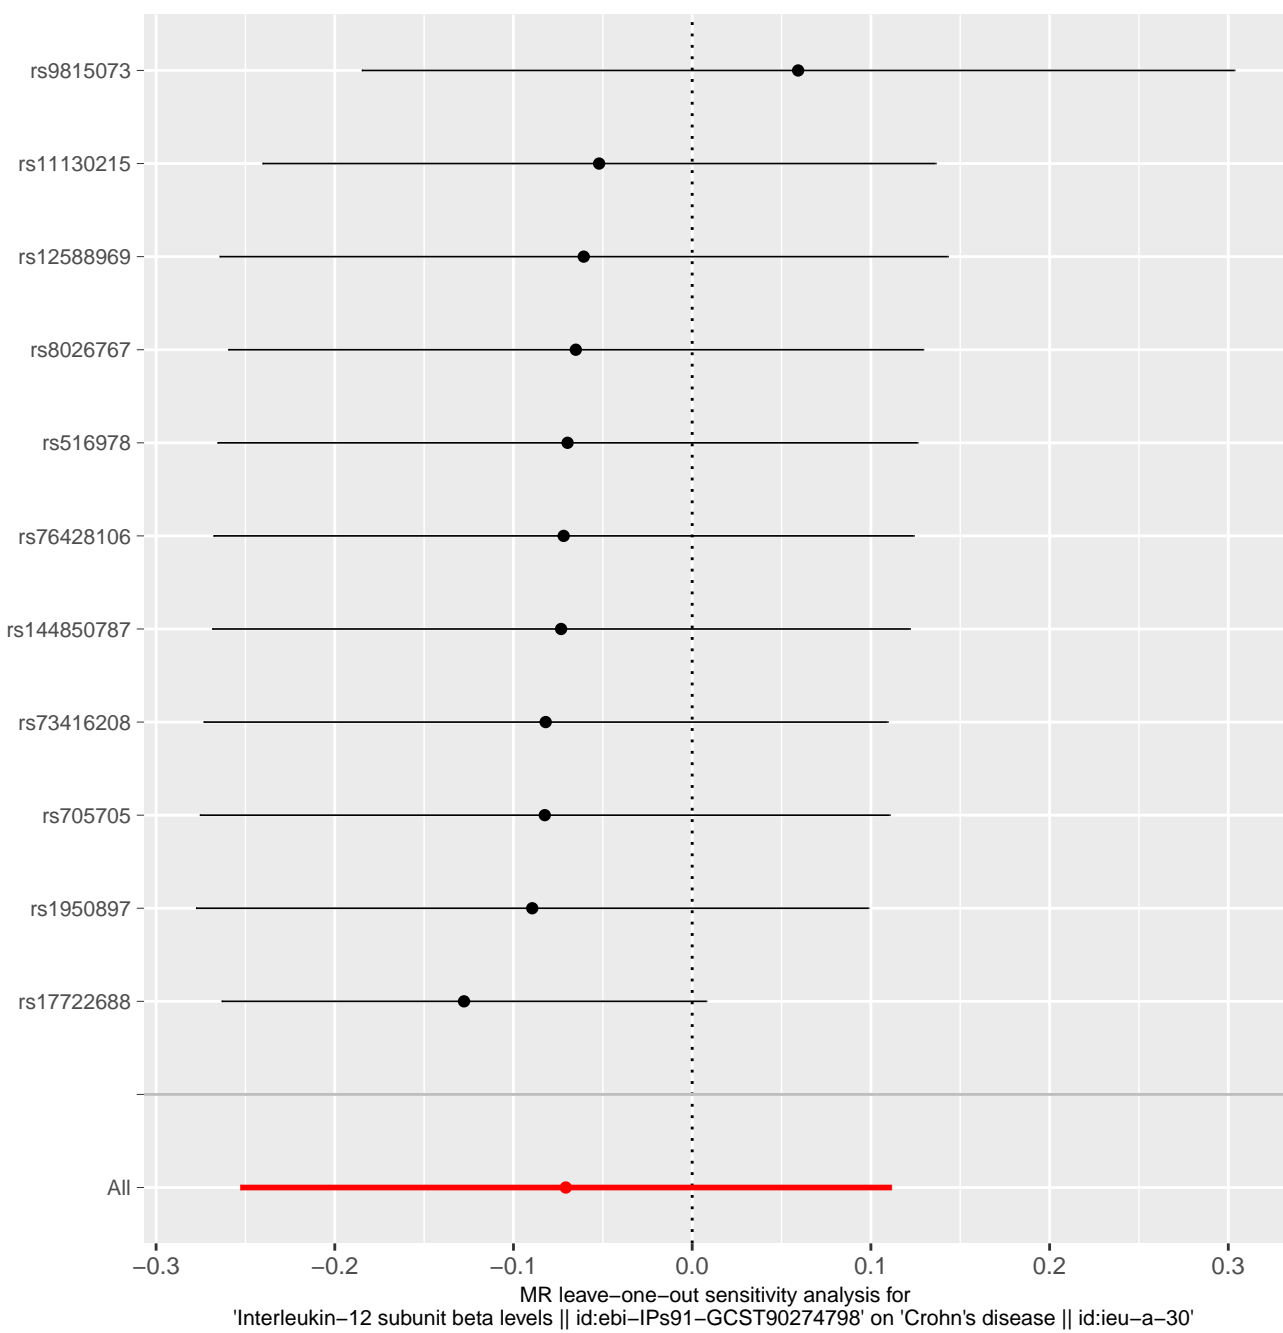

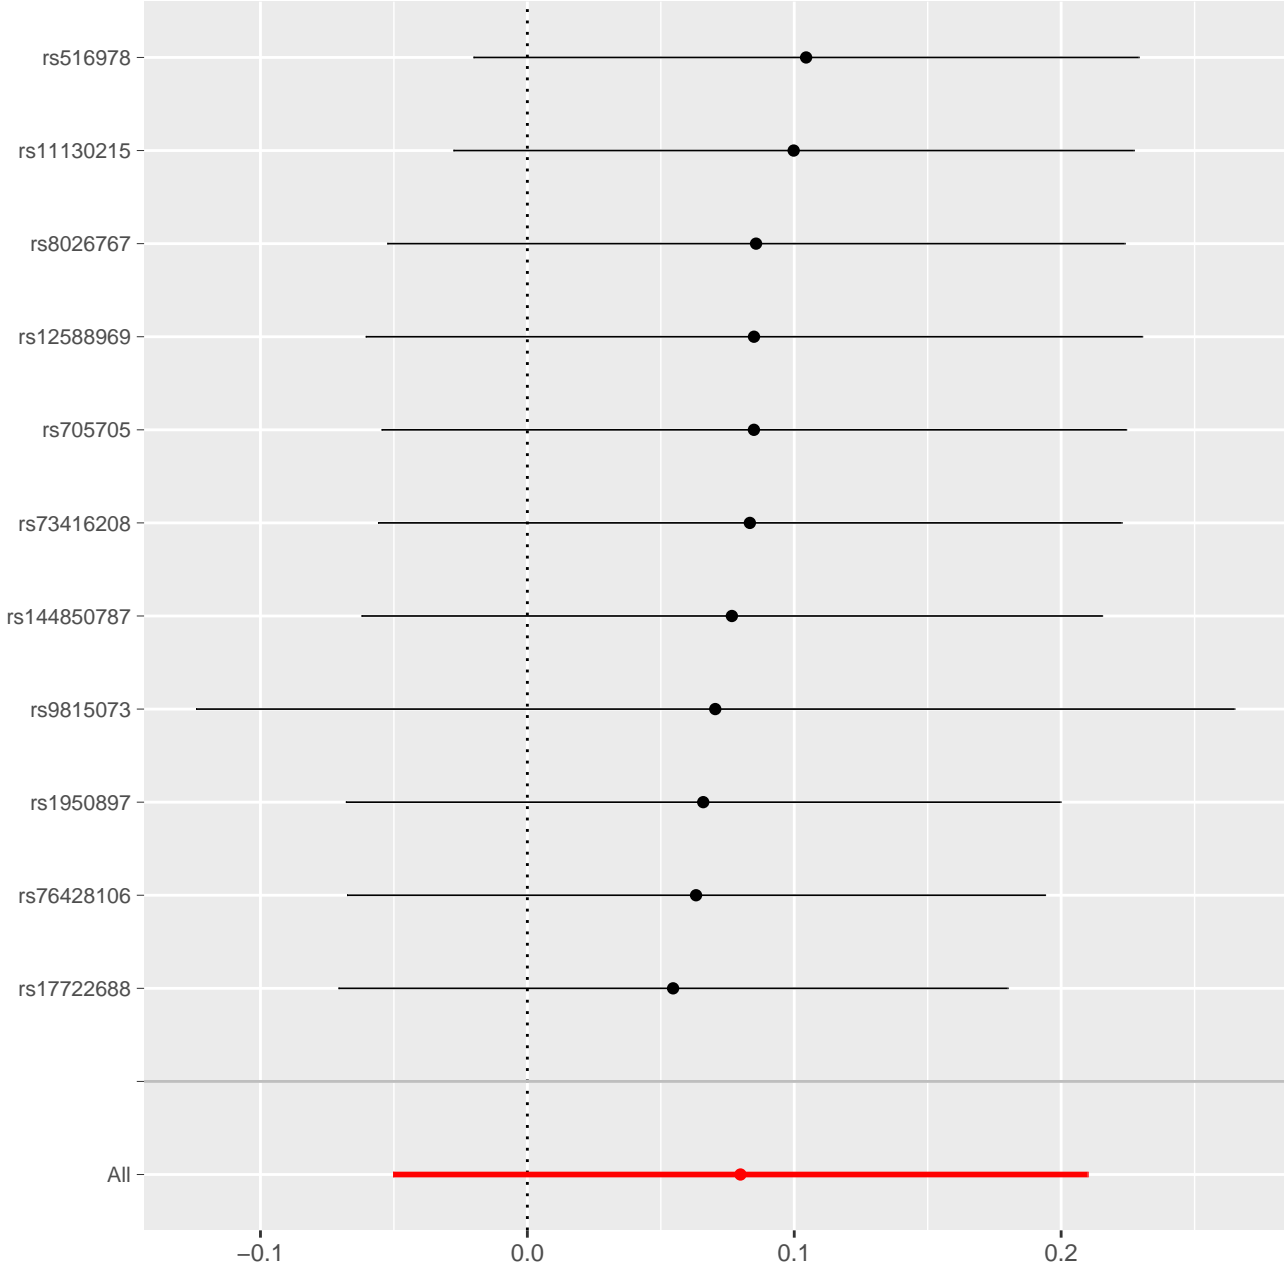

rs2228059

rs7898286

rs7137828

All

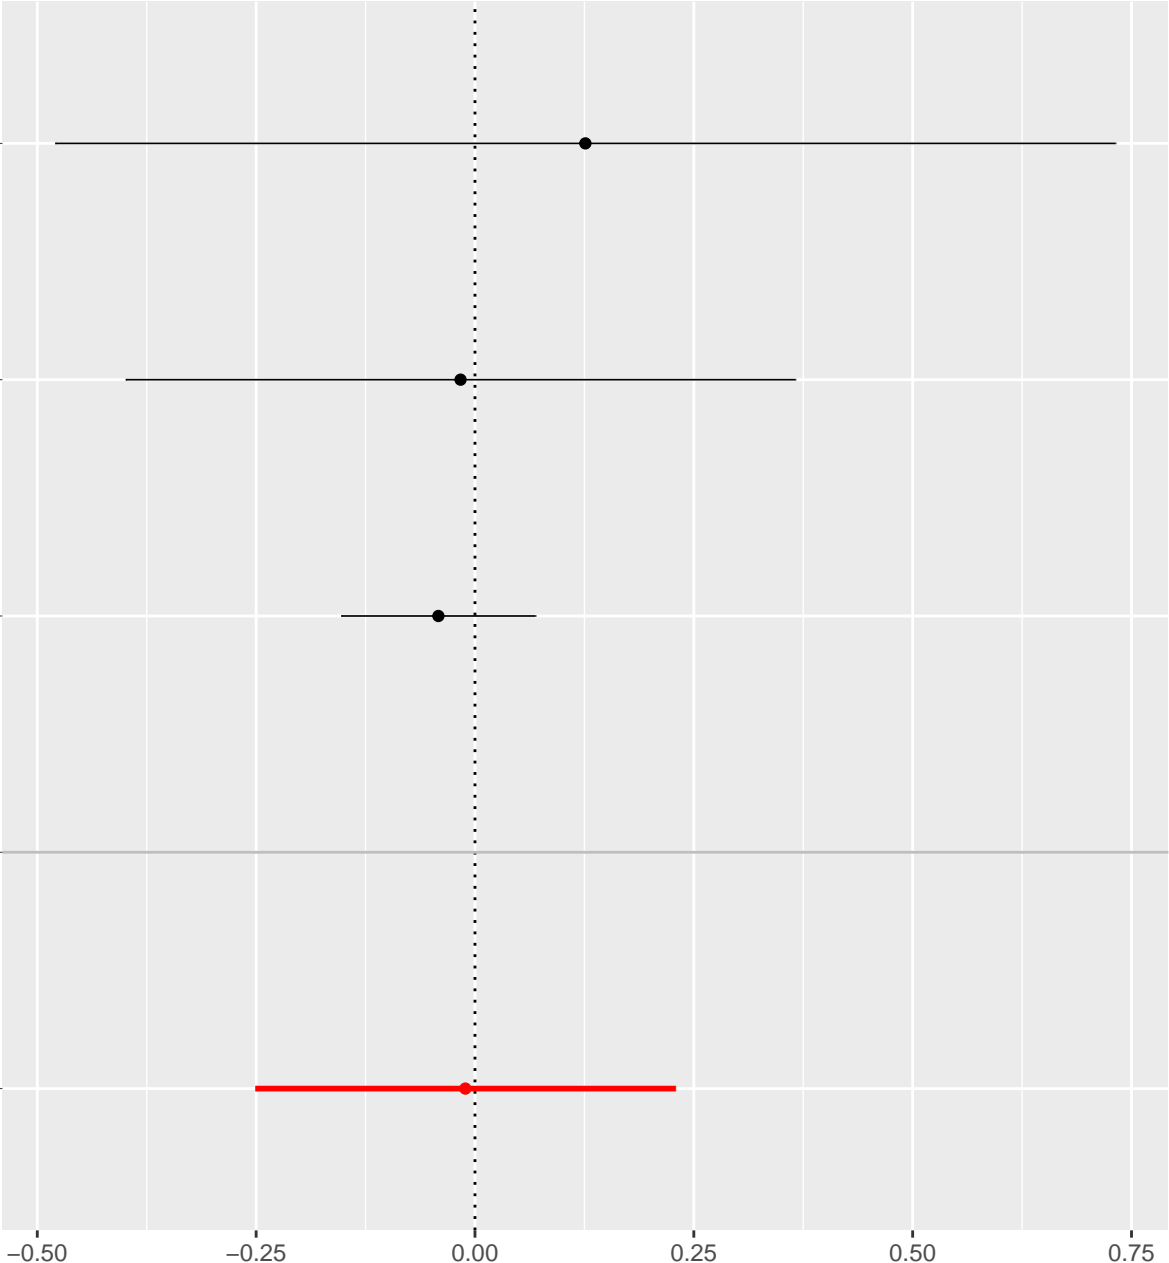

MR leave-one-out sensitivity analysis for 'Interleukin-15 receptor subunit alpha levels || id:ebi-IPs91-GCST90274800' on 'Crohn's disease || id:ieu-a-30'

rs7898286

rs2228059

rs7137828

All

-0.50

-0.25

0.00

0.25

0.50

0.75

MR leave-one-out sensitivity analysis for

'Interleukin-15 receptor subunit alpha levels || id:ebi-IPs91-GCST90274800' on 'Ulcerative colitis || id:ieu-a-32'

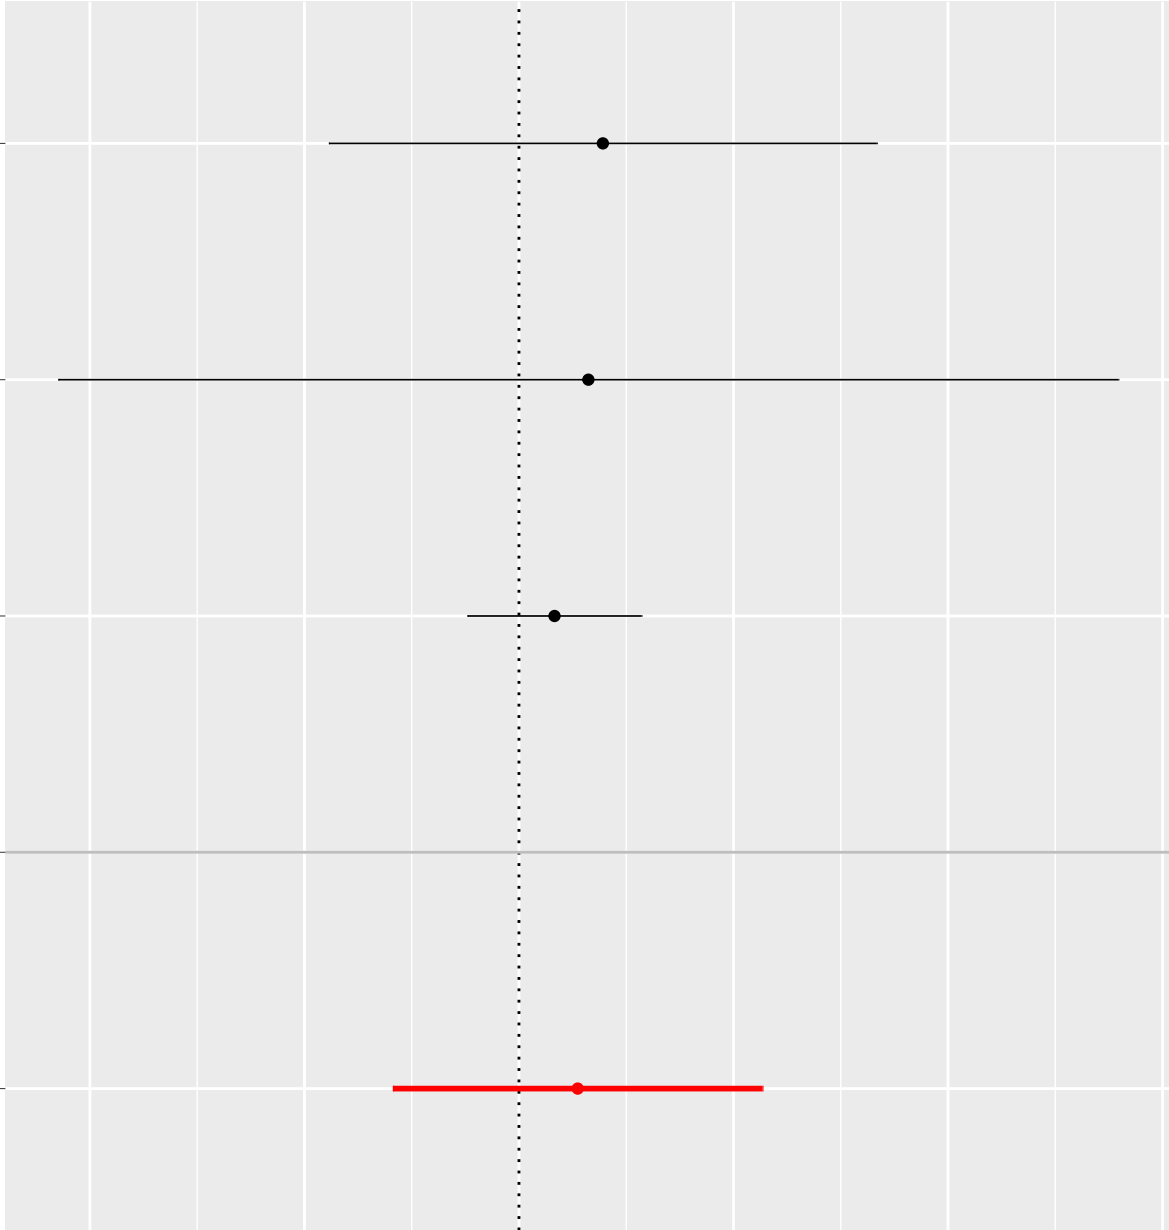



rs5744249

rs12681624

rs17229943

rs385076

All

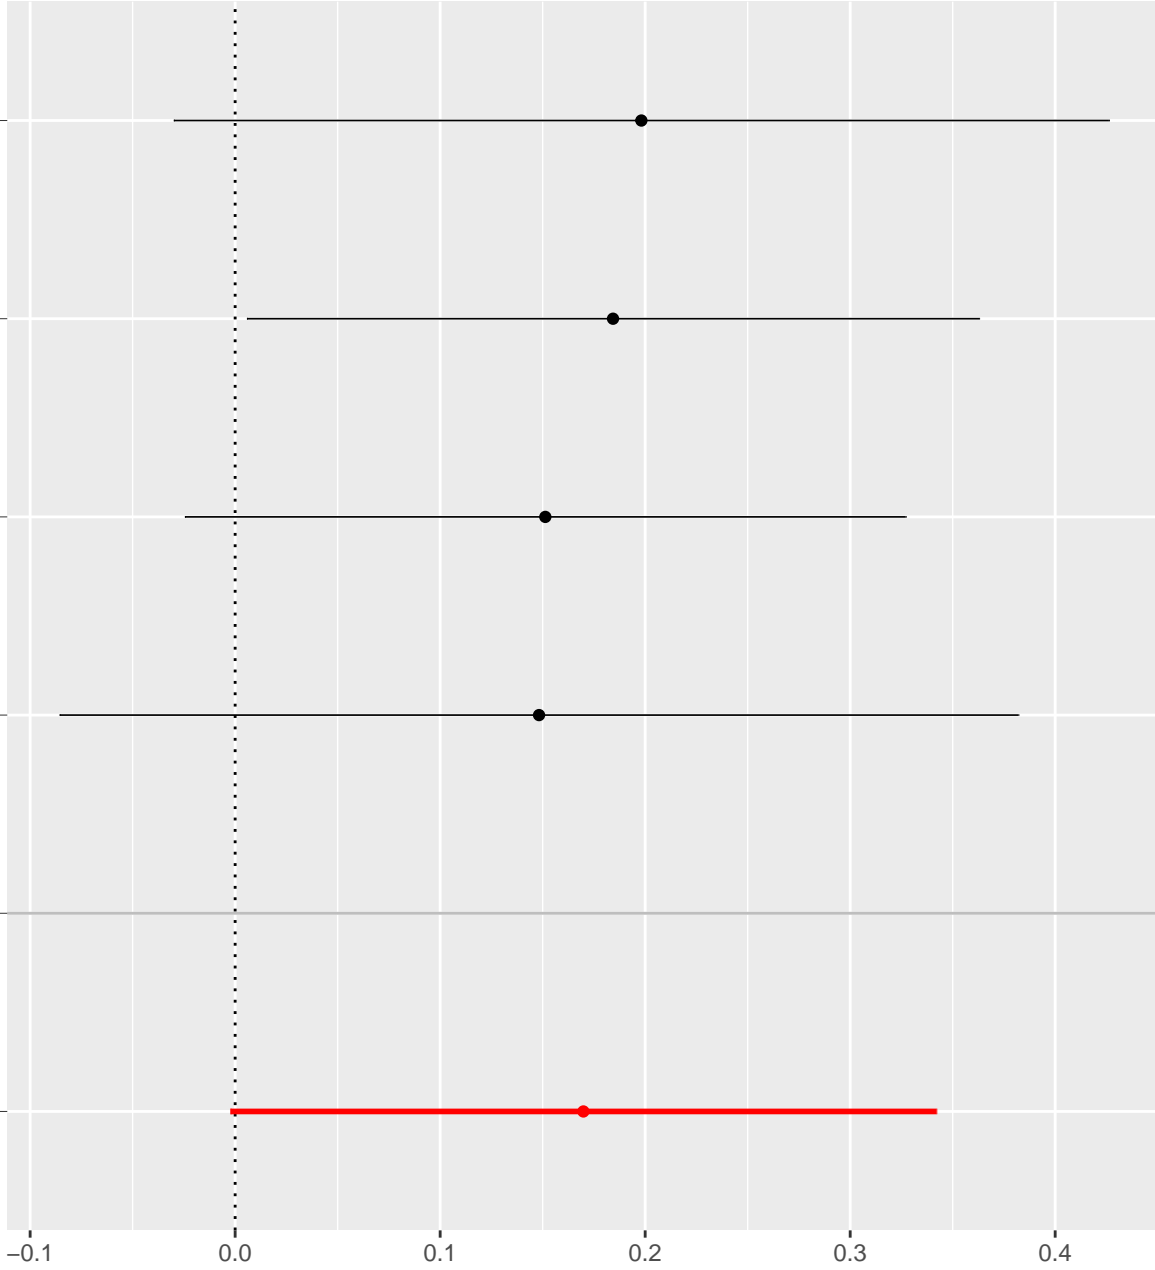

rs12681624

rs385076

rs17229943

rs5744249

All

0.0

0.2

0.4

MR leave-one-out sensitivity analysis for  
'Interleukin-18 levels || id:ebi-IPs91-GCST90274803' on 'Ulcerative colitis || id:ieu-a-32'

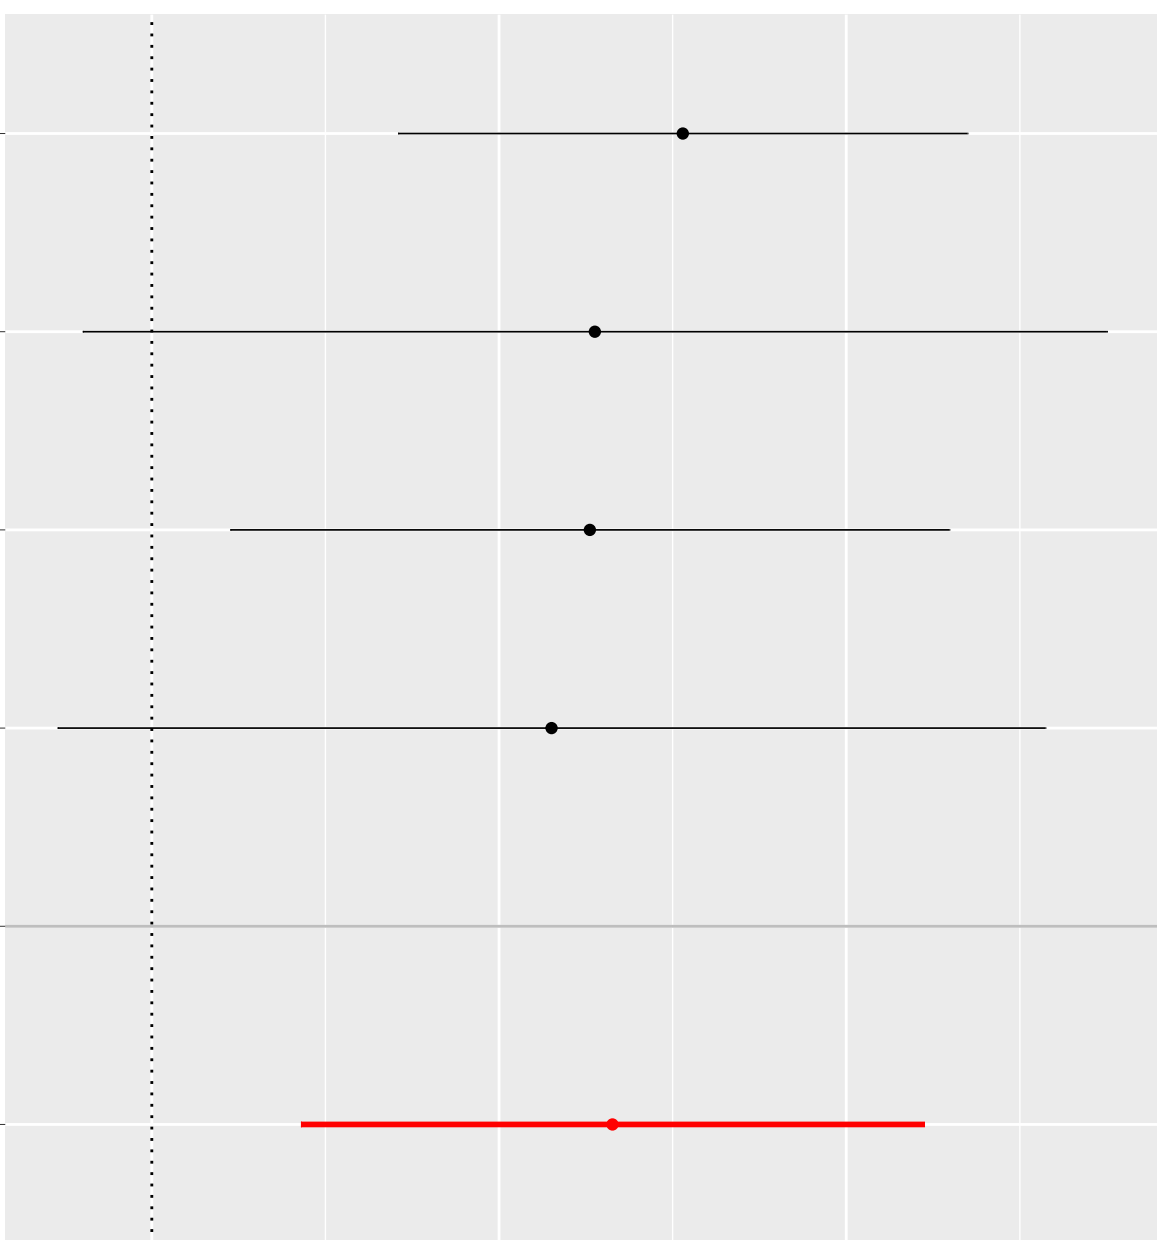

rs75366565

rs78714574

rs78357146

rs2732865

rs951774

All

0.0

0.1

0.2

MR leave-one-out sensitivity analysis for  
'interleukin-18 receptor 1 levels || id:ebi-IPs91-GCST90274804' on 'Crohn's disease || id:ieu-a-30'

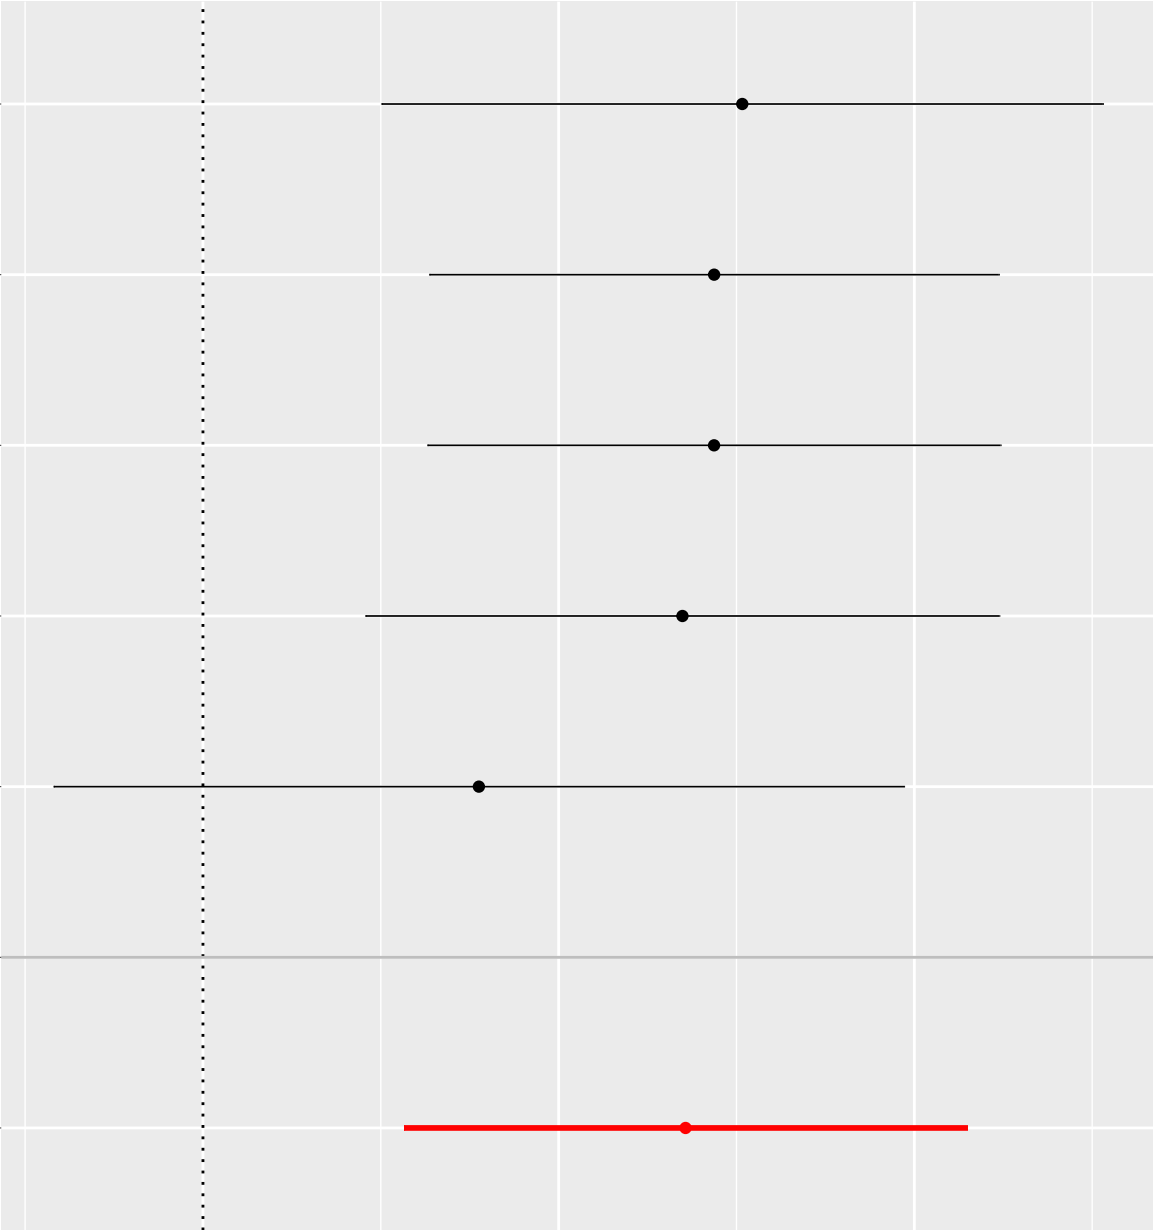

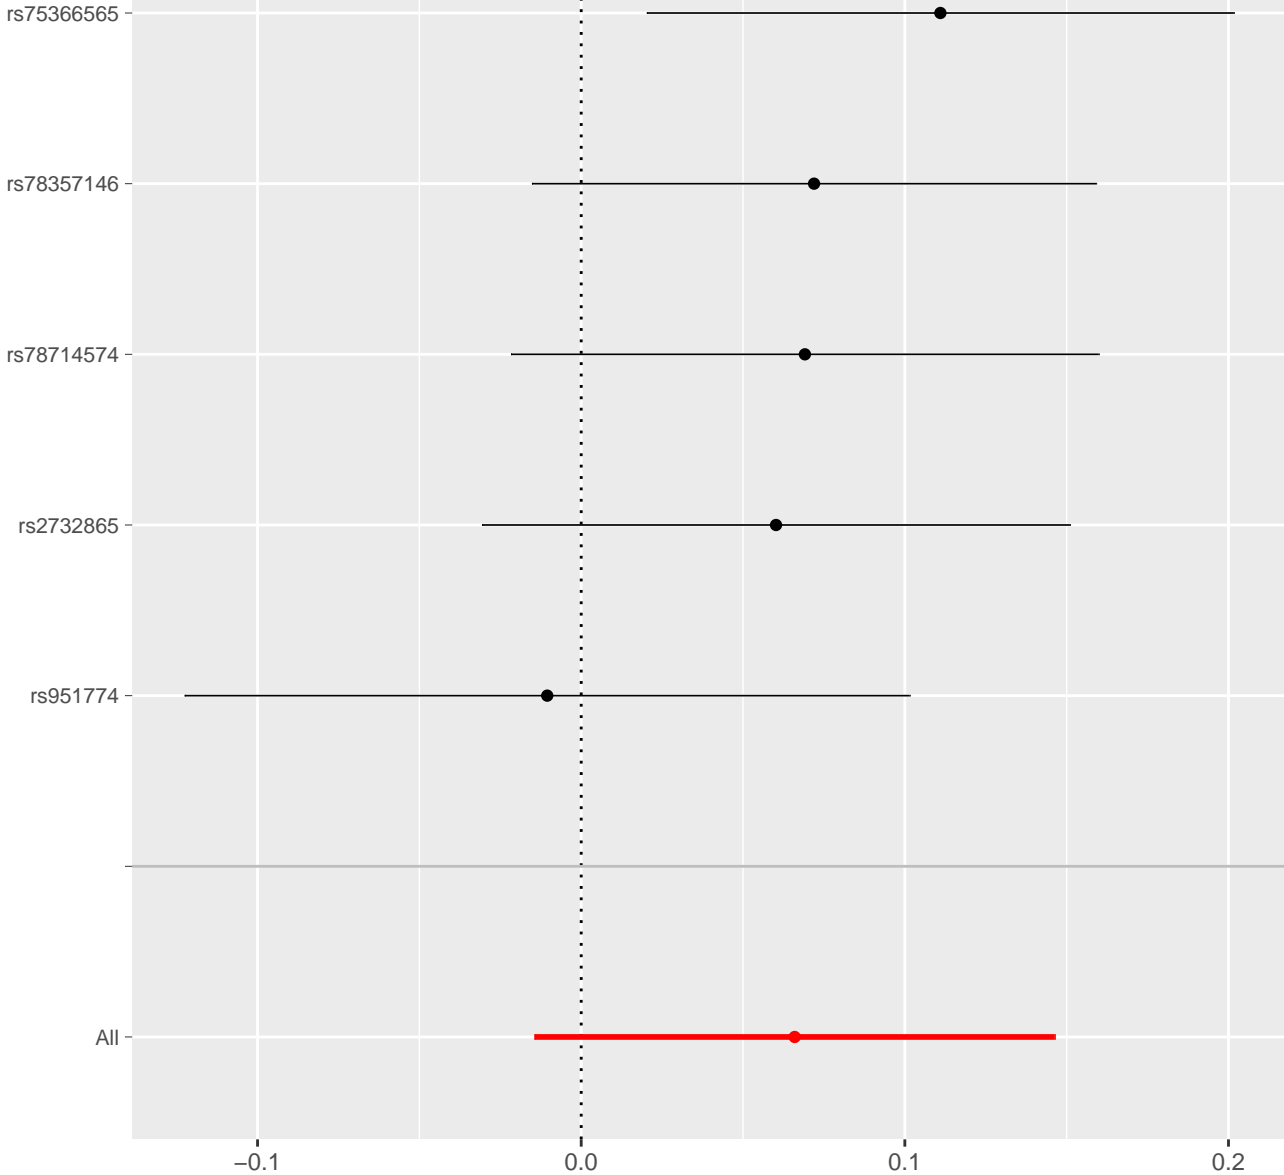

MR leave-one-out sensitivity analysis for 'interleukin-18 receptor 1 levels || id:ebi-IPs91-GCST90274804' on 'Ulcerative colitis || id:ieu-a-32'

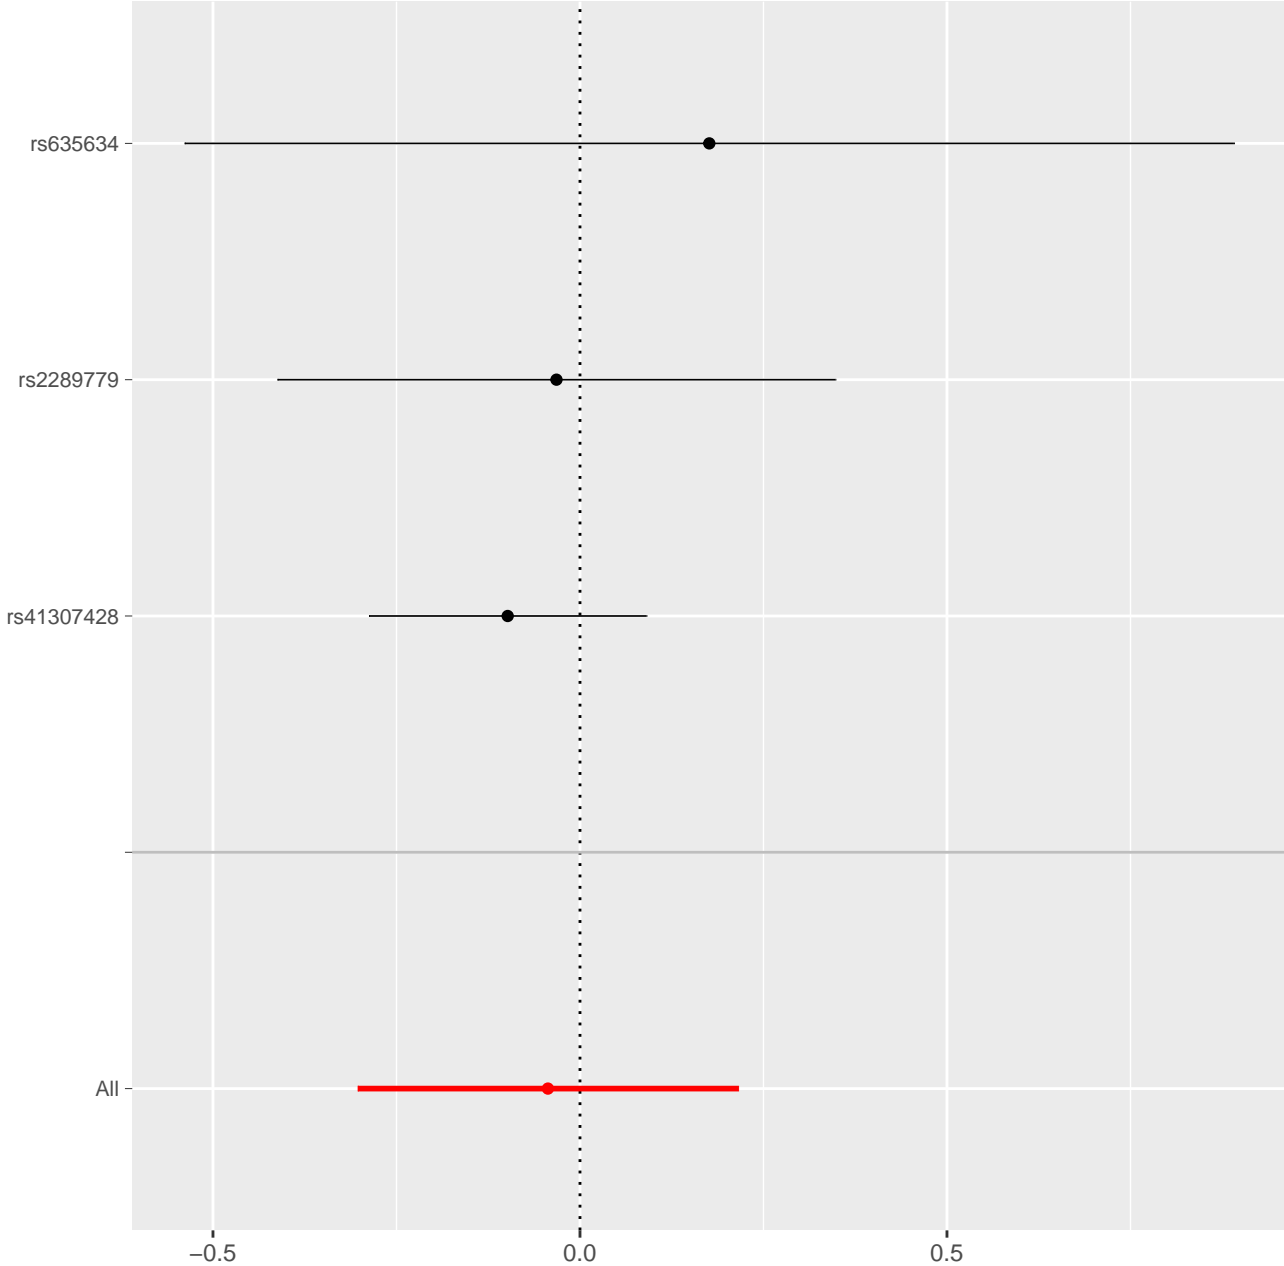

MR leave-one-out sensitivity analysis for 'Leukemia inhibitory factor receptor levels || id:ebi-IPs91-GCST90274820' on 'Crohn's disease || id:ieu-a-30'

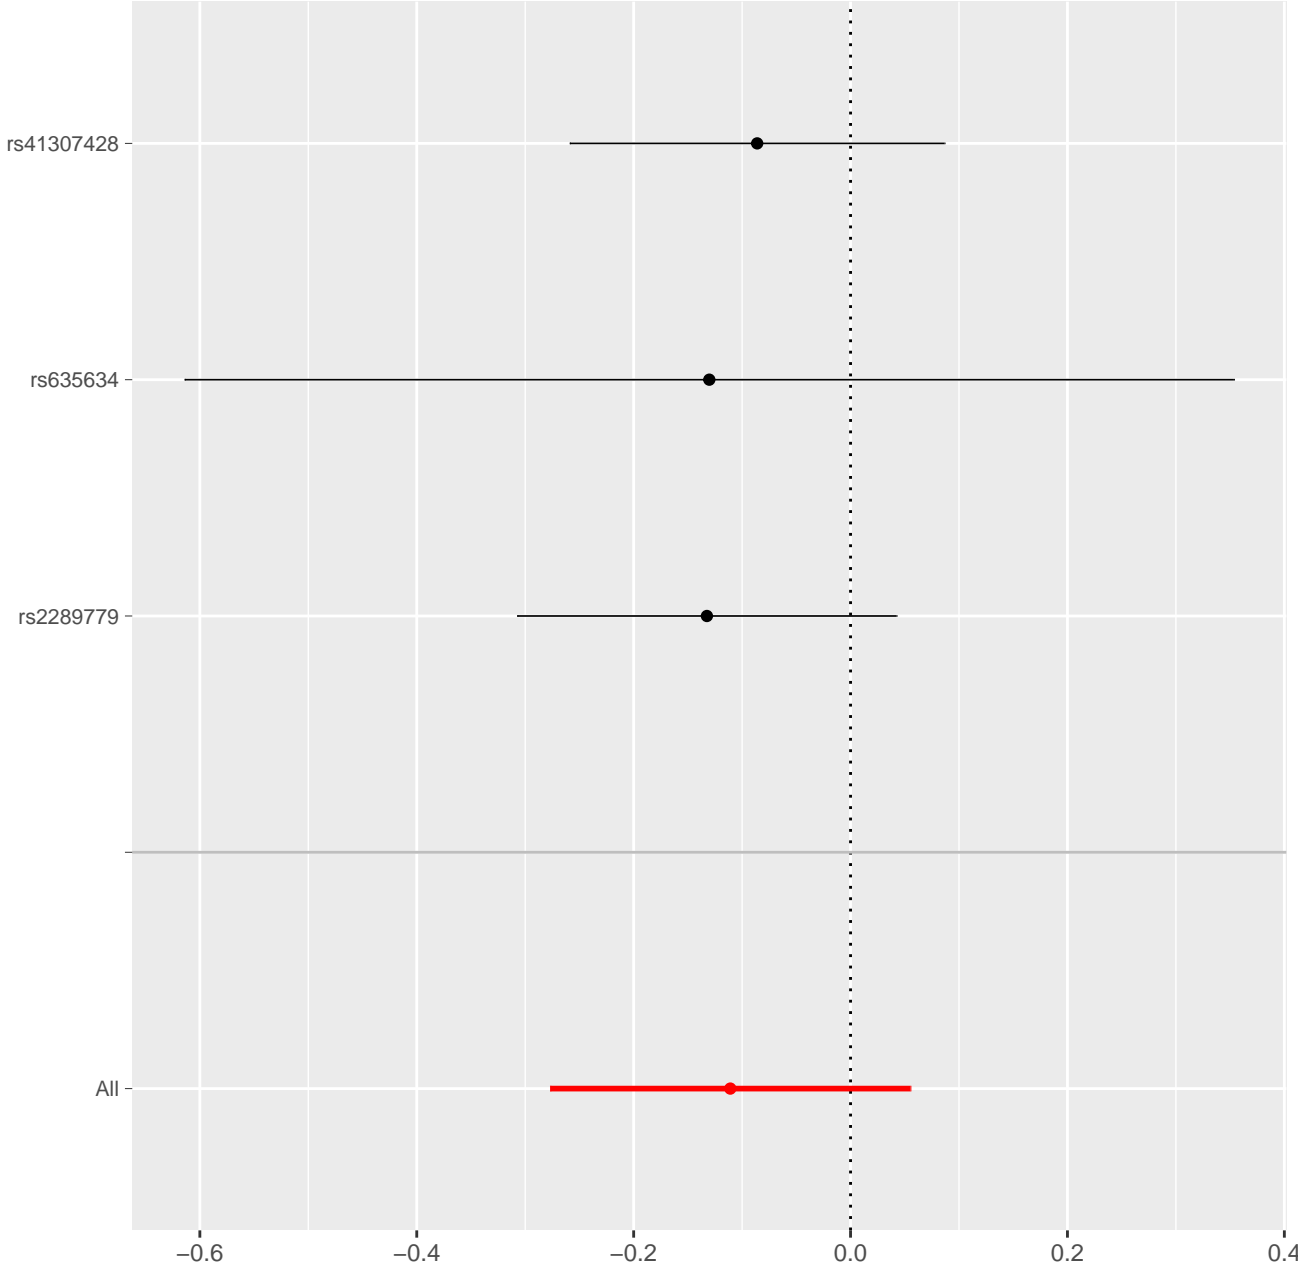

MR leave-one-out sensitivity analysis for 'Leukemia inhibitory factor receptor levels || id:ebi-IPs91-GCST90274820' on 'Ulcerative colitis || id:ieu-a-32'

rs35728689

rs1846616

rs12075

All

-0.2

0.0

0.2

0.4

MR leave-one-out sensitivity analysis for

'Monocyte chemoattractant protein-1 levels || id:ebi-IPs91-GCST90274821' on 'Crohn's disease || id:ieu-a-30'

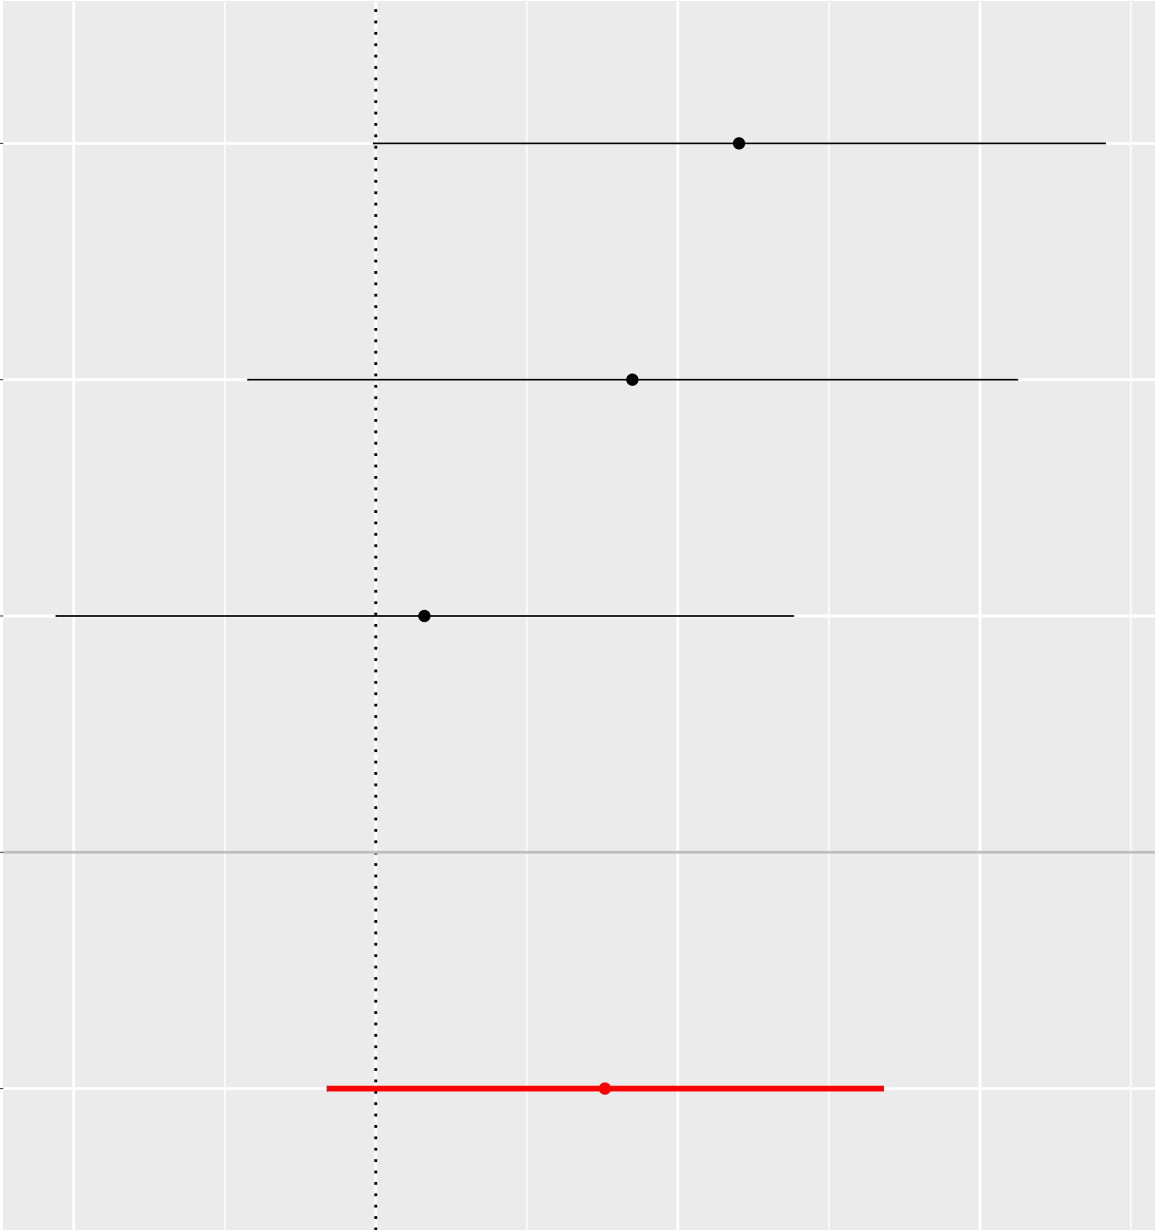

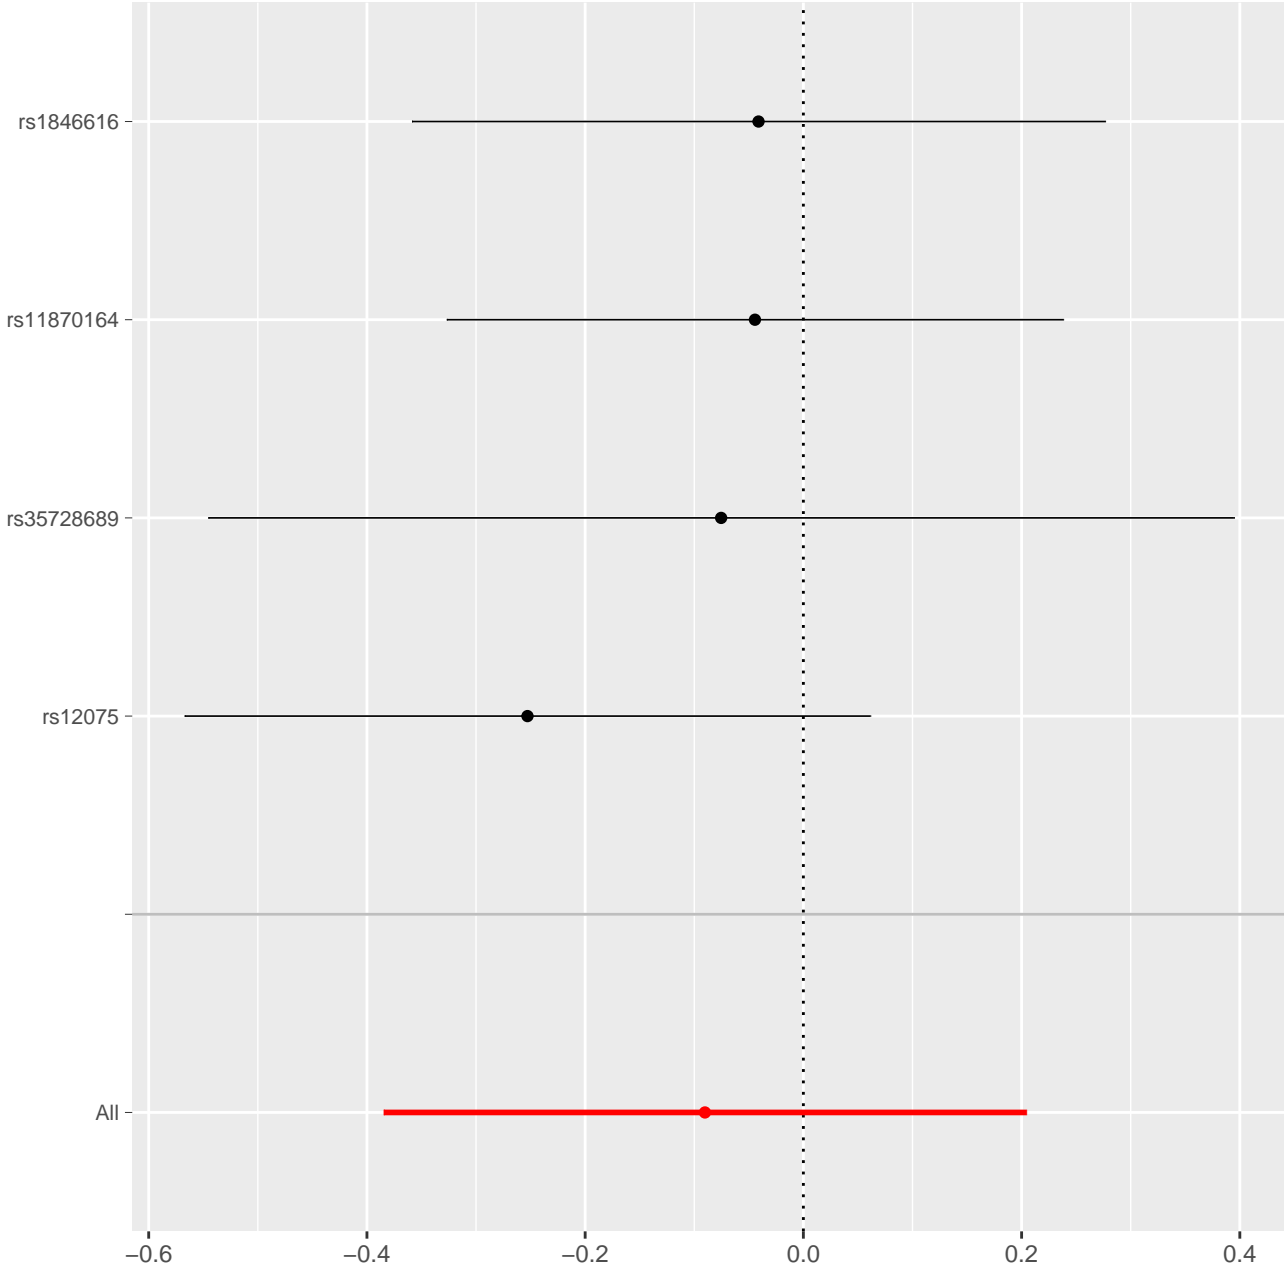



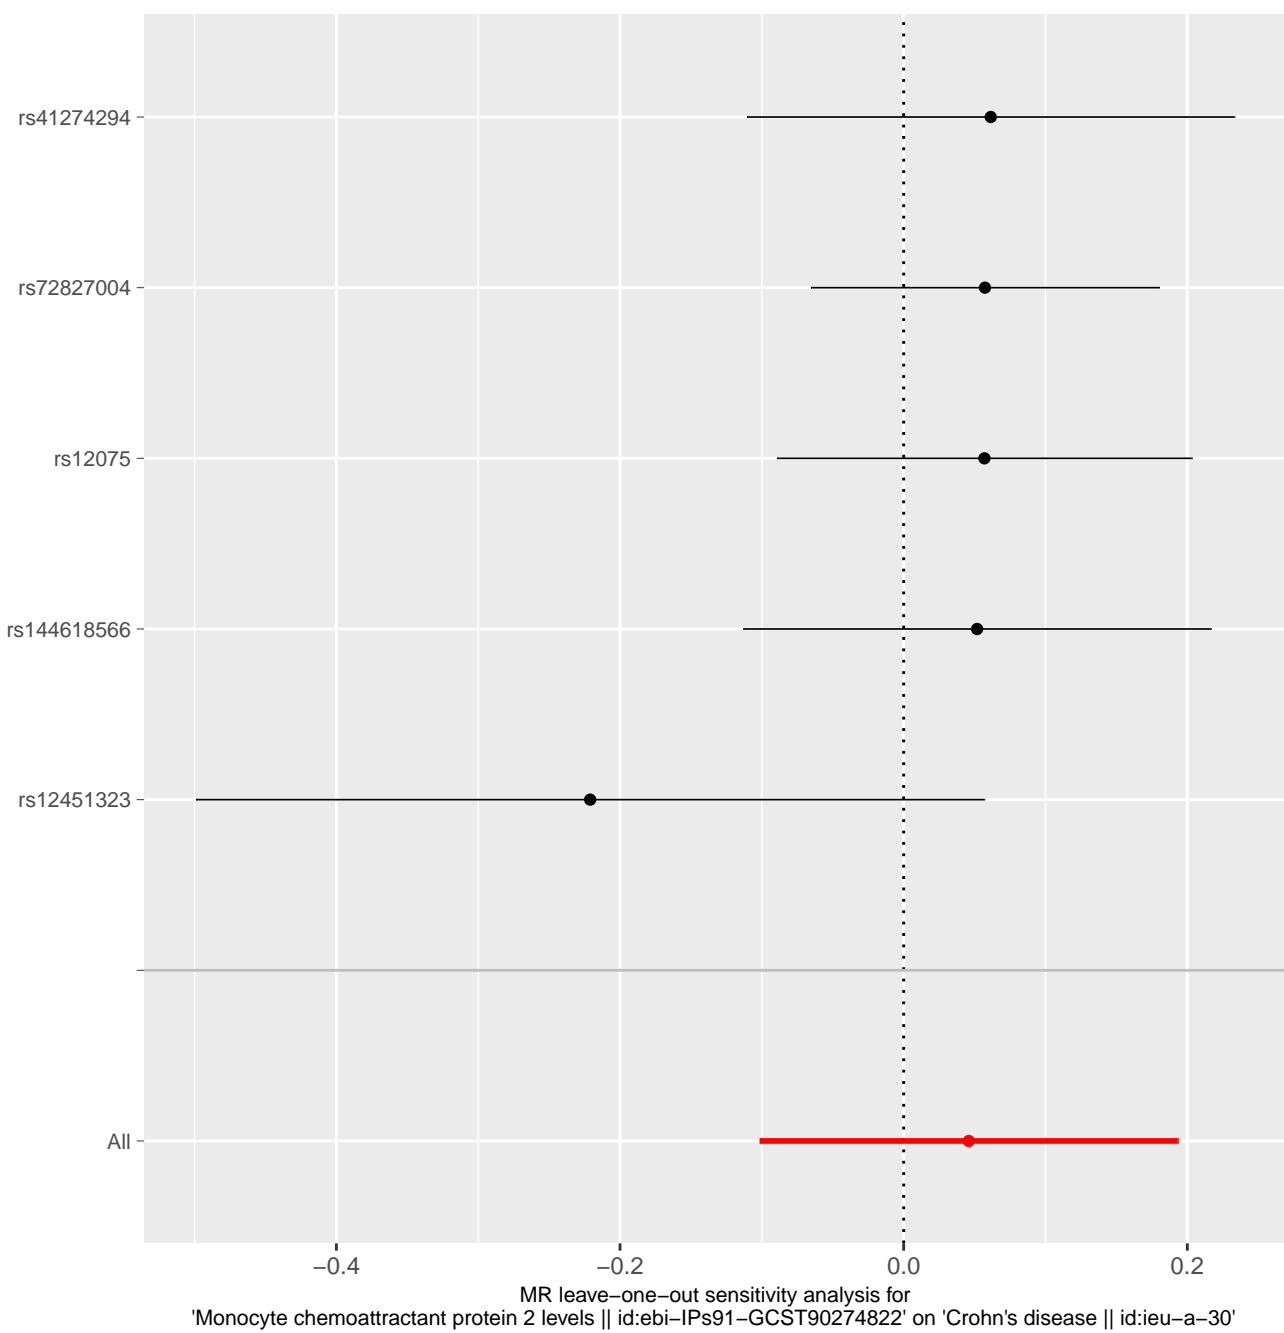

rs72827004

rs12075

rs144618566

rs41274294

rs12451323

All

-0.2

-0.1

0.0

0.1

MR leave-one-out sensitivity analysis for  
'Monocyte chemoattractant protein 2 levels || id:ebi-IPs91-GCST90274822' on 'Ulcerative colitis || id:ieu-a-32'

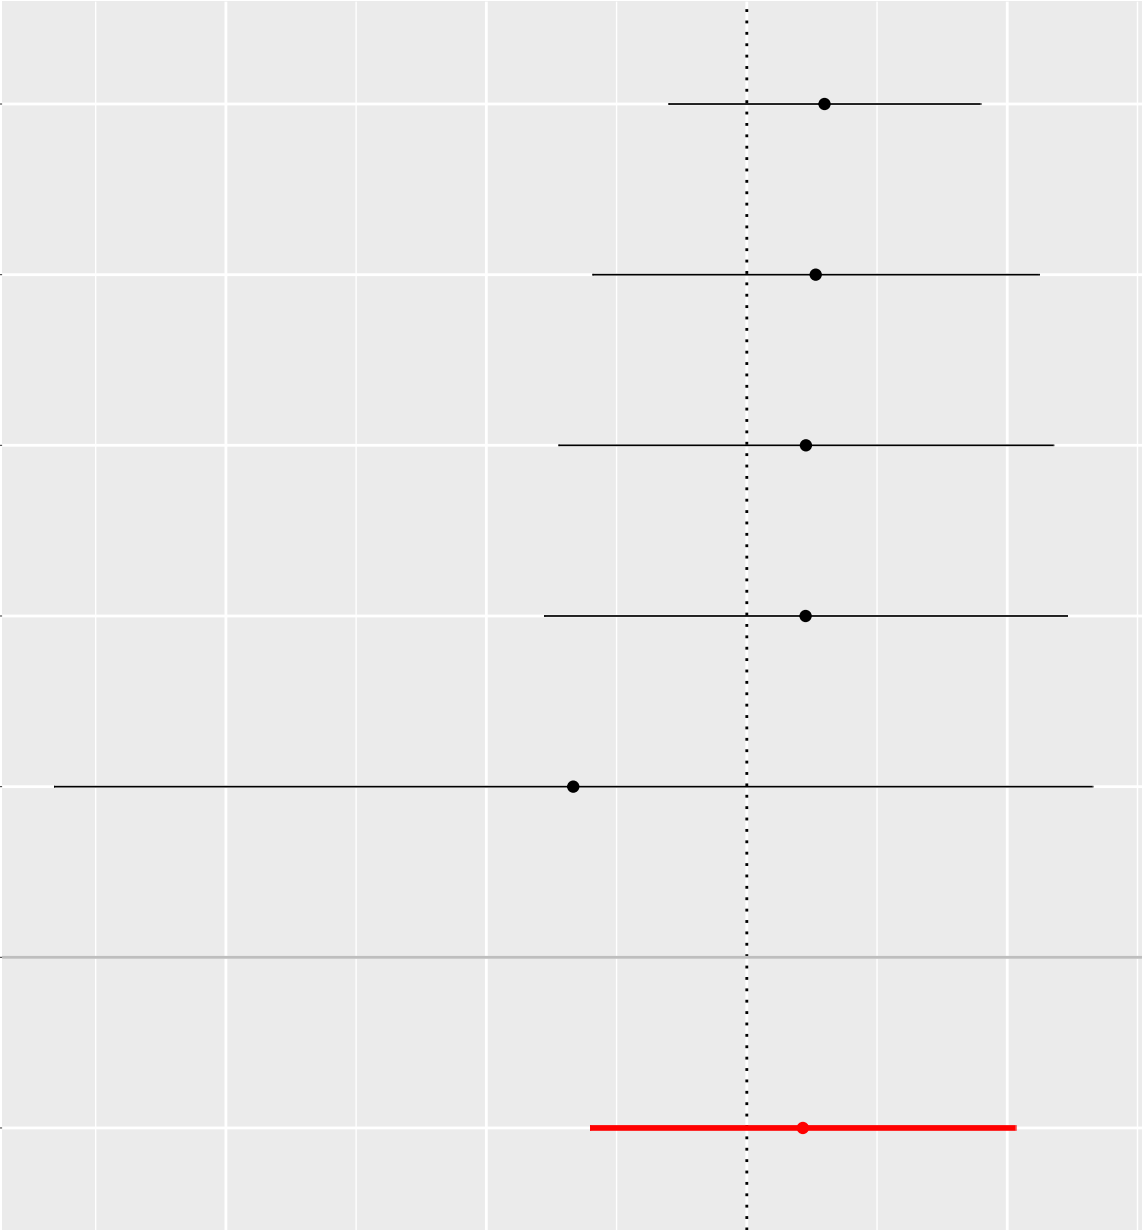

rs12075

rs7213460

rs4146770

rs7116054

rs2228467

All

-0.6

-0.3

0.0

0.3

MR leave-one-out sensitivity analysis for  
'Monocyte chemoattractant protein-3 levels || id:ebi-IPs91-GCST90274823' on 'Crohn's disease || id:ieu-a-30'

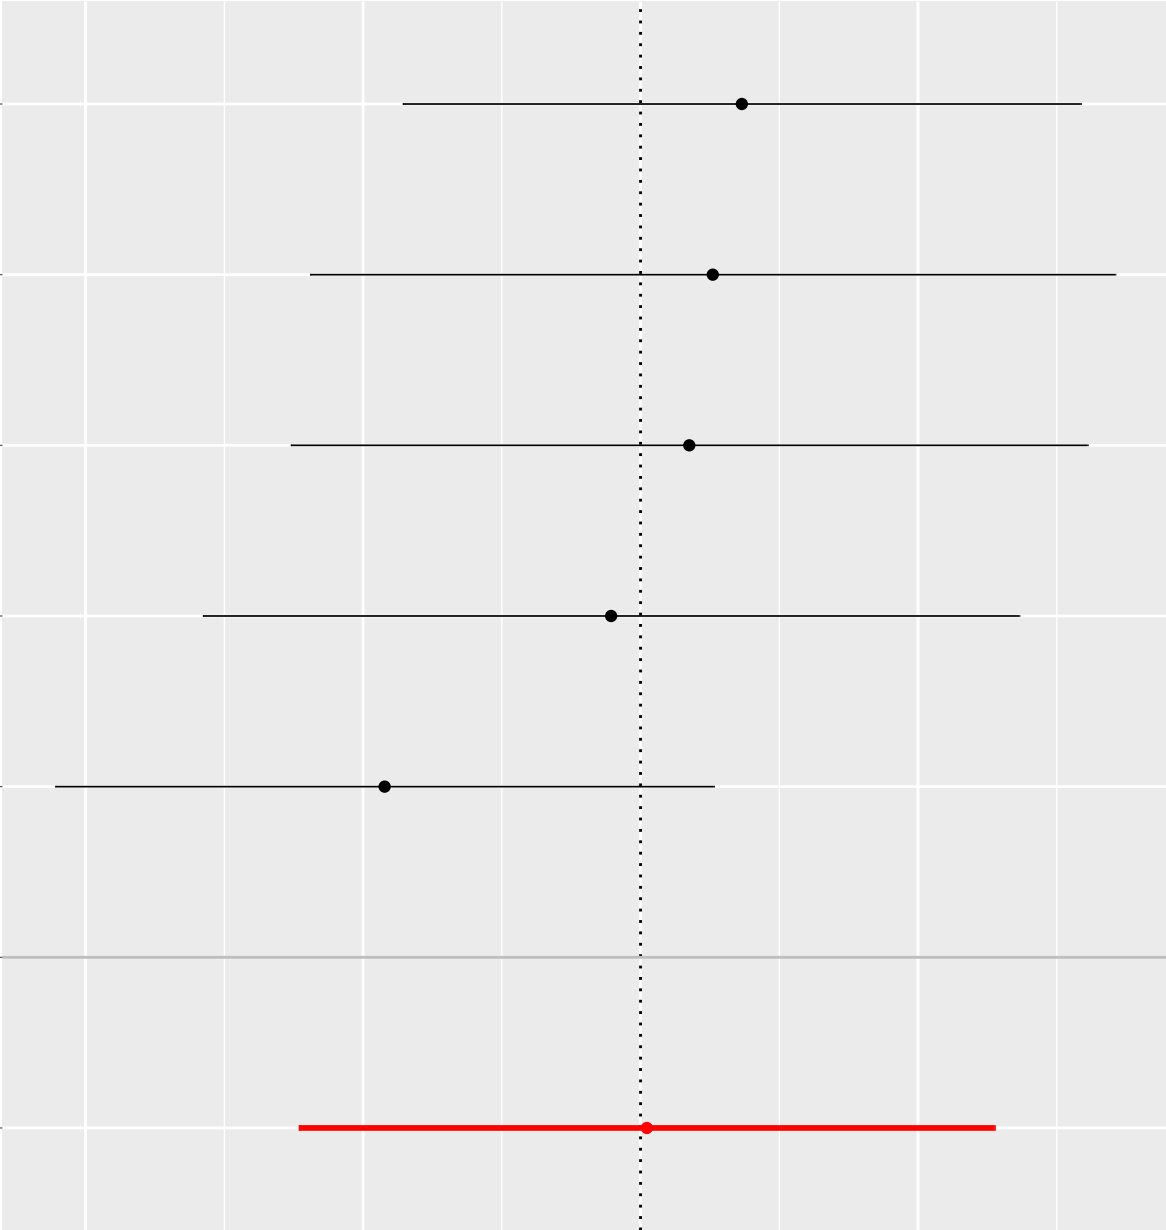

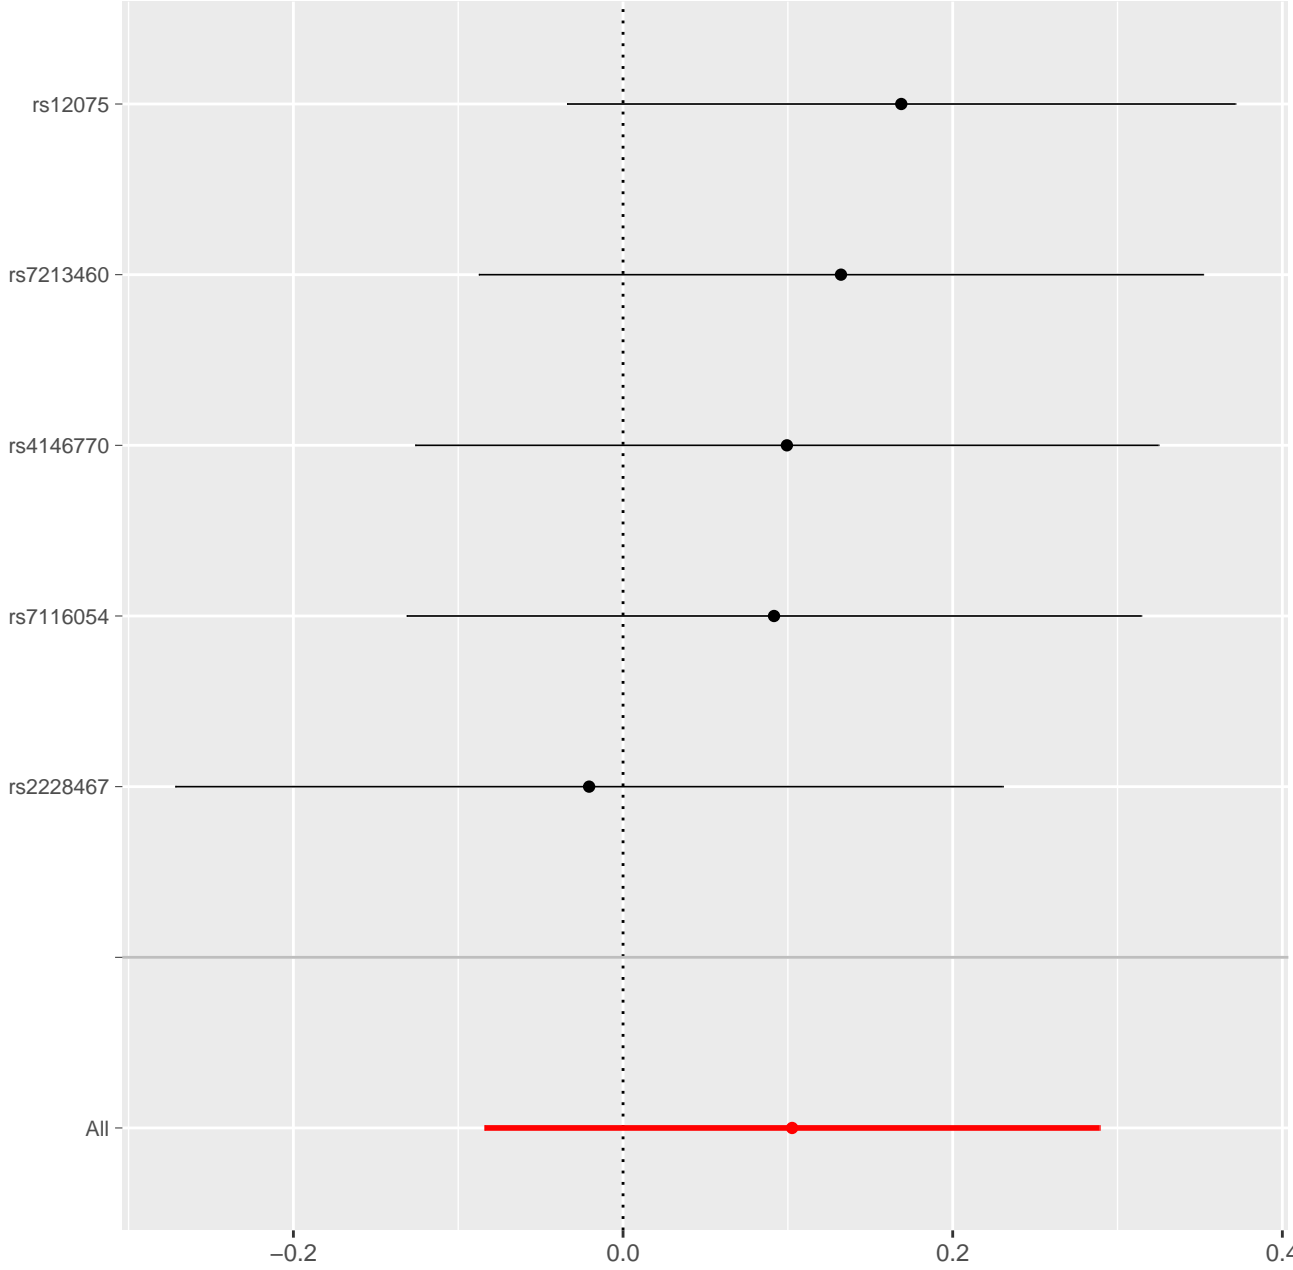

MR leave-one-out sensitivity analysis for 'Monocyte chemoattractant protein-3 levels || id:ebi-IPs91-GCST90274823' on 'Ulcerative colitis || id:ieu-a-32'

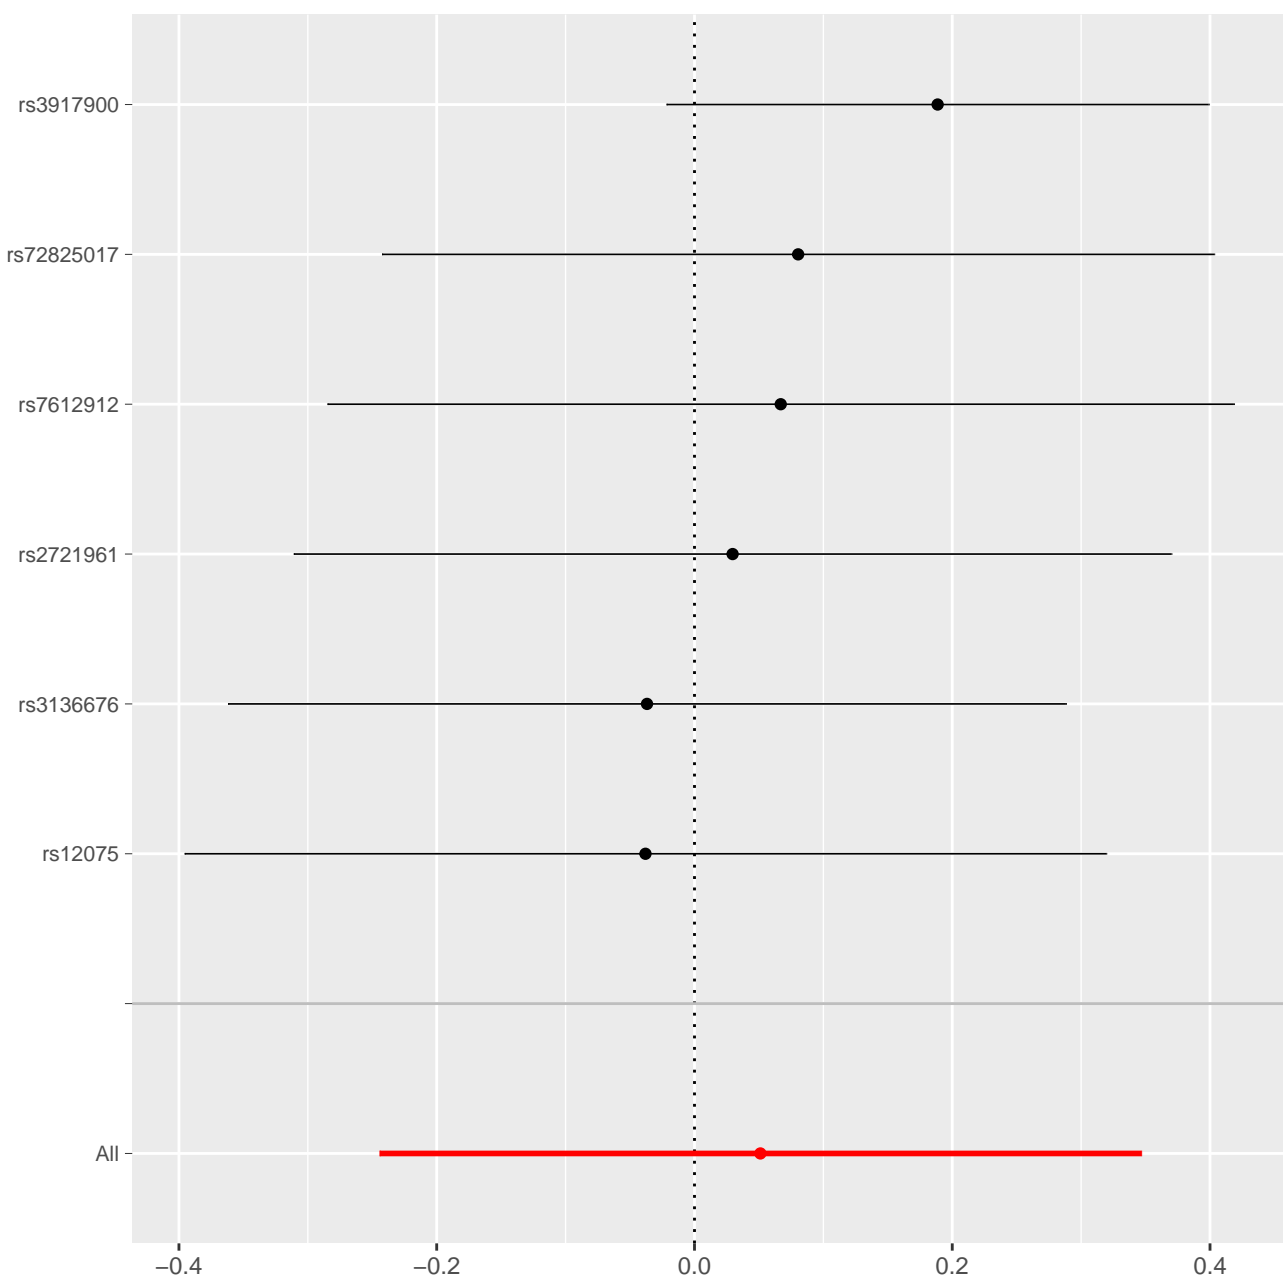

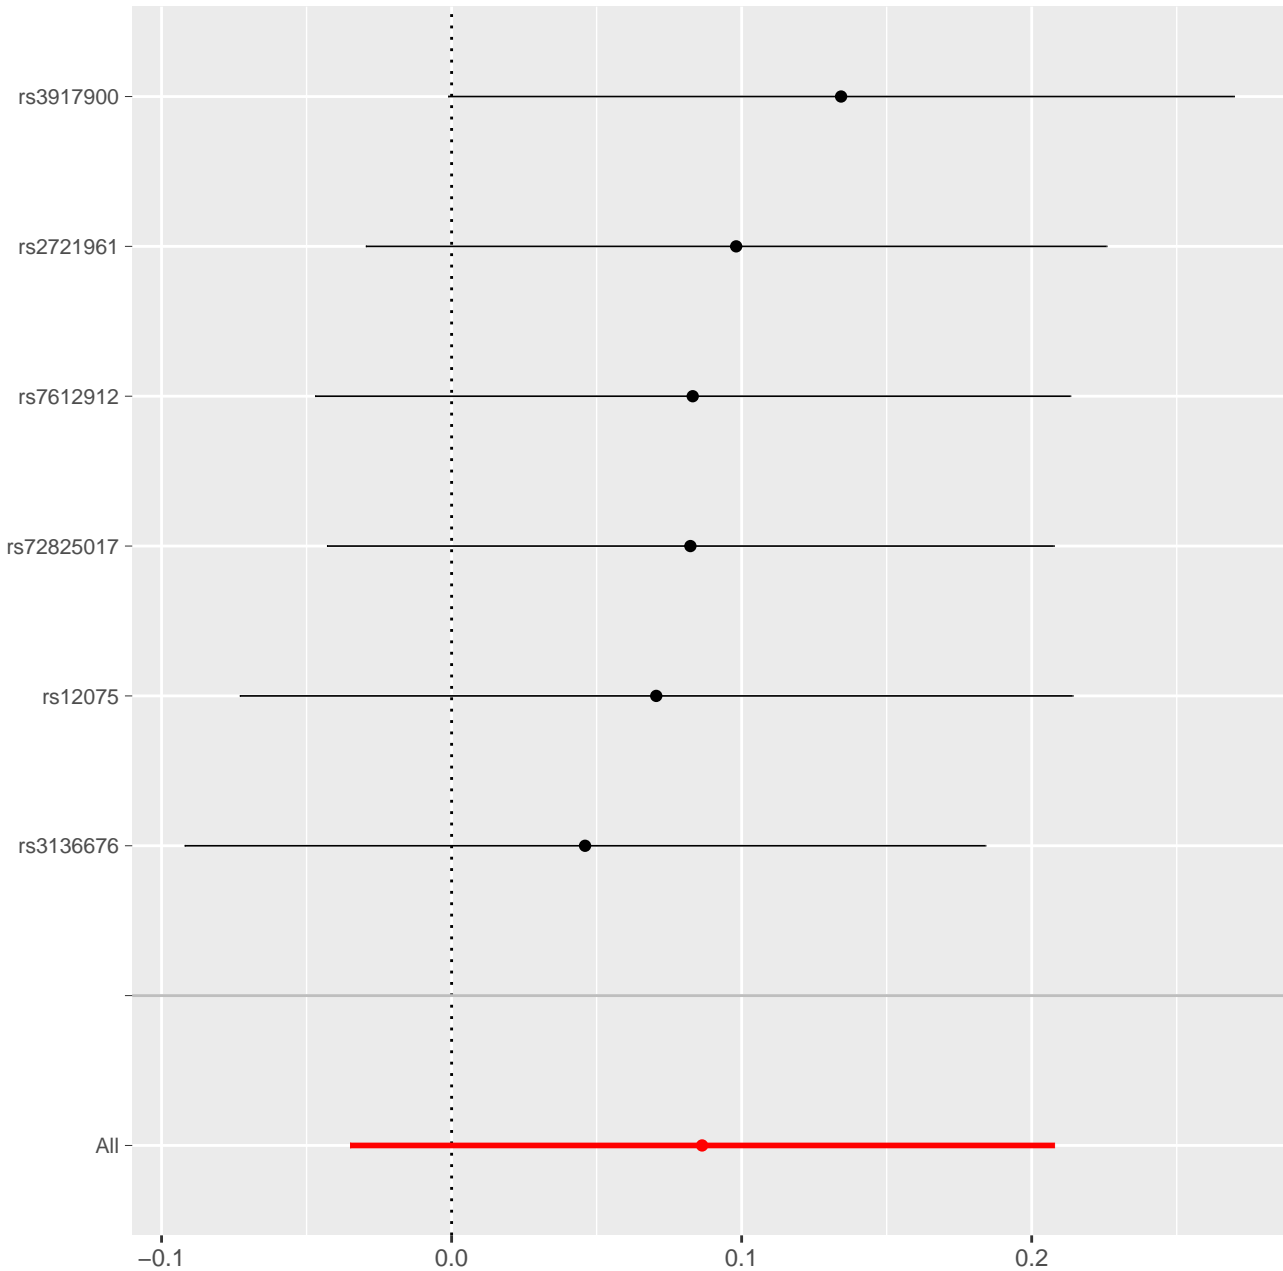

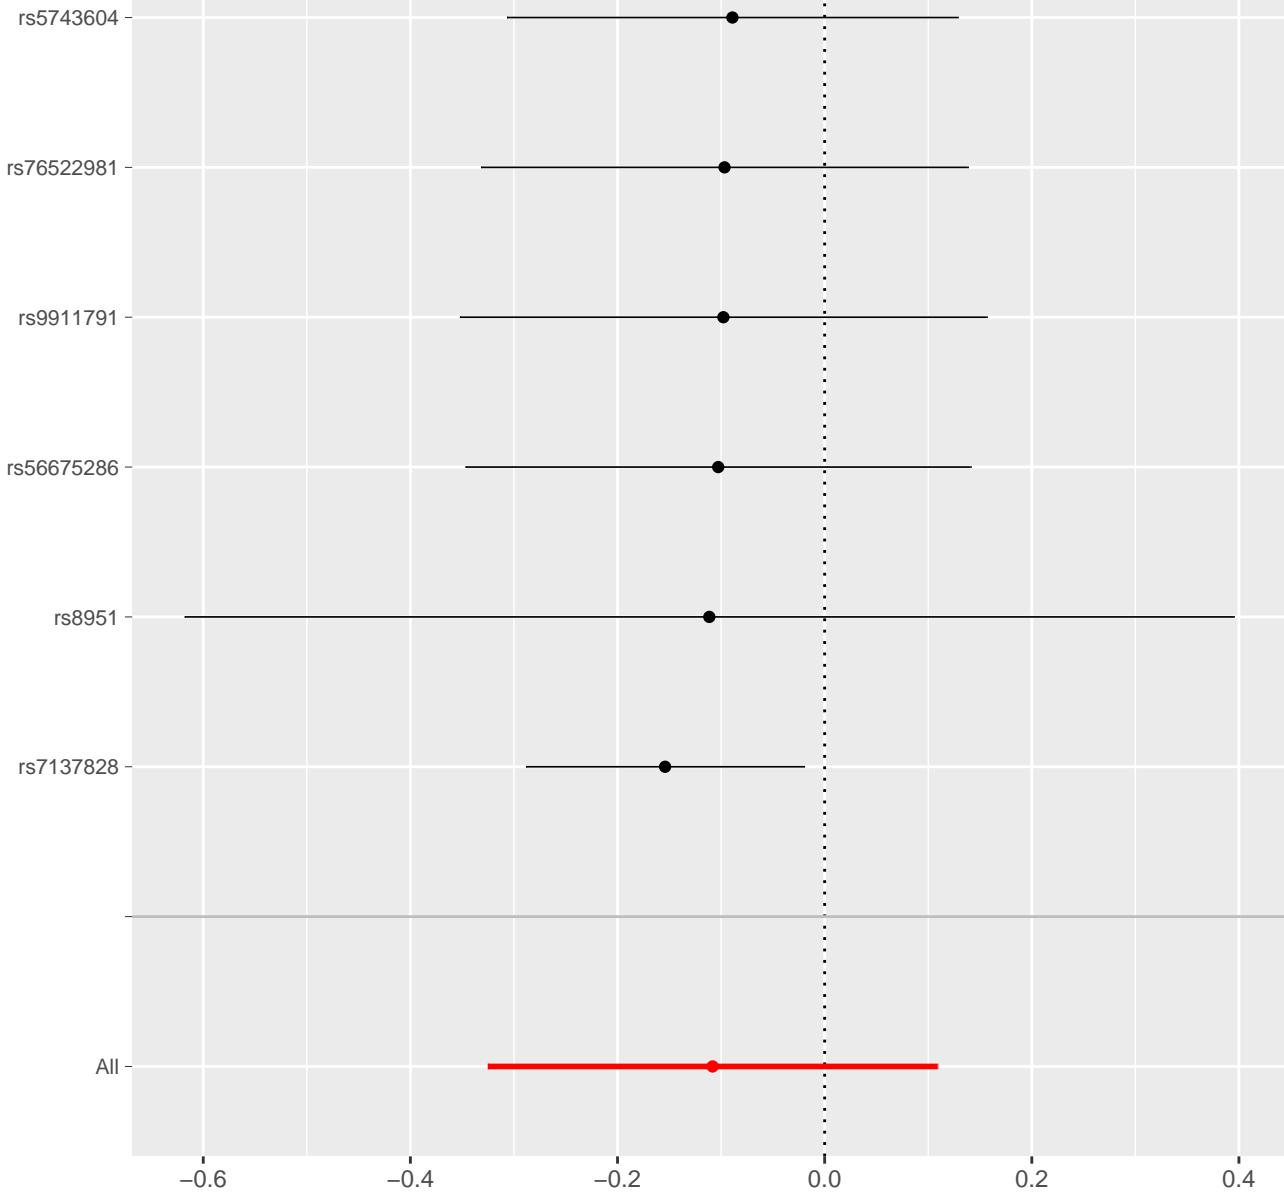

MR leave-one-out sensitivity analysis for 'Macrophage inflammatory protein 1a levels || id:ebi-IPs91-GCST90274825' on 'Crohn's disease || id:ieu-a-30'

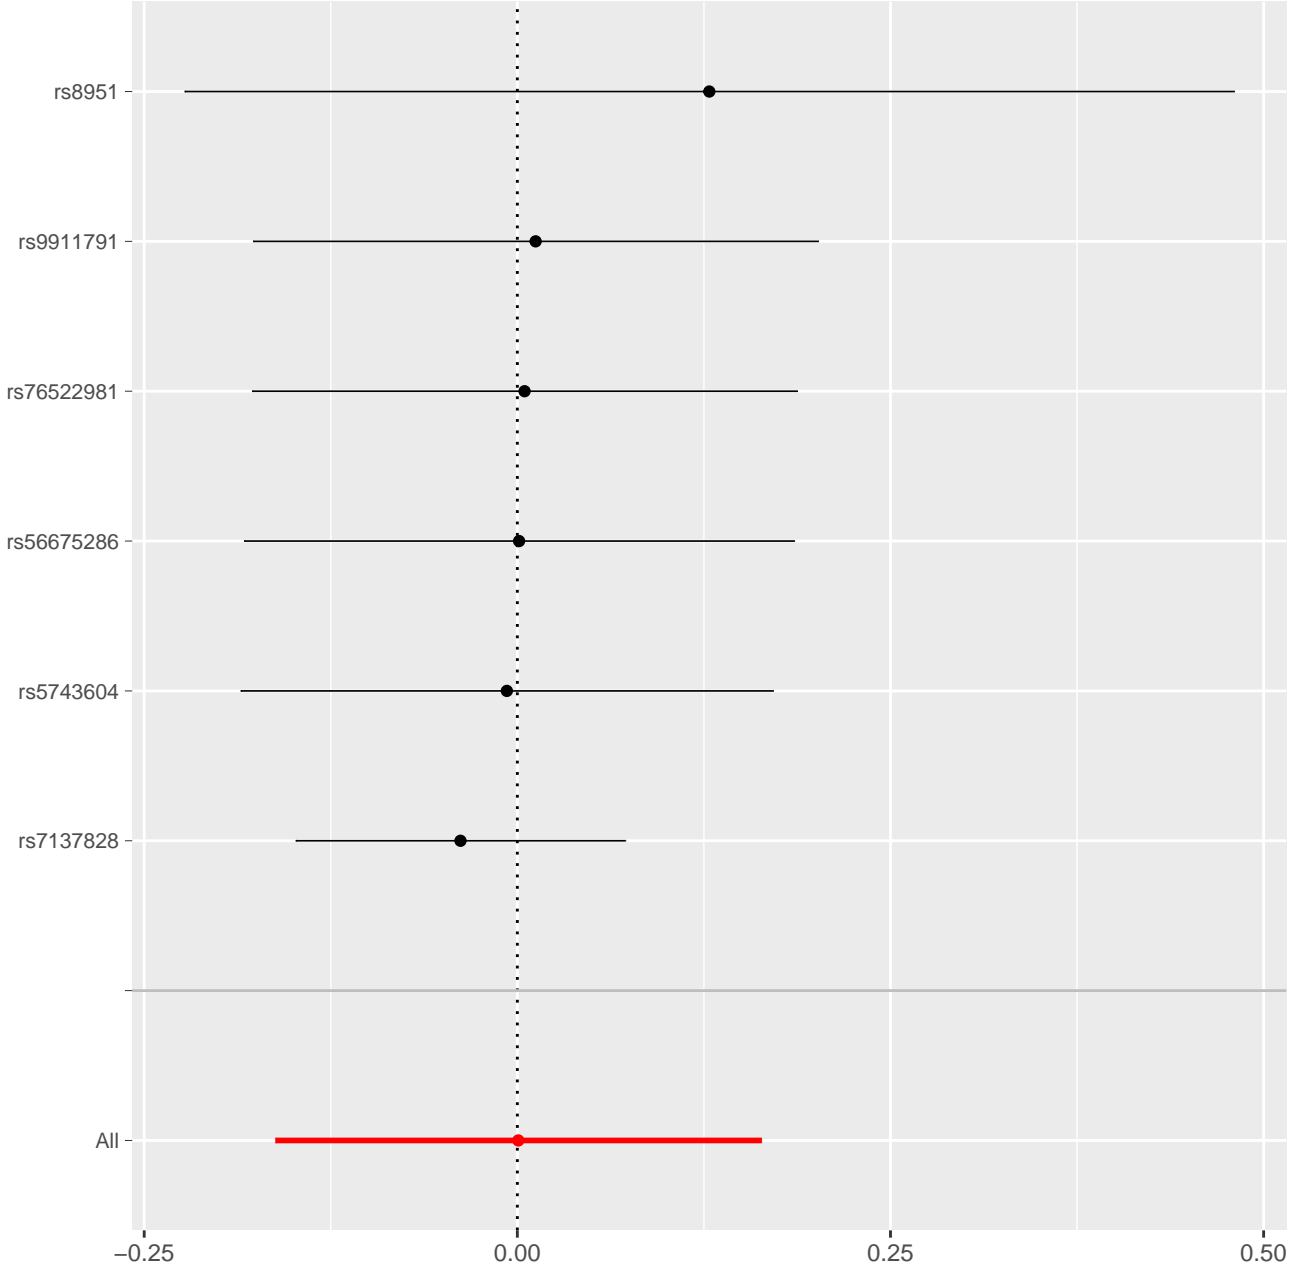

MR leave-one-out sensitivity analysis for 'Macrophage inflammatory protein 1a levels || id:ebi-IPs91-GCST90274825' on 'Ulcerative colitis || id:ieu-a-32'



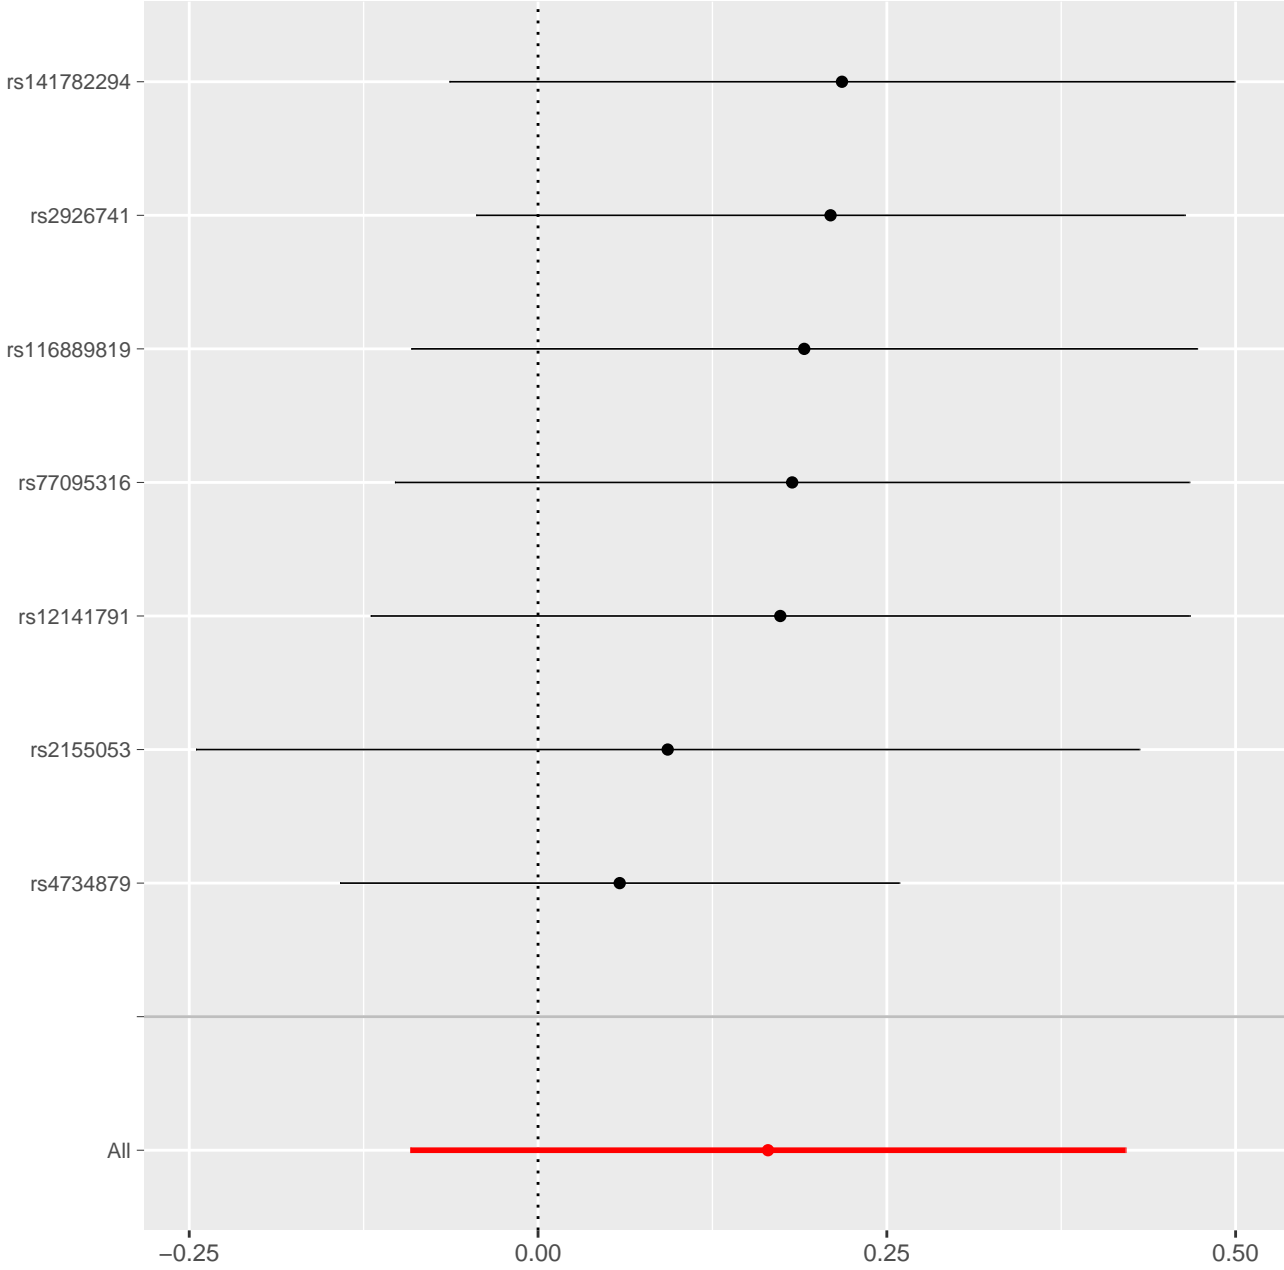

MR leave-one-out sensitivity analysis for 'Matrix metalloproteinase-1 levels || id:ebi-IPs91-GCST90274826' on 'Crohn's disease || id:ieu-a-30'

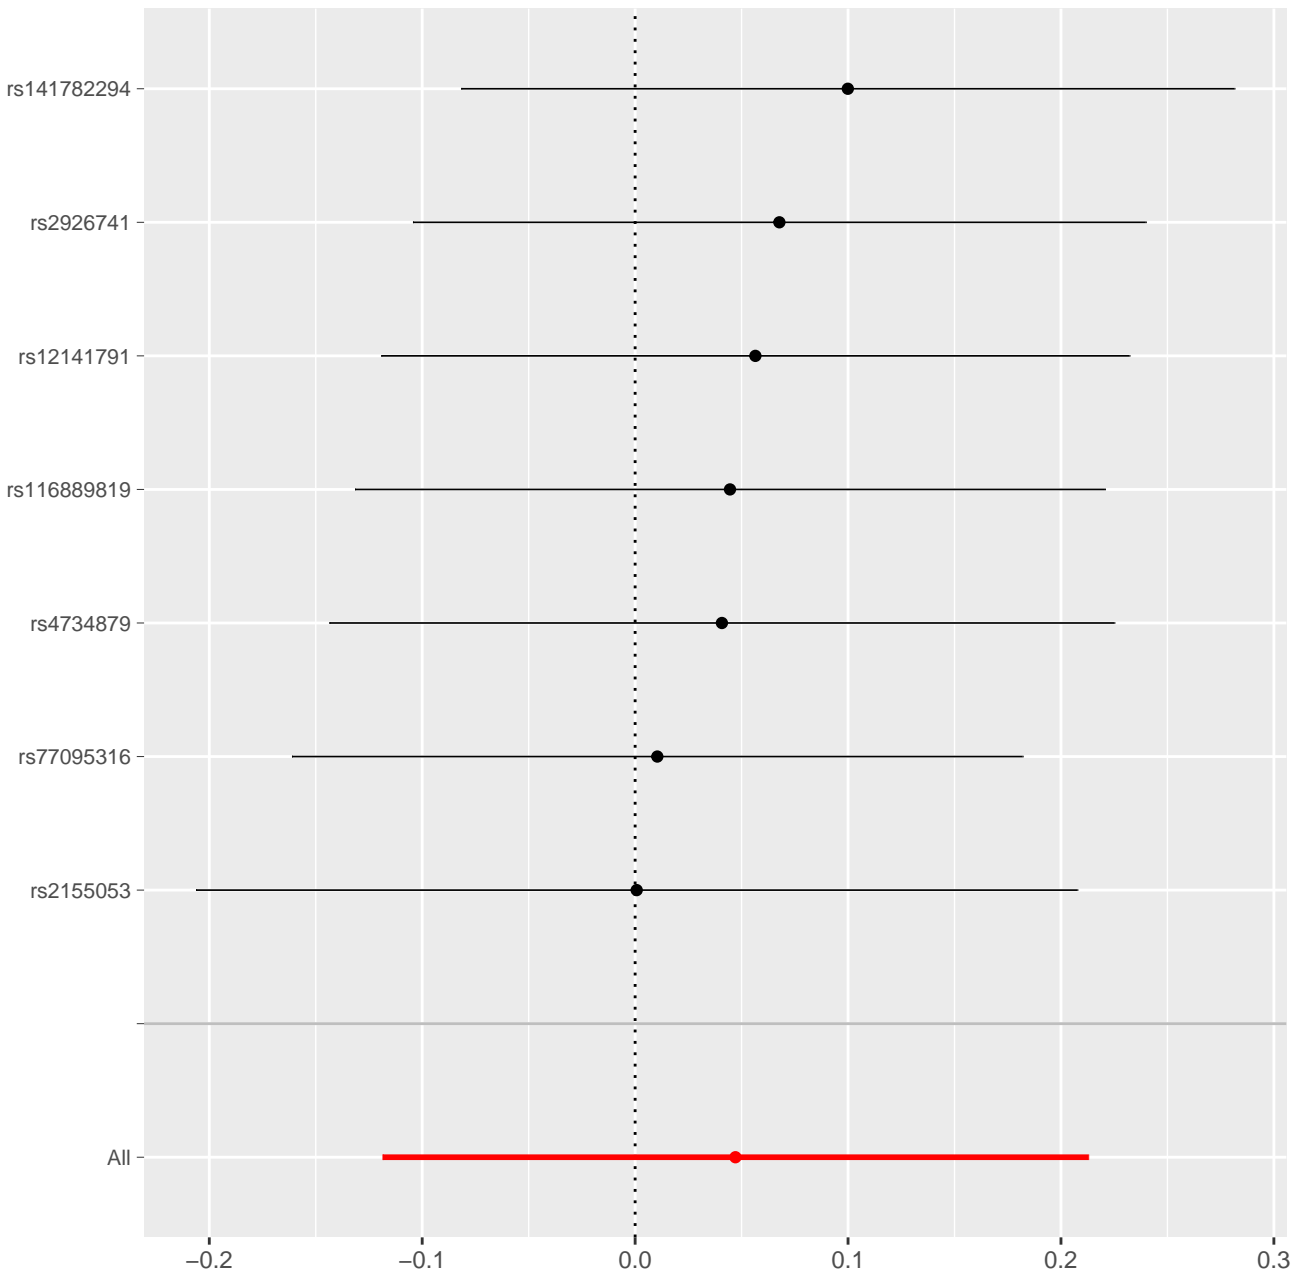

MR leave-one-out sensitivity analysis for 'Matrix metalloproteinase-1 levels || id:ebi-IPs91-GCST90274826' on 'Ulcerative colitis || id:ieu-a-32'

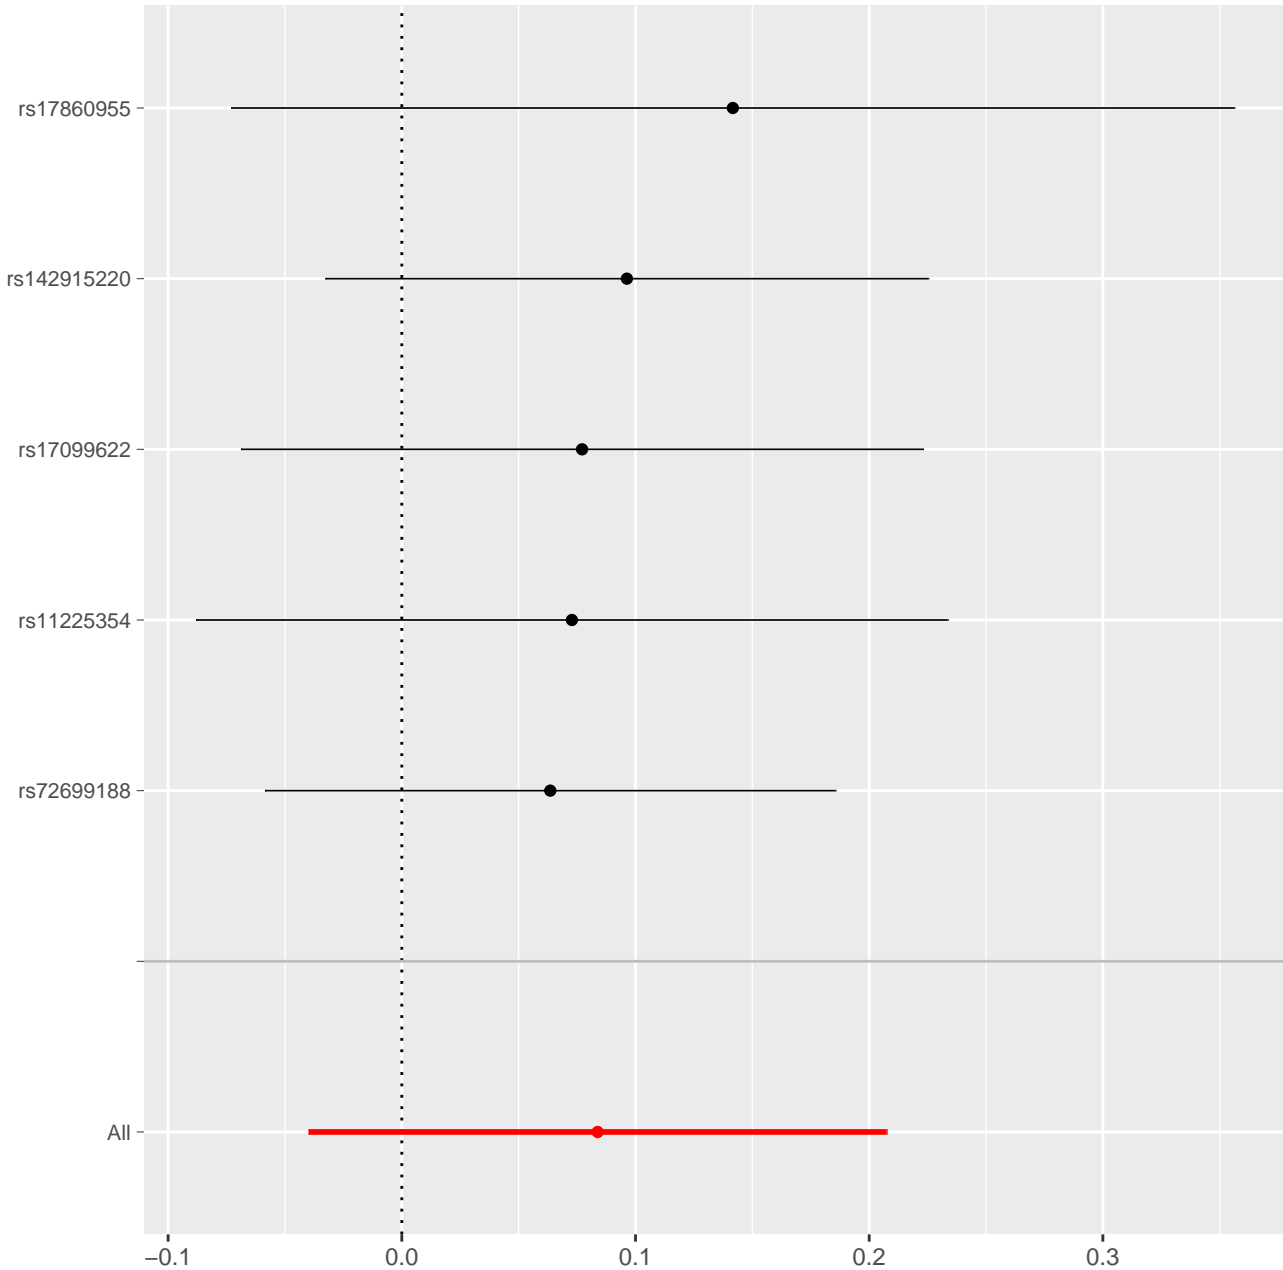

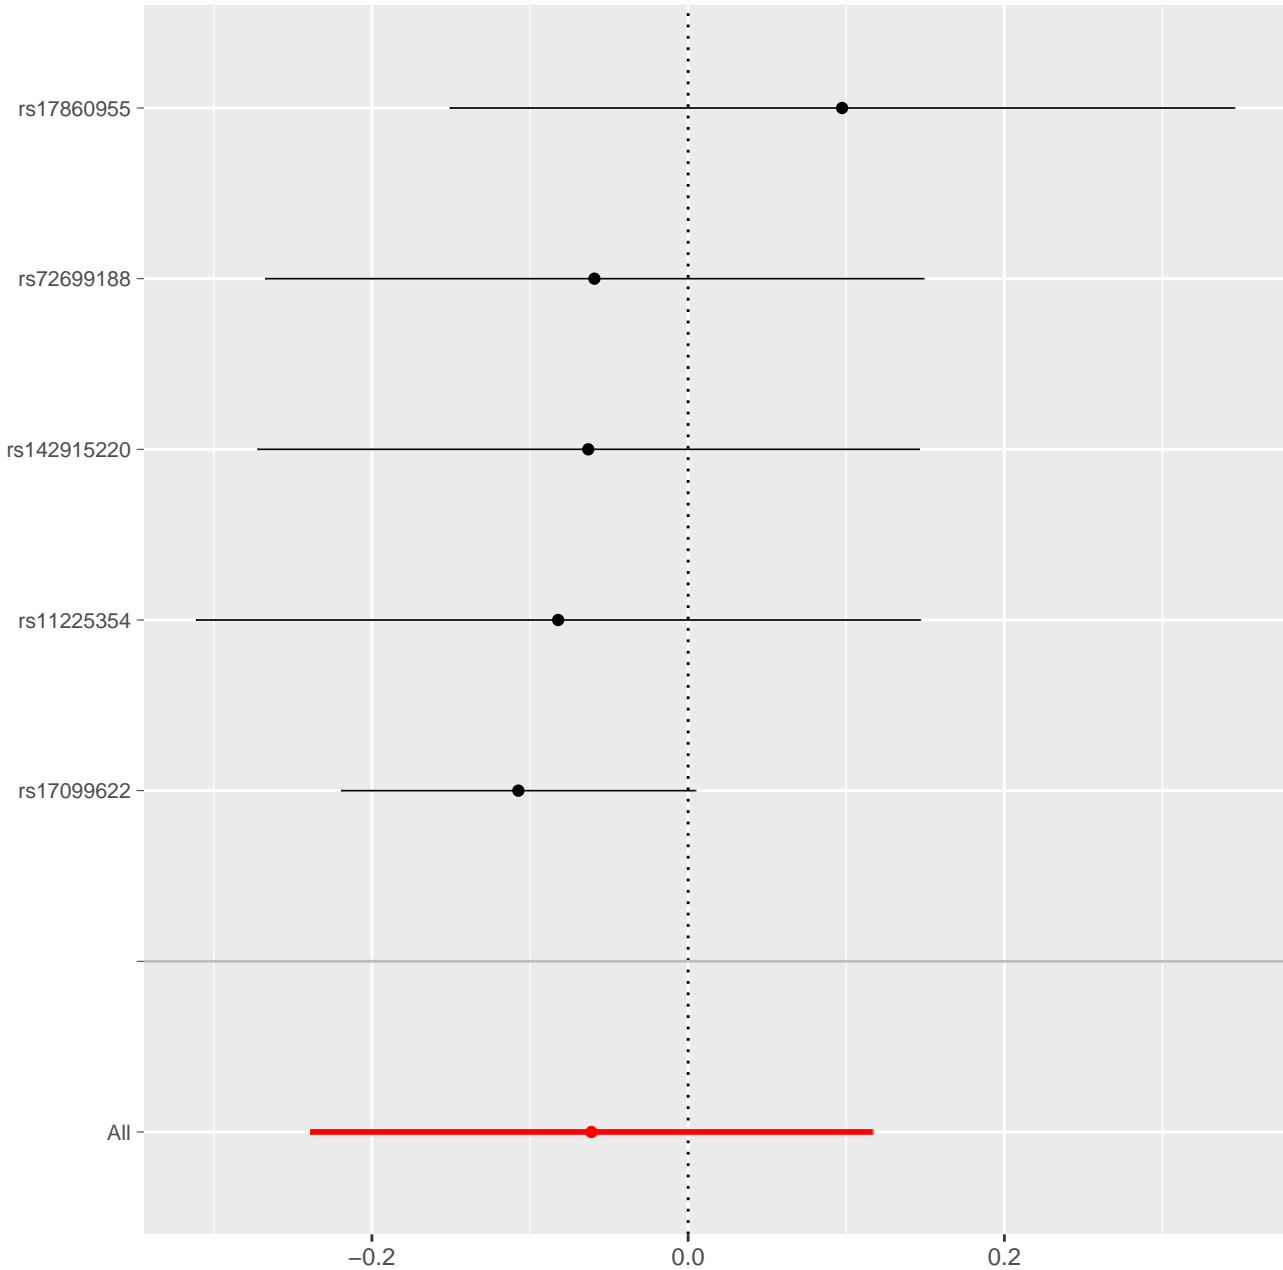

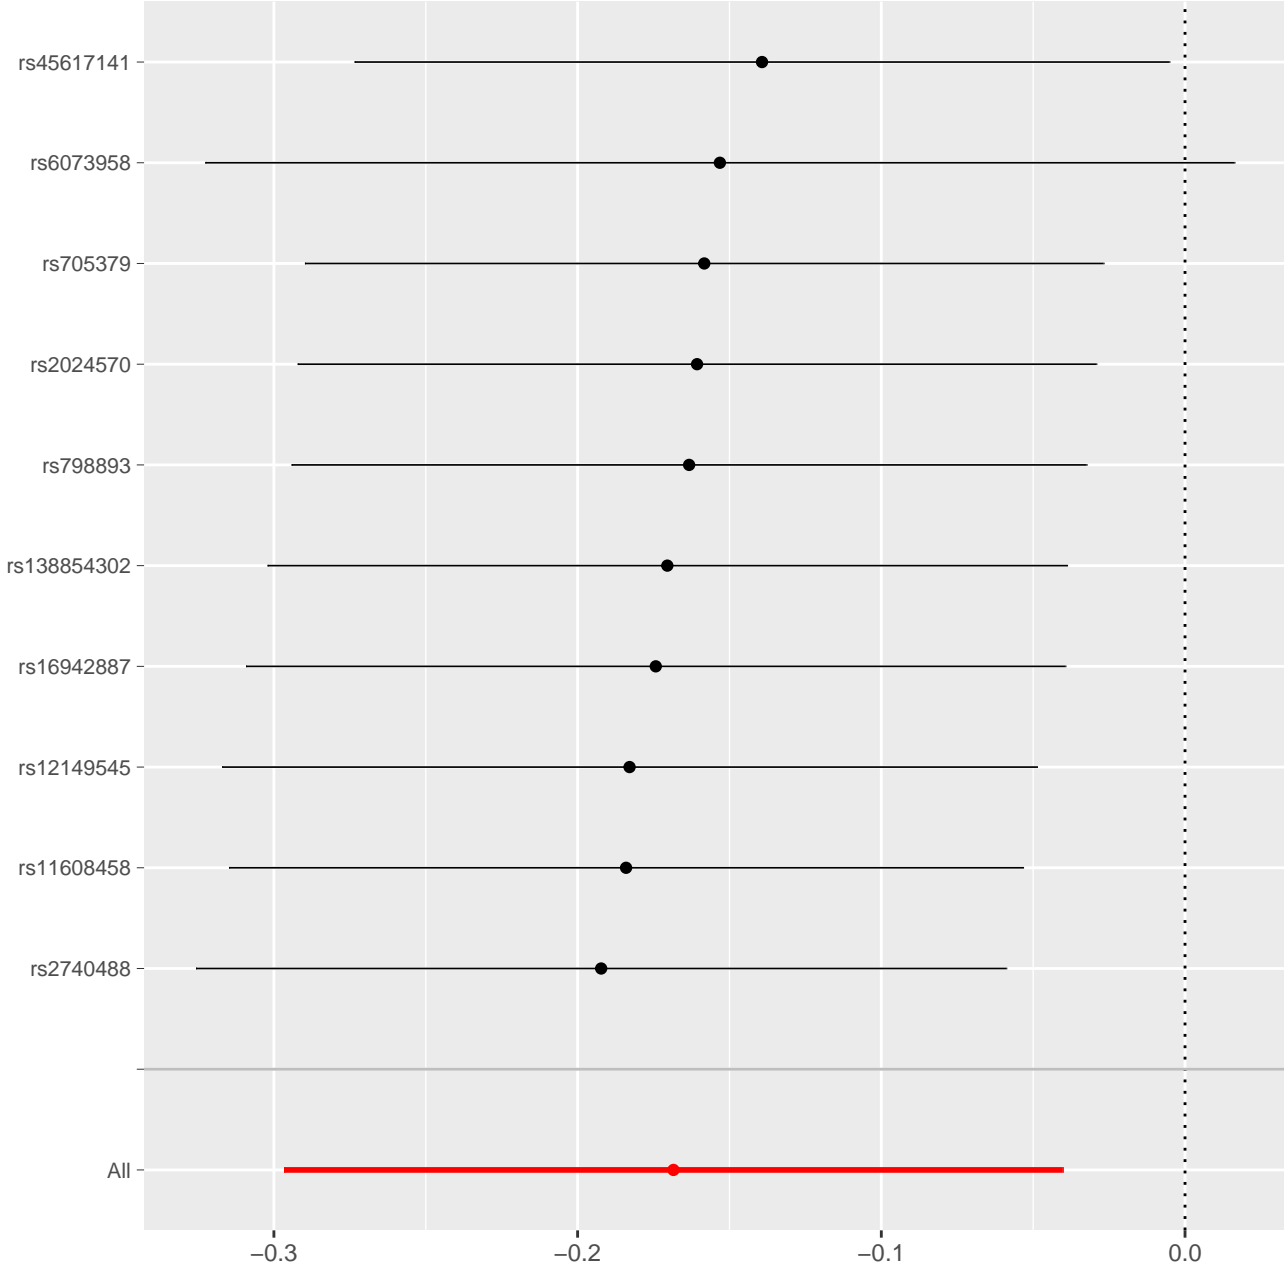

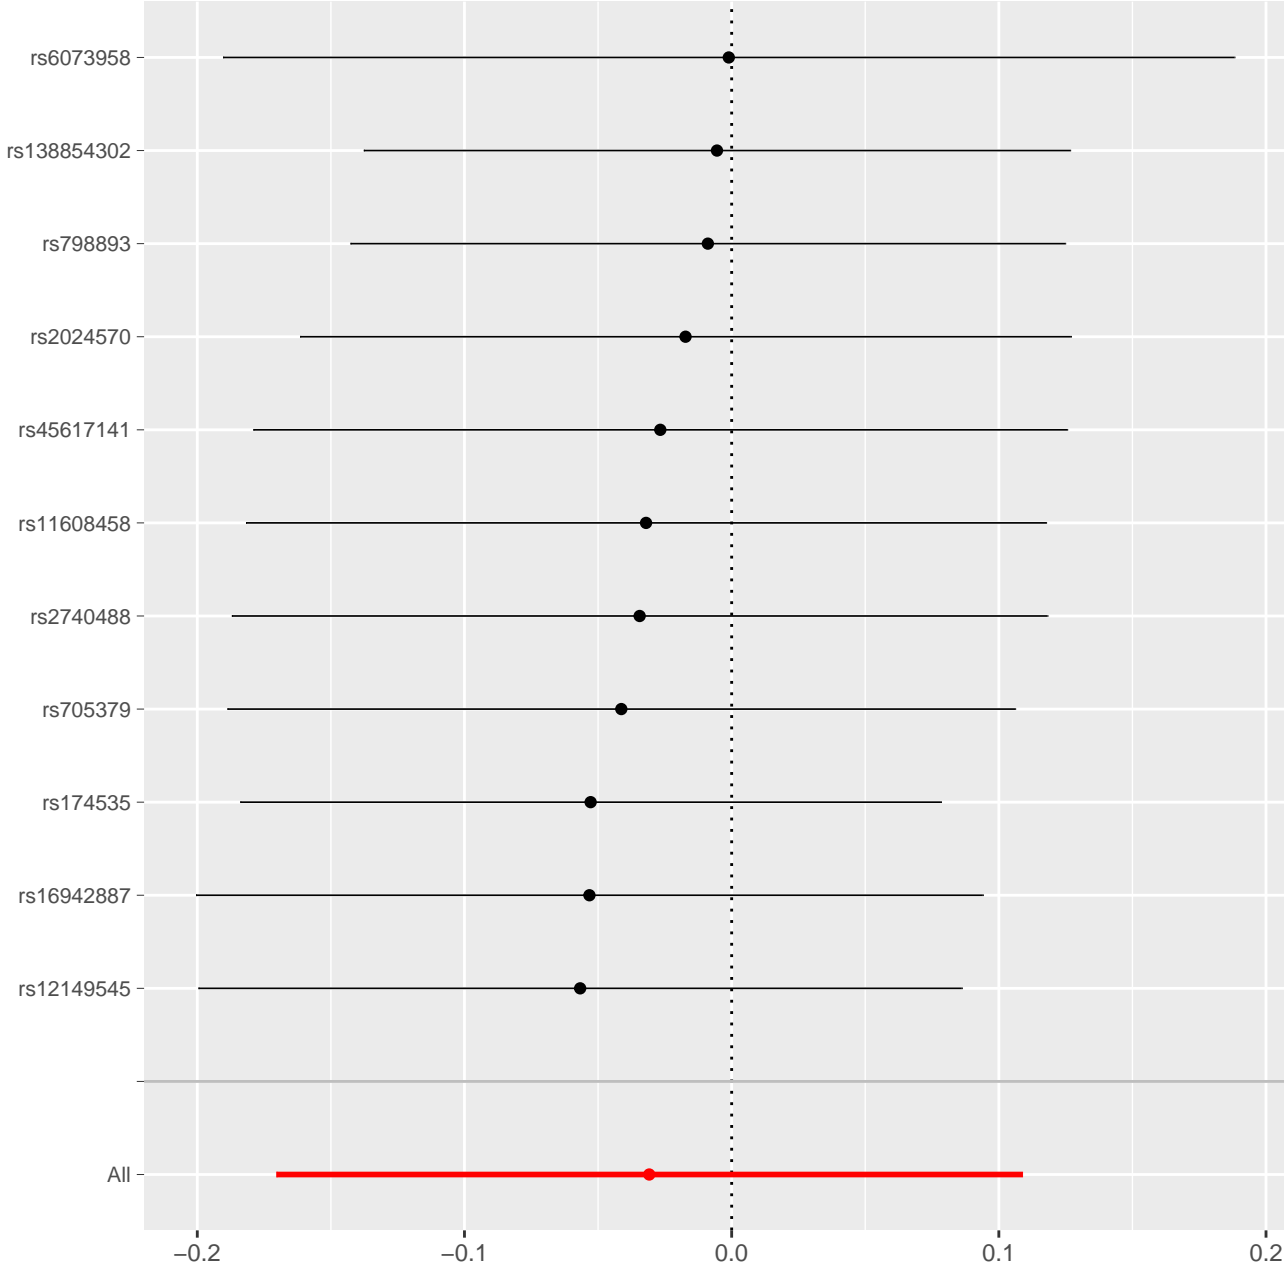

rs12058421

rs10212190

rs2790462

rs56244095

rs60094514

All

-0.4

-0.2

0.0

0.2

MR leave-one-out sensitivity analysis for  
'Signaling lymphocytic activation molecule levels || id:ebi-IPs91-GCST90274835' on 'Crohn's disease || id:ieu-a-30'

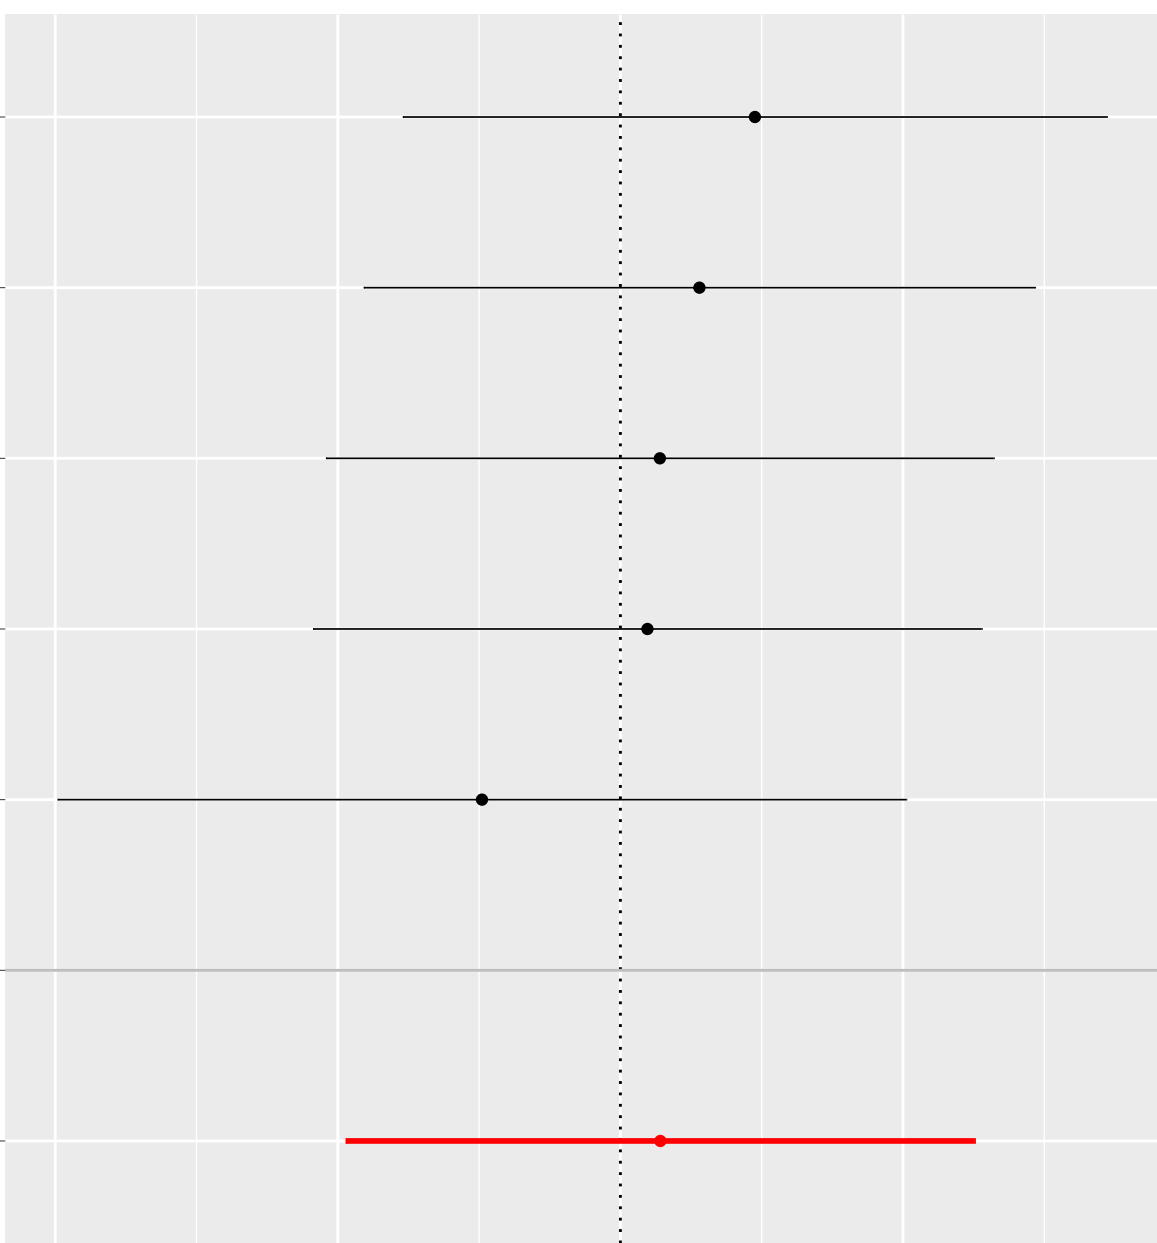

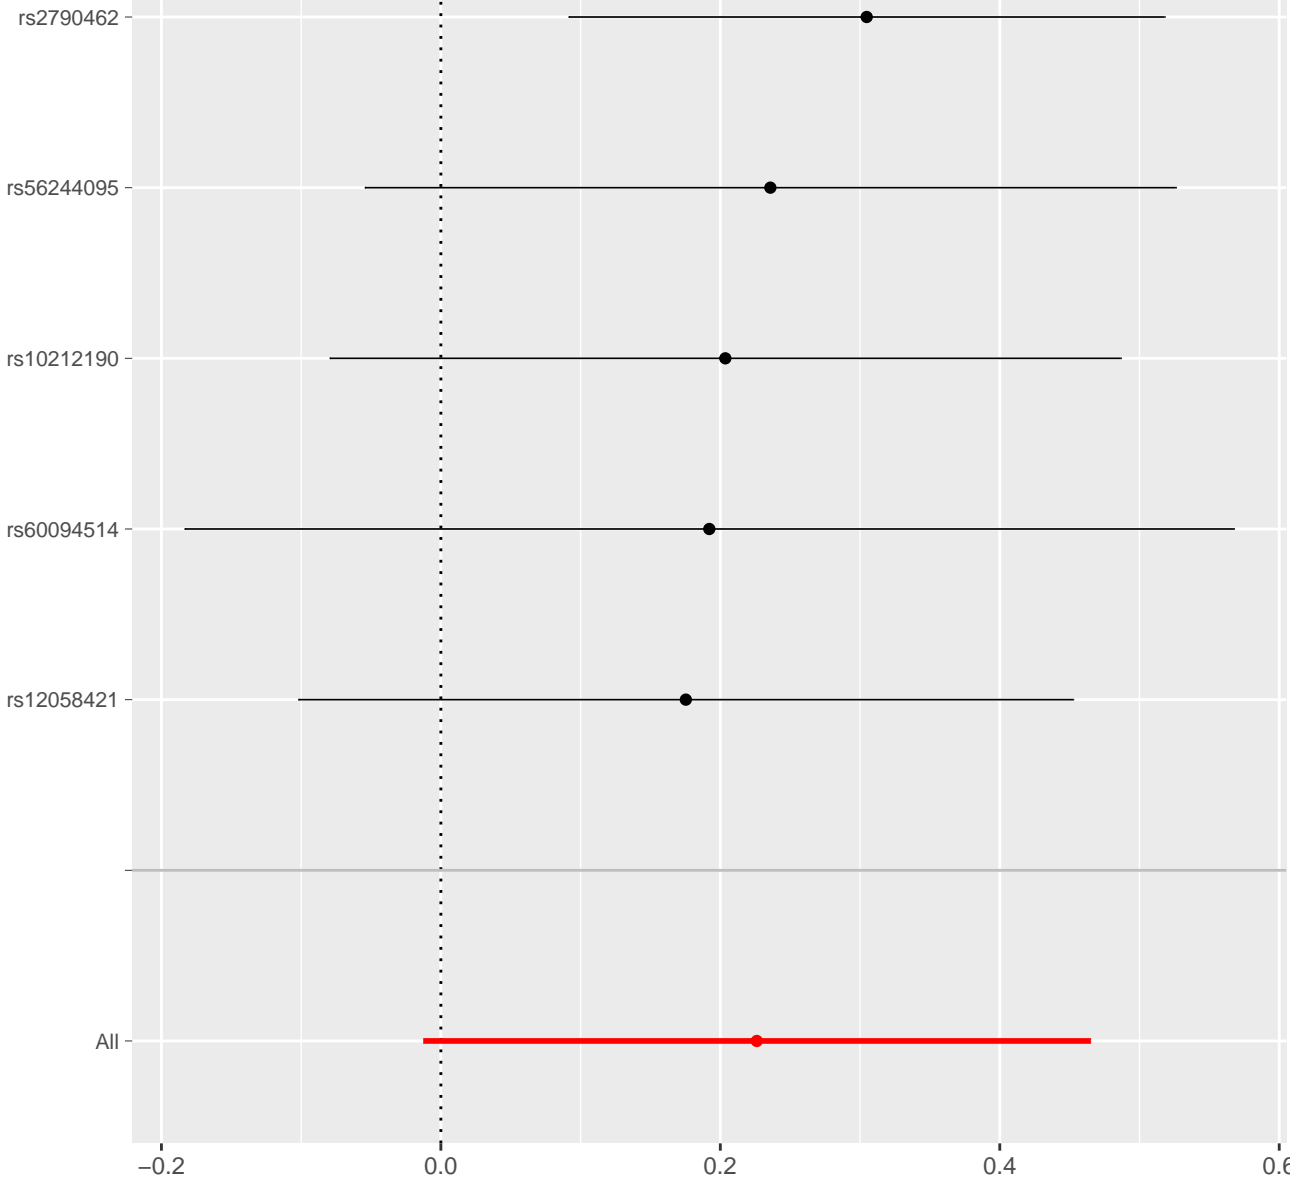



rs149278

rs2731674

rs66530140

All

-0.4

-0.2

0.0

MR leave-one-out sensitivity analysis for  
'Sulfotransferase 1A1 levels || id:ebi-IPs91-GCST90274836' on 'Ulcerative colitis || id:ieu-a-32'

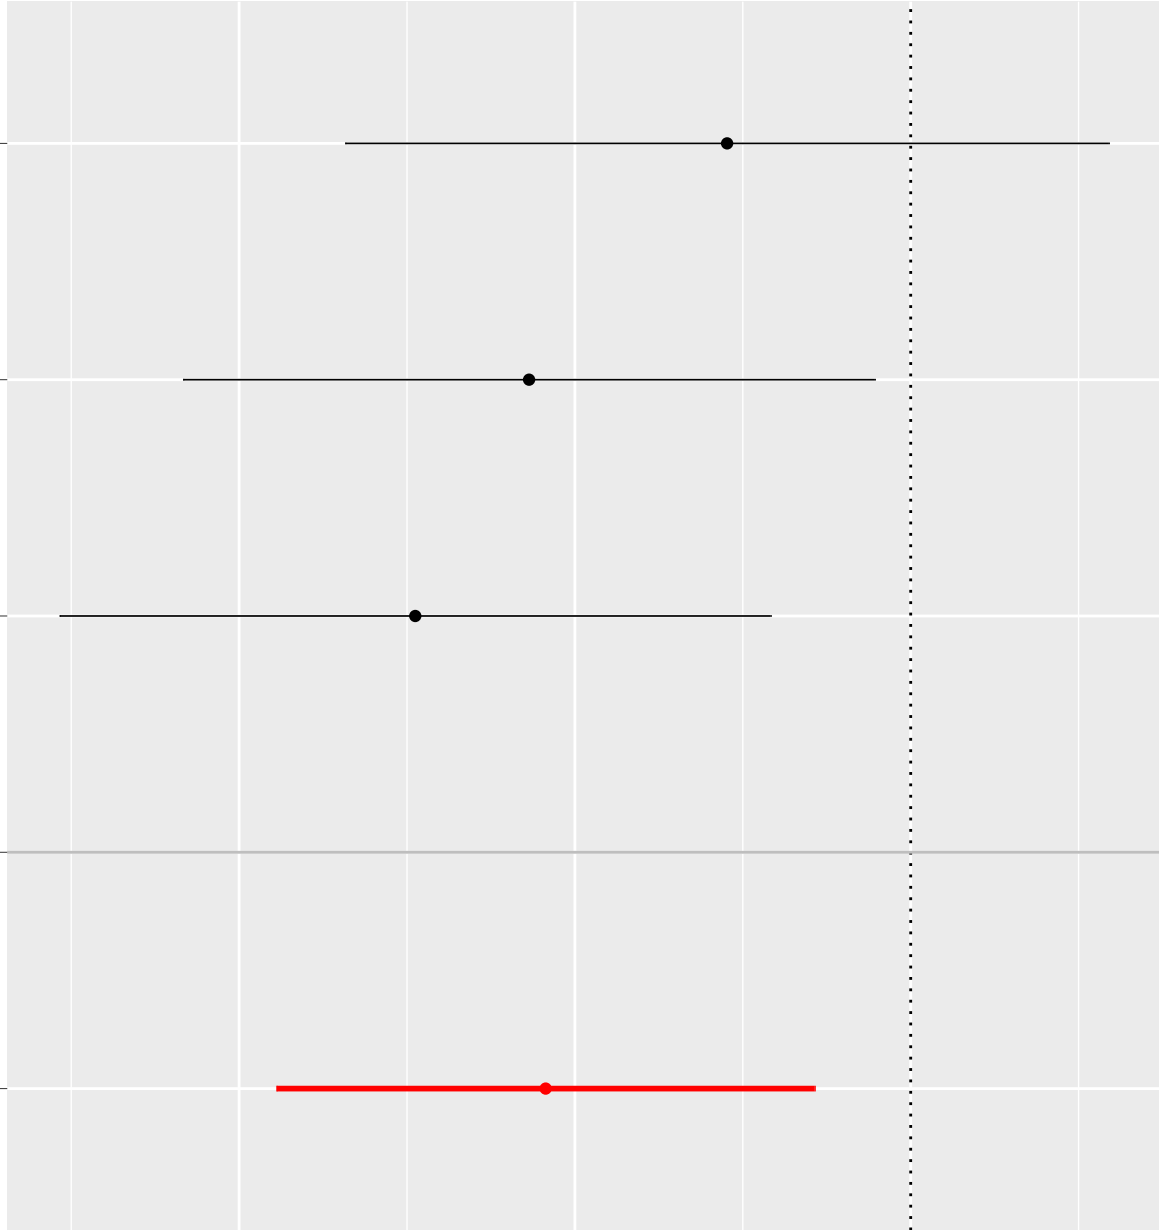

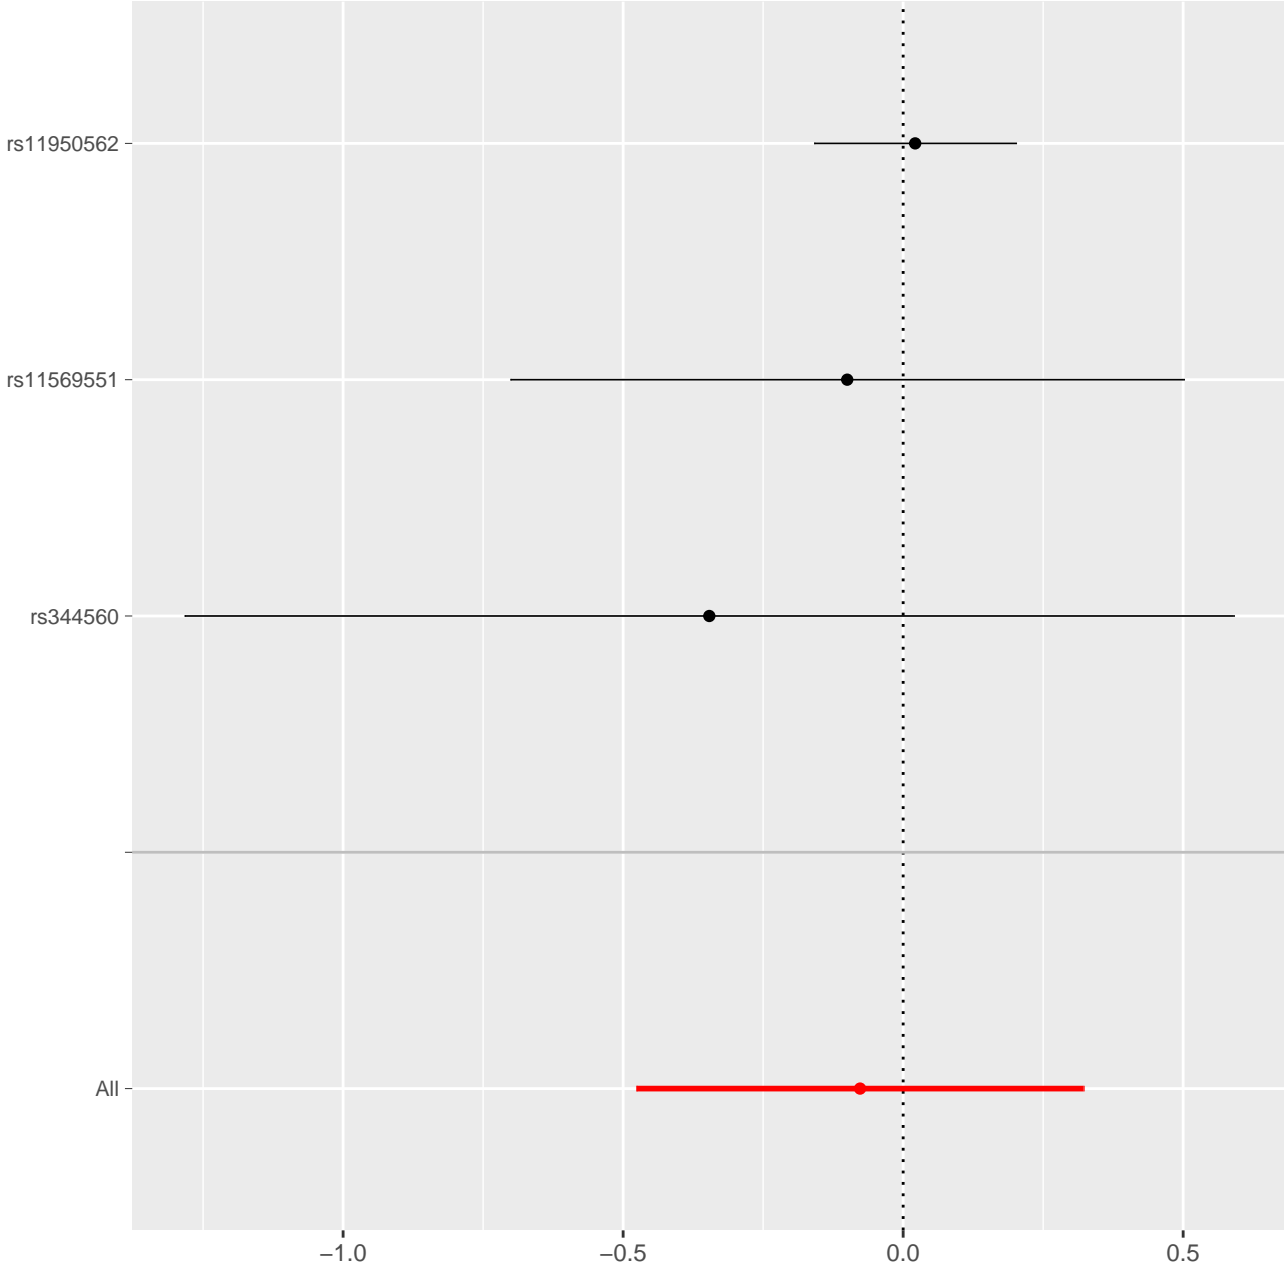

'Tumor necrosis factor ligand superfamily member 14 levels || id:ebi-IPs91-GCST90274842' on 'Ulcerative colitis || id:ieu-a-32'

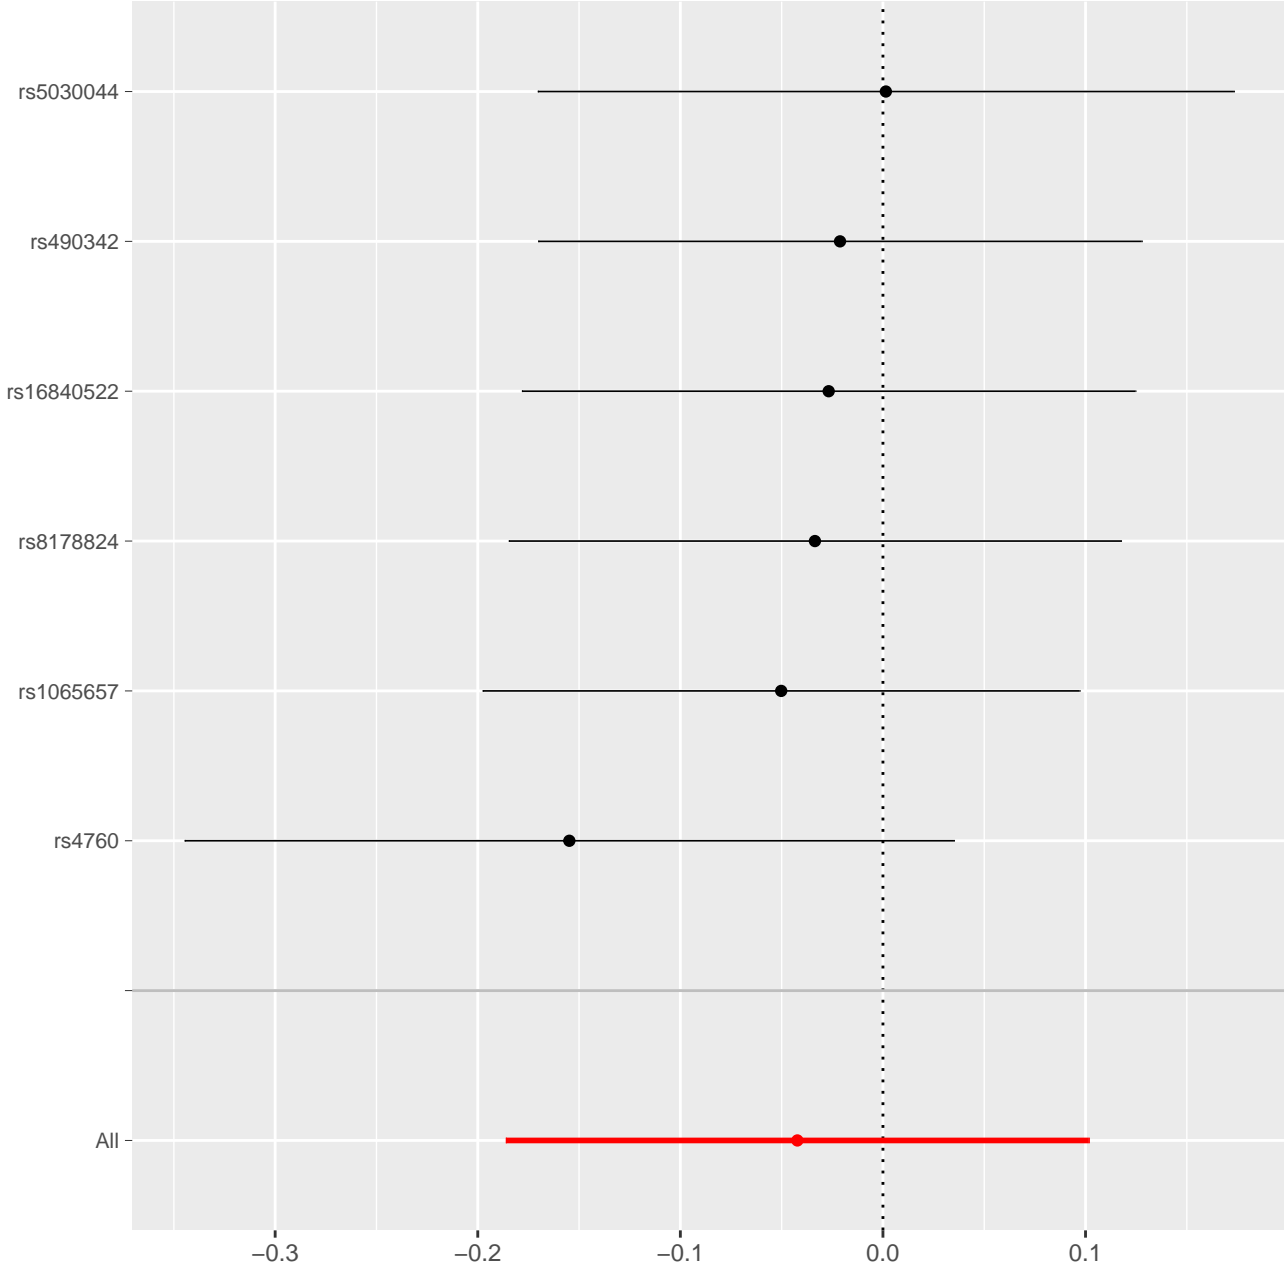

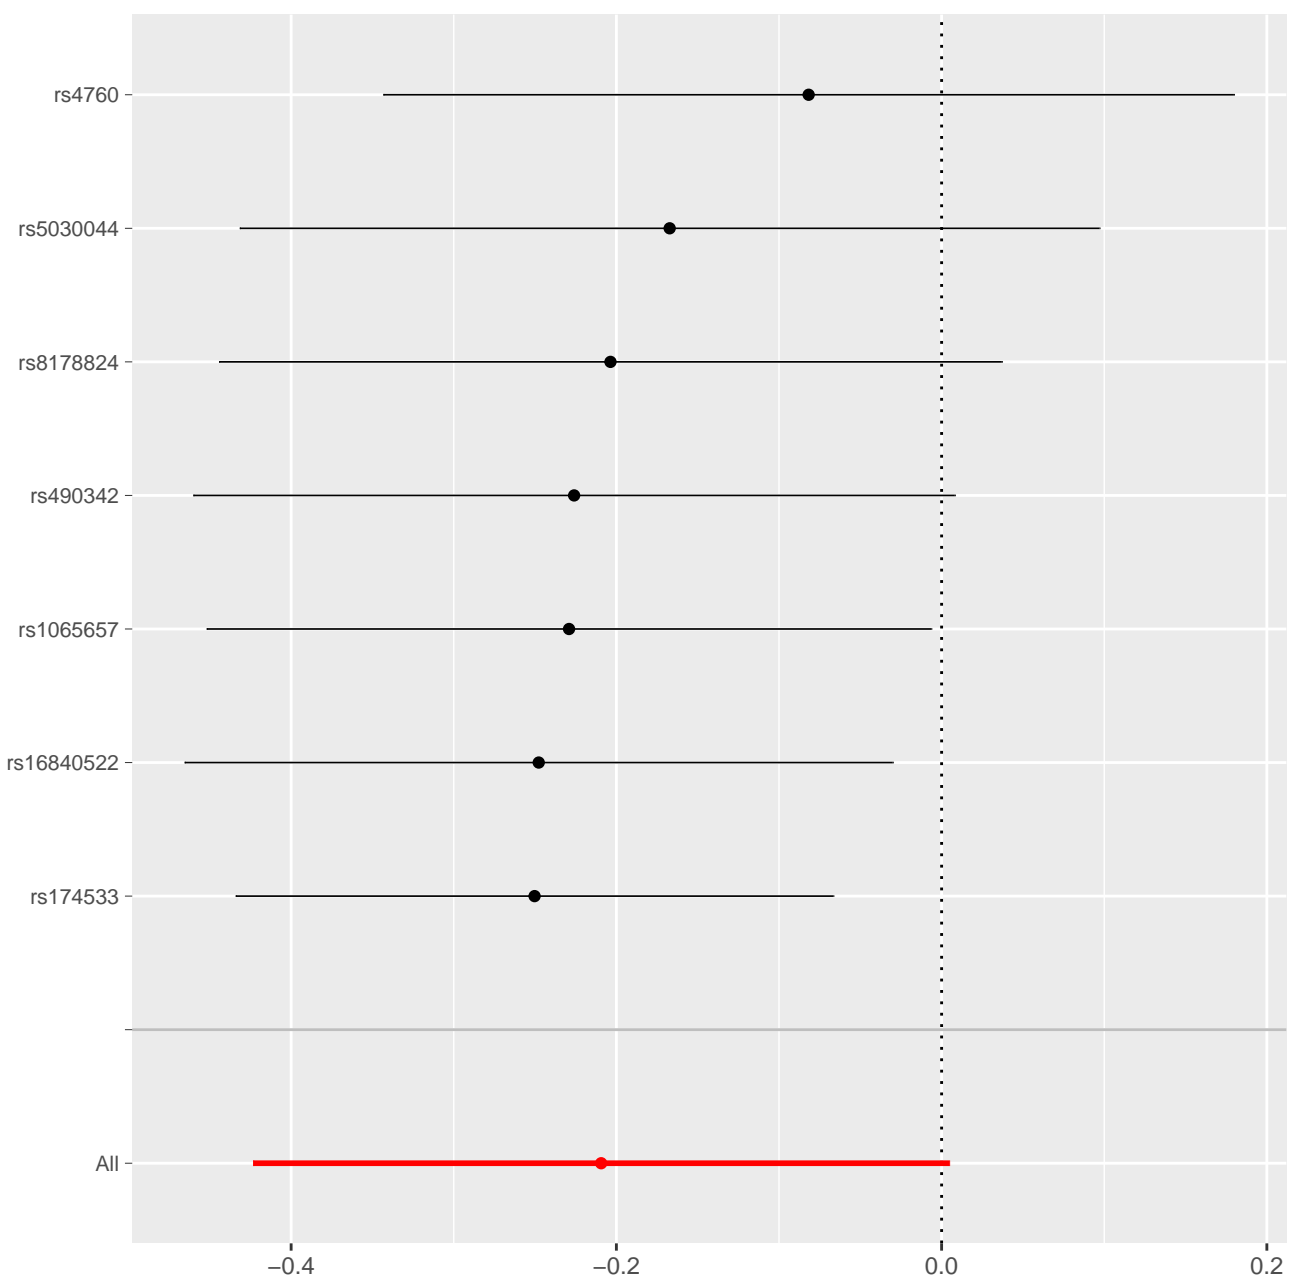

MR leave-one-out sensitivity analysis for 'TNF-related apoptosis-inducing ligand levels || id:ebi-IPs91-GCST90274843' on 'Ulcerative colitis || id:ieu-a-32'

rs2468187

rs79287178

rs704

rs11713634

rs62501135

All

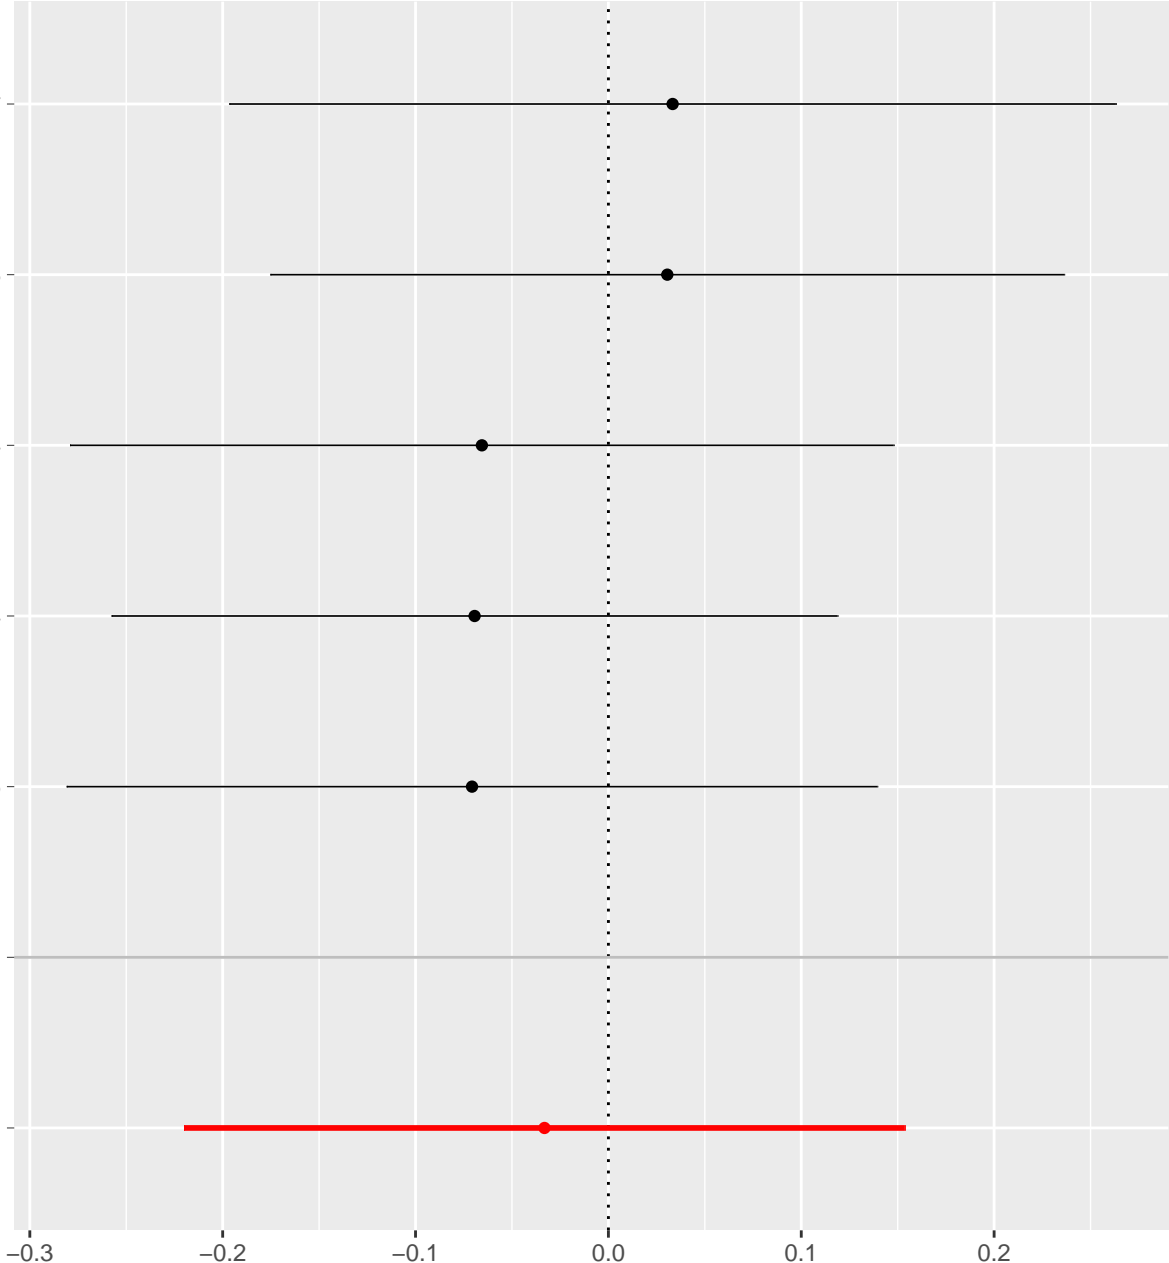

MR leave-one-out sensitivity analysis for 'TNF-related activation-induced cytokine levels || id:ebi-IPs91-GCST90274844' on 'Crohn's disease || id:ieu-a-30'

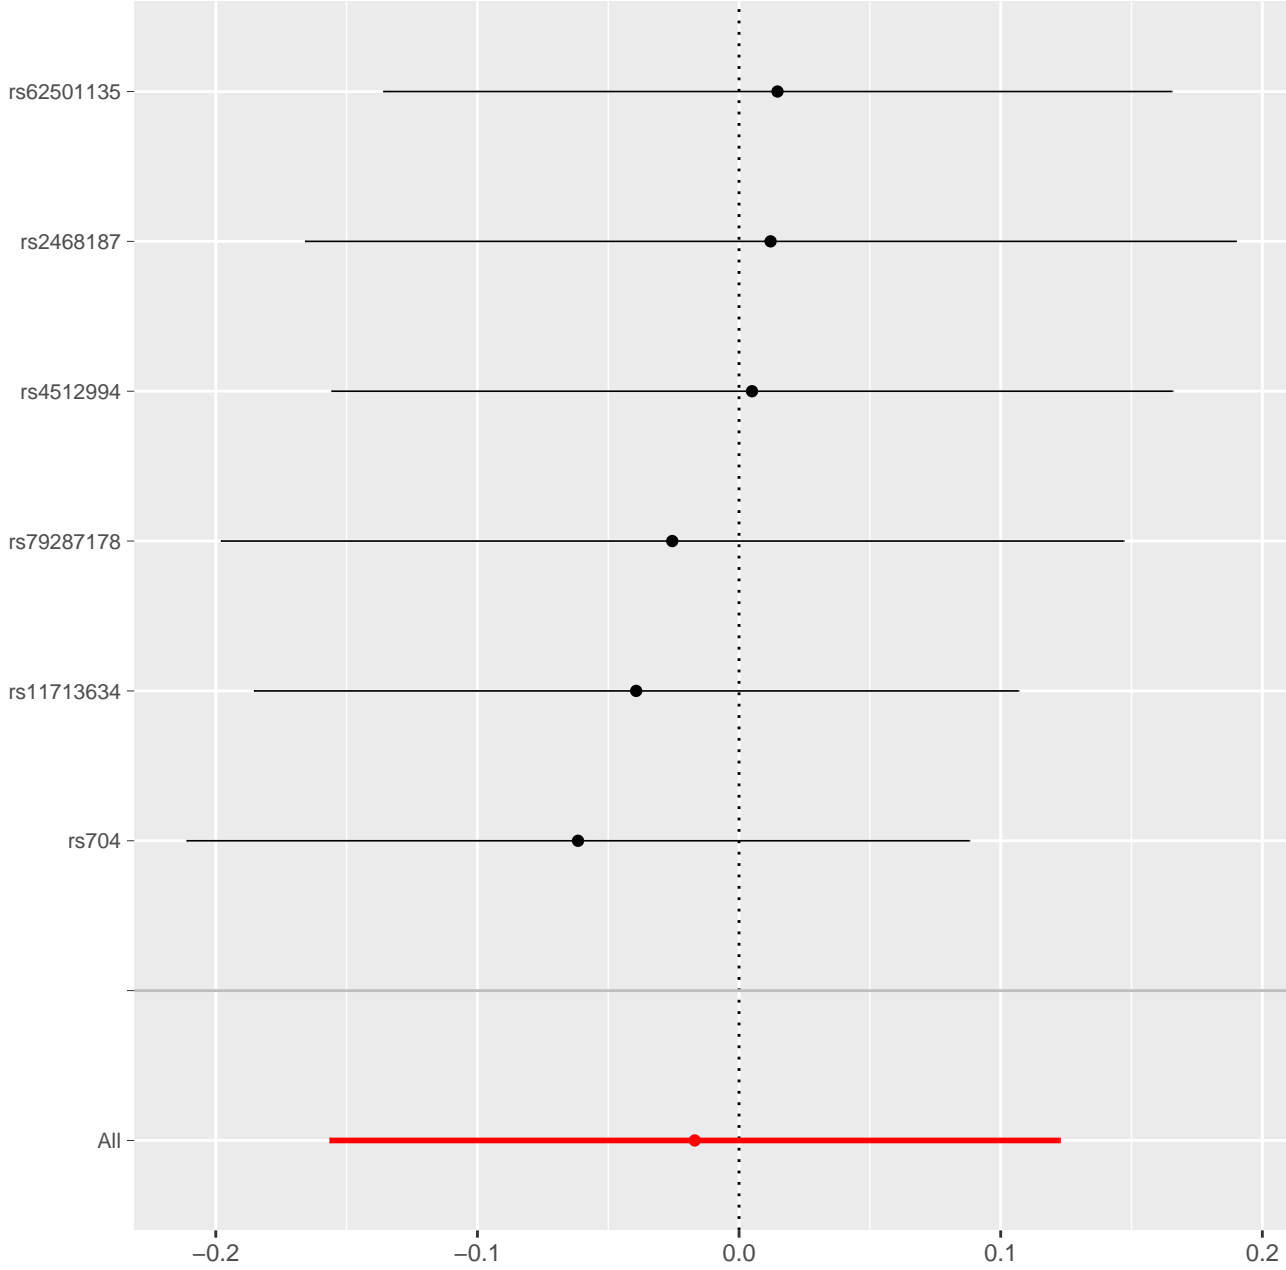

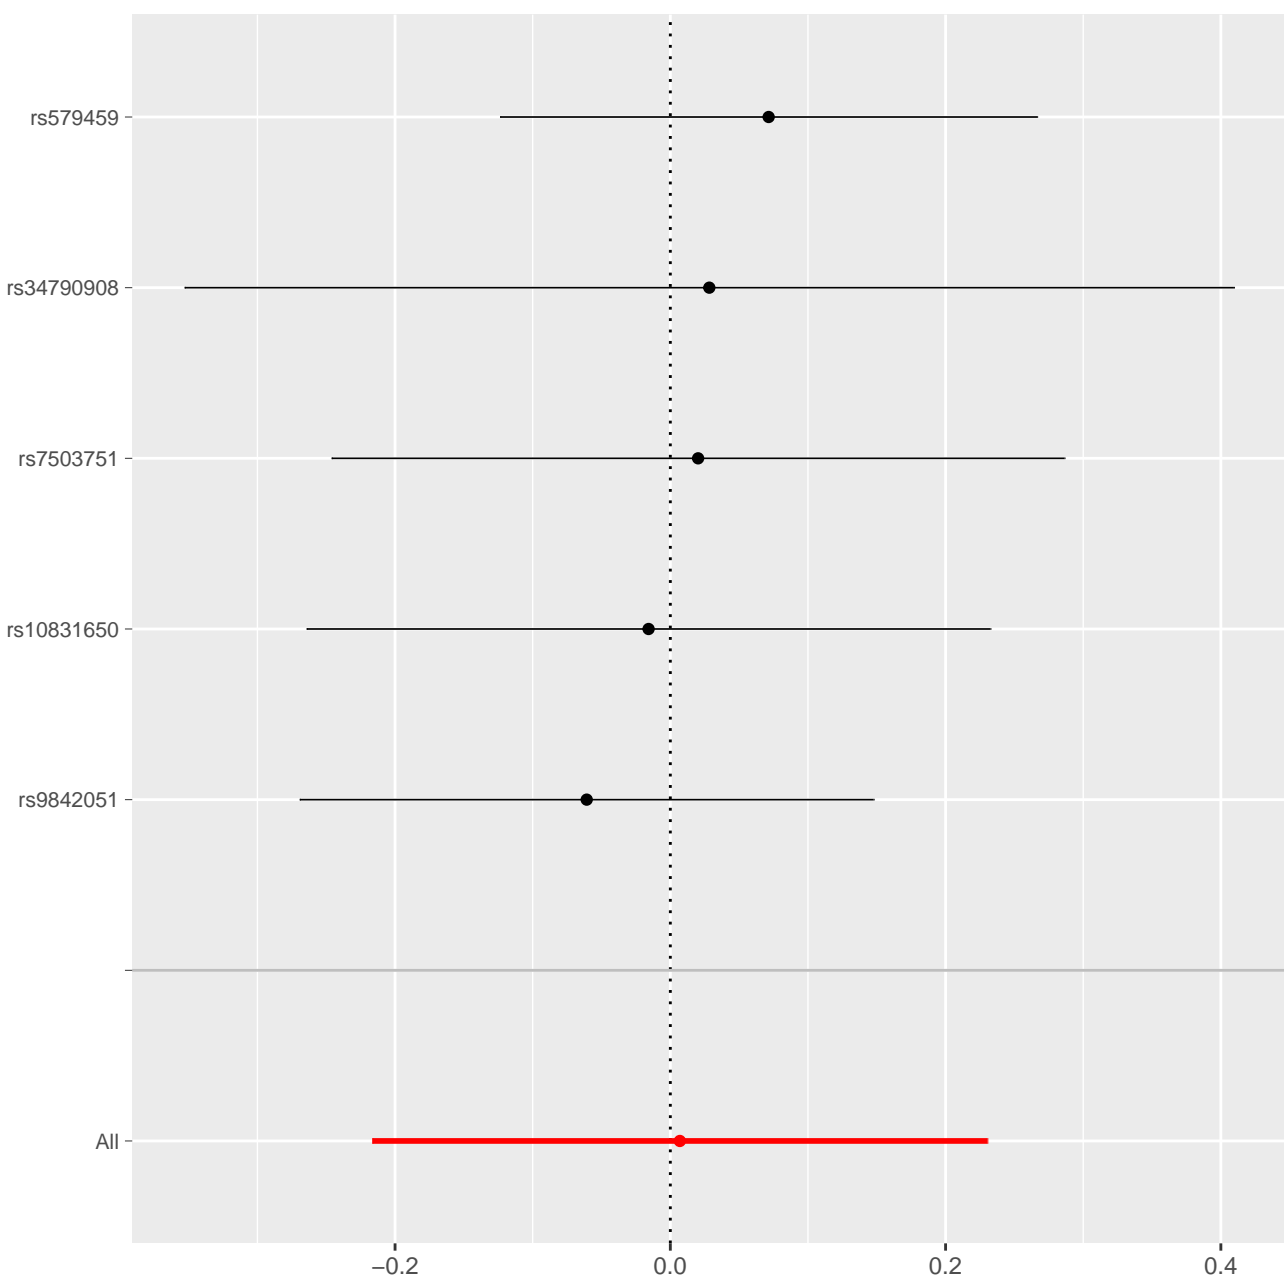

MR leave-one-out sensitivity analysis for 'Tumor necrosis factor ligand superfamily member 12 levels || id:ebi-IPs91-GCST90274846' on 'Crohn's disease || id:ieu-a-30'

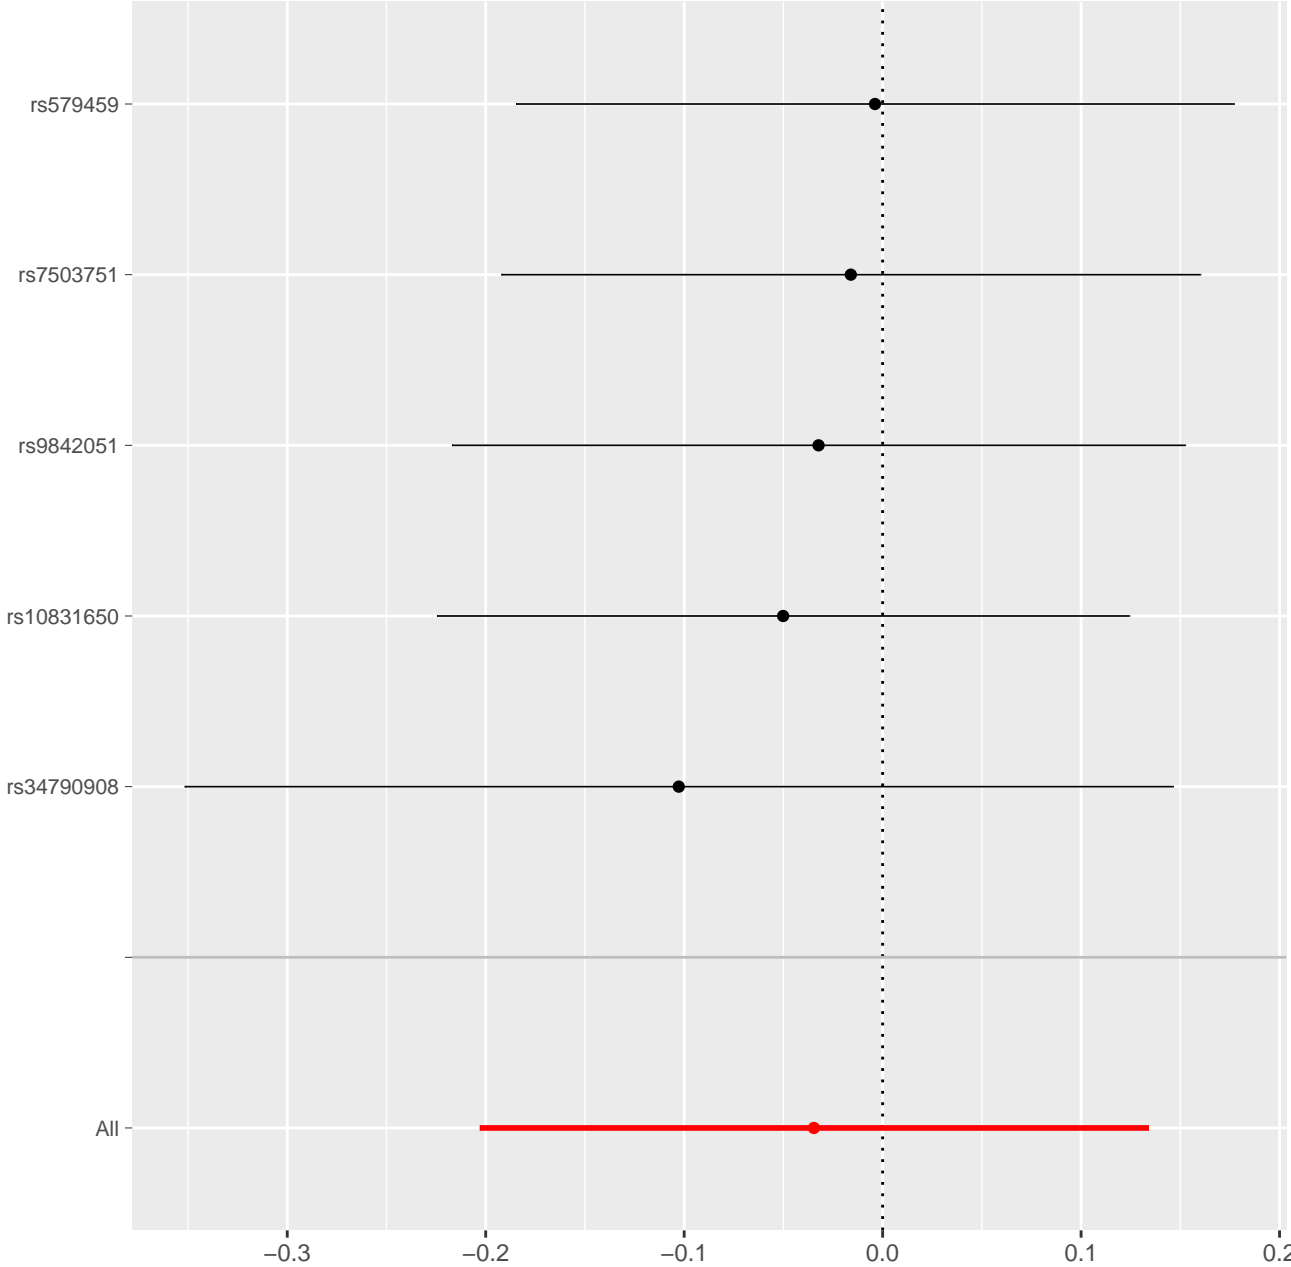



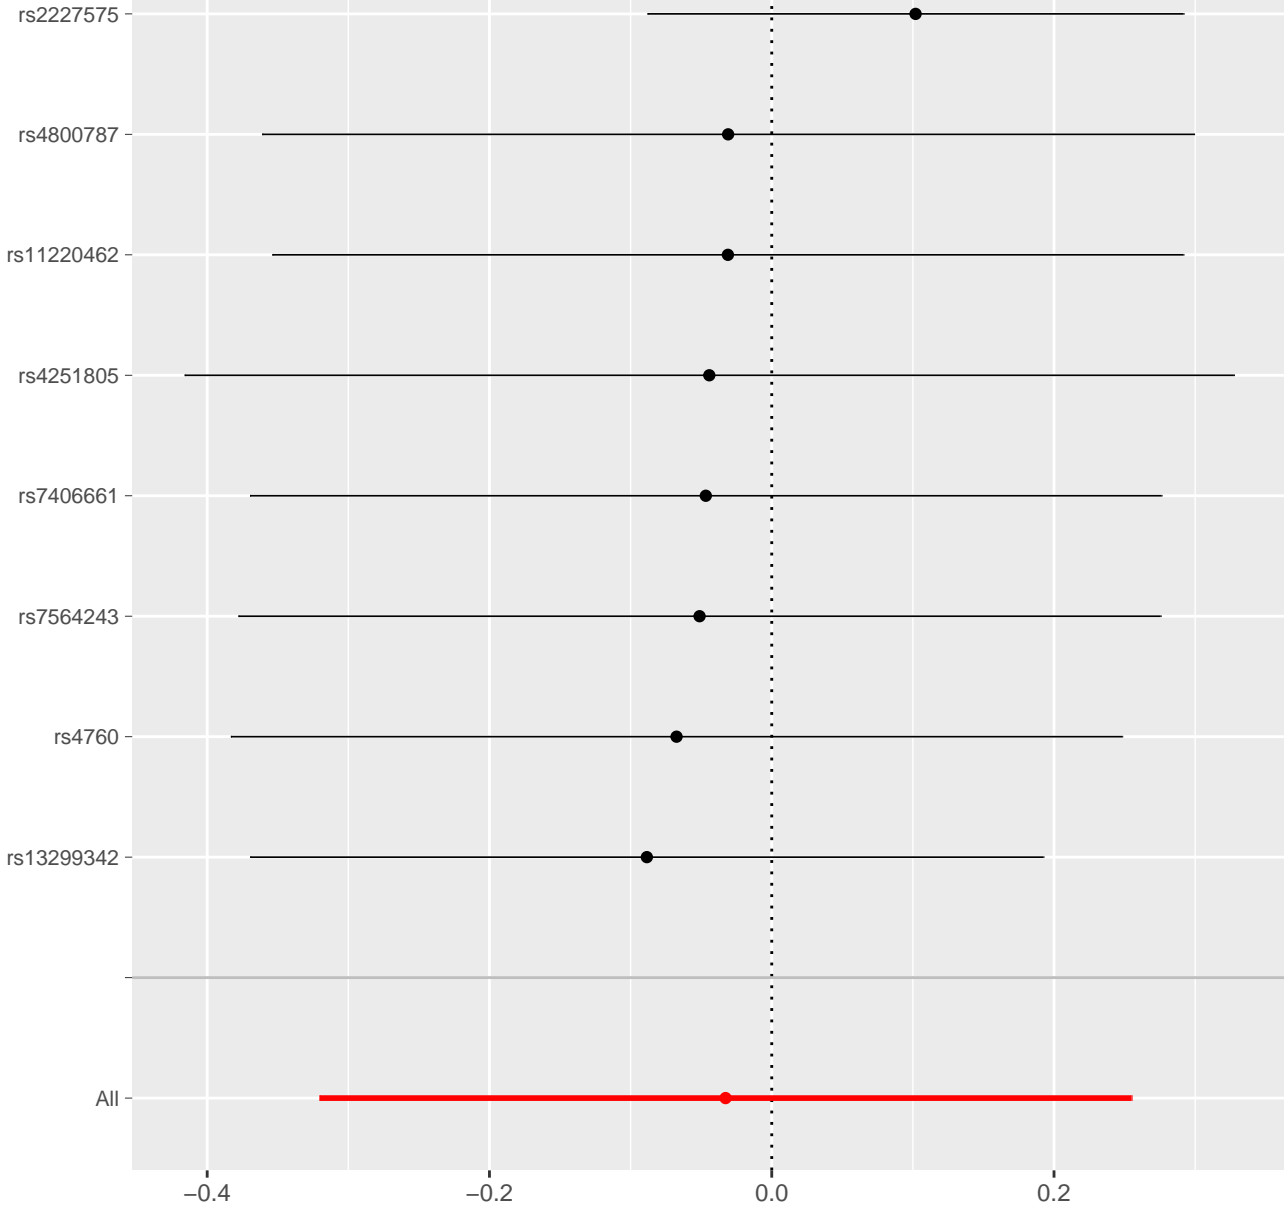

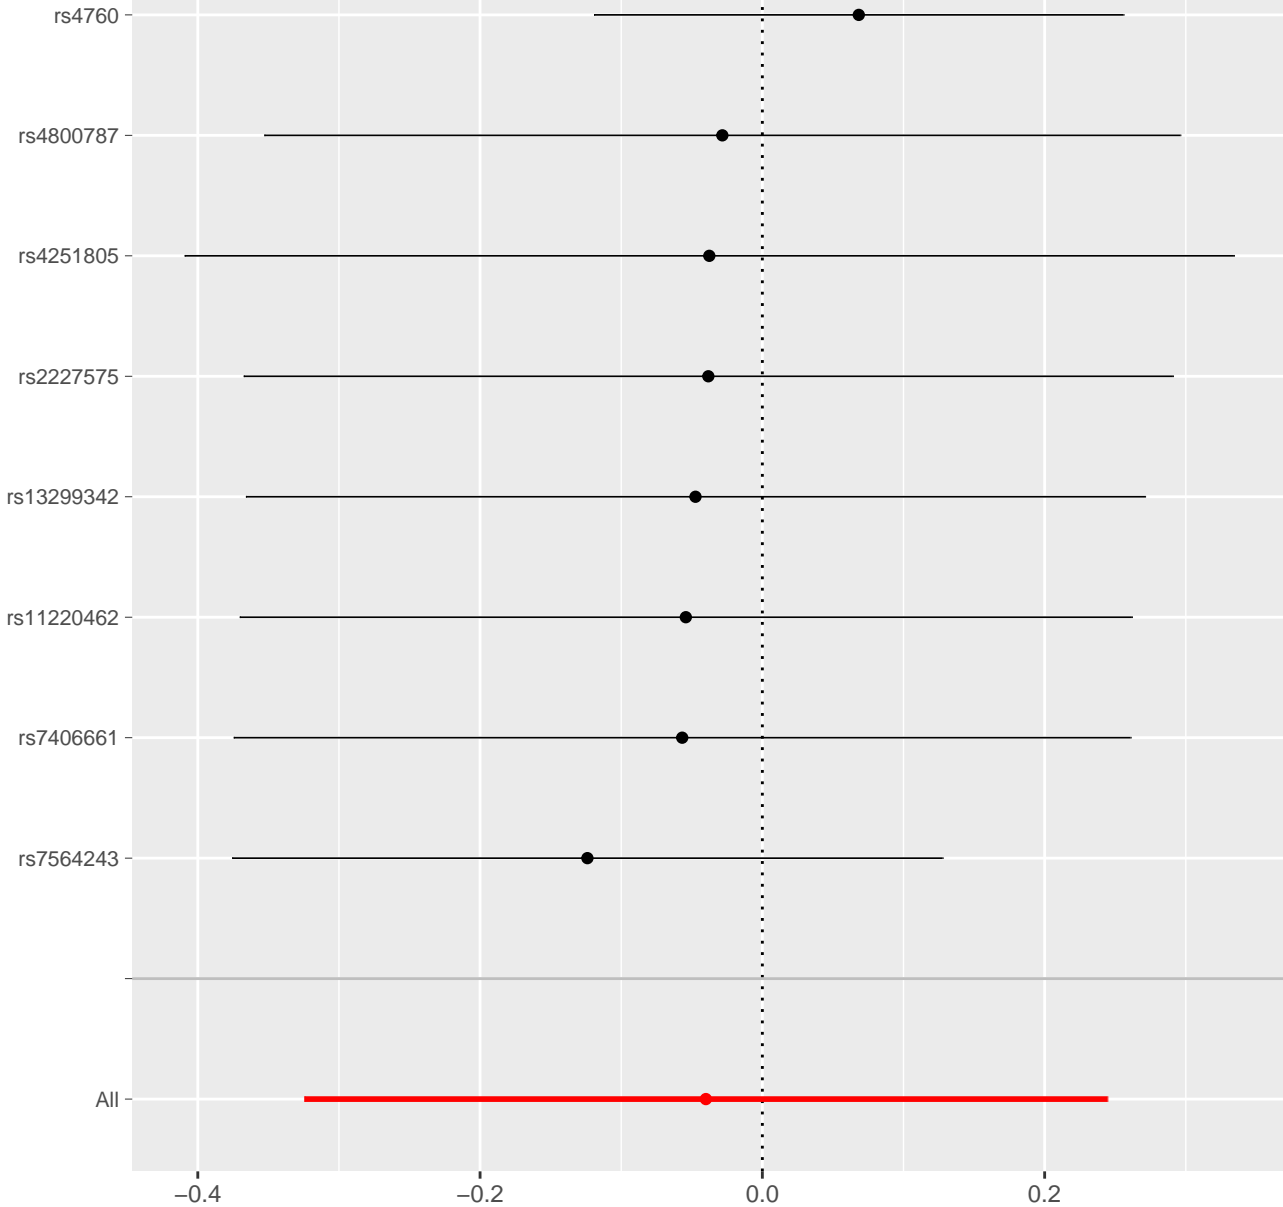

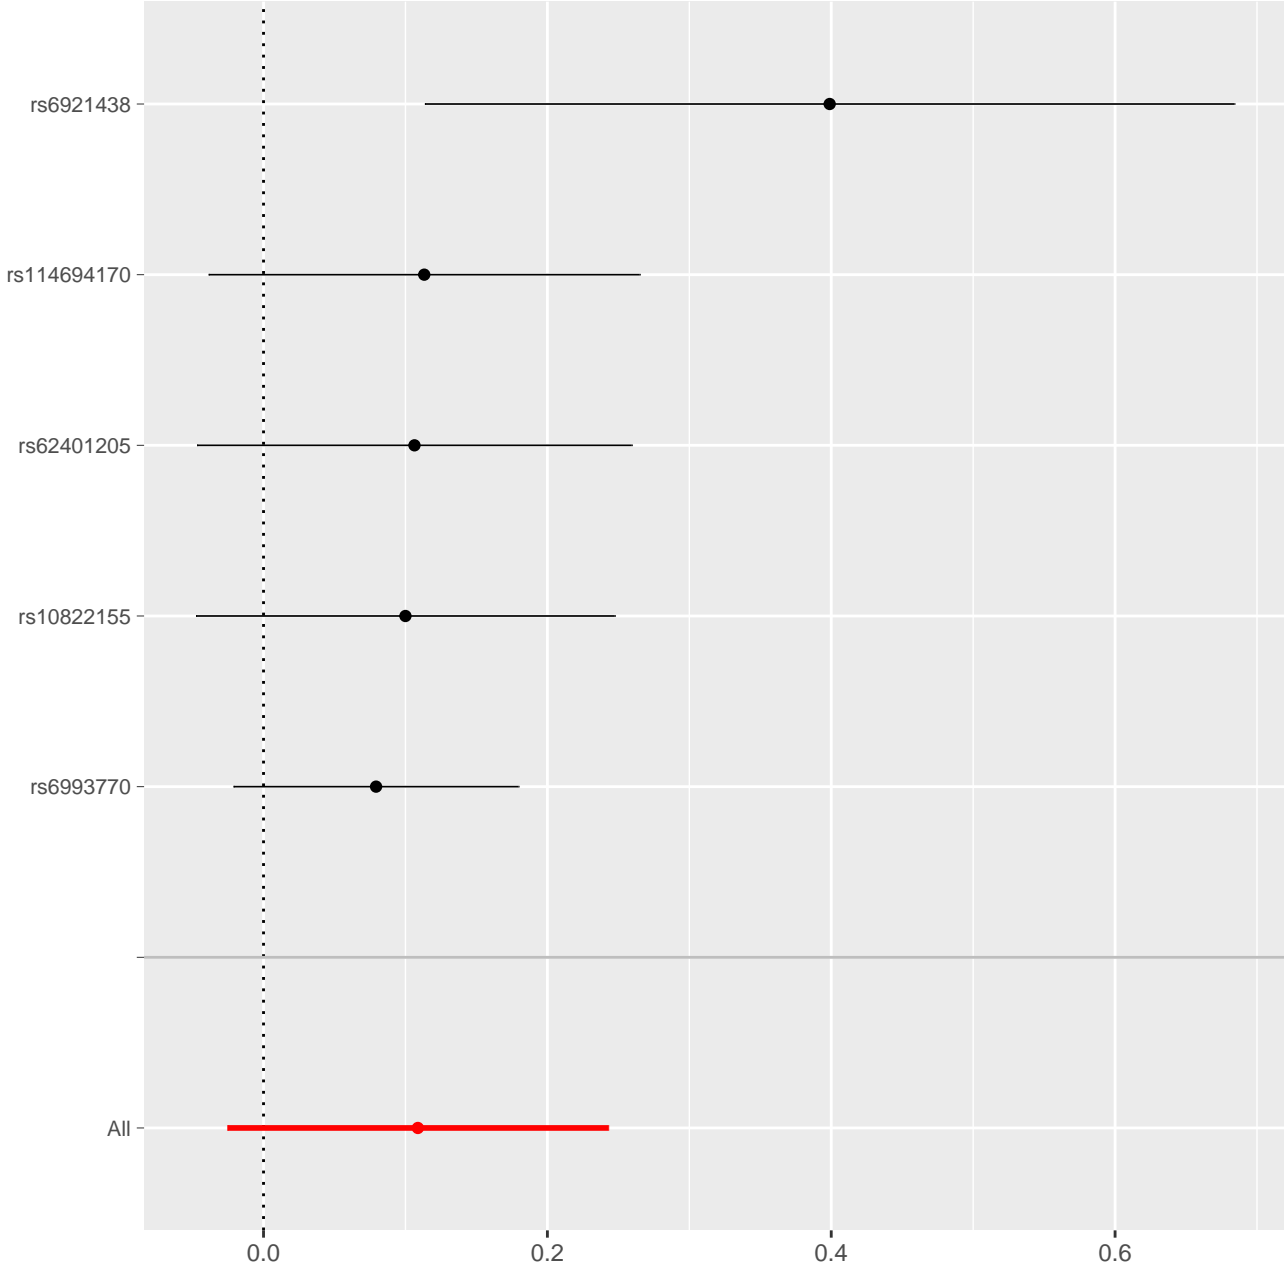

MR leave-one-out sensitivity analysis for 'Vascular endothelial growth factor A levels || id:ebi-IPs91-GCST90274848' on 'Crohn's disease || id:ieu-a-30'

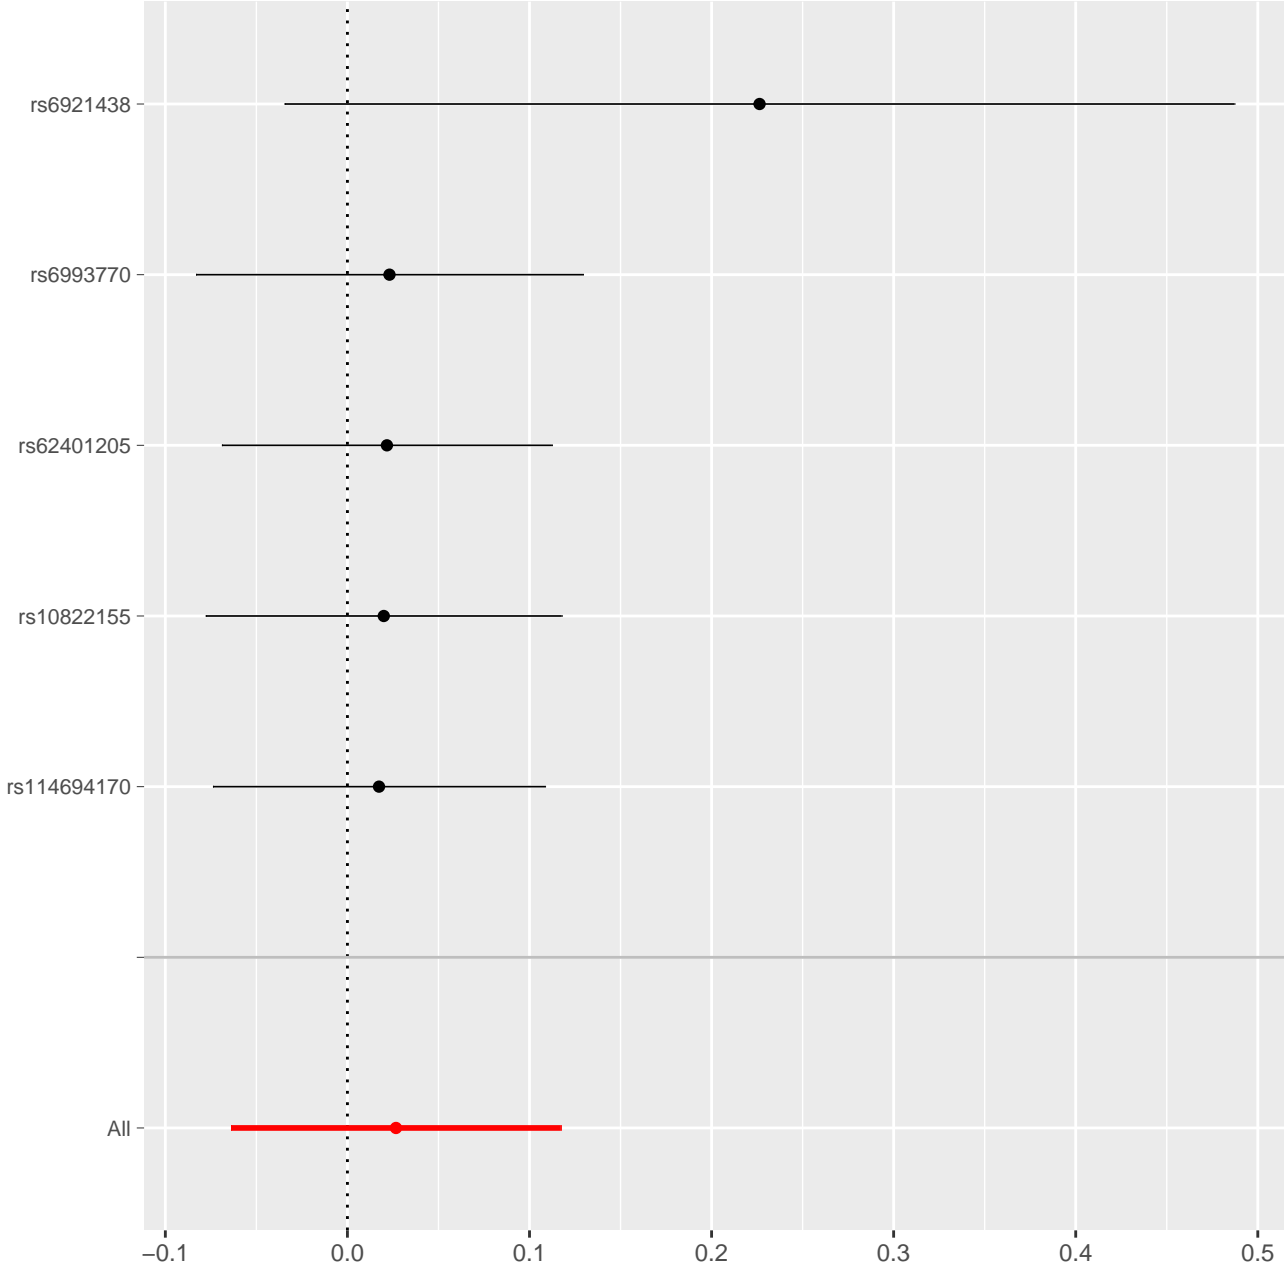

MR leave-one-out sensitivity analysis for 'Vascular endothelial growth factor A levels || id:ebi-IPs91-GCST90274848' on 'Ulcerative colitis || id:ieu-a-32'

# MR Test

Inverse variance weighted

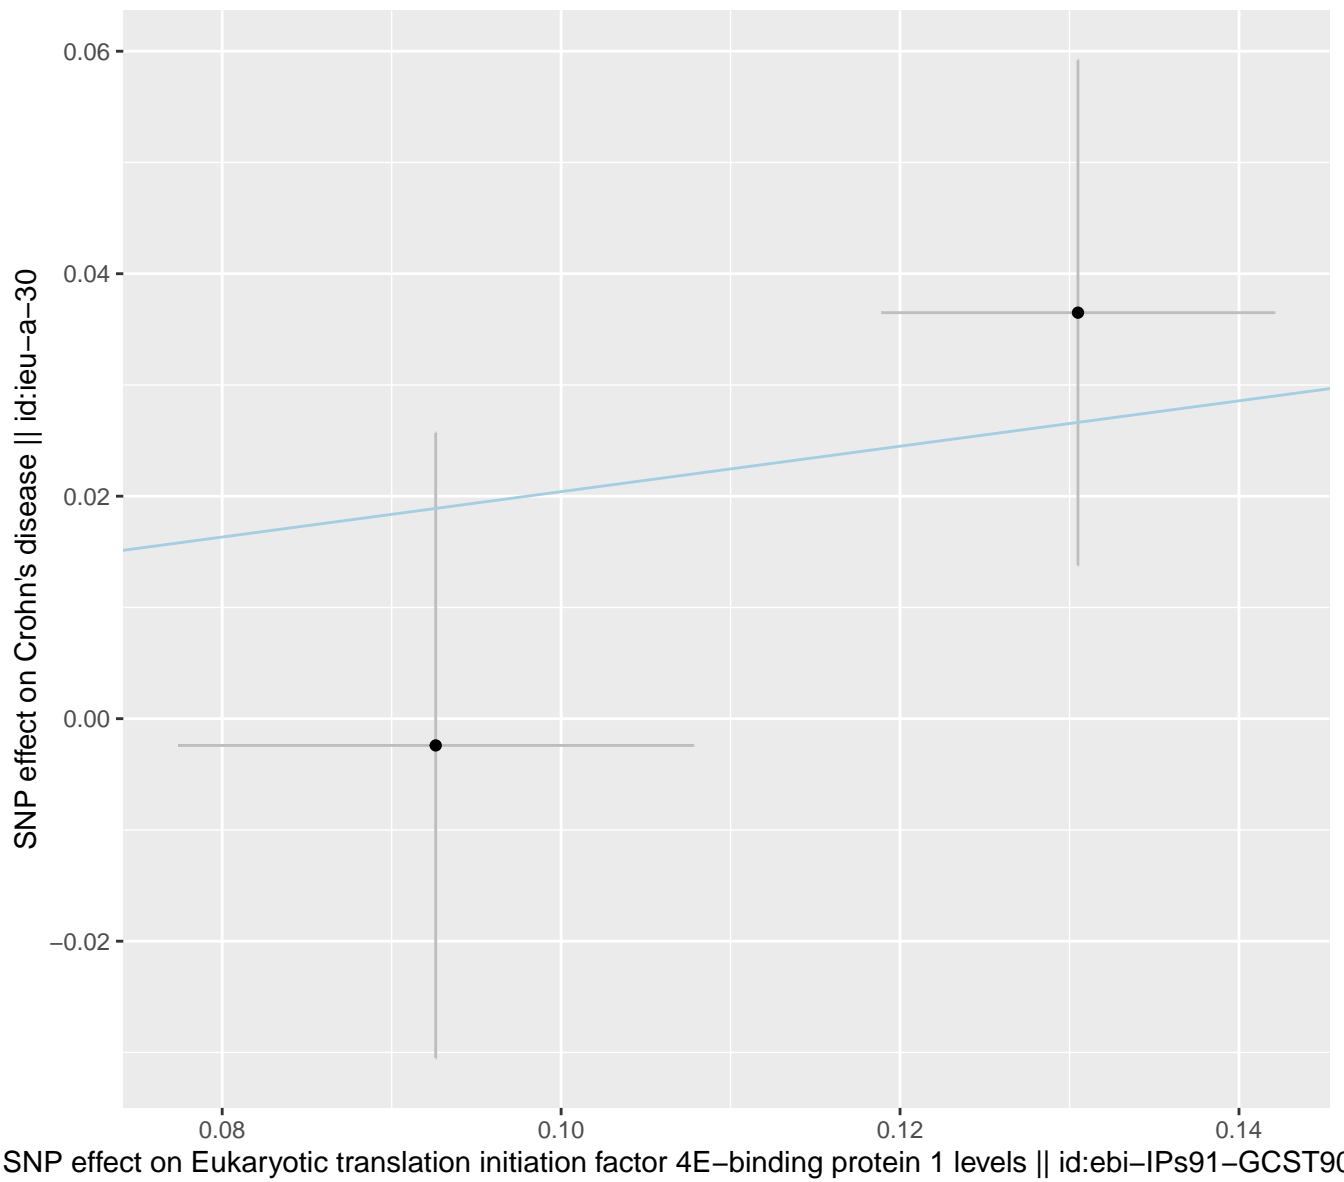

MR Test

Inverse variance weighted

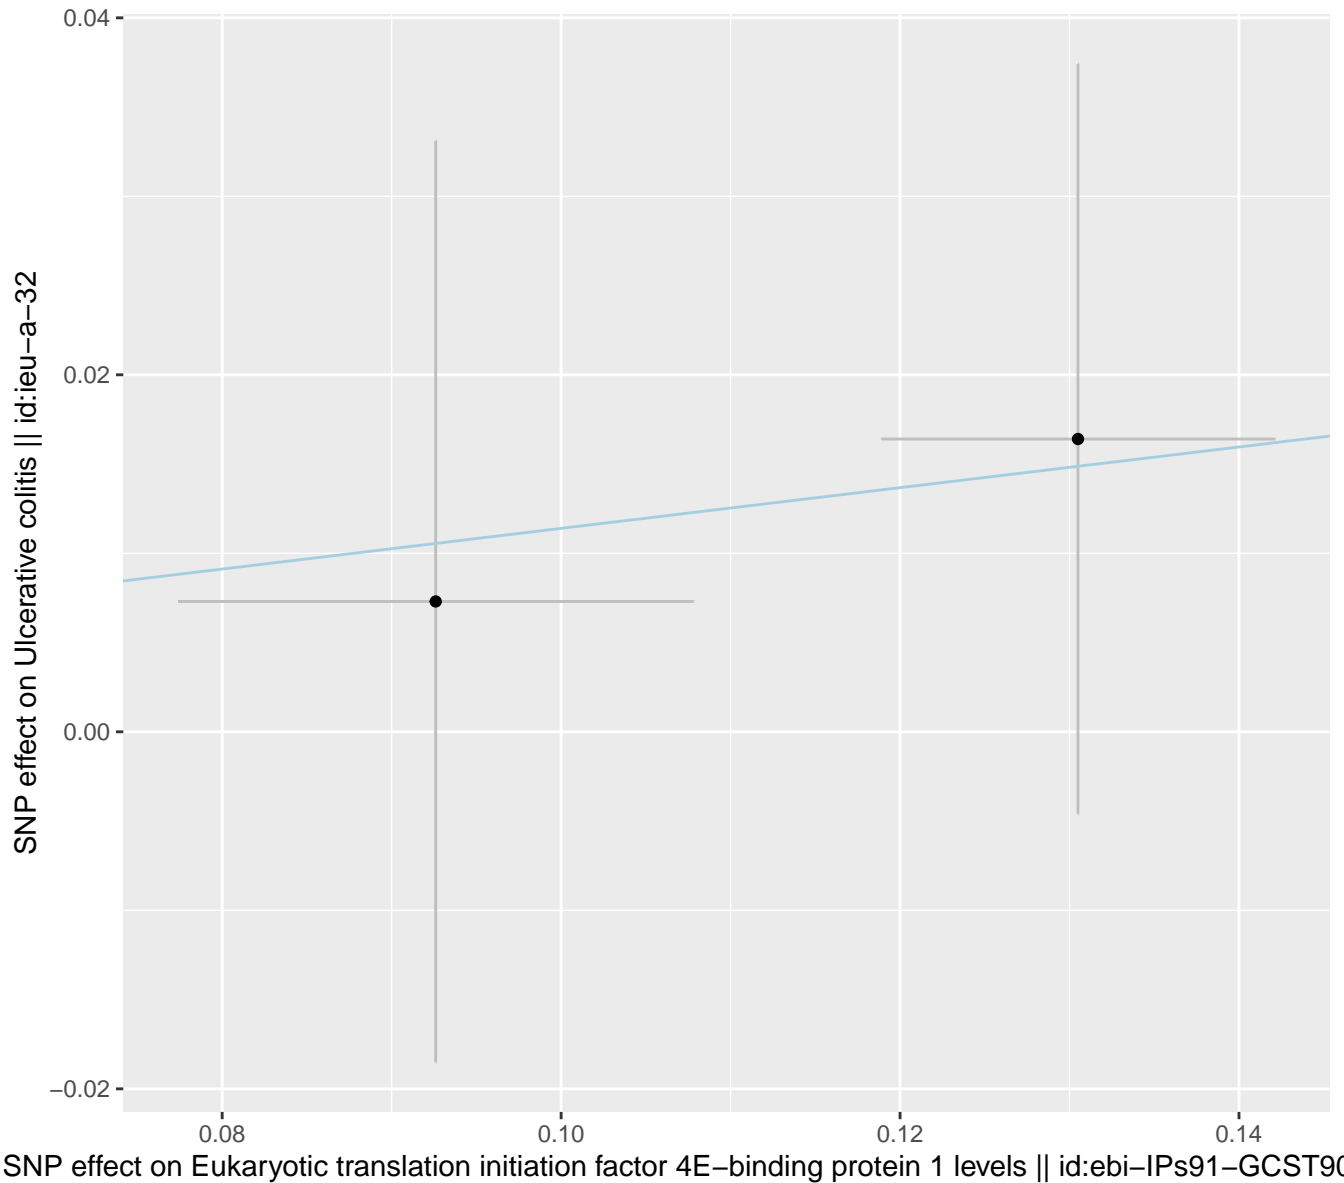

MR Test

Inverse variance weighted

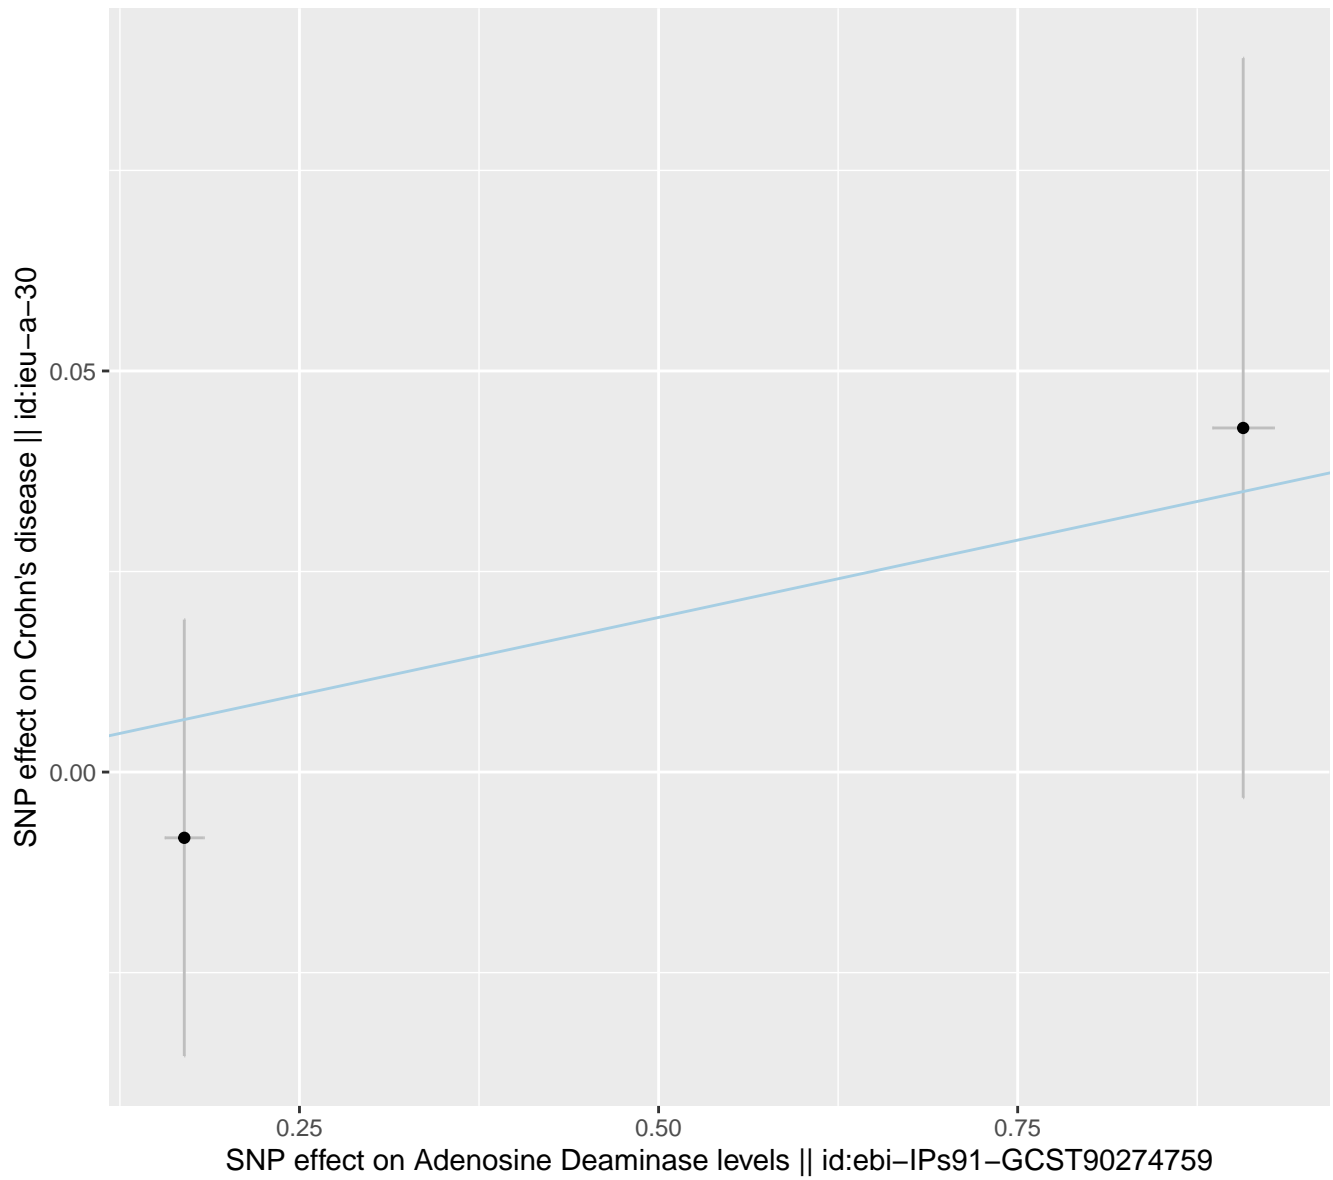

MR Test

Inverse variance weighted

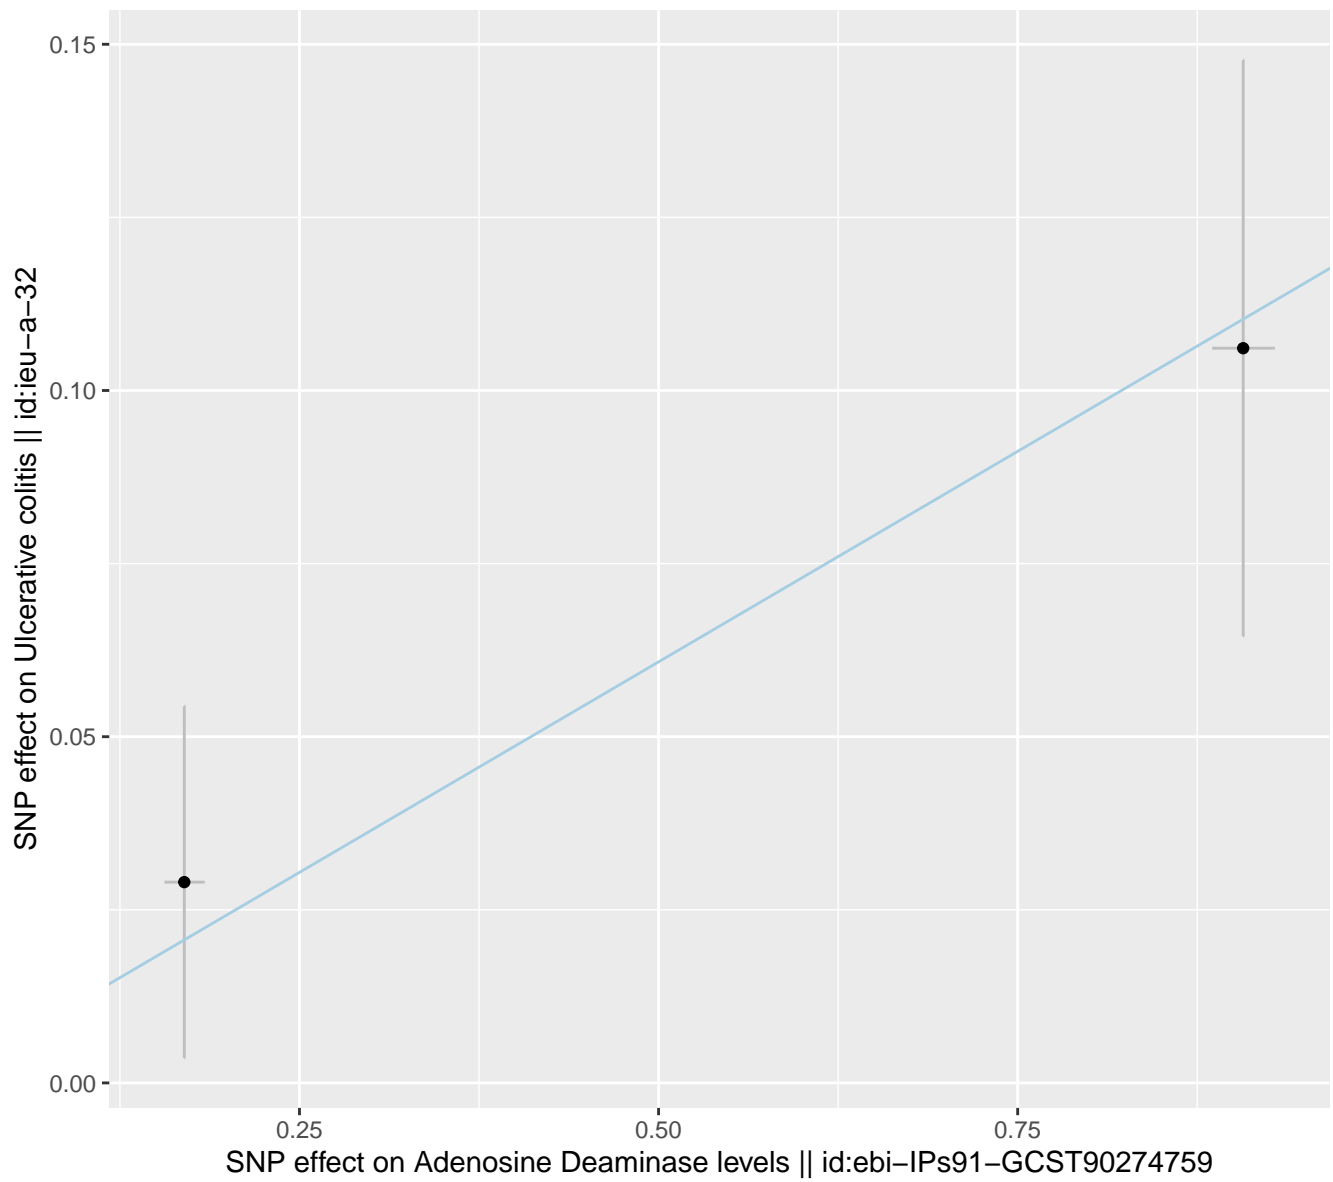



# MR Test

Inverse variance weighted

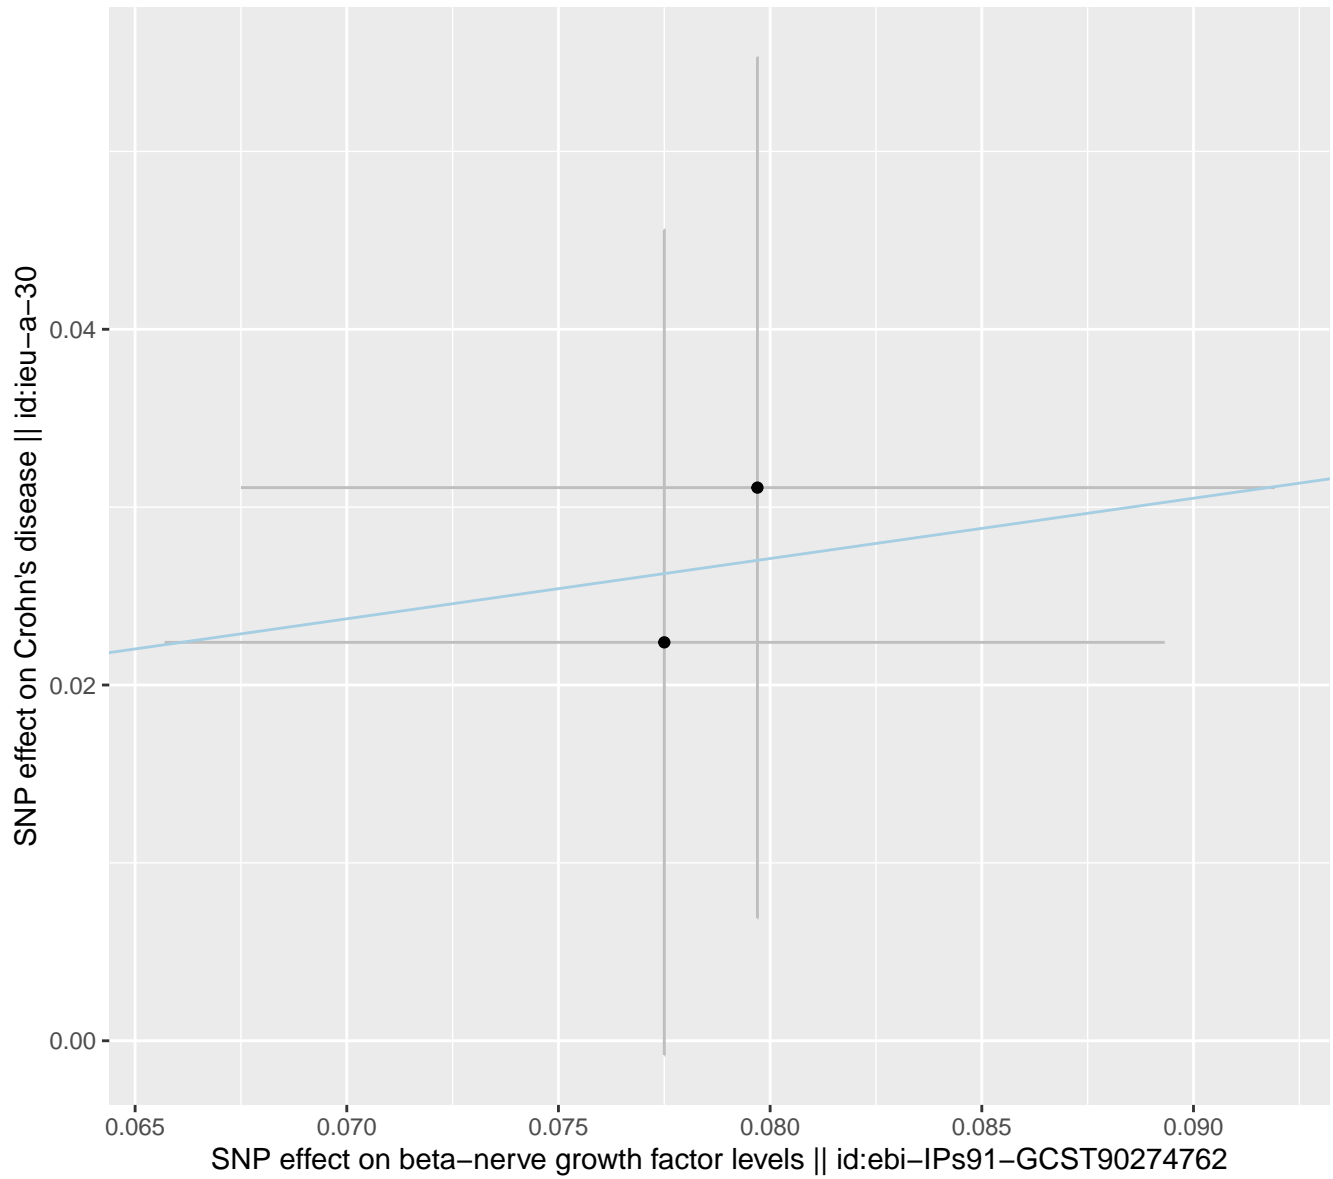

# MR Test

Inverse variance weighted

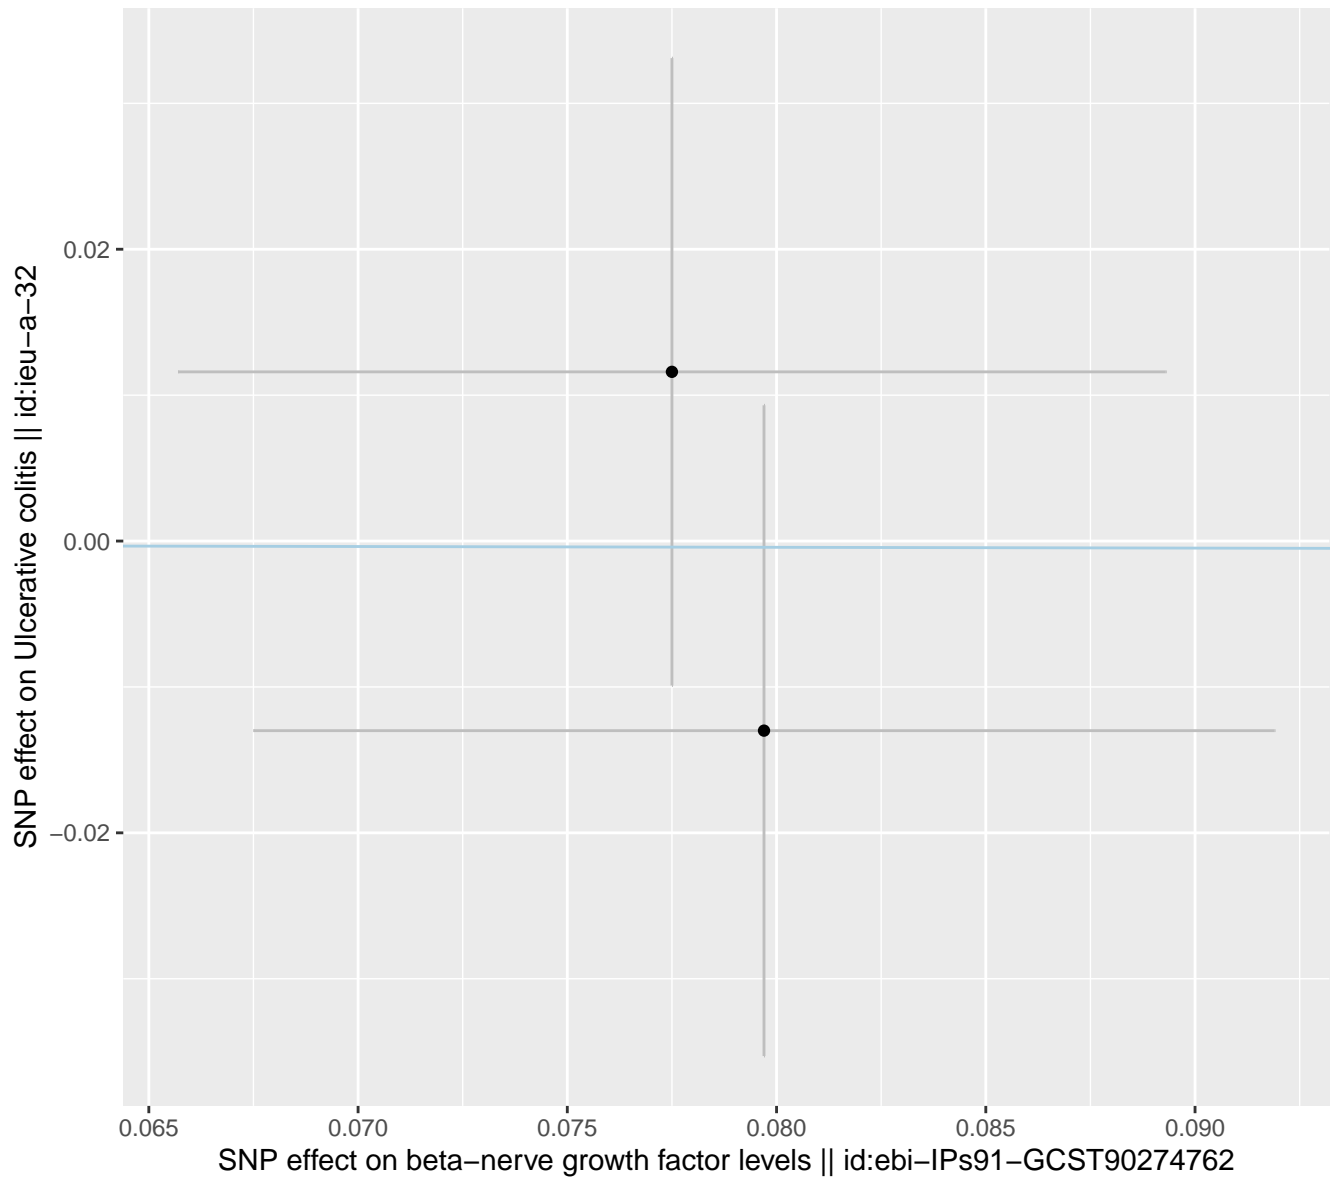

MR Test

- Inverse variance weighted
- MR Egger
- Weighted median
- Weighted mode

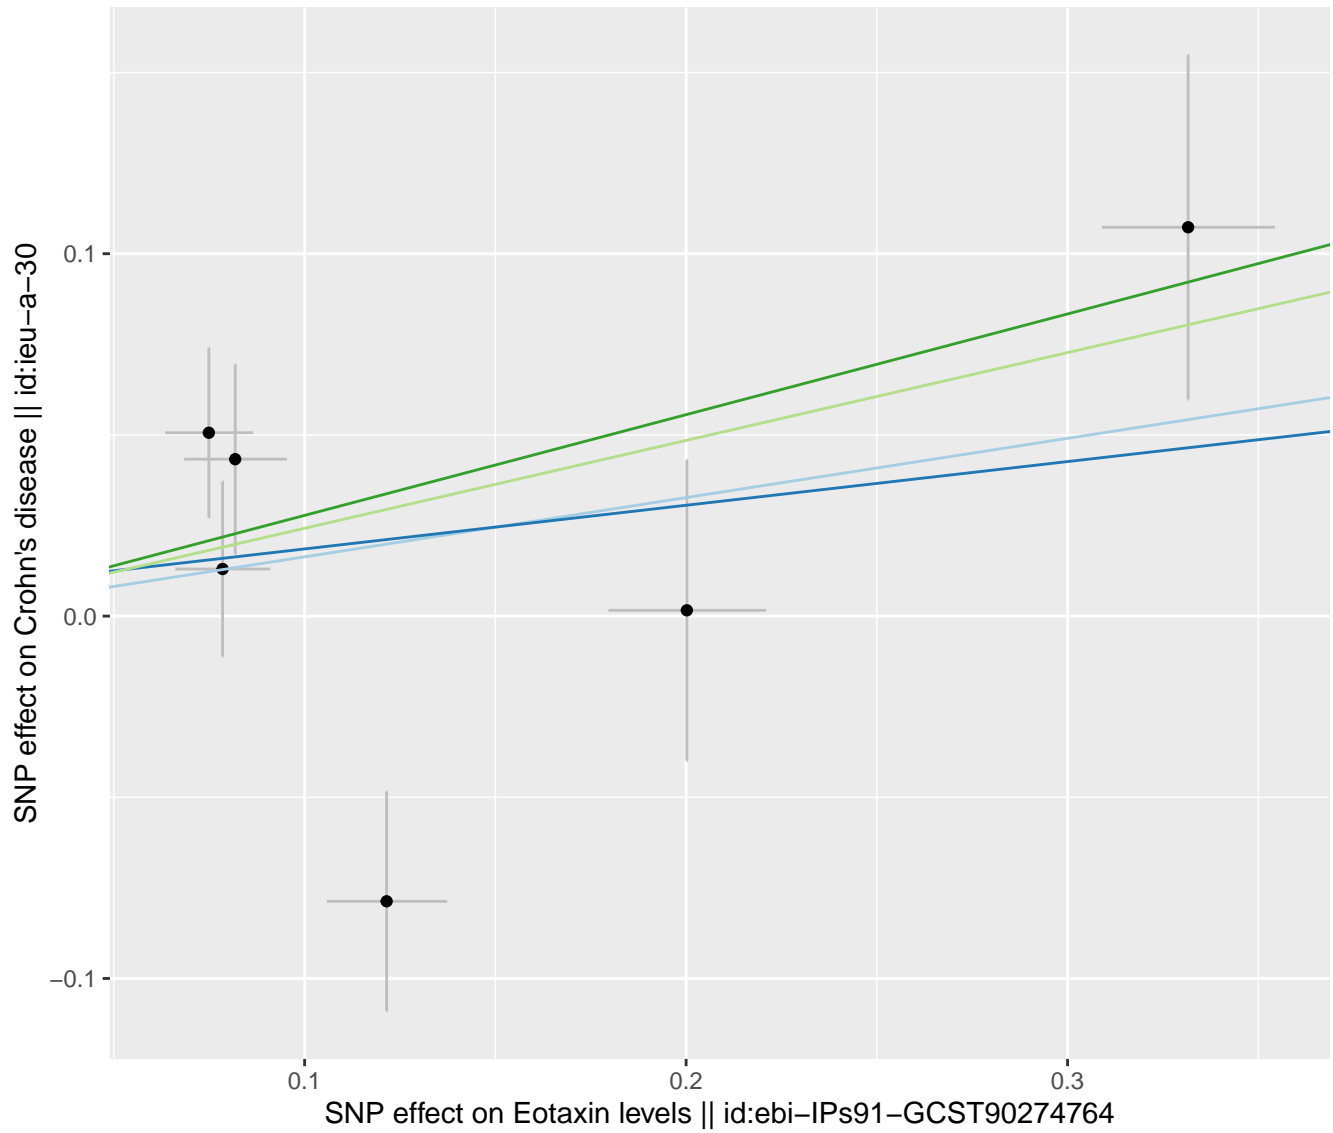

MR Test

- Inverse variance weighted
- MR Egger
- Weighted median
- Weighted mode

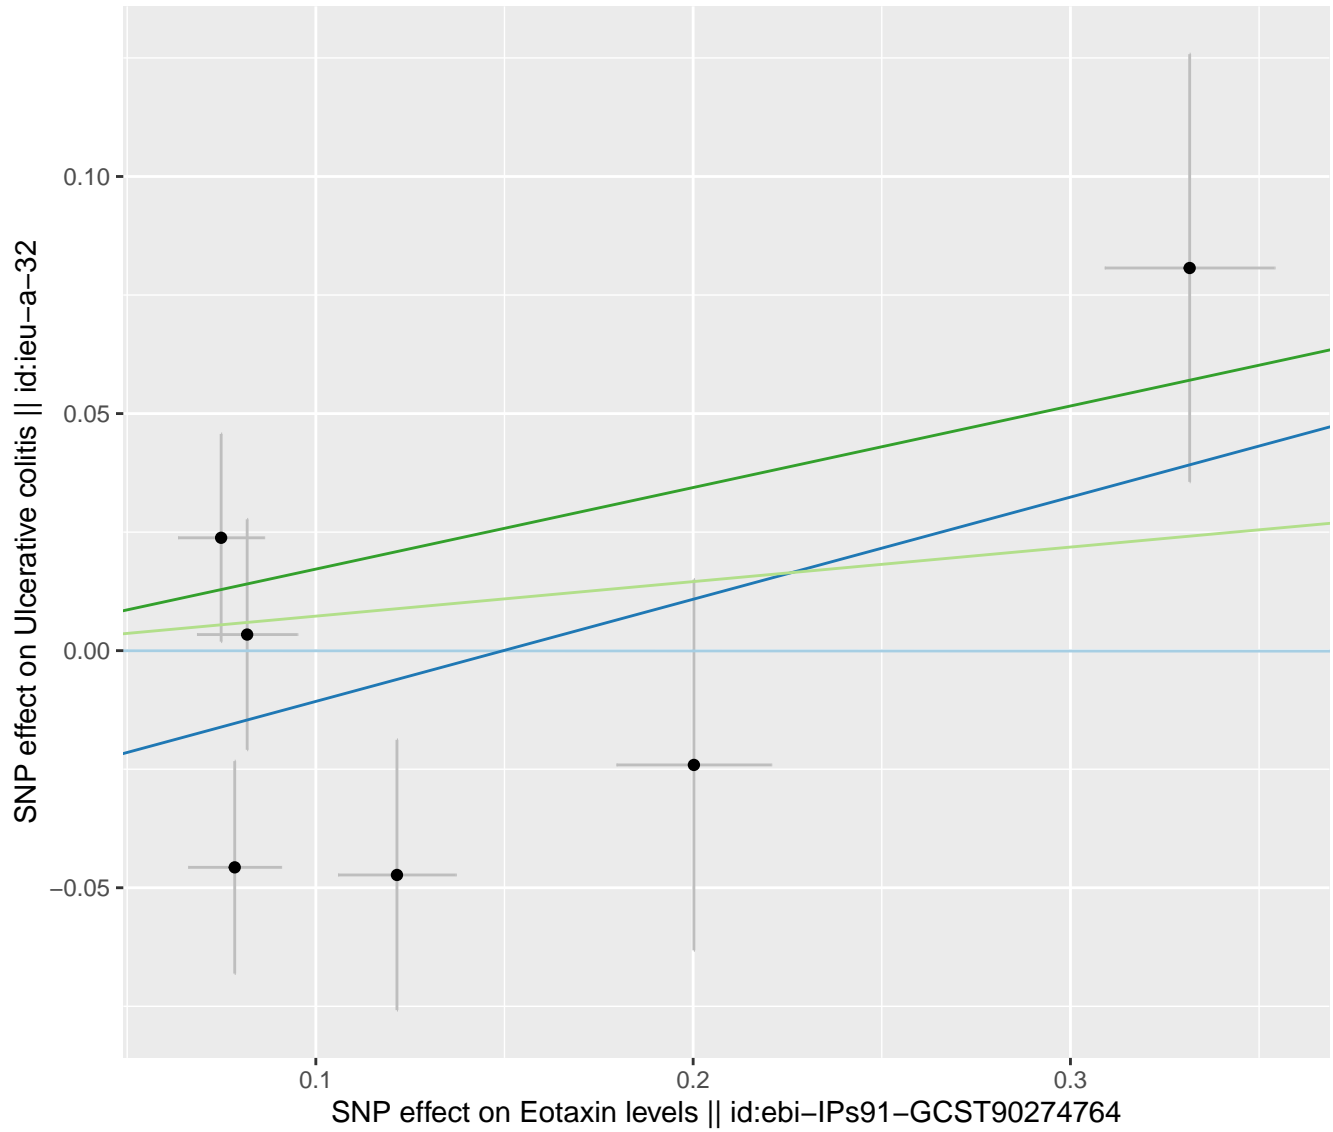

# MR Test

Inverse variance weighted

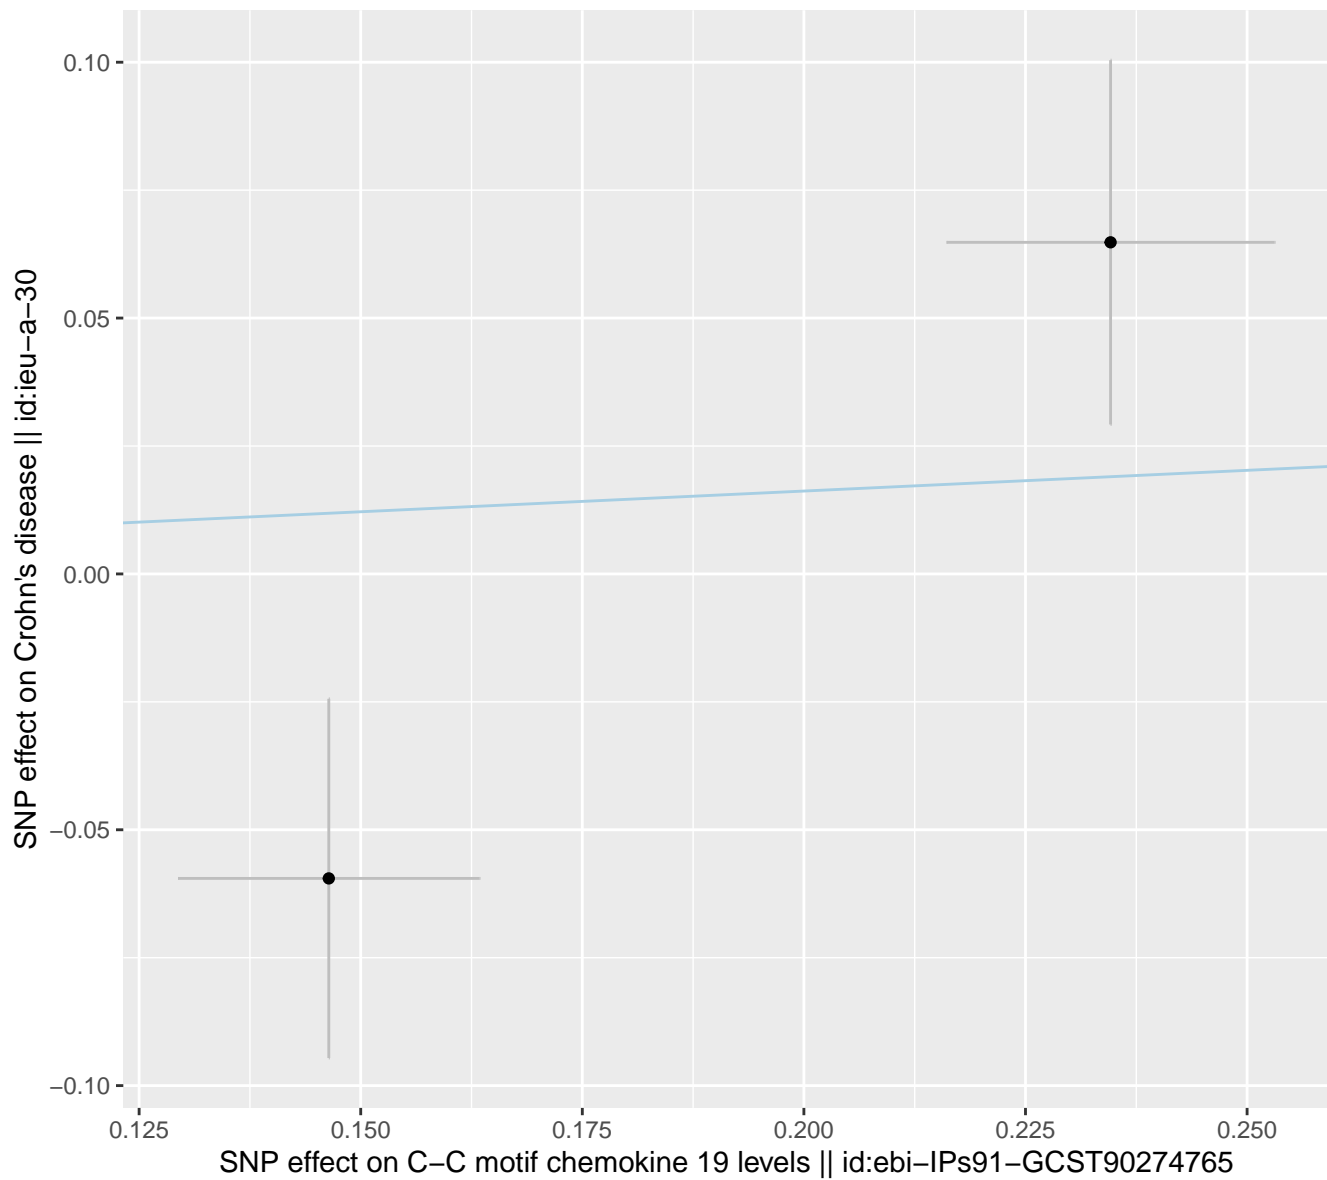

# MR Test

Inverse variance weighted

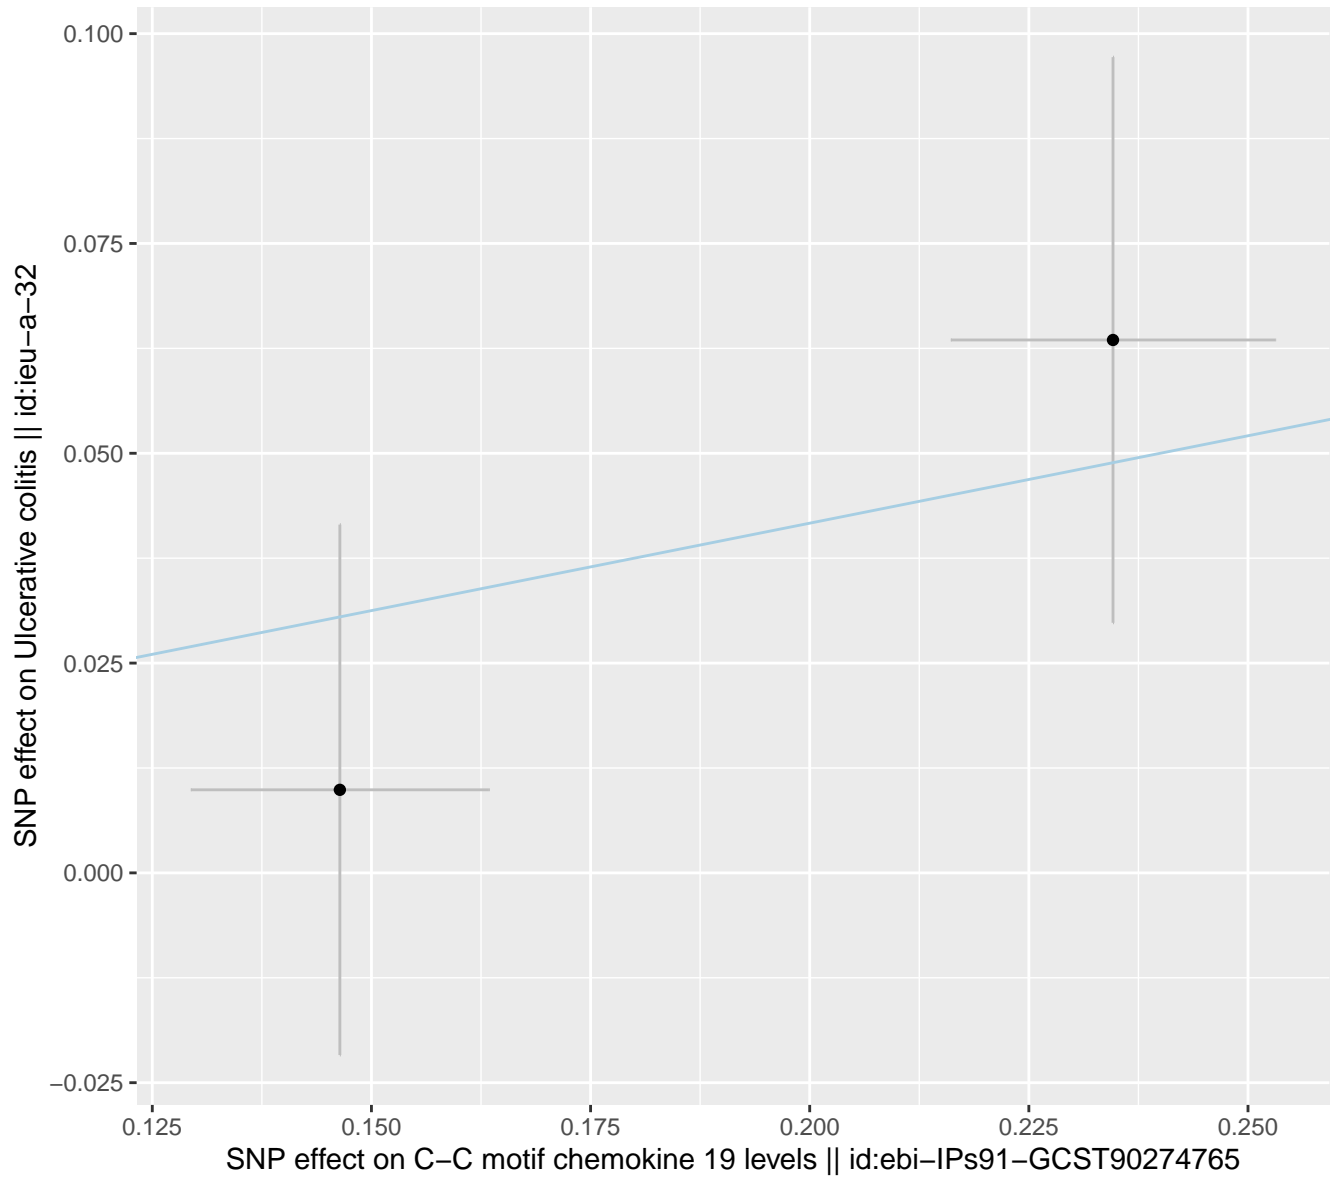

### MR Test

Inverse variance weighted

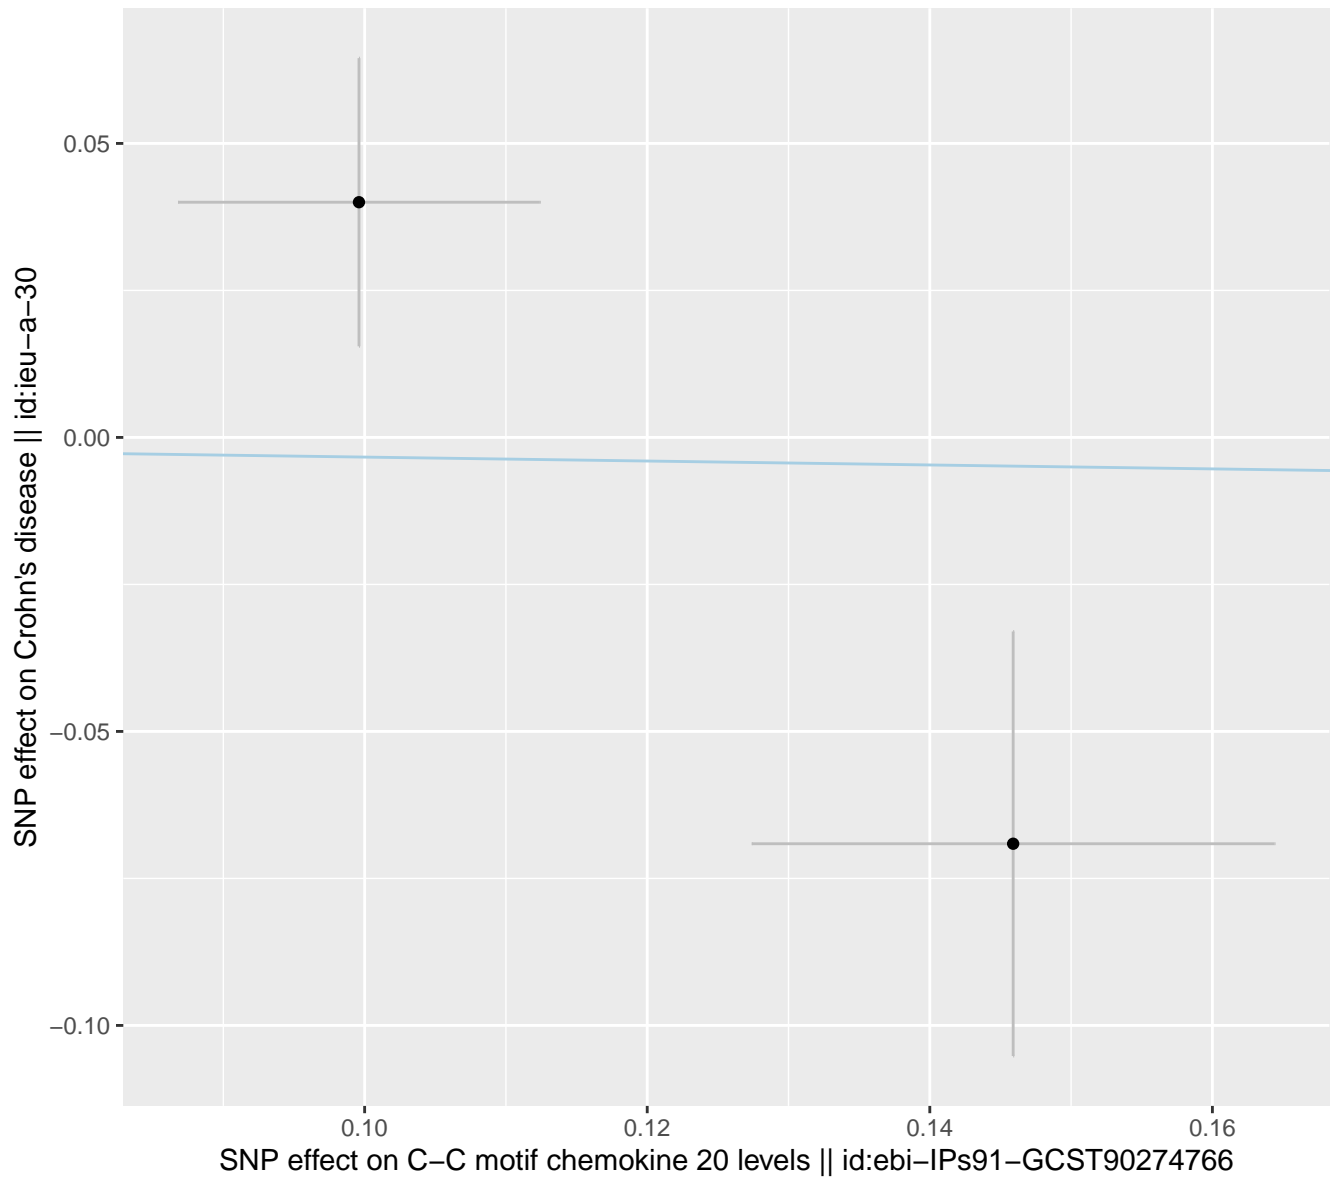

# MR Test

Inverse variance weighted

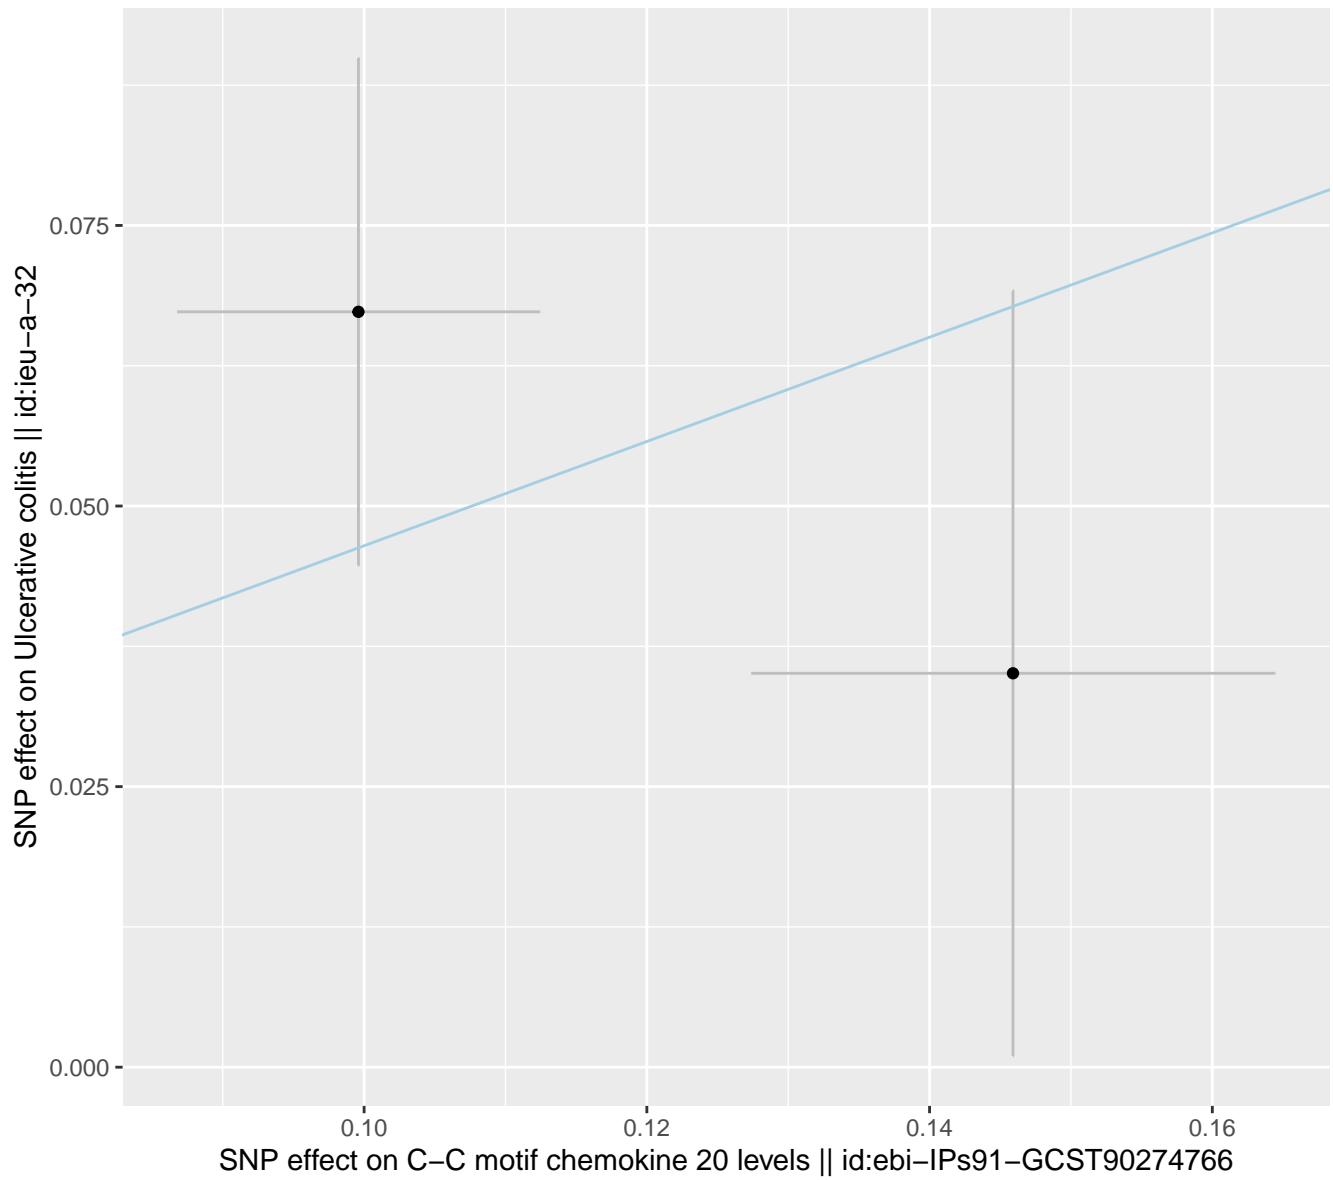



MR Test

- Inverse variance weighted
- MR Egger
- Weighted median
- Weighted mode

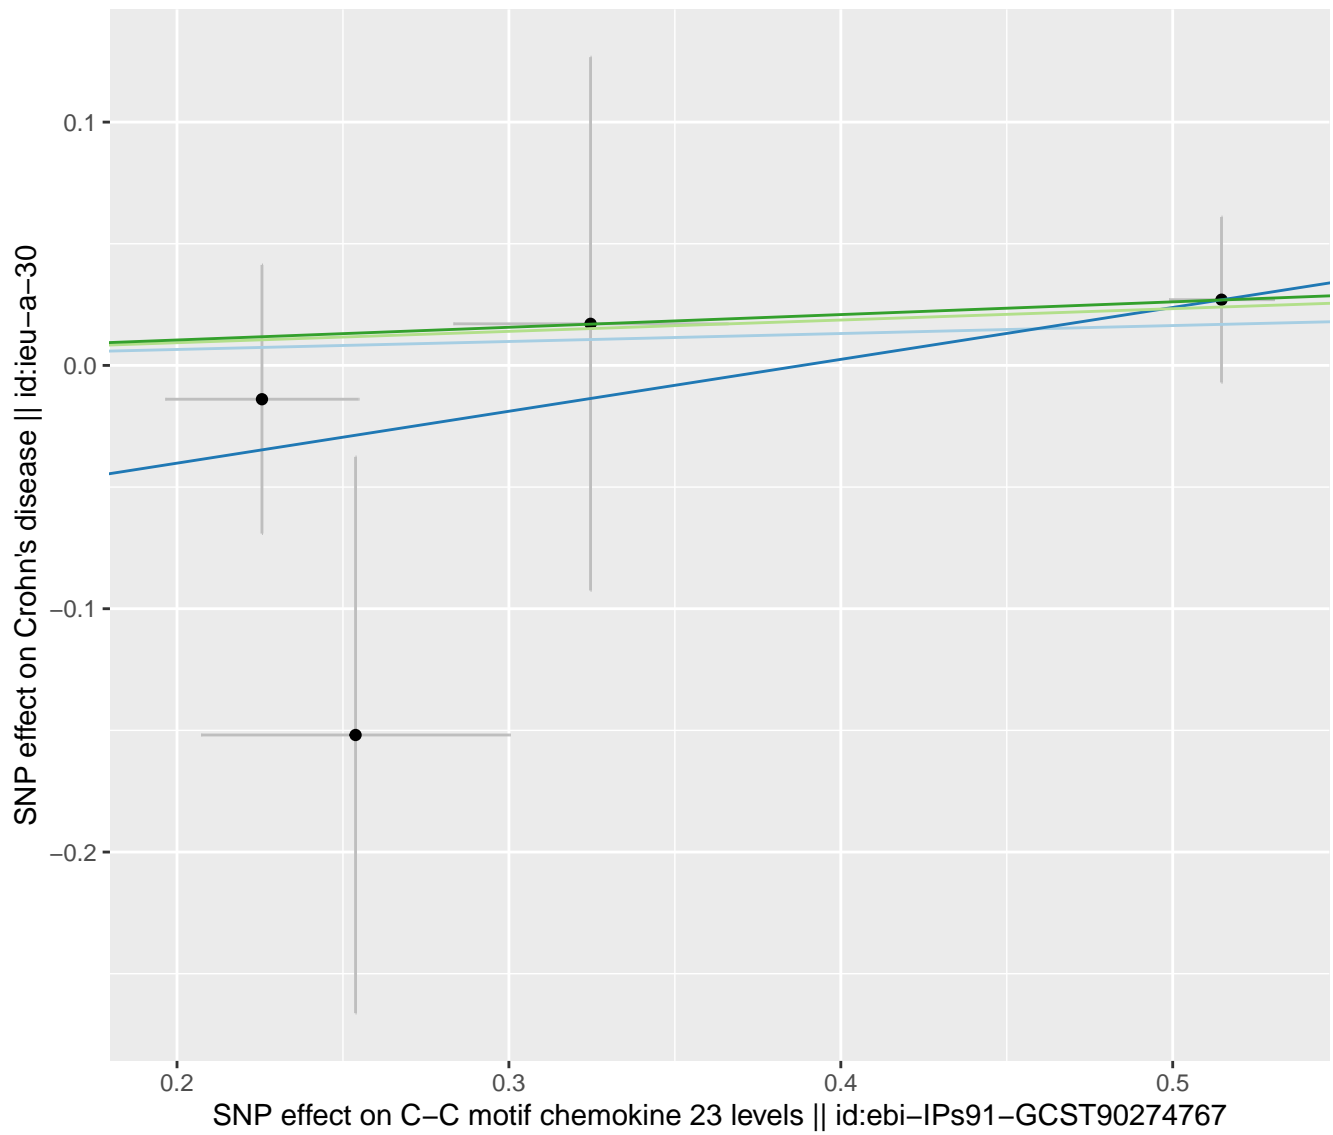

### MR Test

- Inverse variance weighted
- MR Egger
- Weighted median
- Weighted mode

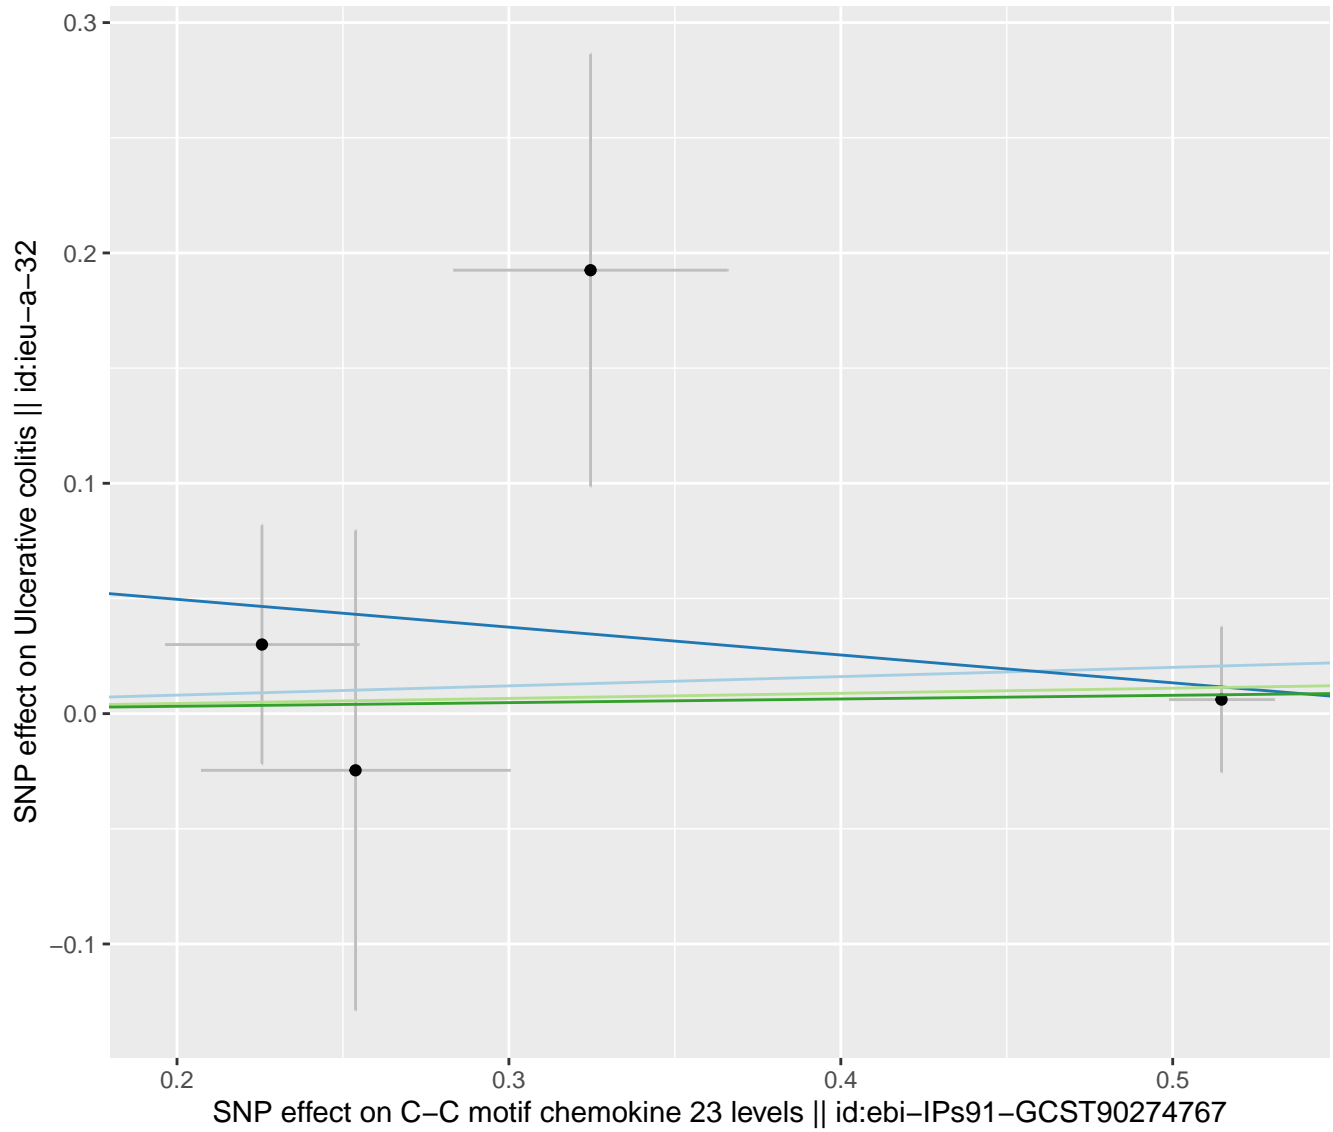

### MR Test

- Inverse variance weighted
- MR Egger
- Weighted median
- Weighted mode

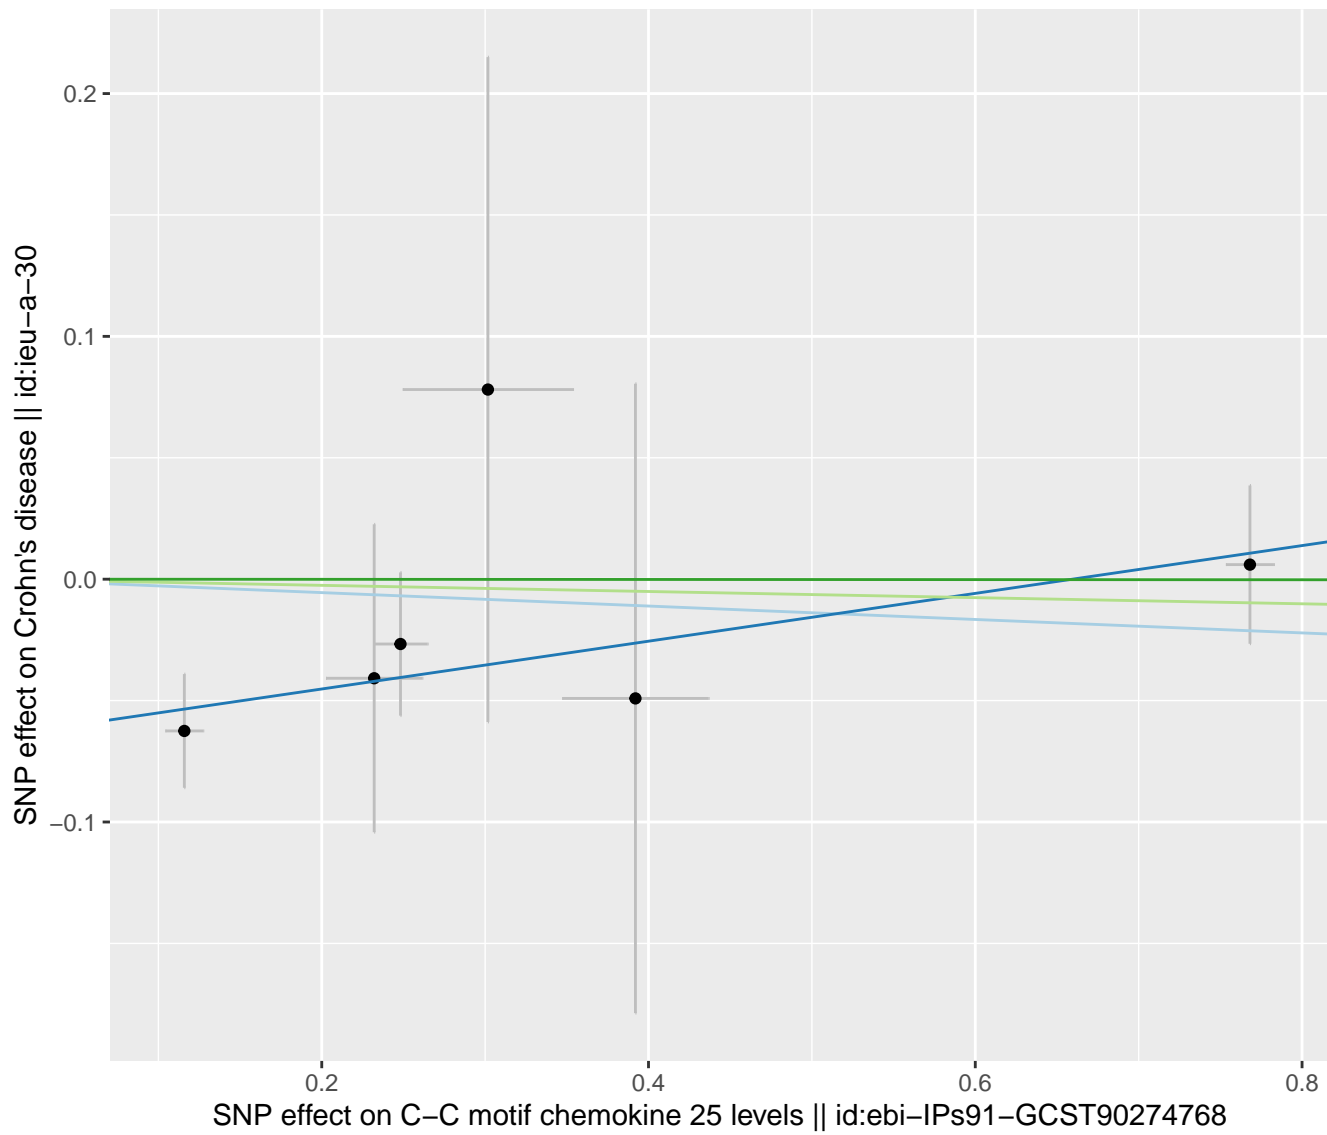

### MR Test

- Inverse variance weighted
- MR Egger
- Weighted median
- Weighted mode

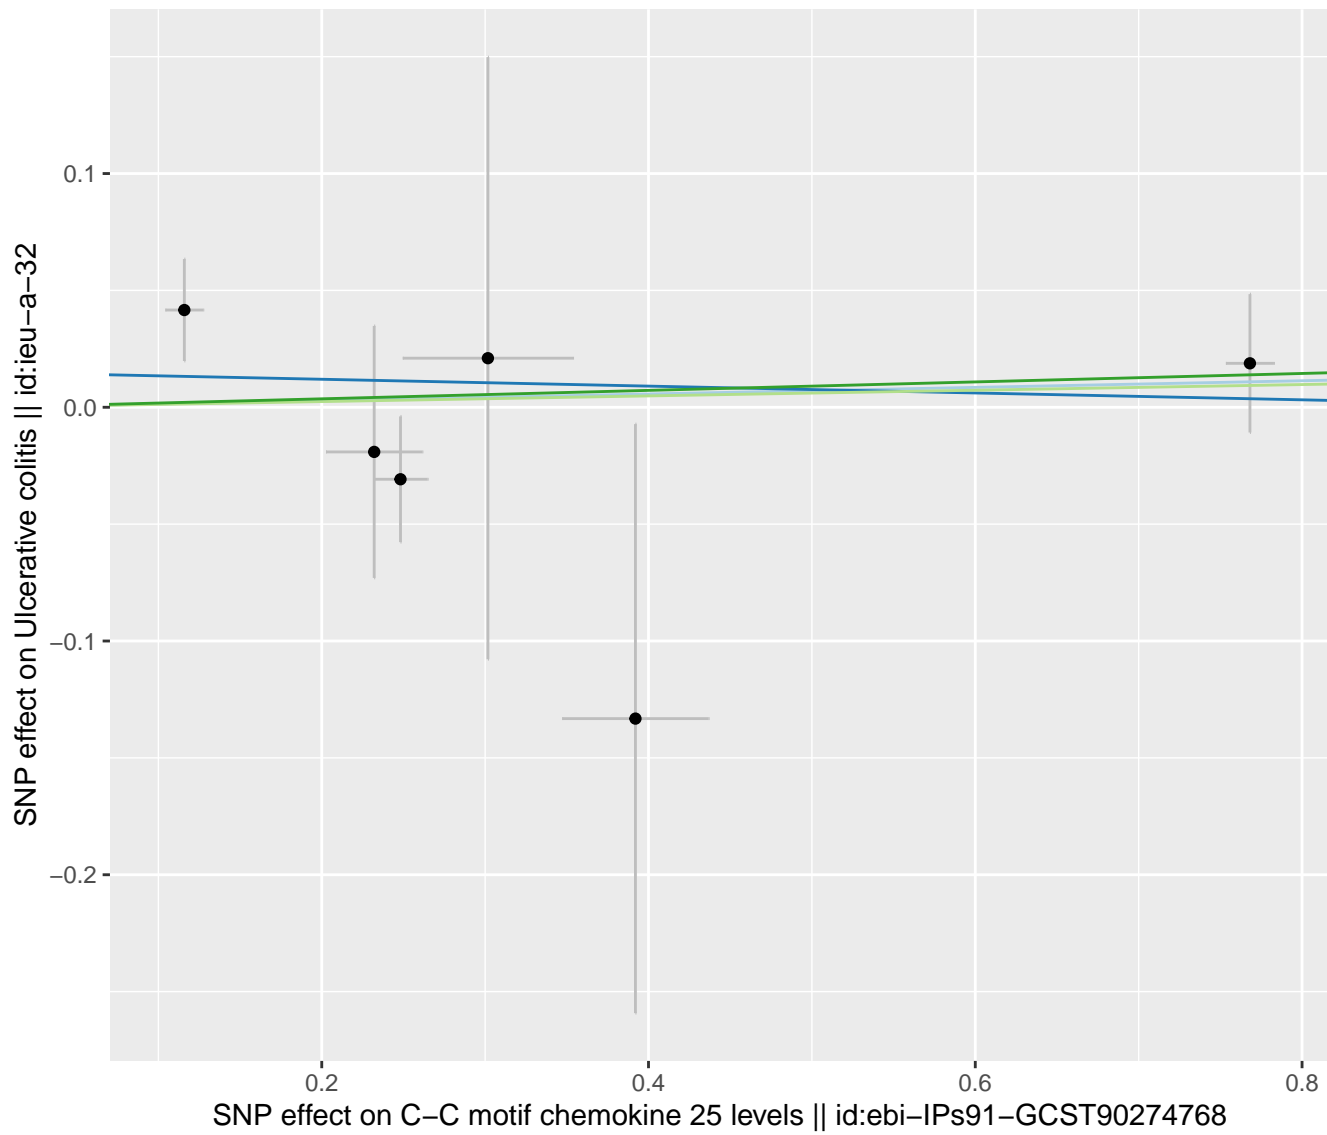

MR Test

- Inverse variance weighted
- MR Egger
- Weighted median
- Weighted mode

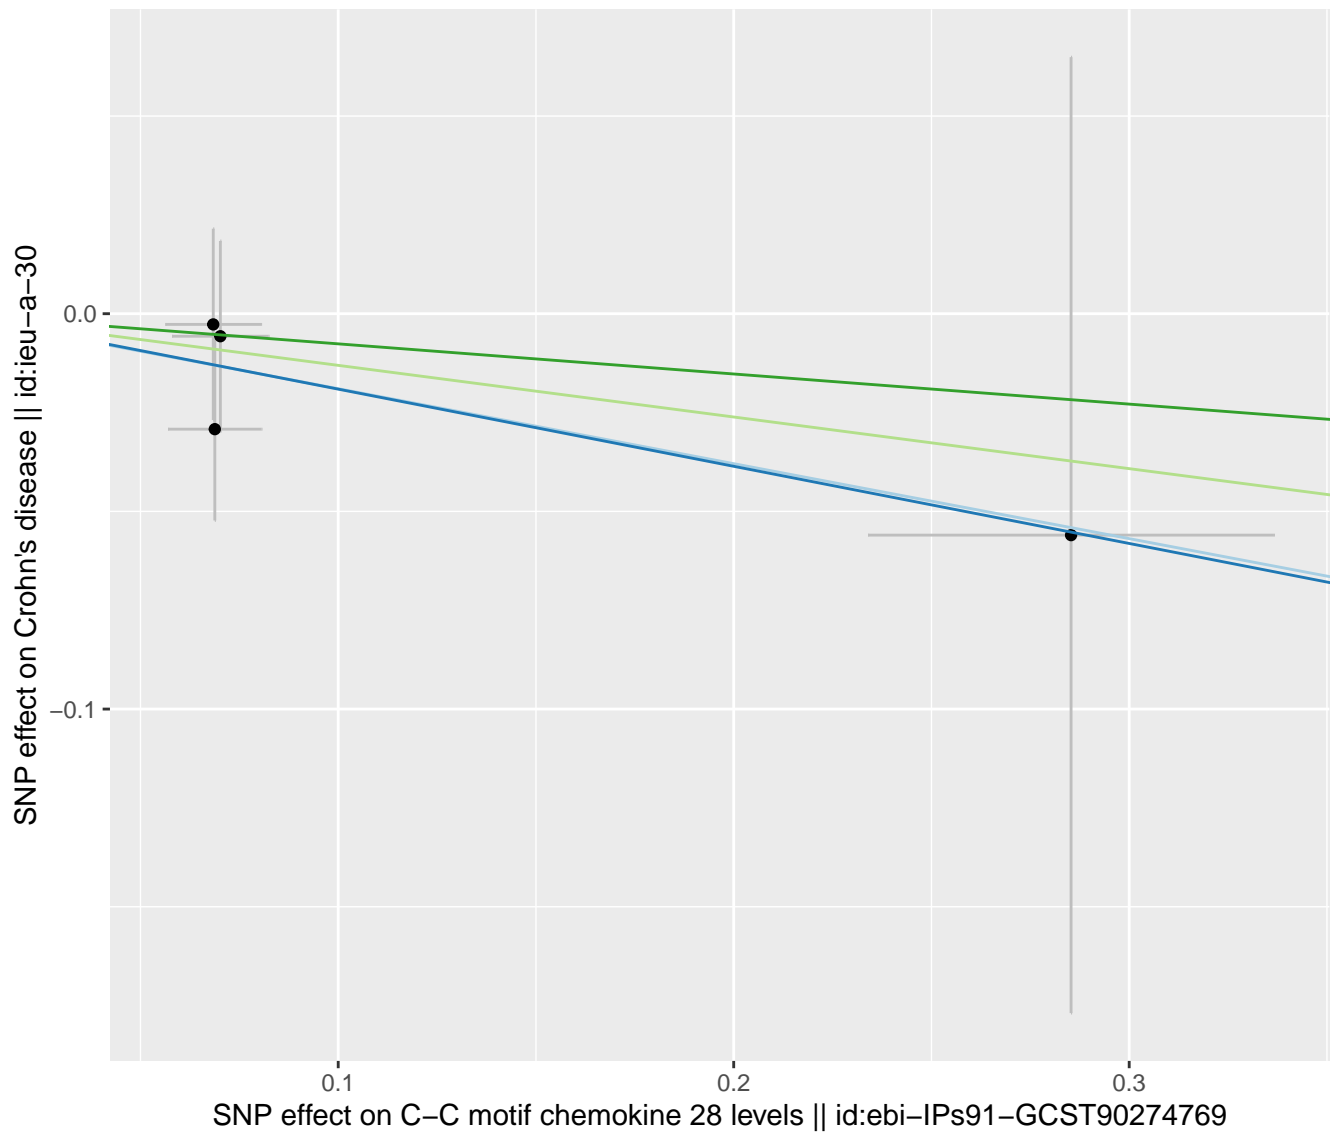

MR Test

- Inverse variance weighted
- MR Egger
- Weighted median
- Weighted mode

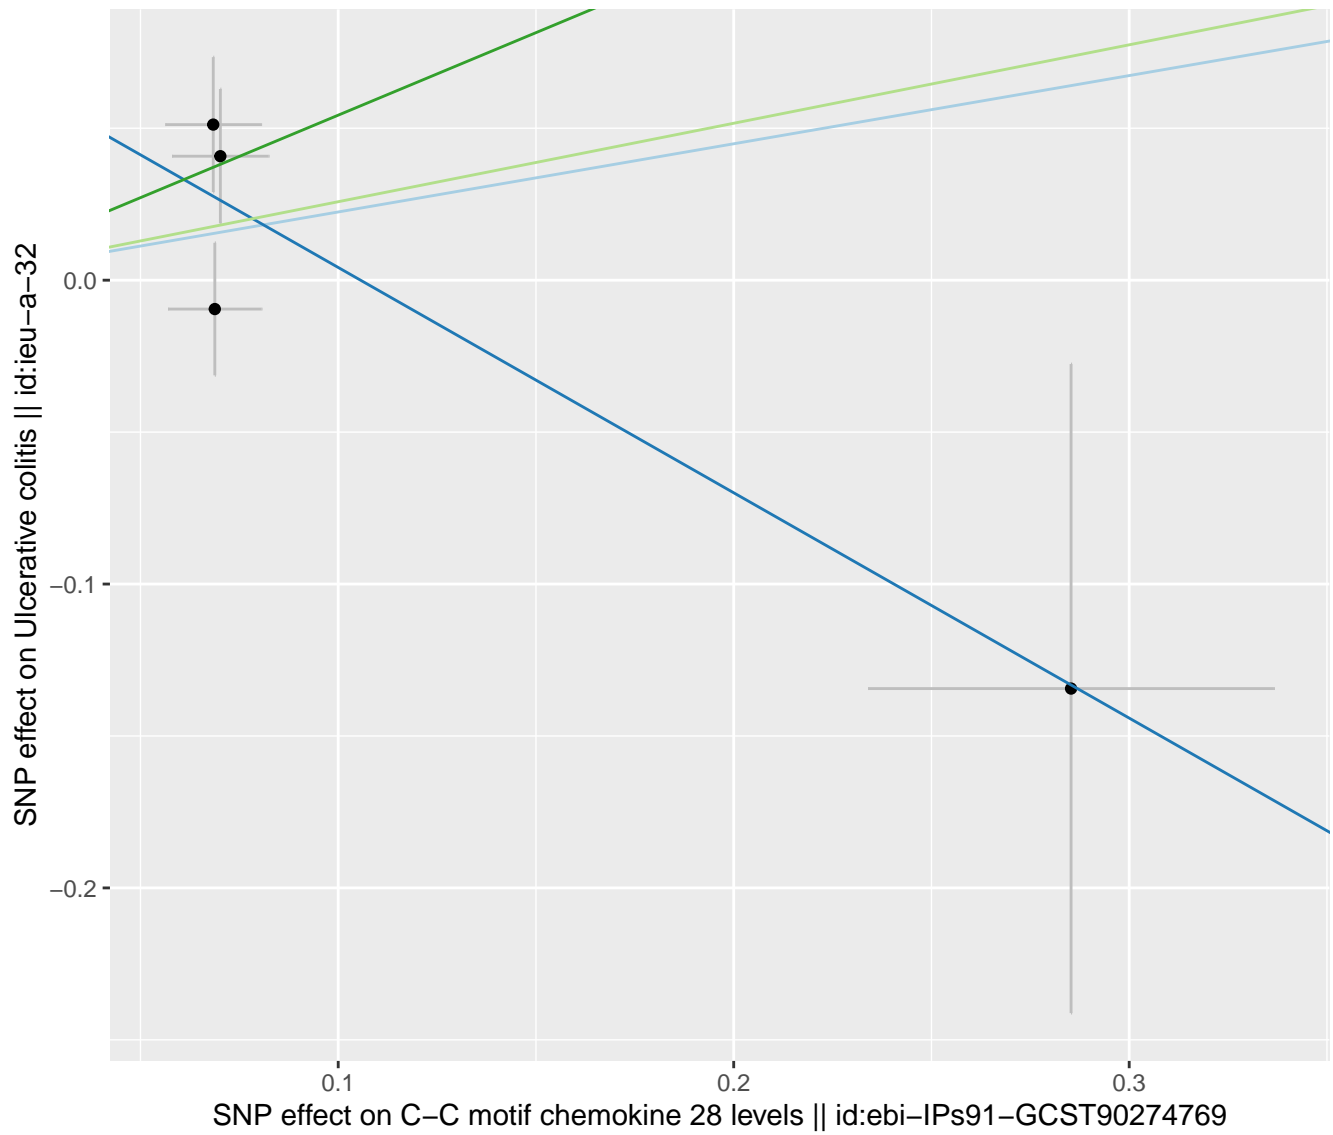

### MR Test

- Inverse variance weighted
- MR Egger
- Weighted median
- Weighted mode

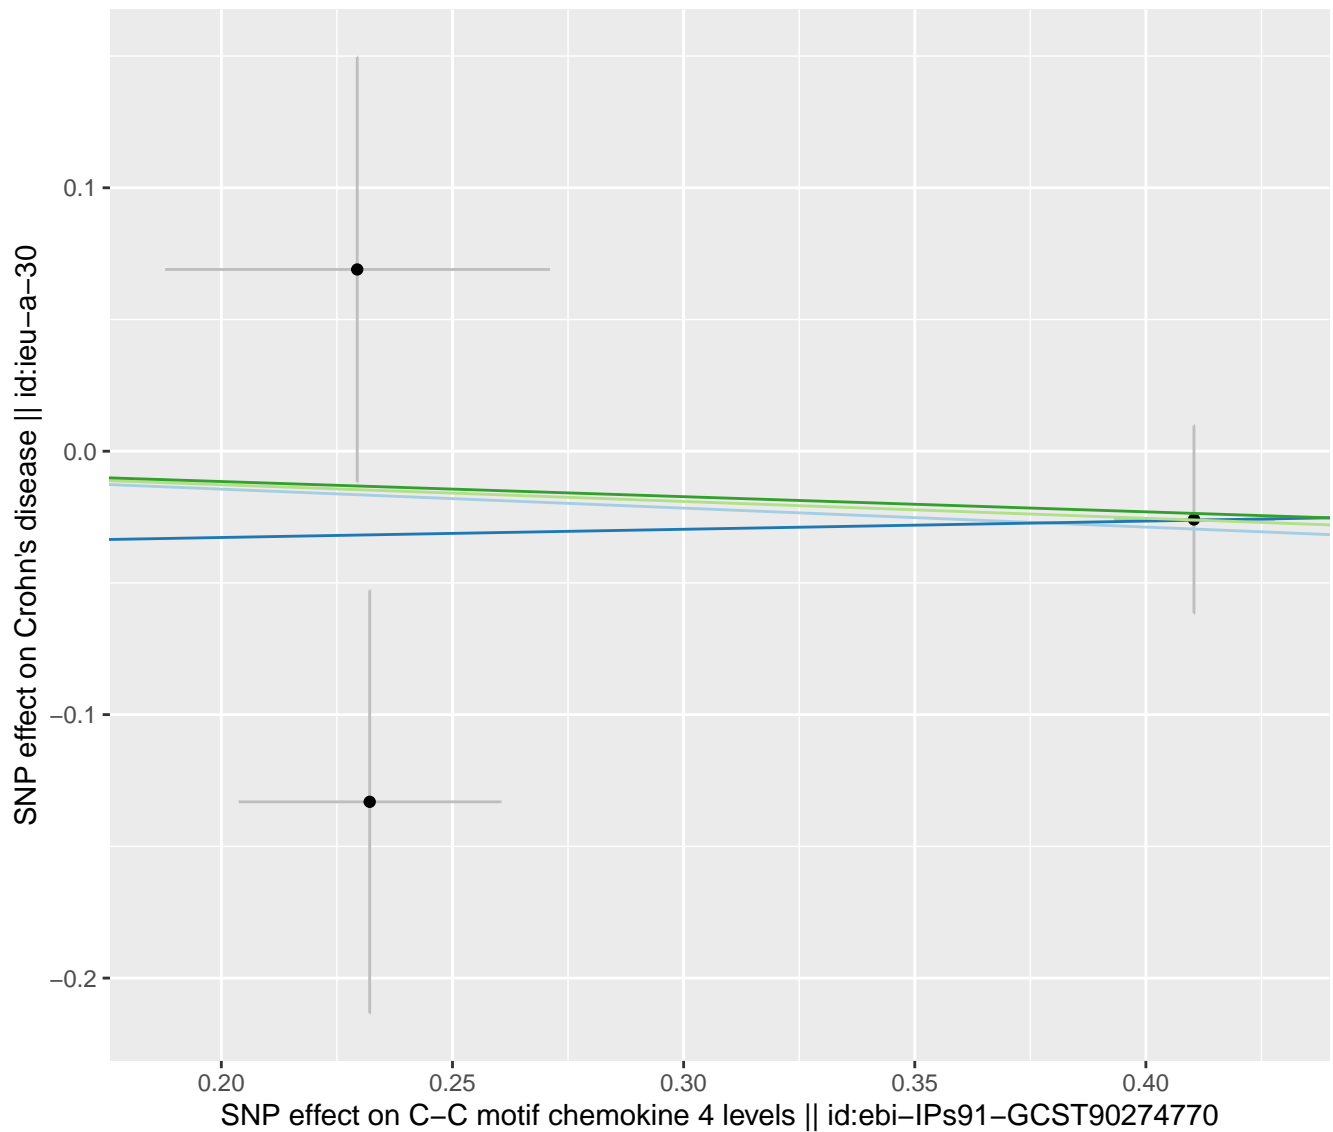

### MR Test

- Inverse variance weighted
- MR Egger
- Weighted median
- Weighted mode

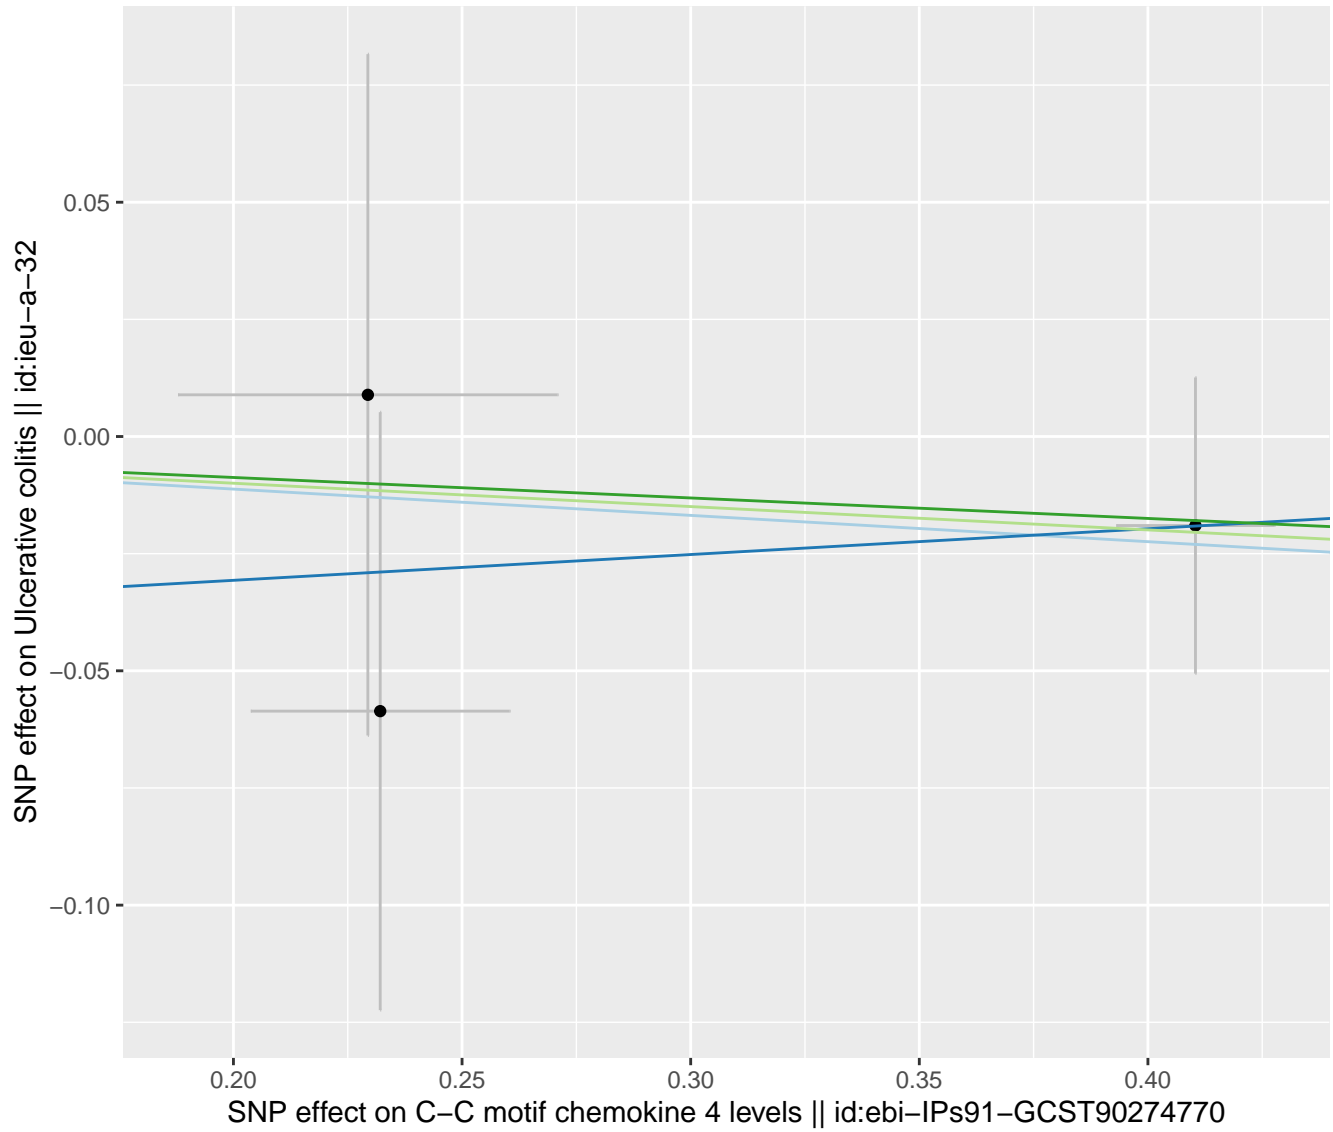



MR Test

- Inverse variance weighted
- MR Egger
- Weighted median
- Weighted mode

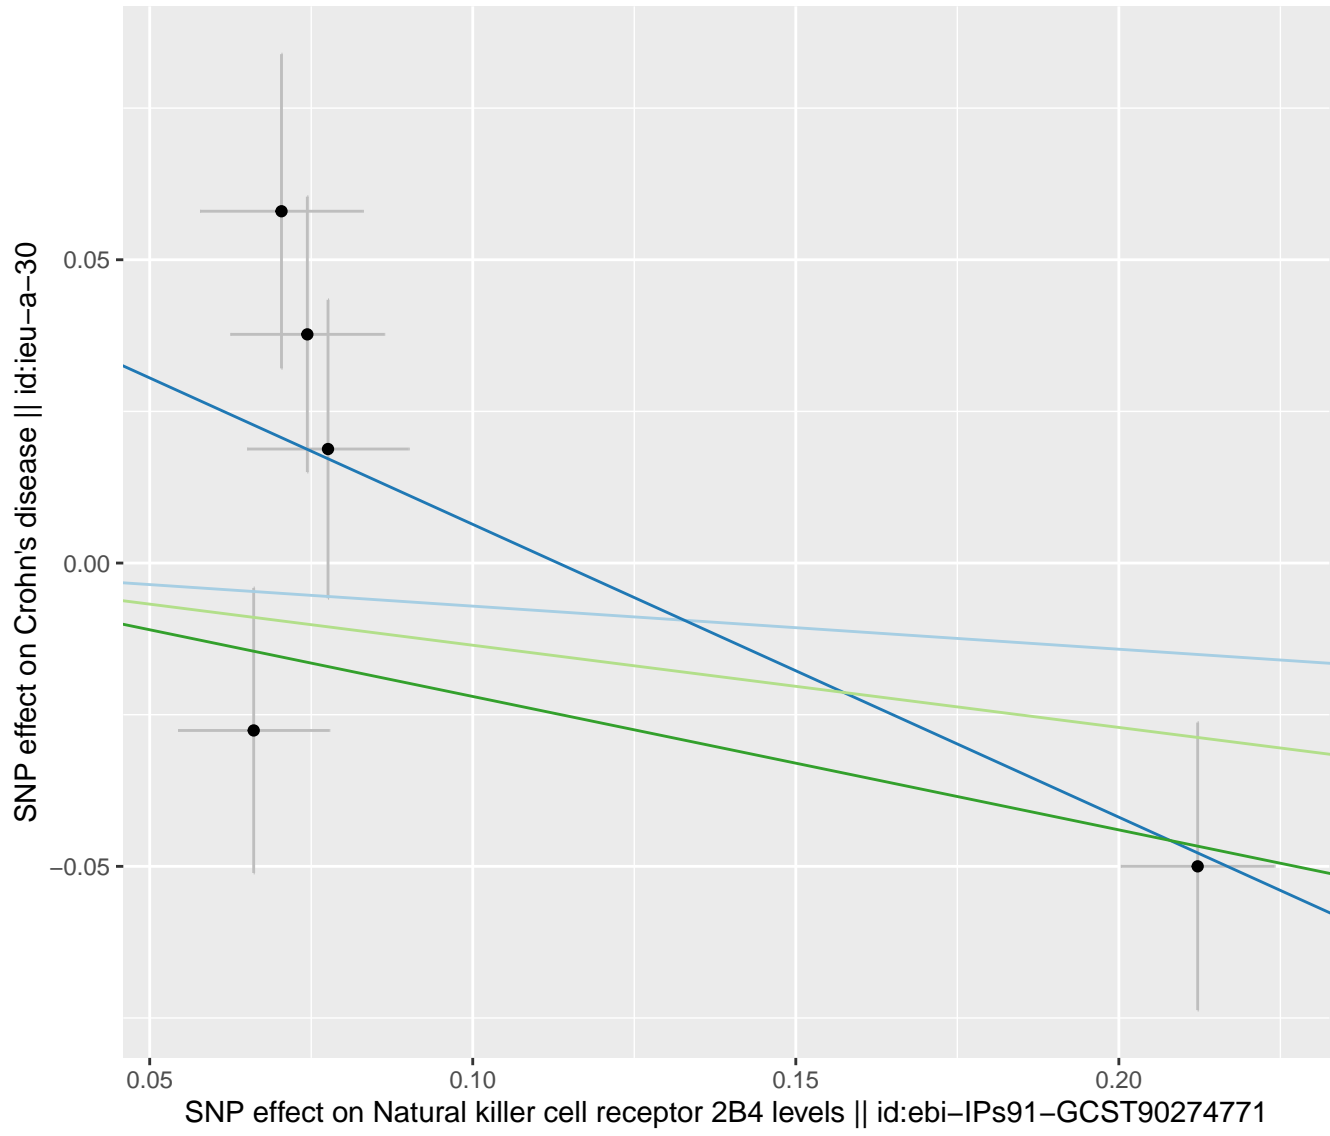

MR Test

- Inverse variance weighted
- MR Egger
- Weighted median
- Weighted mode

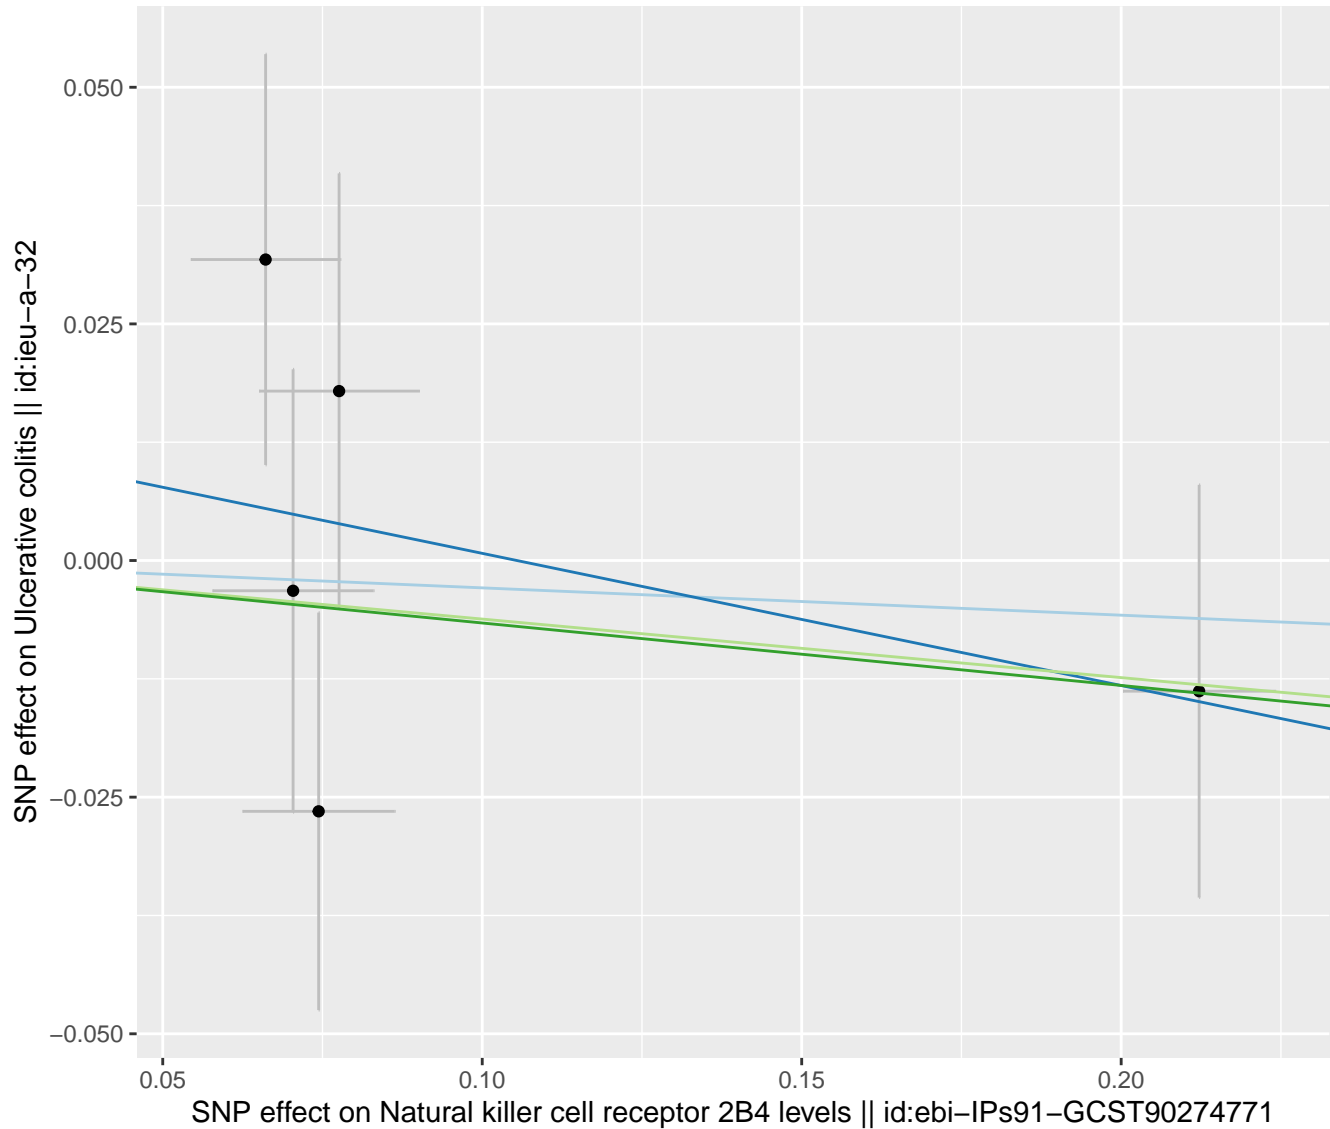

MR Test

- Inverse variance weighted
- MR Egger
- Weighted median
- Weighted mode

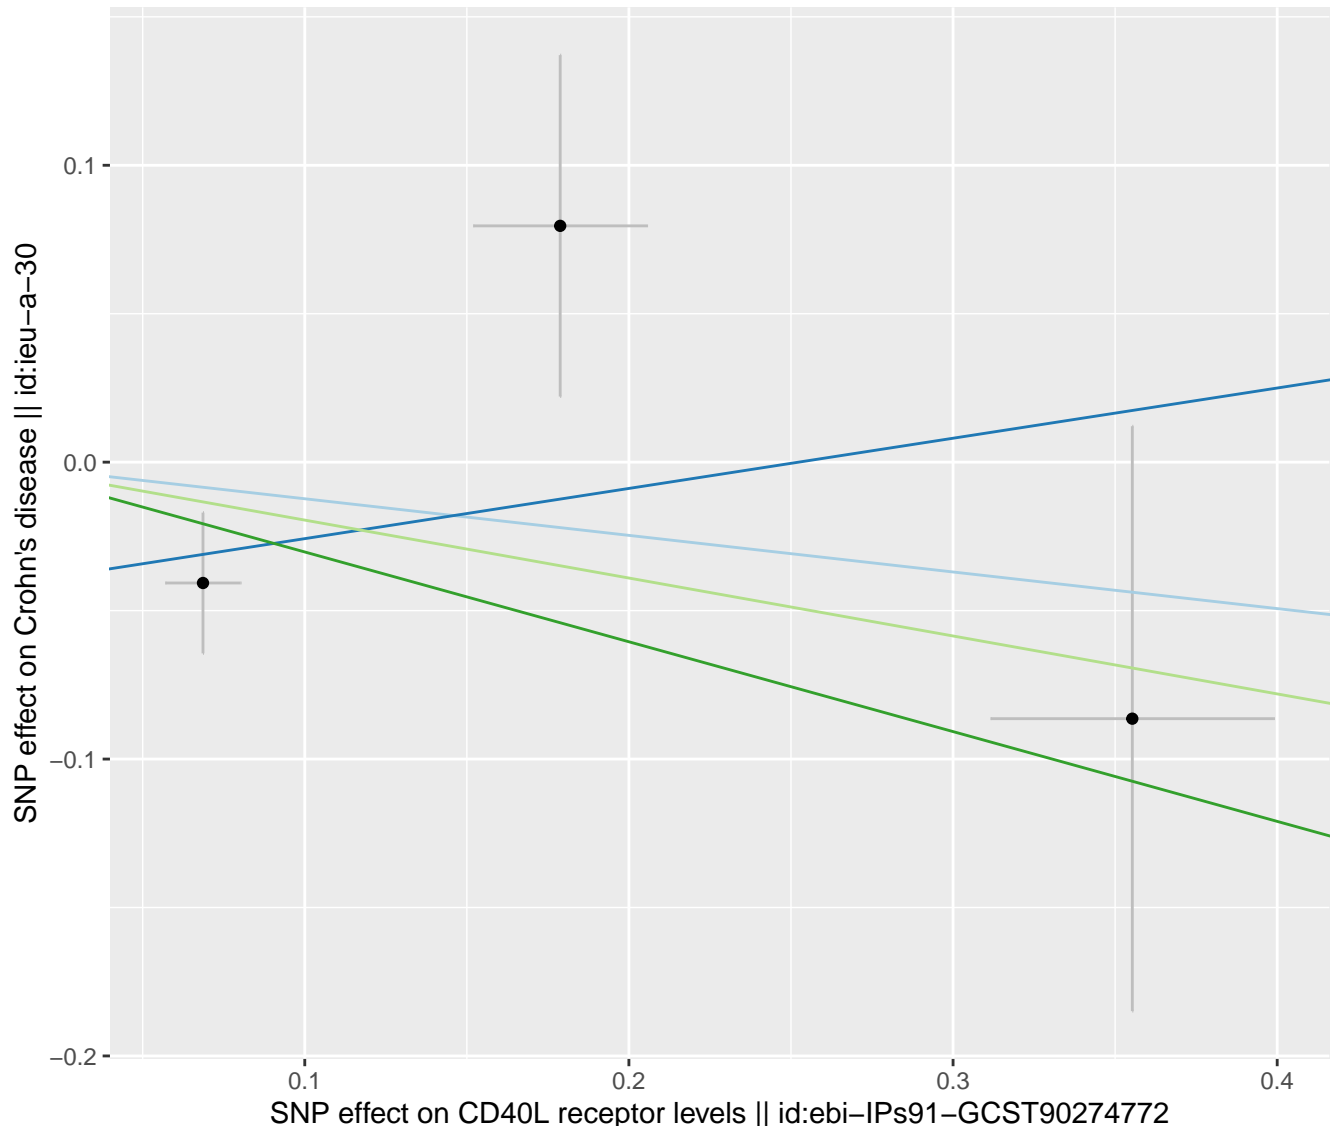

### MR Test

- Inverse variance weighted
- MR Egger
- Weighted median
- Weighted mode

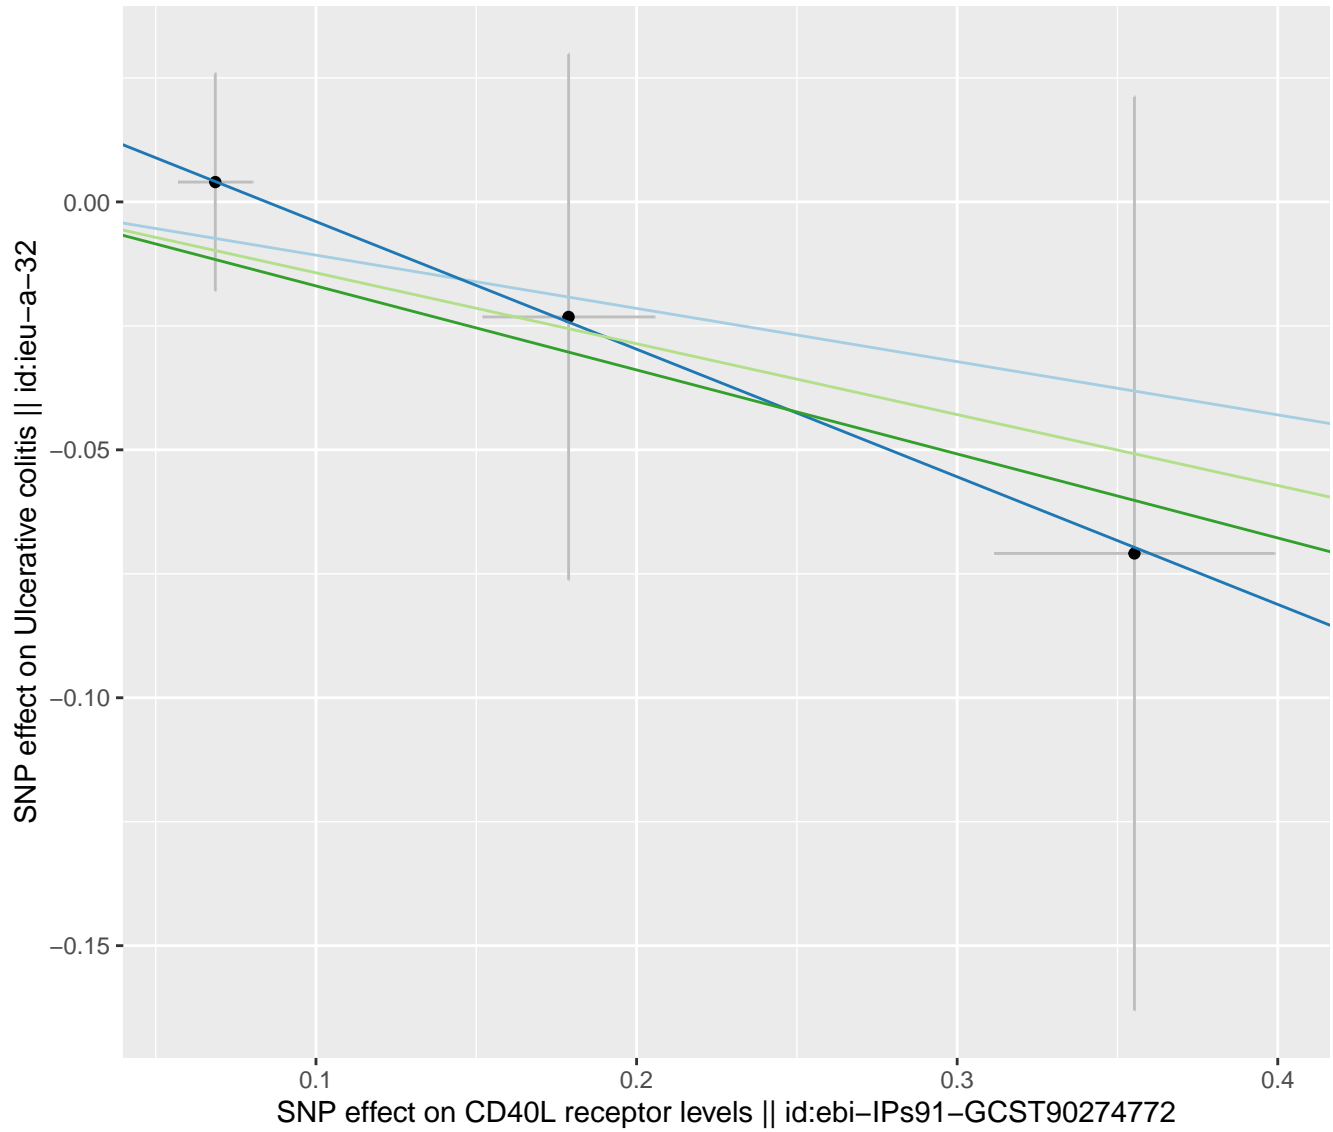

MR Test

- Inverse variance weighted
- MR Egger
- Weighted median
- Weighted mode

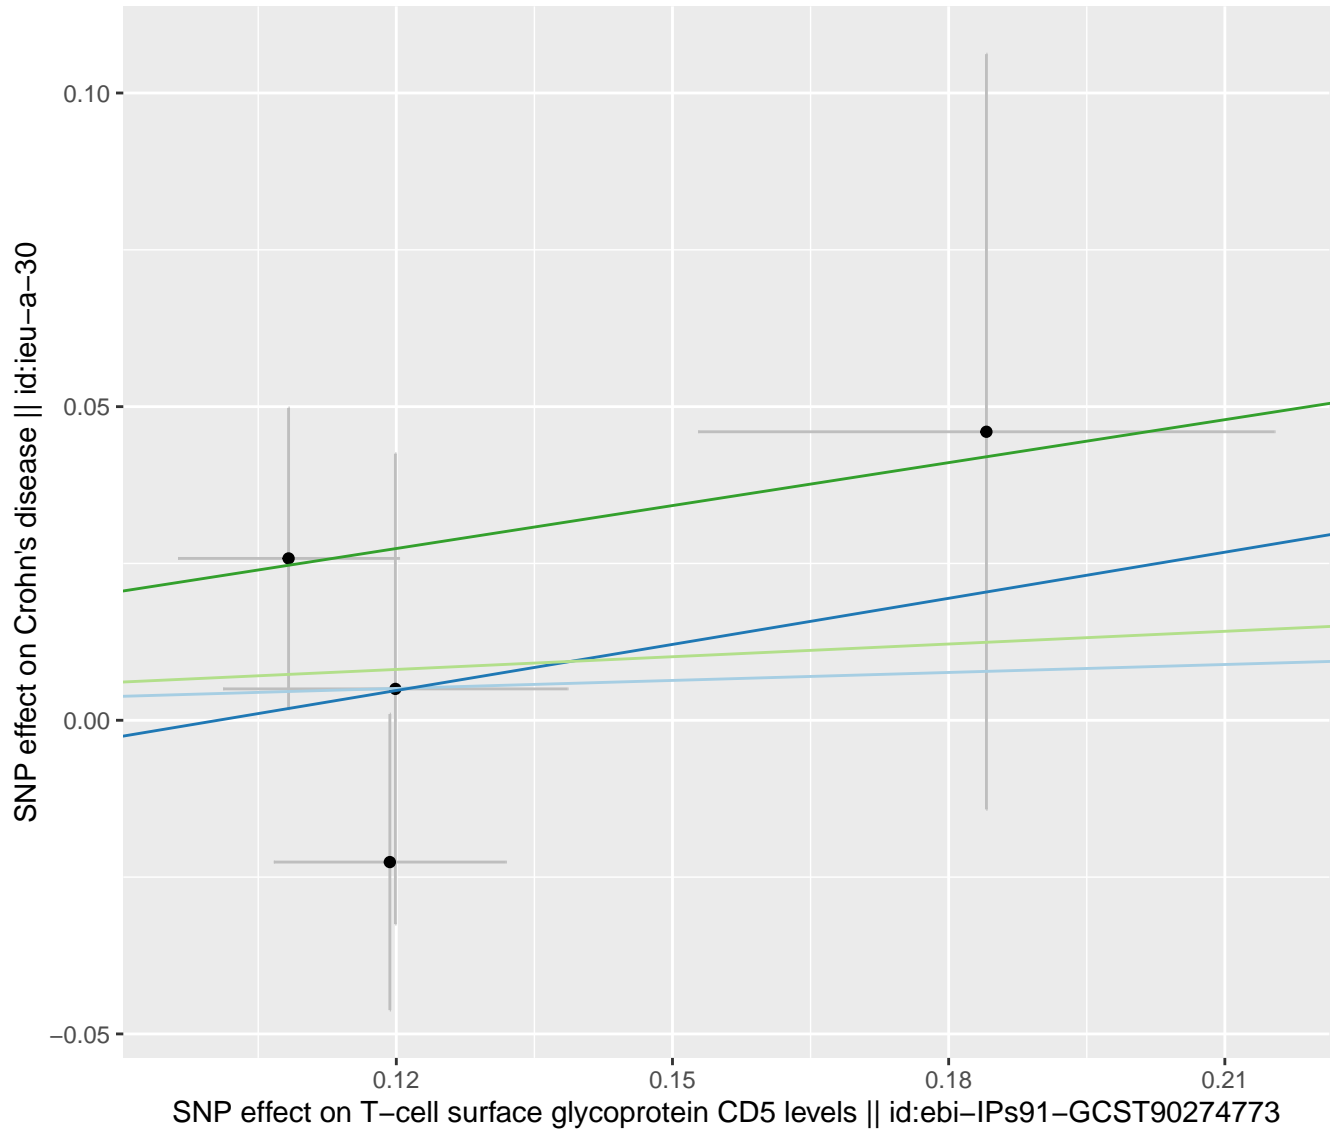

### MR Test

- Inverse variance weighted
- MR Egger
- Weighted median
- Weighted mode

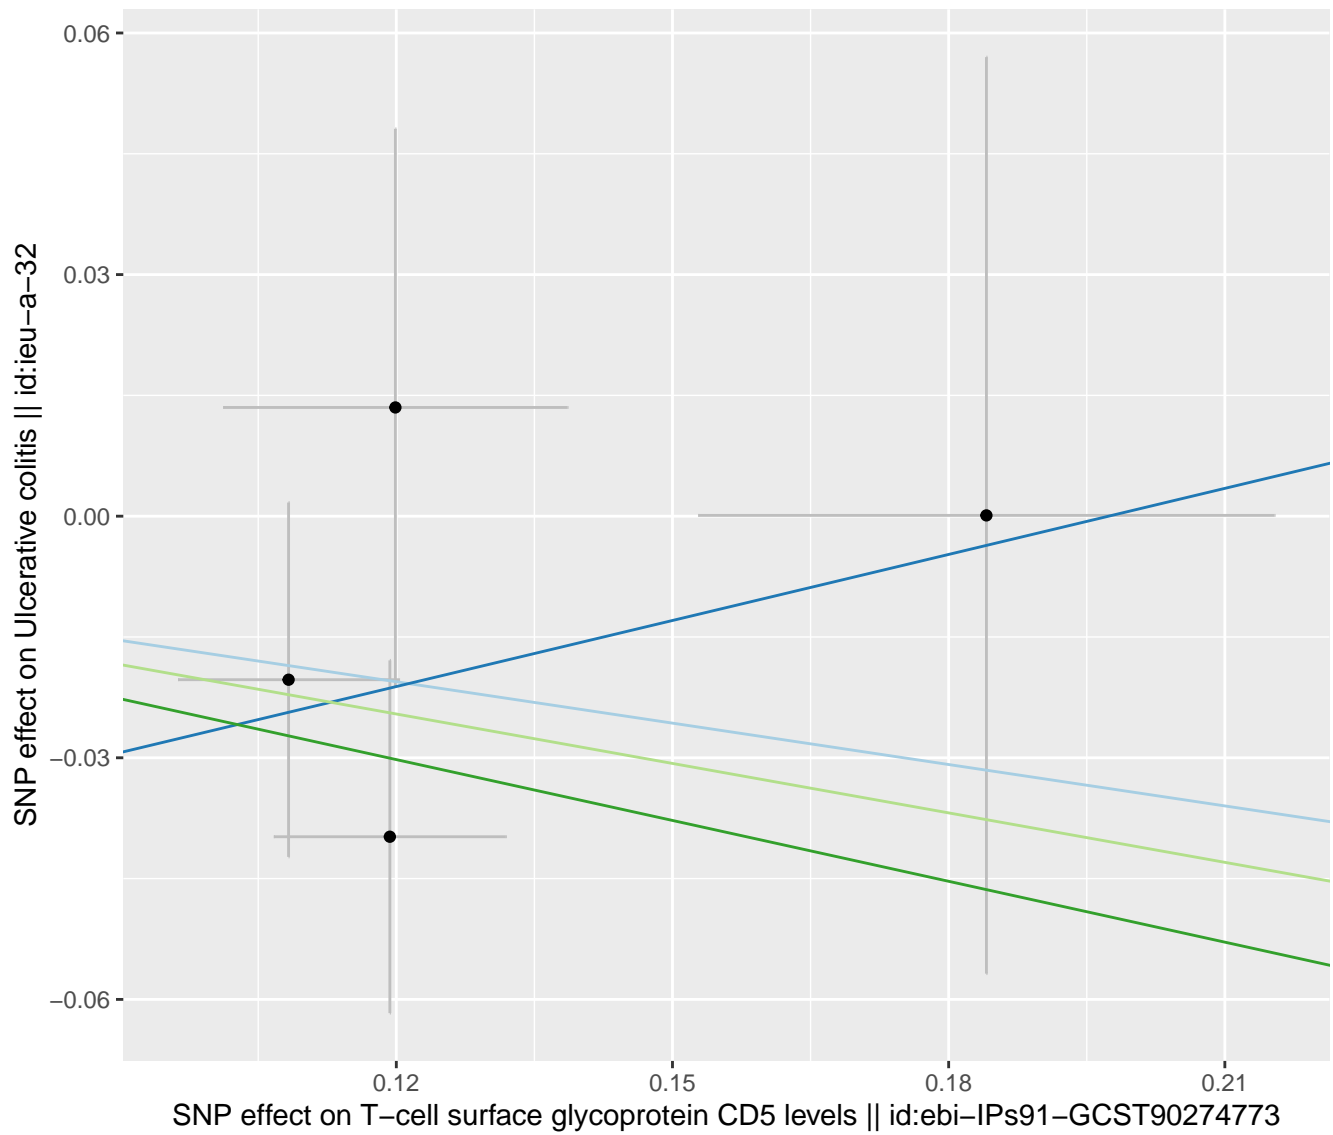

MR Test

- Inverse variance weighted
- MR Egger
- Weighted median
- Weighted mode

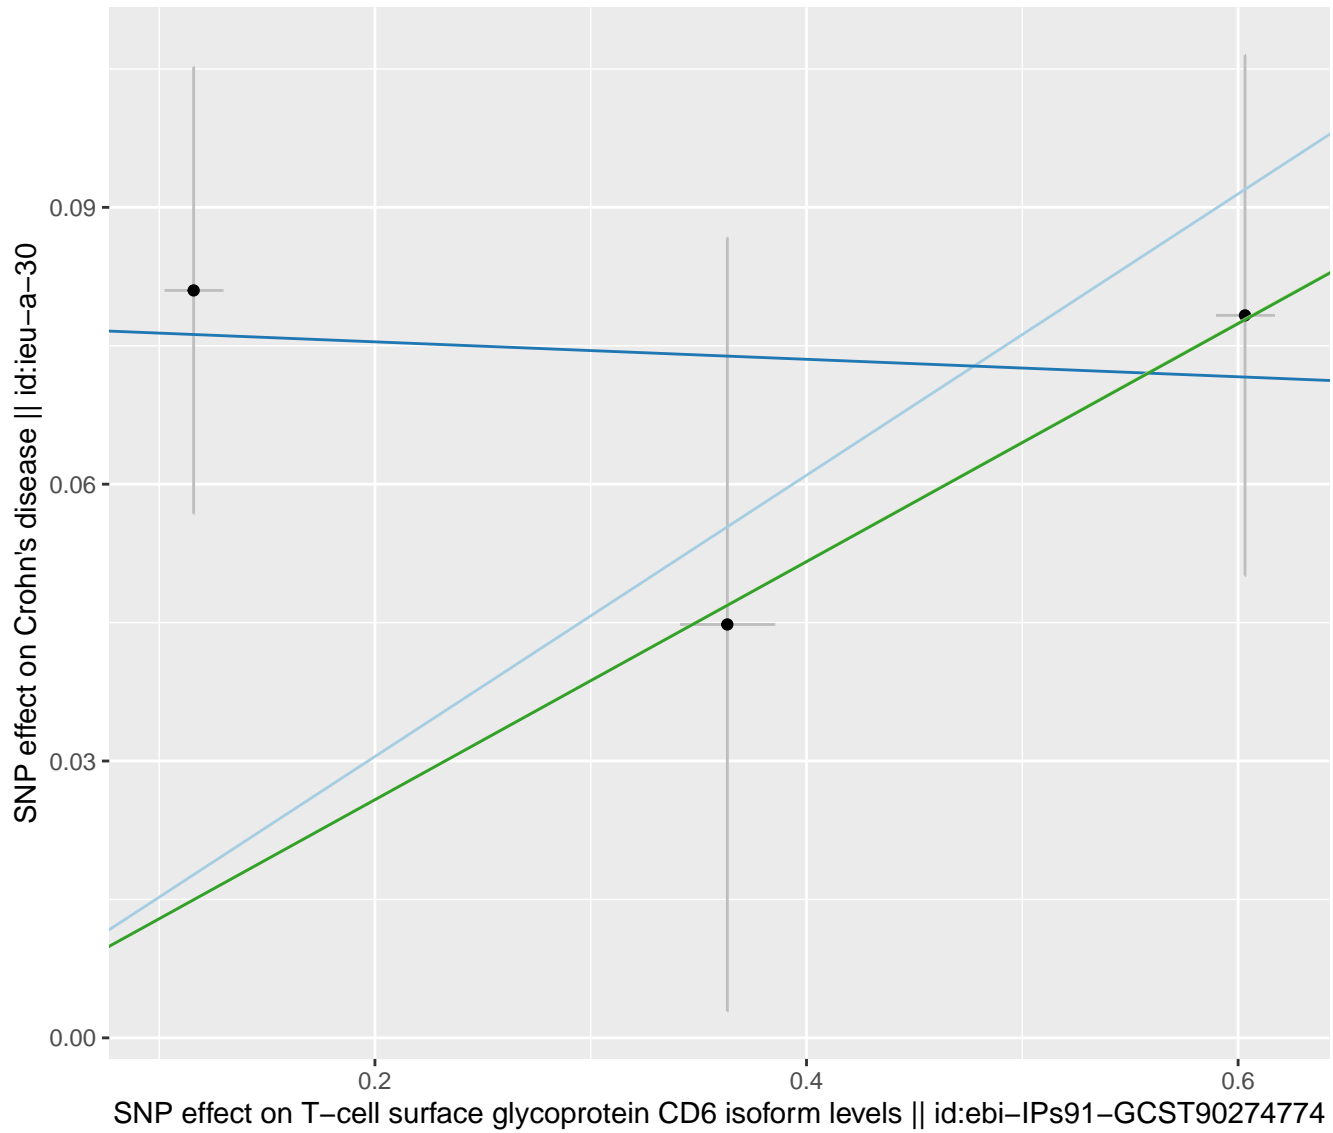

MR Test

- Inverse variance weighted
- MR Egger
- Weighted median
- Weighted mode

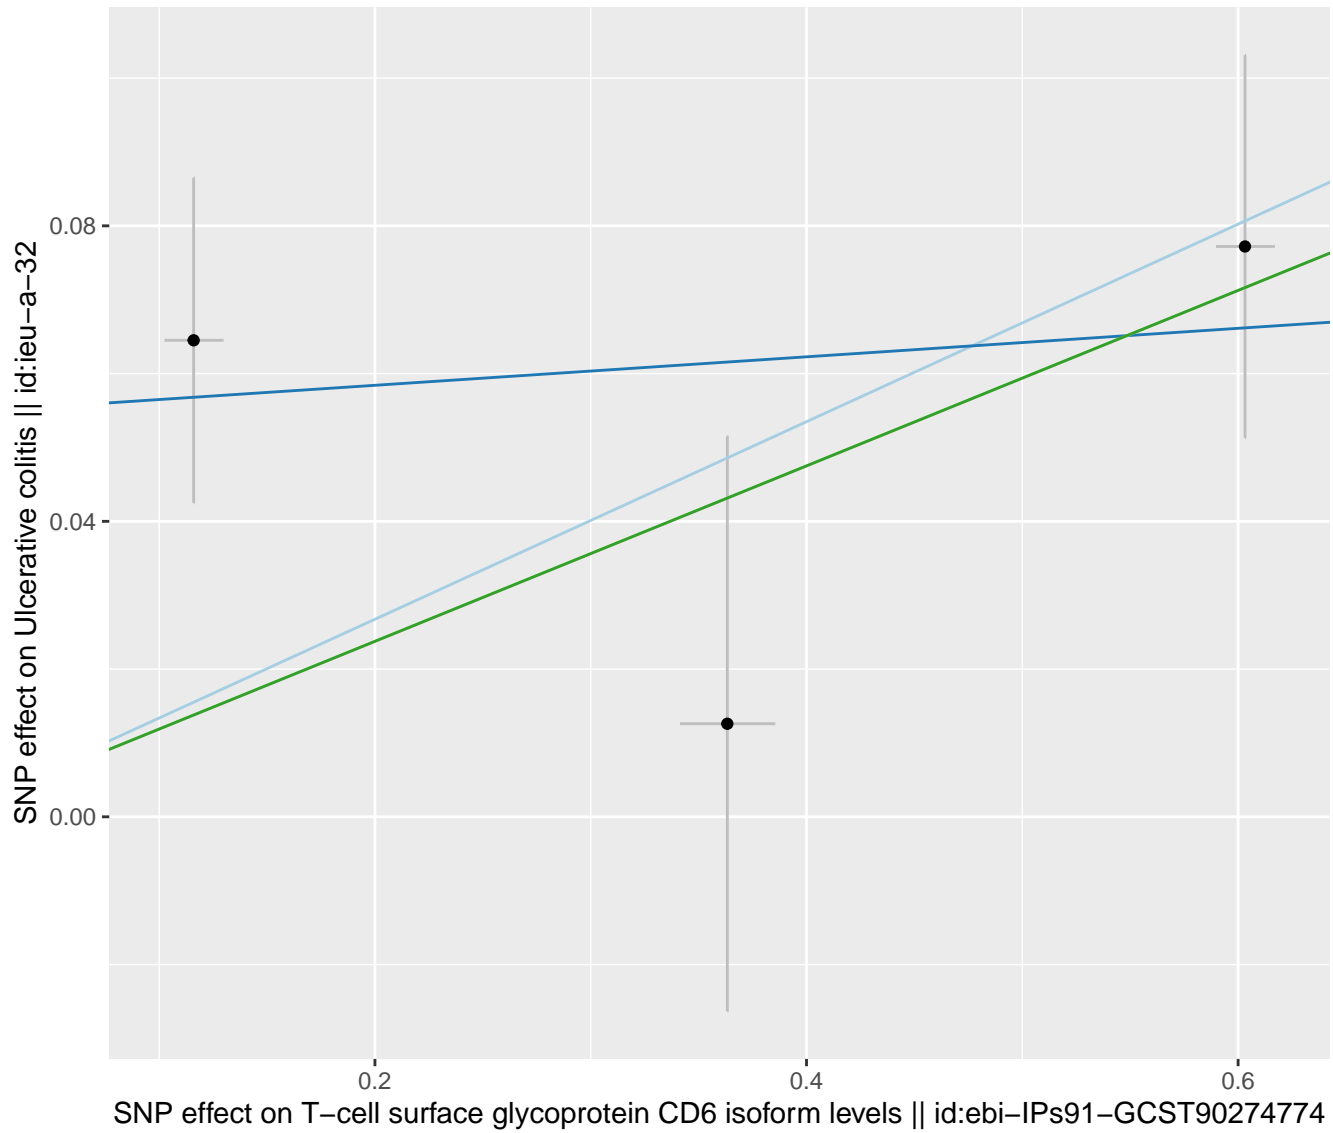



### MR Test

- Inverse variance weighted
- MR Egger
- Weighted median
- Weighted mode

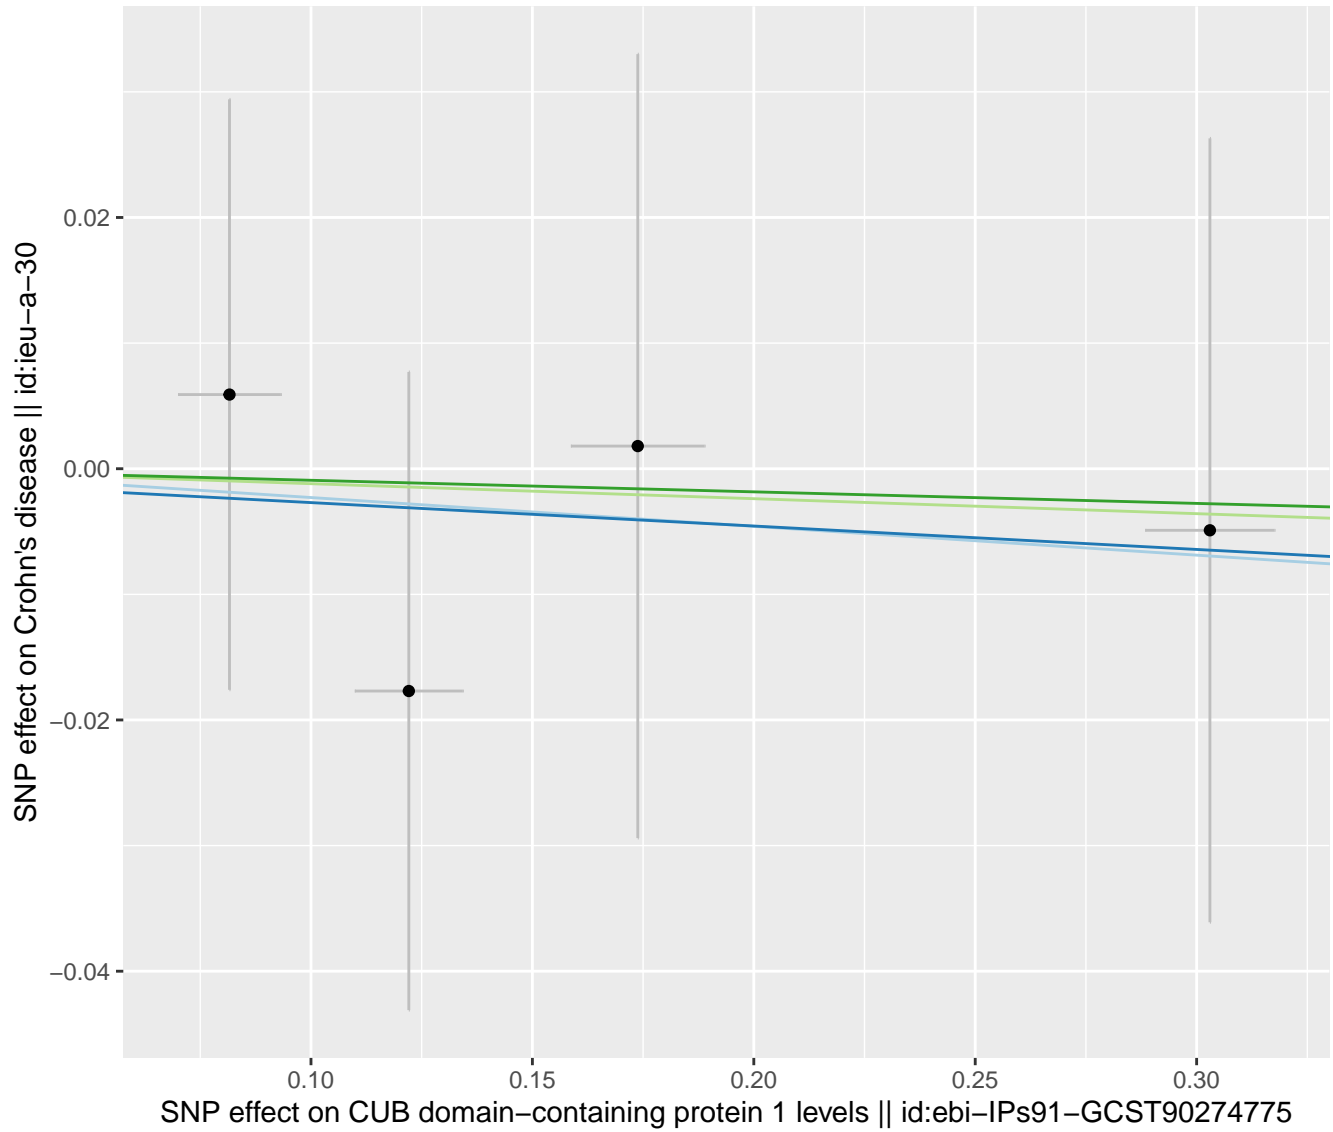

### MR Test

- Inverse variance weighted
- MR Egger
- Weighted median
- Weighted mode

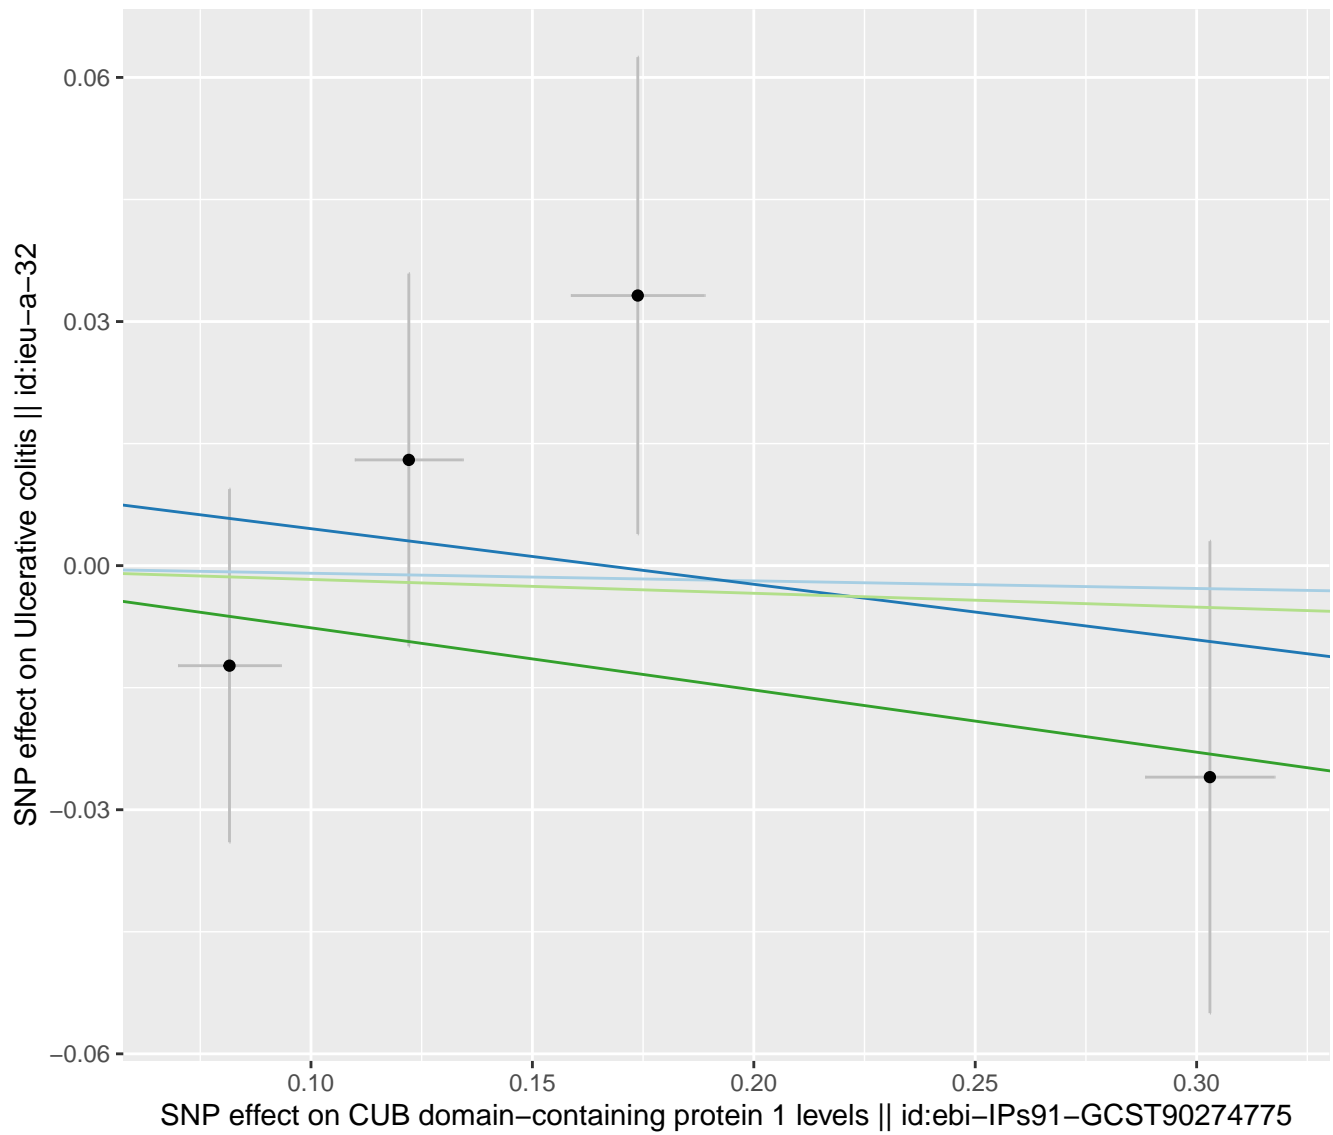

### MR Test

- Inverse variance weighted
- MR Egger
- Weighted median
- Weighted mode

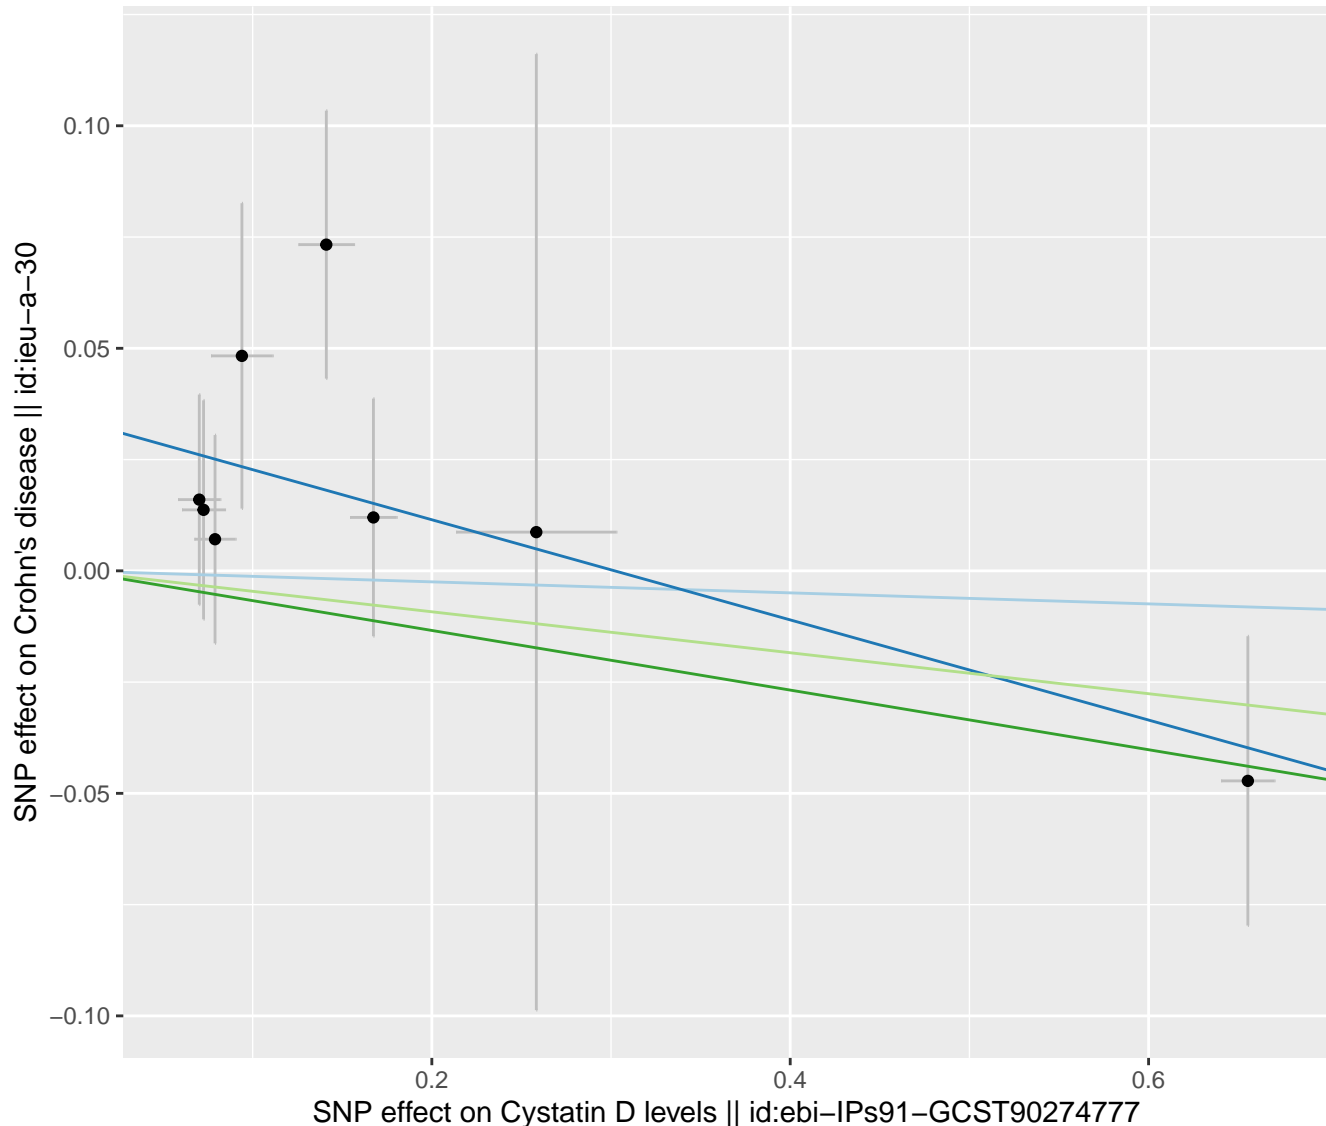

MR Test

- Inverse variance weighted
- MR Egger
- Weighted median
- Weighted mode

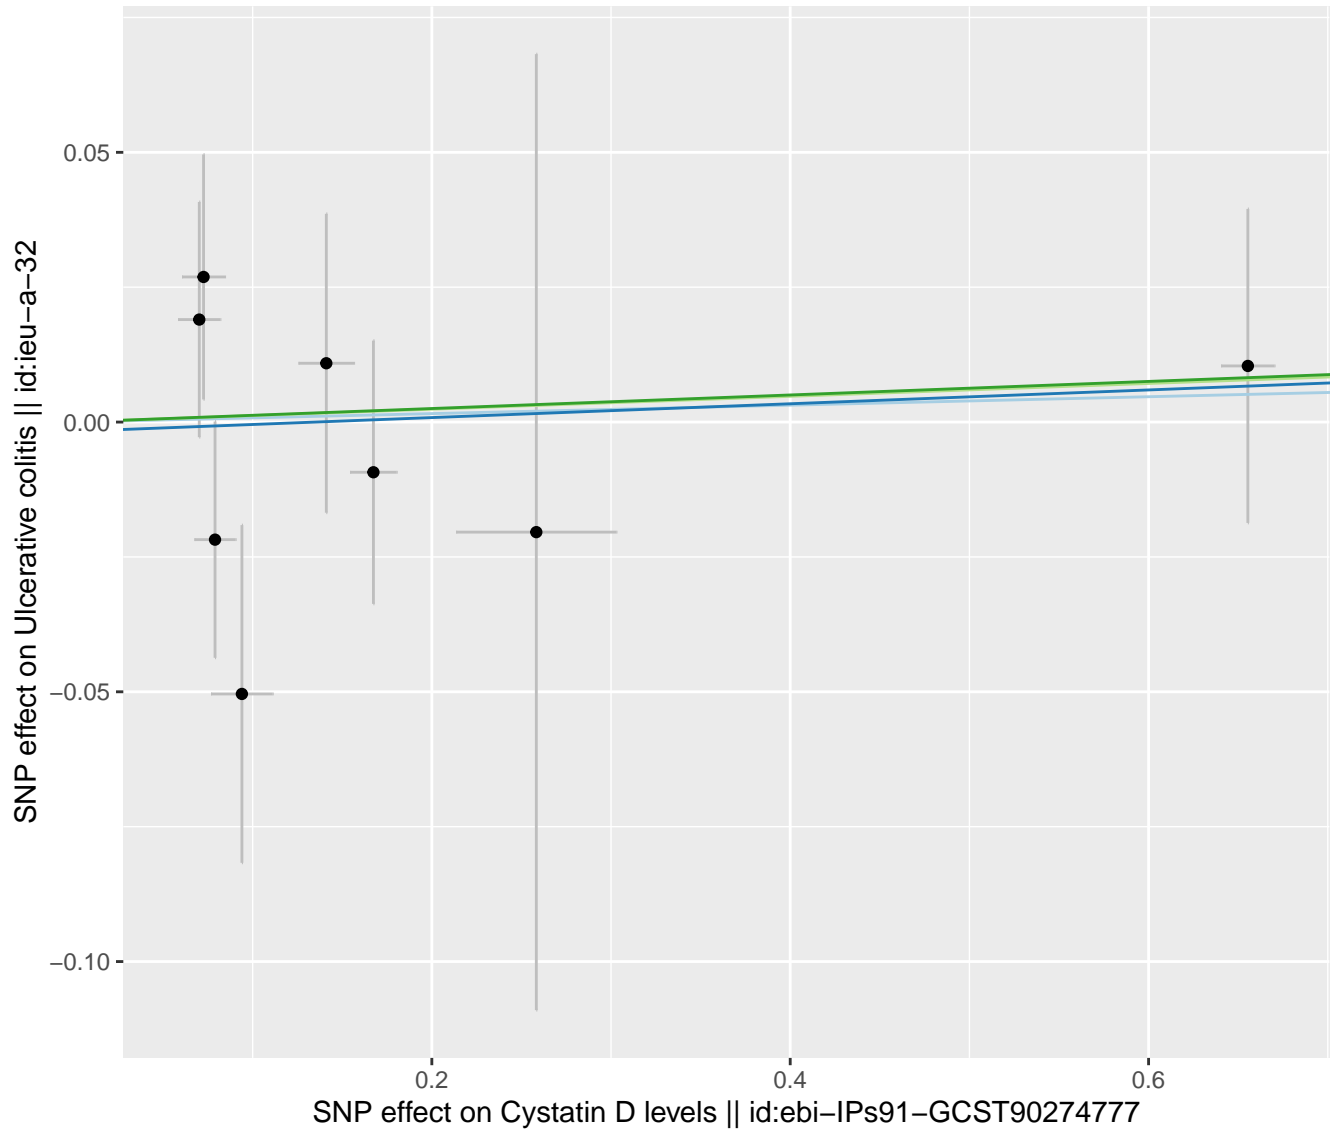

### MR Test

- Inverse variance weighted
- MR Egger
- Weighted median
- Weighted mode

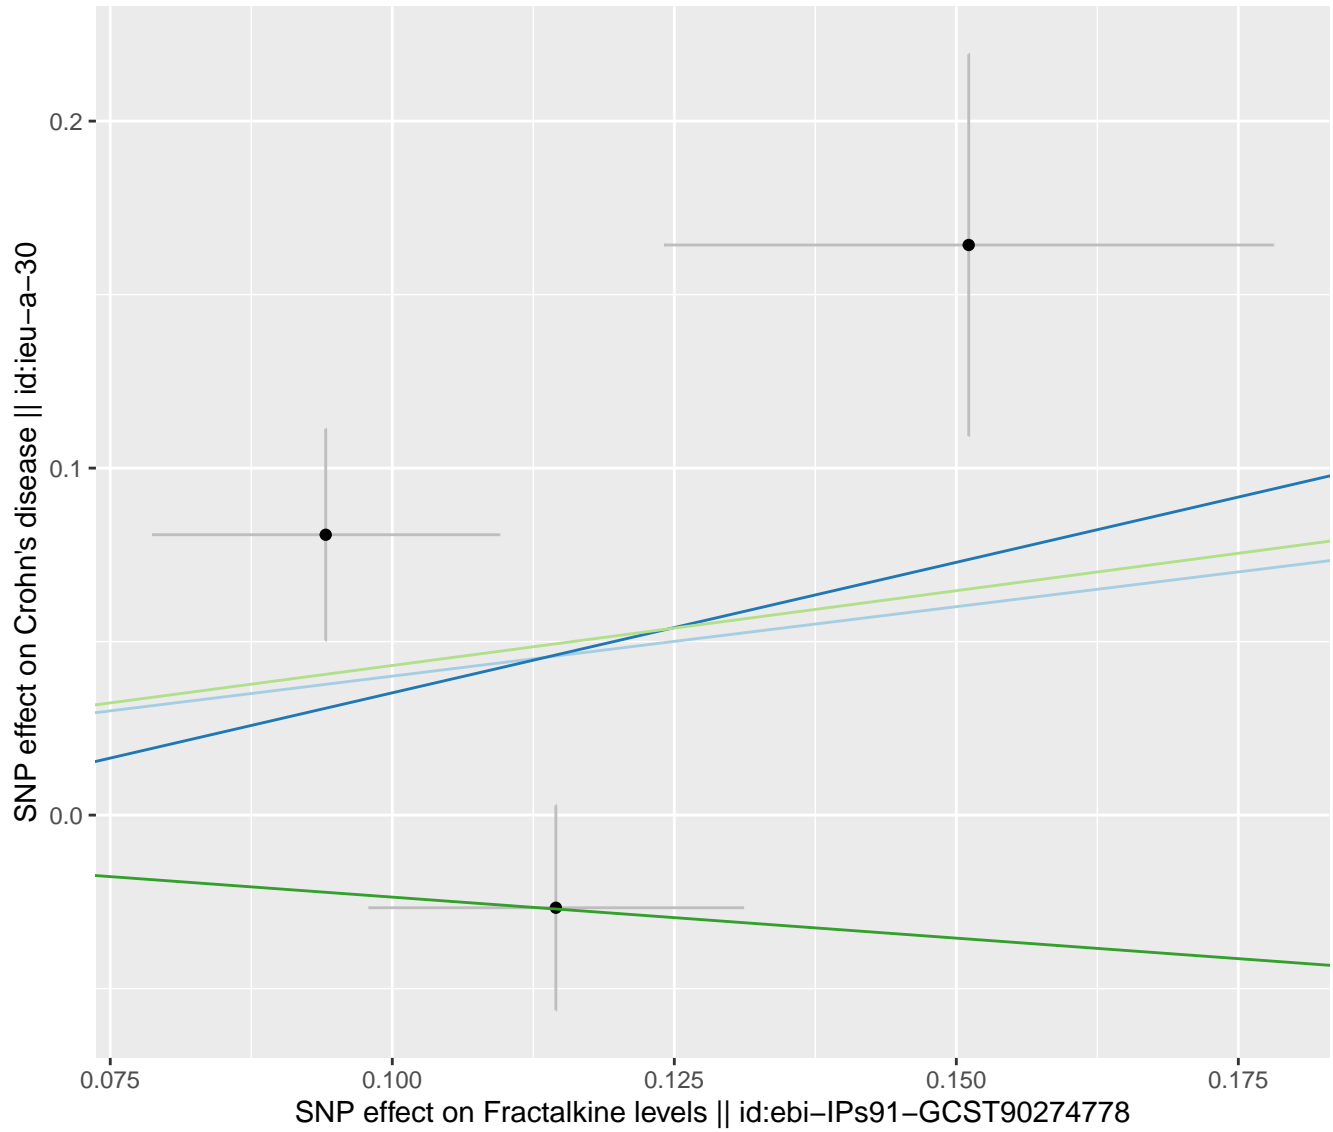

### MR Test

- Inverse variance weighted
- MR Egger
- Weighted median
- Weighted mode

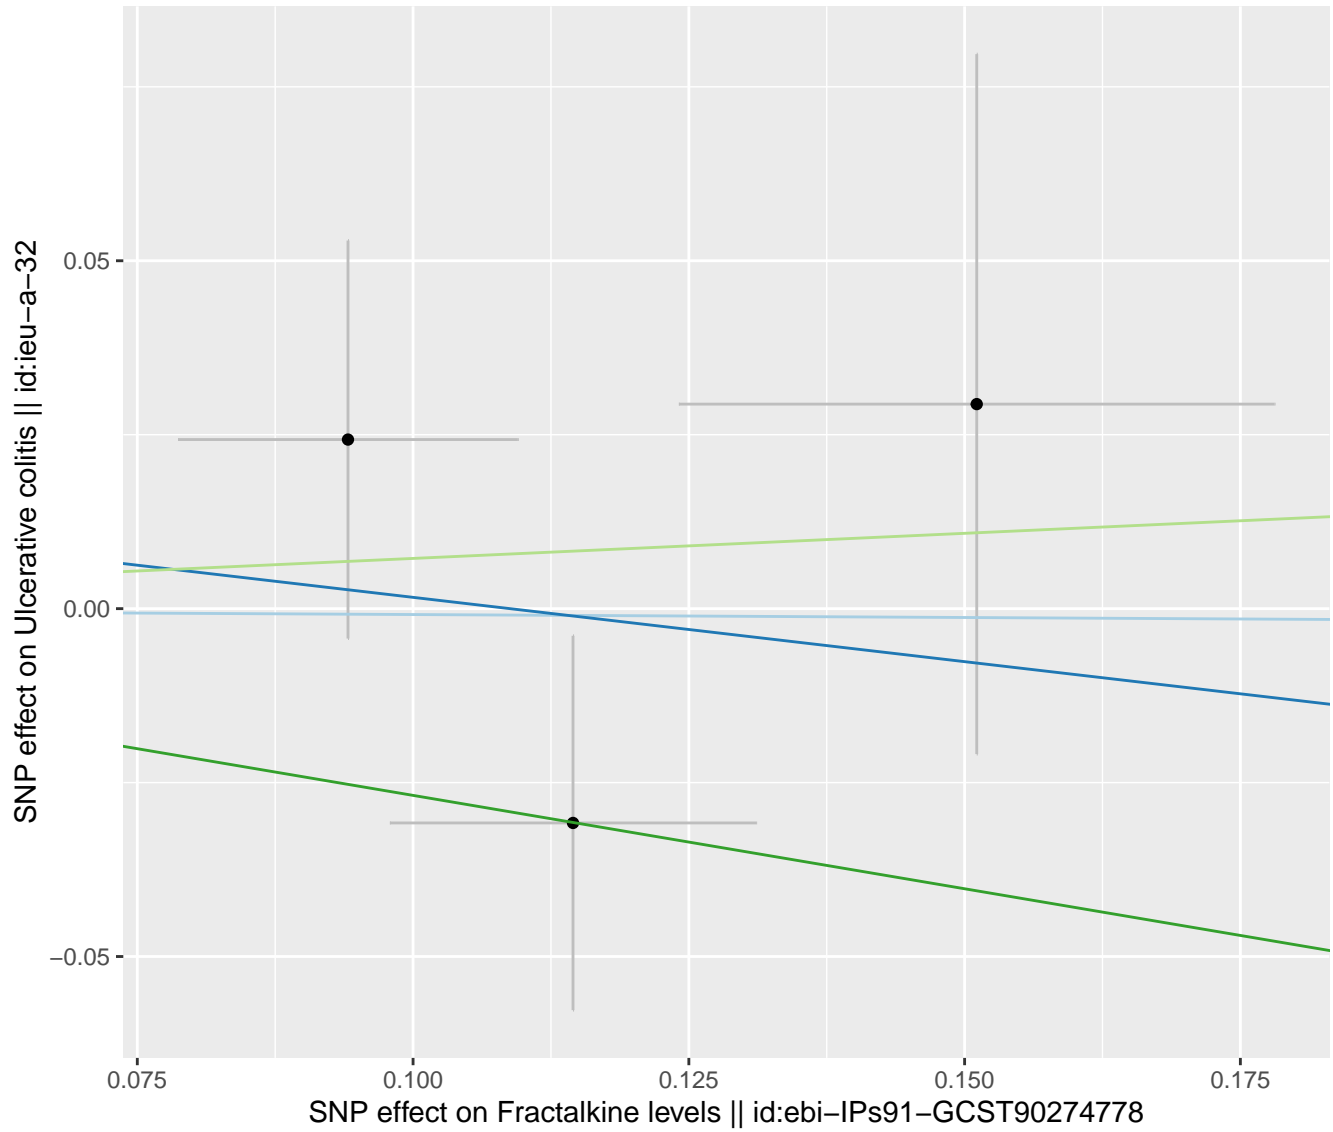

MR Test

Inverse variance weighted

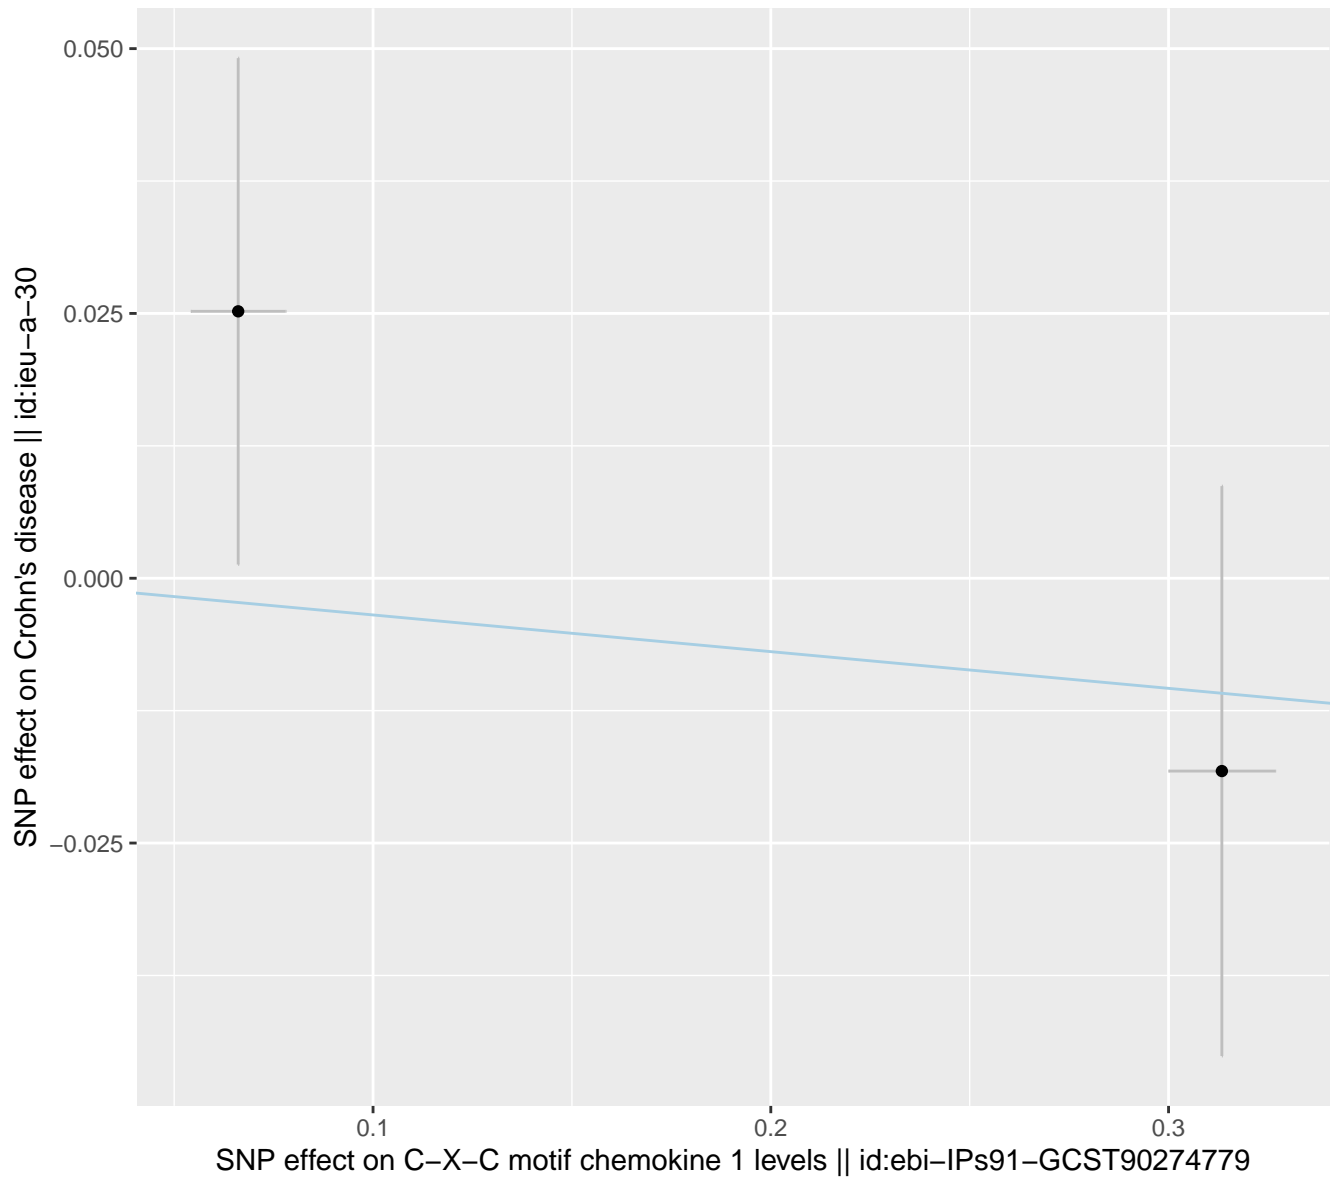

### MR Test

Inverse variance weighted

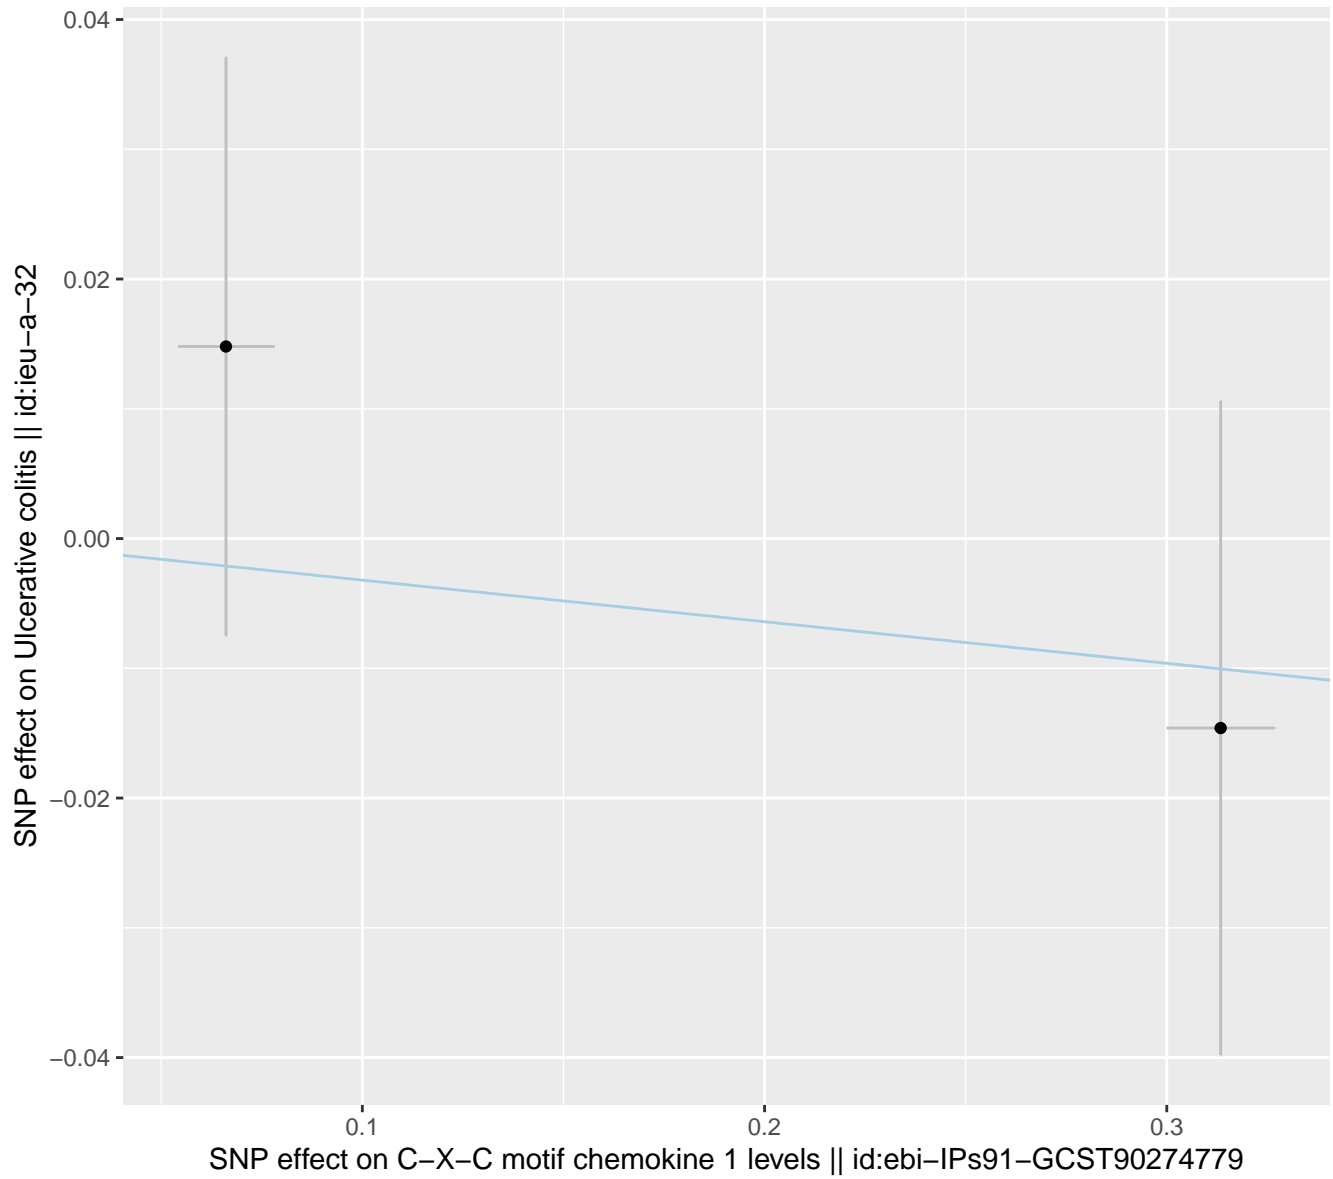



MR Test

- Inverse variance weighted
- MR Egger
- Weighted median
- Weighted mode

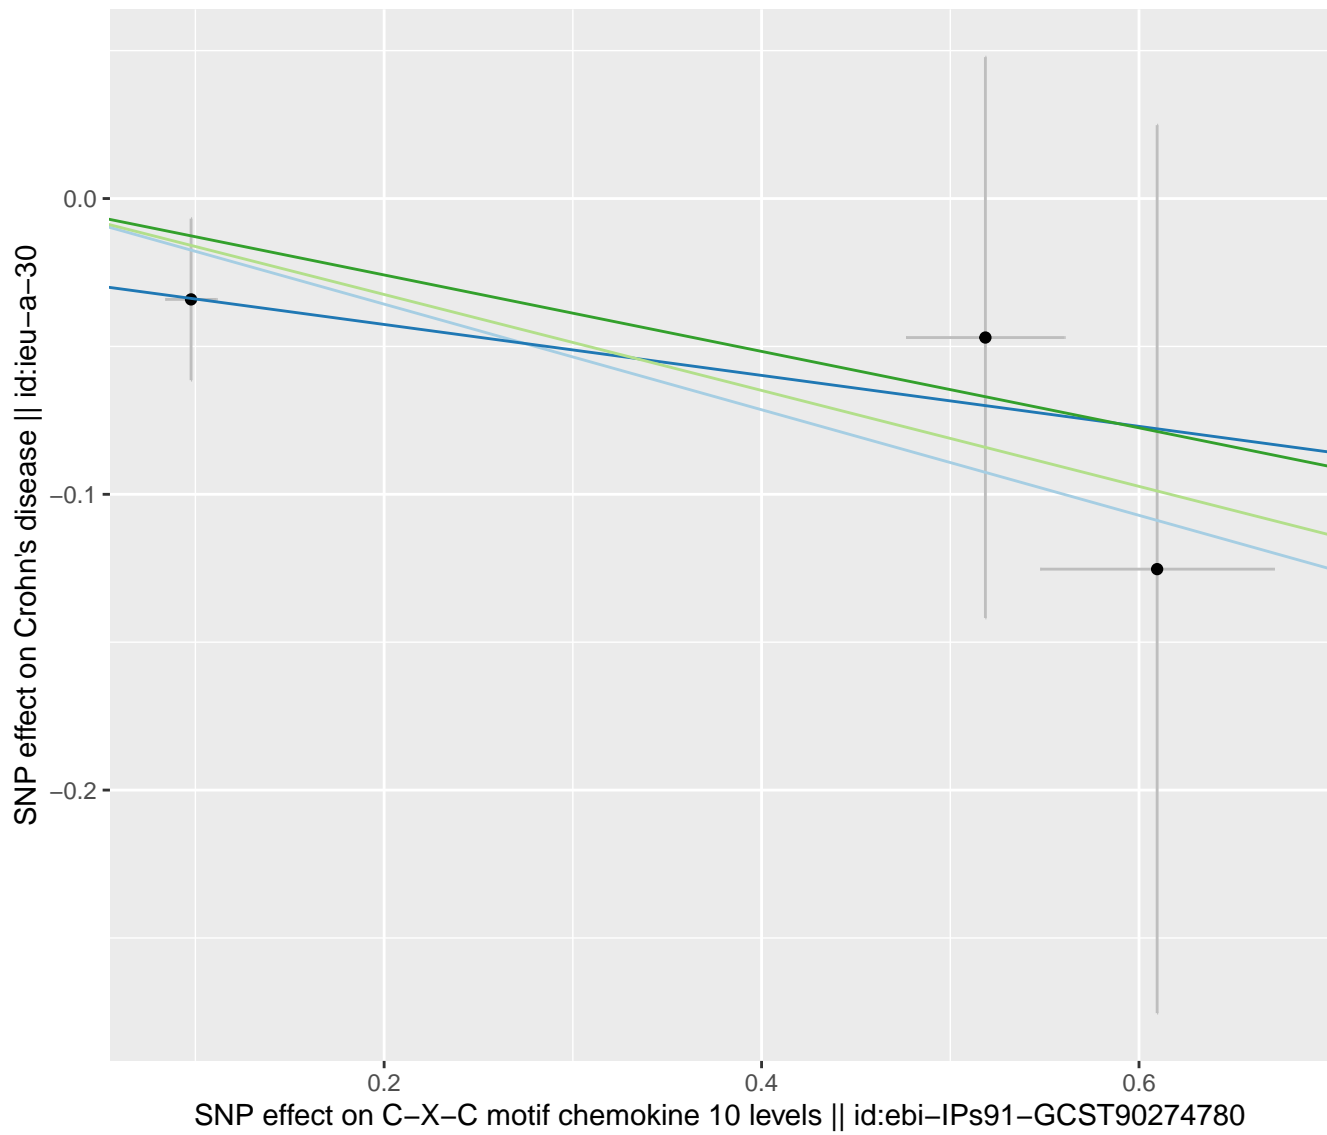

MR Test

- Inverse variance weighted
- MR Egger
- Weighted median
- Weighted mode

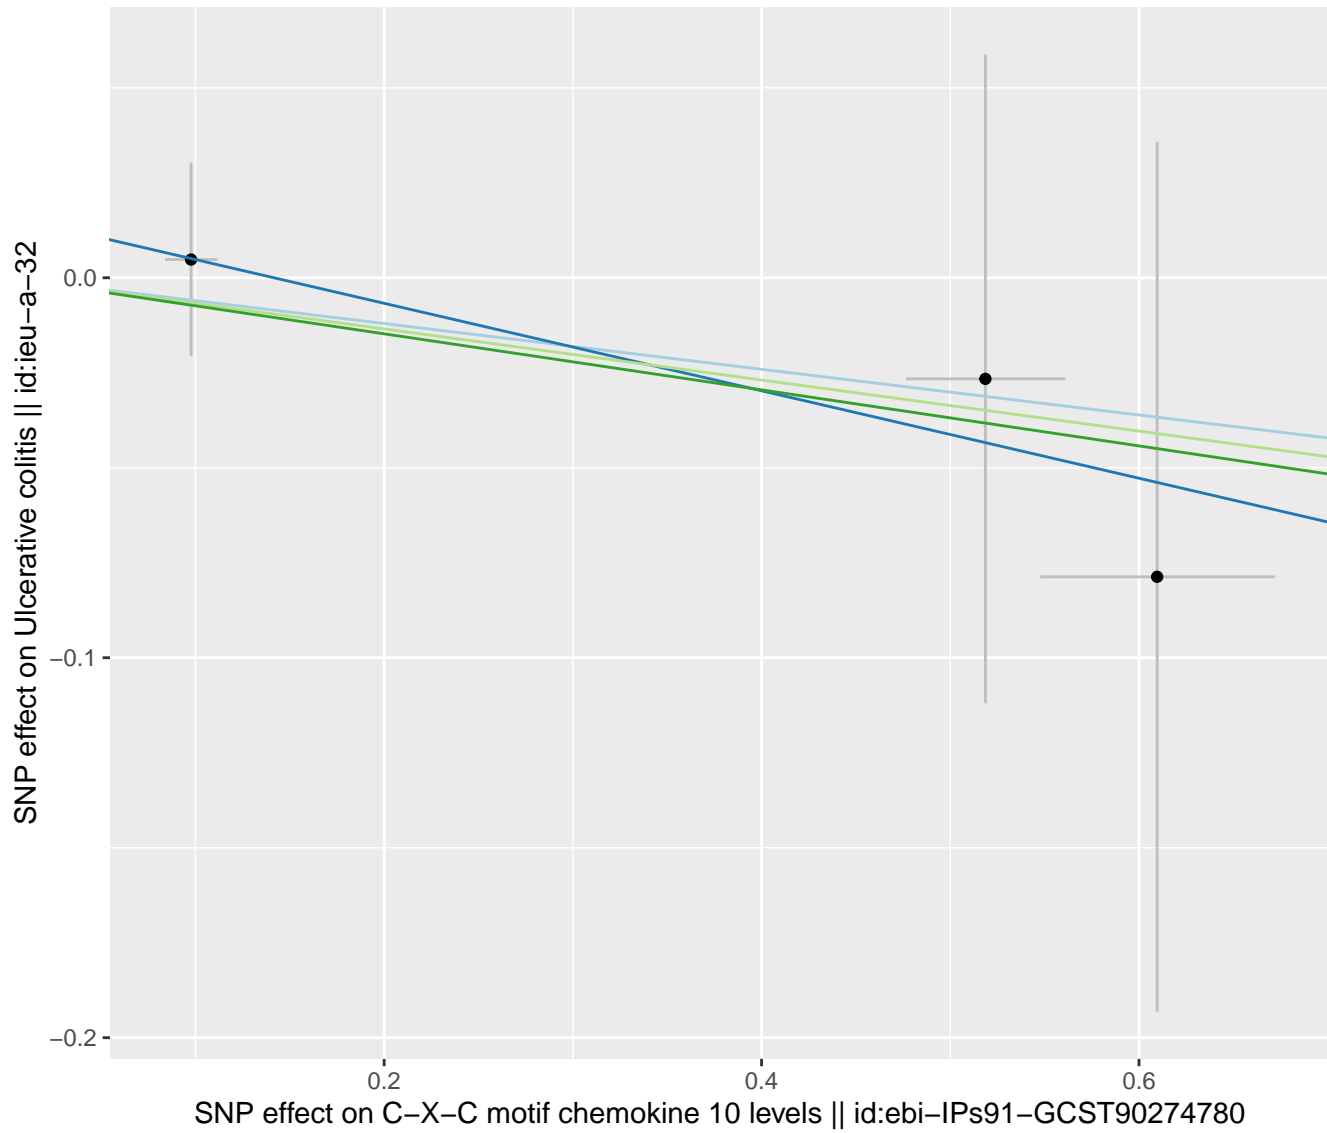

MR Test

- Inverse variance weighted
- MR Egger
- Weighted median
- Weighted mode

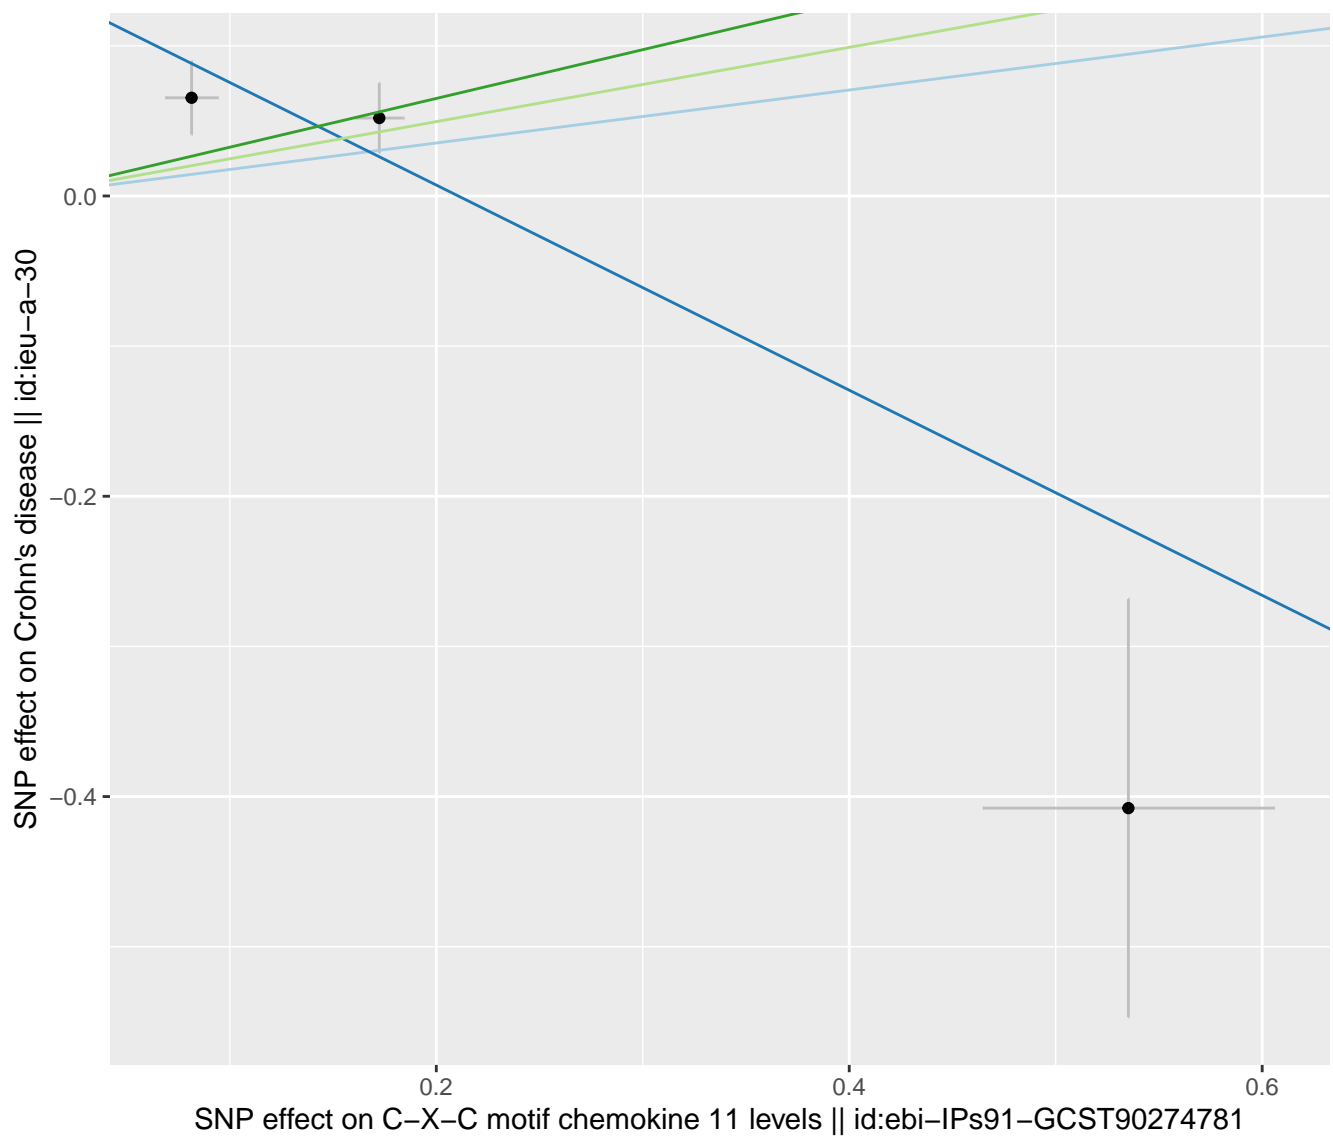

MR Test

- Inverse variance weighted
- MR Egger
- Weighted median
- Weighted mode

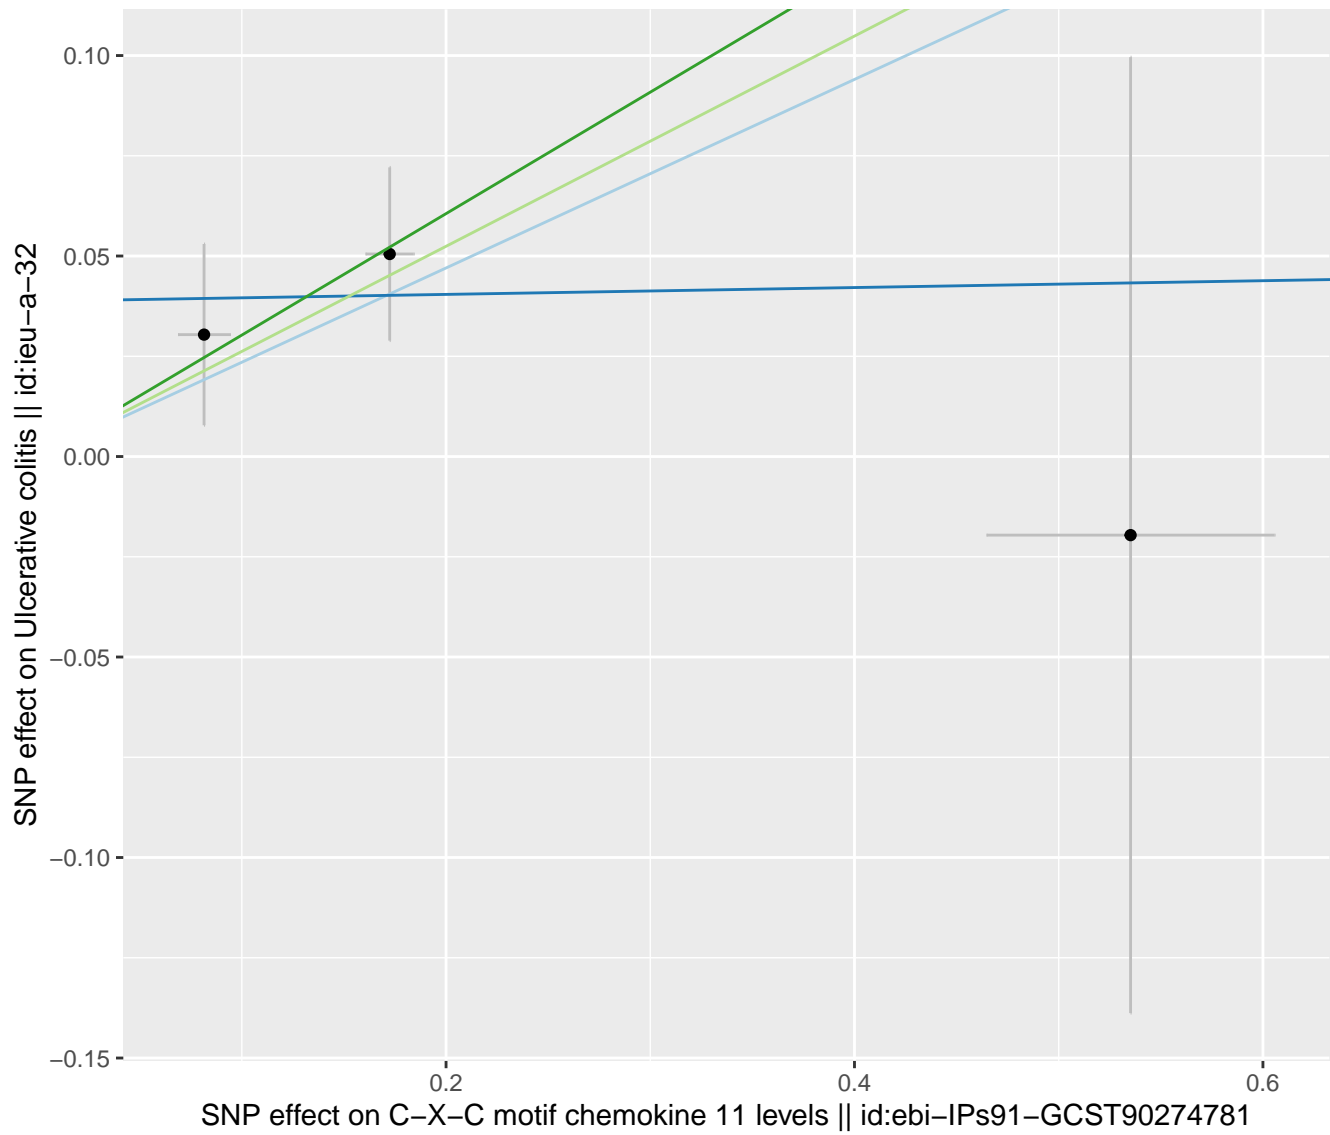

### MR Test

- Inverse variance weighted
- MR Egger
- Weighted median
- Weighted mode

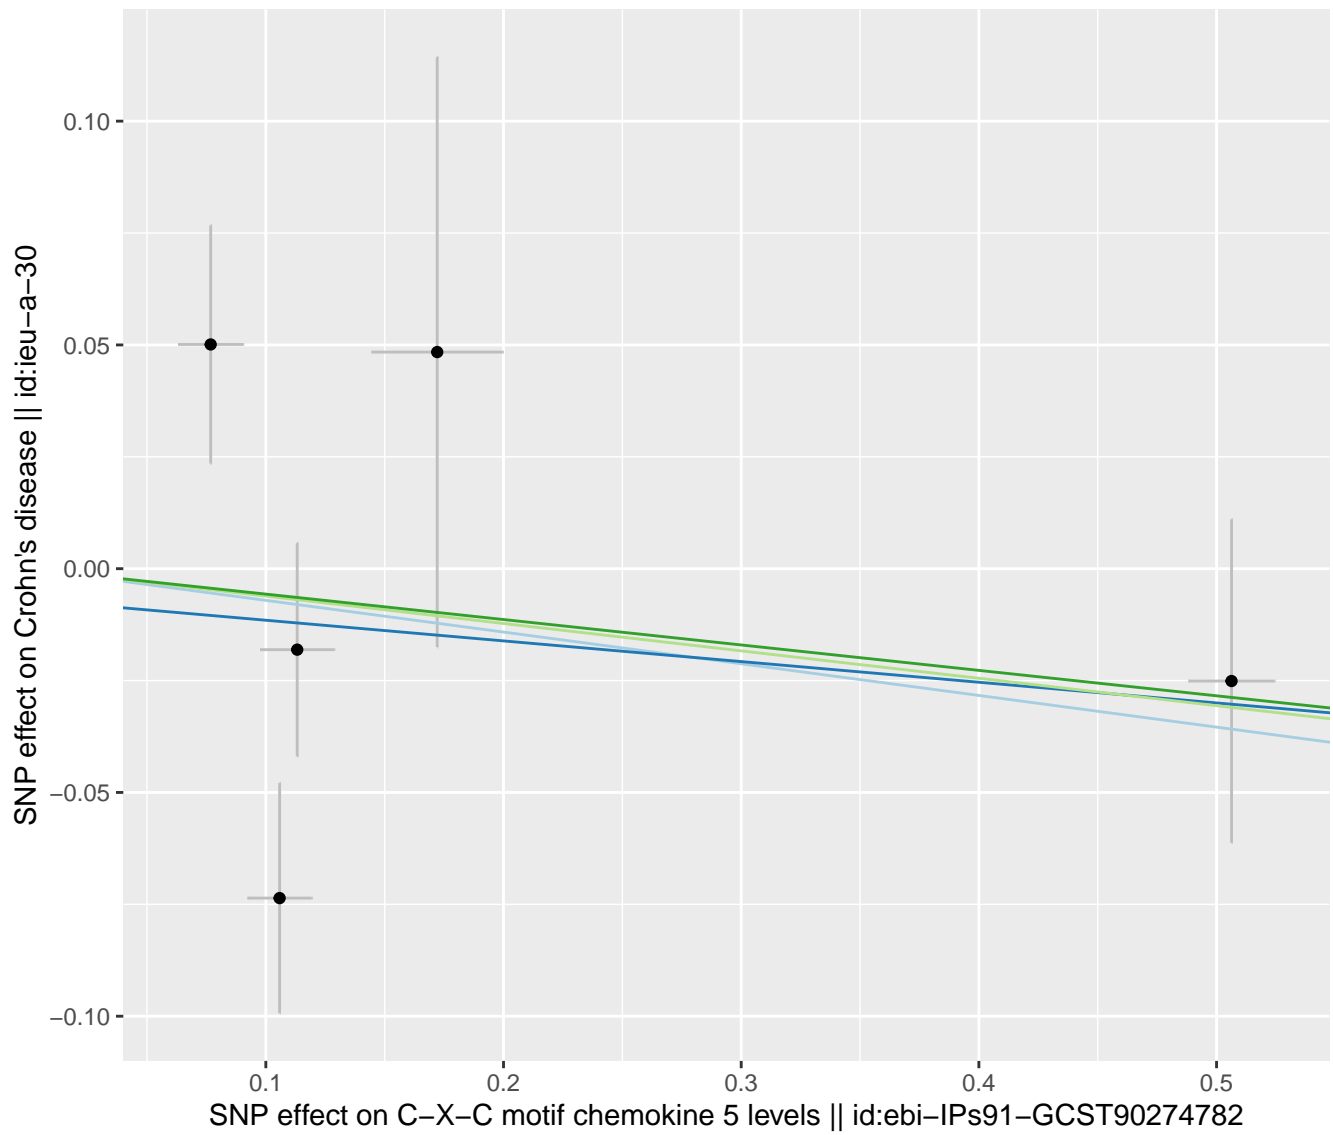

### MR Test

- Inverse variance weighted
- MR Egger
- Weighted median
- Weighted mode

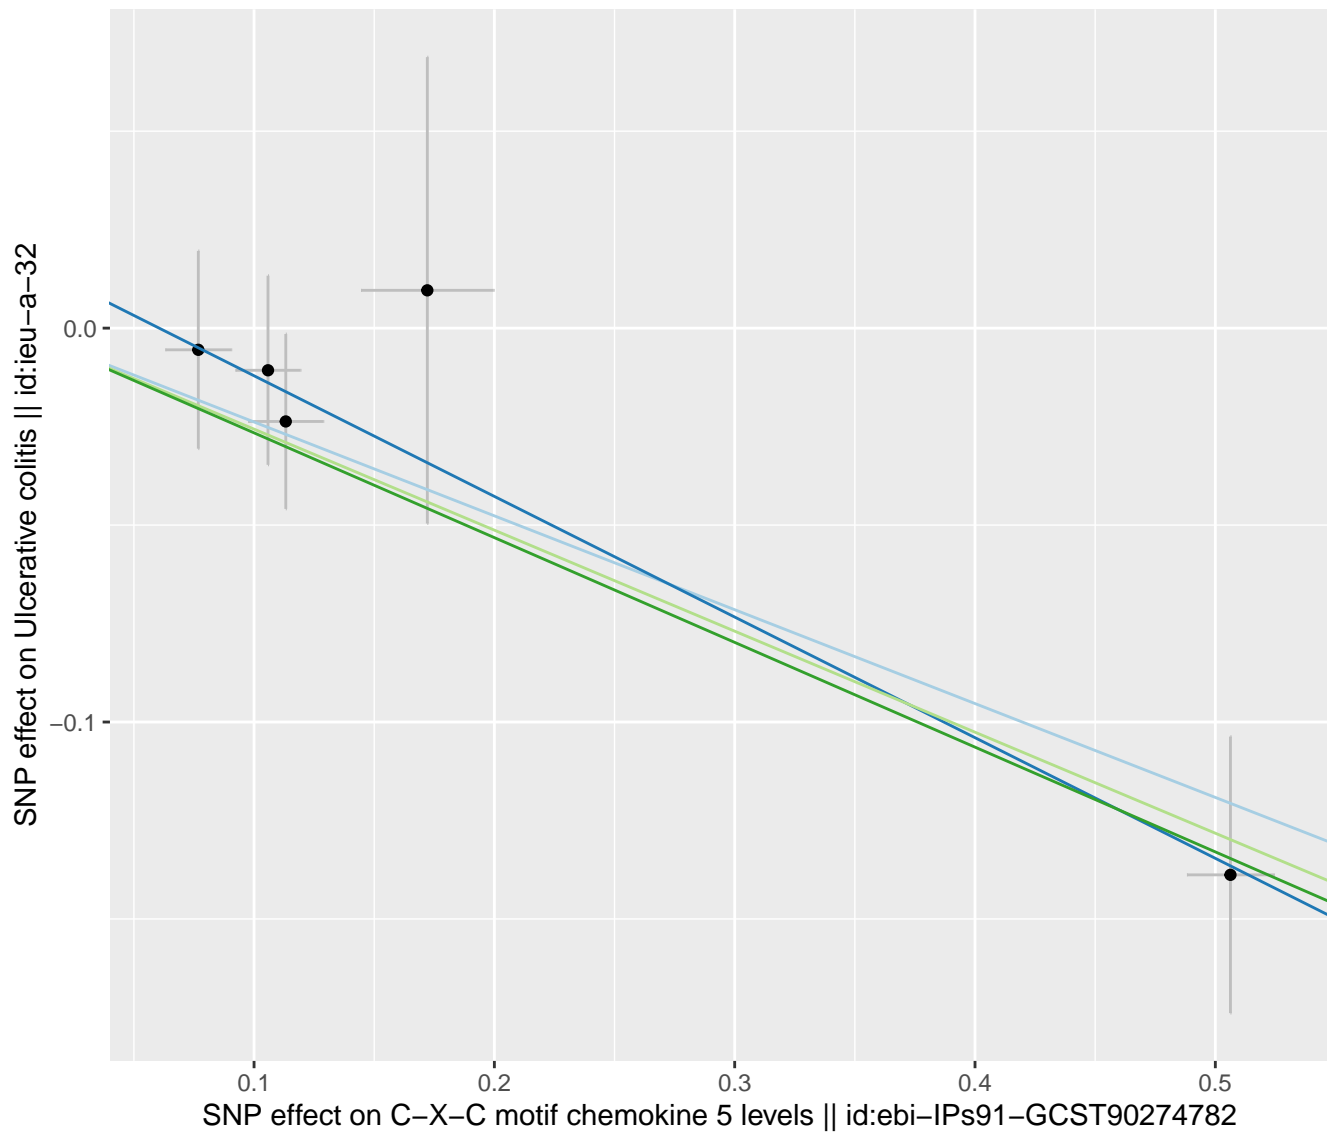

MR Test

- Inverse variance weighted
- MR Egger
- Weighted median
- Weighted mode

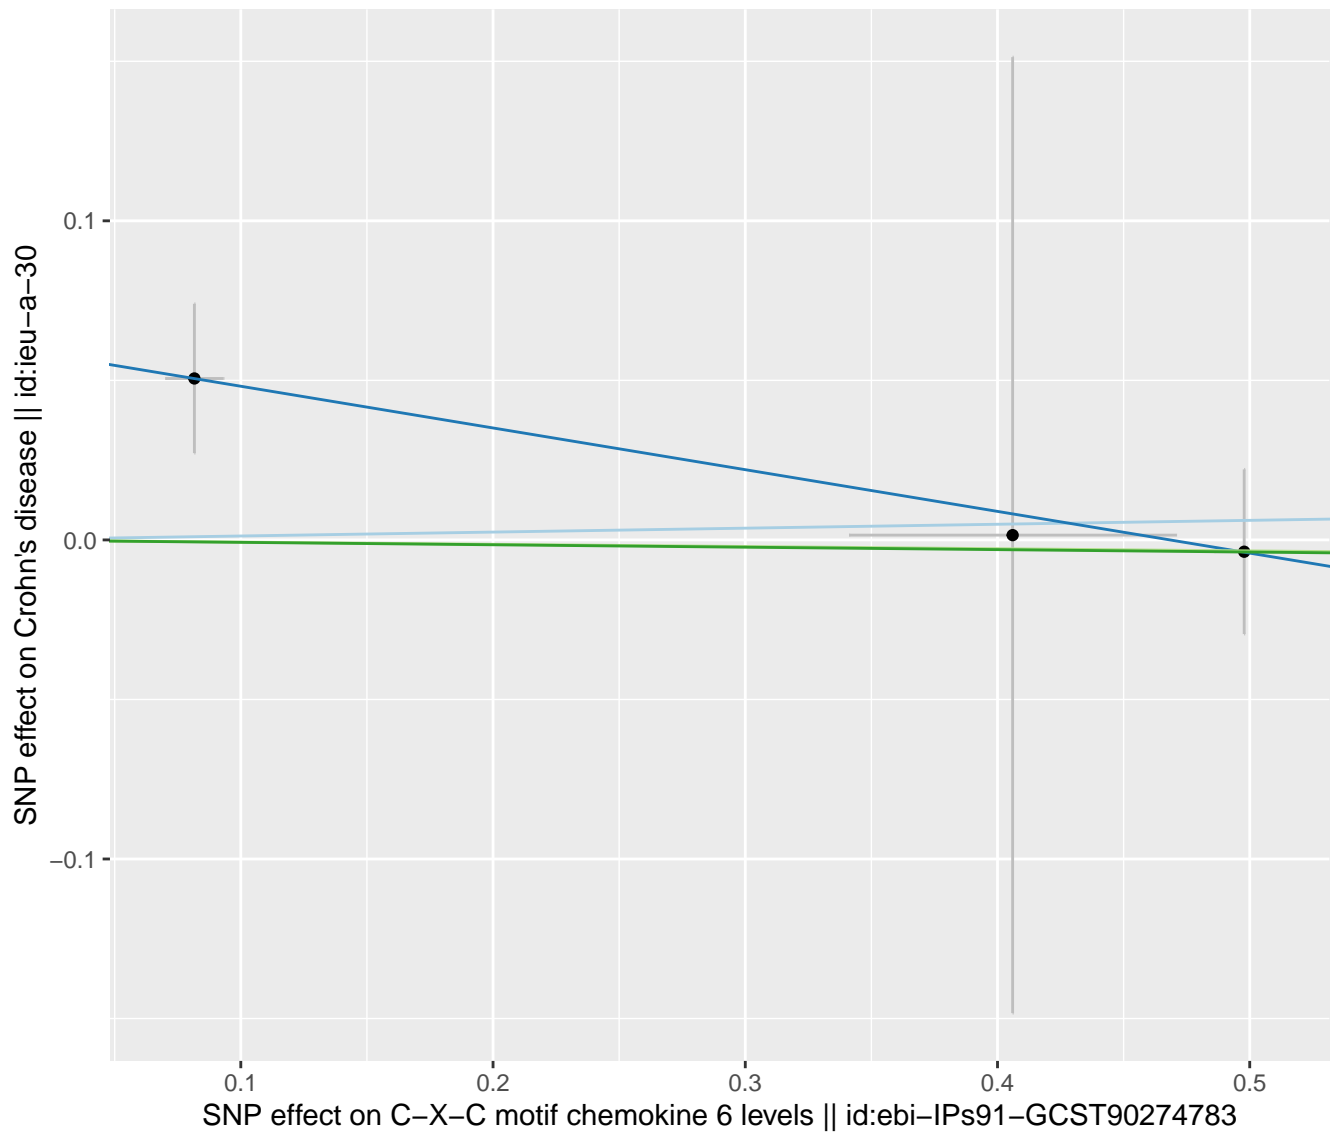

MR Test

- Inverse variance weighted
- MR Egger
- Weighted median
- Weighted mode

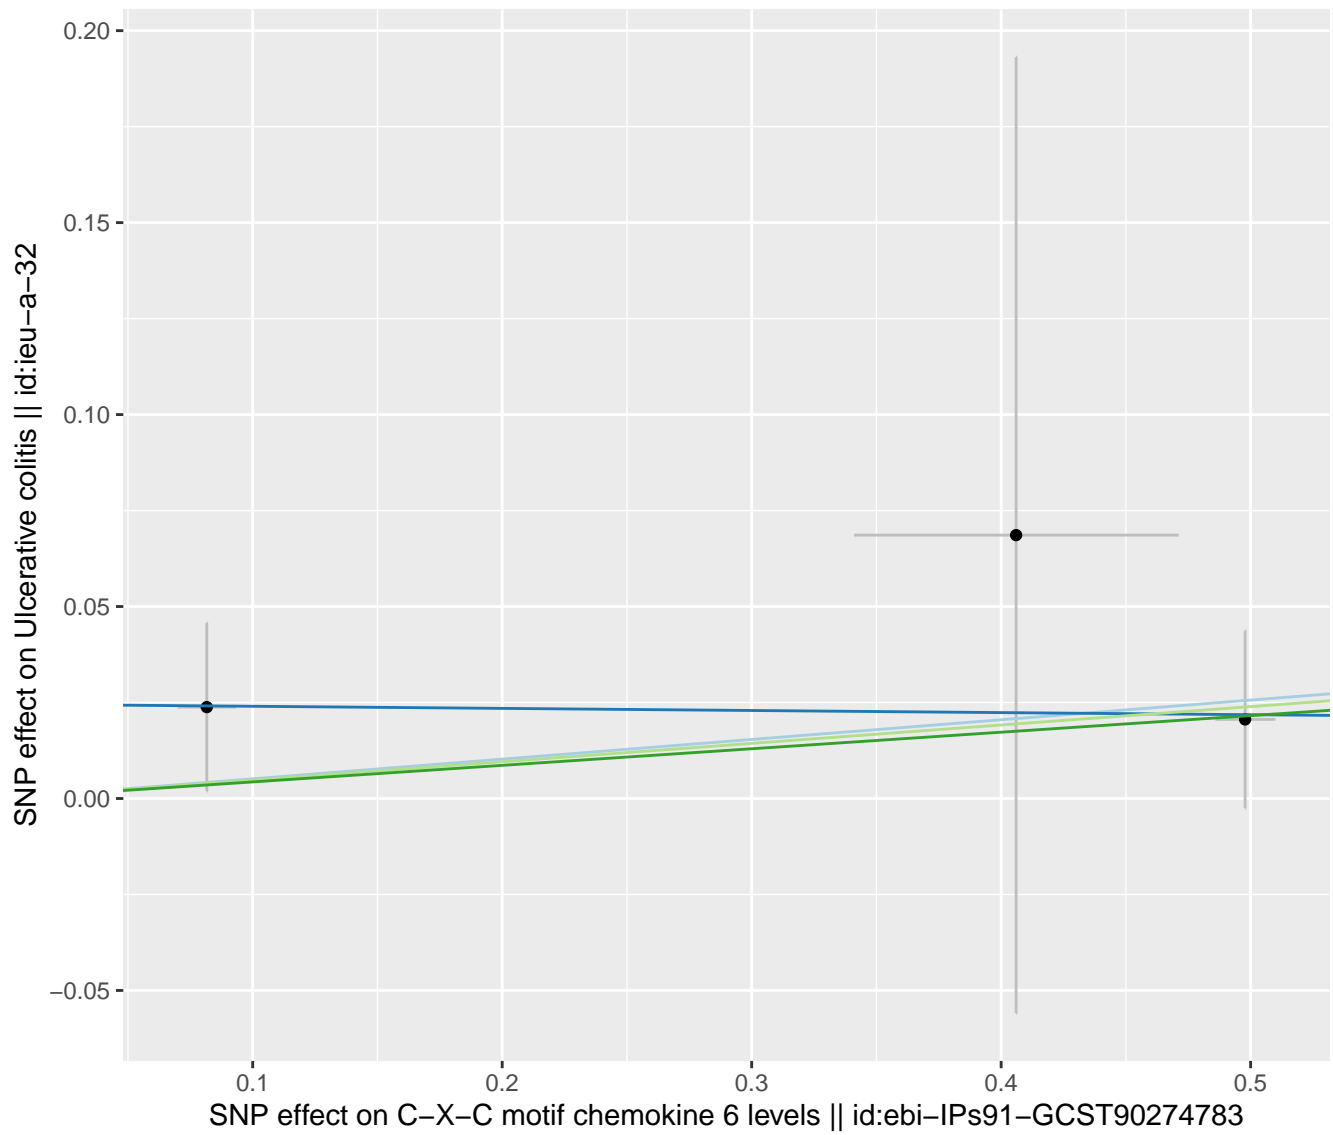



### MR Test

- Inverse variance weighted
- MR Egger
- Weighted median
- Weighted mode

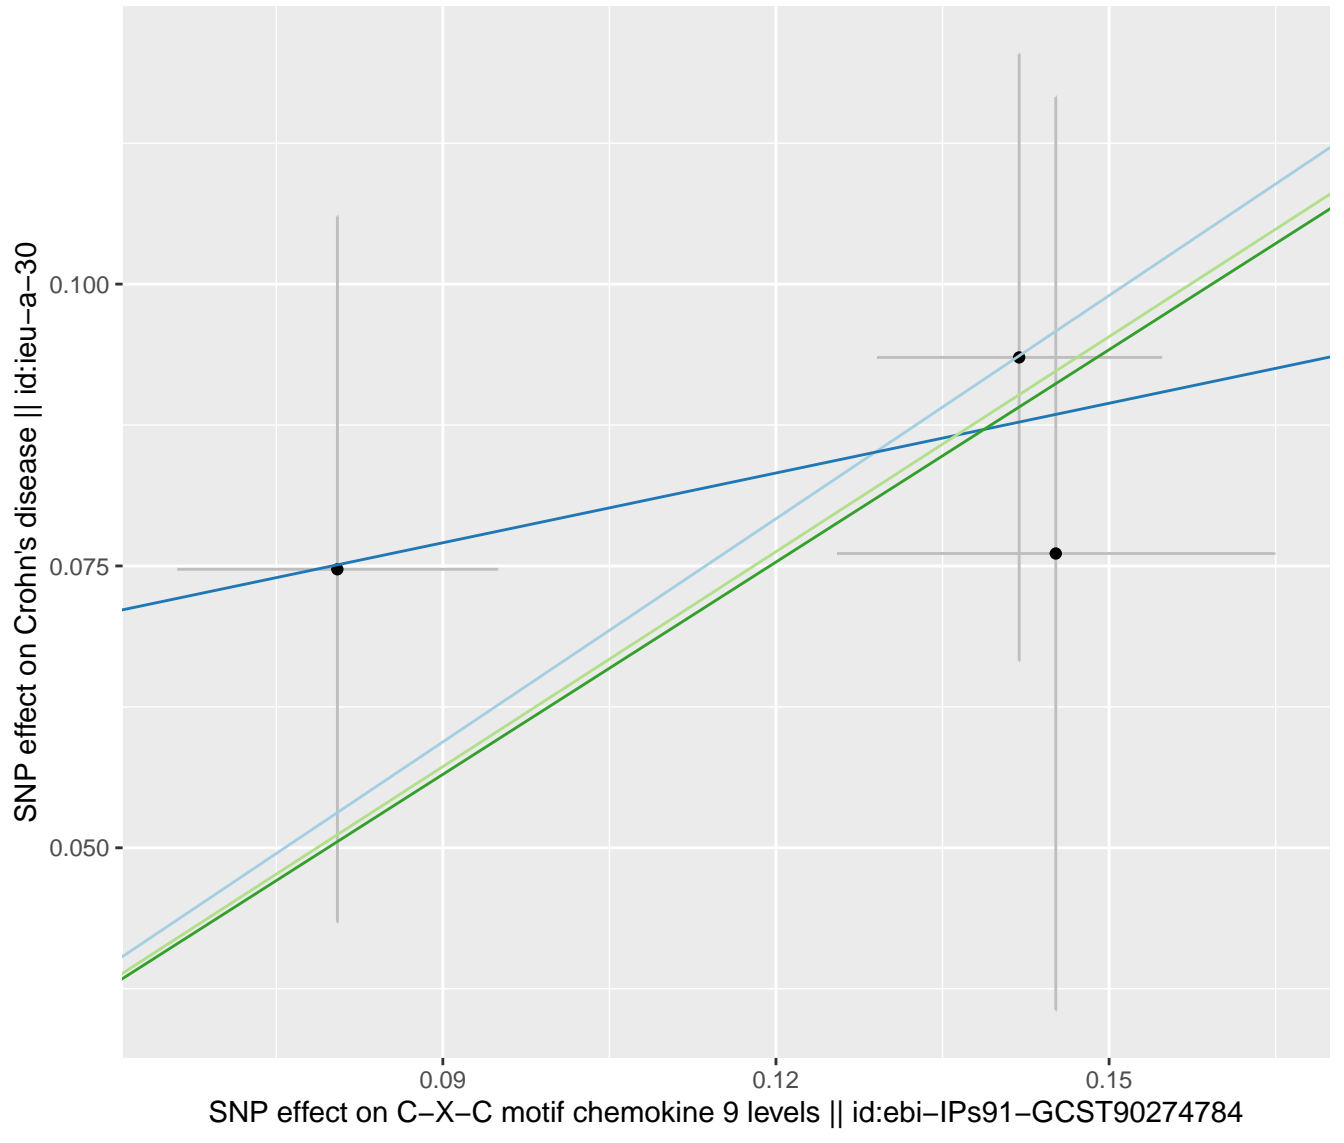

### MR Test

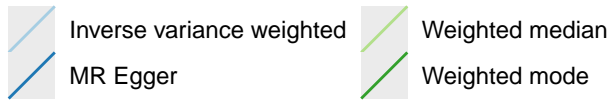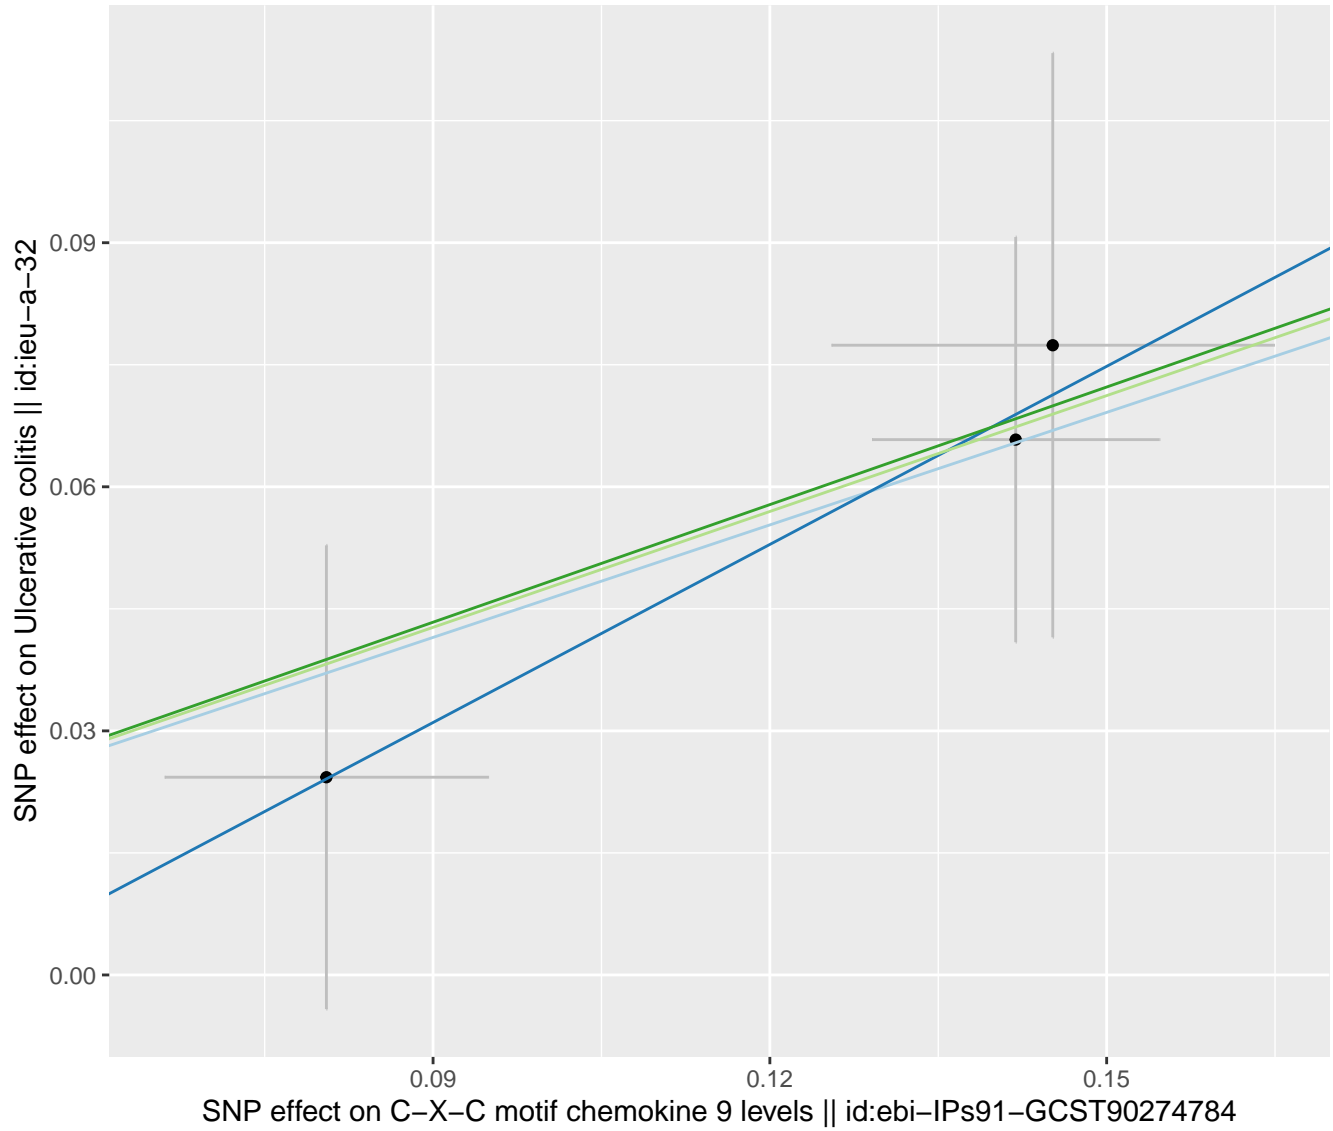

MR Test

- Inverse variance weighted
- MR Egger
- Weighted median
- Weighted mode

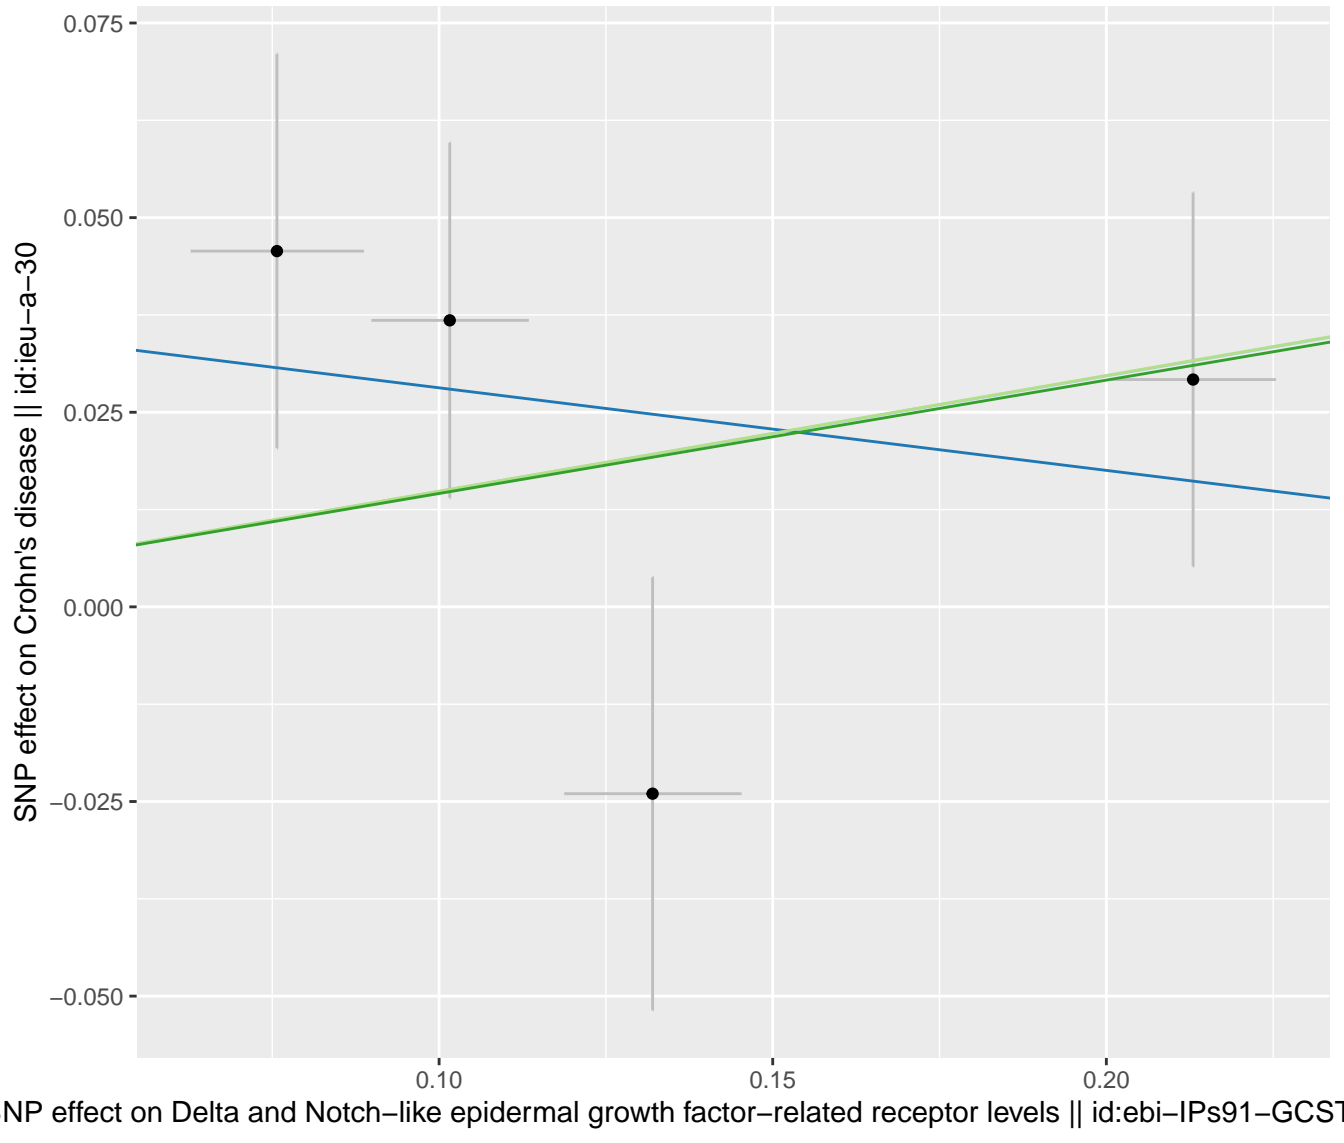

### MR Test

- Inverse variance weighted
- MR Egger
- Weighted median
- Weighted mode

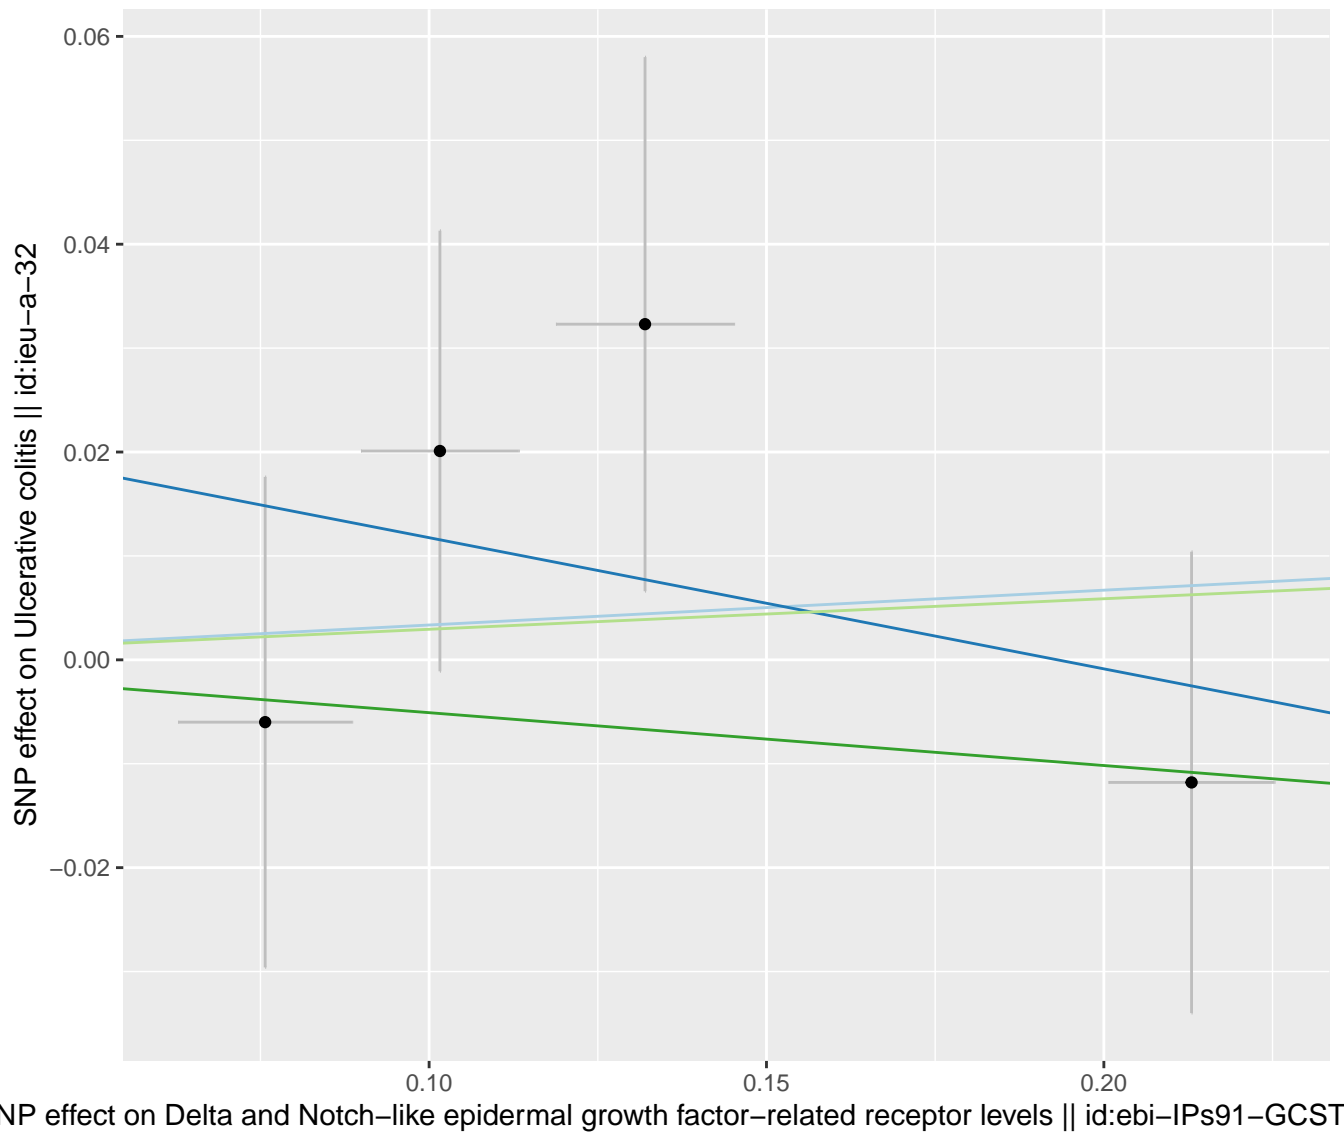

### MR Test

Inverse variance weighted

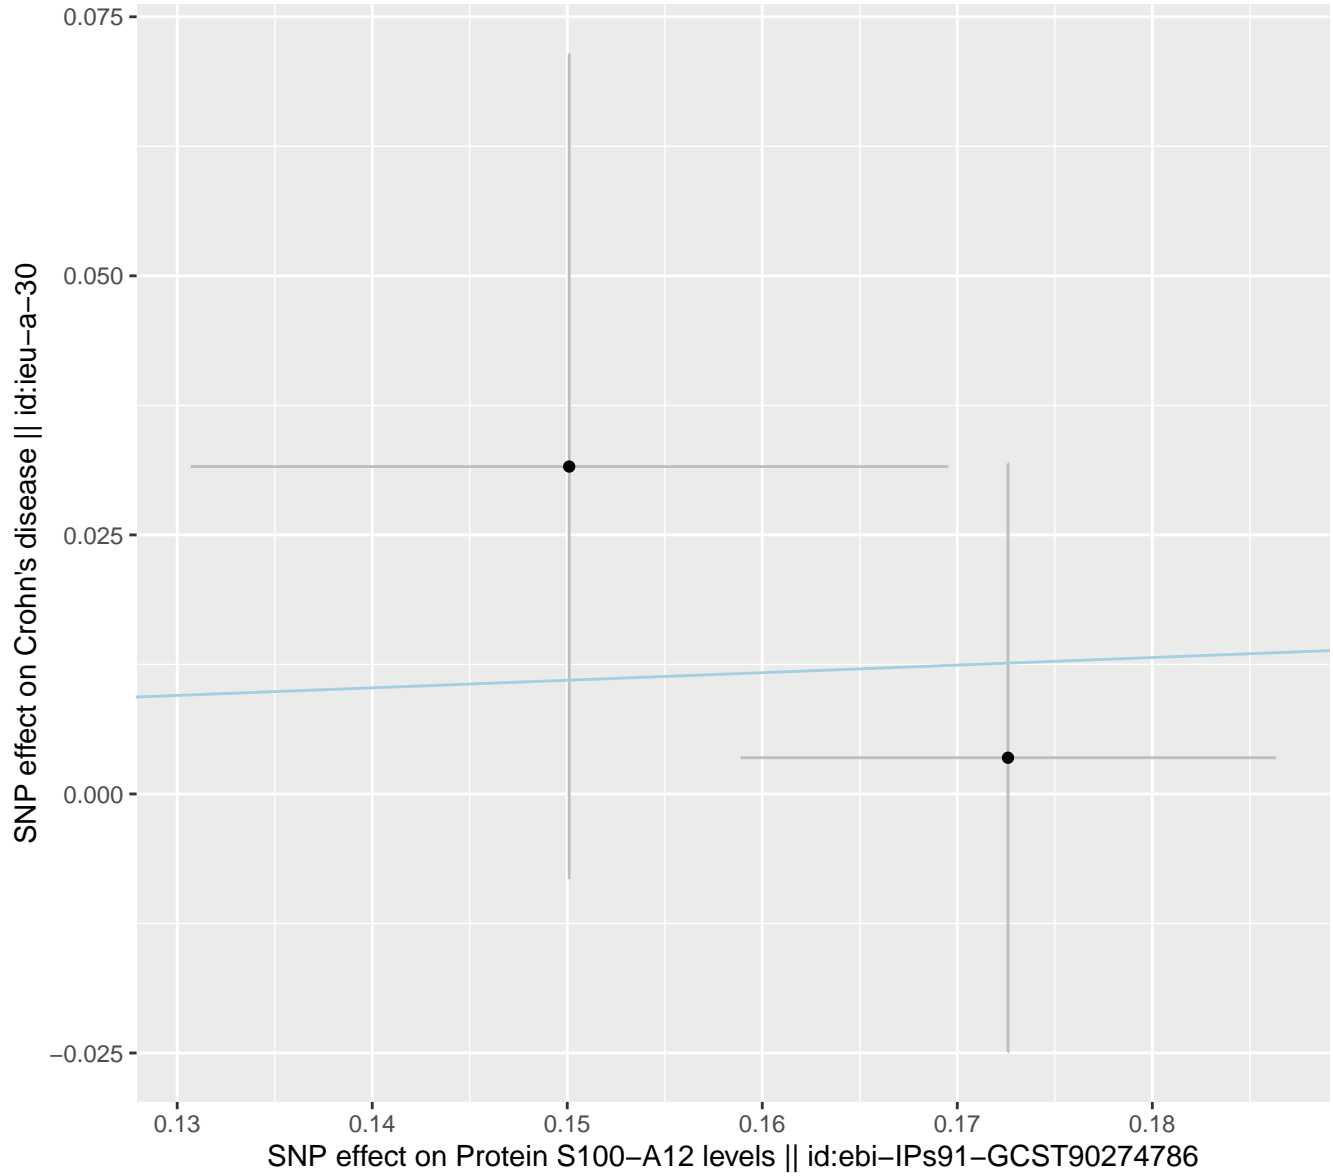

### MR Test

Inverse variance weighted

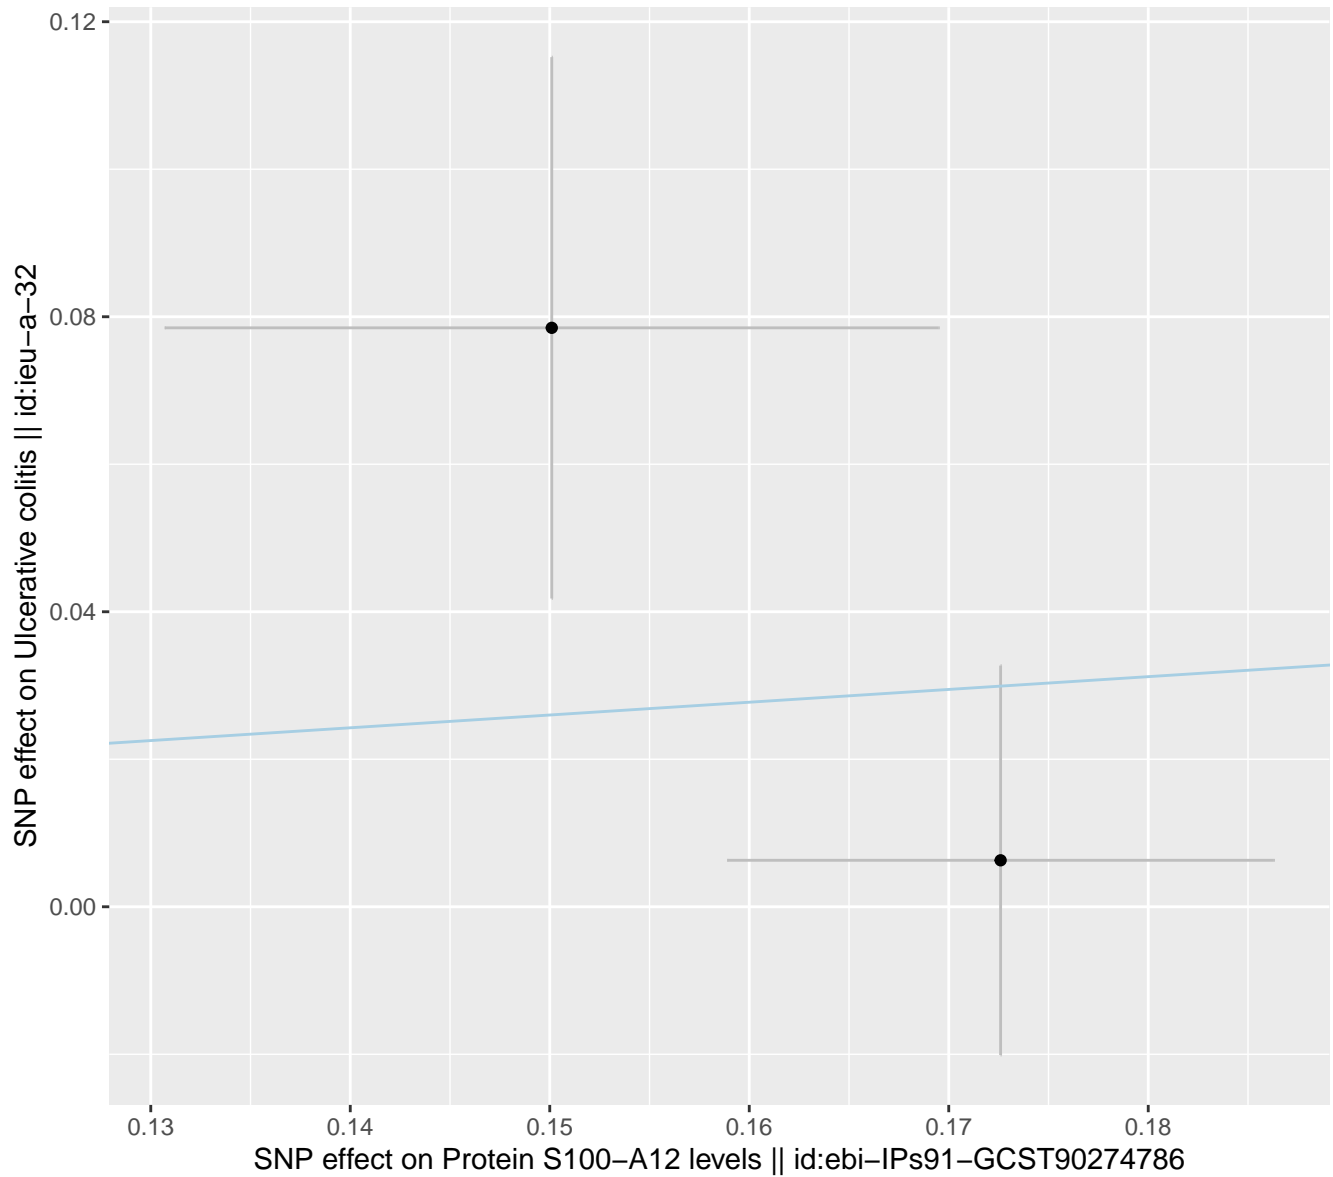

### MR Test

Inverse variance weighted

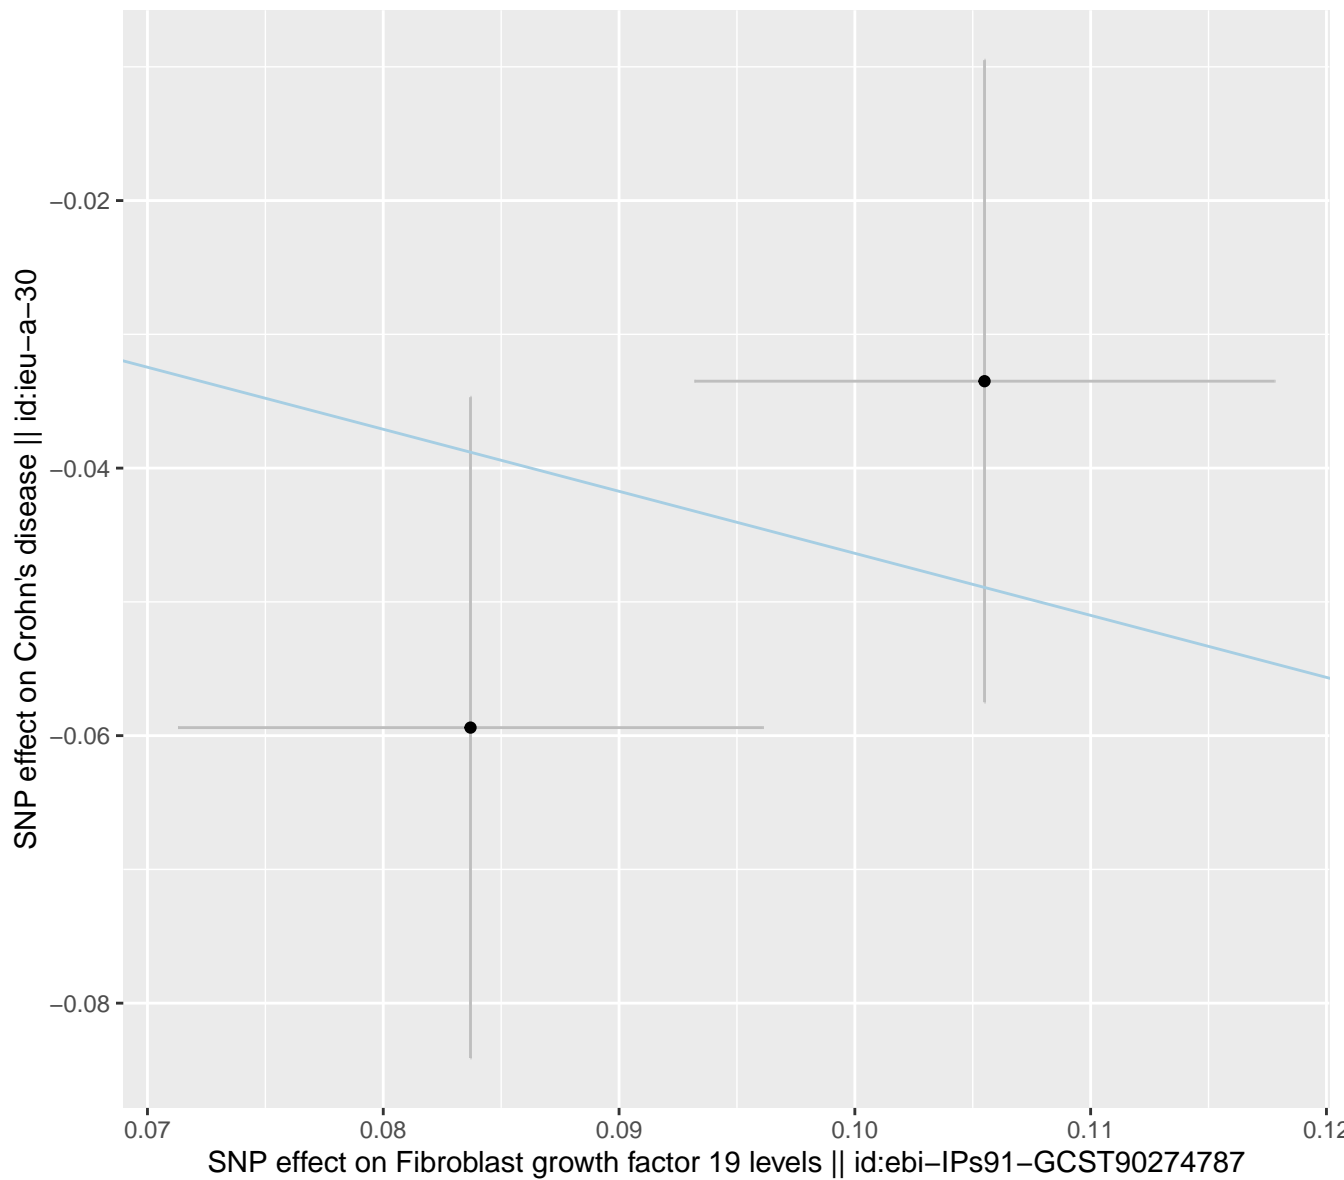

# MR Test

Inverse variance weighted

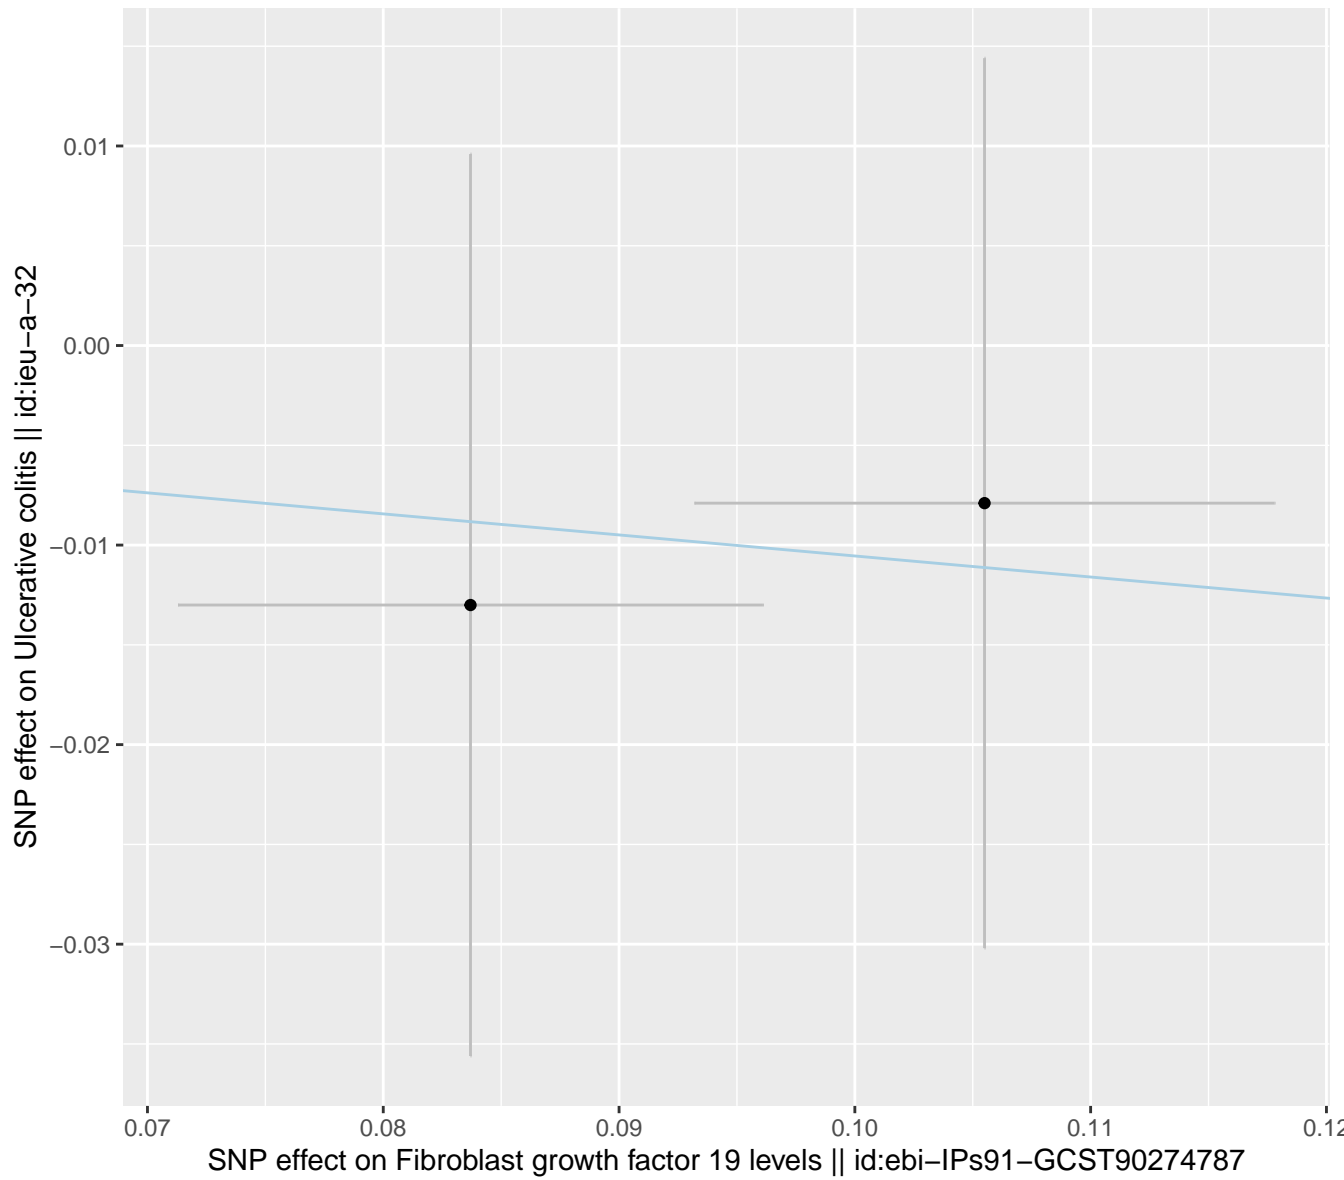



### MR Test

- Inverse variance weighted
- MR Egger
- Weighted median
- Weighted mode

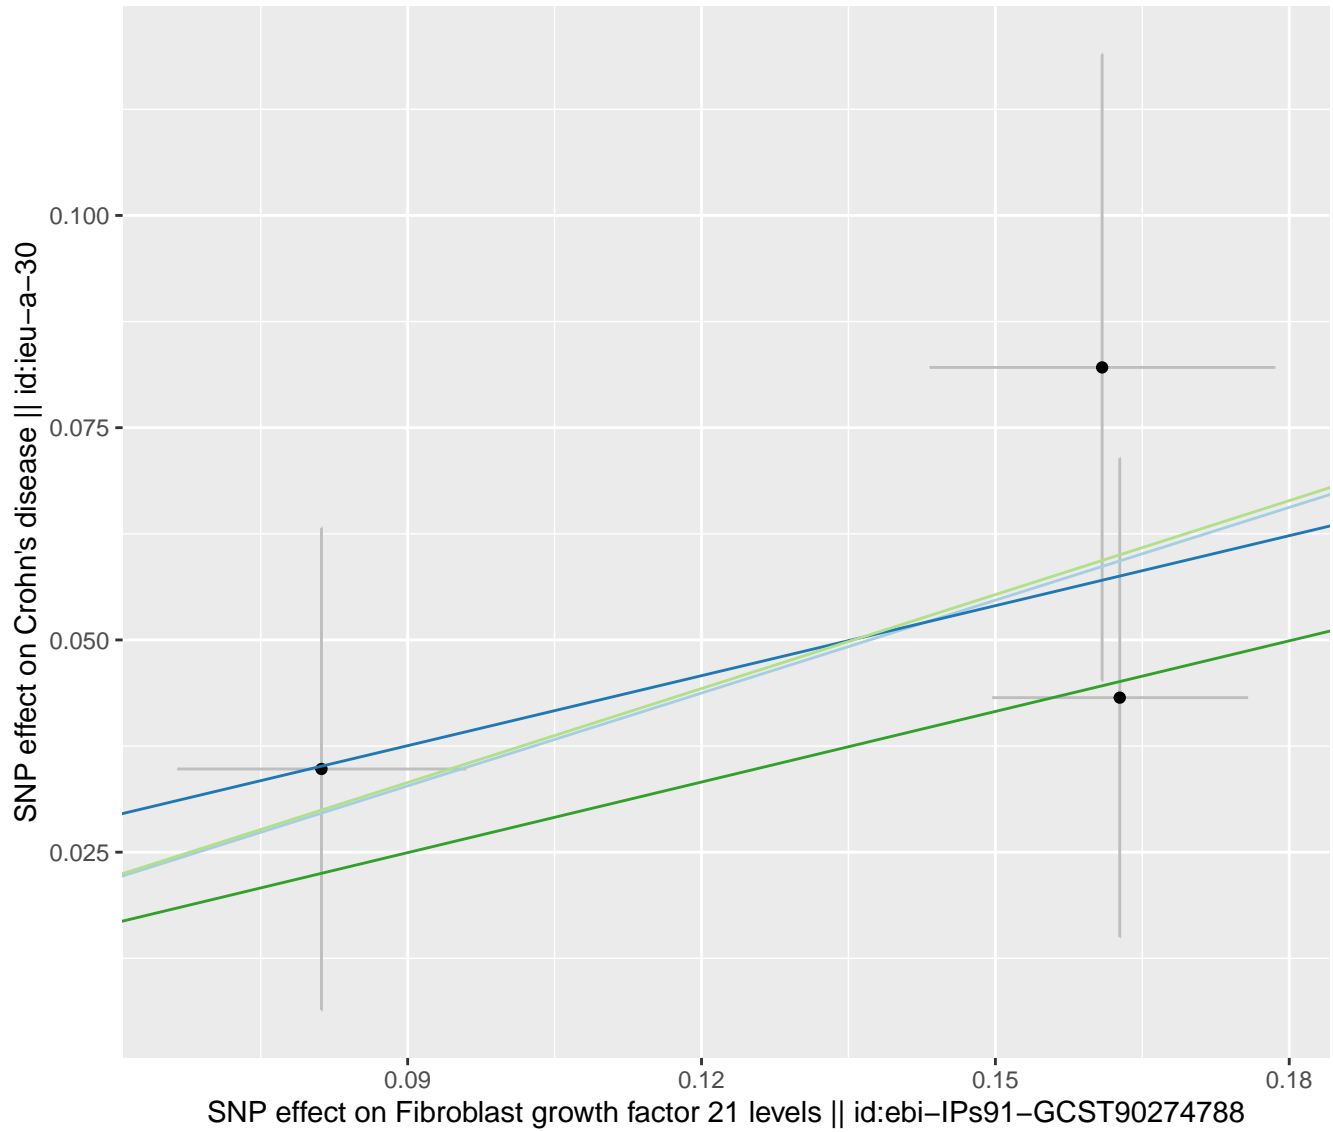

MR Test

- Inverse variance weighted
- MR Egger
- Weighted median
- Weighted mode

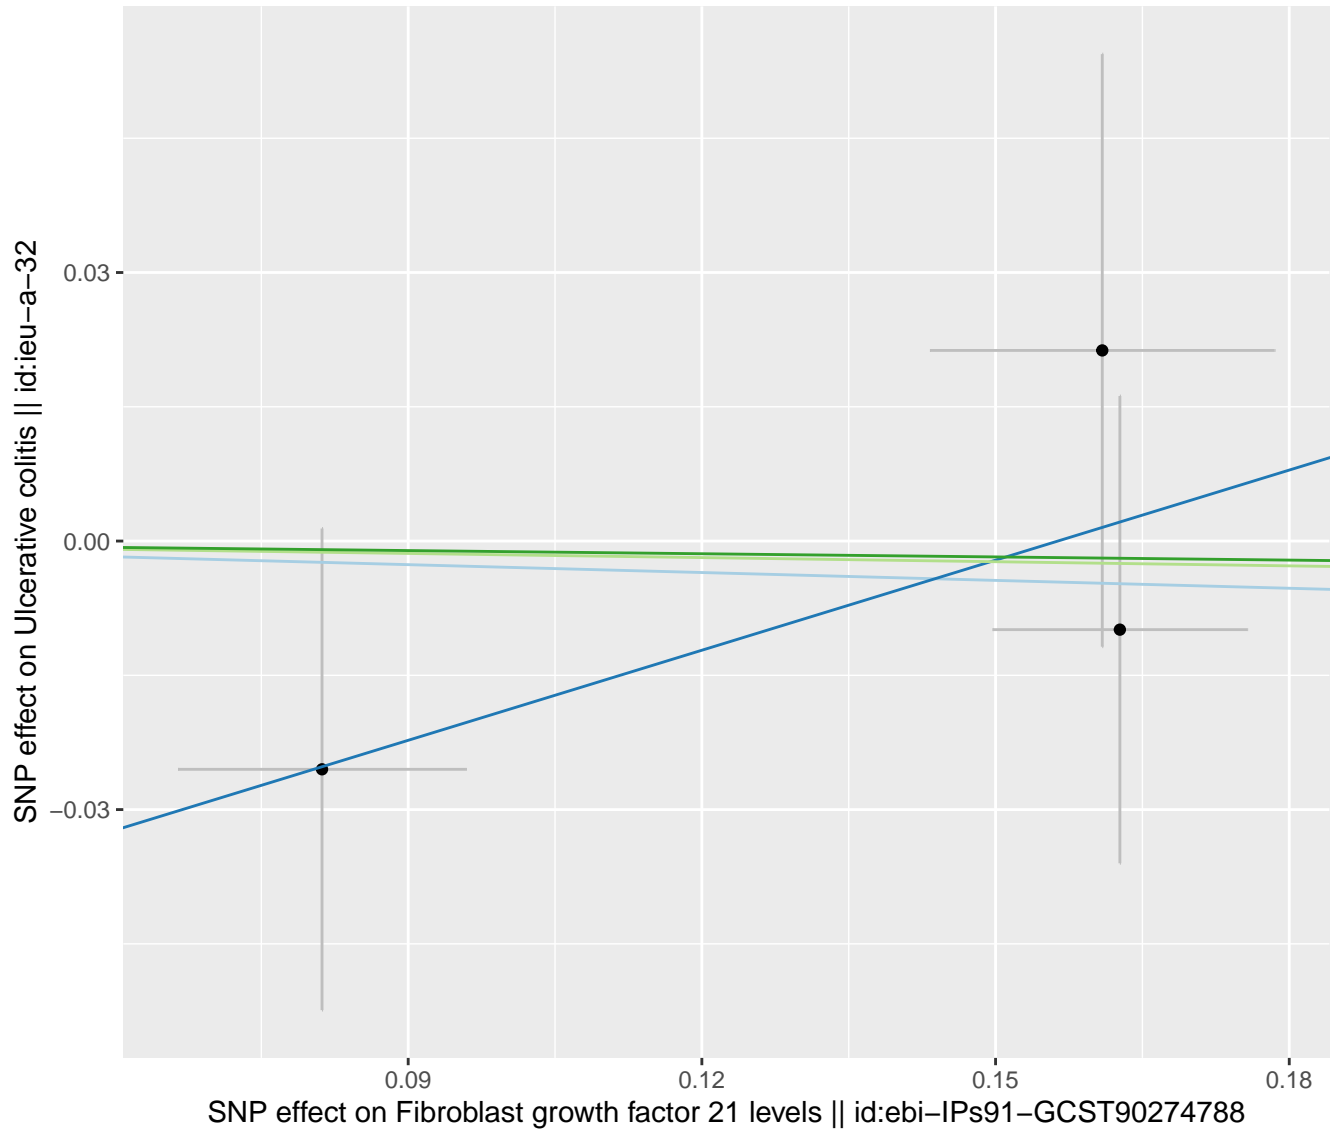

### MR Test

Inverse variance weighted

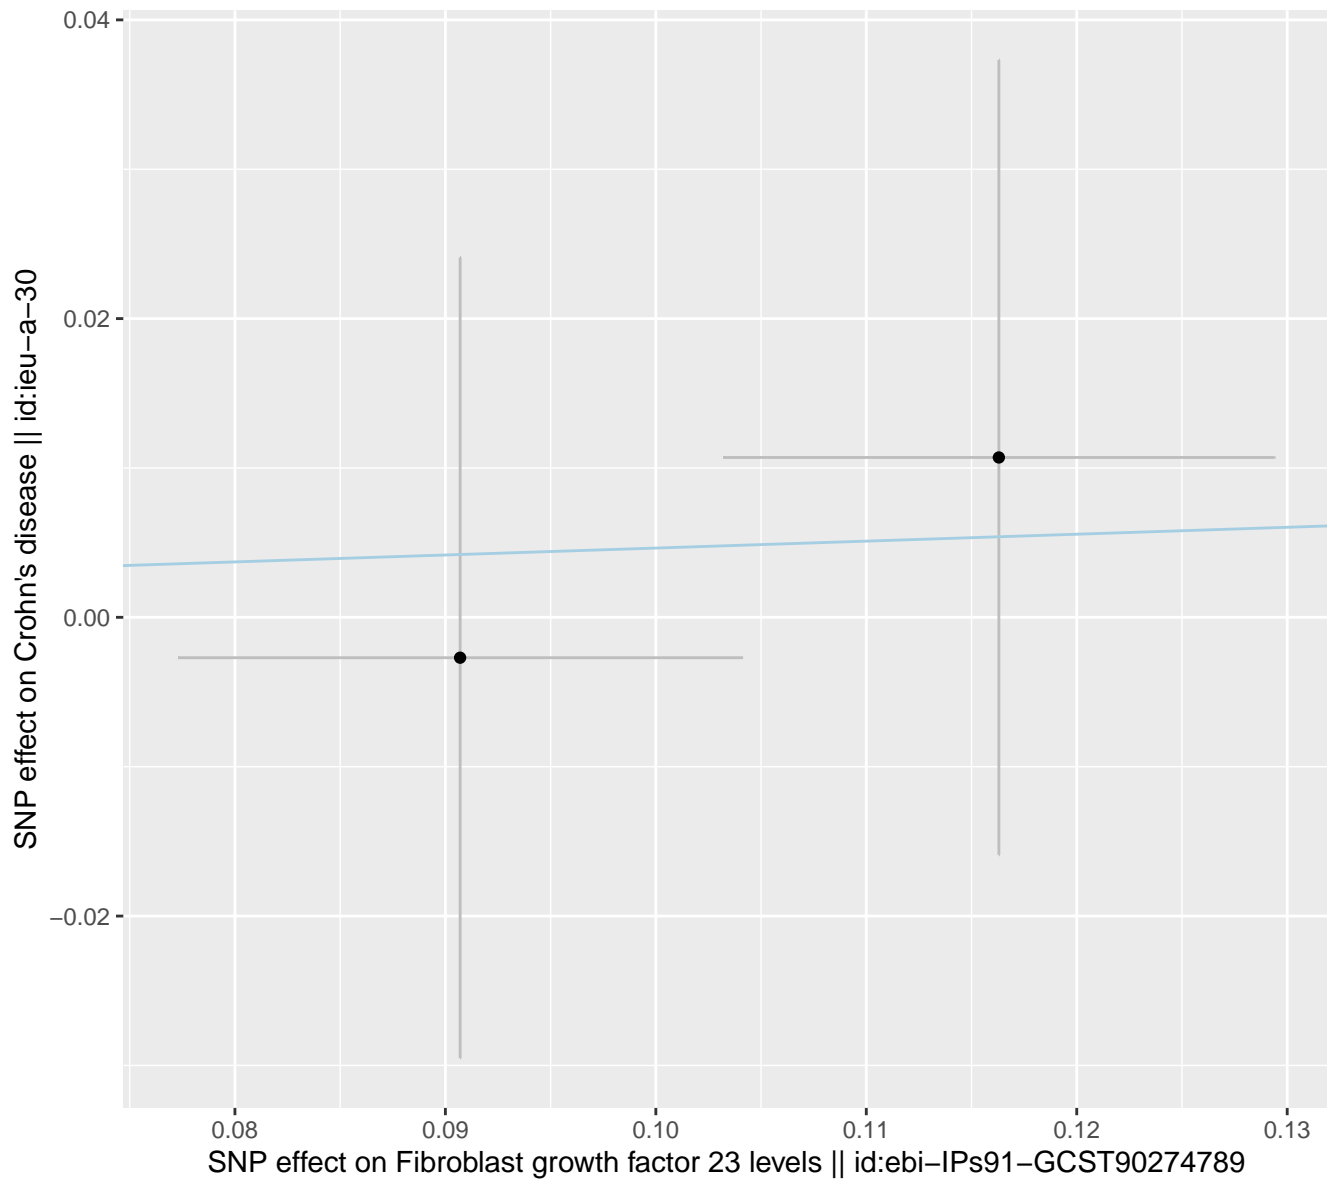

MR Test

Inverse variance weighted

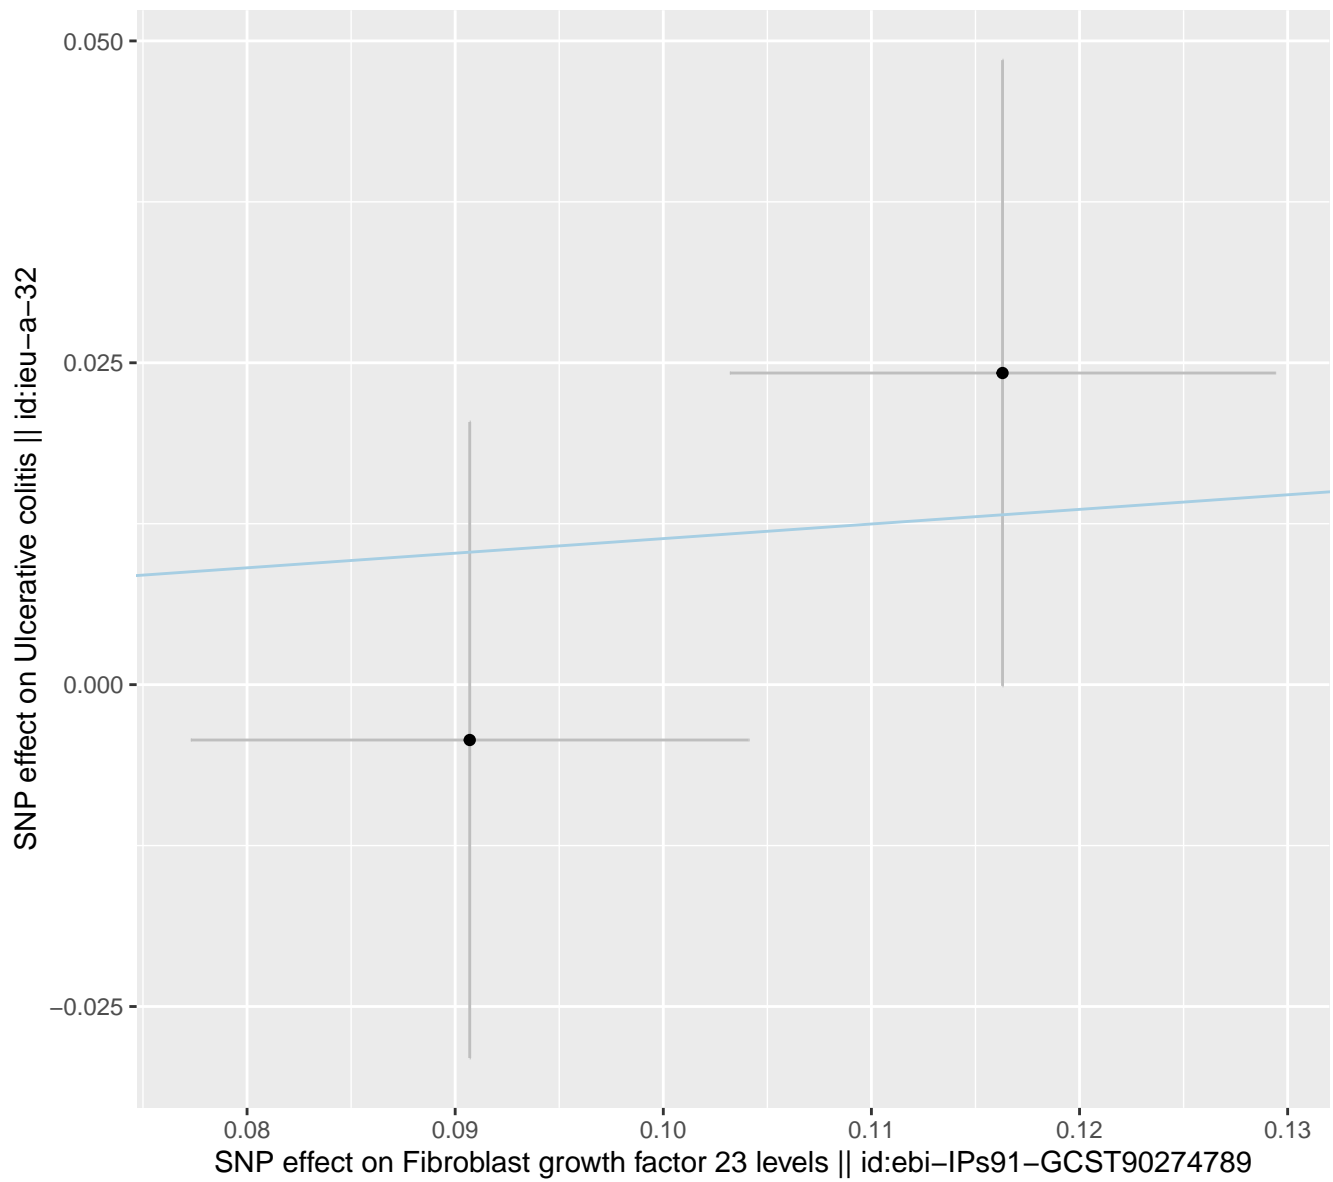

# MR Test

Inverse variance weighted

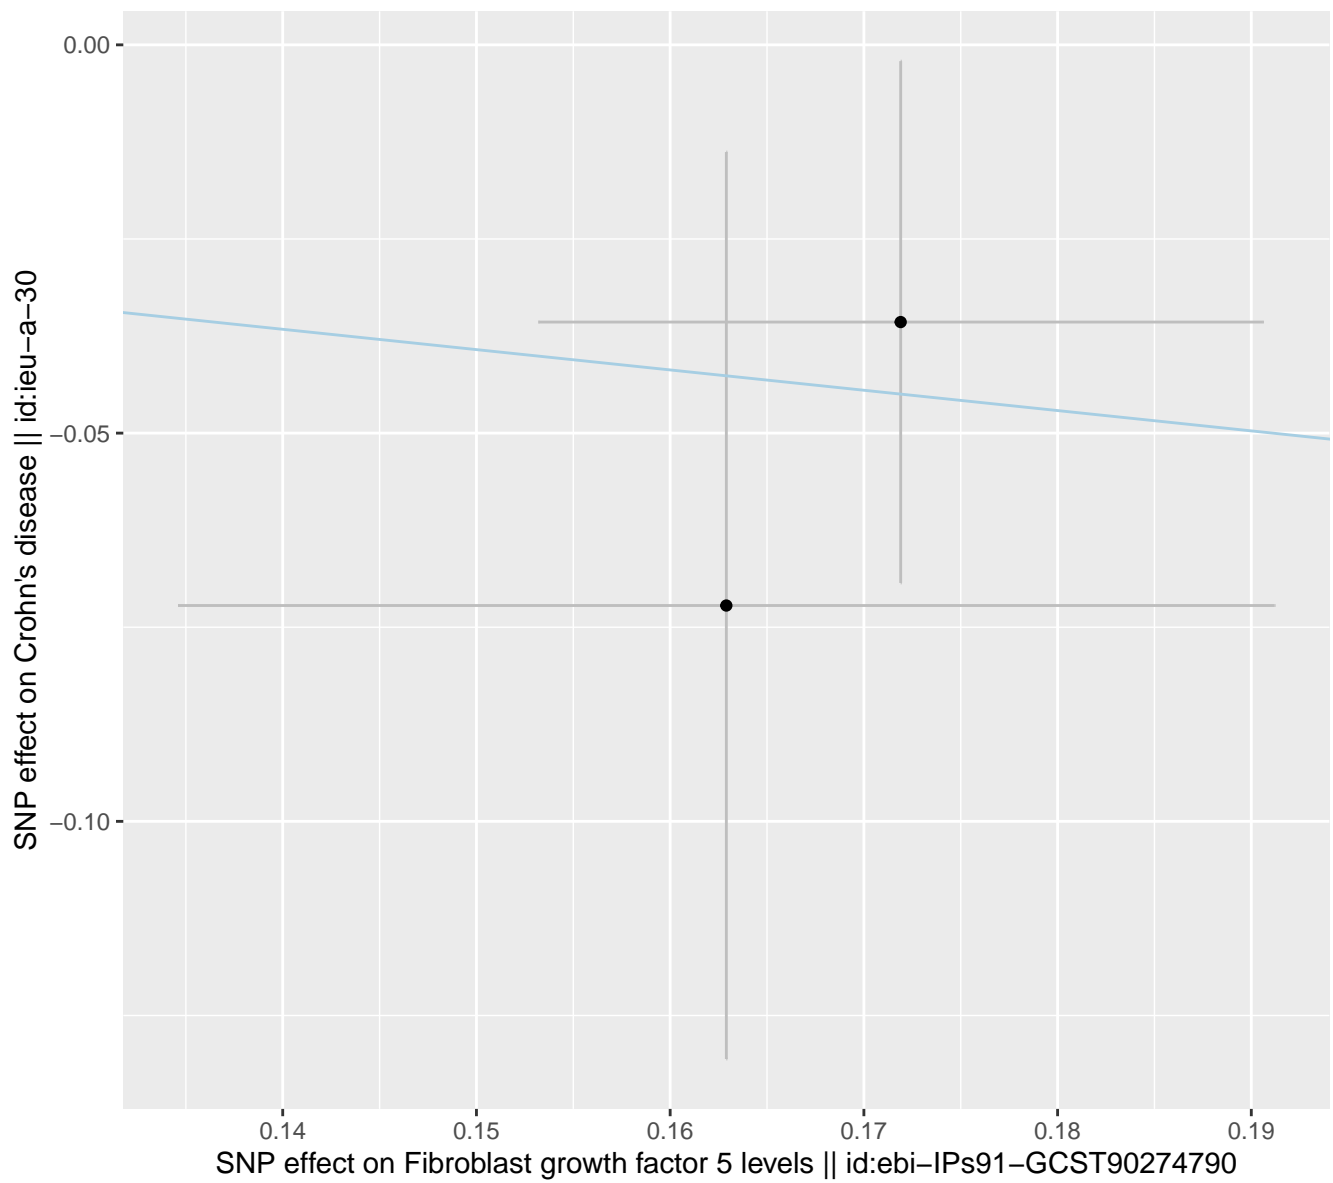

### MR Test

Inverse variance weighted

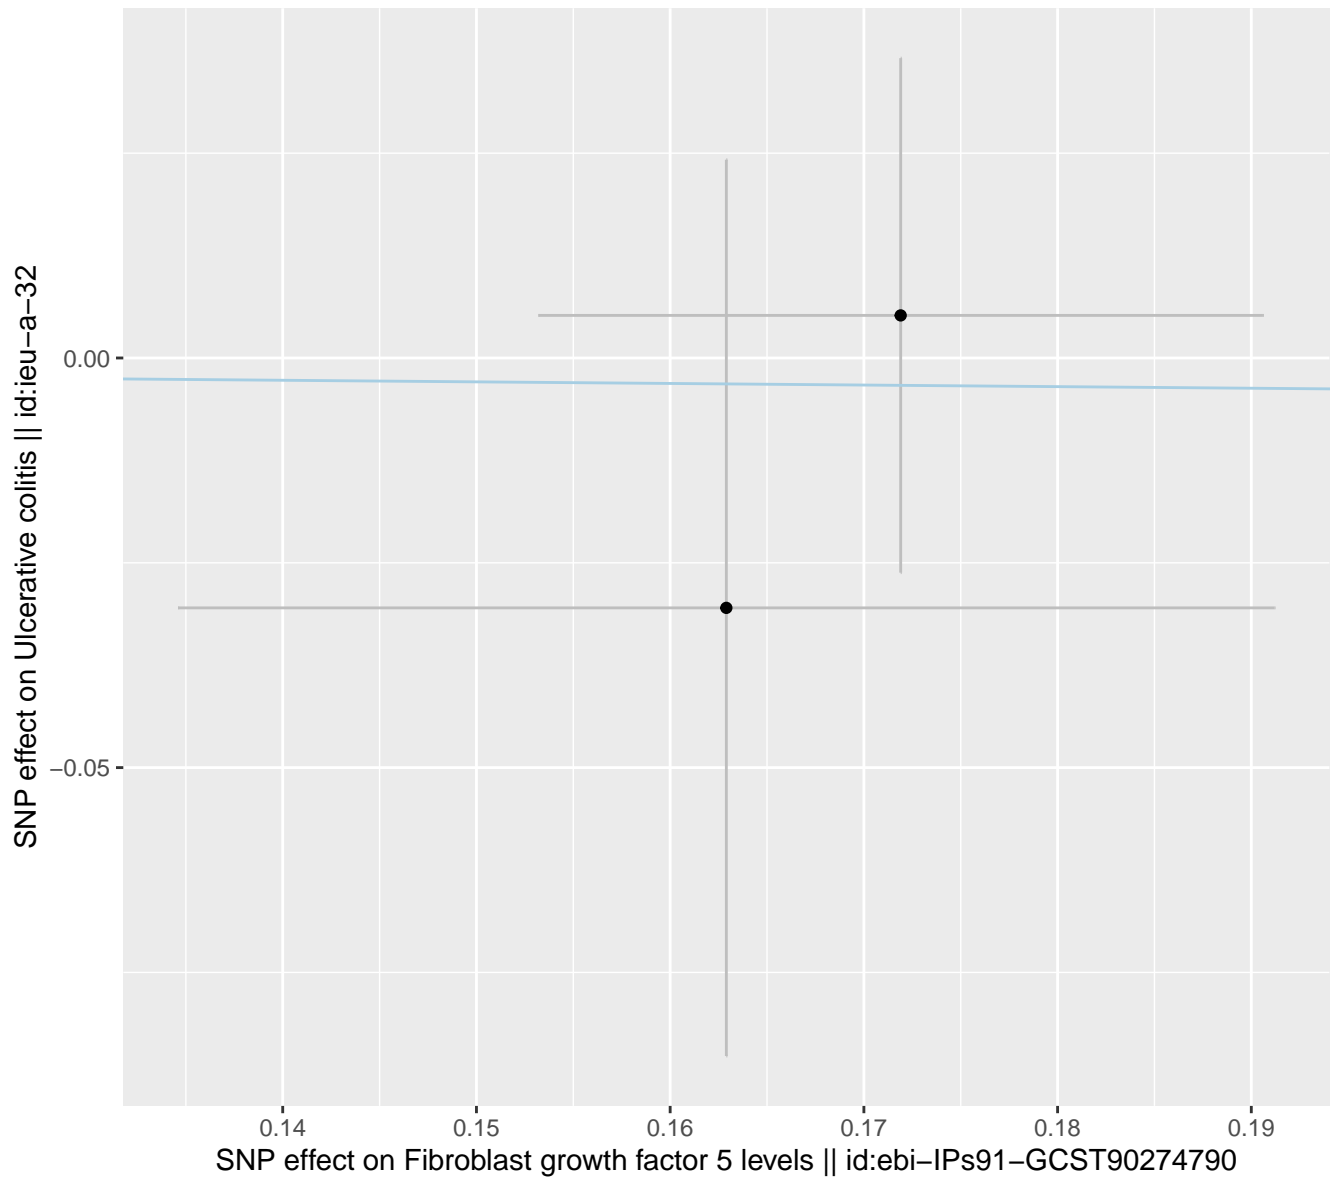

MR Test

- Inverse variance weighted
- MR Egger
- Weighted median
- Weighted mode

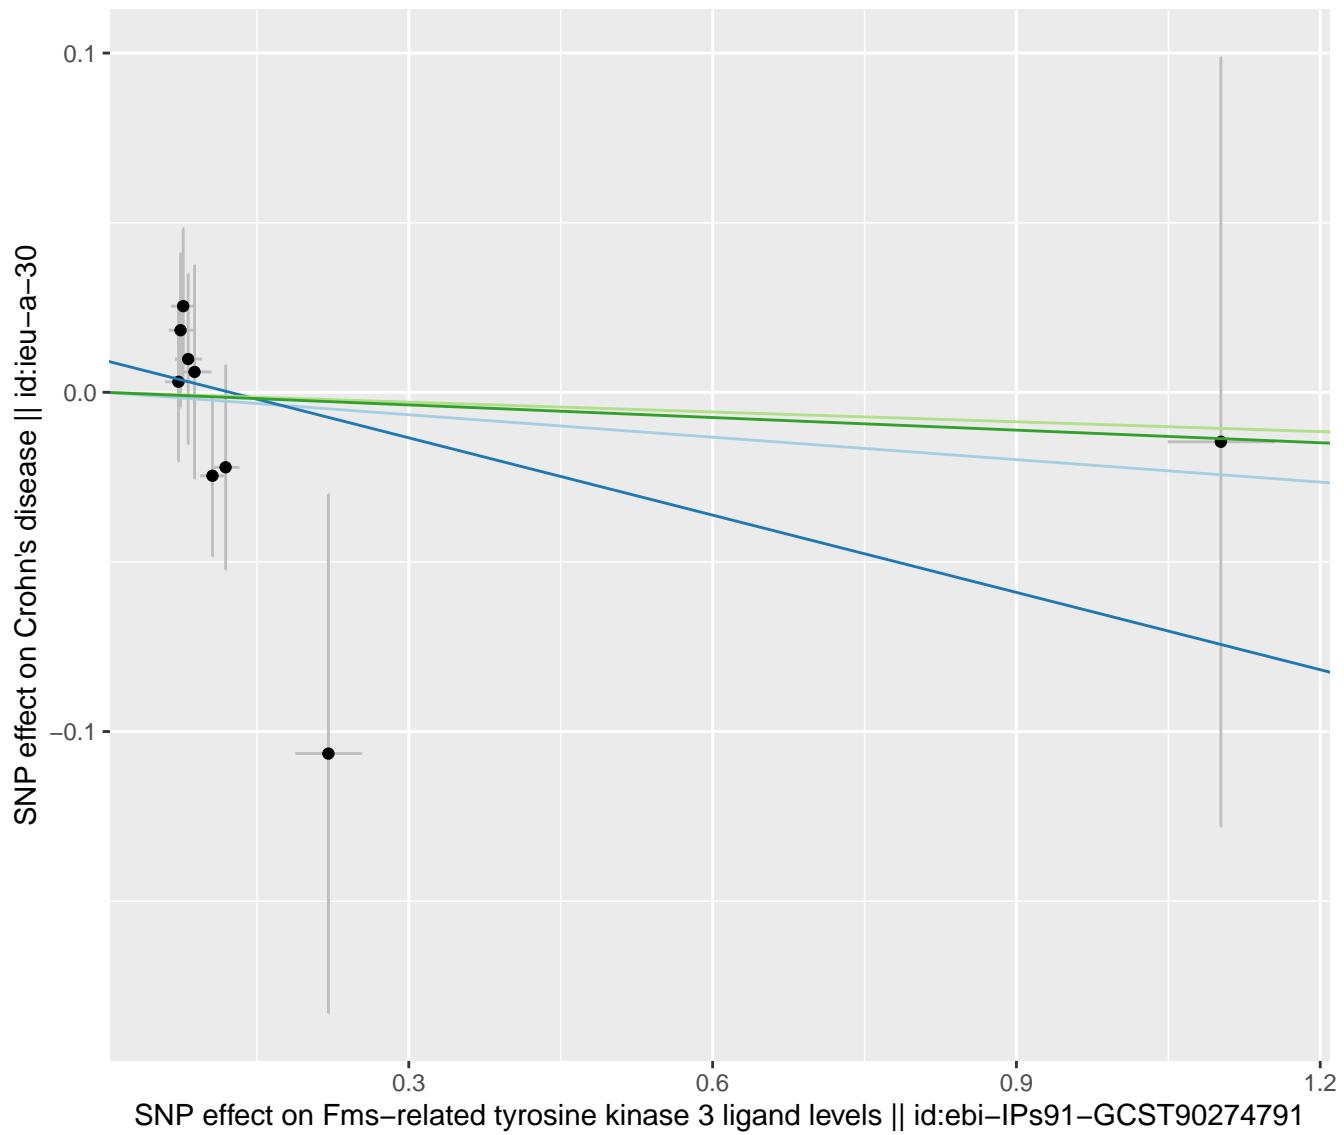

MR Test

- Inverse variance weighted
- MR Egger
- Weighted median
- Weighted mode

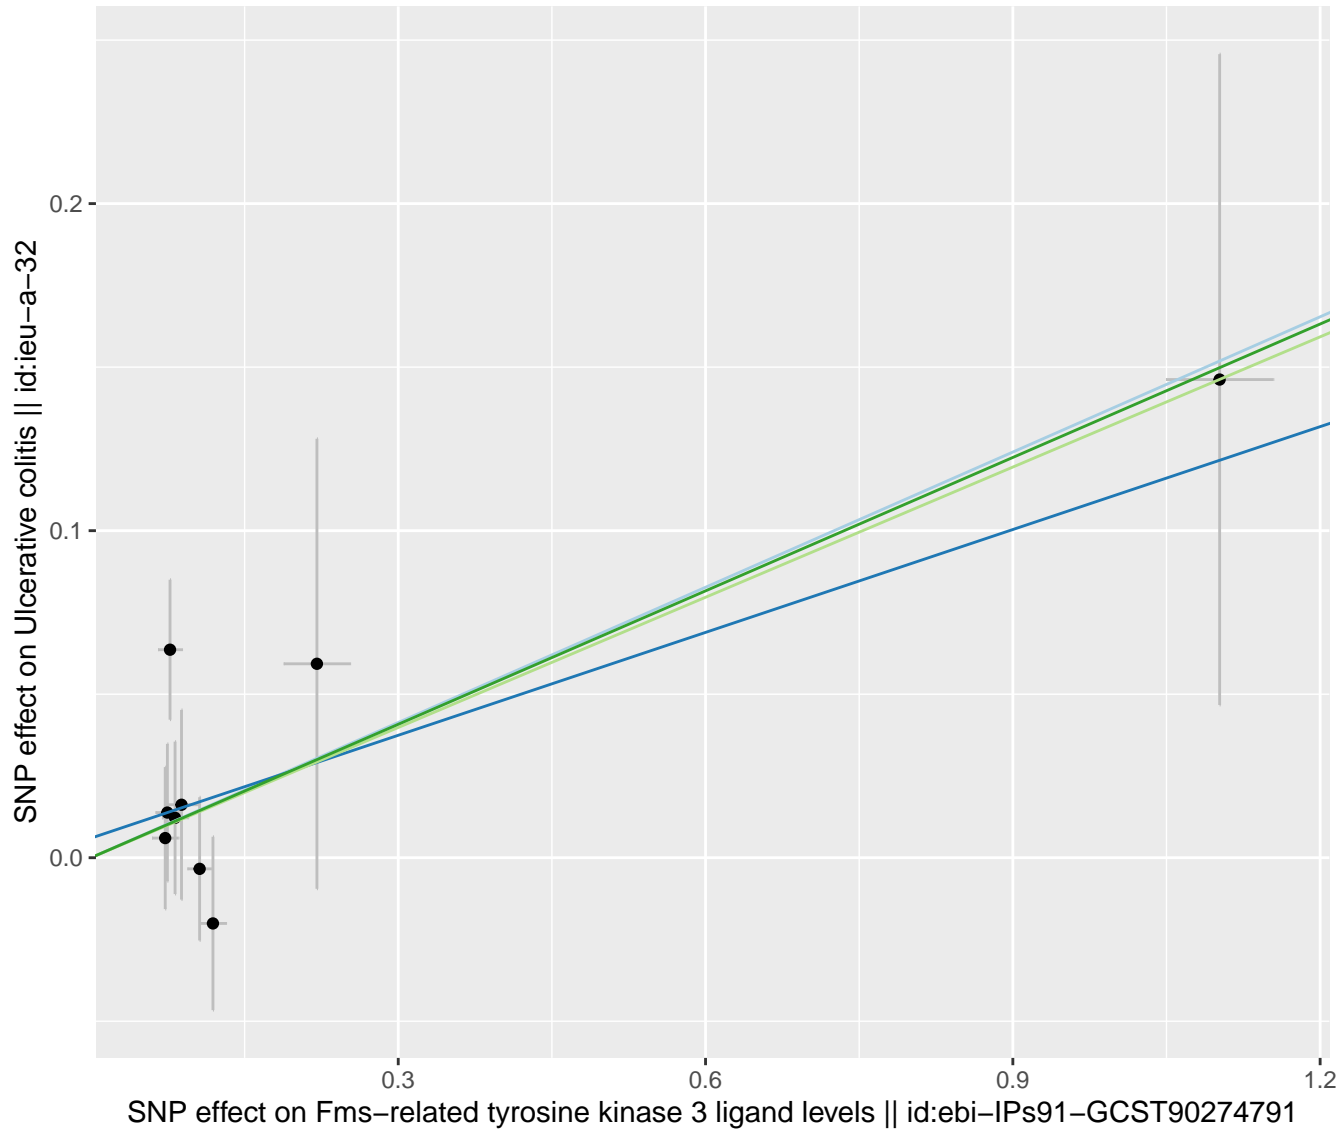



MR Test

- Inverse variance weighted
- MR Egger
- Weighted median
- Weighted mode

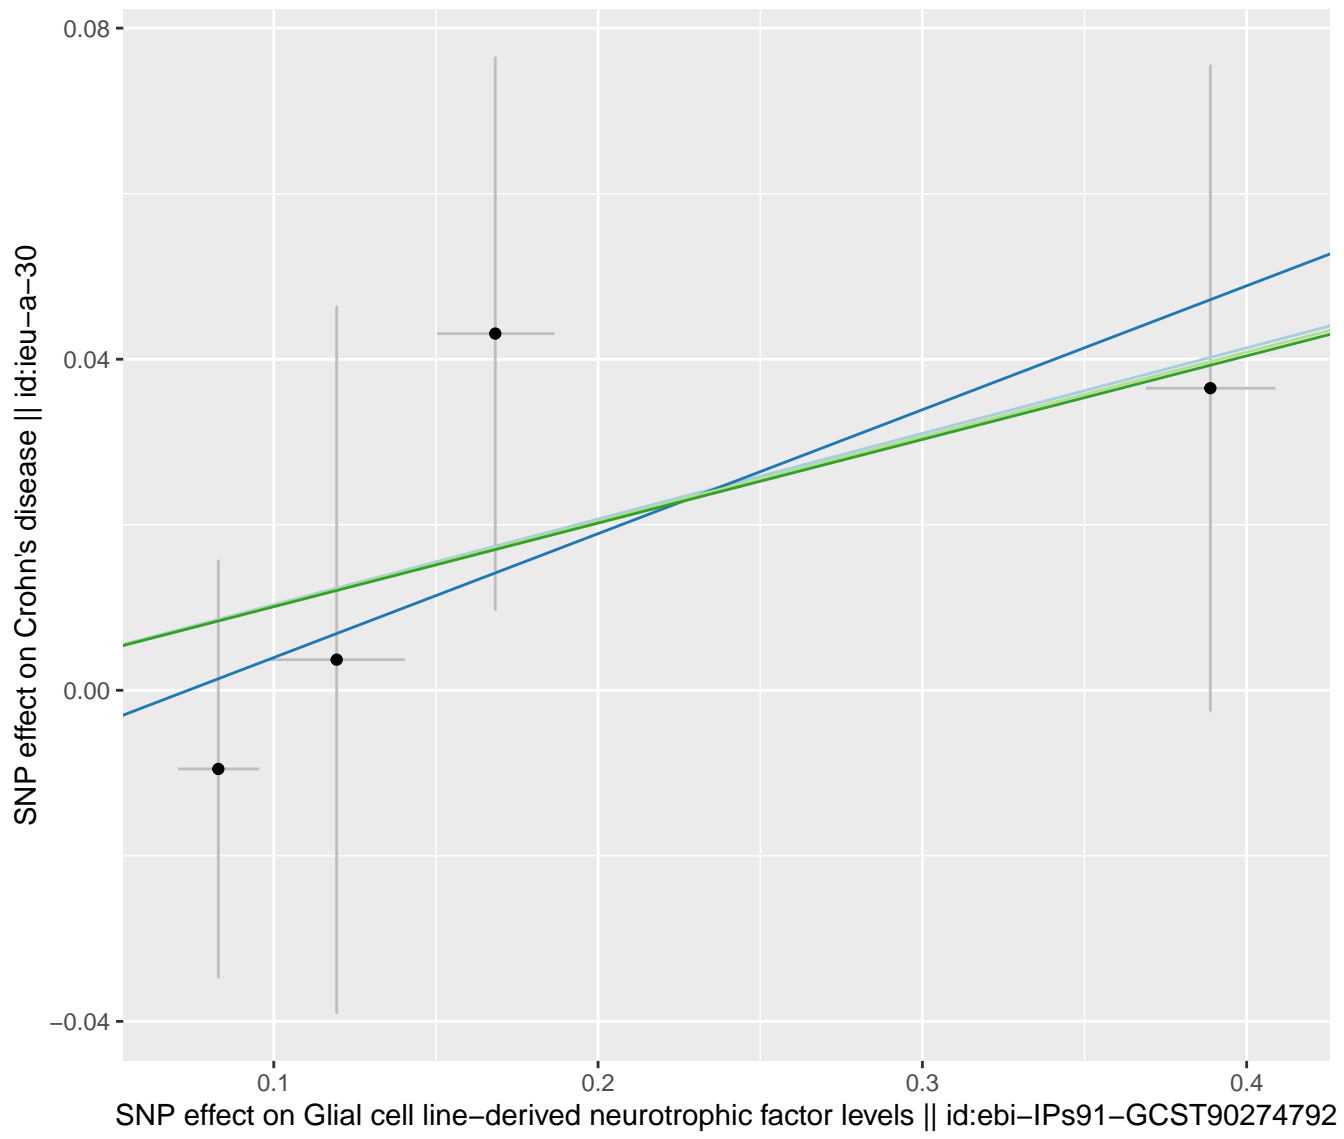

### MR Test

- Inverse variance weighted
- MR Egger
- Weighted median
- Weighted mode

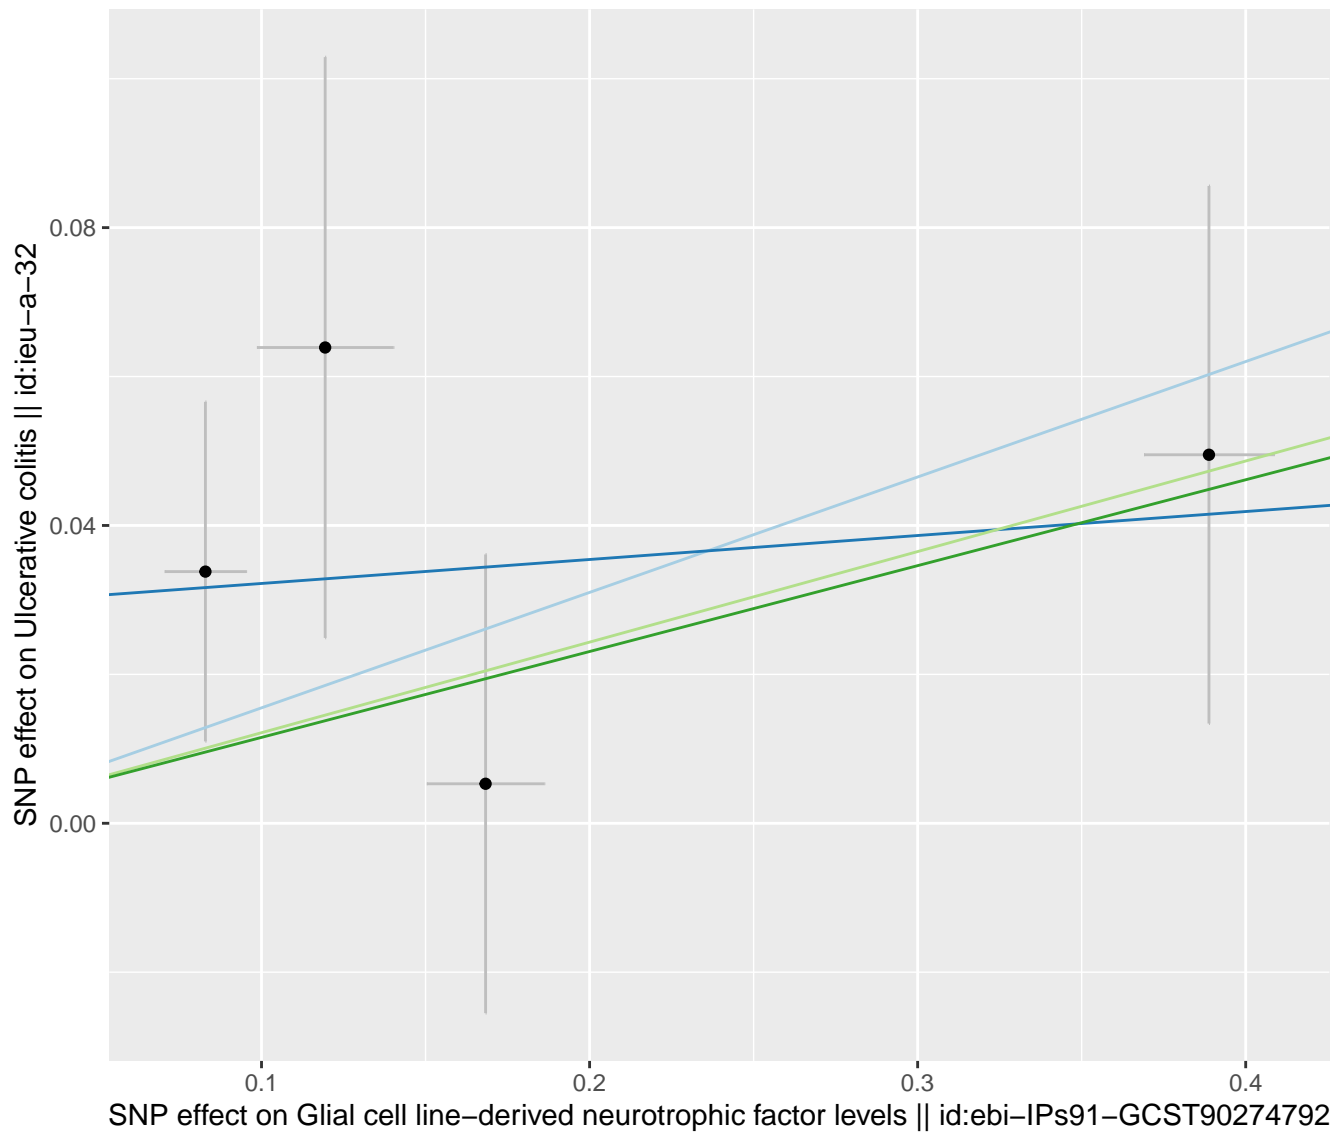

# MR Test

Inverse variance weighted

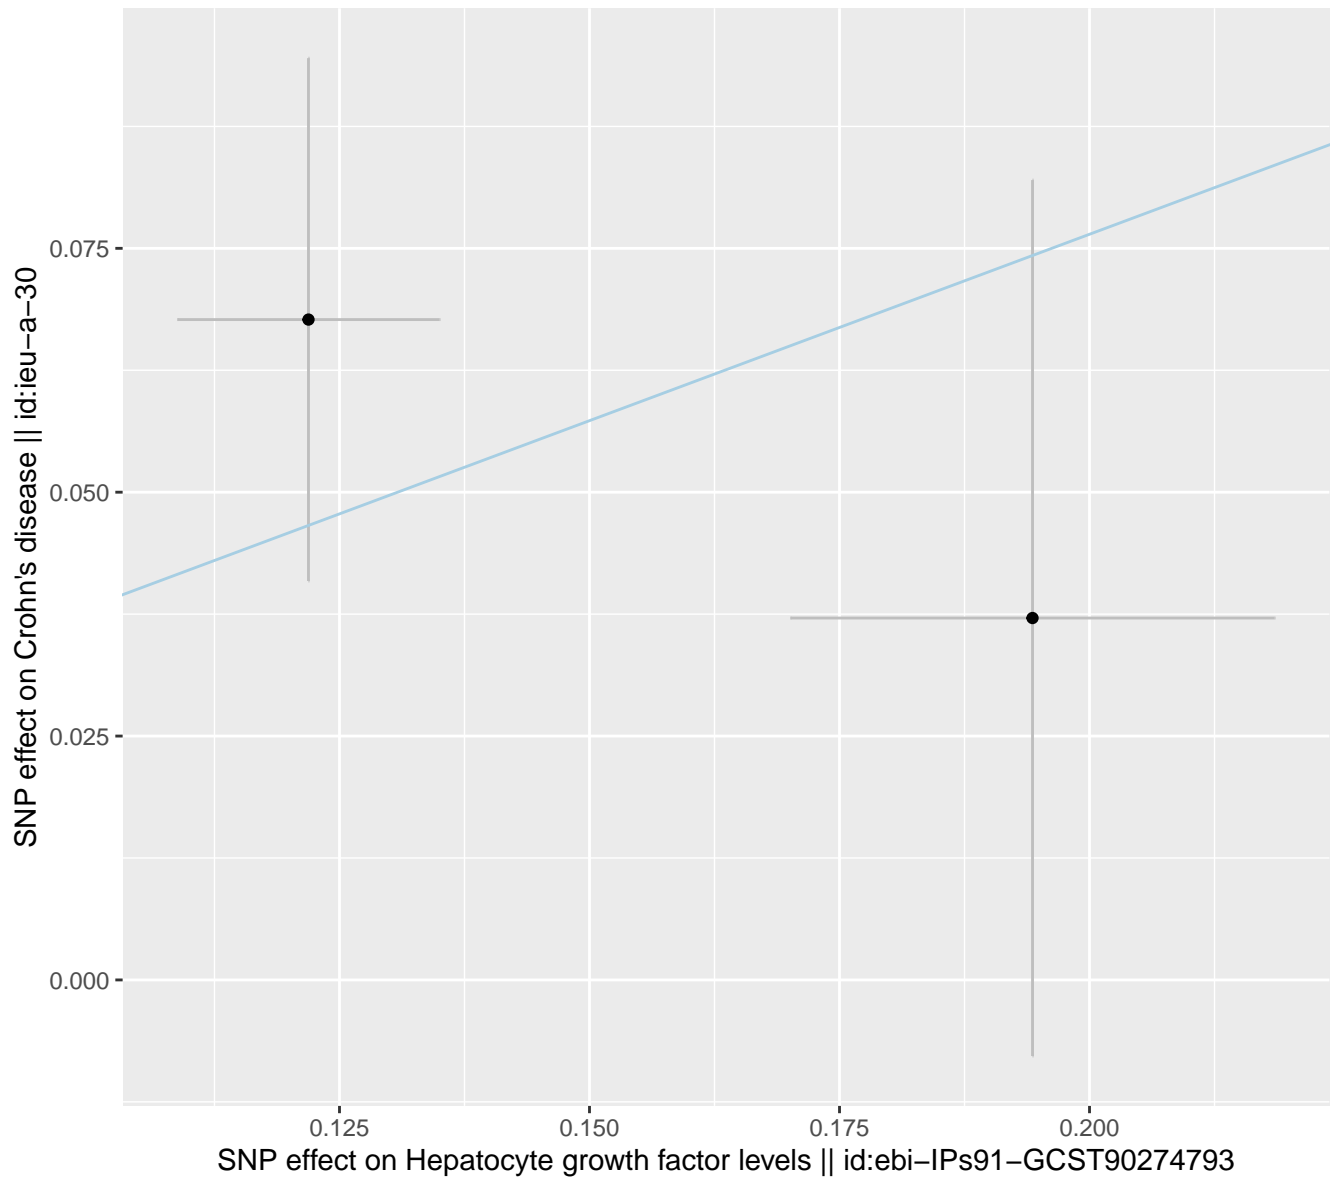

# MR Test

Inverse variance weighted

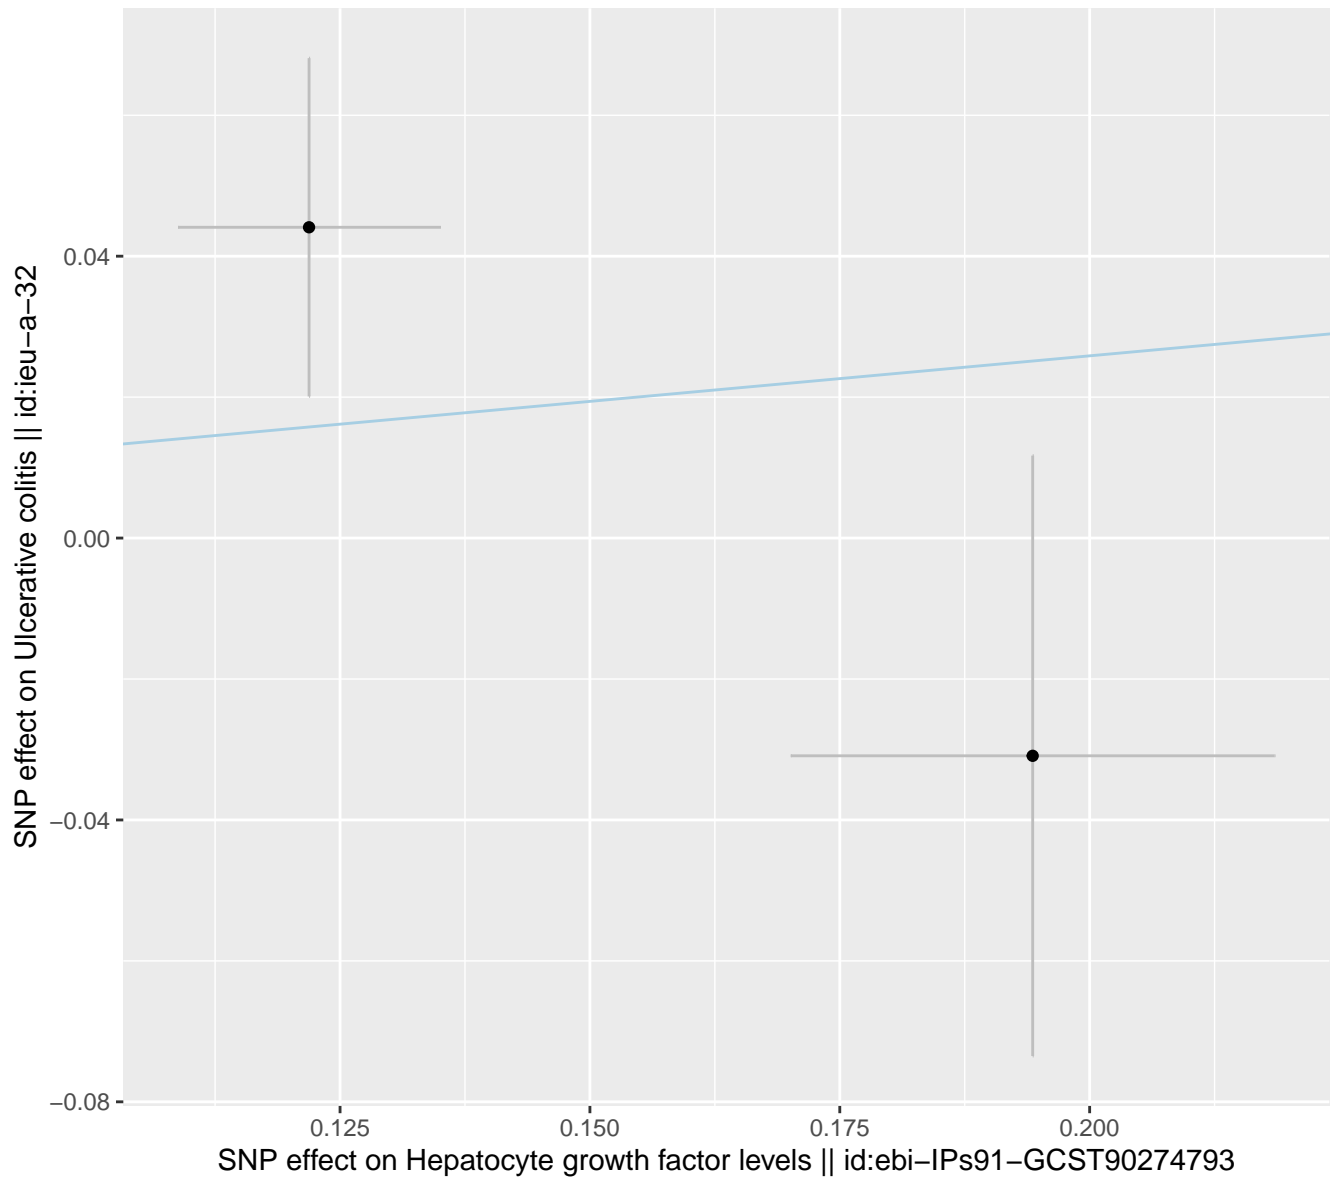

### MR Test

Inverse variance weighted

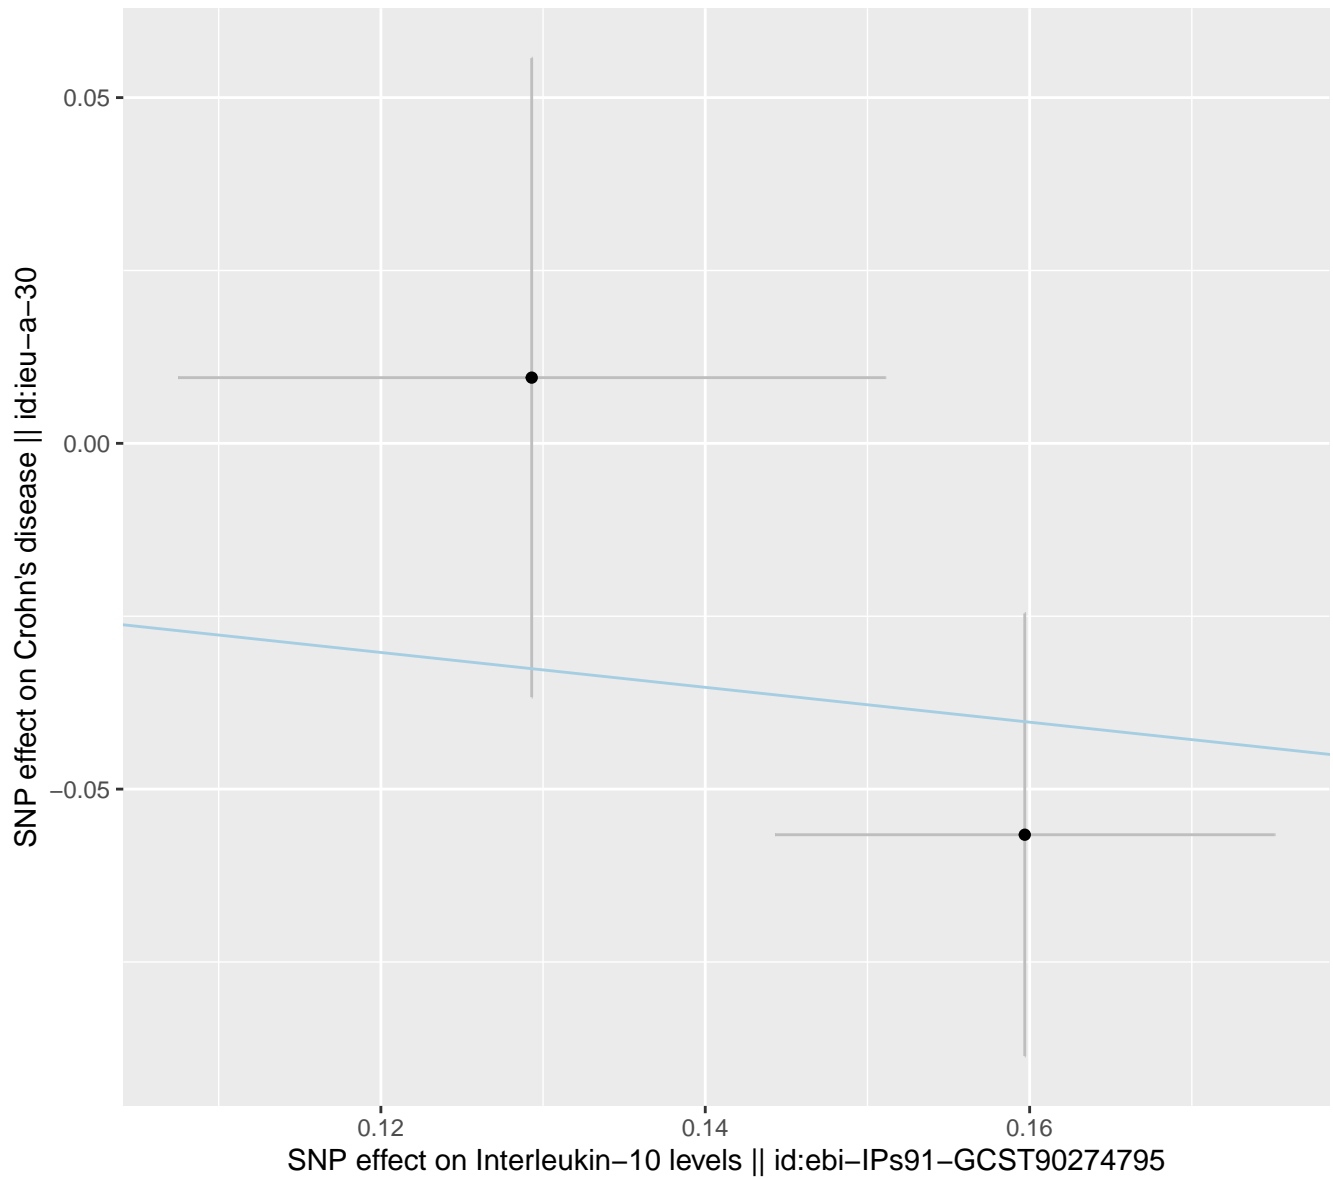

### MR Test

Inverse variance weighted

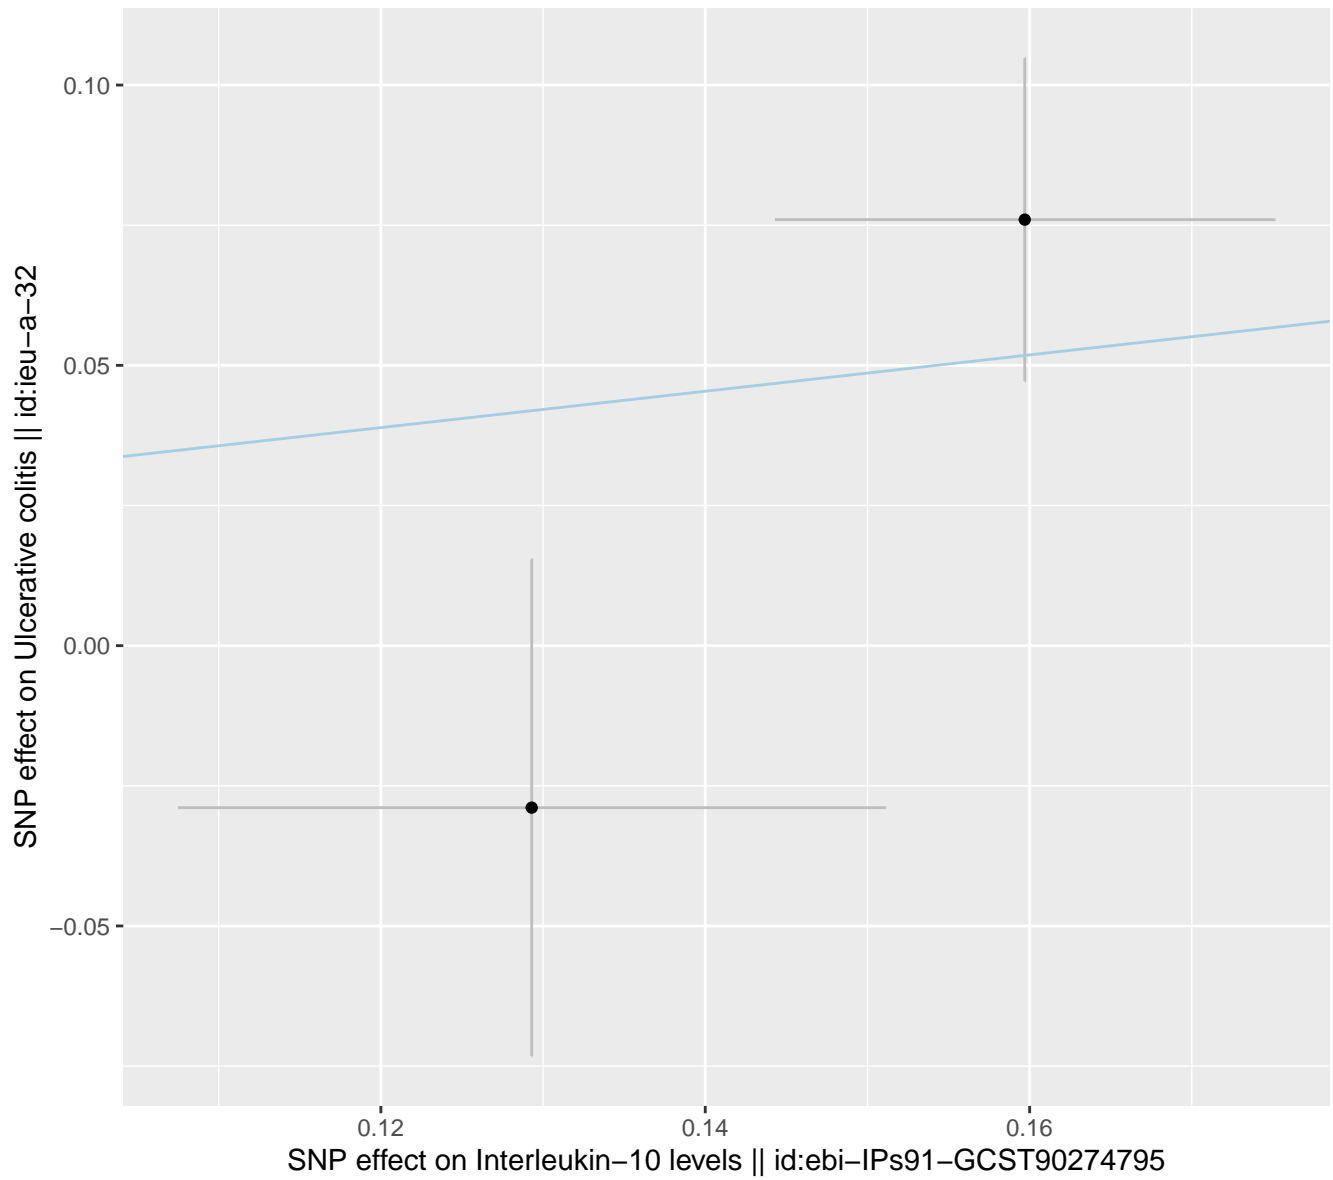

### MR Test

- Inverse variance weighted
- MR Egger
- Weighted median
- Weighted mode

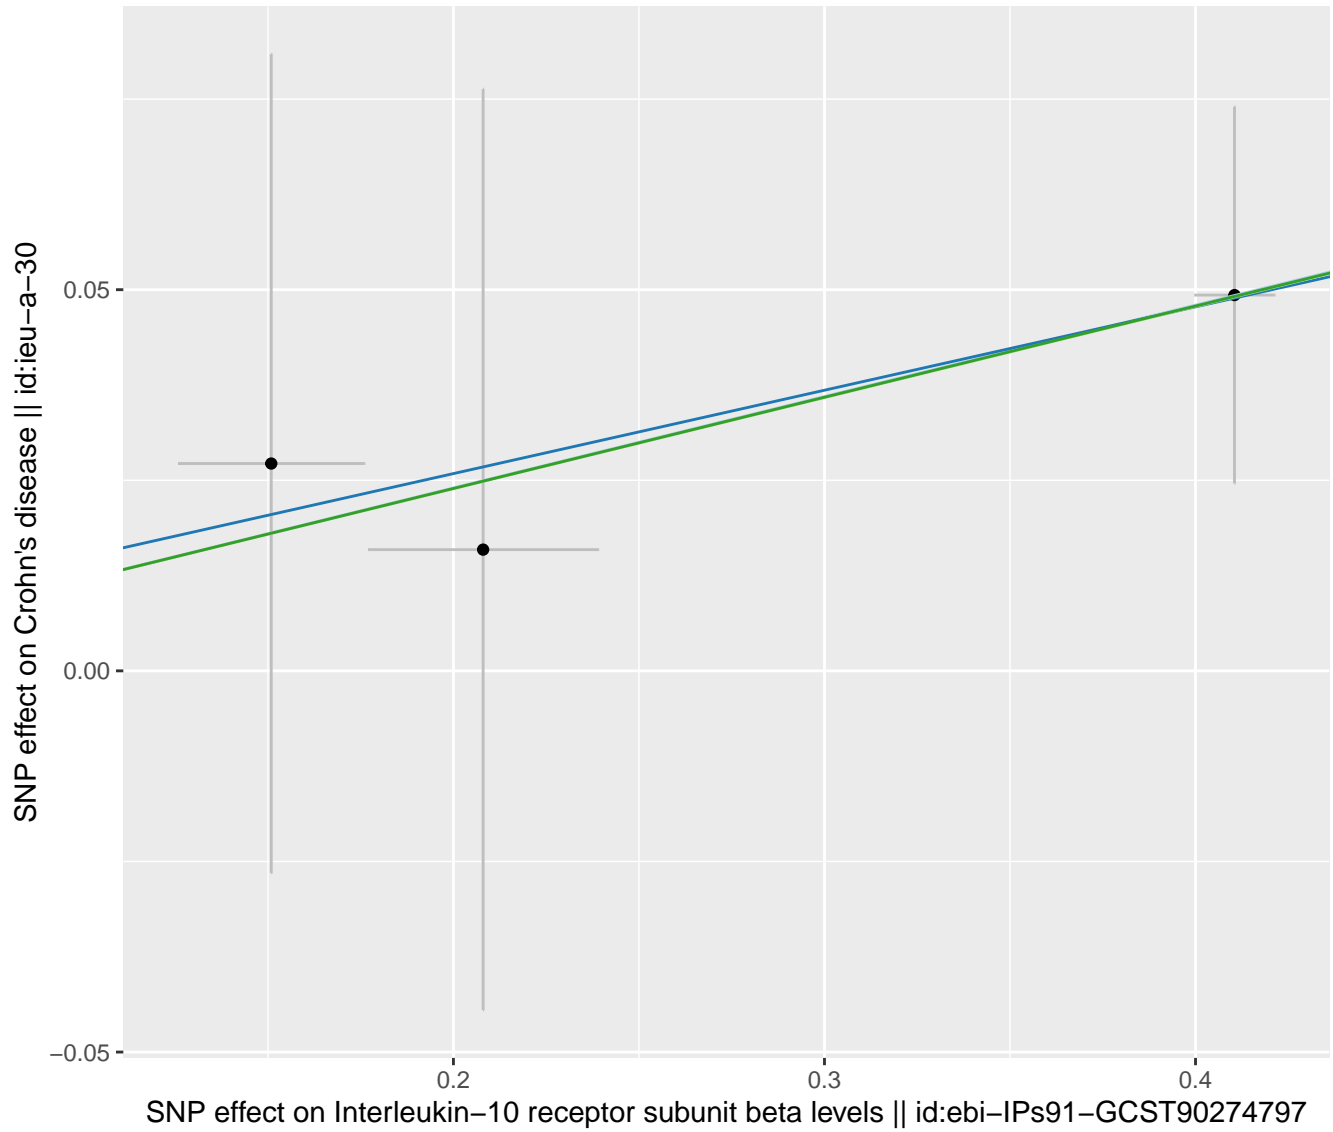

### MR Test

- Inverse variance weighted
- MR Egger
- Weighted median
- Weighted mode

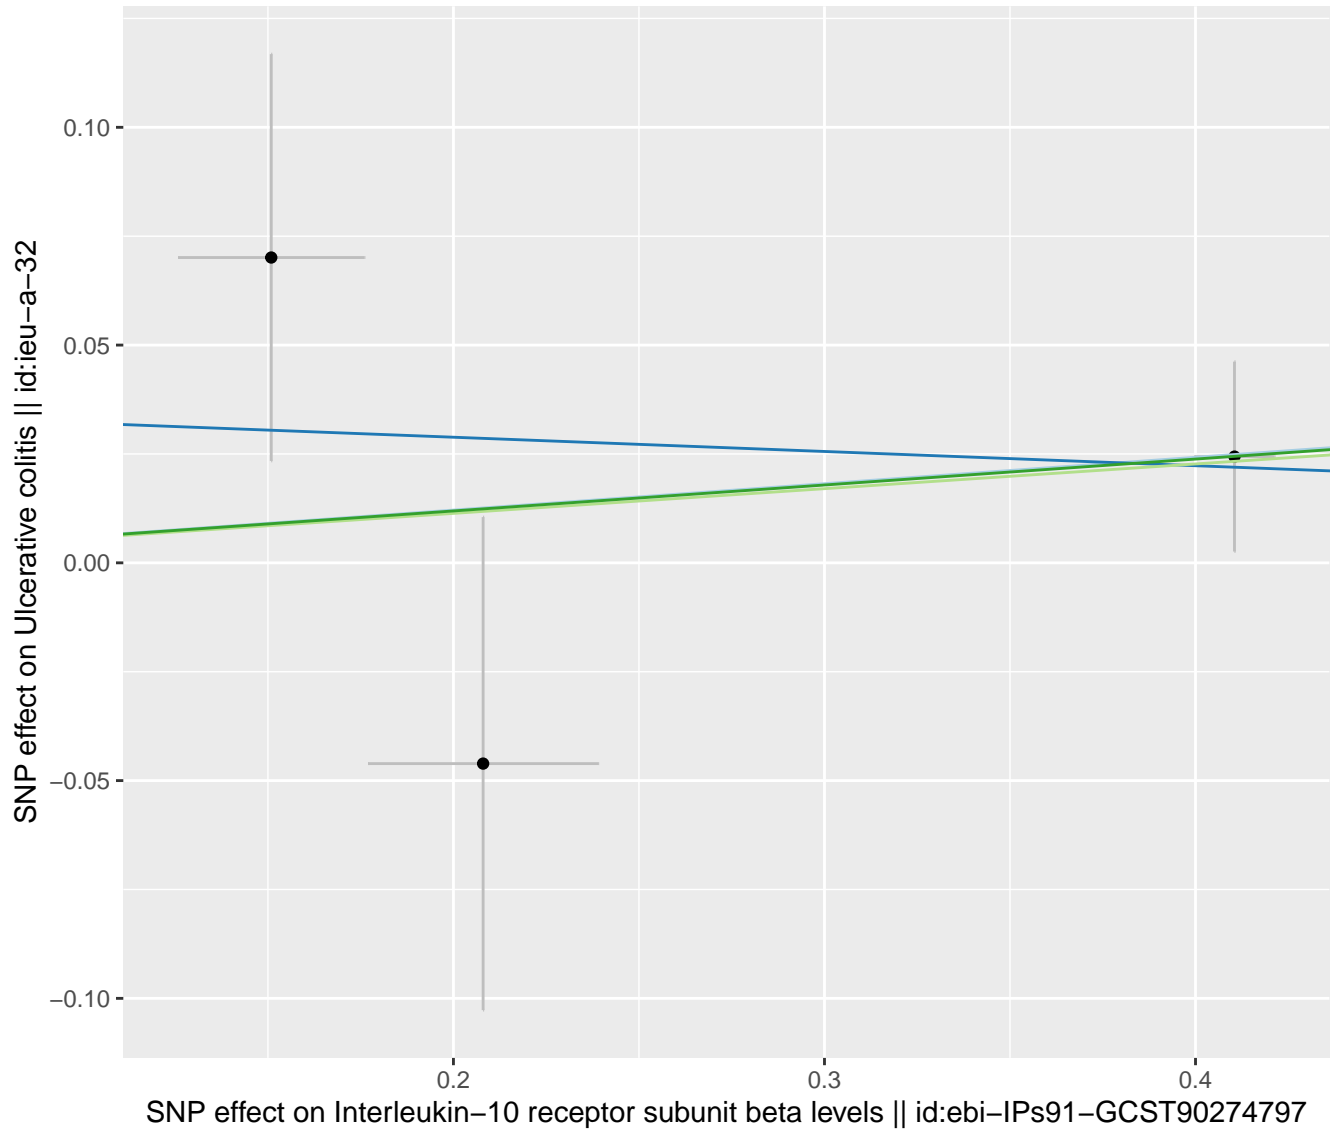



### MR Test

- Inverse variance weighted
- MR Egger
- Weighted median
- Weighted mode

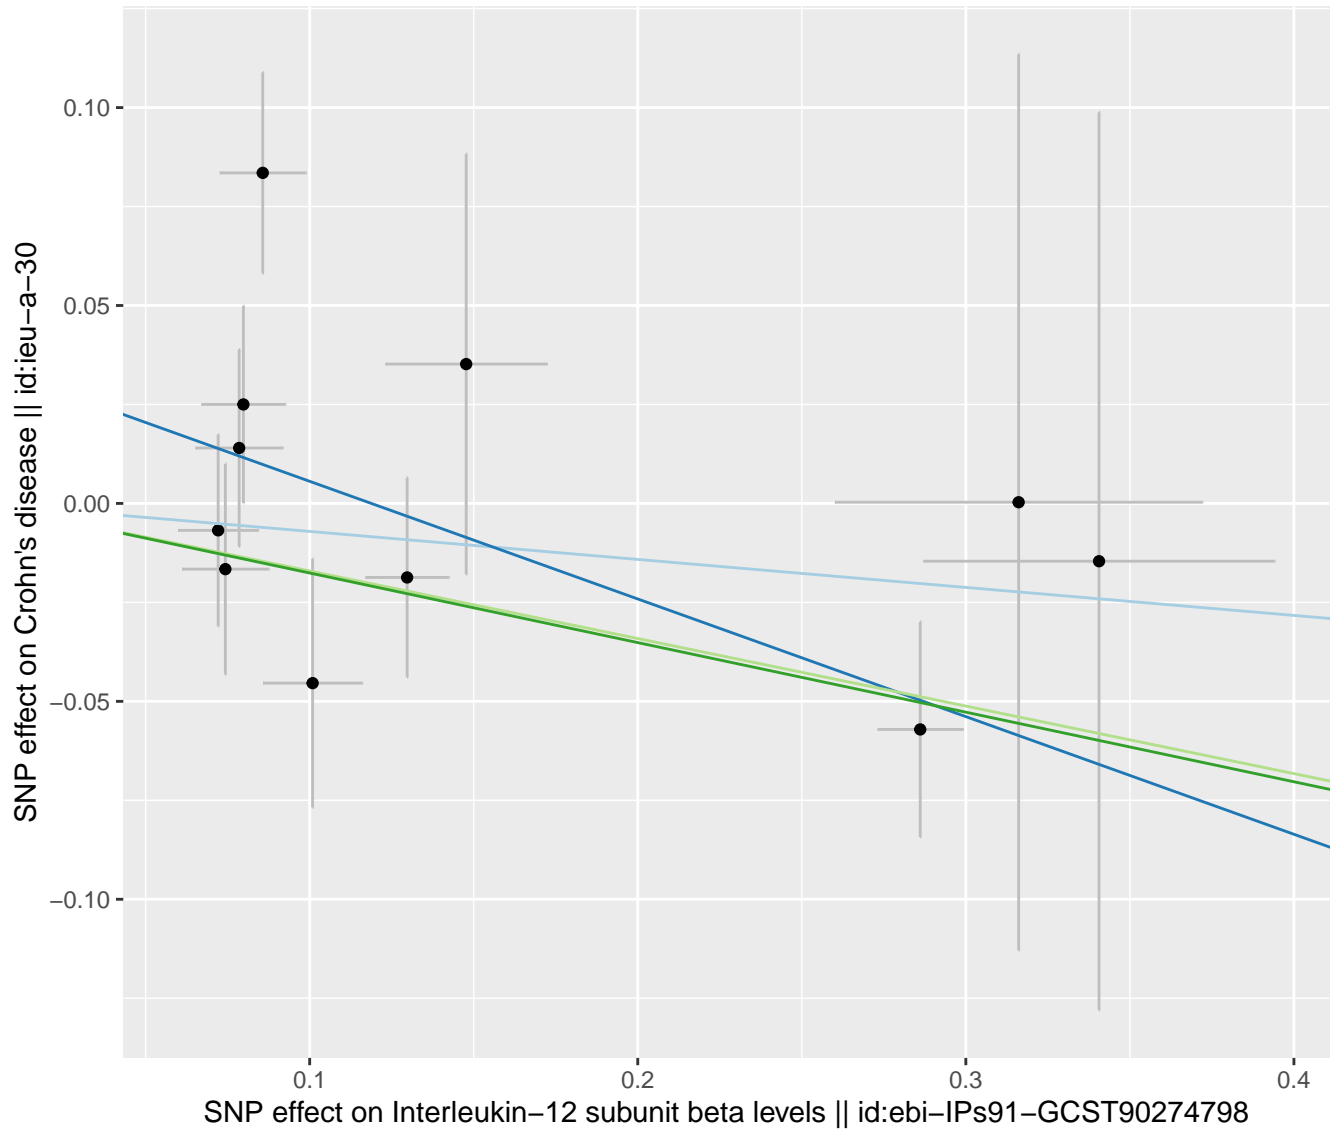

### MR Test

- Inverse variance weighted
- MR Egger
- Weighted median
- Weighted mode

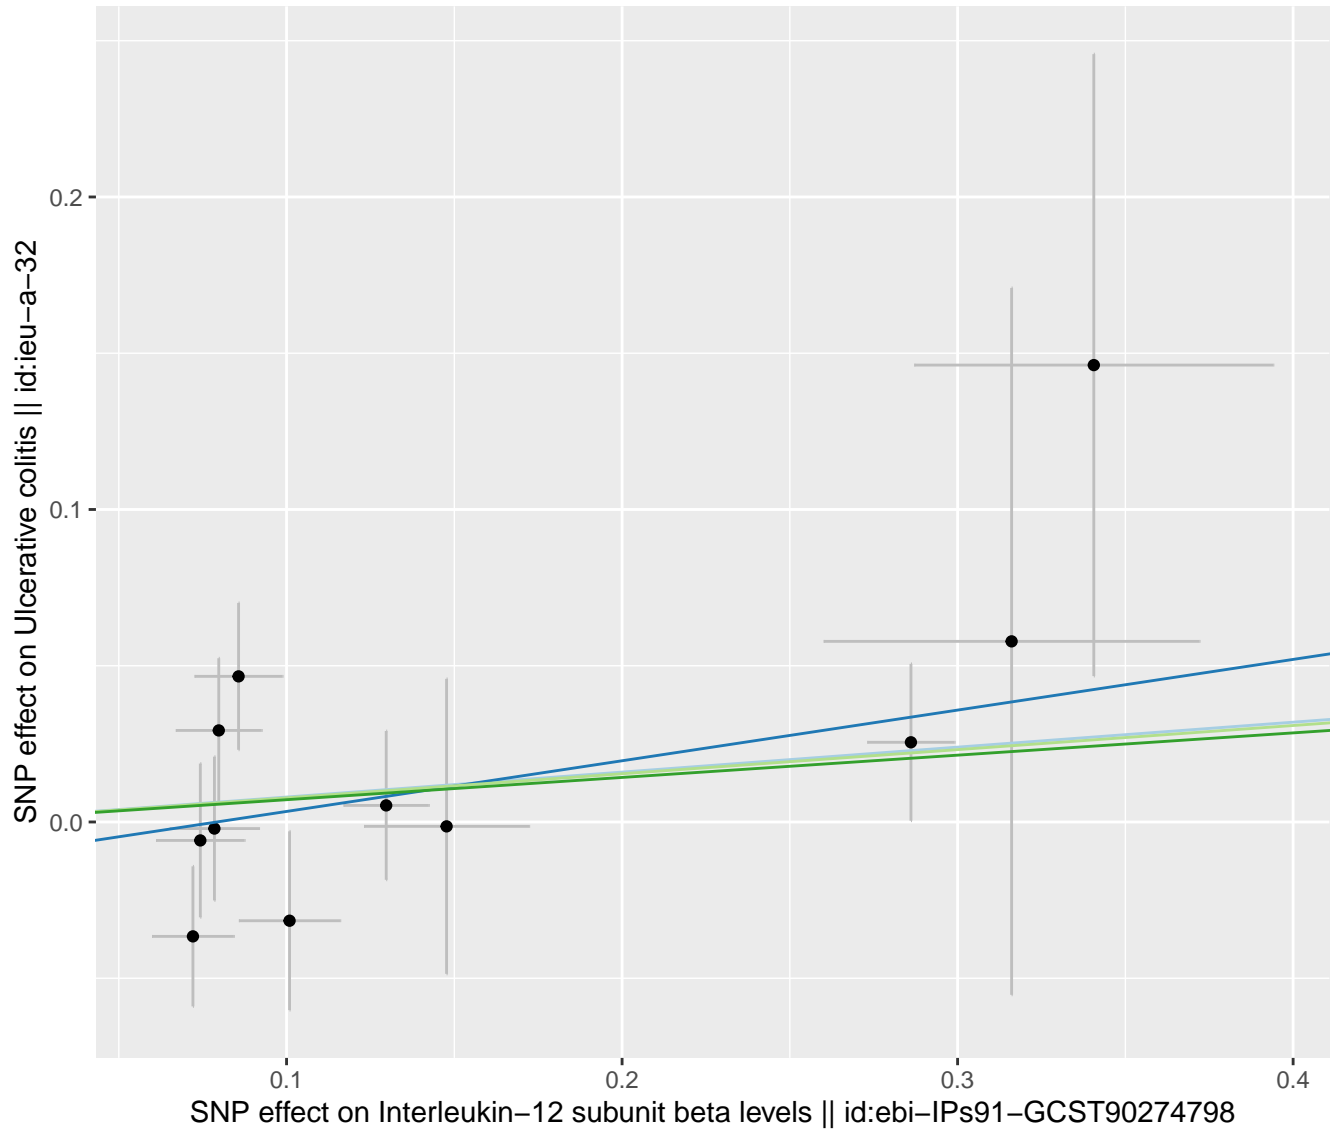

MR Test

- Inverse variance weighted
- MR Egger
- Weighted median
- Weighted mode

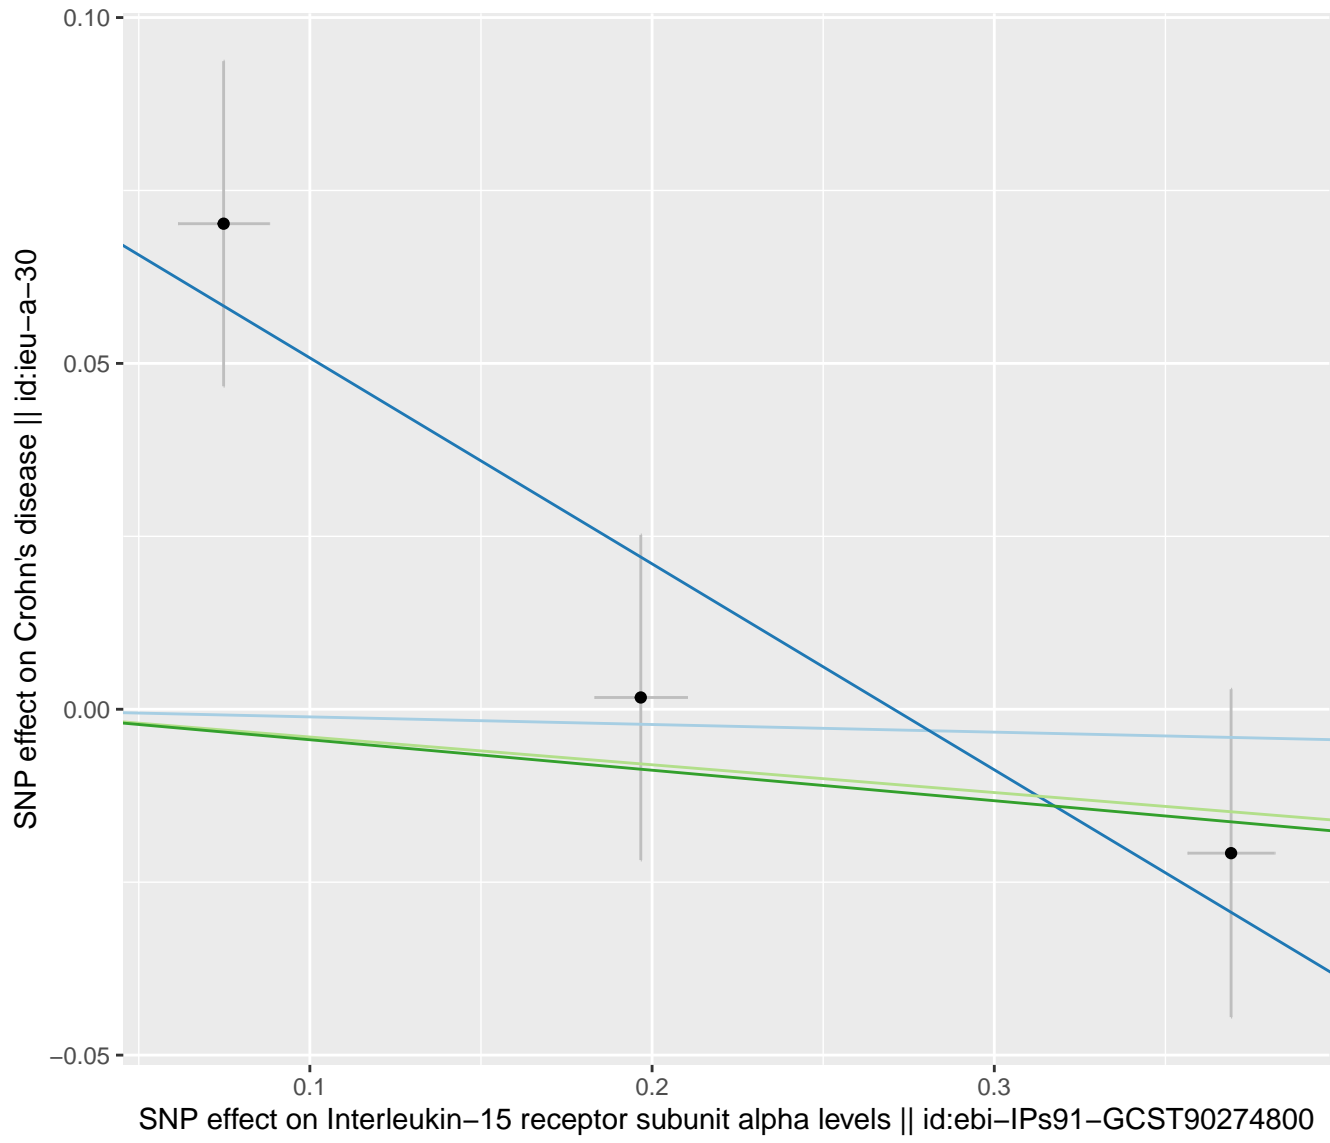

MR Test

- Inverse variance weighted
- MR Egger
- Weighted median
- Weighted mode

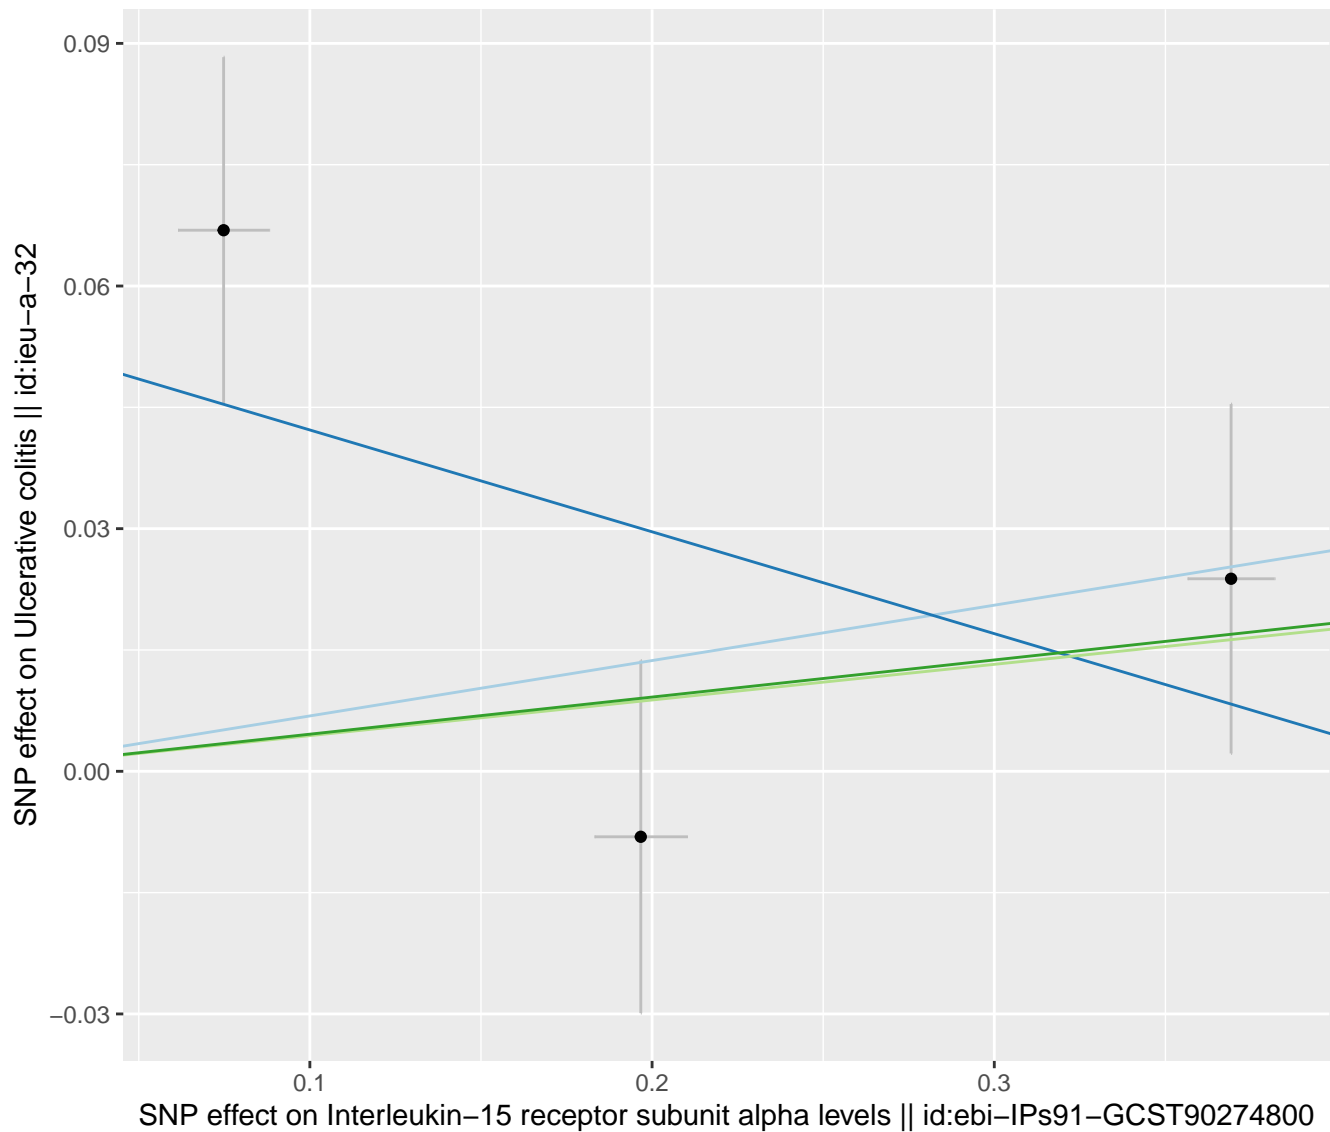

MR Test

Inverse variance weighted

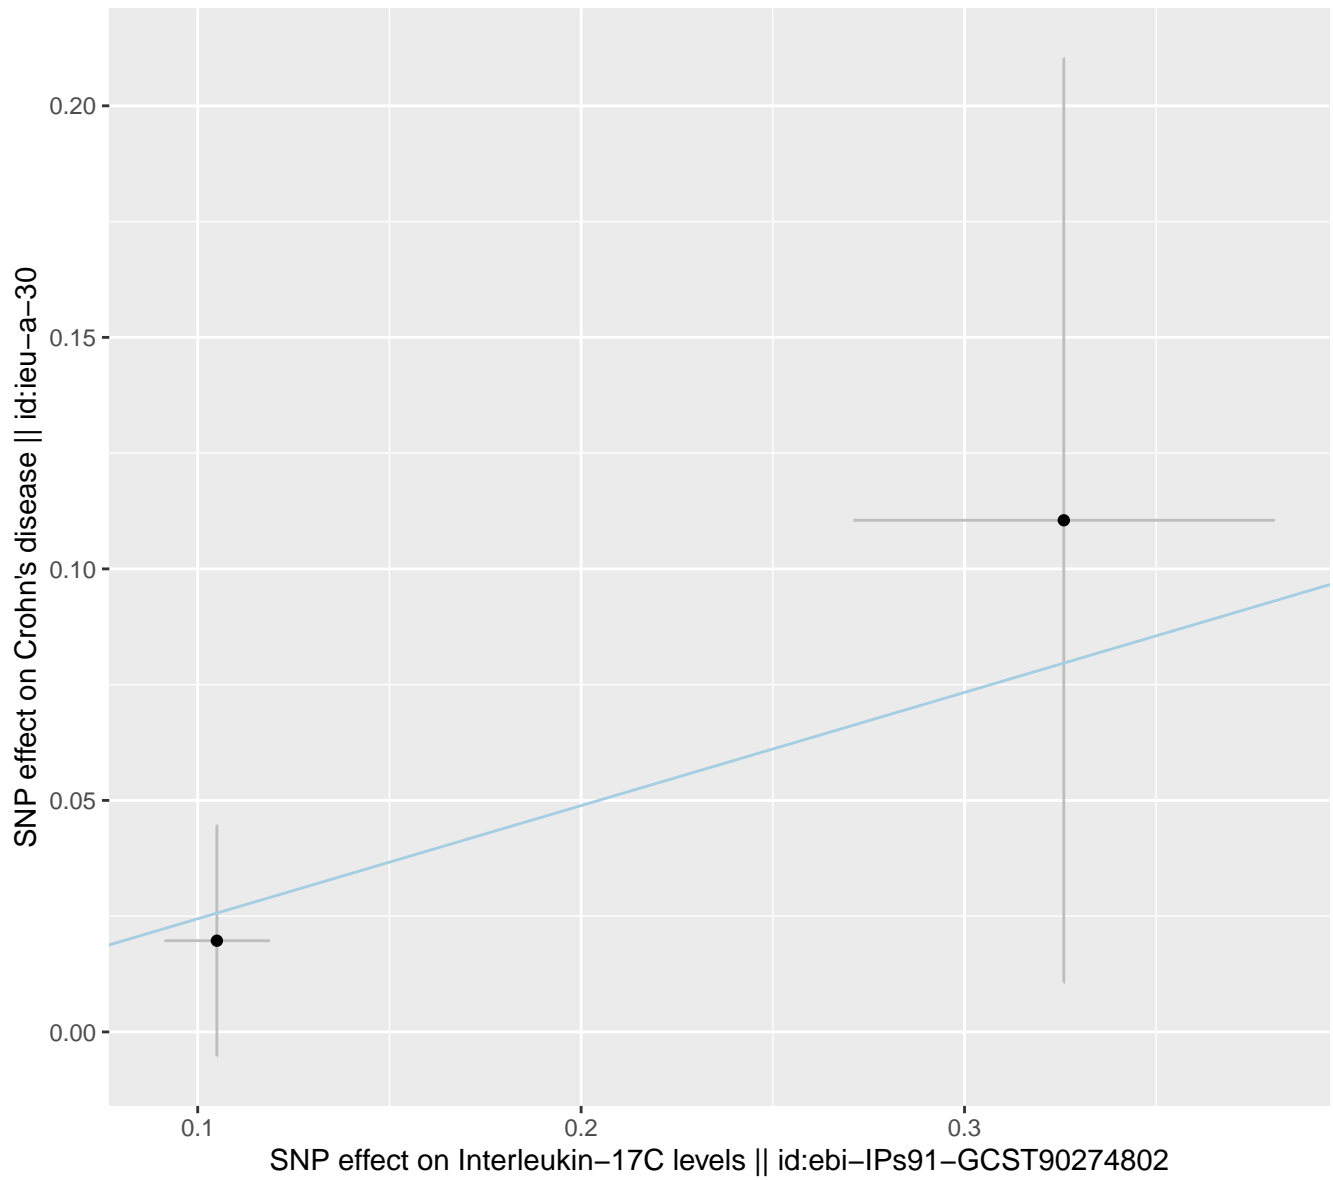

# MR Test

Inverse variance weighted

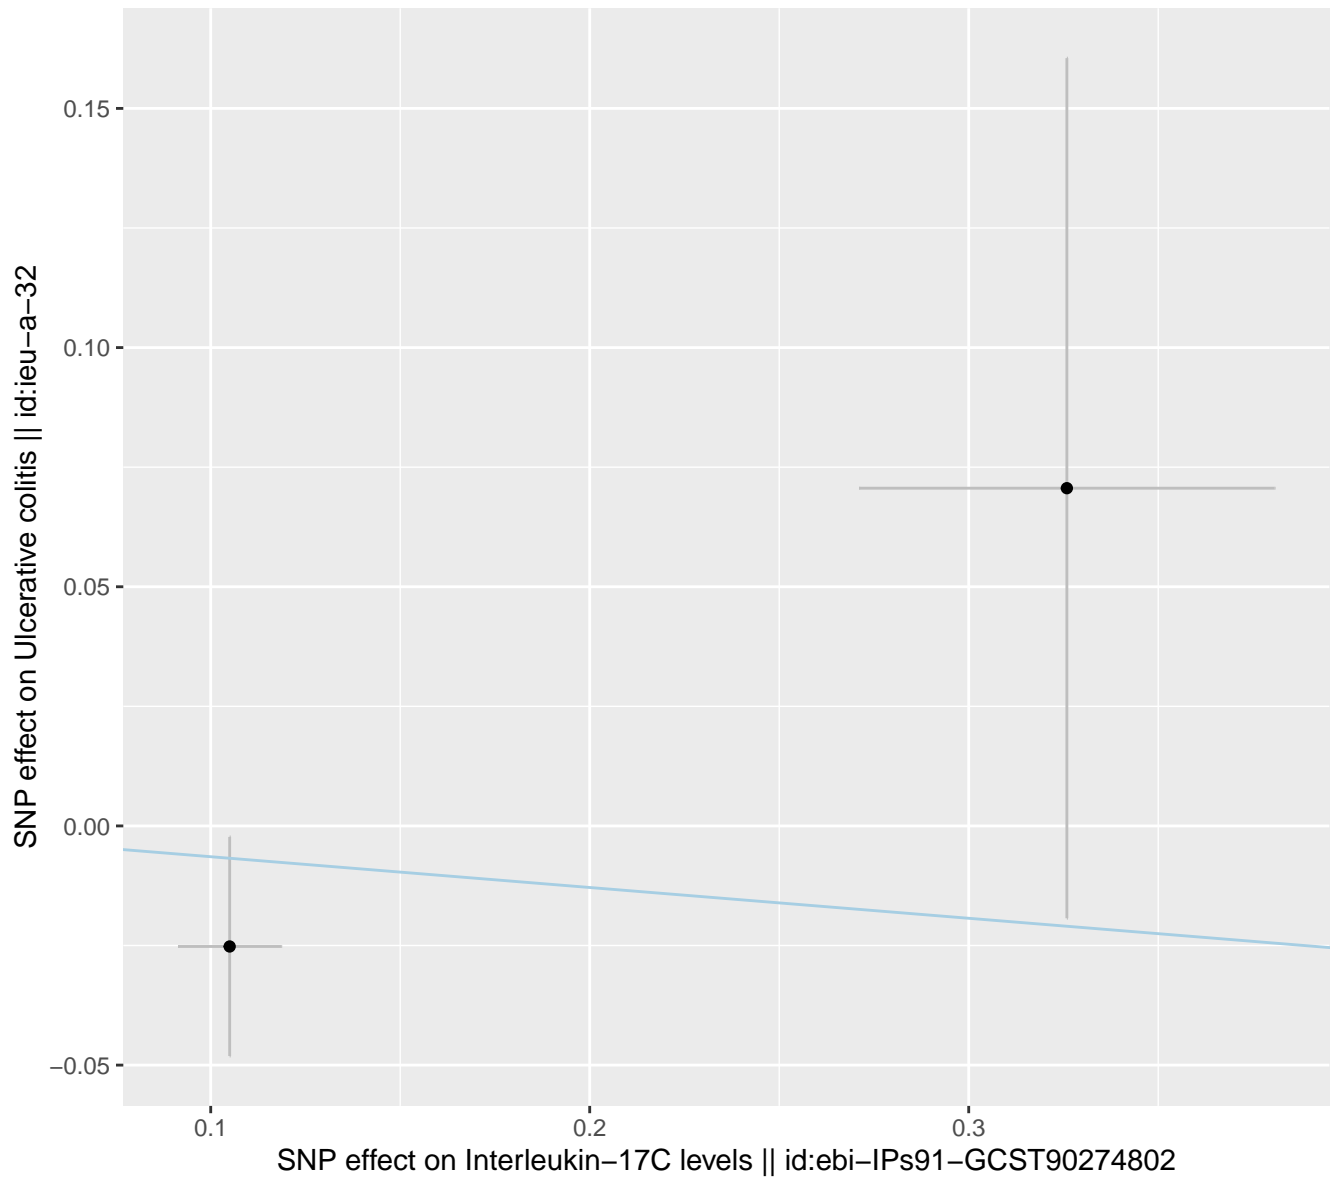

### MR Test

- Inverse variance weighted
- MR Egger
- Weighted median
- Weighted mode

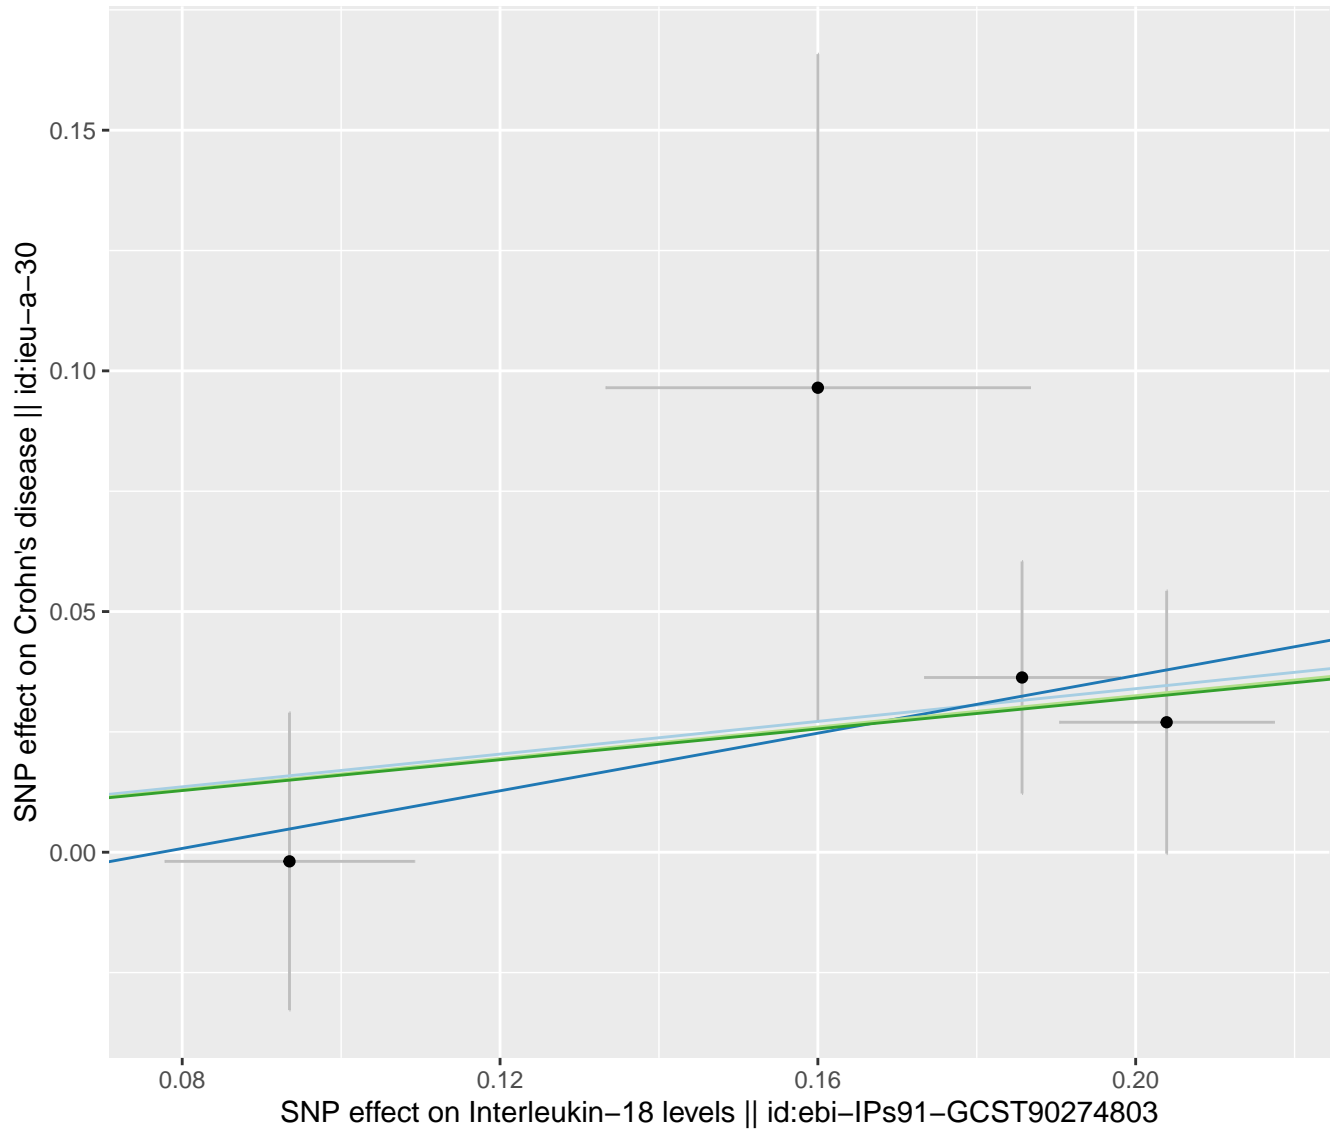

### MR Test

- Inverse variance weighted
- MR Egger
- Weighted median
- Weighted mode

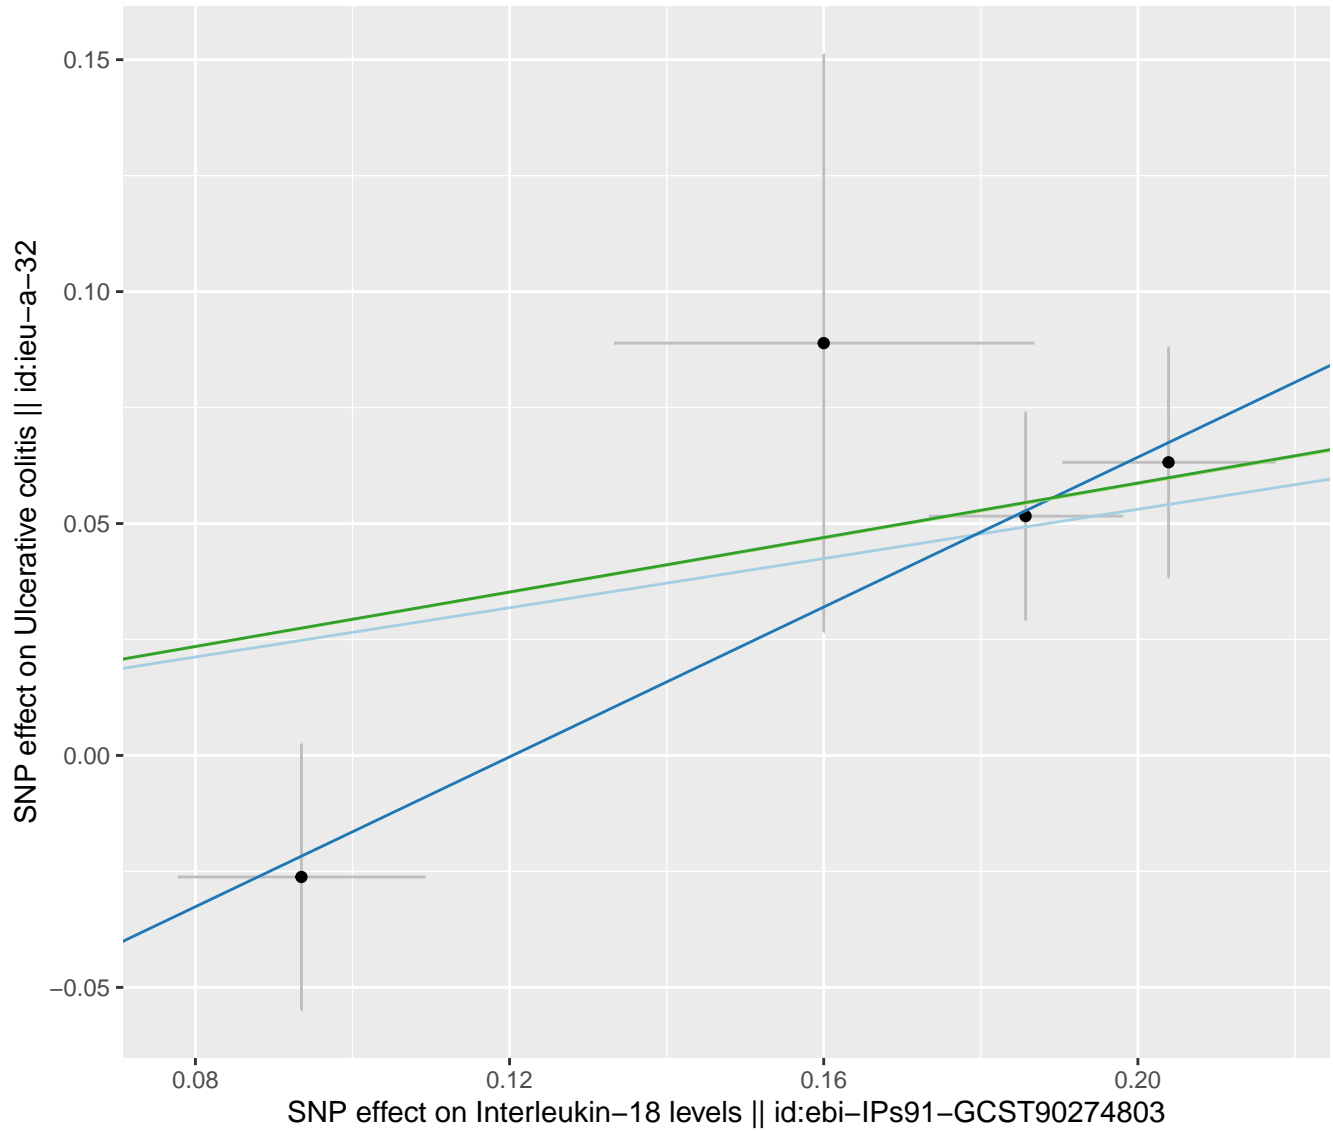



MR Test

- Inverse variance weighted
- MR Egger
- Weighted median
- Weighted mode

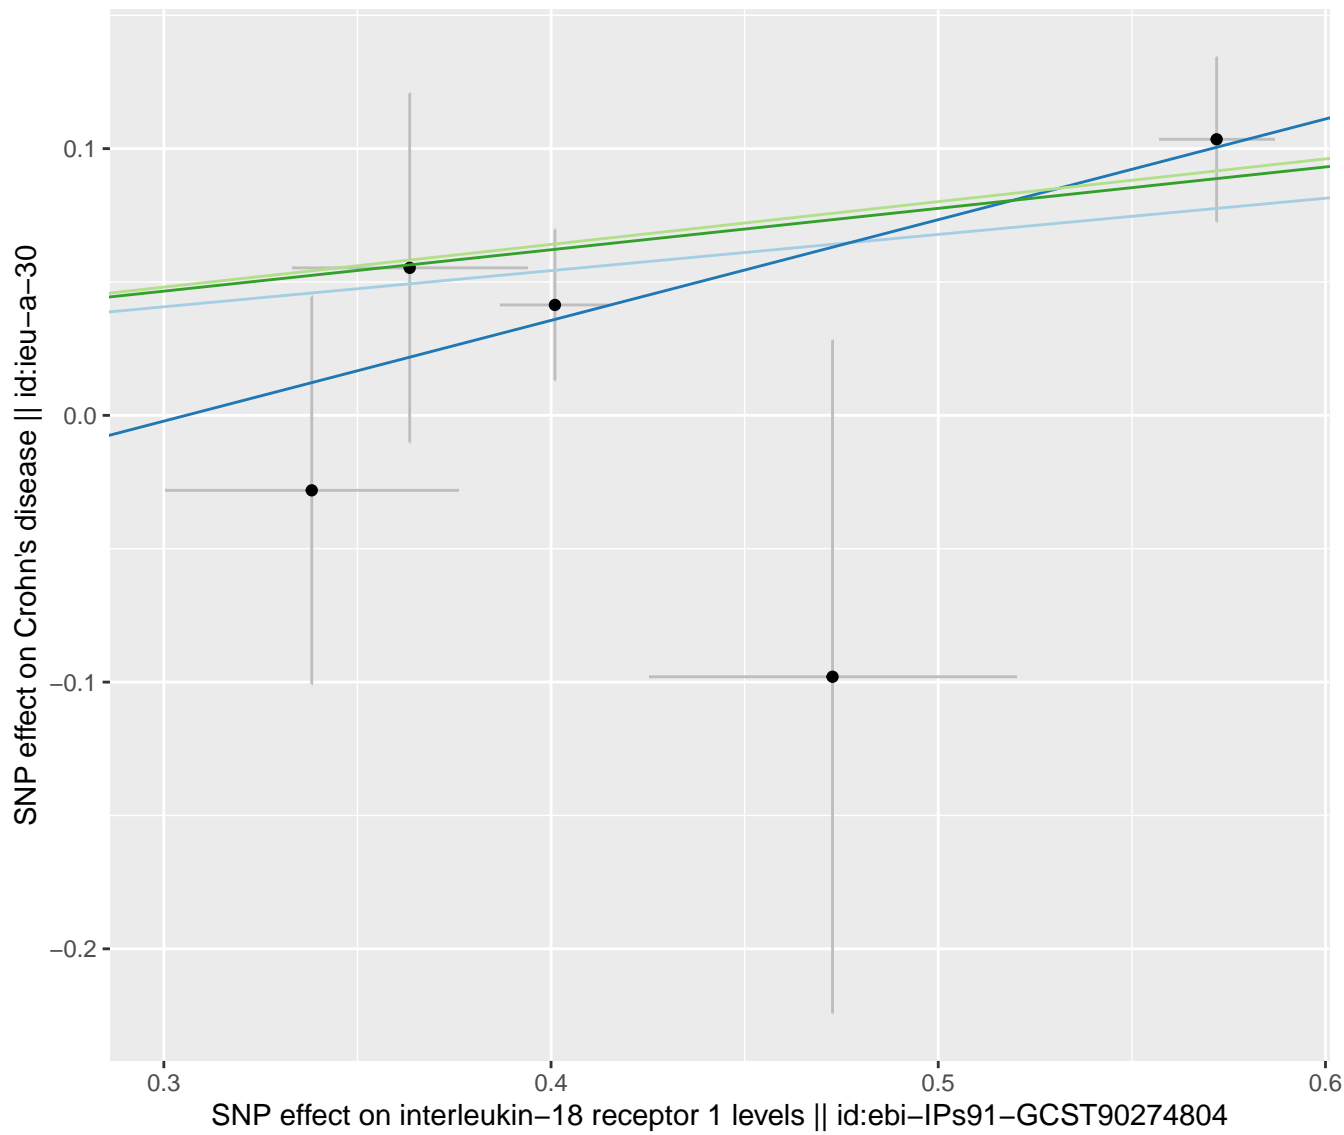

MR Test

- Inverse variance weighted
- MR Egger
- Weighted median
- Weighted mode

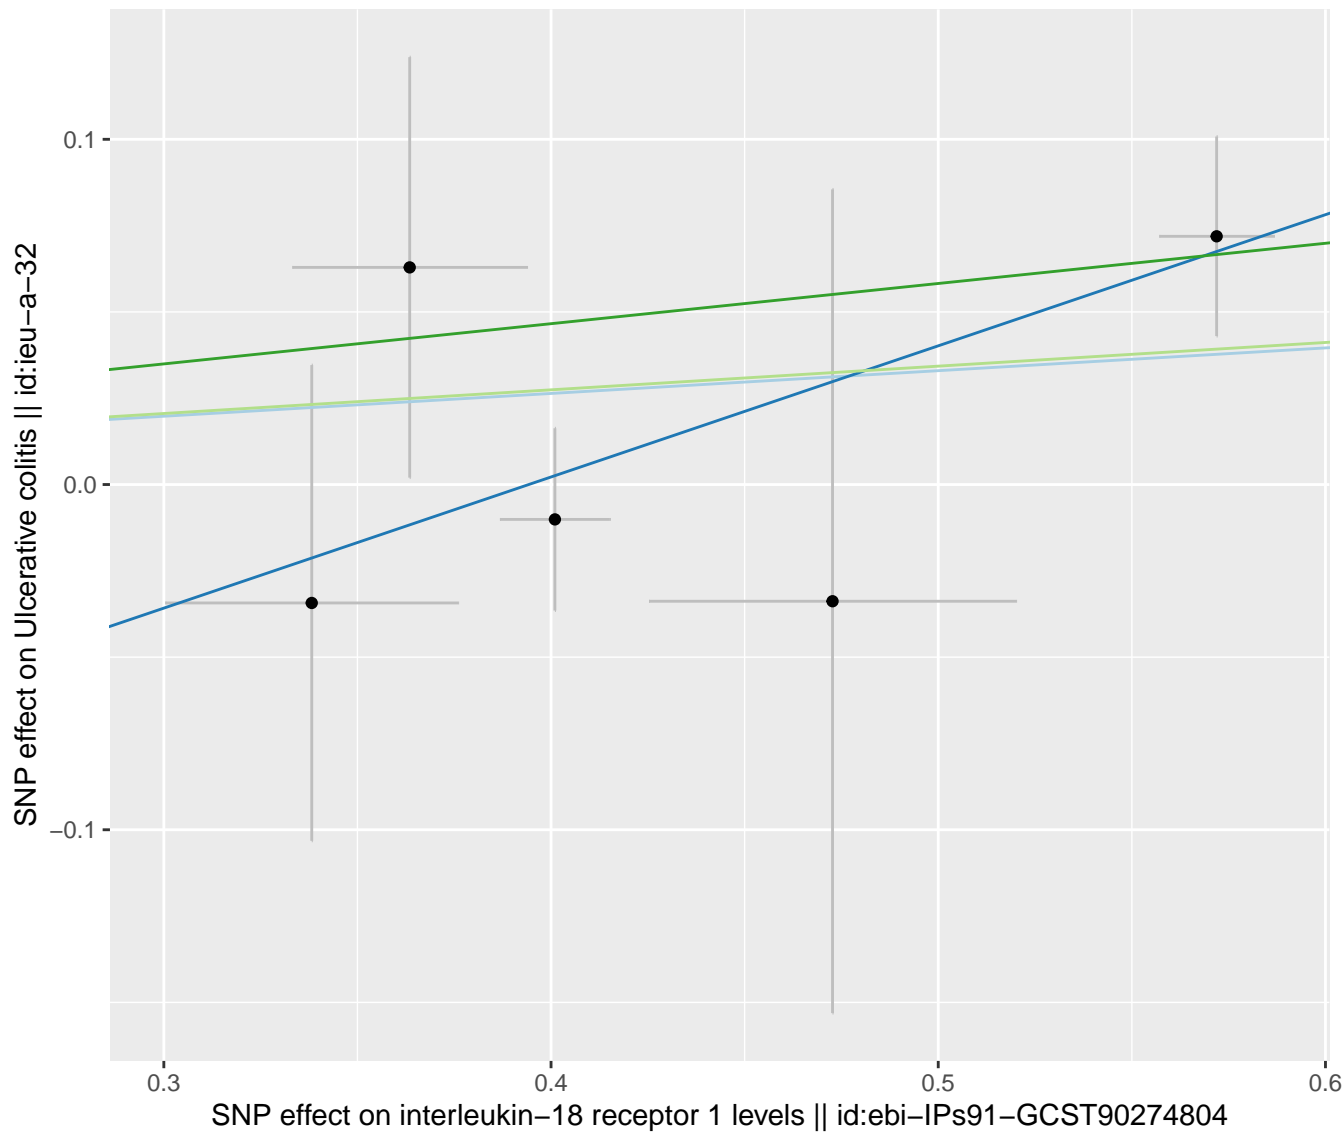

### MR Test

Inverse variance weighted

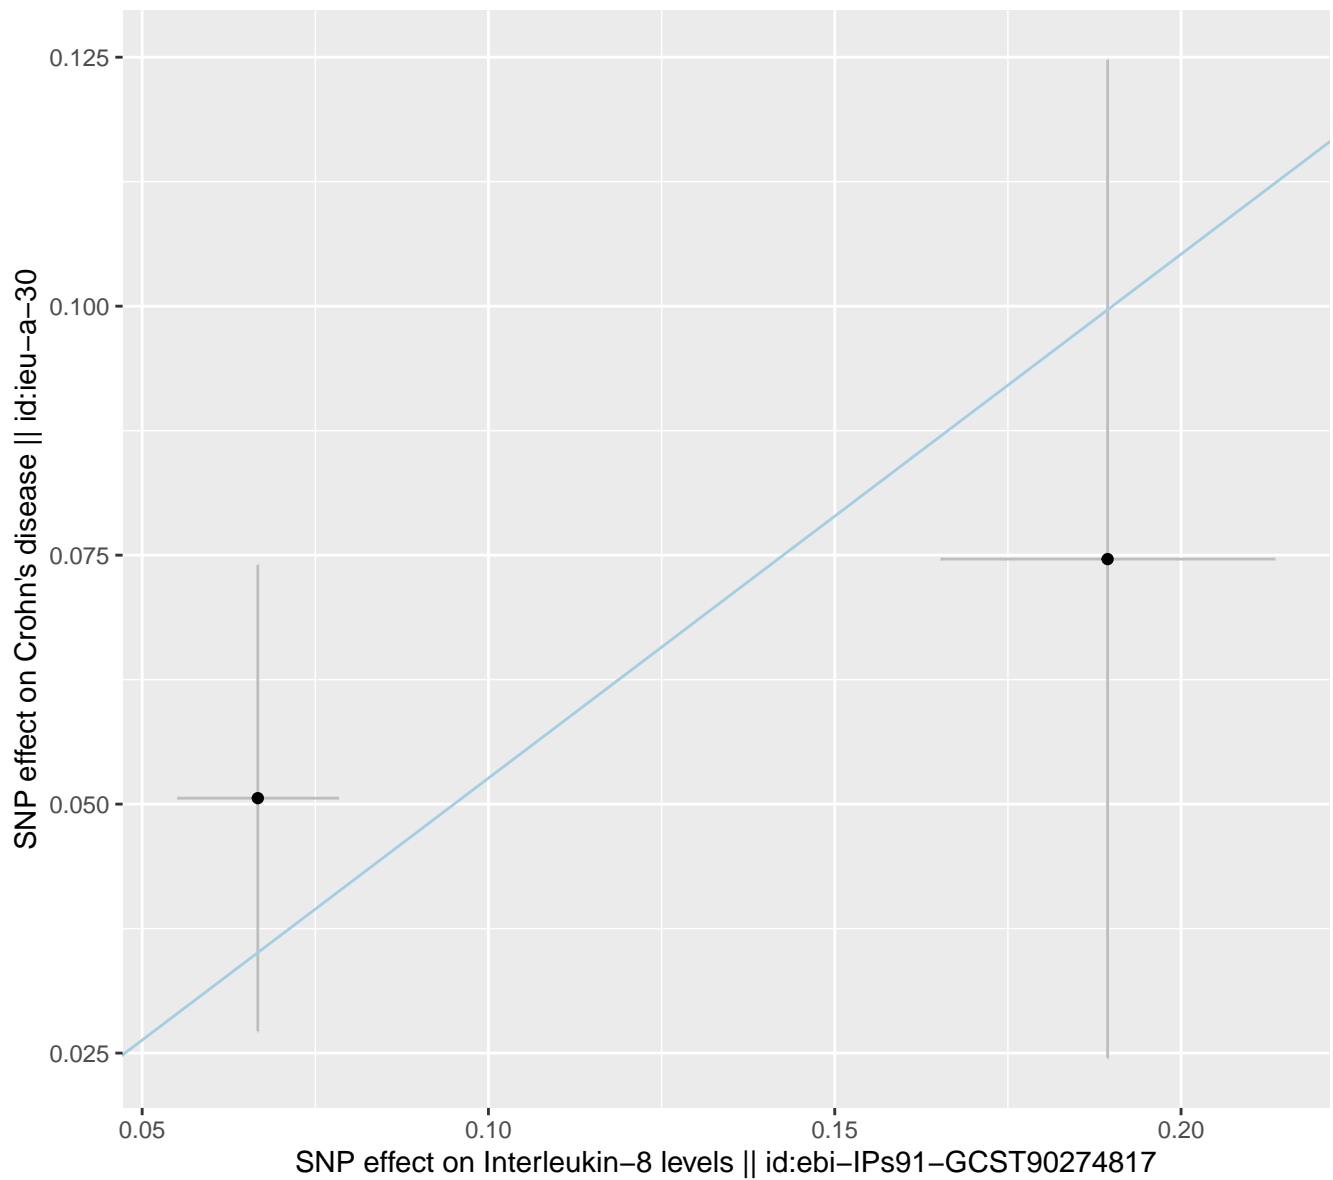

MR Test

Inverse variance weighted

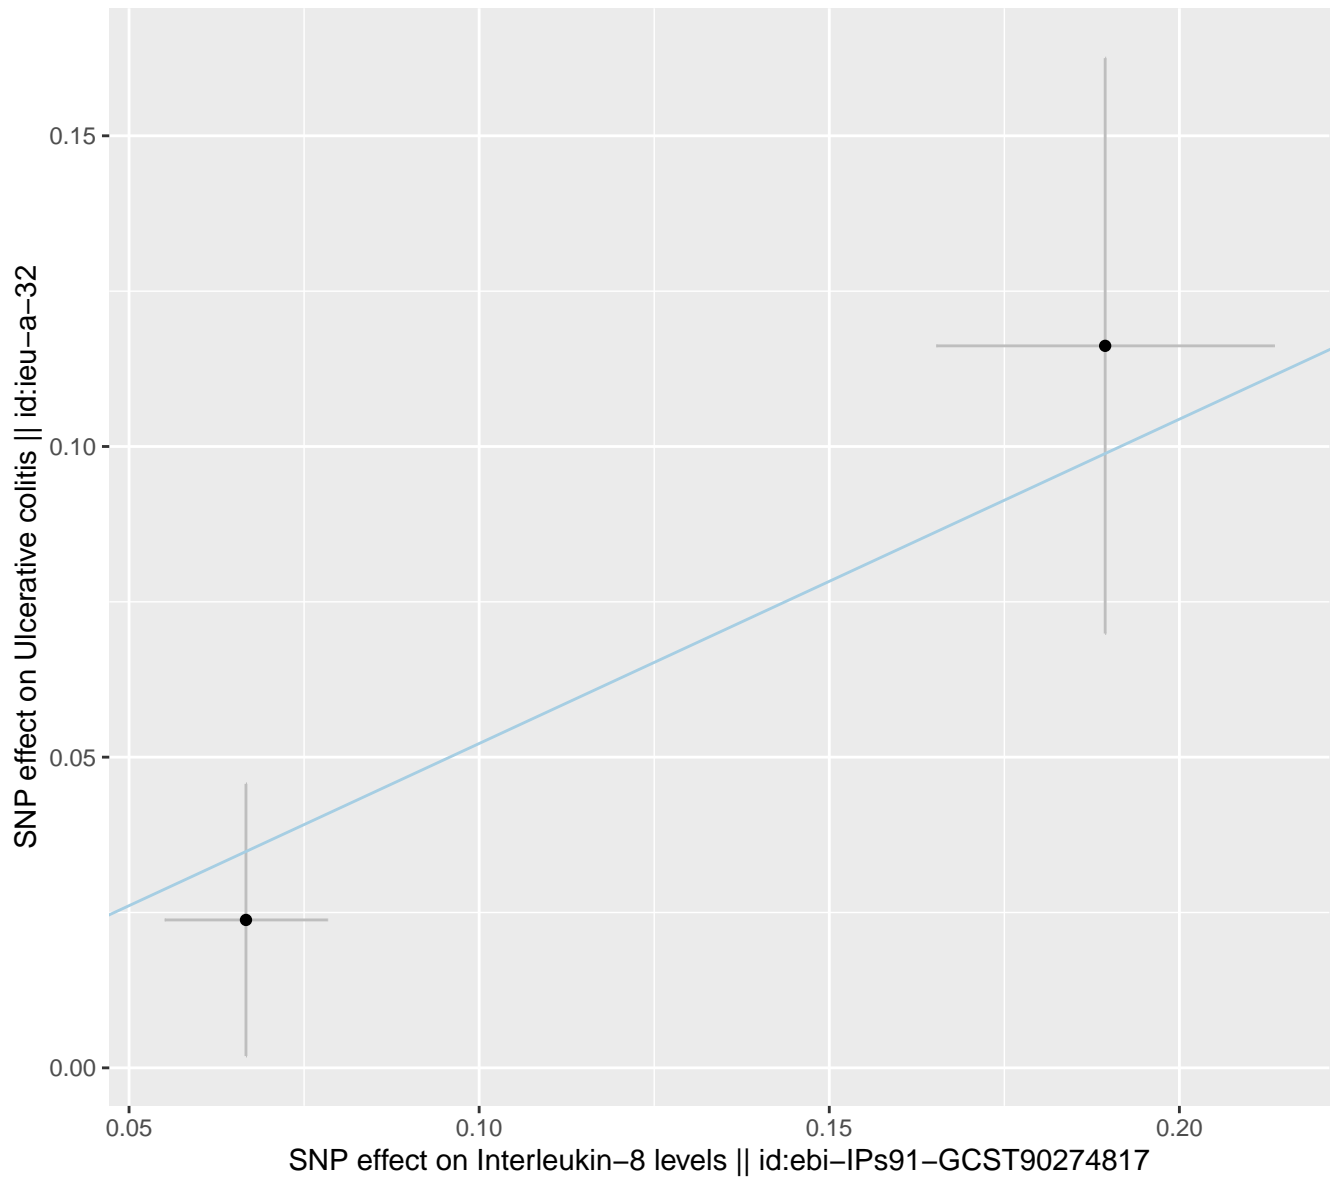

MR Test

Inverse variance weighted

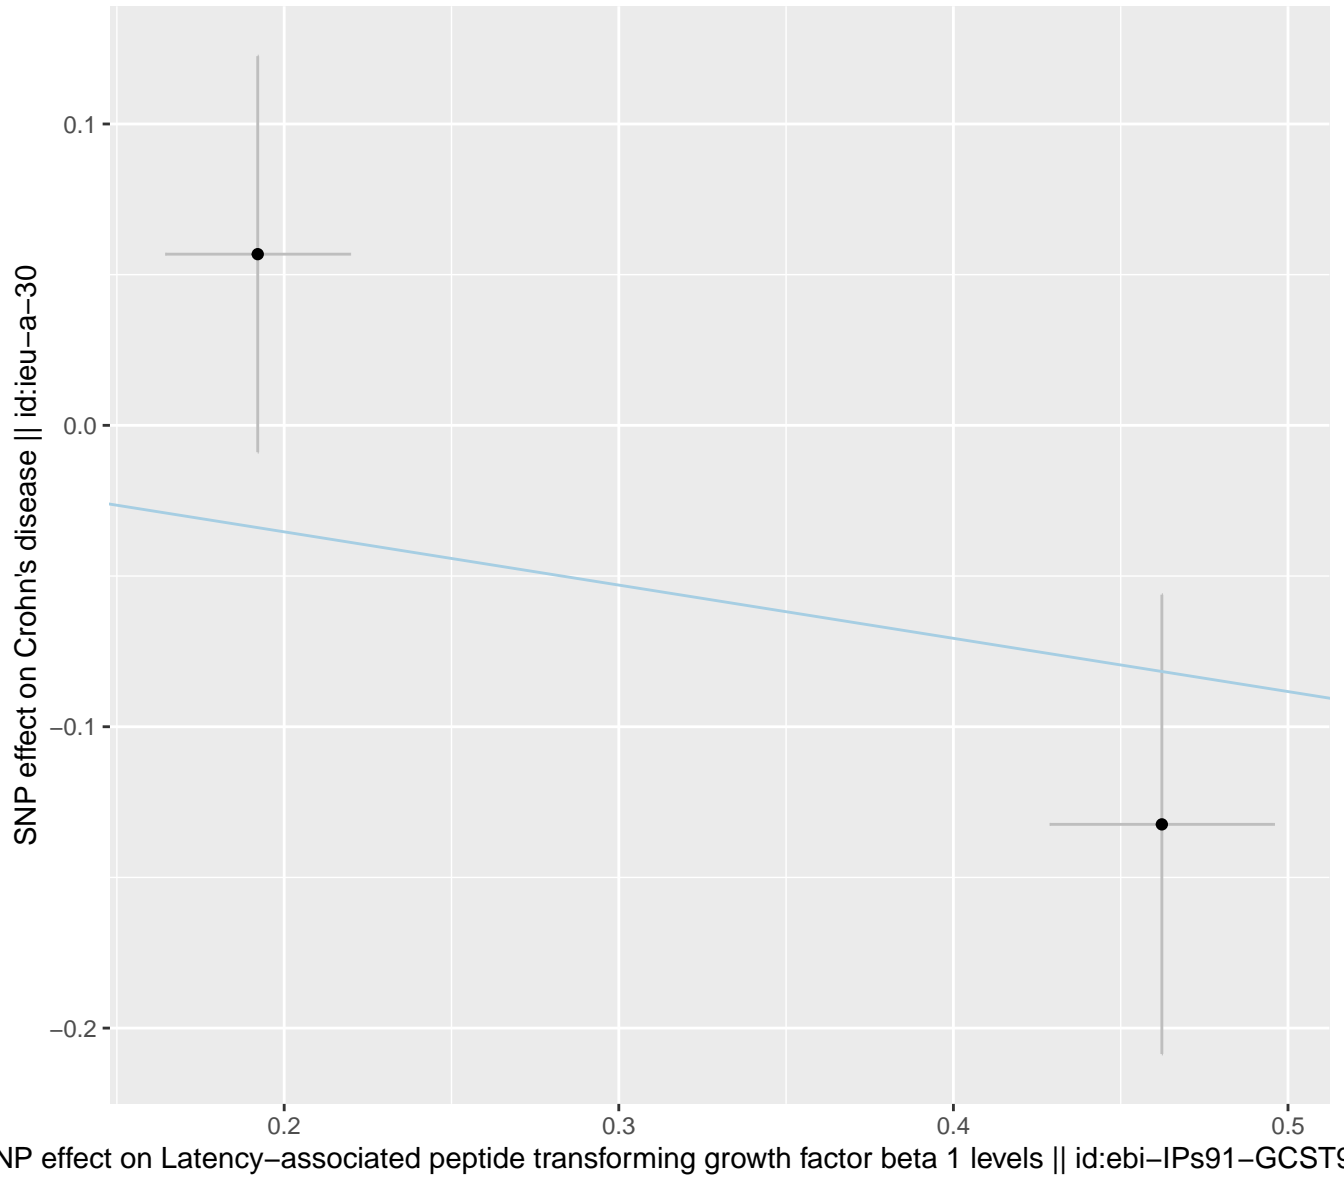

### MR Test

Inverse variance weighted

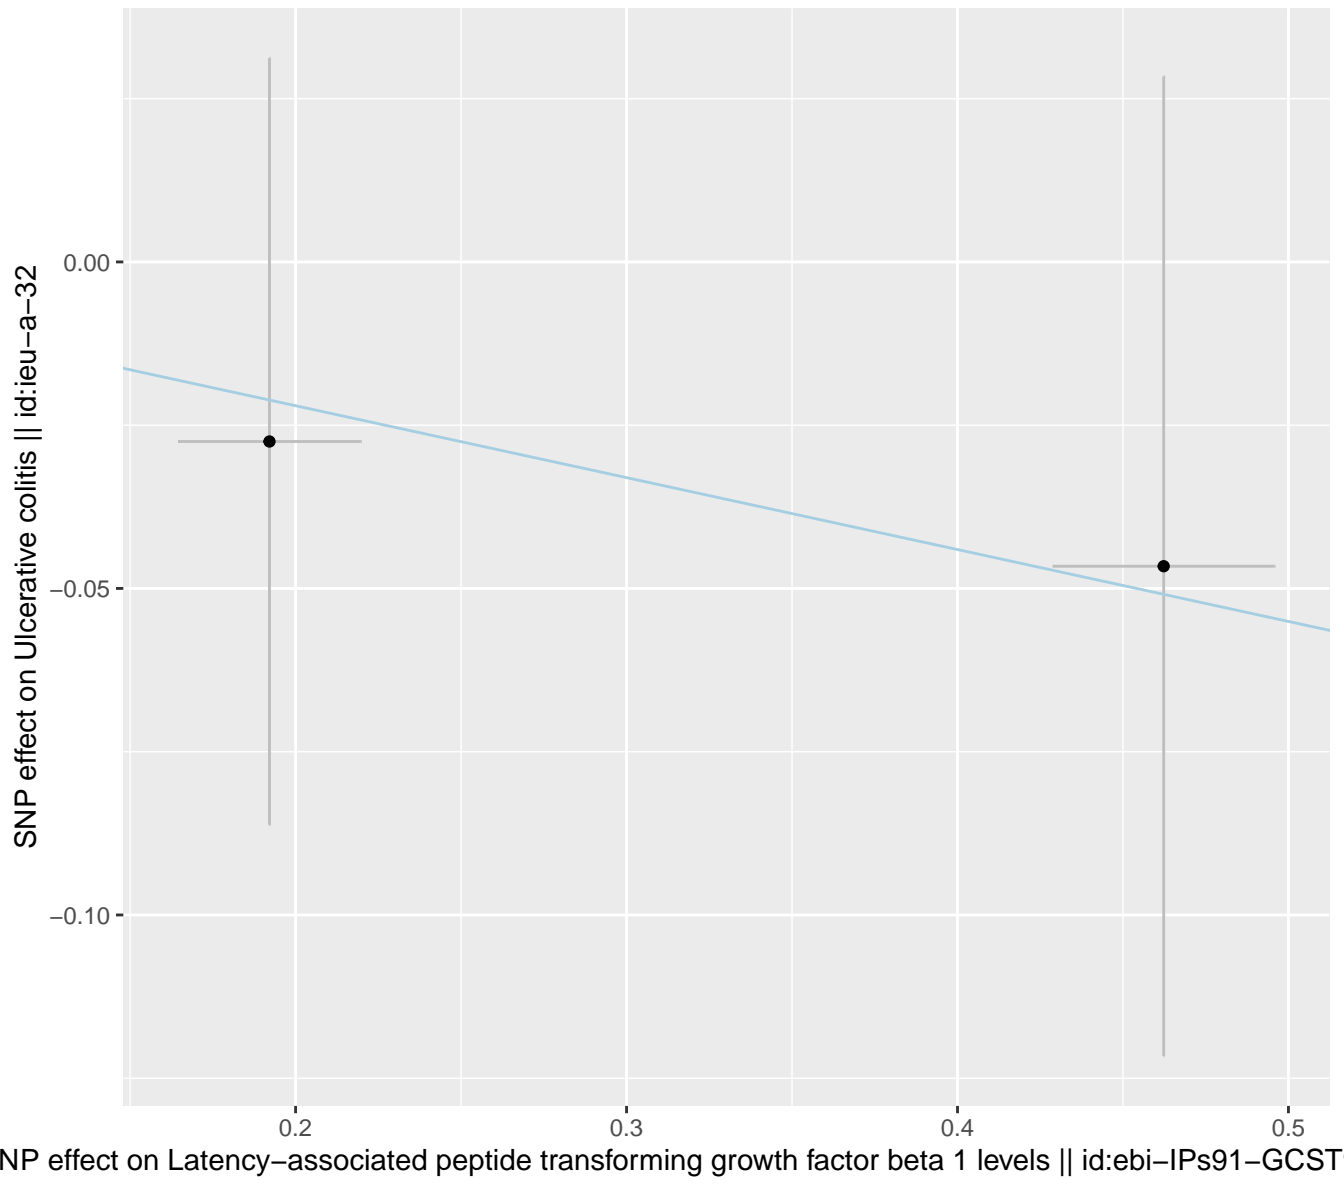

### MR Test

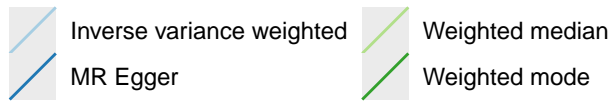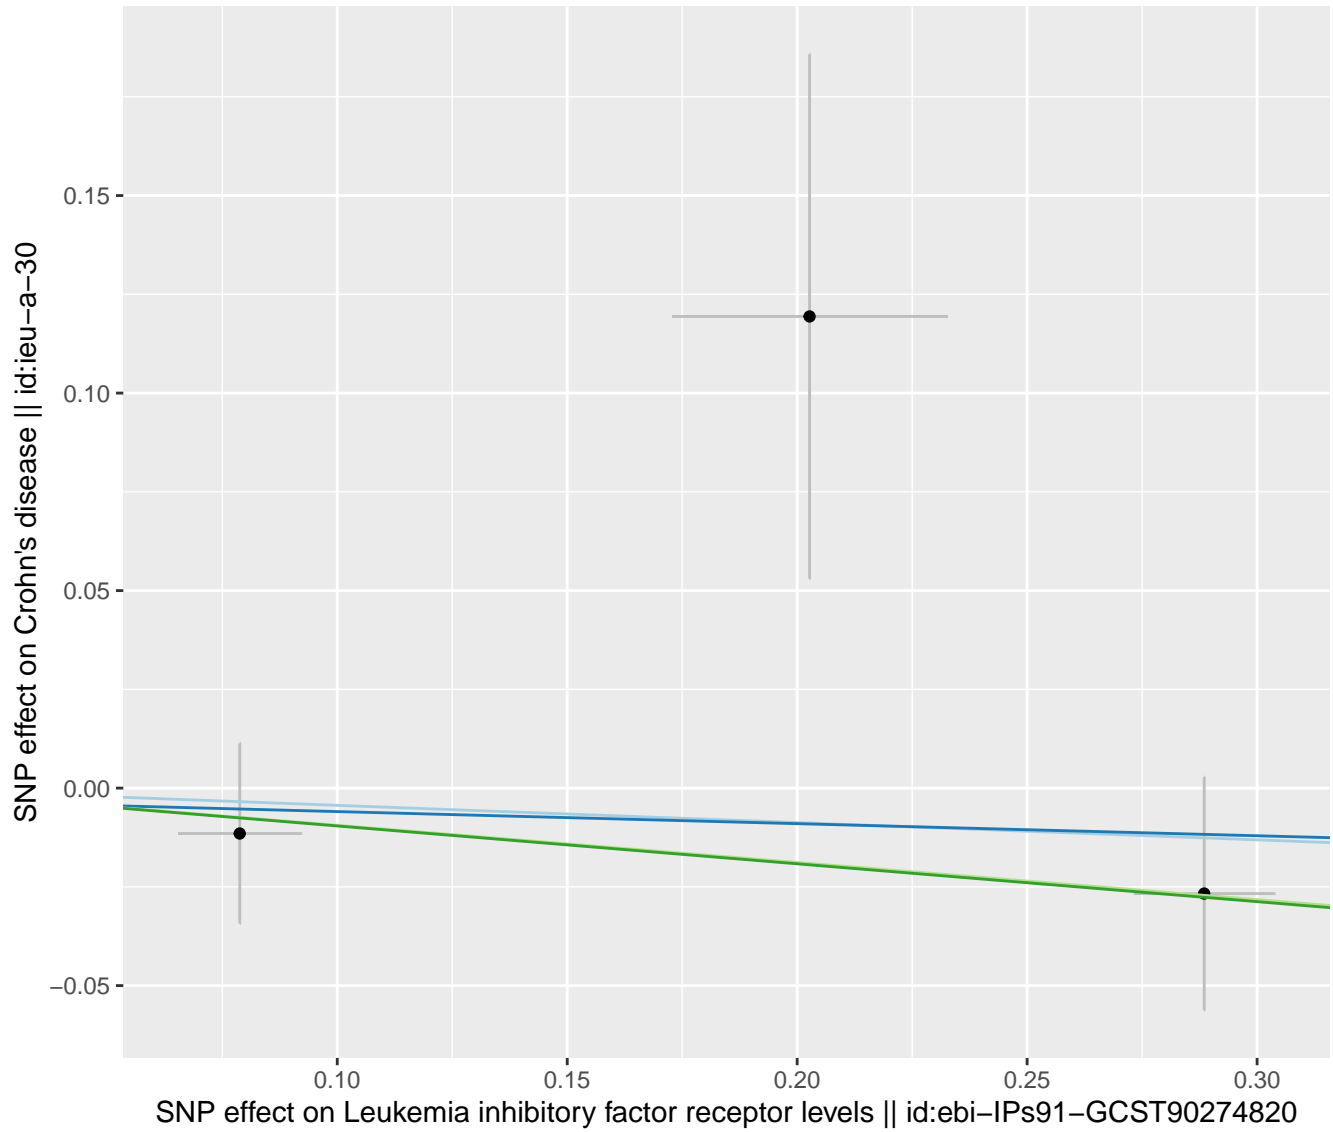

### MR Test

- Inverse variance weighted
- MR Egger
- Weighted median
- Weighted mode

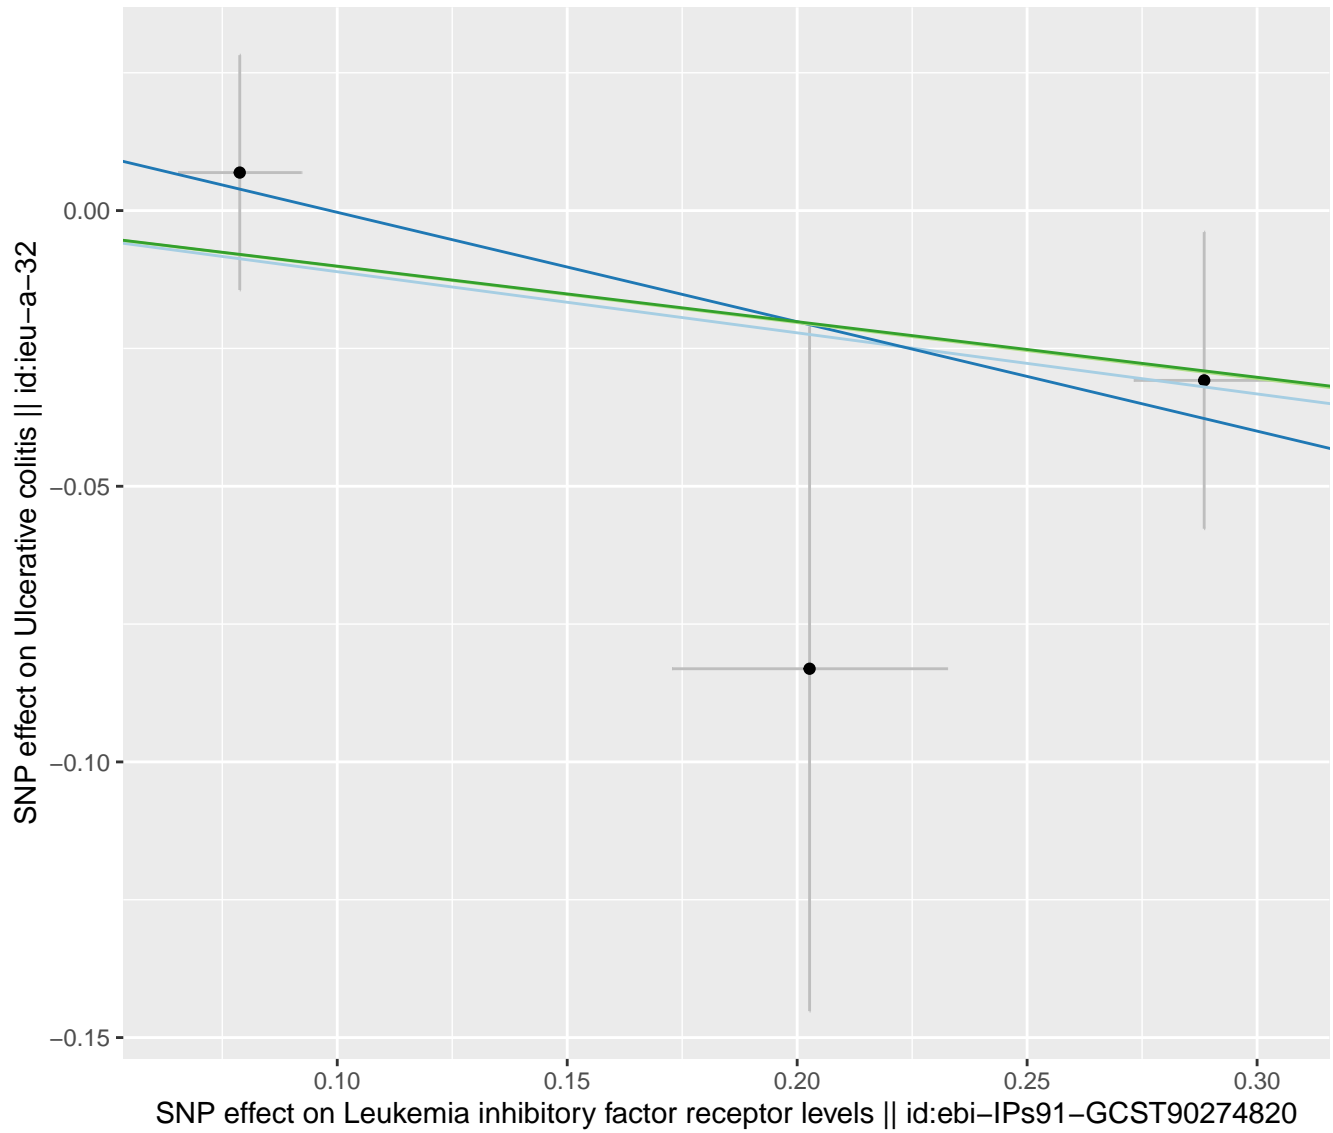



MR Test

- Inverse variance weighted
- MR Egger
- Weighted median
- Weighted mode

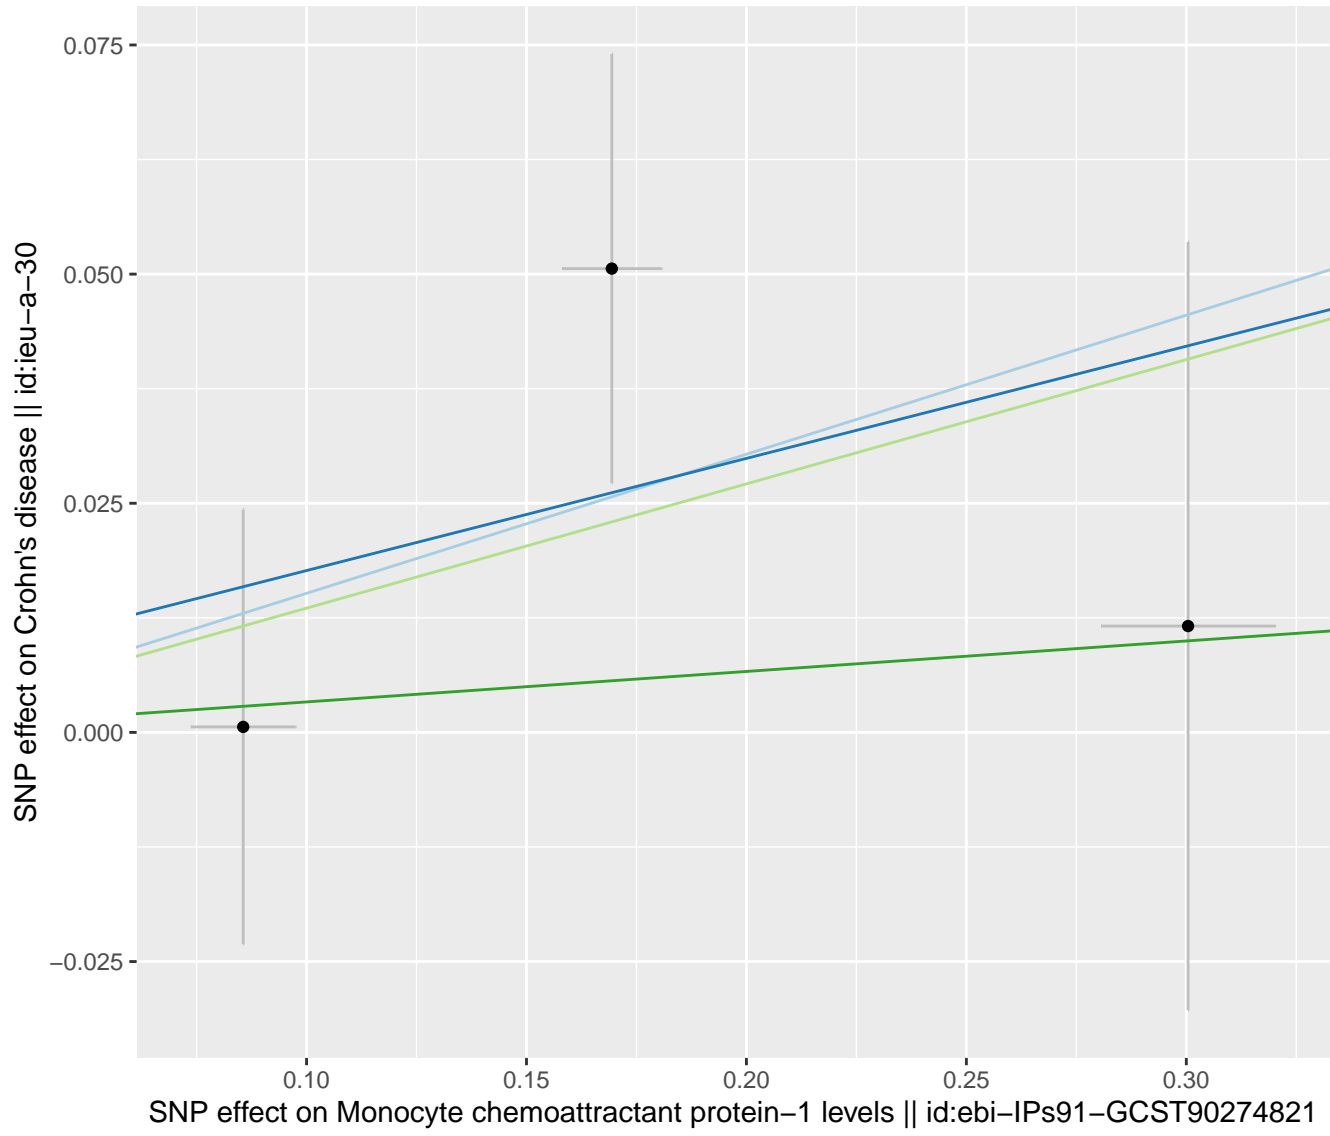

### MR Test

- Inverse variance weighted
- MR Egger
- Weighted median
- Weighted mode

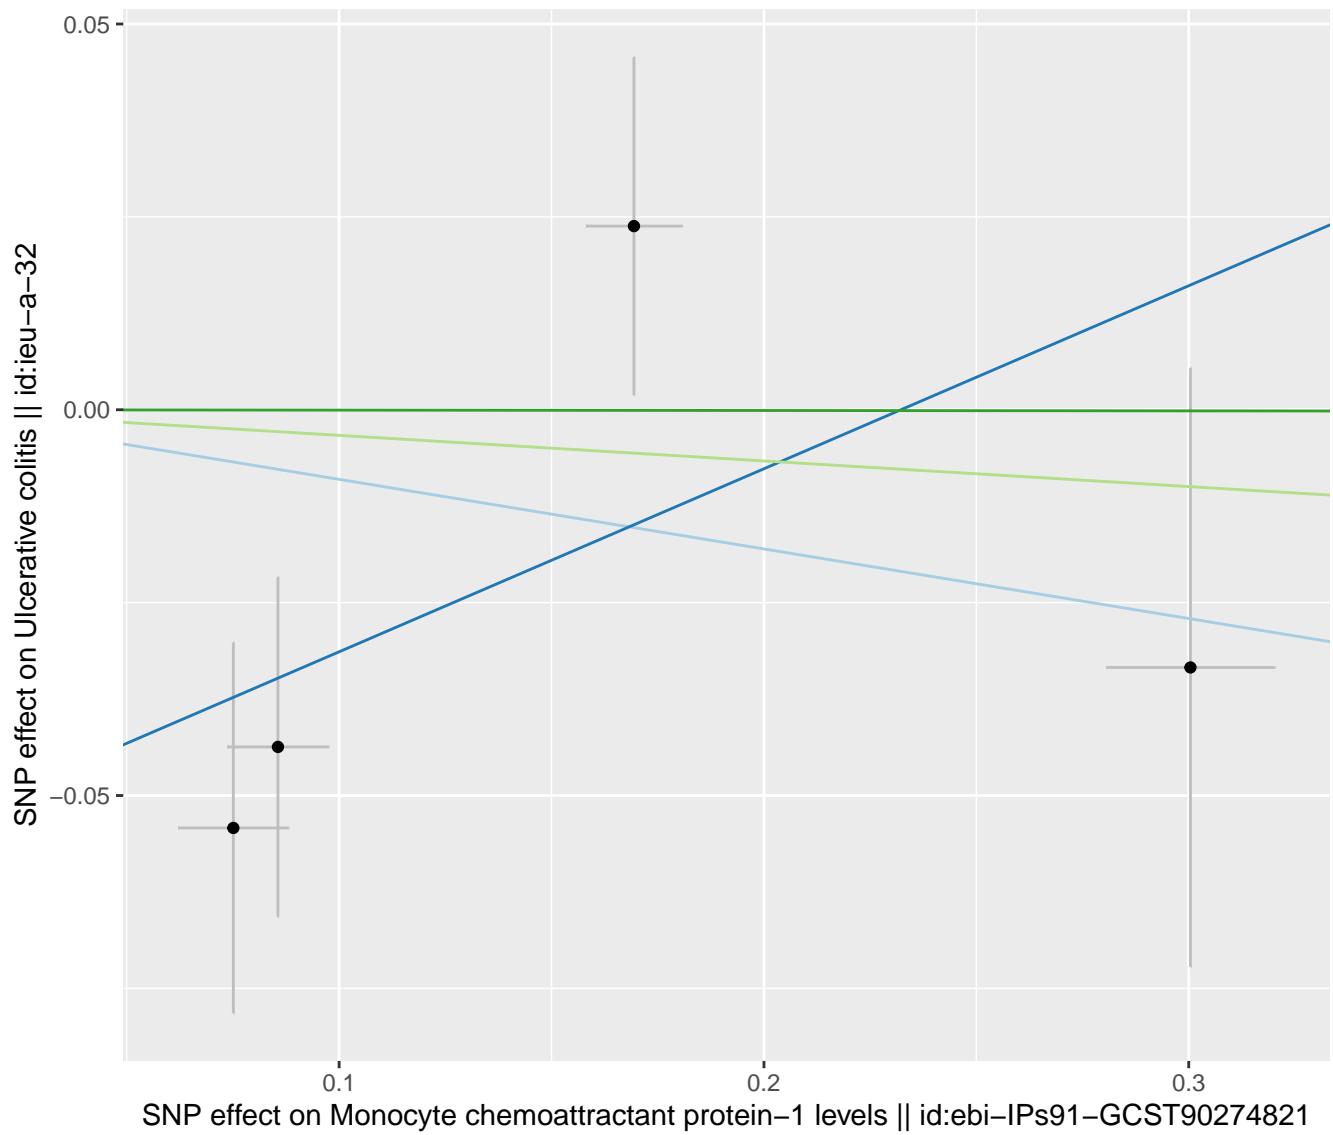

MR Test

- Inverse variance weighted
- MR Egger
- Weighted median
- Weighted mode

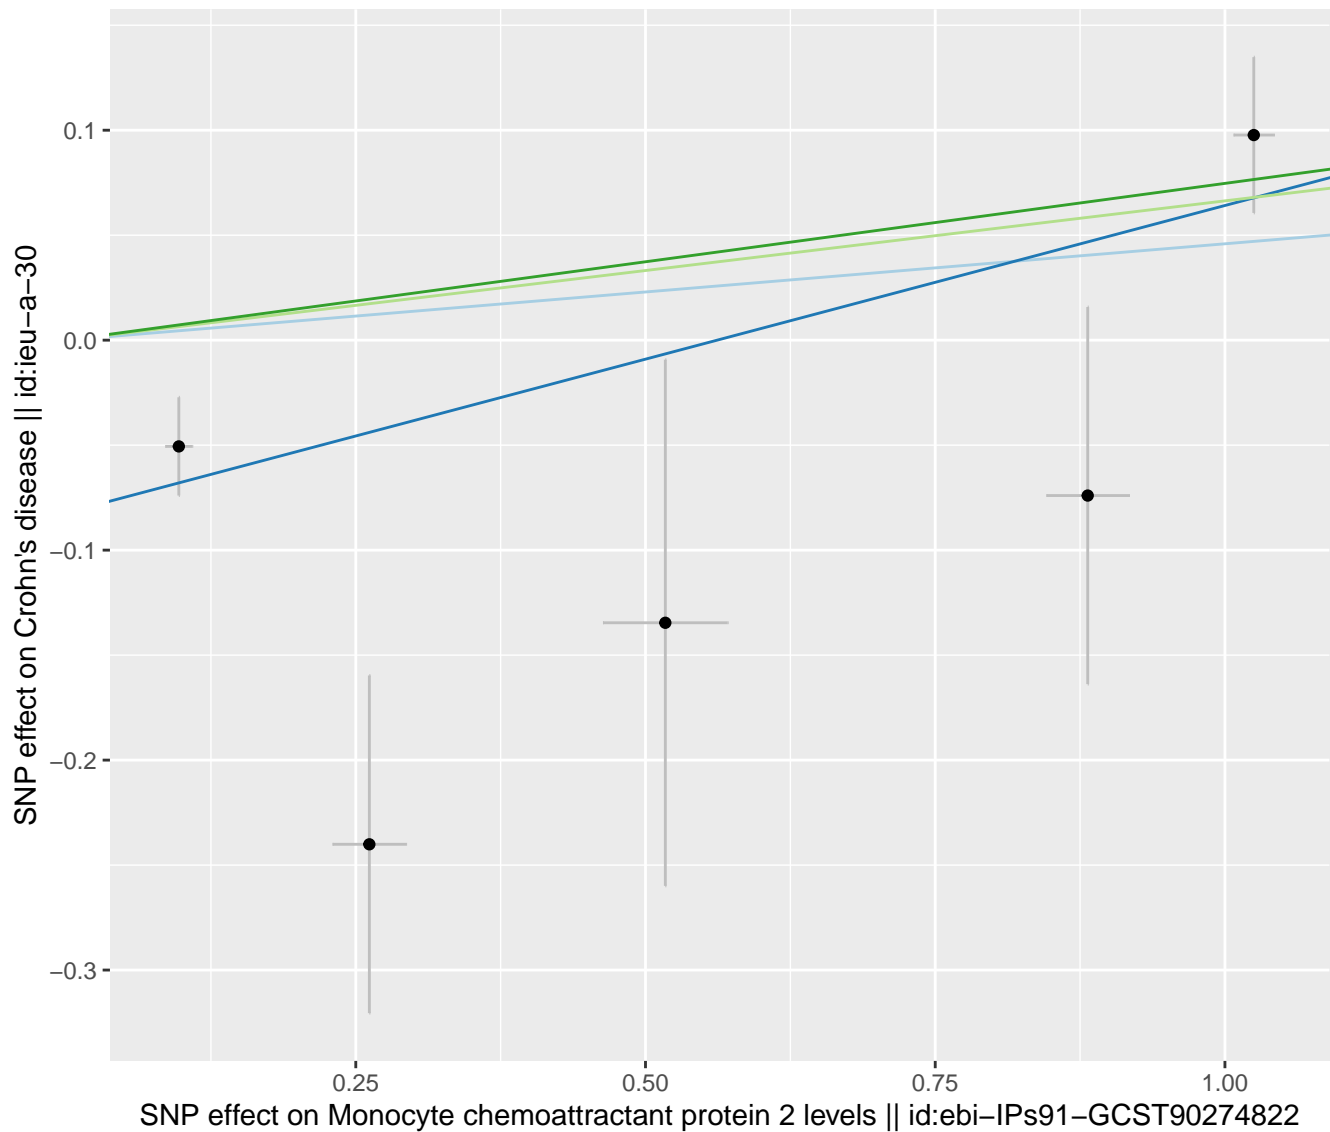

MR Test

- Inverse variance weighted
- MR Egger
- Weighted median
- Weighted mode

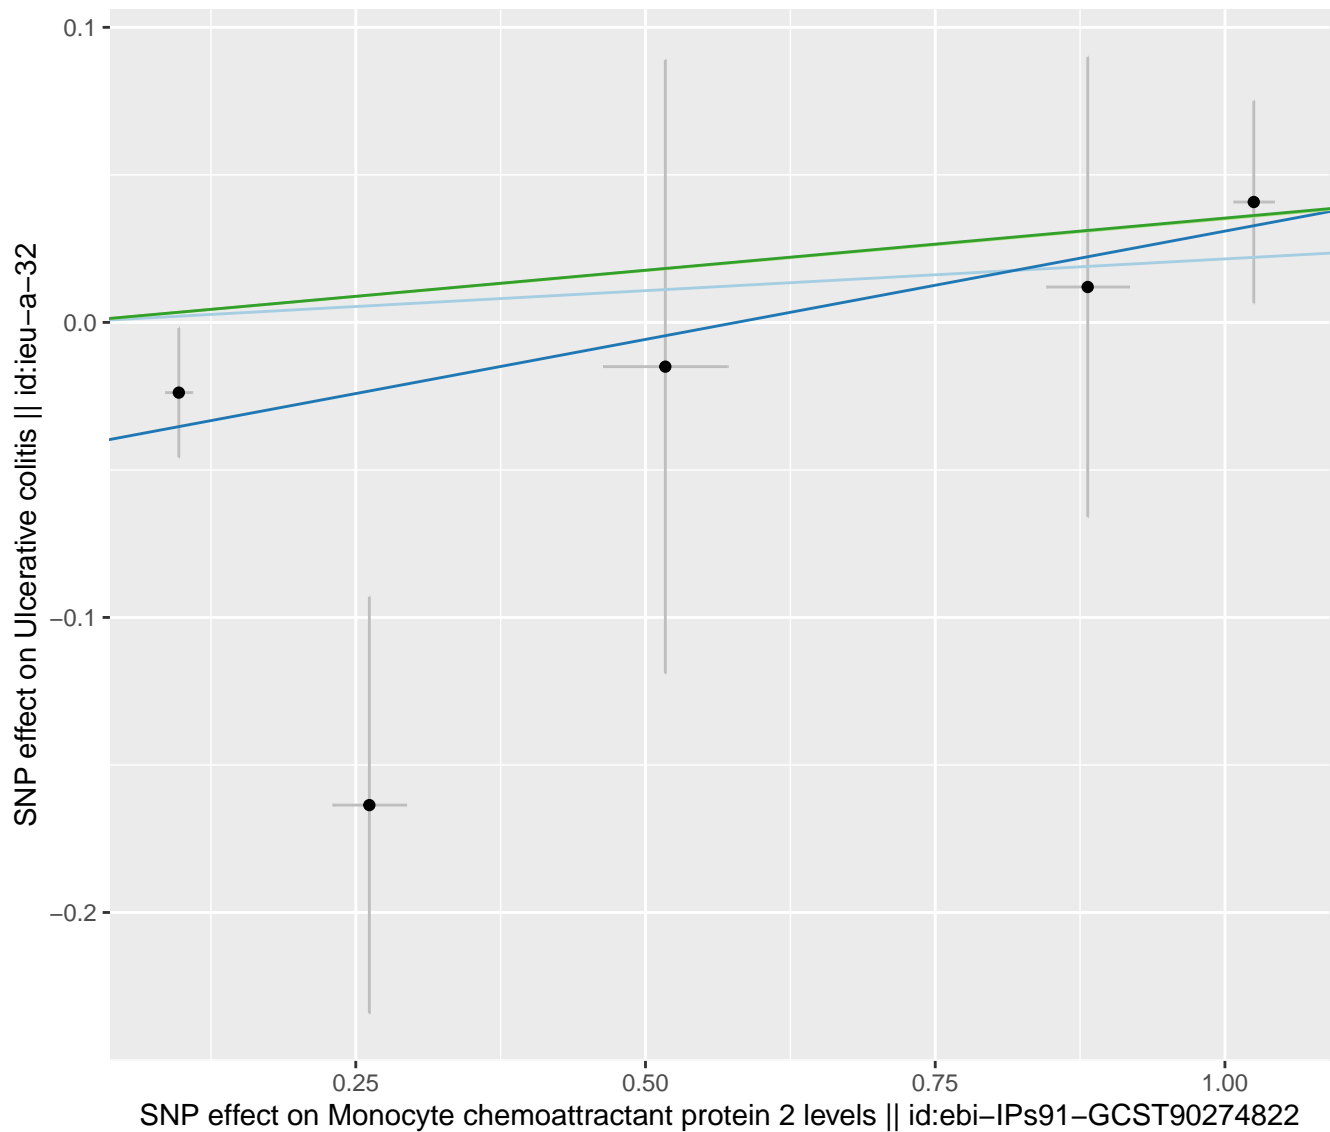

### MR Test

- Inverse variance weighted
- MR Egger
- Weighted median
- Weighted mode

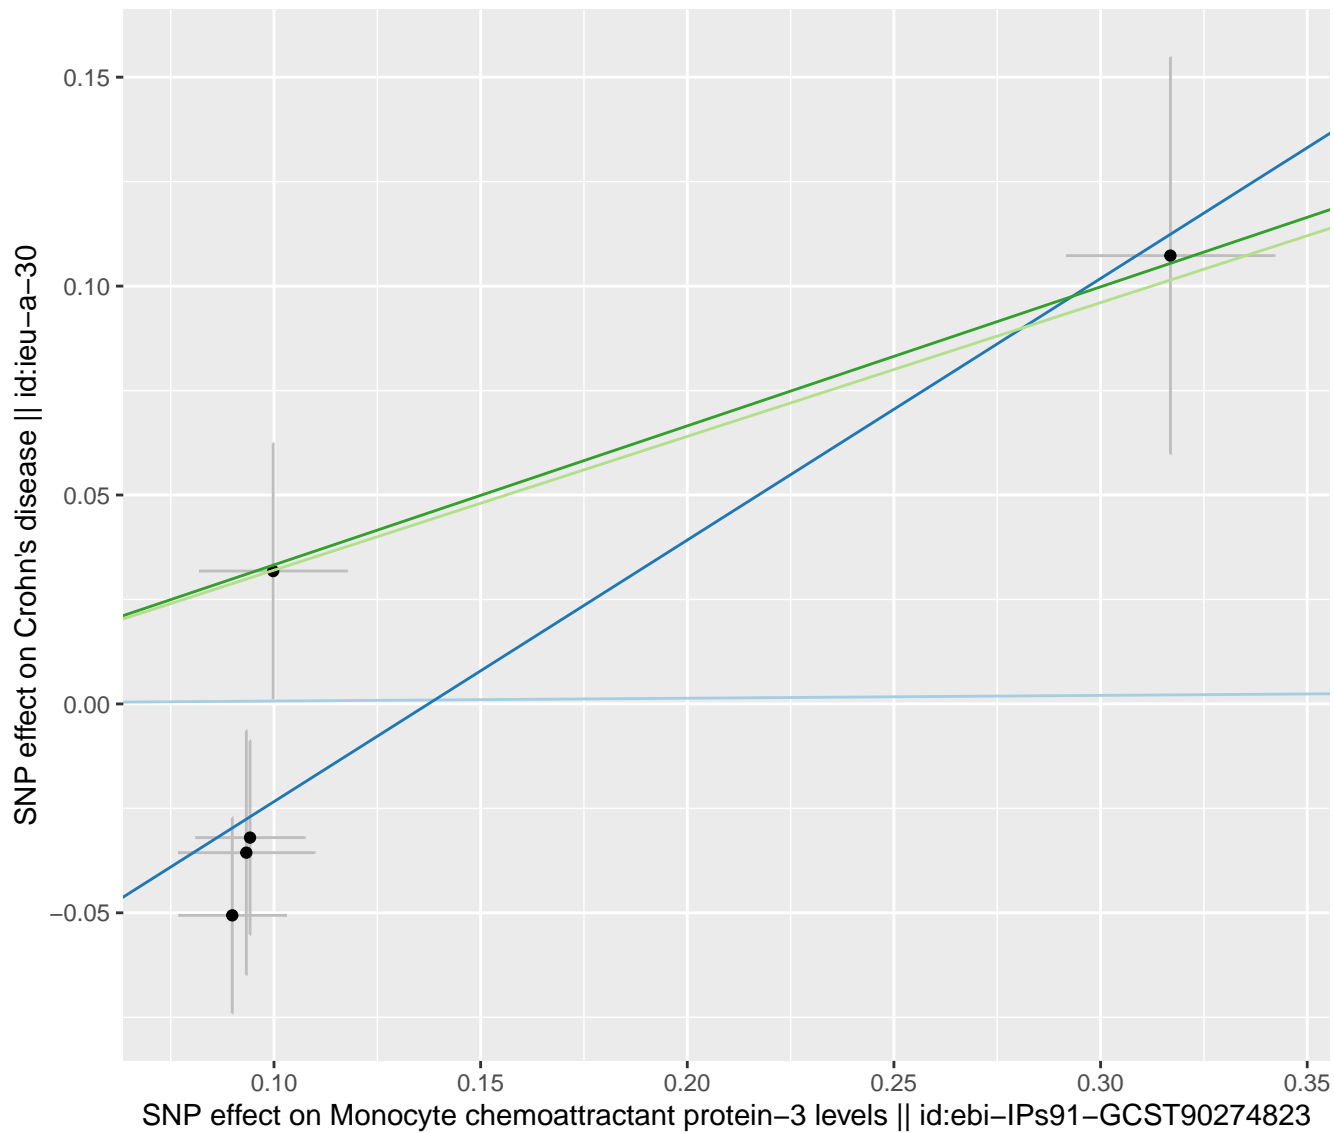

MR Test

- Inverse variance weighted
- MR Egger
- Weighted median
- Weighted mode

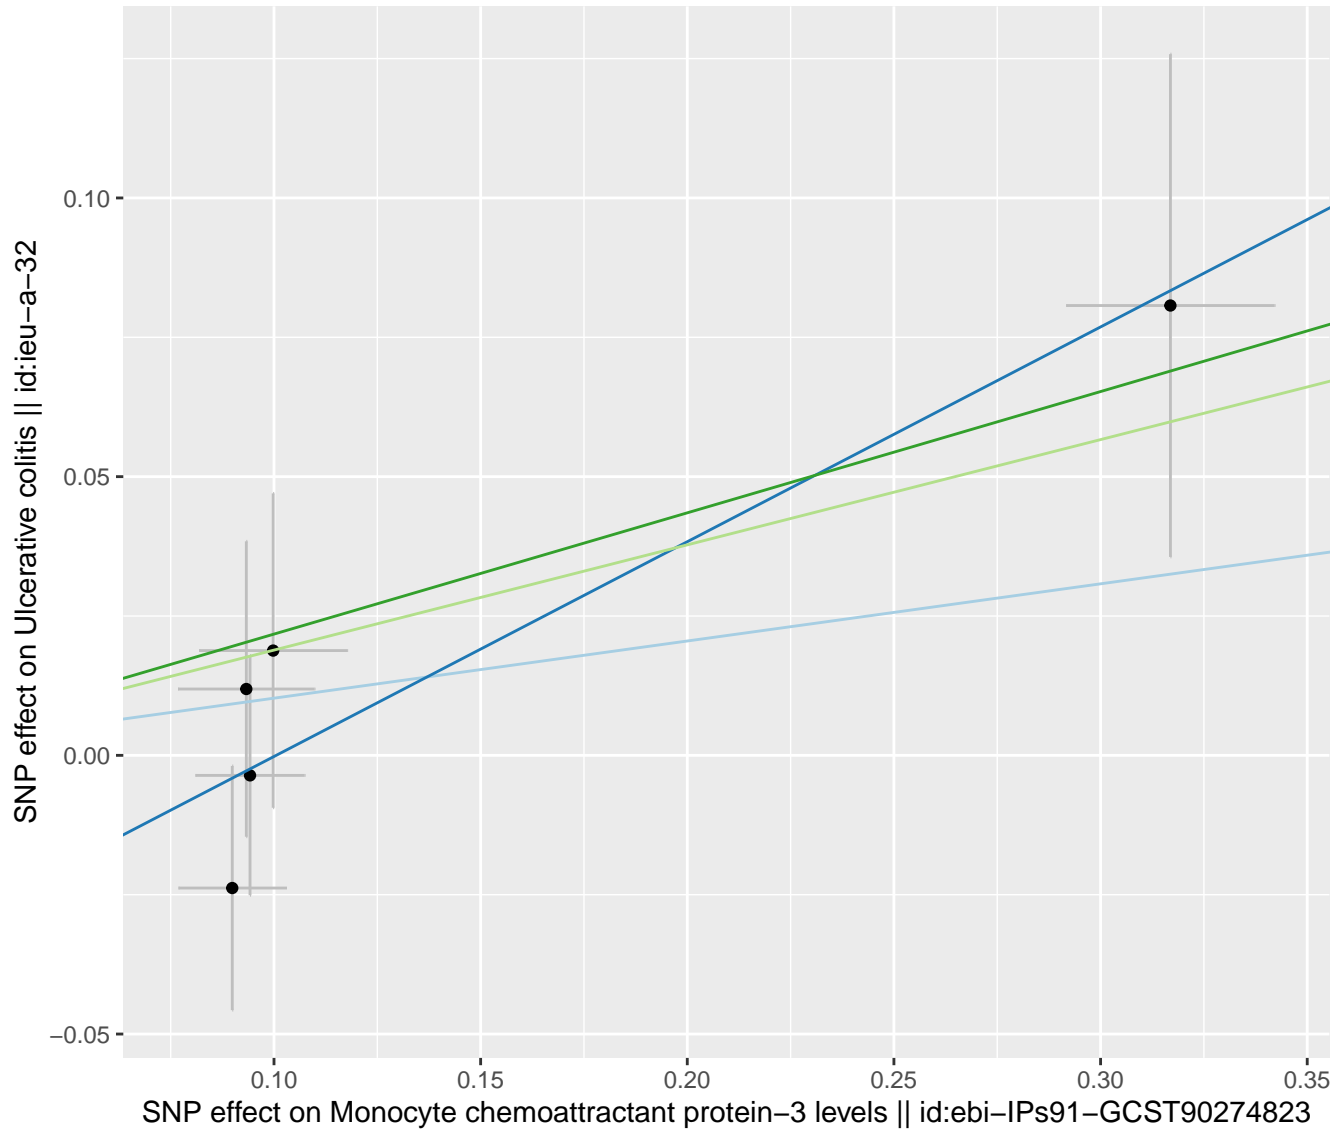

MR Test

- Inverse variance weighted
- MR Egger
- Weighted median
- Weighted mode

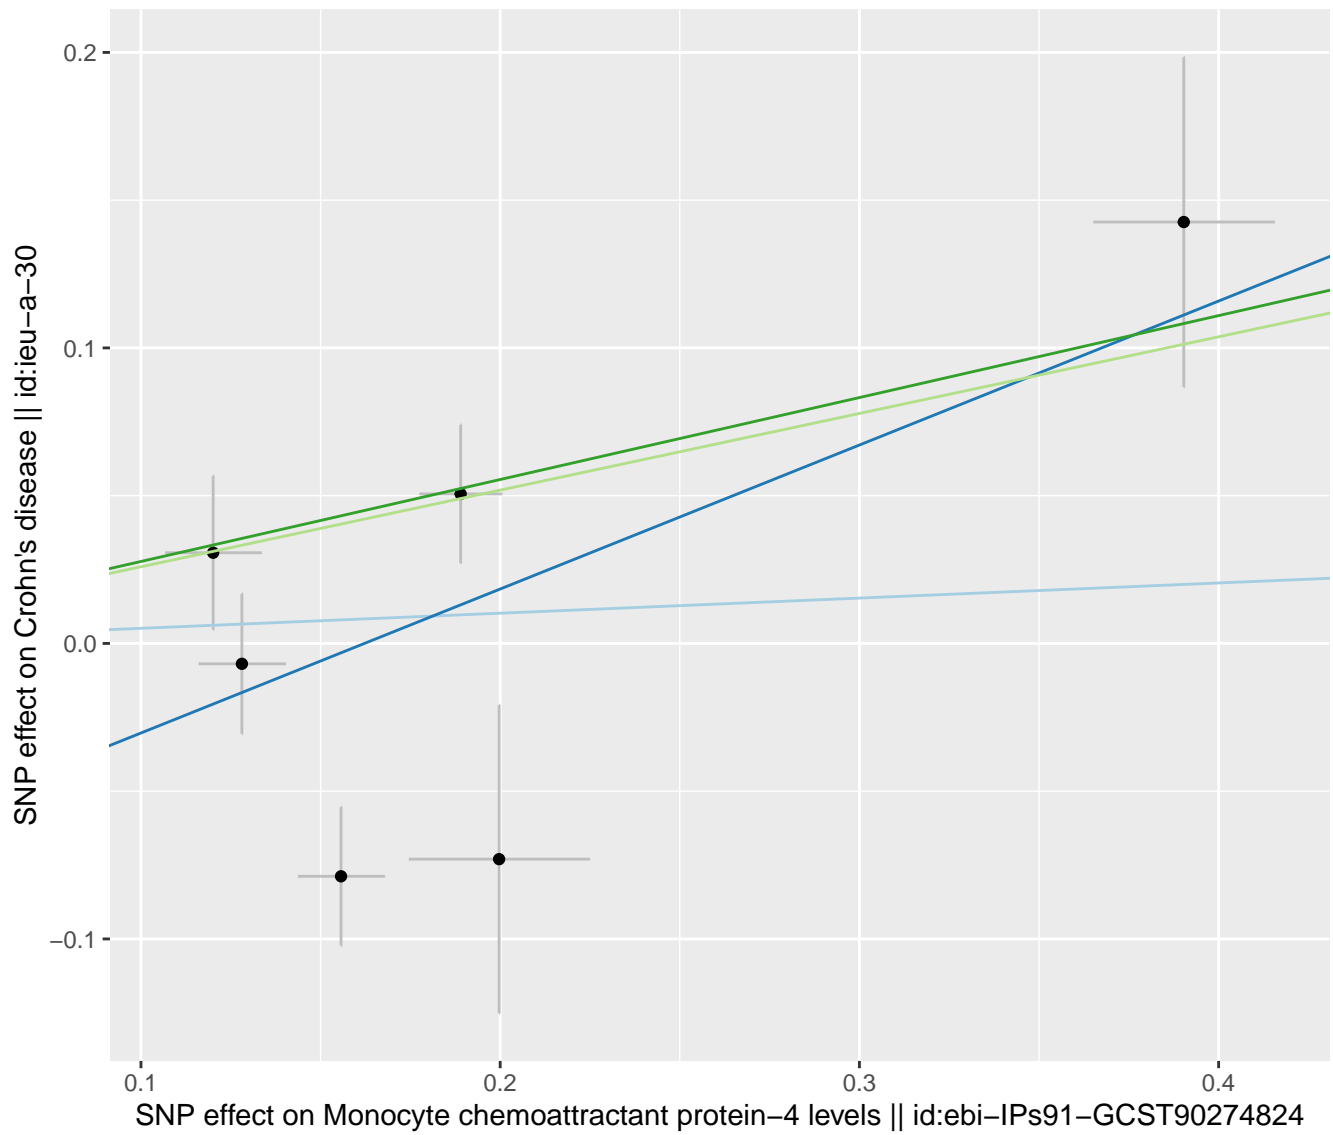

MR Test

- Inverse variance weighted
- MR Egger
- Weighted median
- Weighted mode

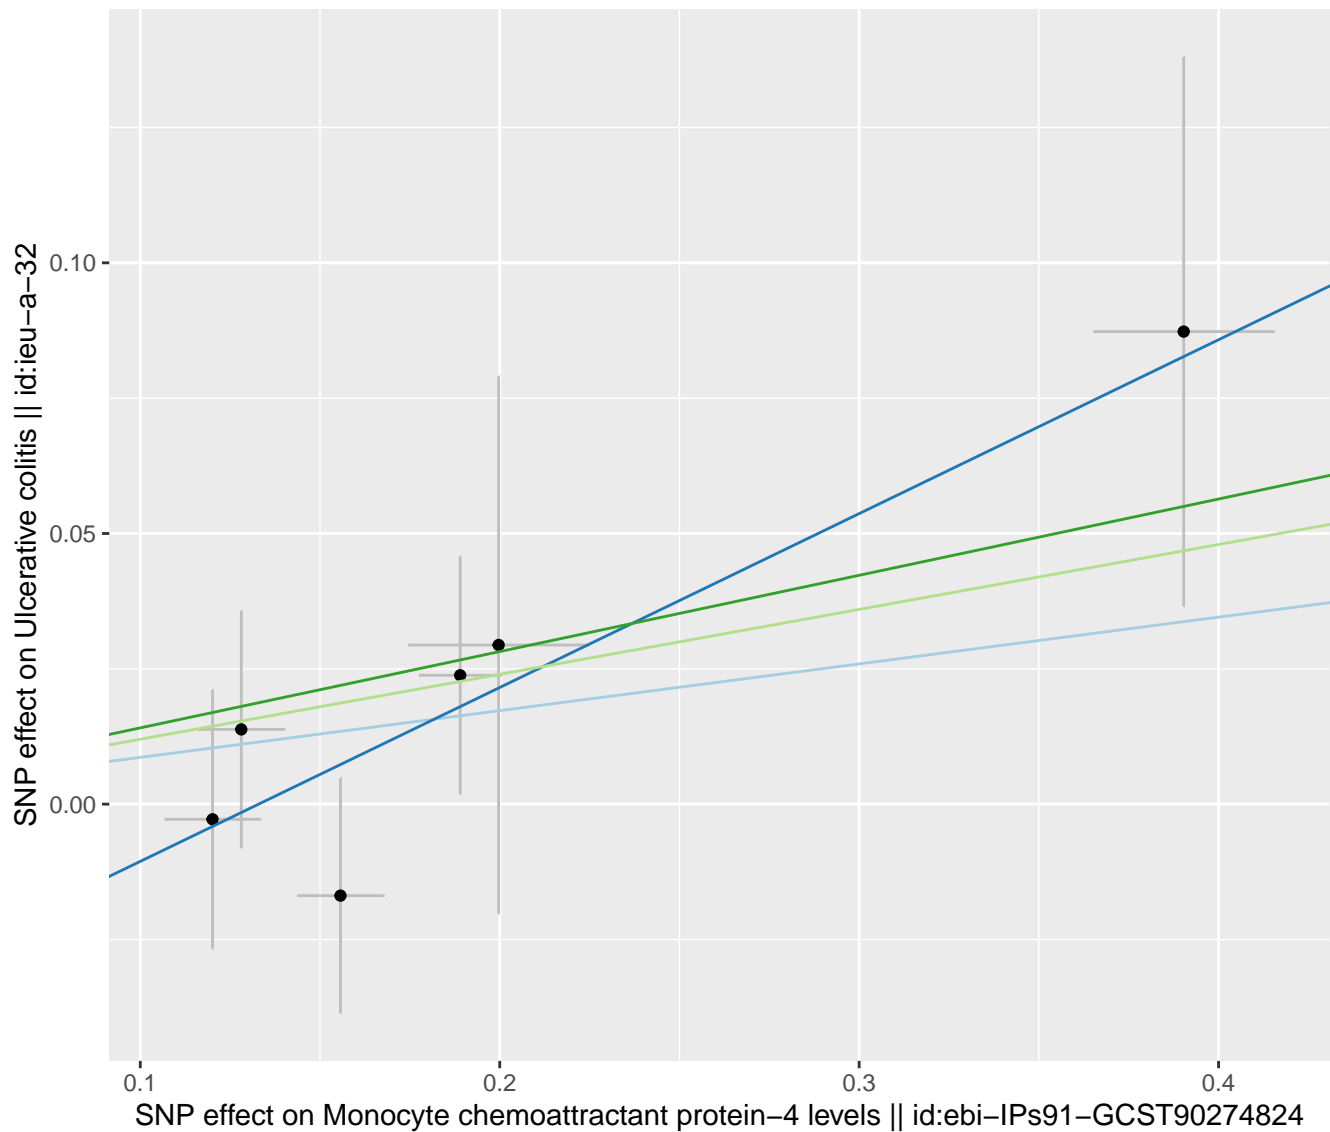



MR Test

- Inverse variance weighted
- MR Egger
- Weighted median
- Weighted mode

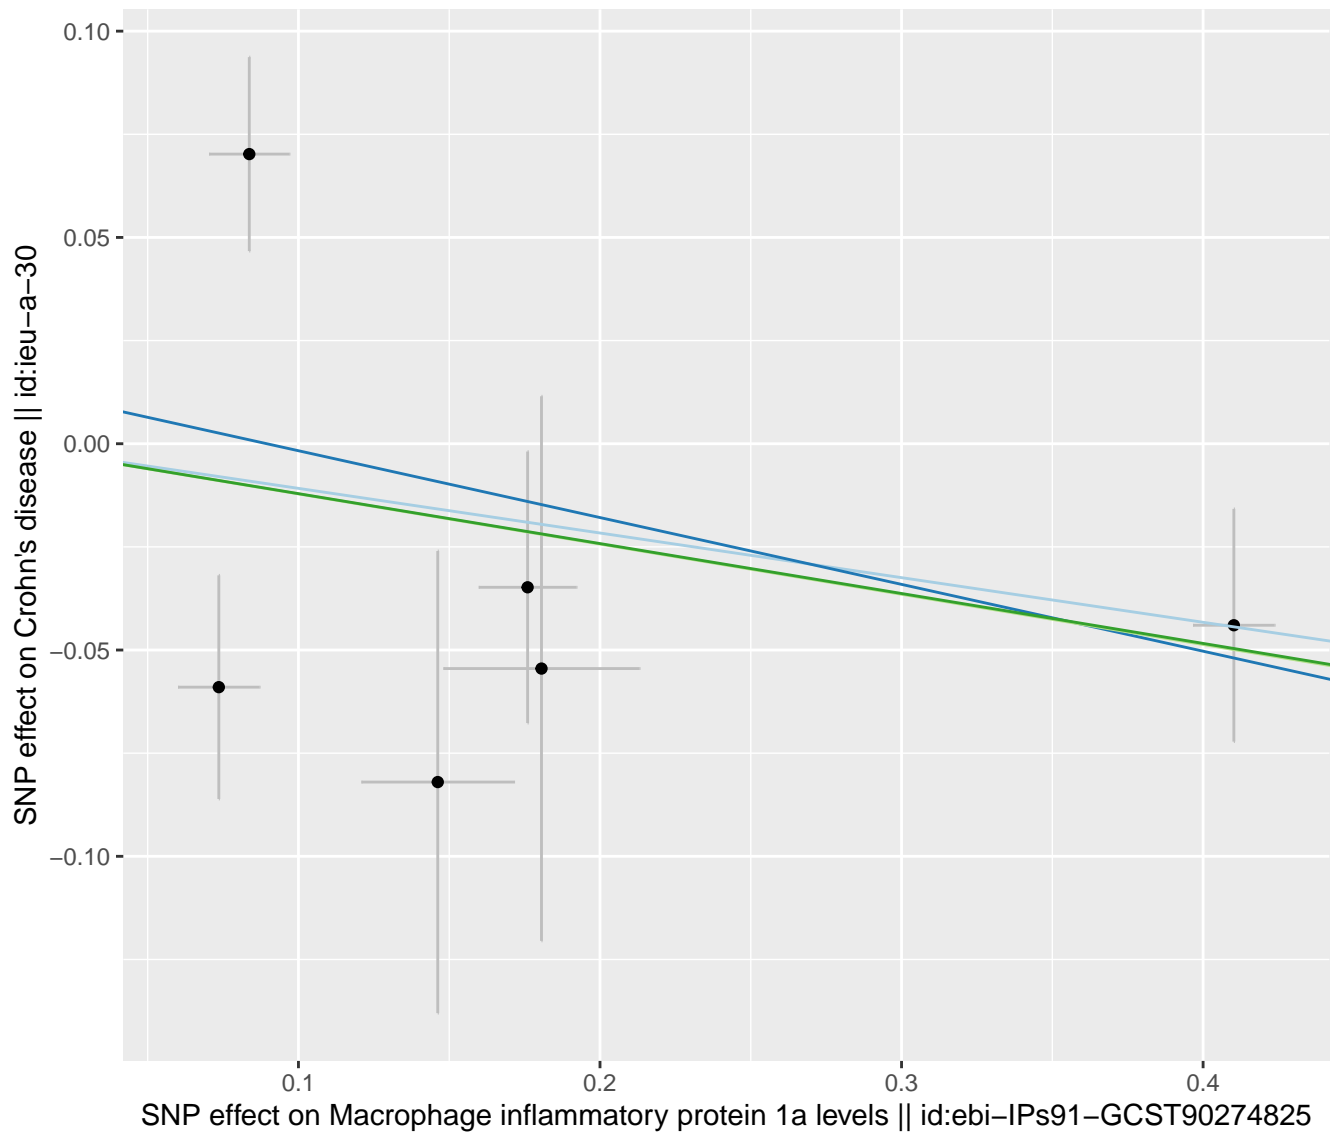

### MR Test

- Inverse variance weighted
- MR Egger
- Weighted median
- Weighted mode

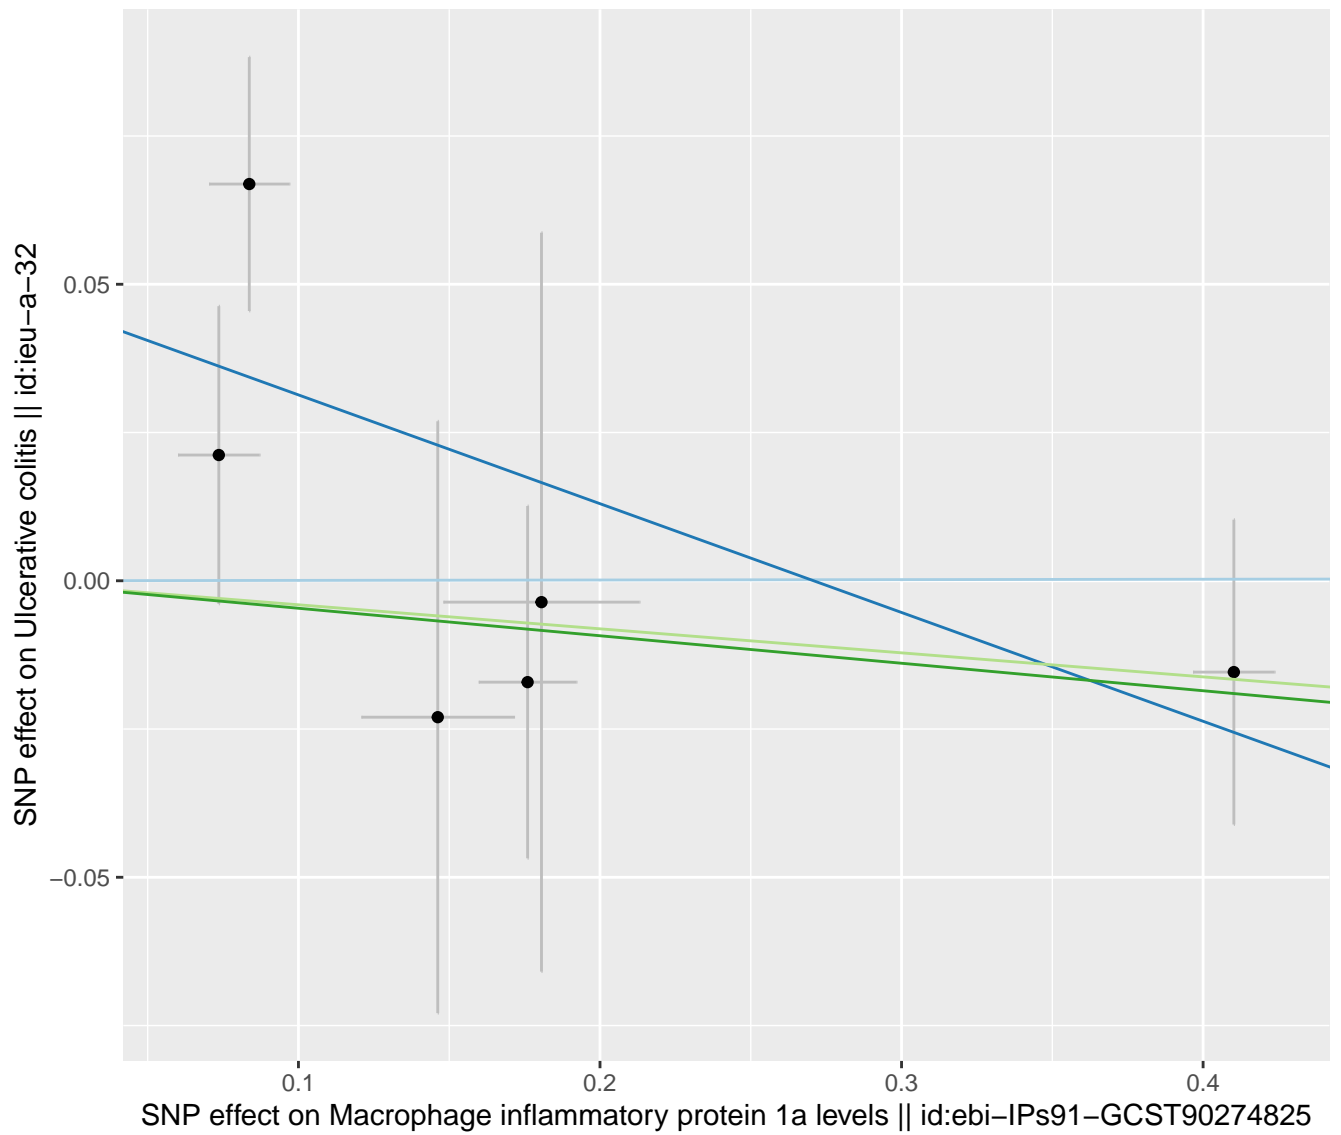

MR Test

- Inverse variance weighted
- MR Egger
- Weighted median
- Weighted mode

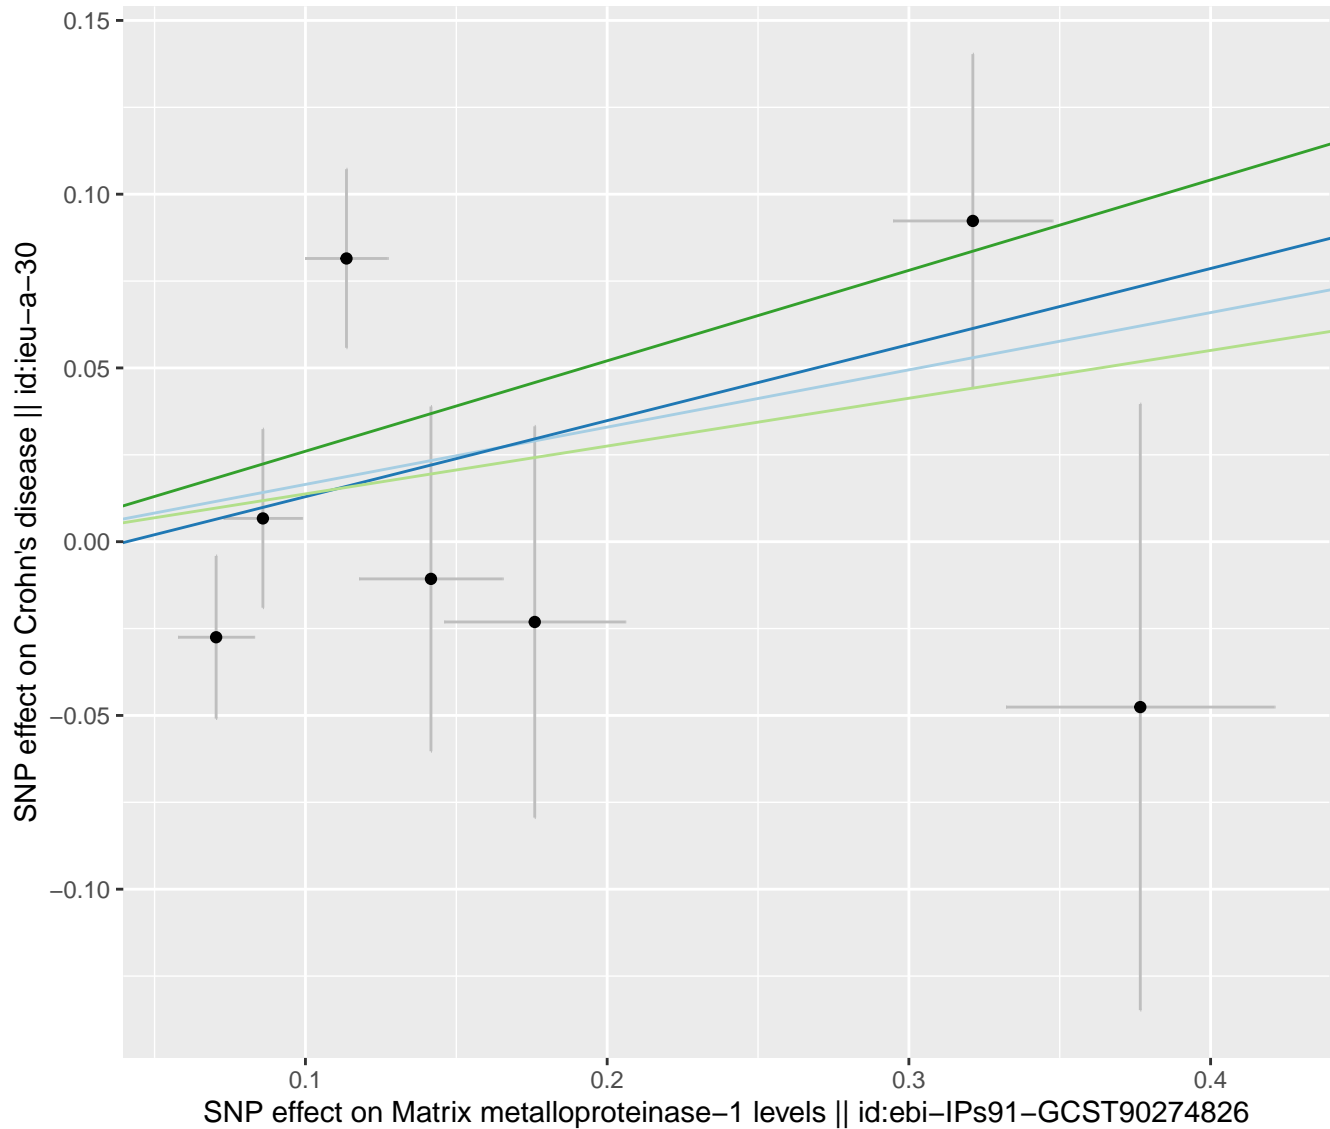

MR Test

- Inverse variance weighted
- MR Egger
- Weighted median
- Weighted mode

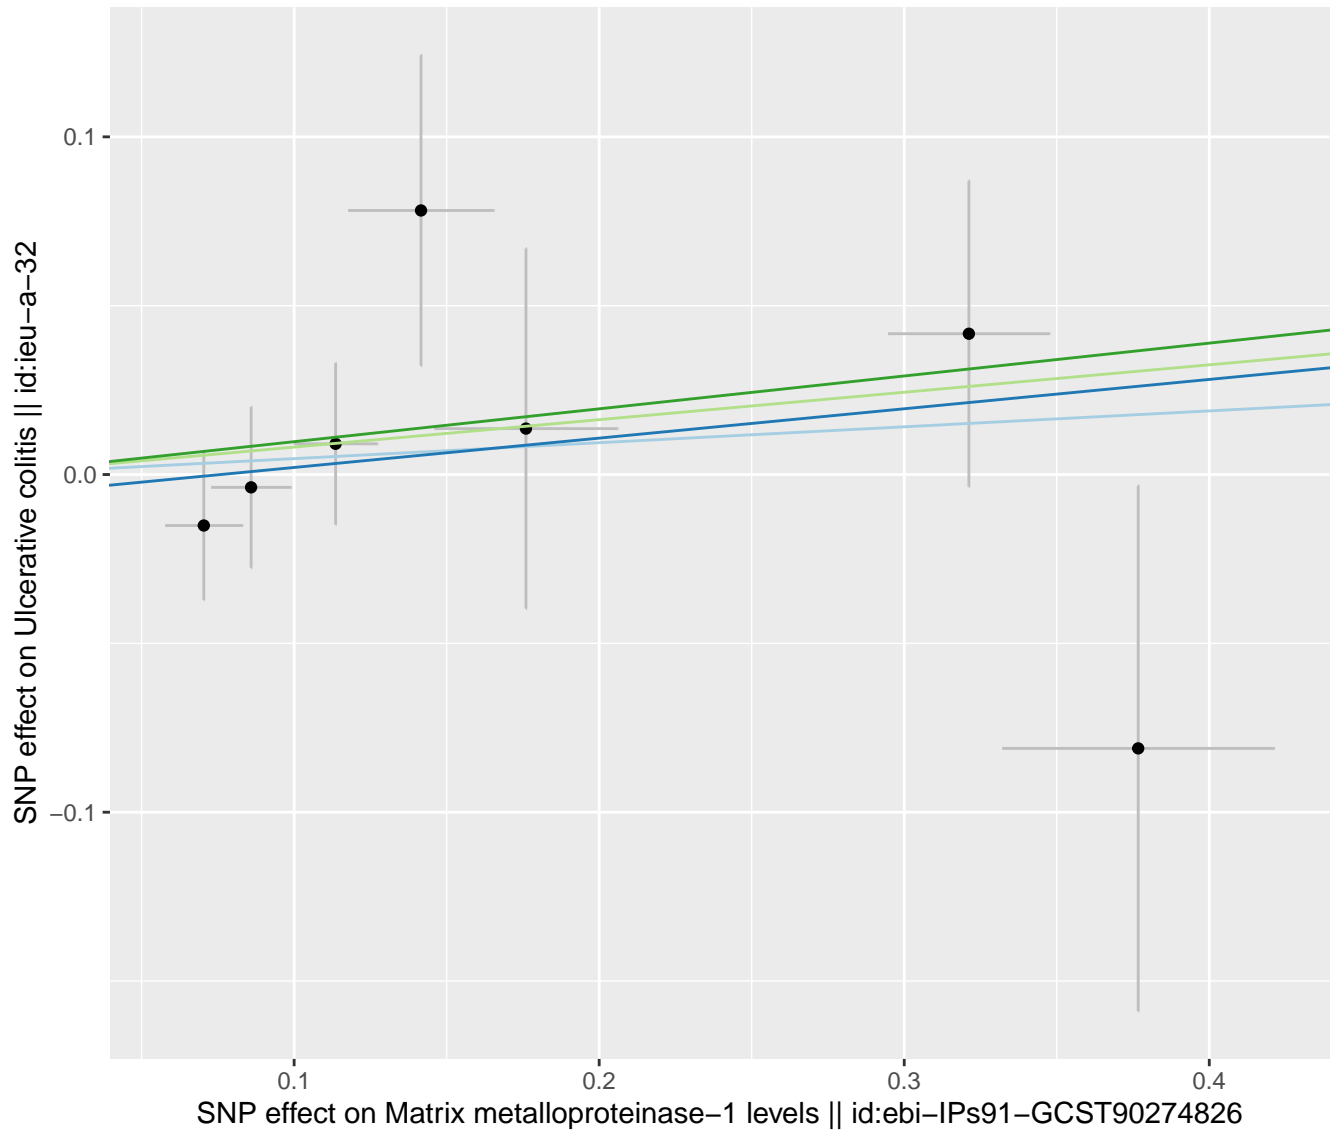

MR Test

- Inverse variance weighted
- MR Egger
- Weighted median
- Weighted mode

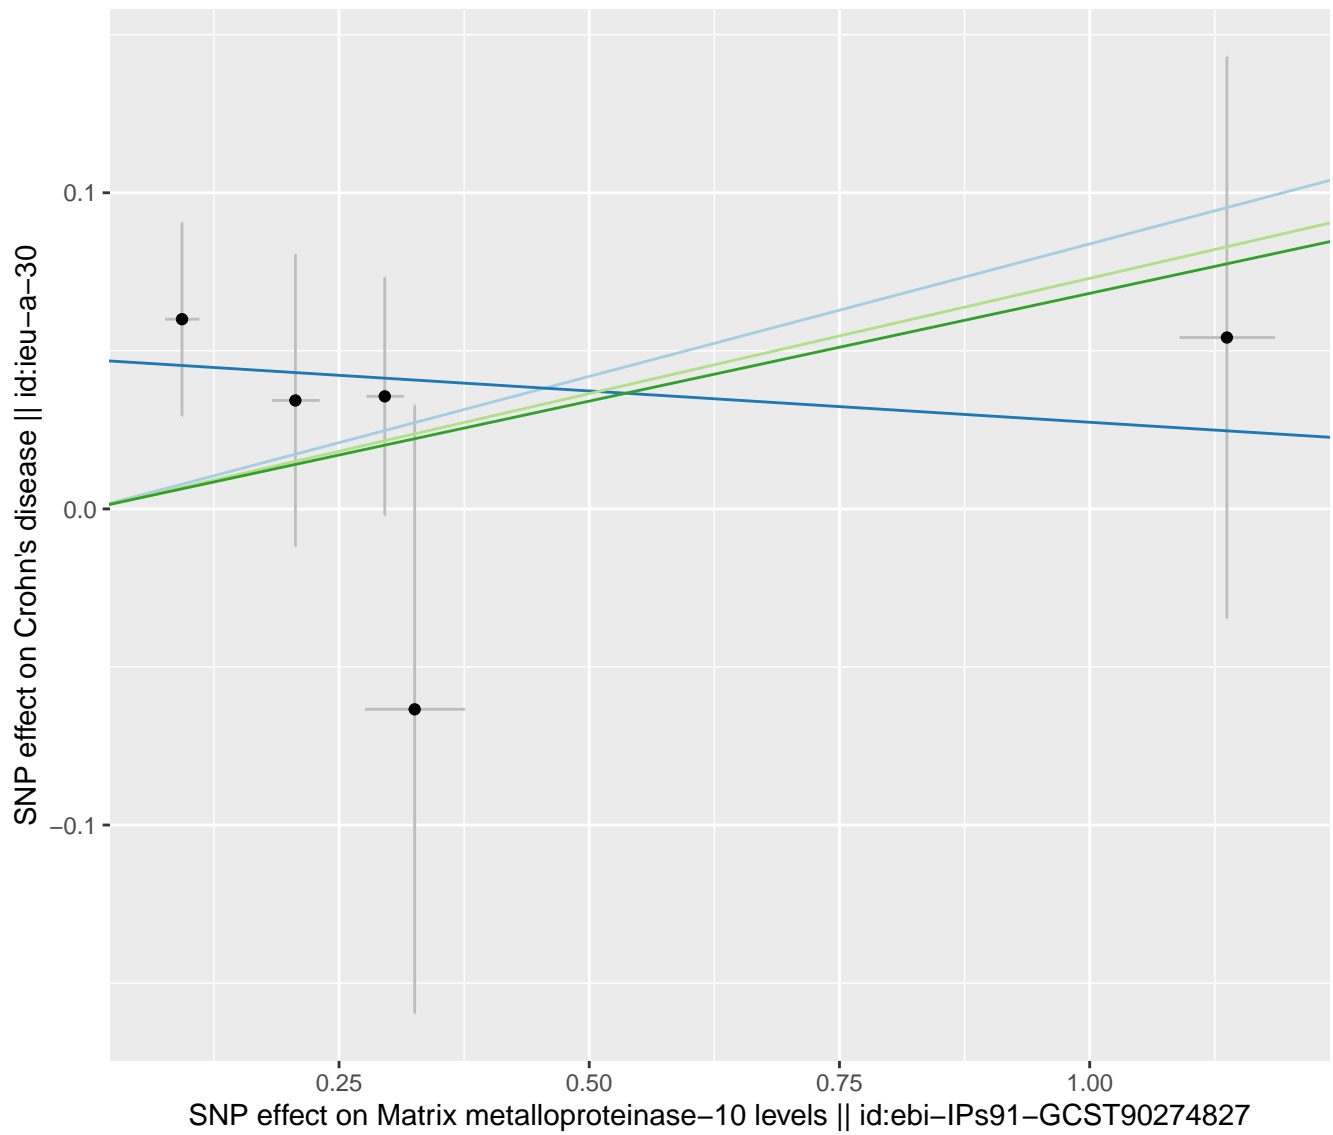

MR Test

- Inverse variance weighted
- MR Egger
- Weighted median
- Weighted mode

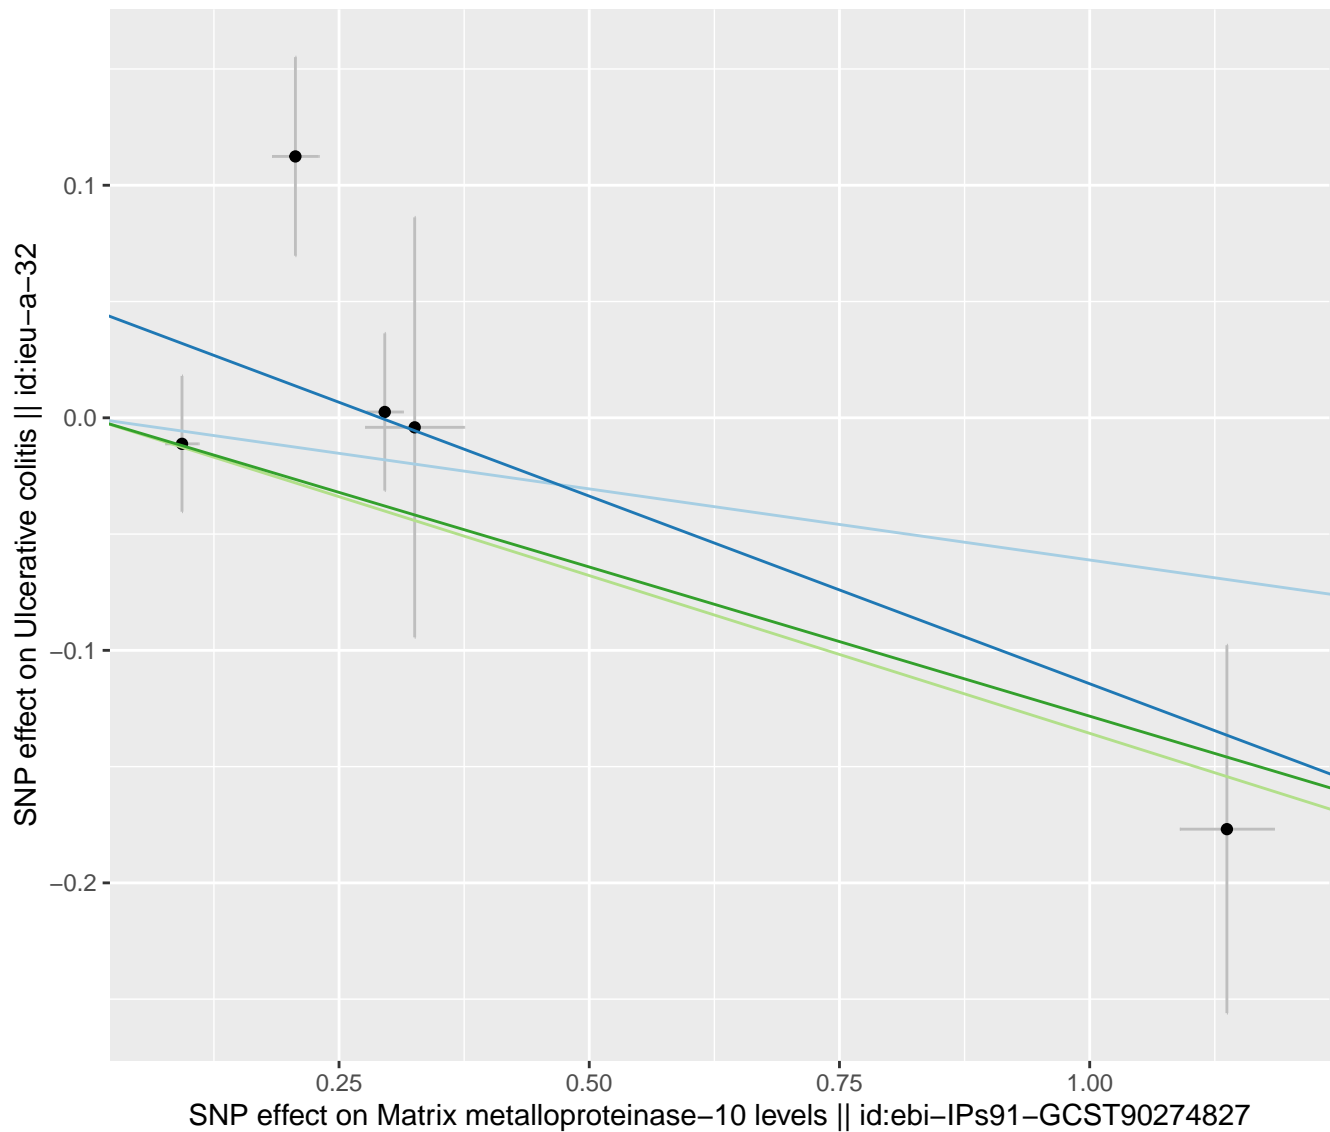

### MR Test

Inverse variance weighted

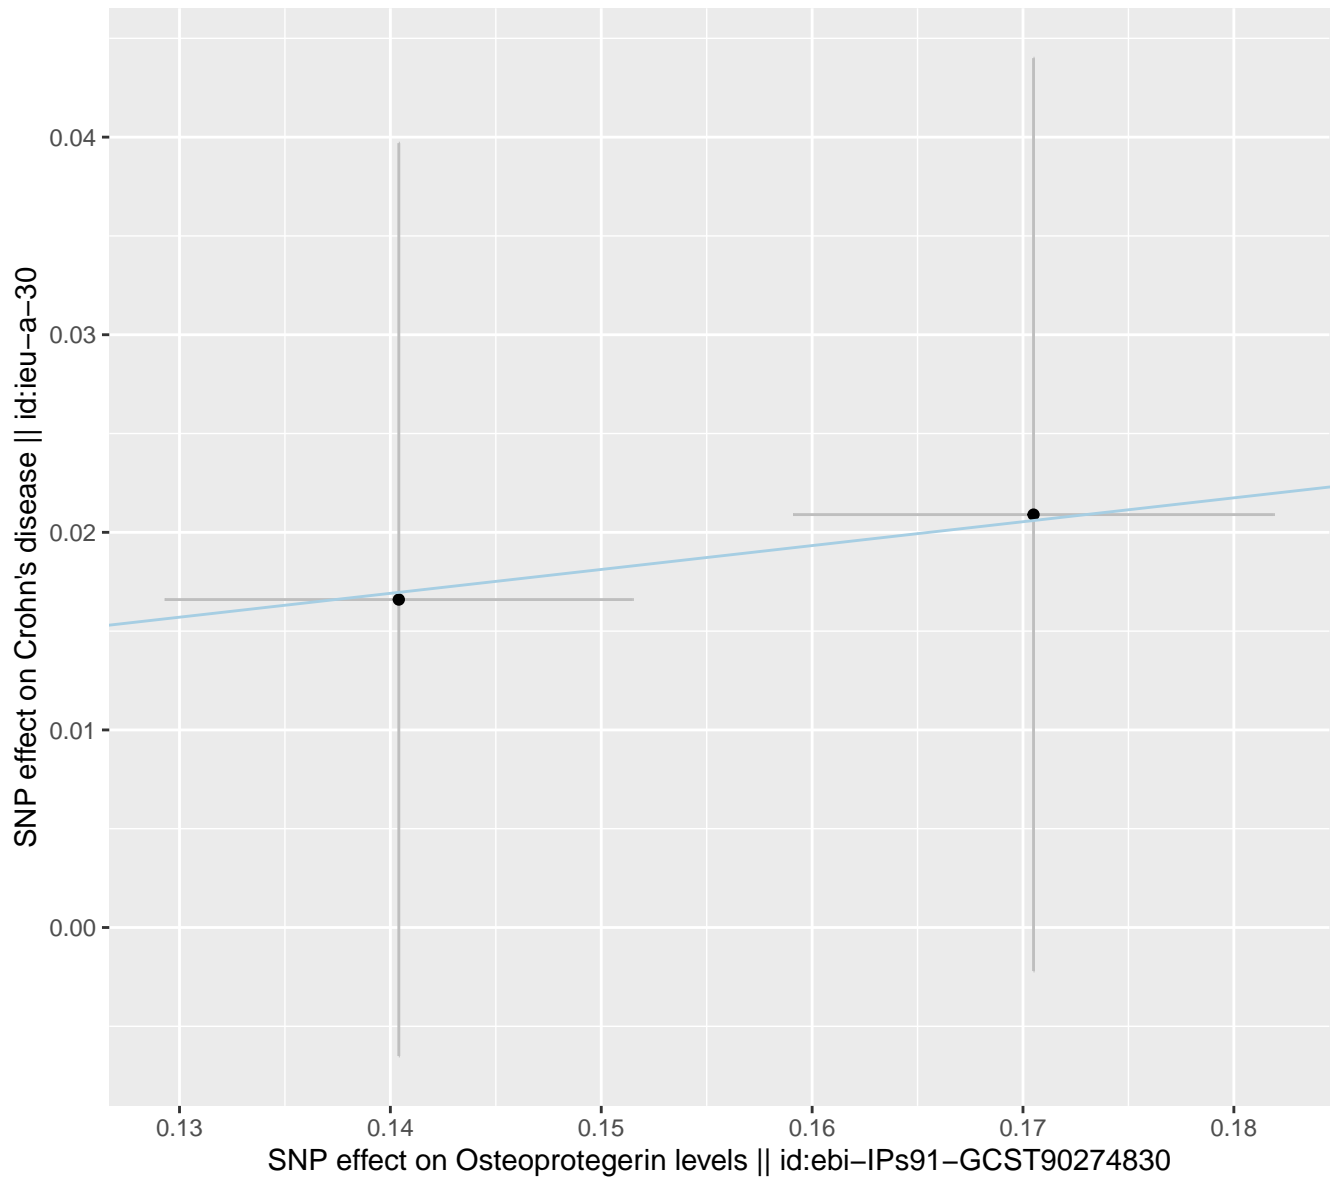

### MR Test

Inverse variance weighted

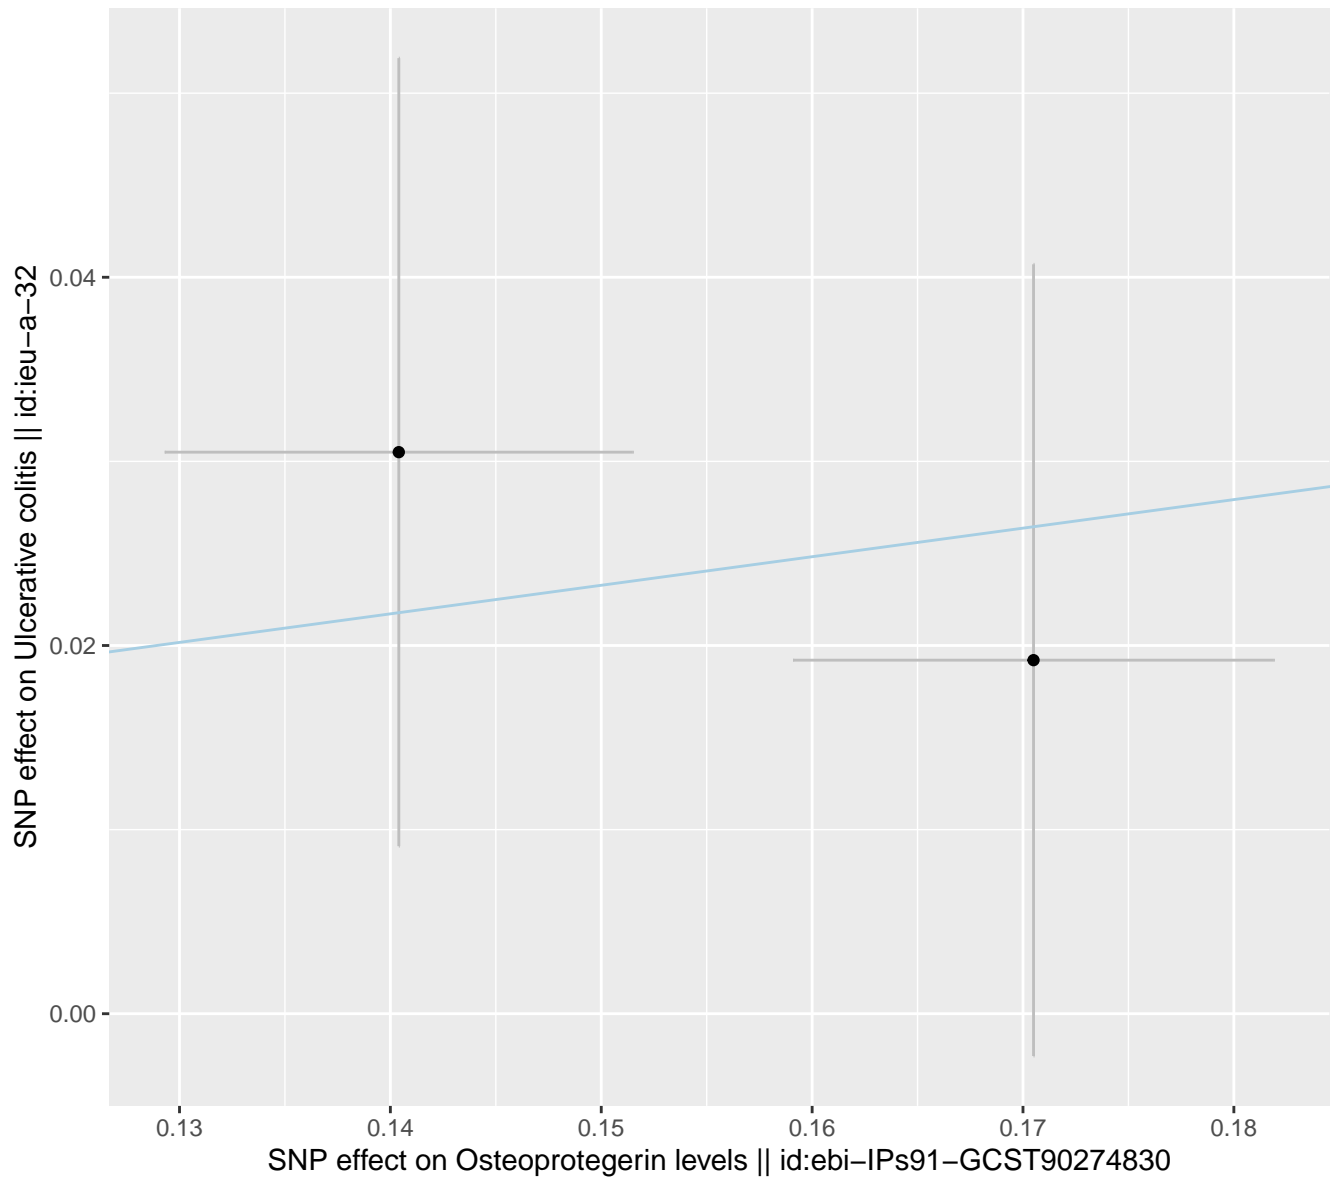



# MR Test

Inverse variance weighted

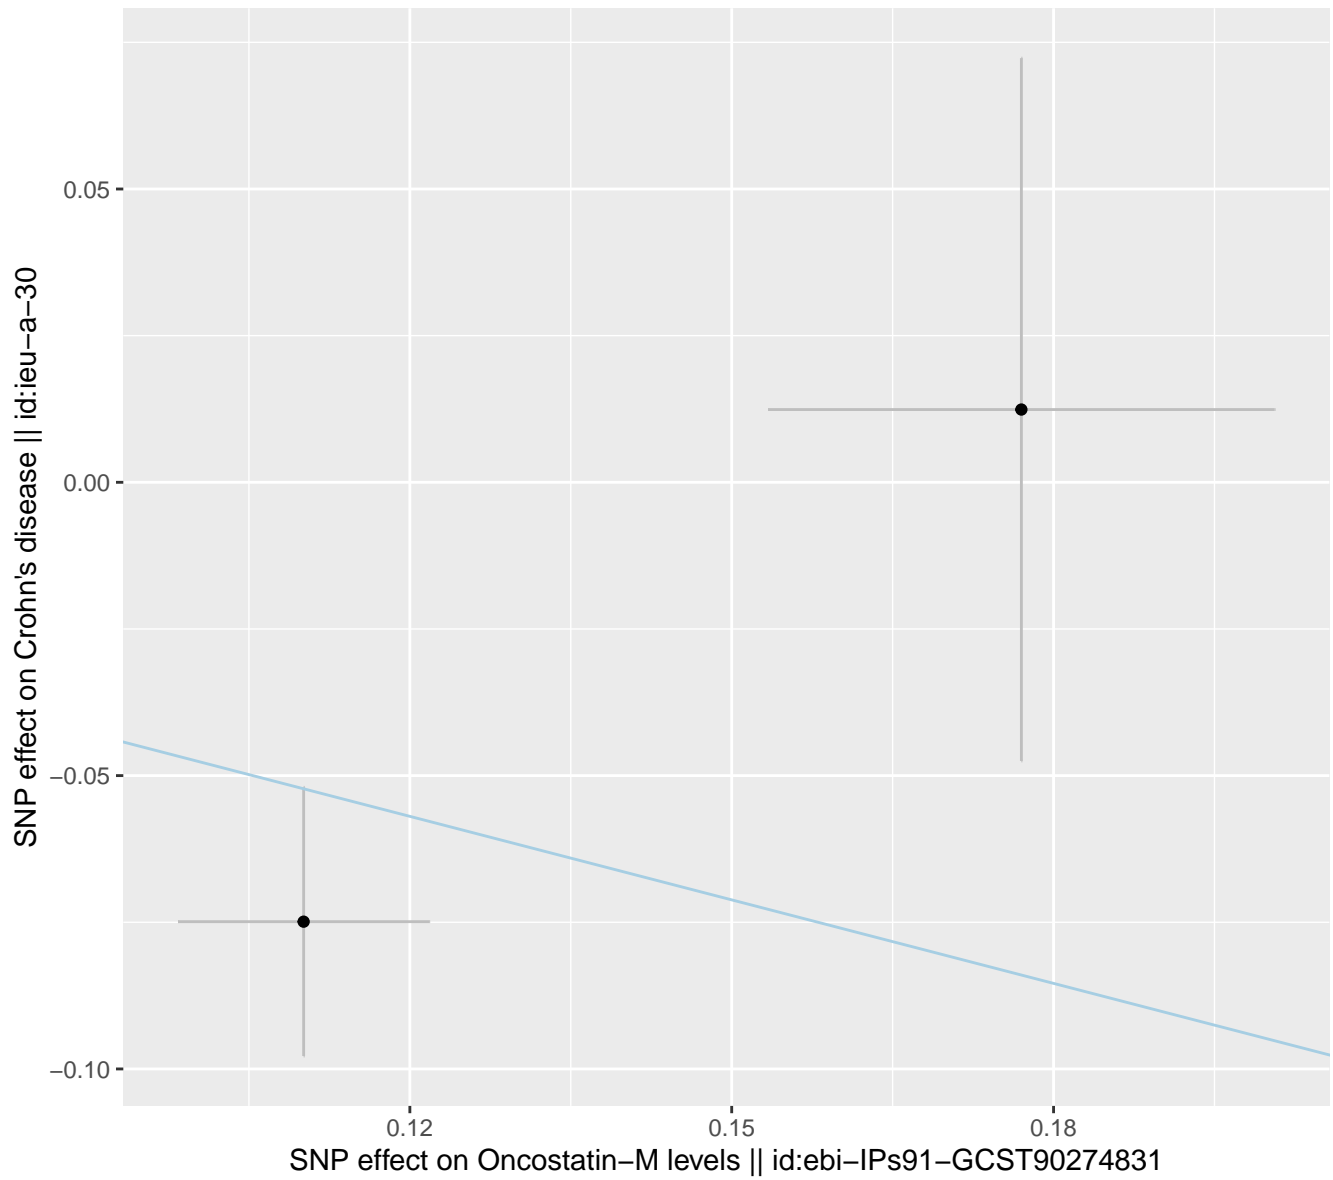

MR Test

Inverse variance weighted

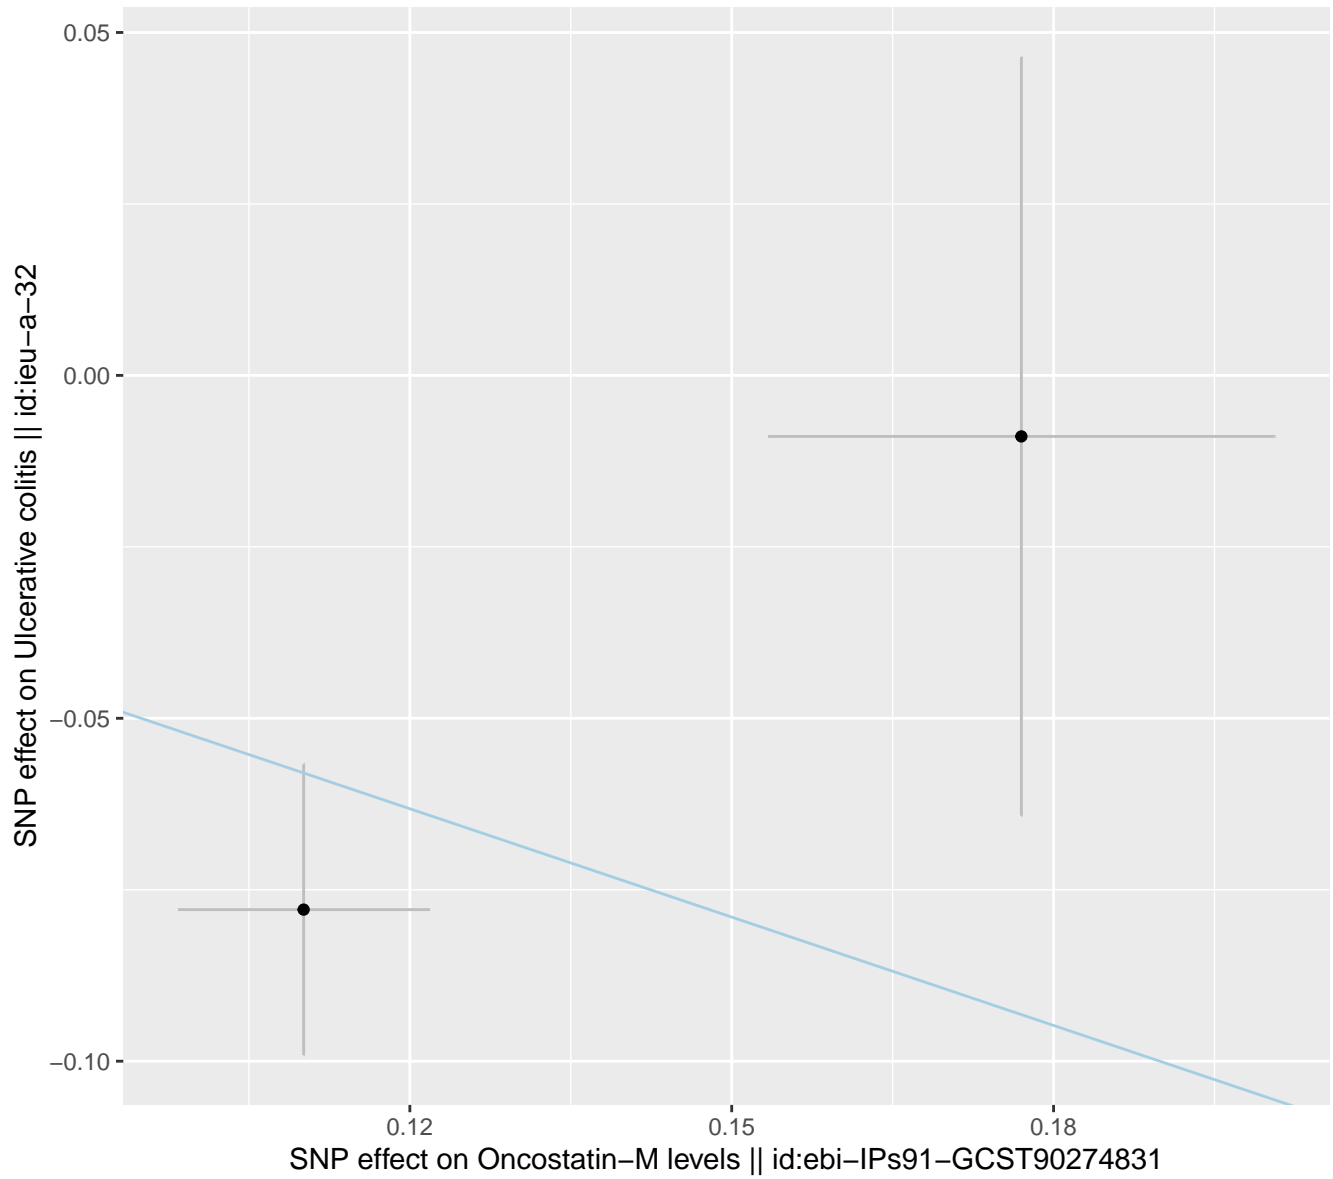

MR Test

- Inverse variance weighted
- MR Egger
- Weighted median
- Weighted mode

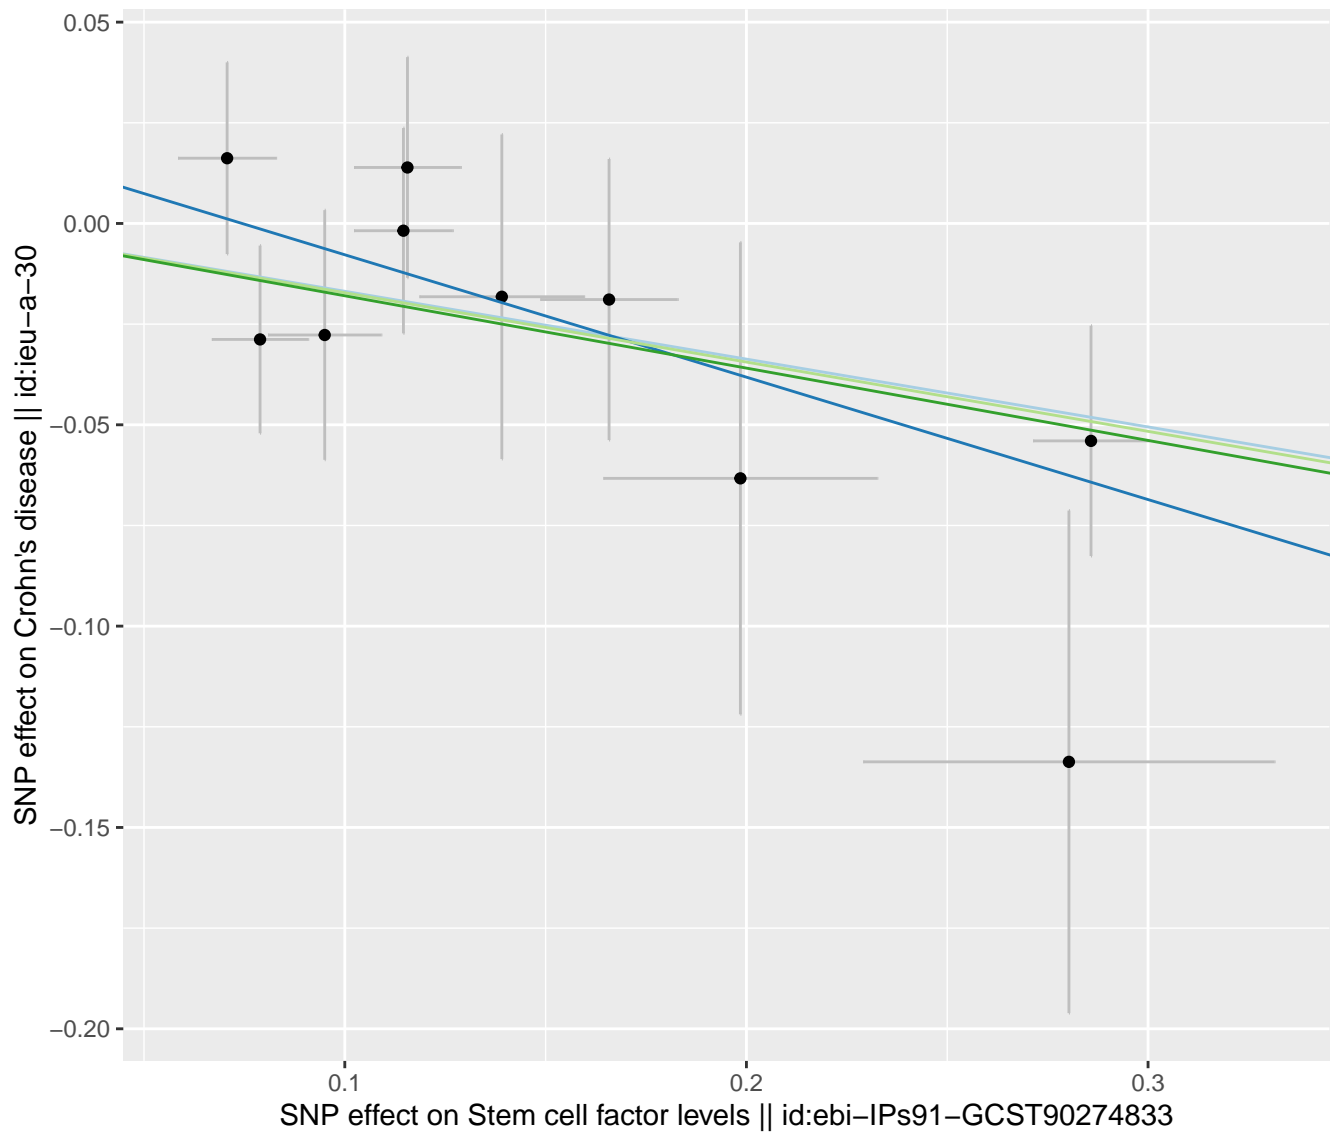

### MR Test

- Inverse variance weighted
- MR Egger
- Weighted median
- Weighted mode

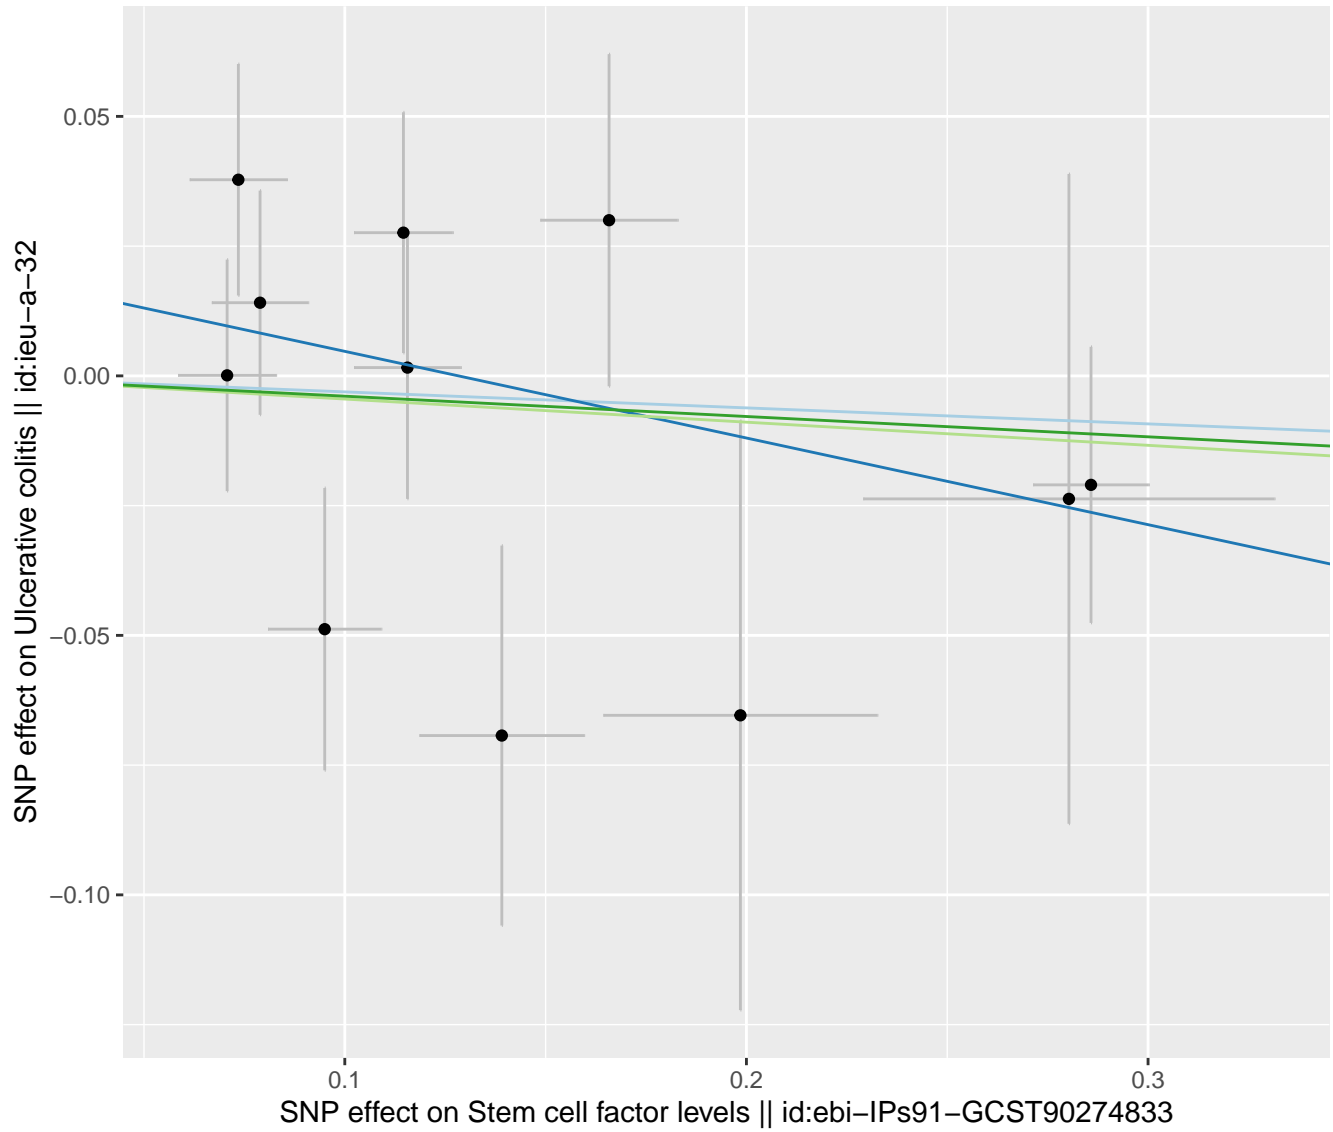

MR Test

- Inverse variance weighted
- MR Egger
- Weighted median
- Weighted mode

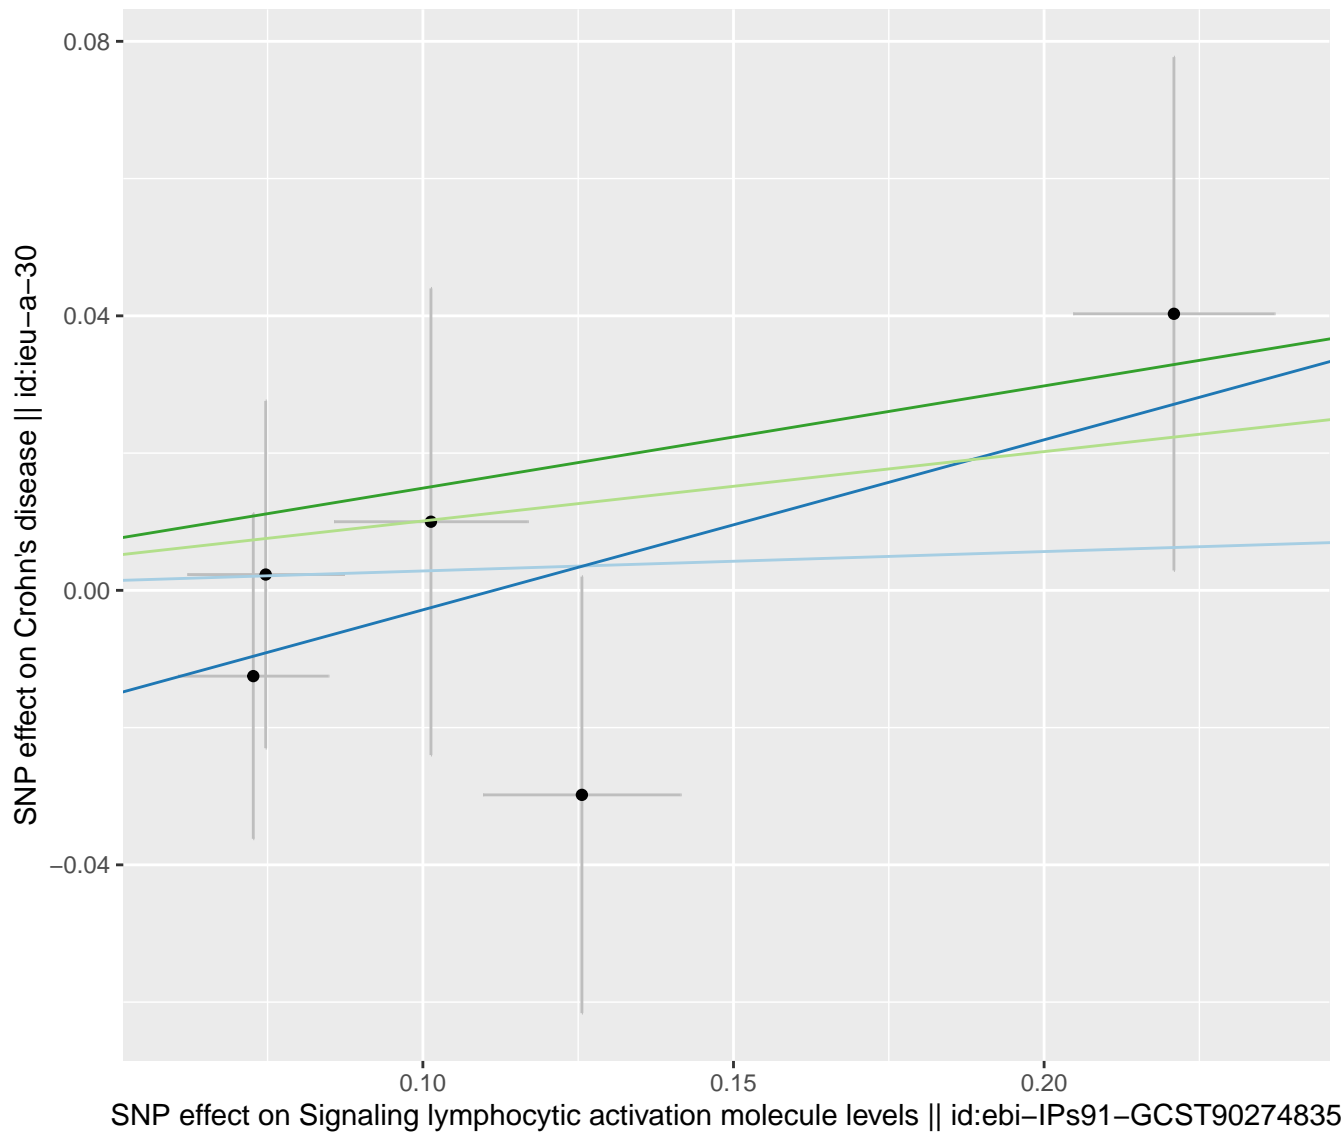

### MR Test

- Inverse variance weighted
- MR Egger
- Weighted median
- Weighted mode

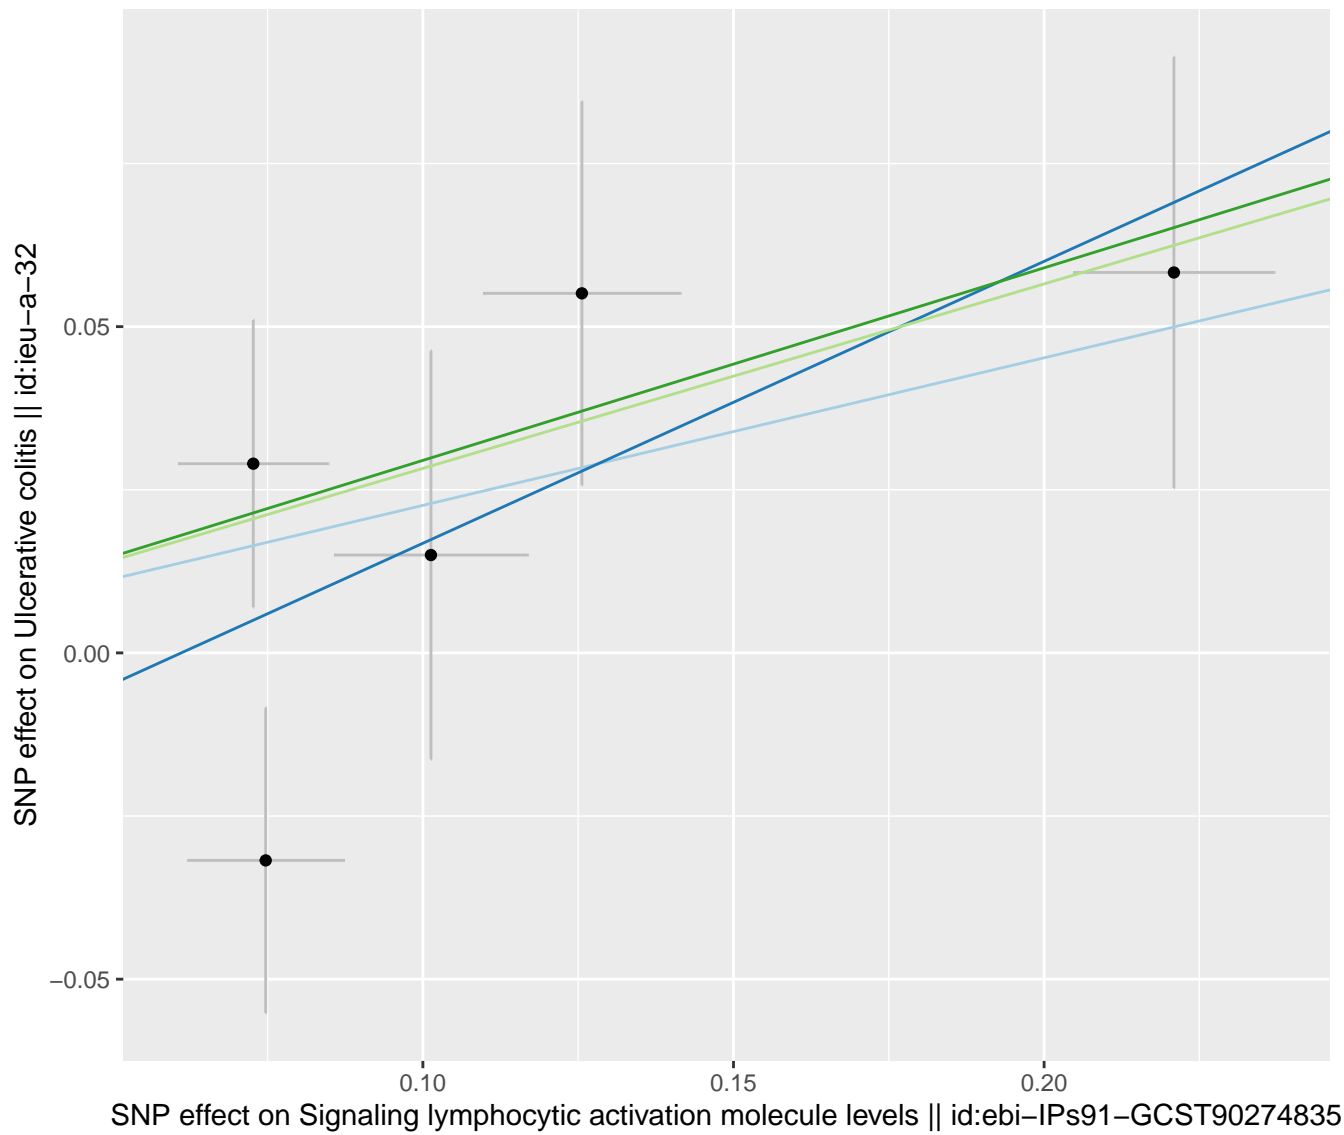

# MR Test

Inverse variance weighted

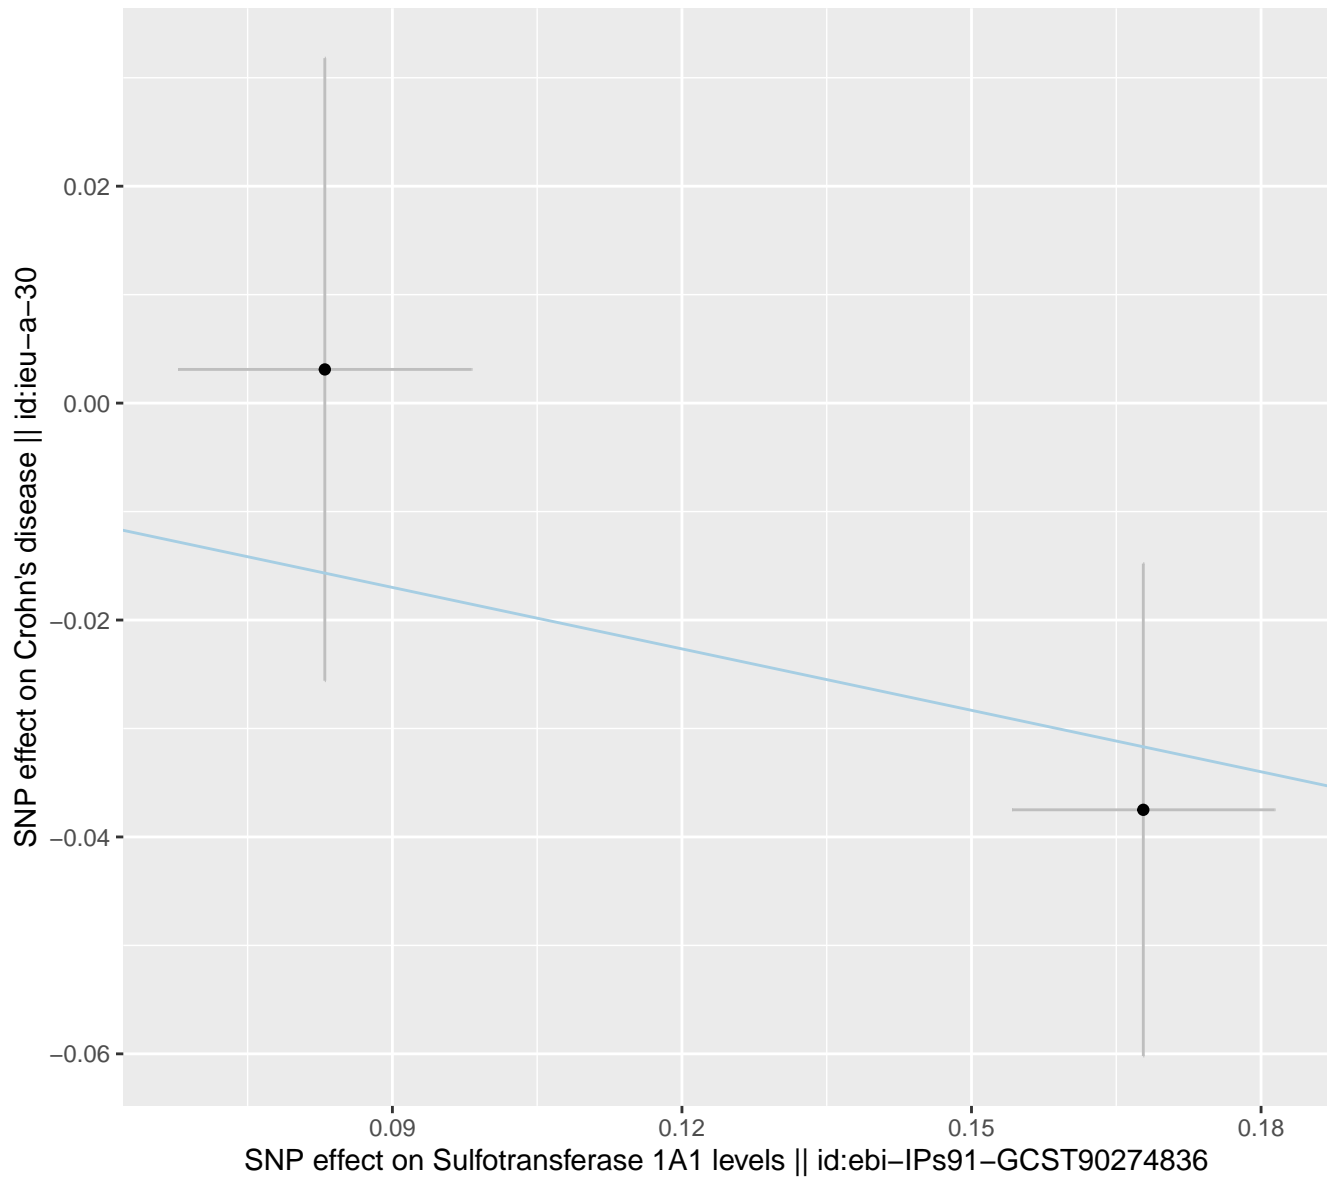

### MR Test

- Inverse variance weighted
- MR Egger
- Weighted median
- Weighted mode

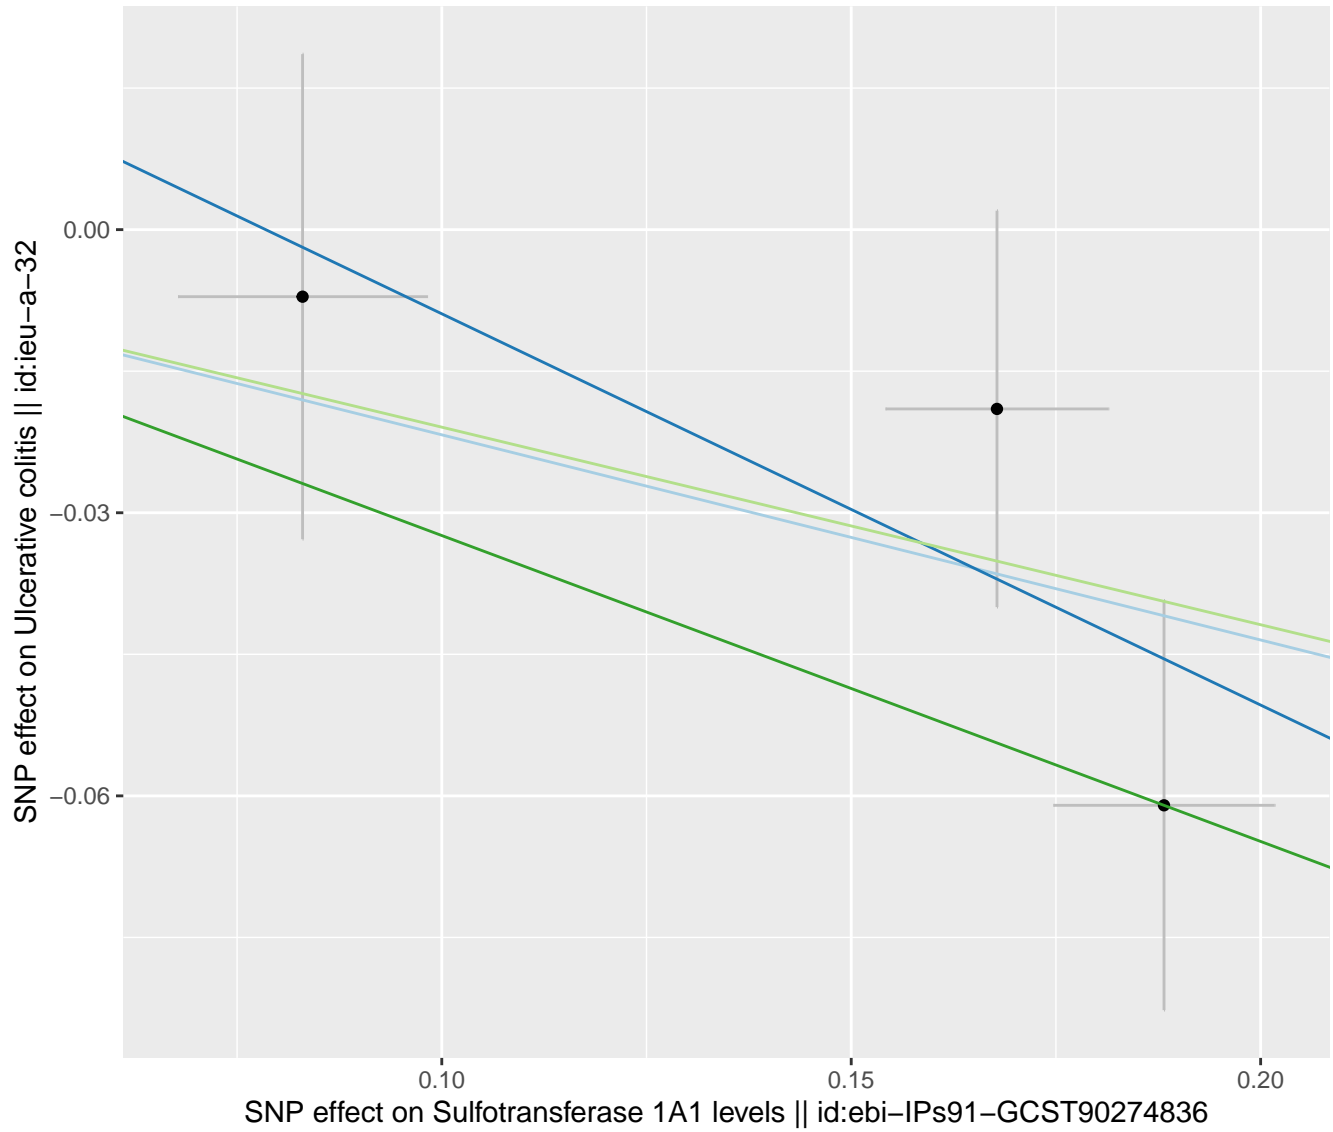



# MR Test

Inverse variance weighted

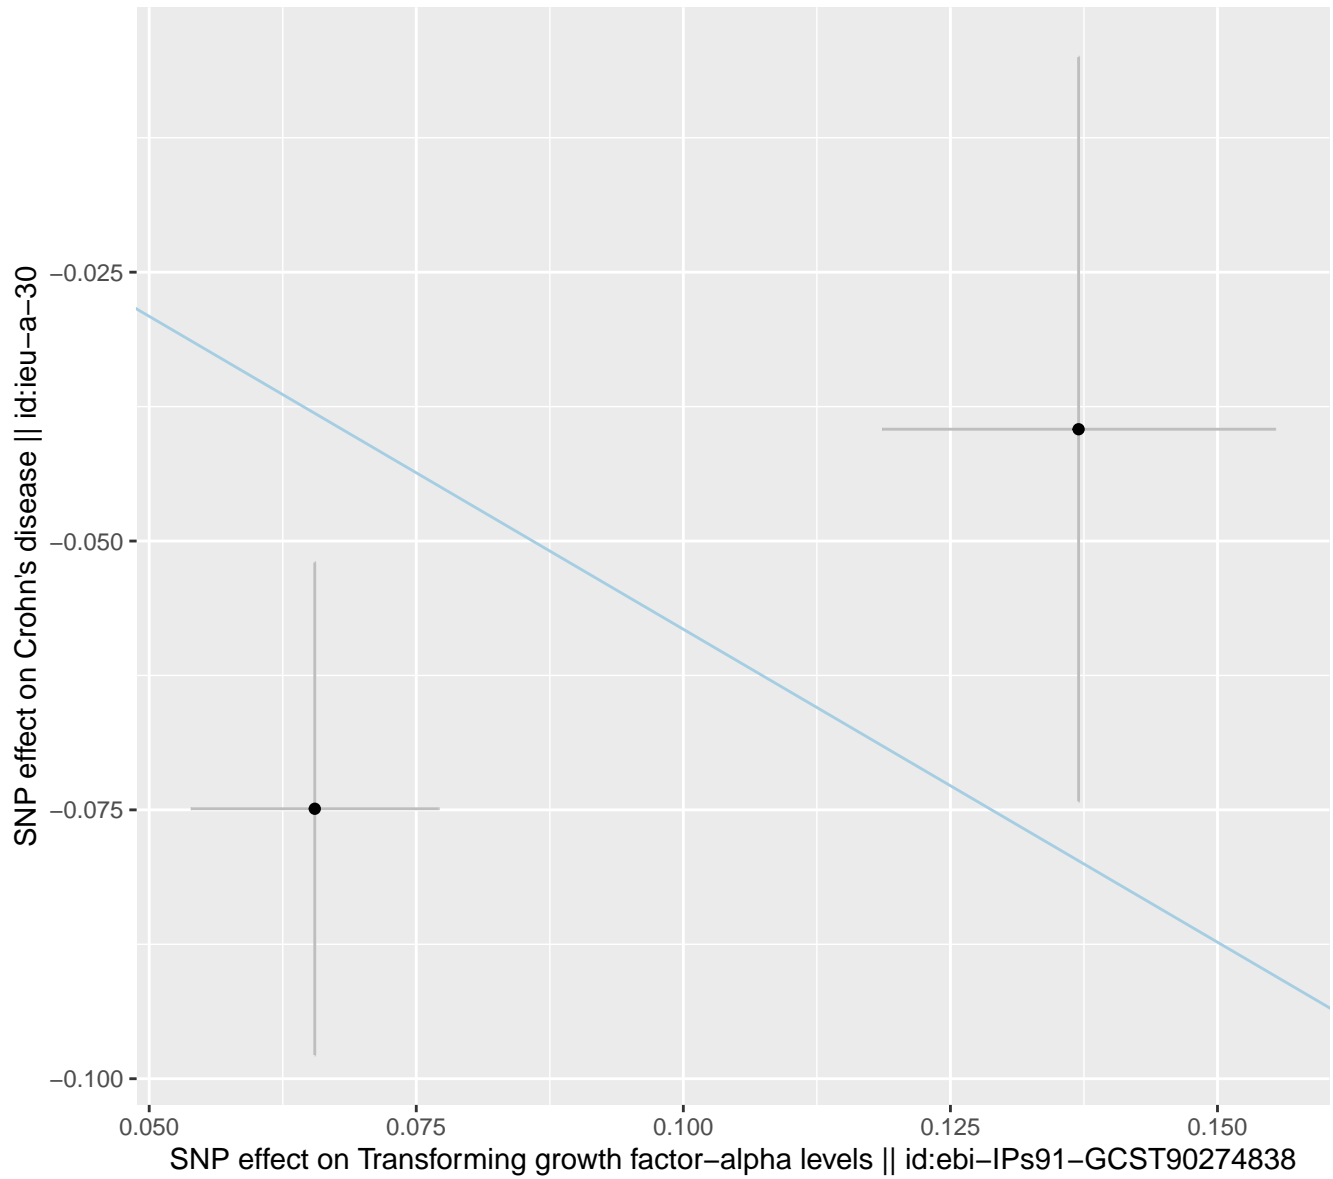

MR Test

Inverse variance weighted

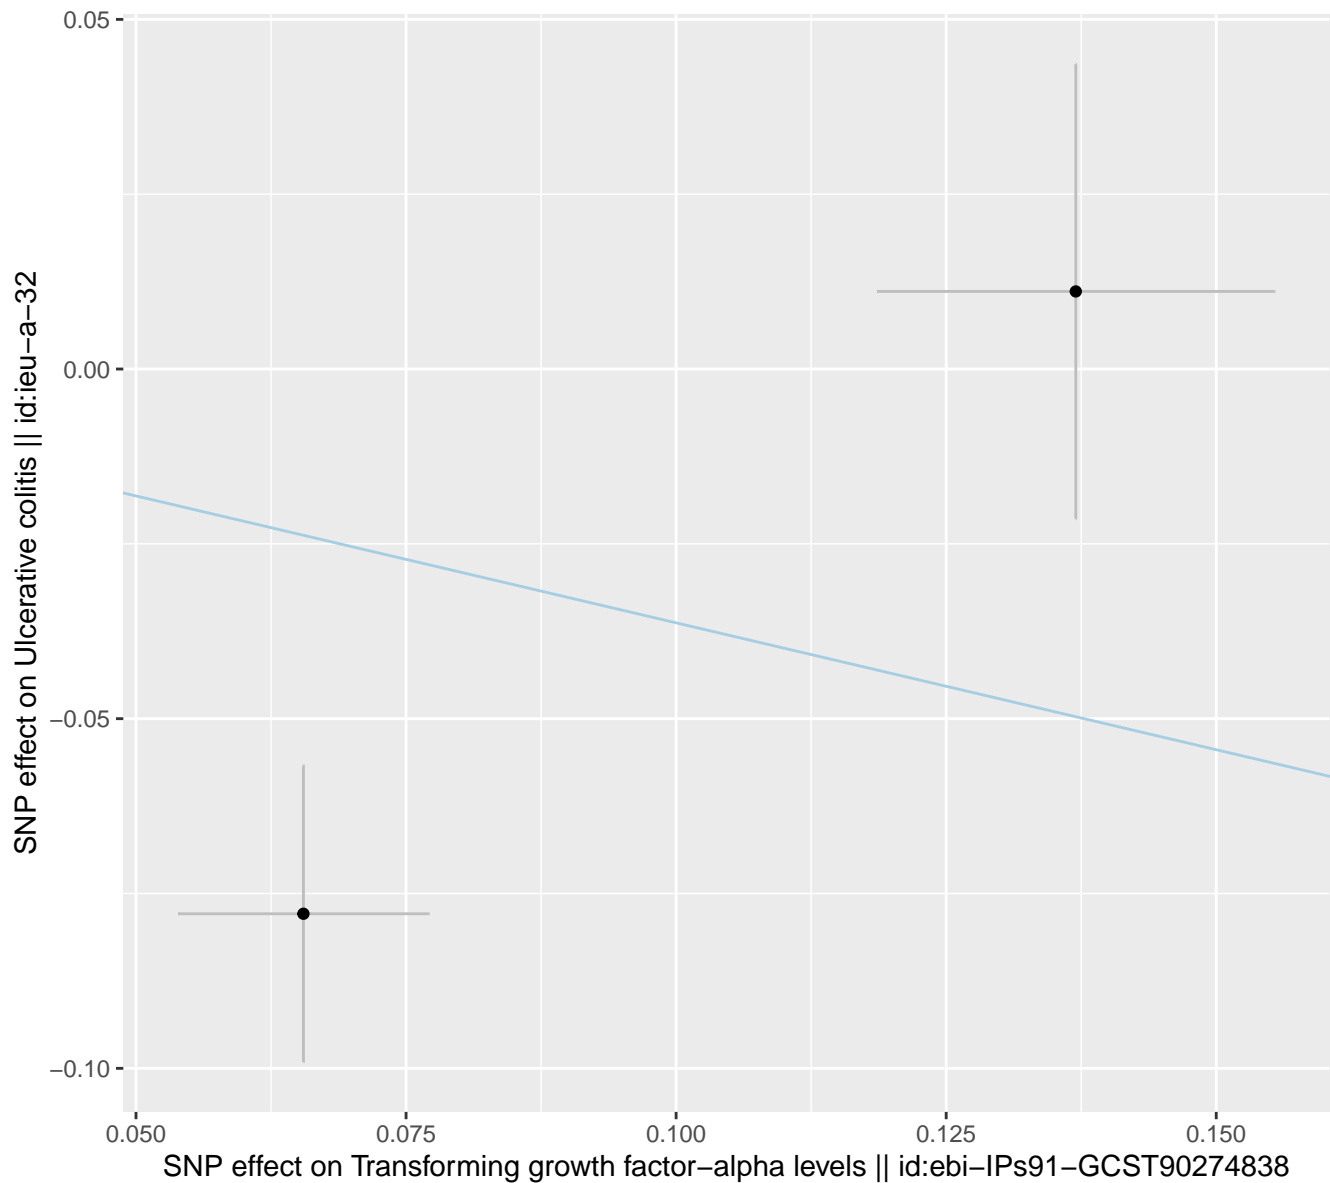

### MR Test

Inverse variance weighted

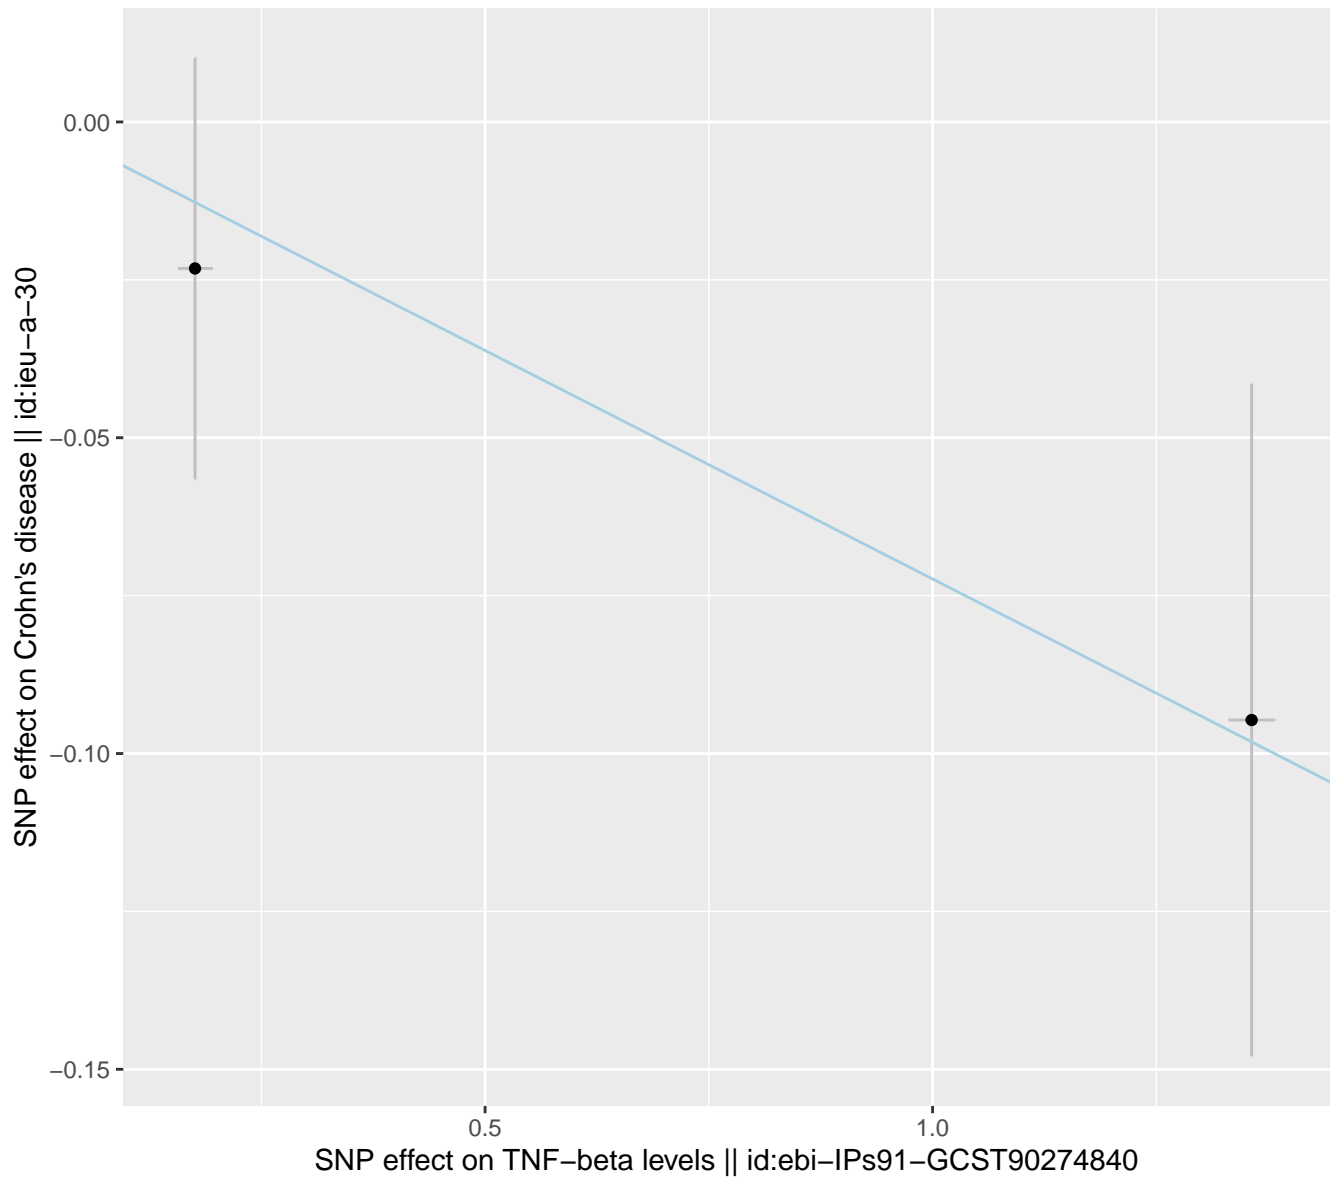

MR Test

Inverse variance weighted

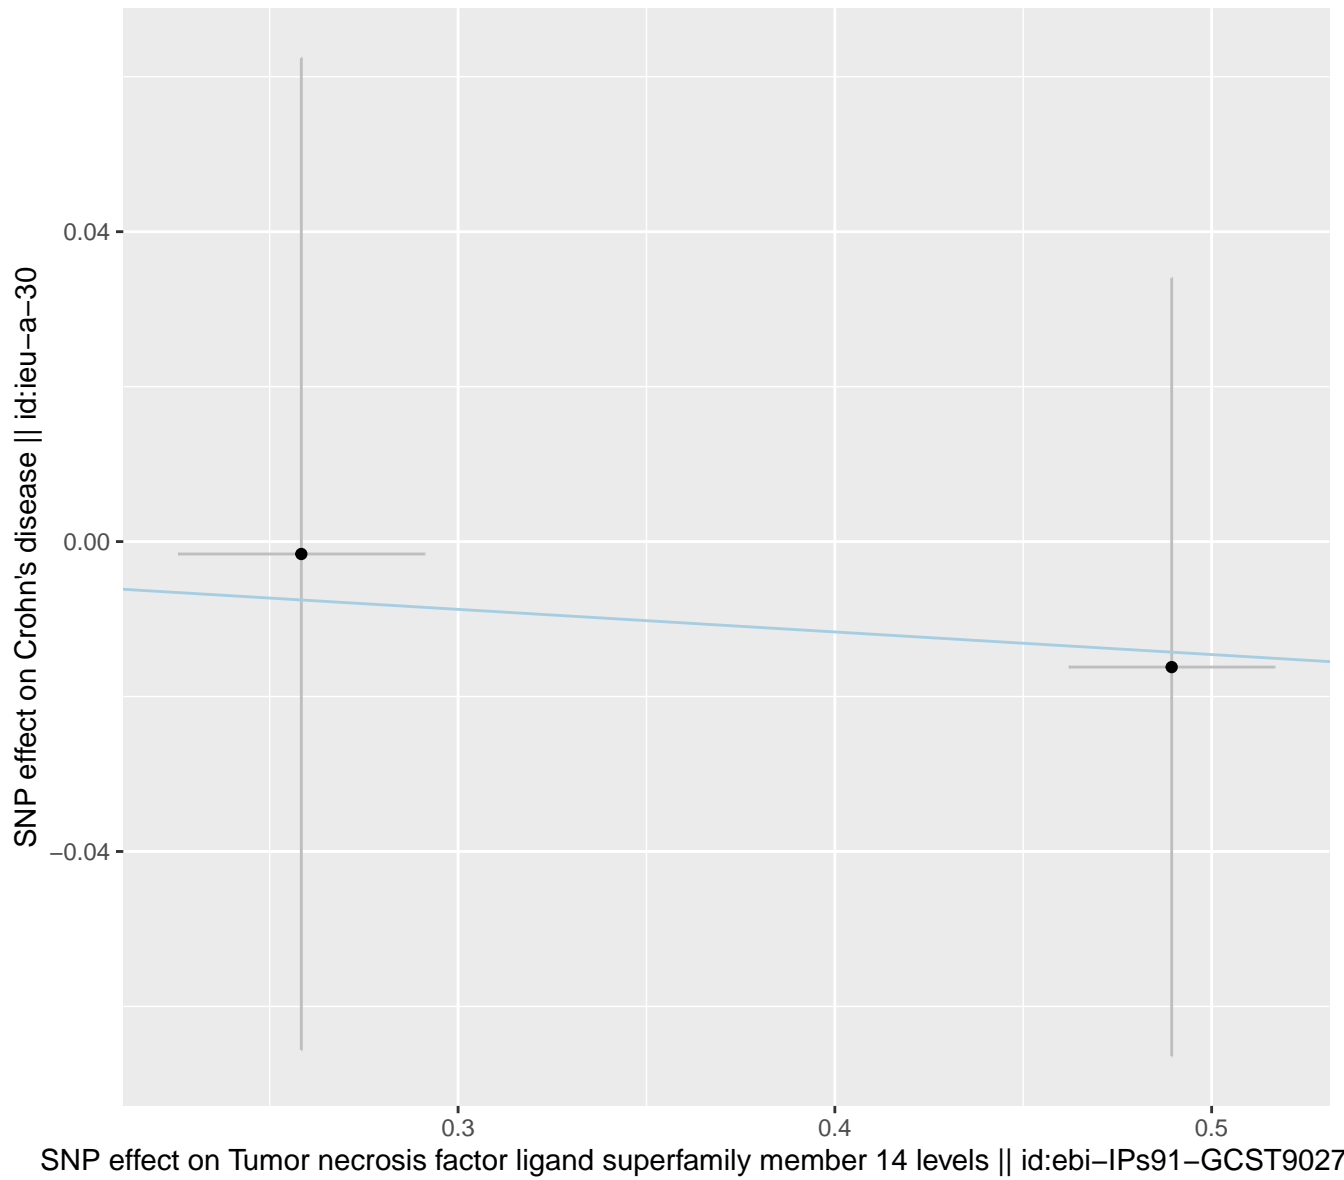

### MR Test

- Inverse variance weighted
- MR Egger
- Weighted median
- Weighted mode

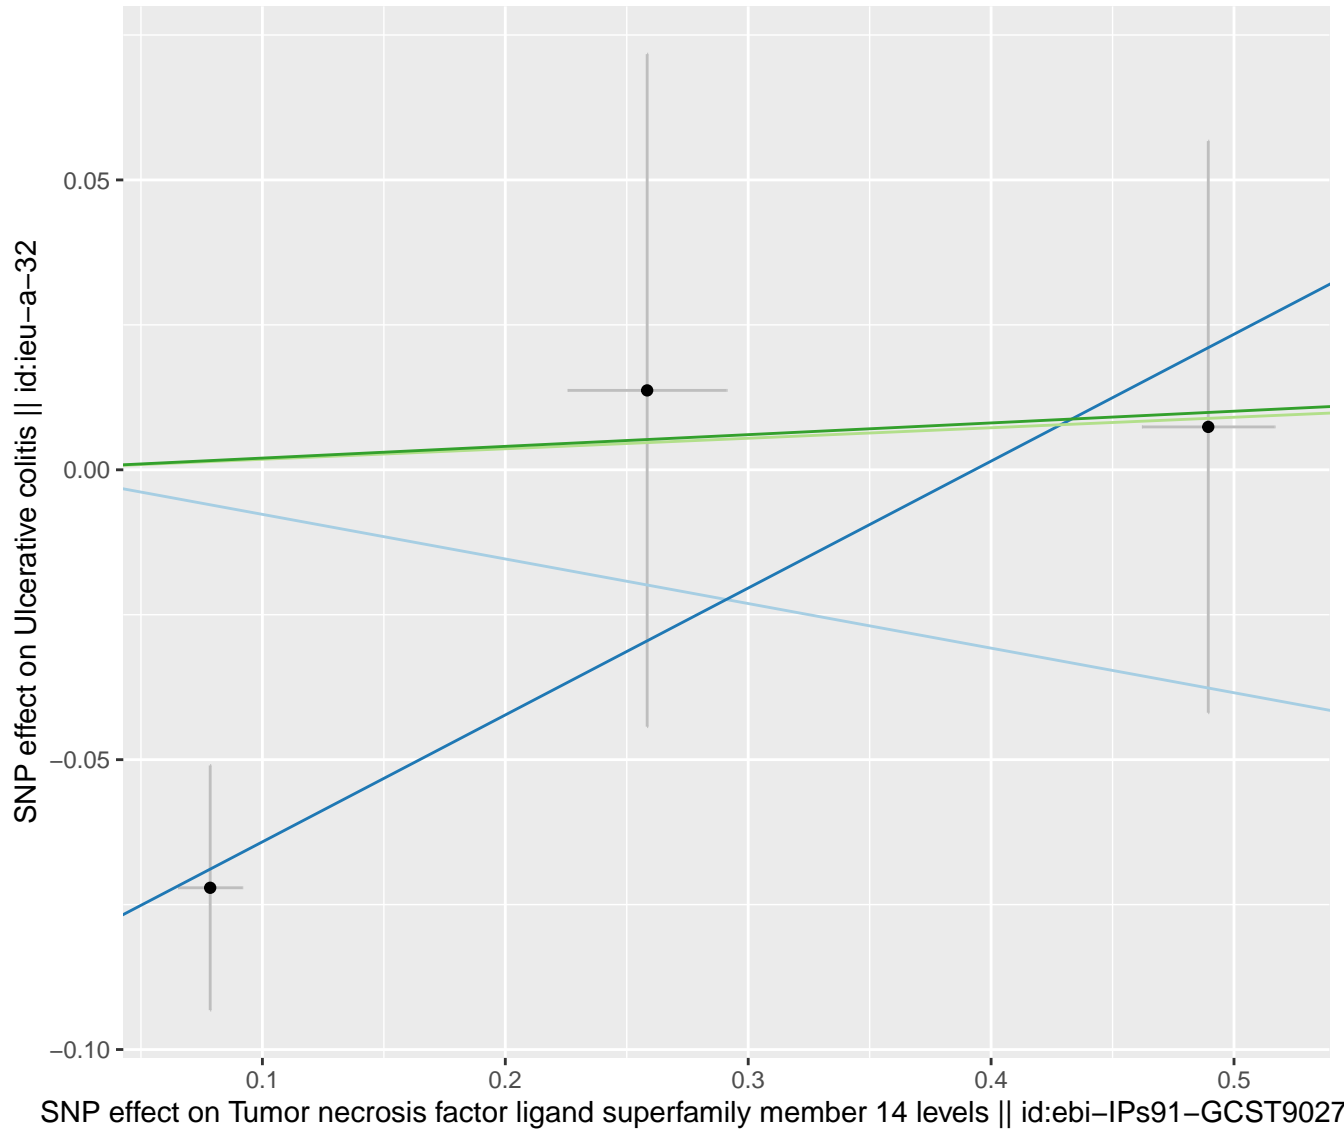

MR Test

- Inverse variance weighted
- MR Egger
- Weighted median
- Weighted mode

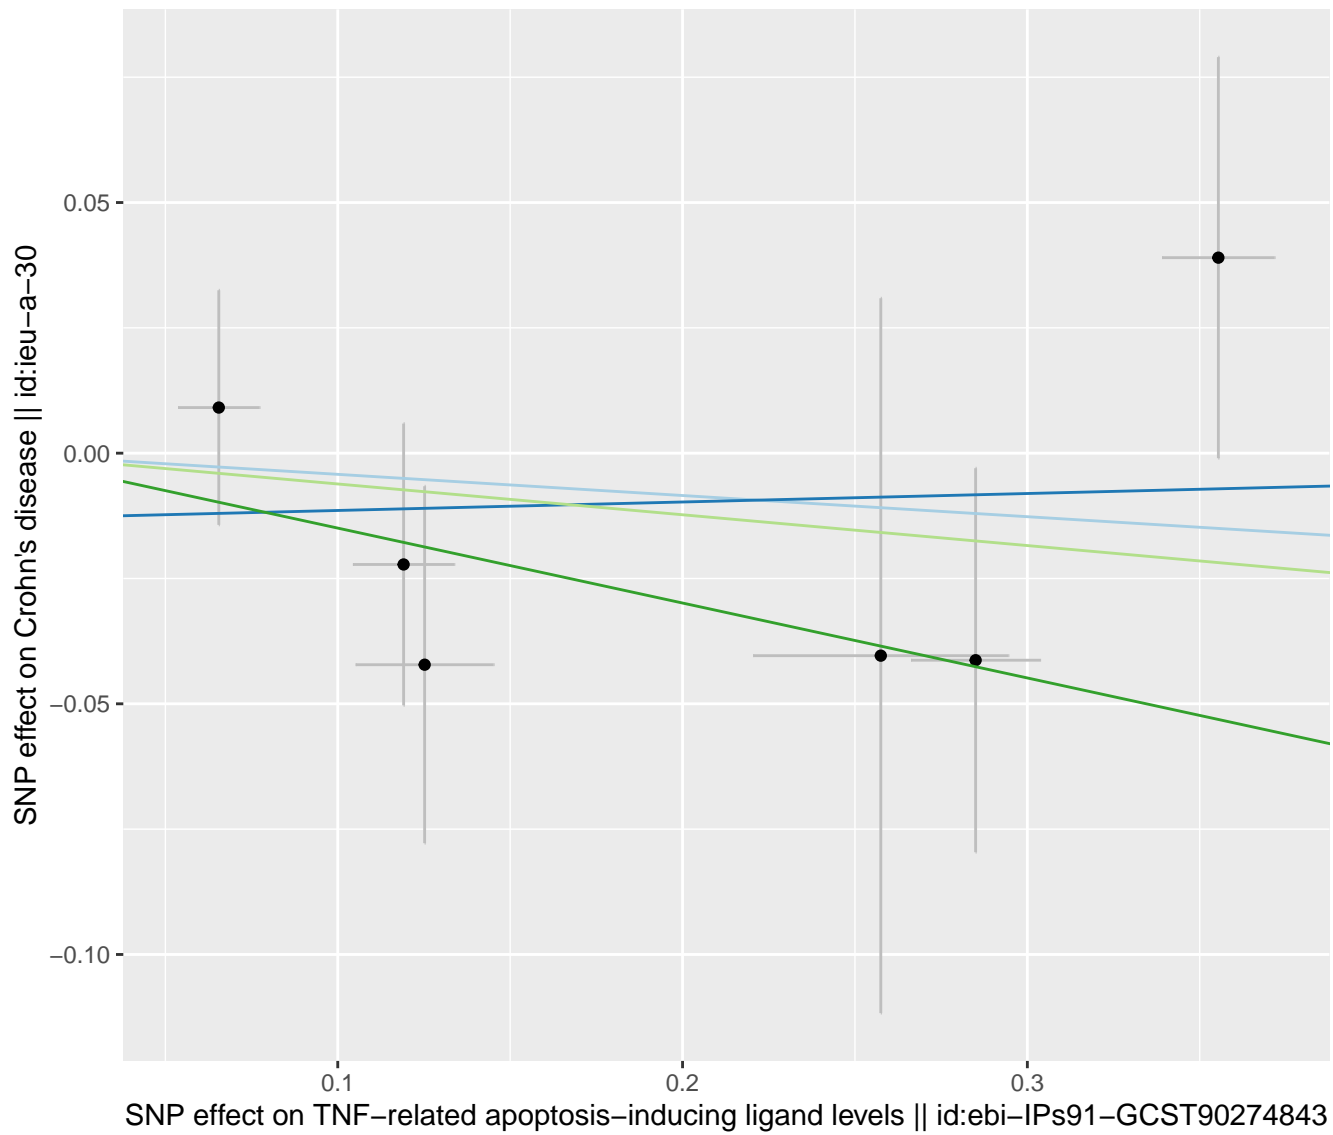

MR Test

- Inverse variance weighted
- MR Egger
- Weighted median
- Weighted mode

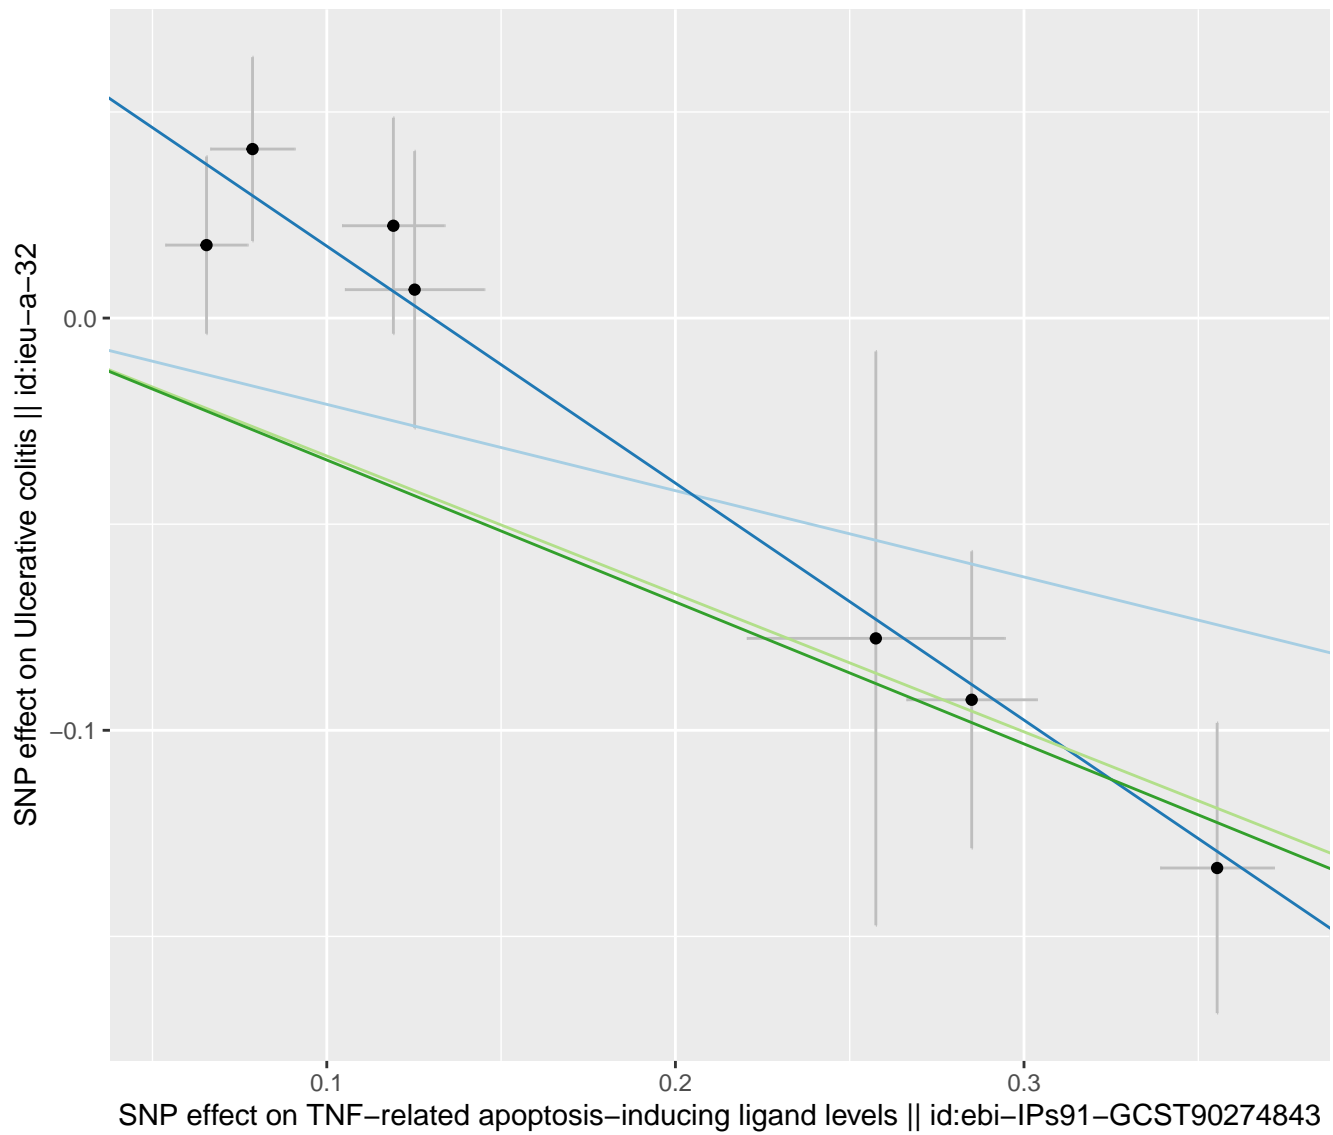

### MR Test

- Inverse variance weighted
- MR Egger
- Weighted median
- Weighted mode

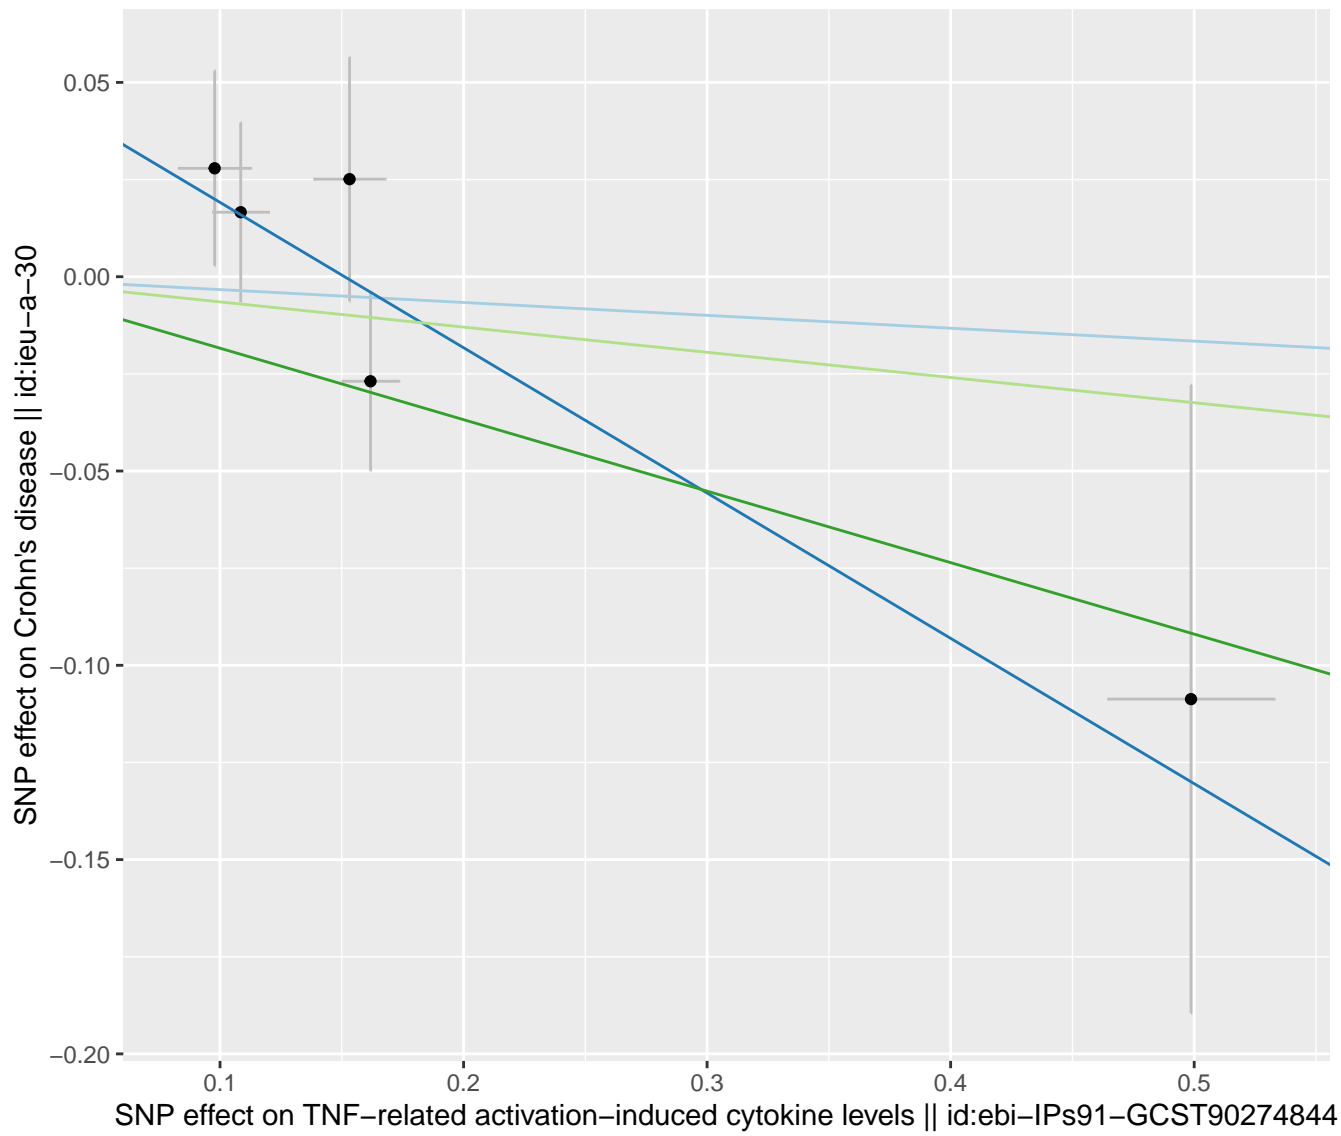



MR Test

- Inverse variance weighted
- MR Egger
- Weighted median
- Weighted mode

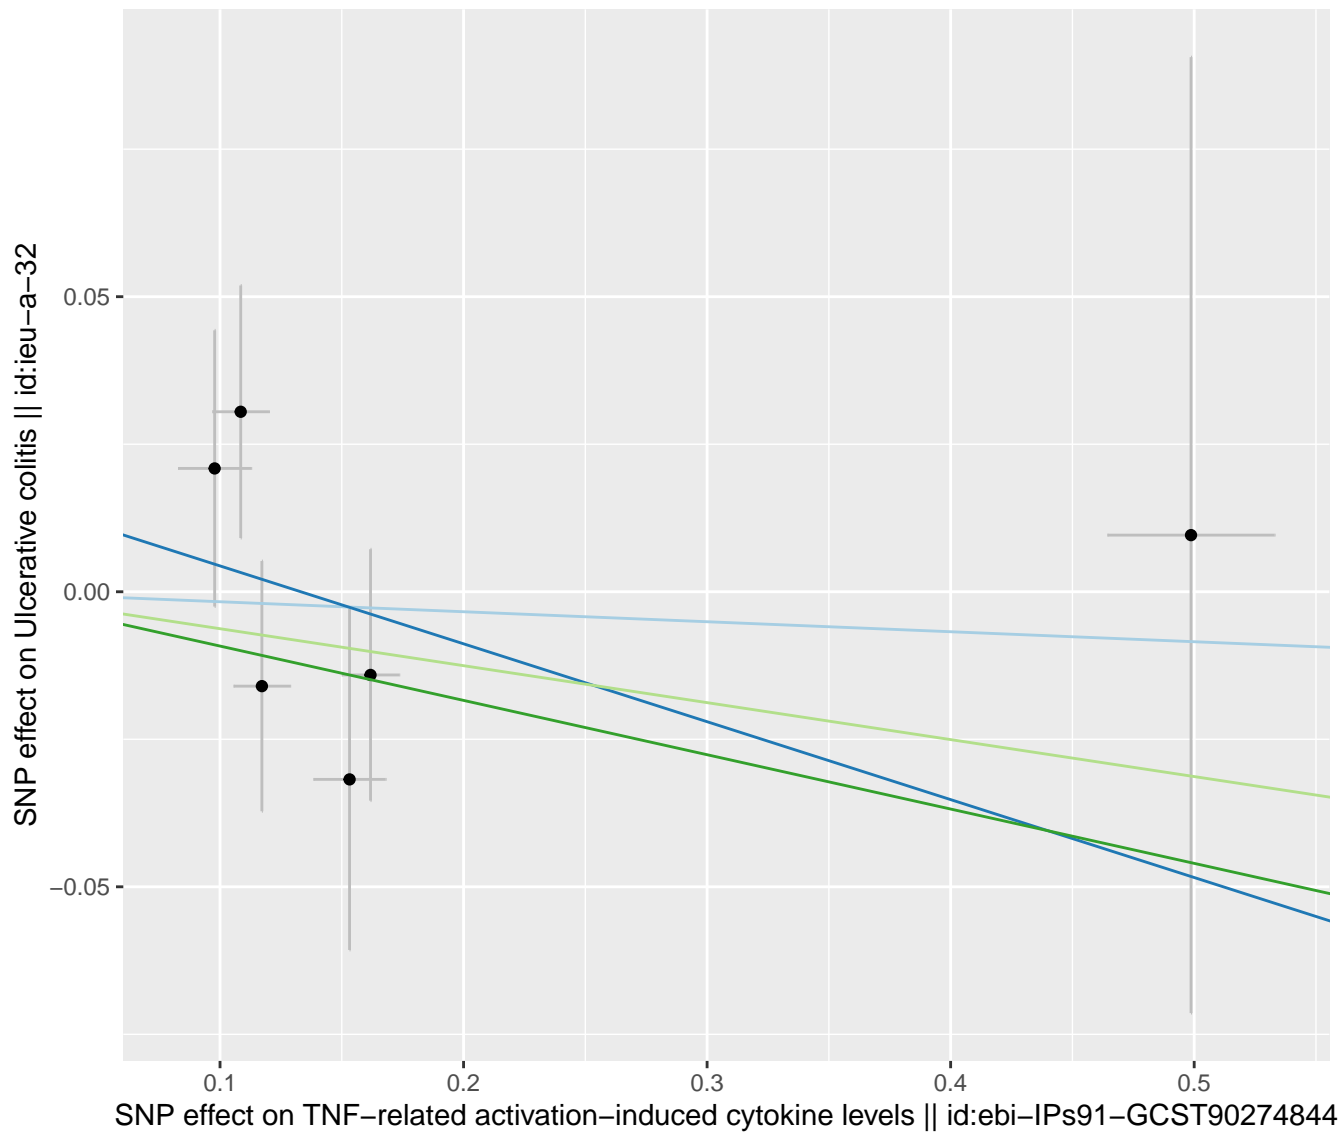

### MR Test

- Inverse variance weighted
- MR Egger
- Weighted median
- Weighted mode

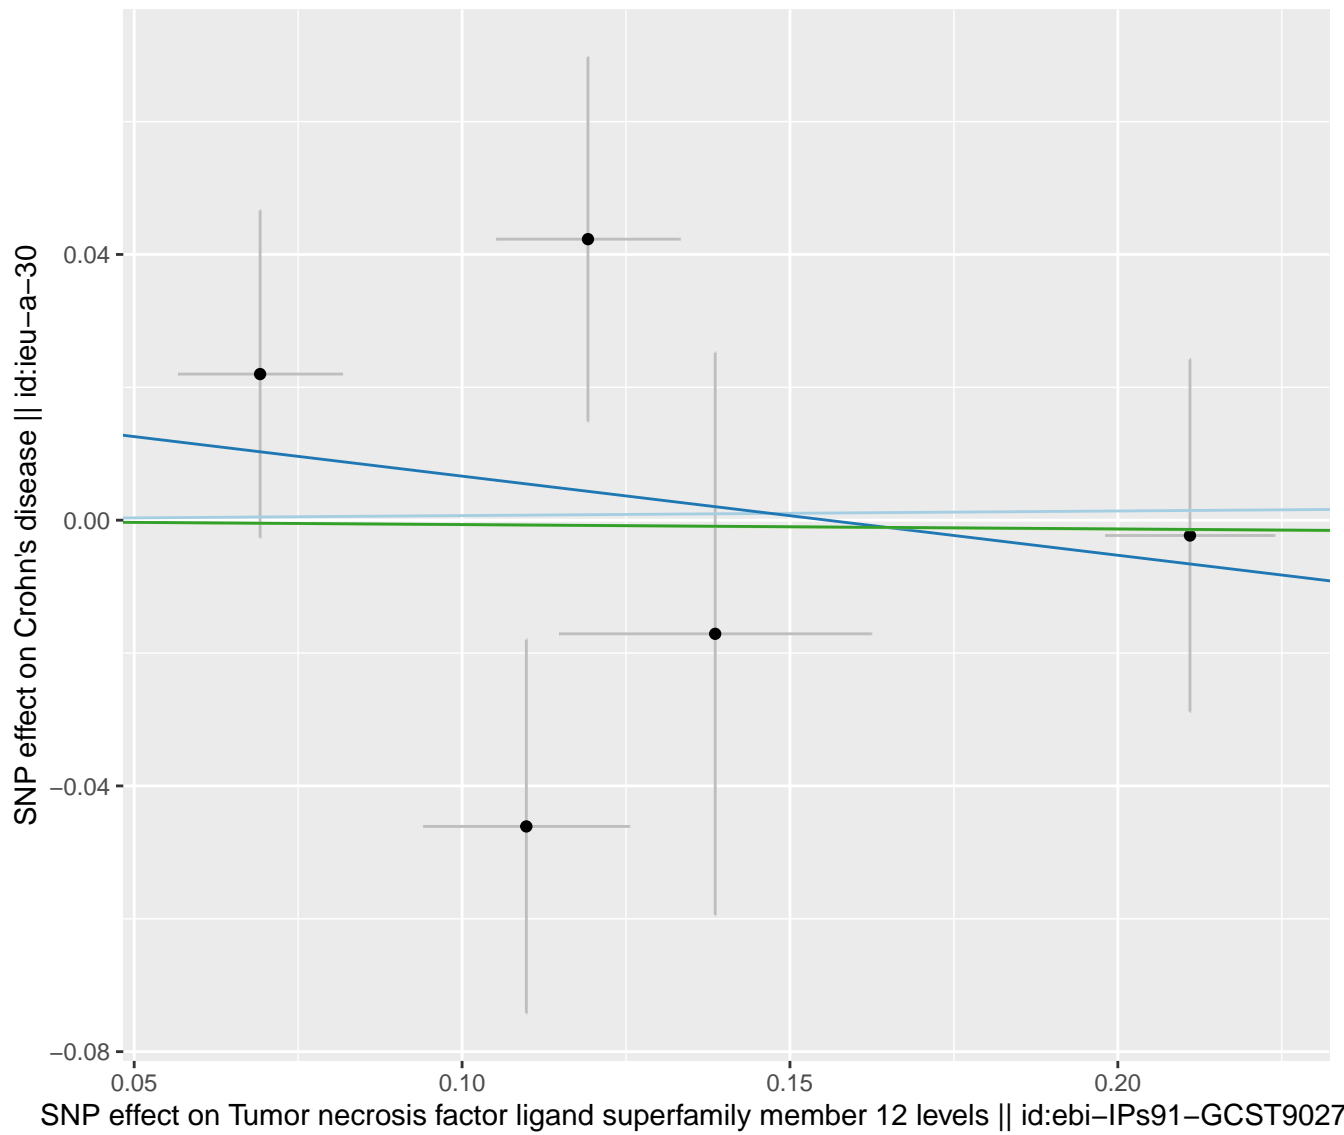

### MR Test

- Inverse variance weighted
- MR Egger
- Weighted median
- Weighted mode

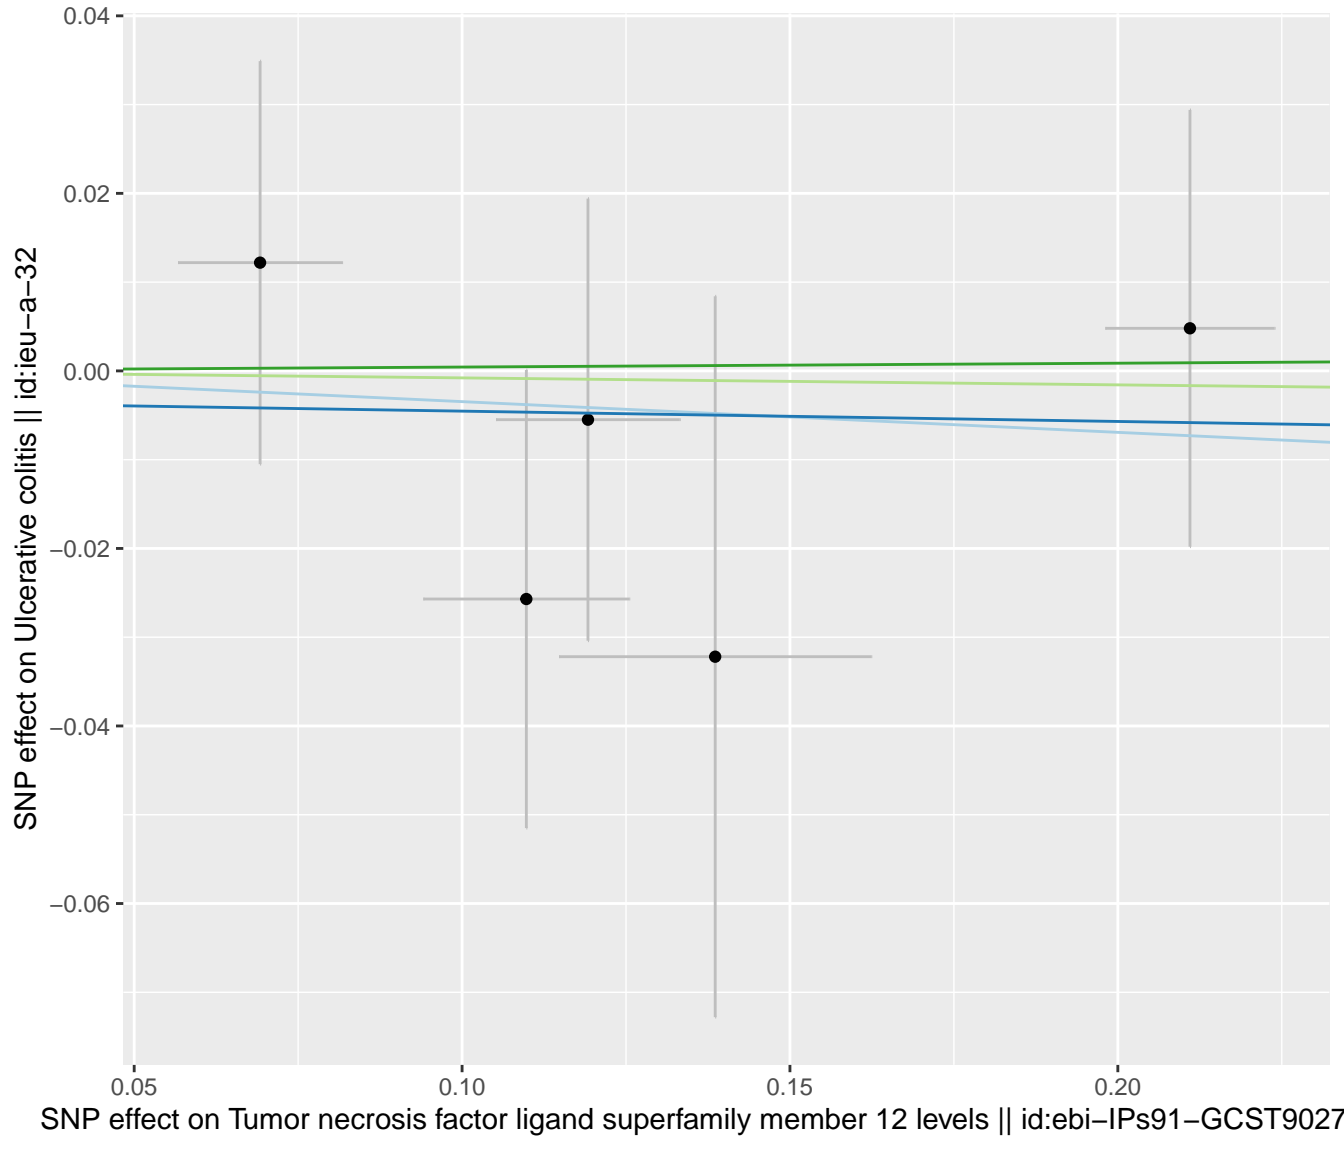

### MR Test

- Inverse variance weighted
- MR Egger
- Weighted median
- Weighted mode

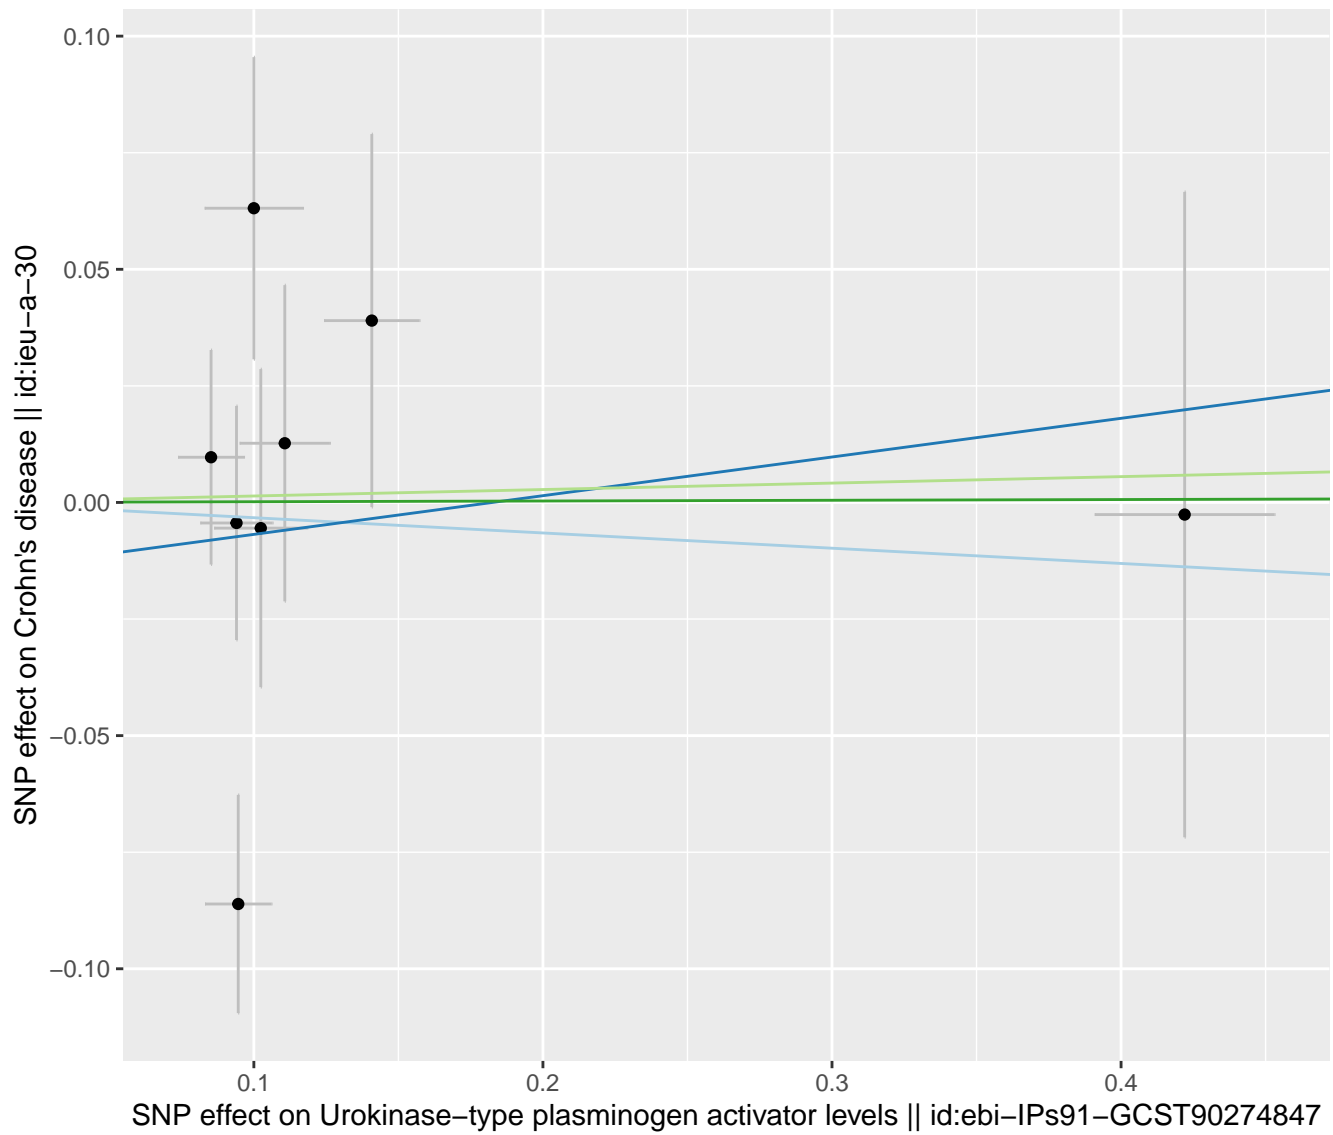

MR Test

- Inverse variance weighted
- MR Egger
- Weighted median
- Weighted mode

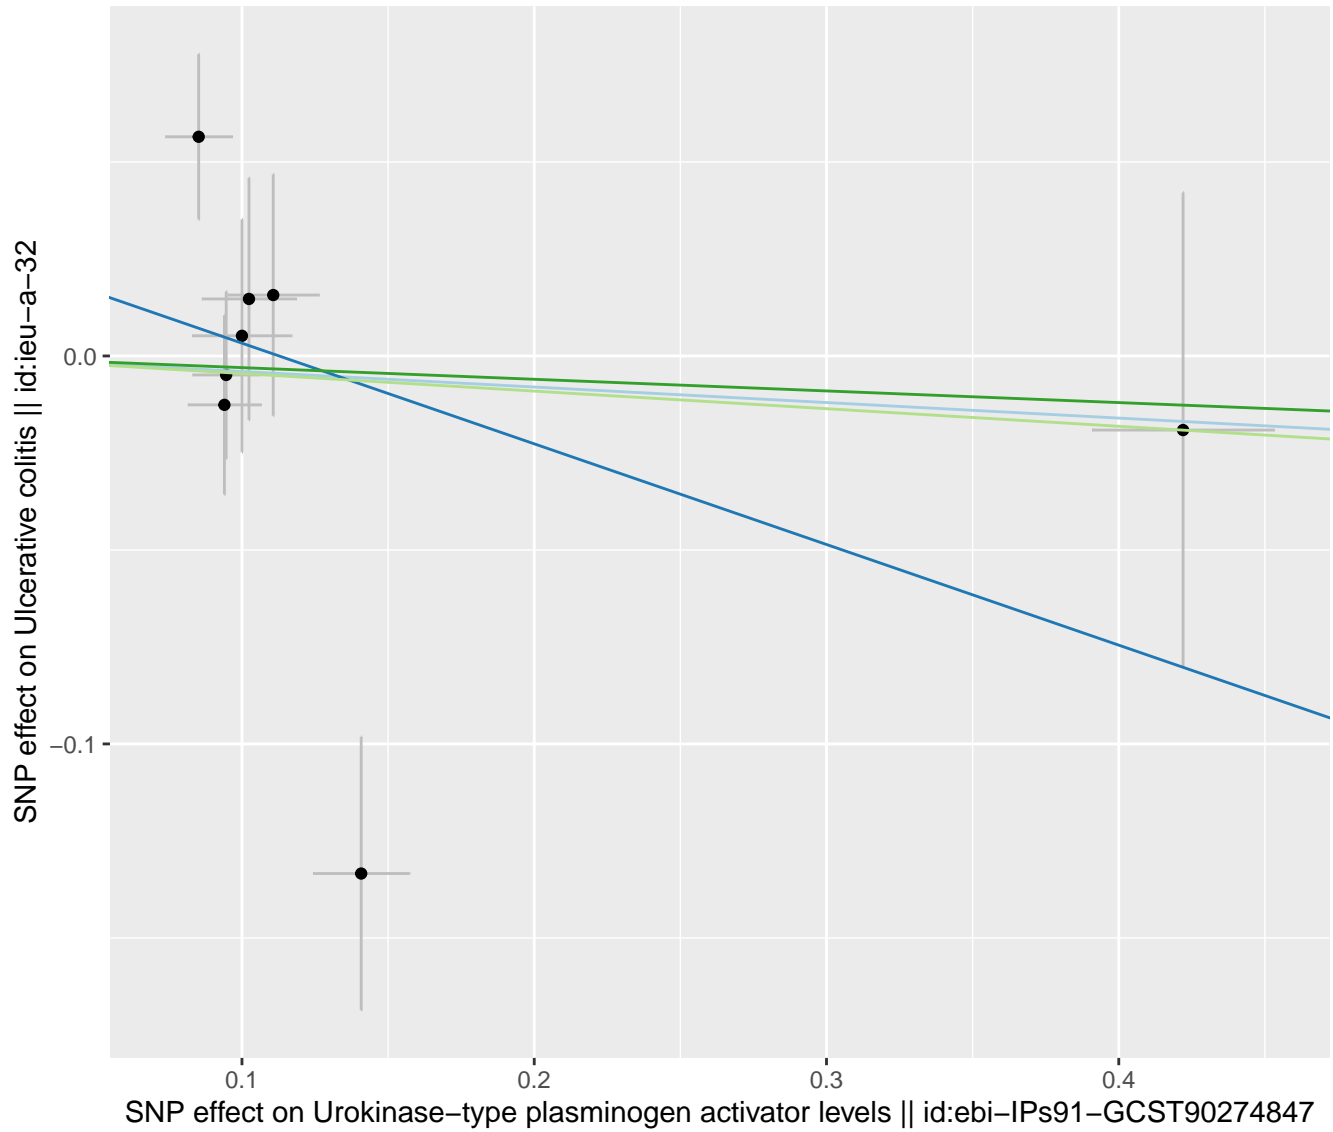

MR Test

- Inverse variance weighted
- MR Egger
- Weighted median
- Weighted mode

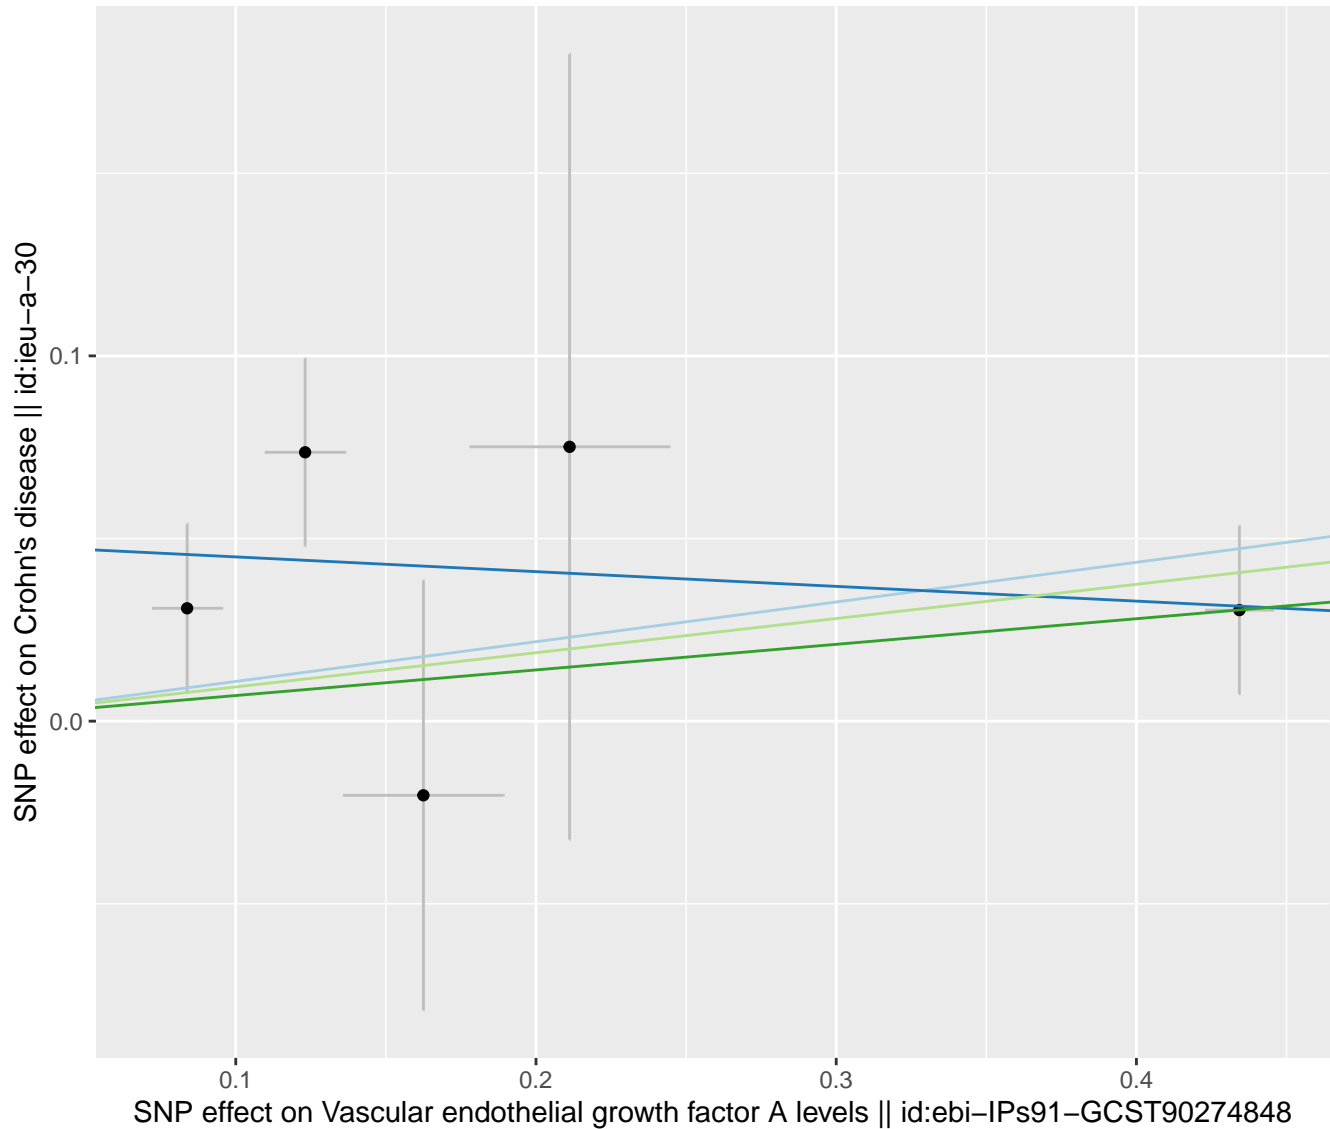

### MR Test

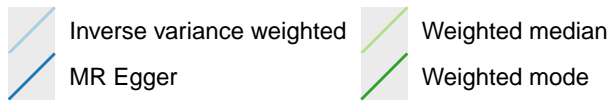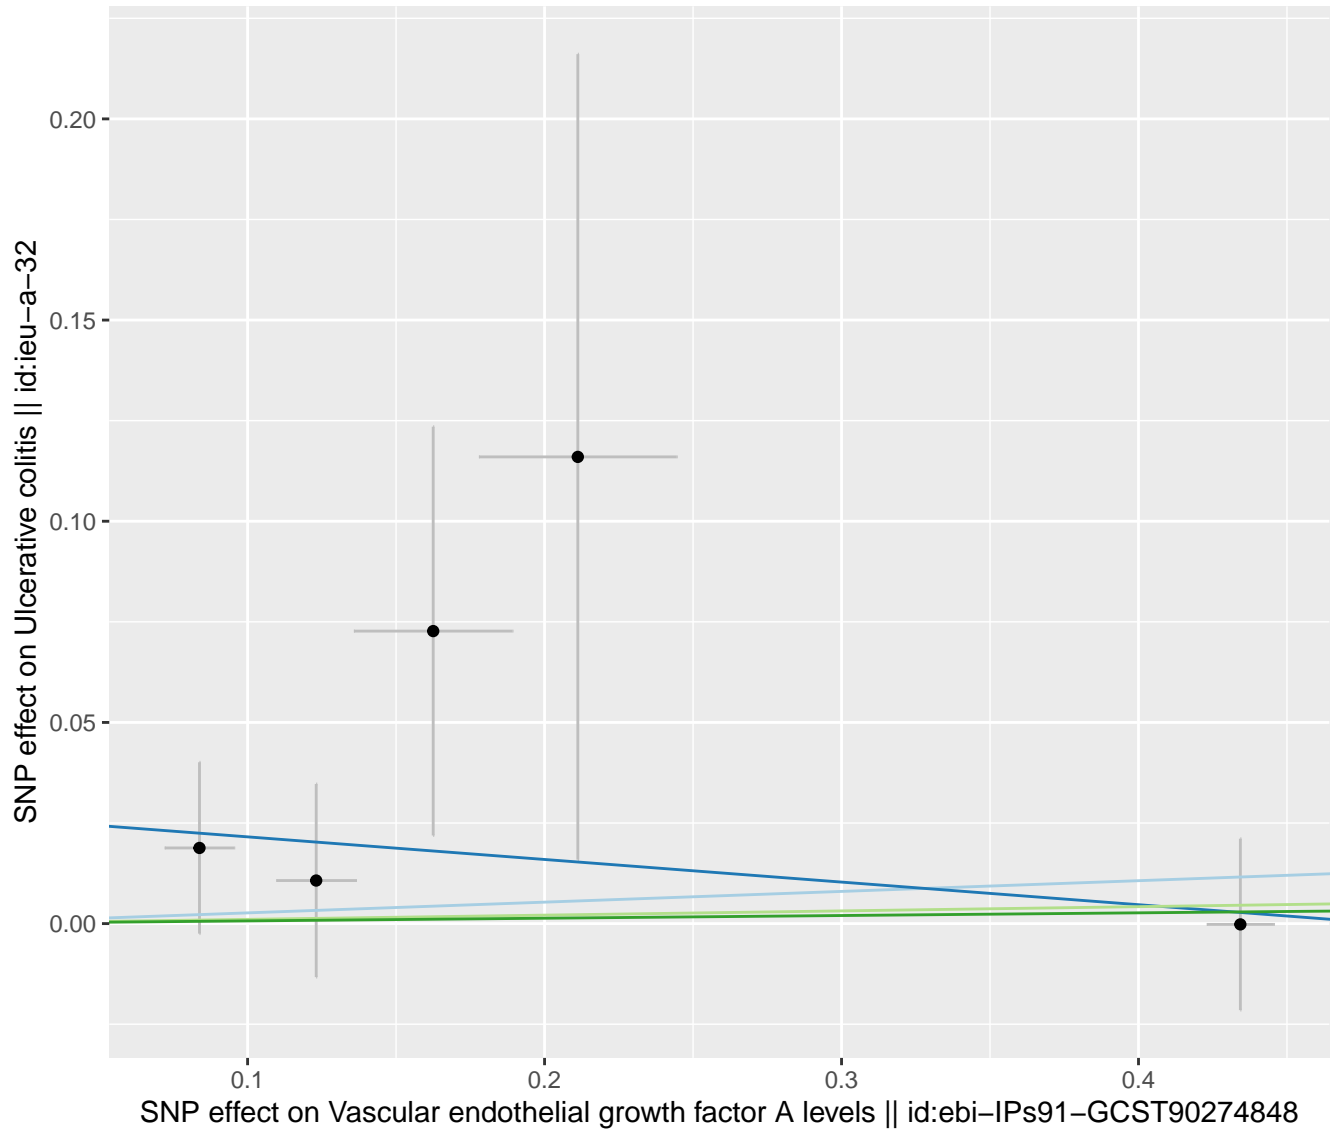

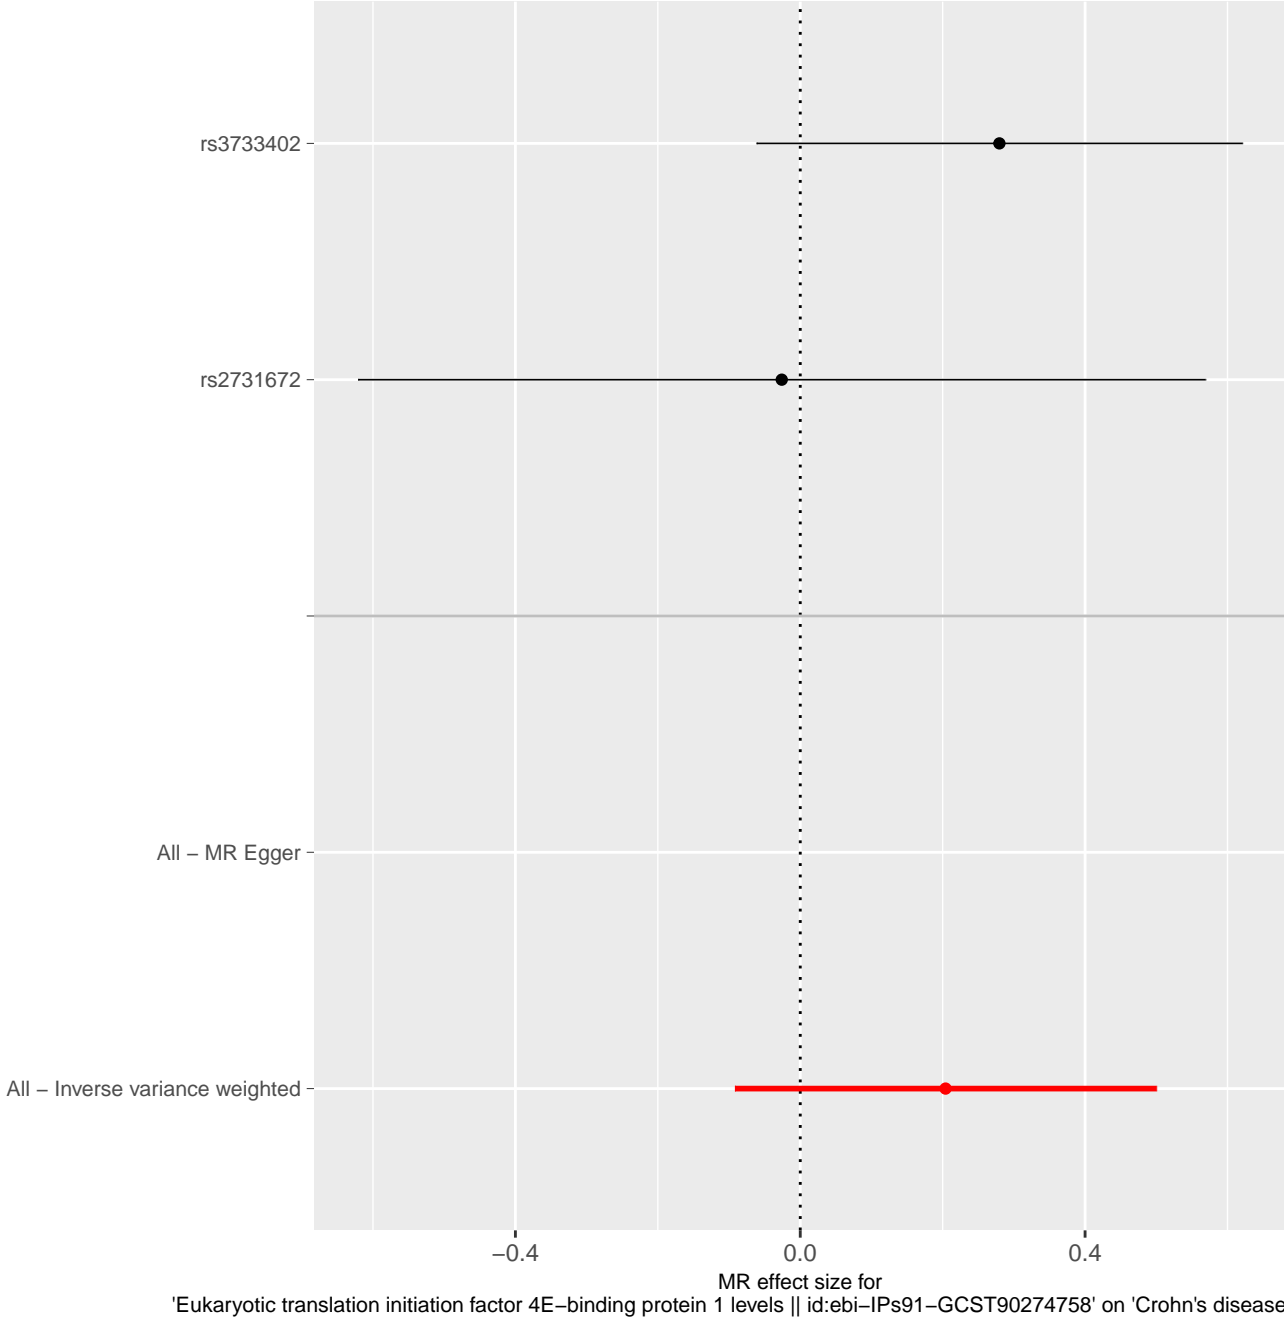



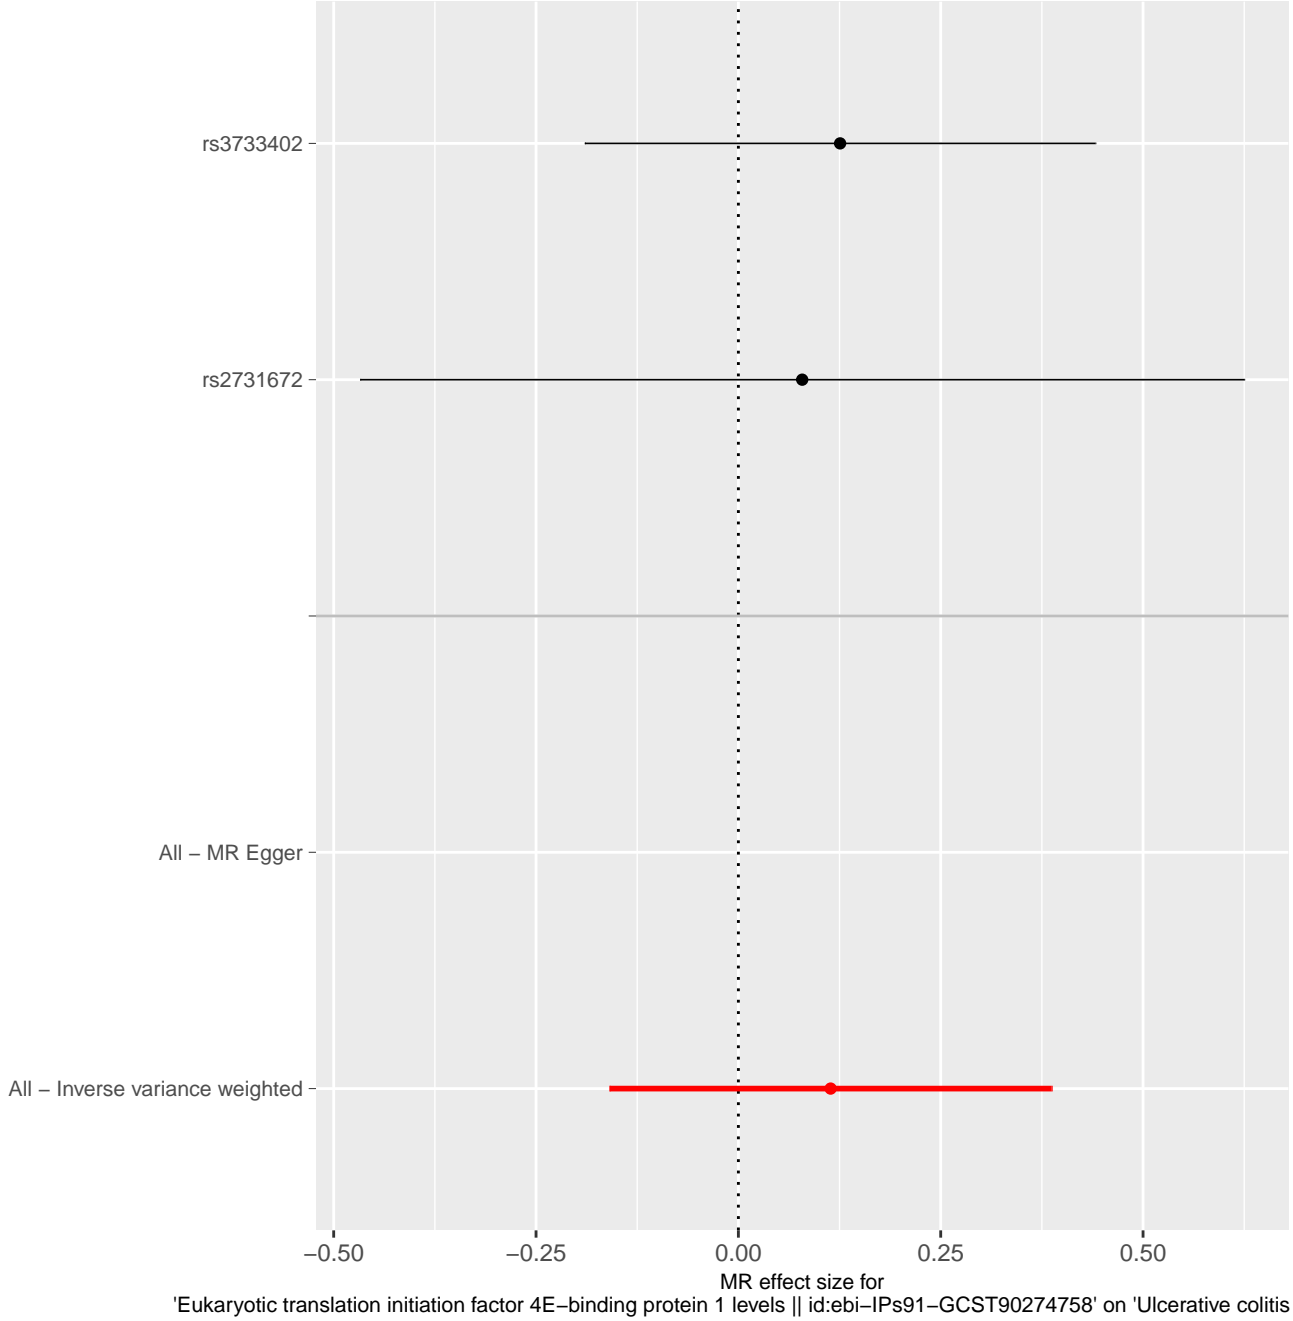

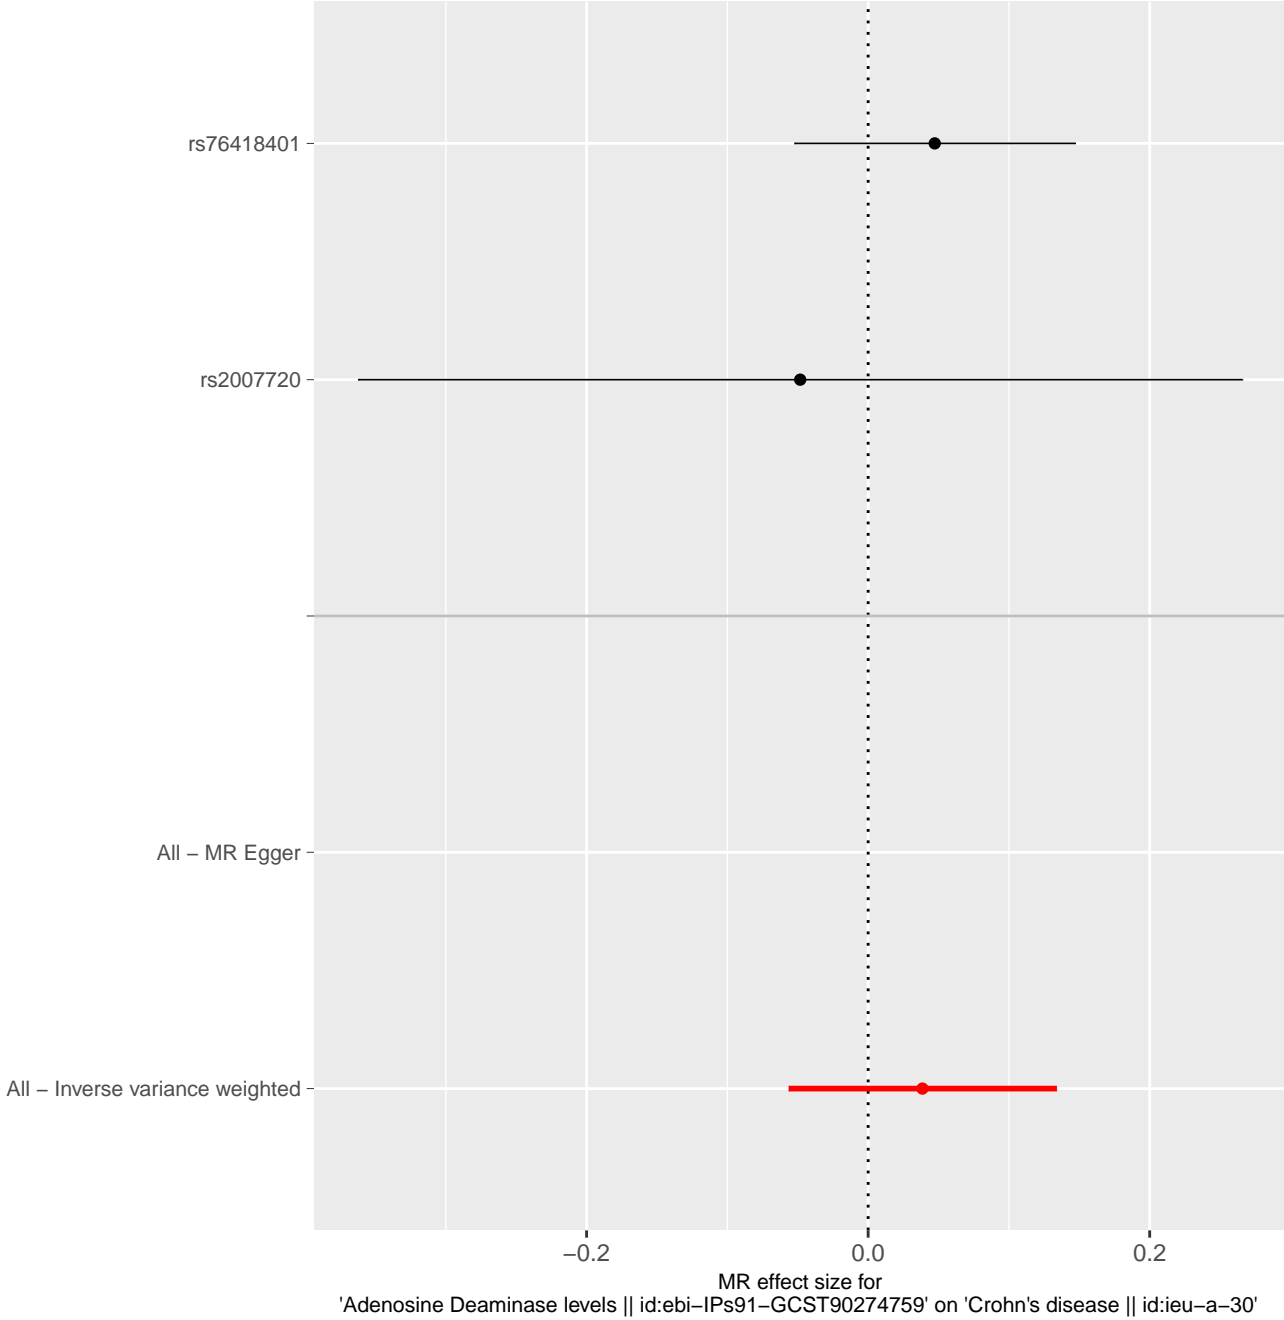

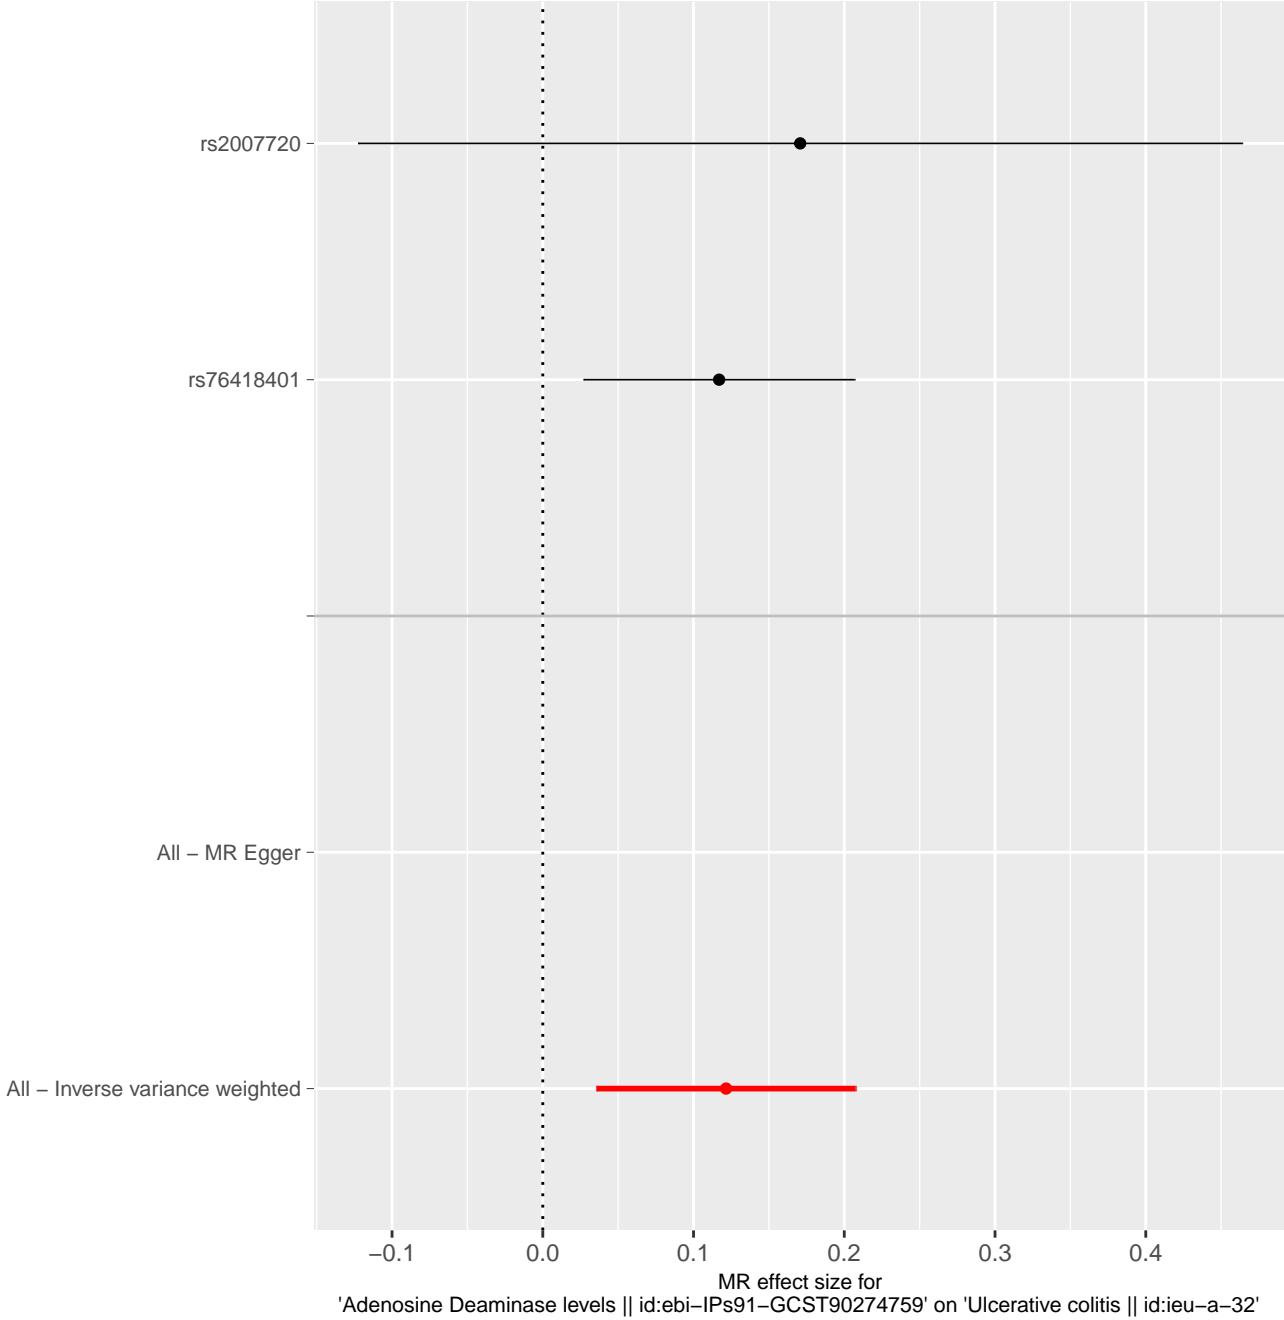

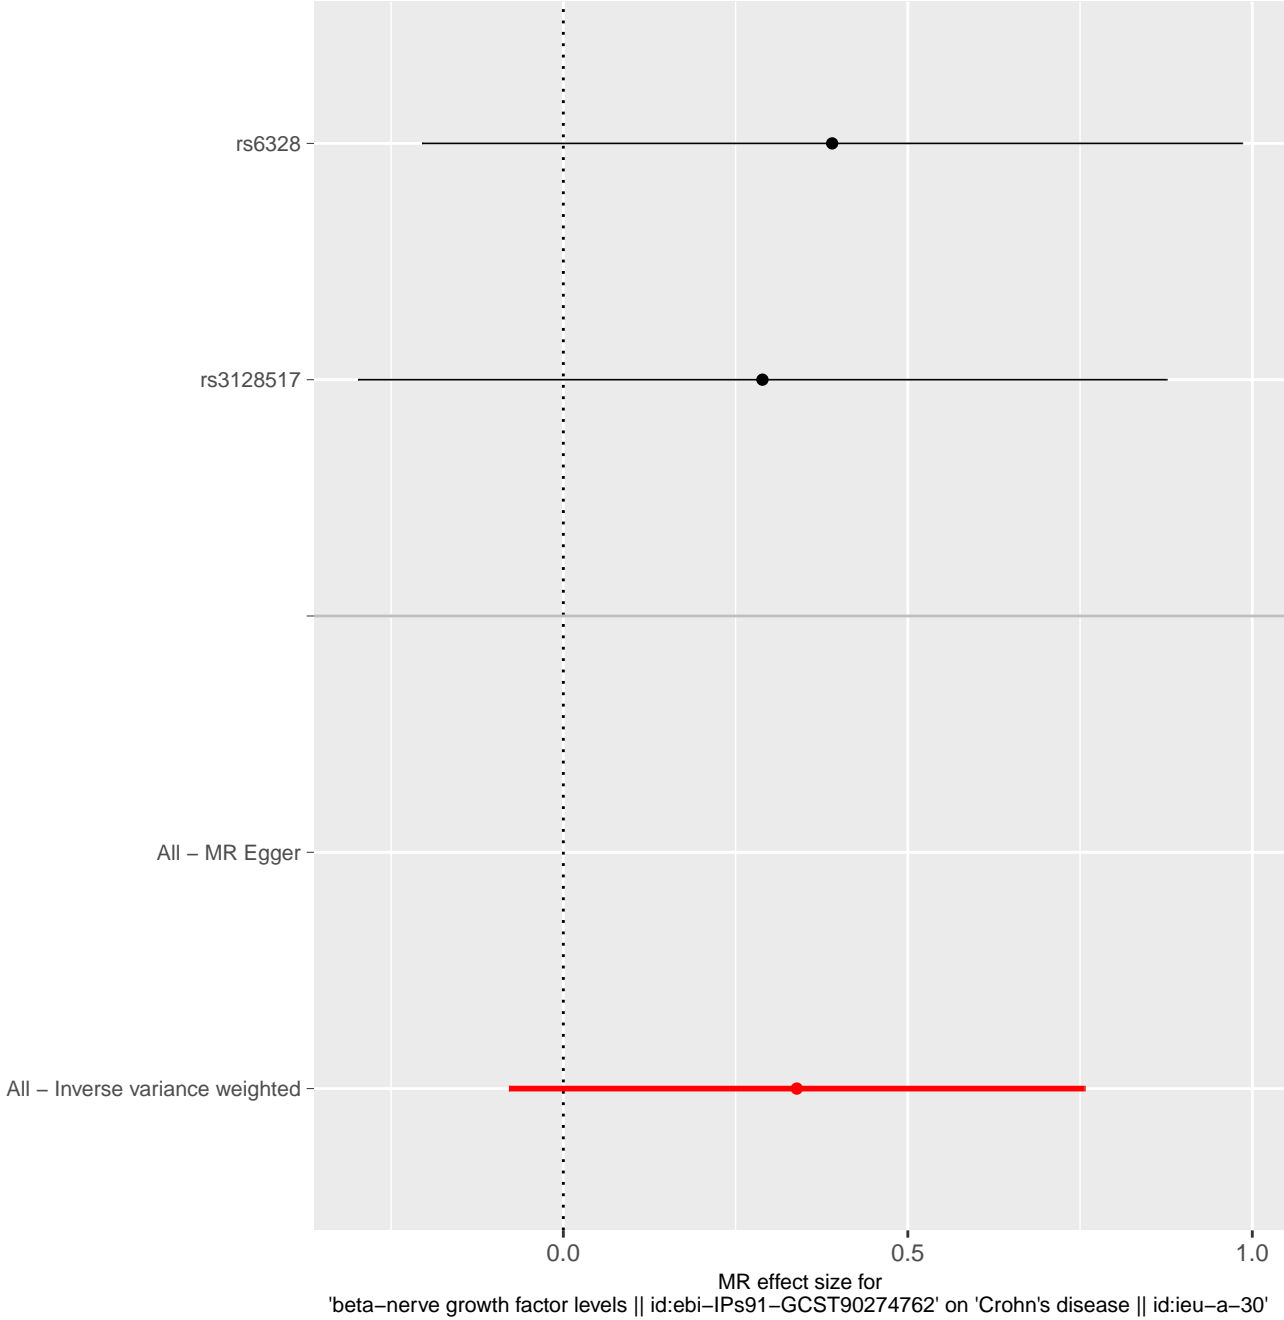

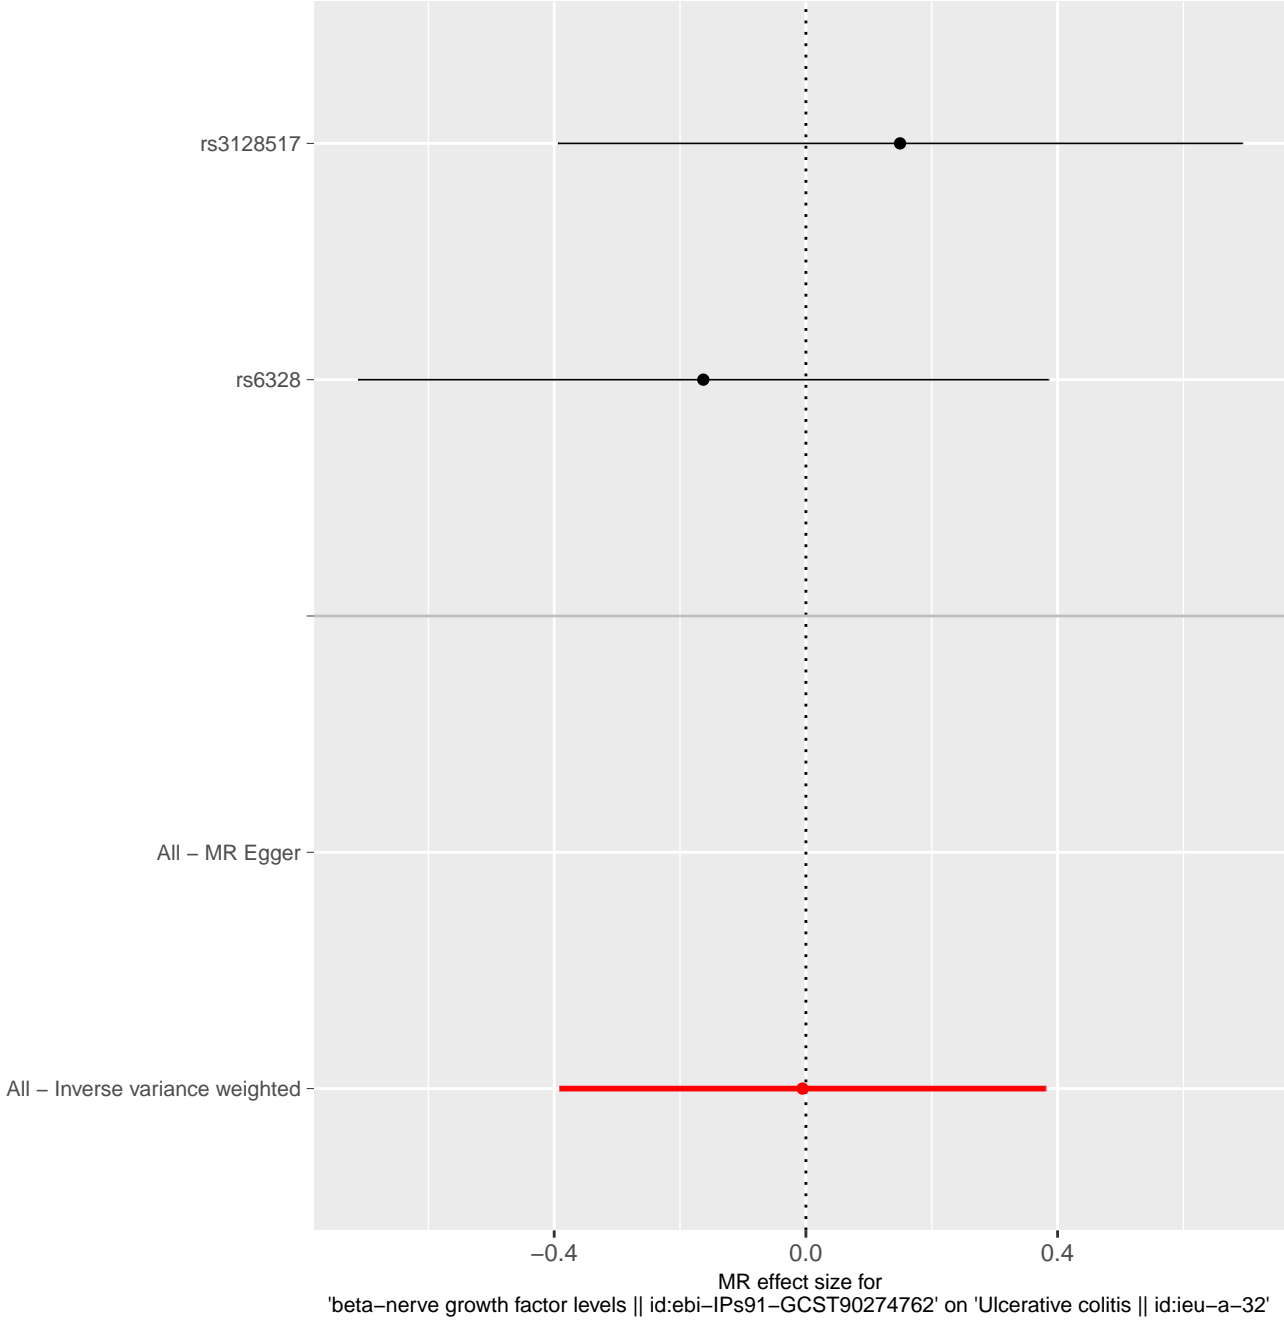

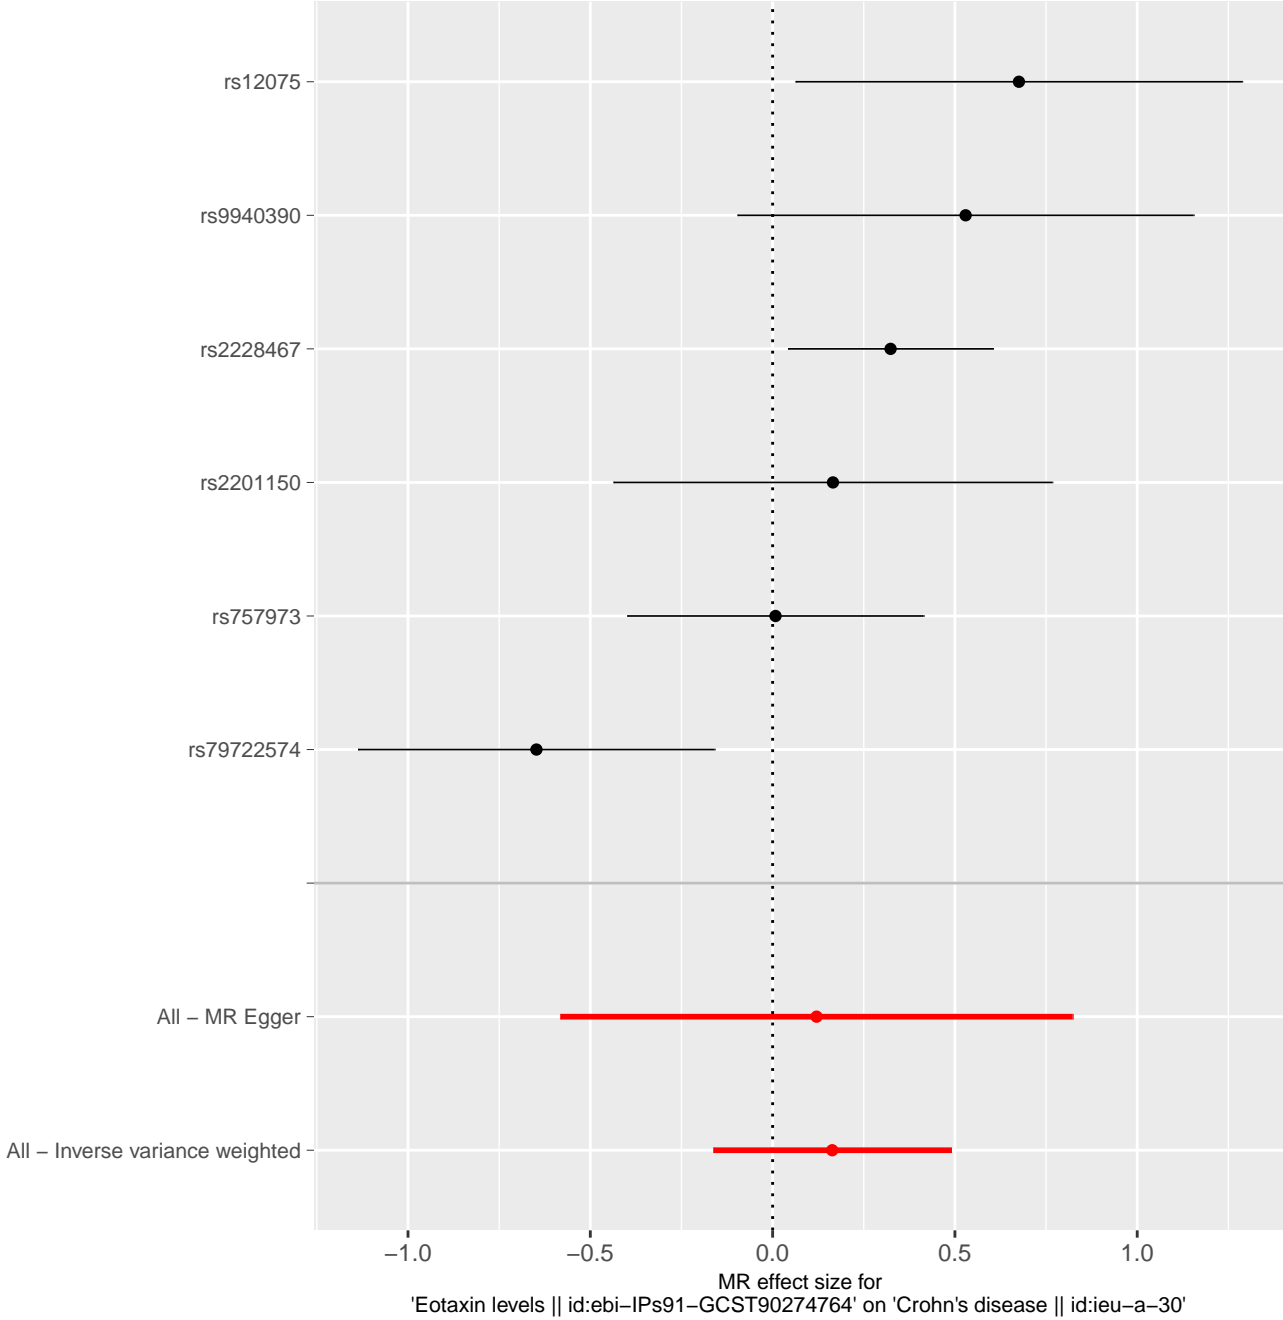

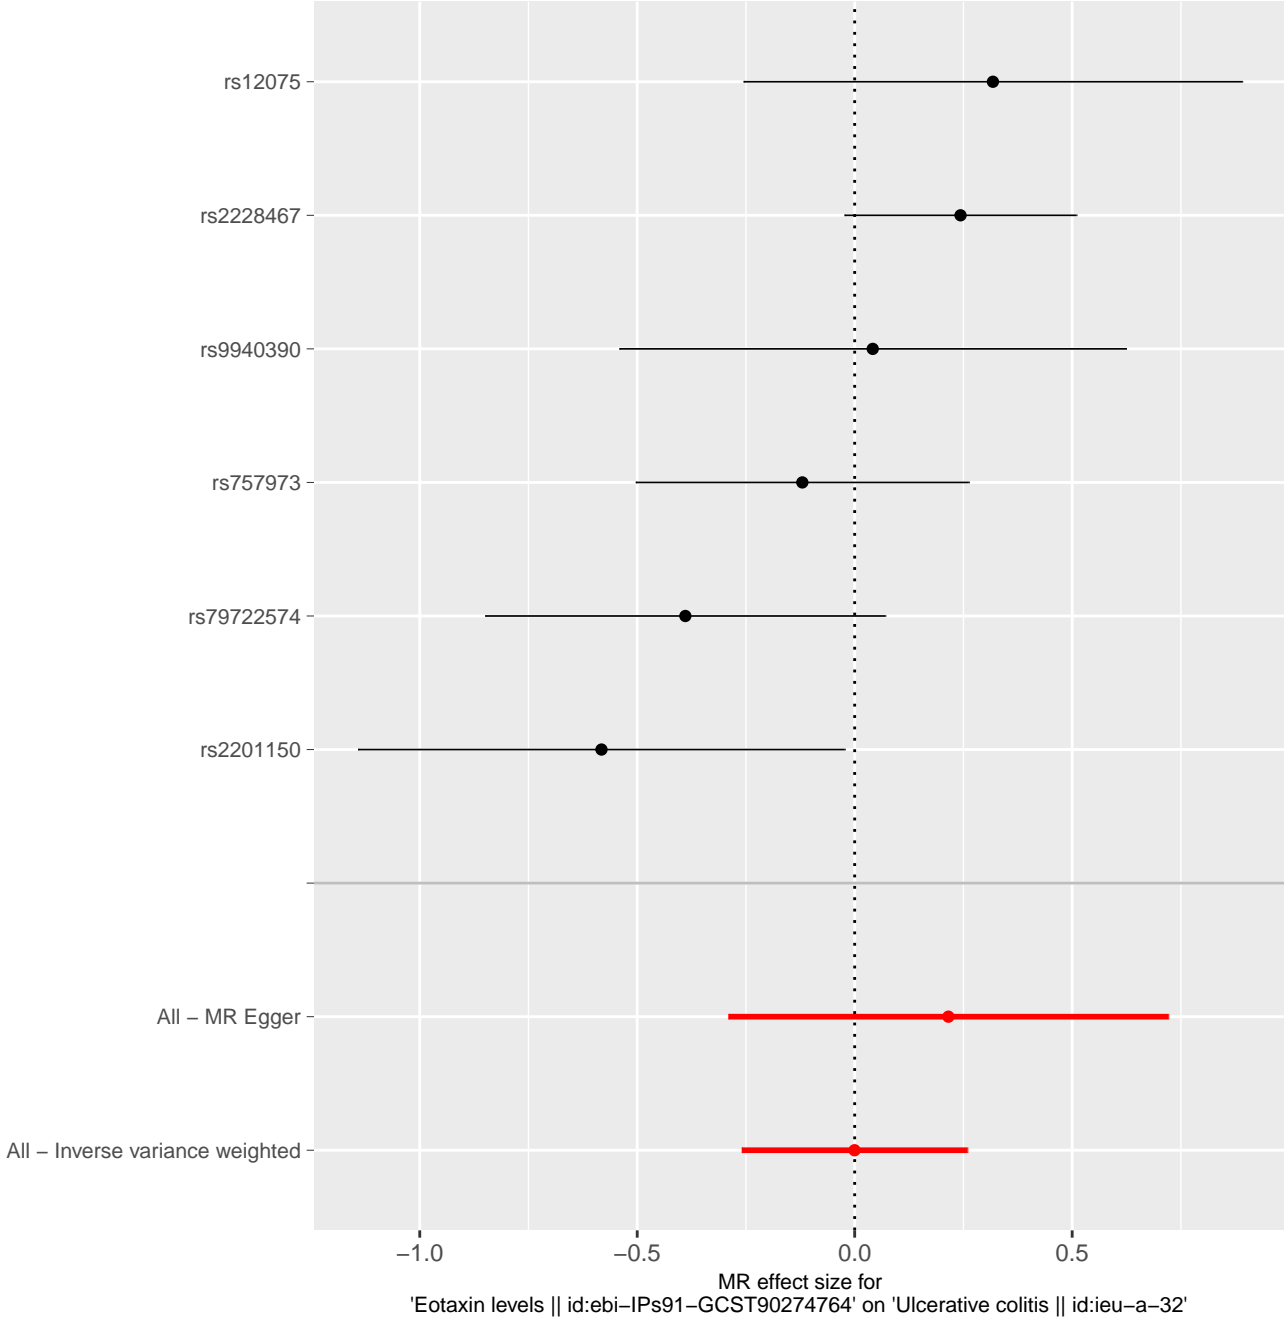

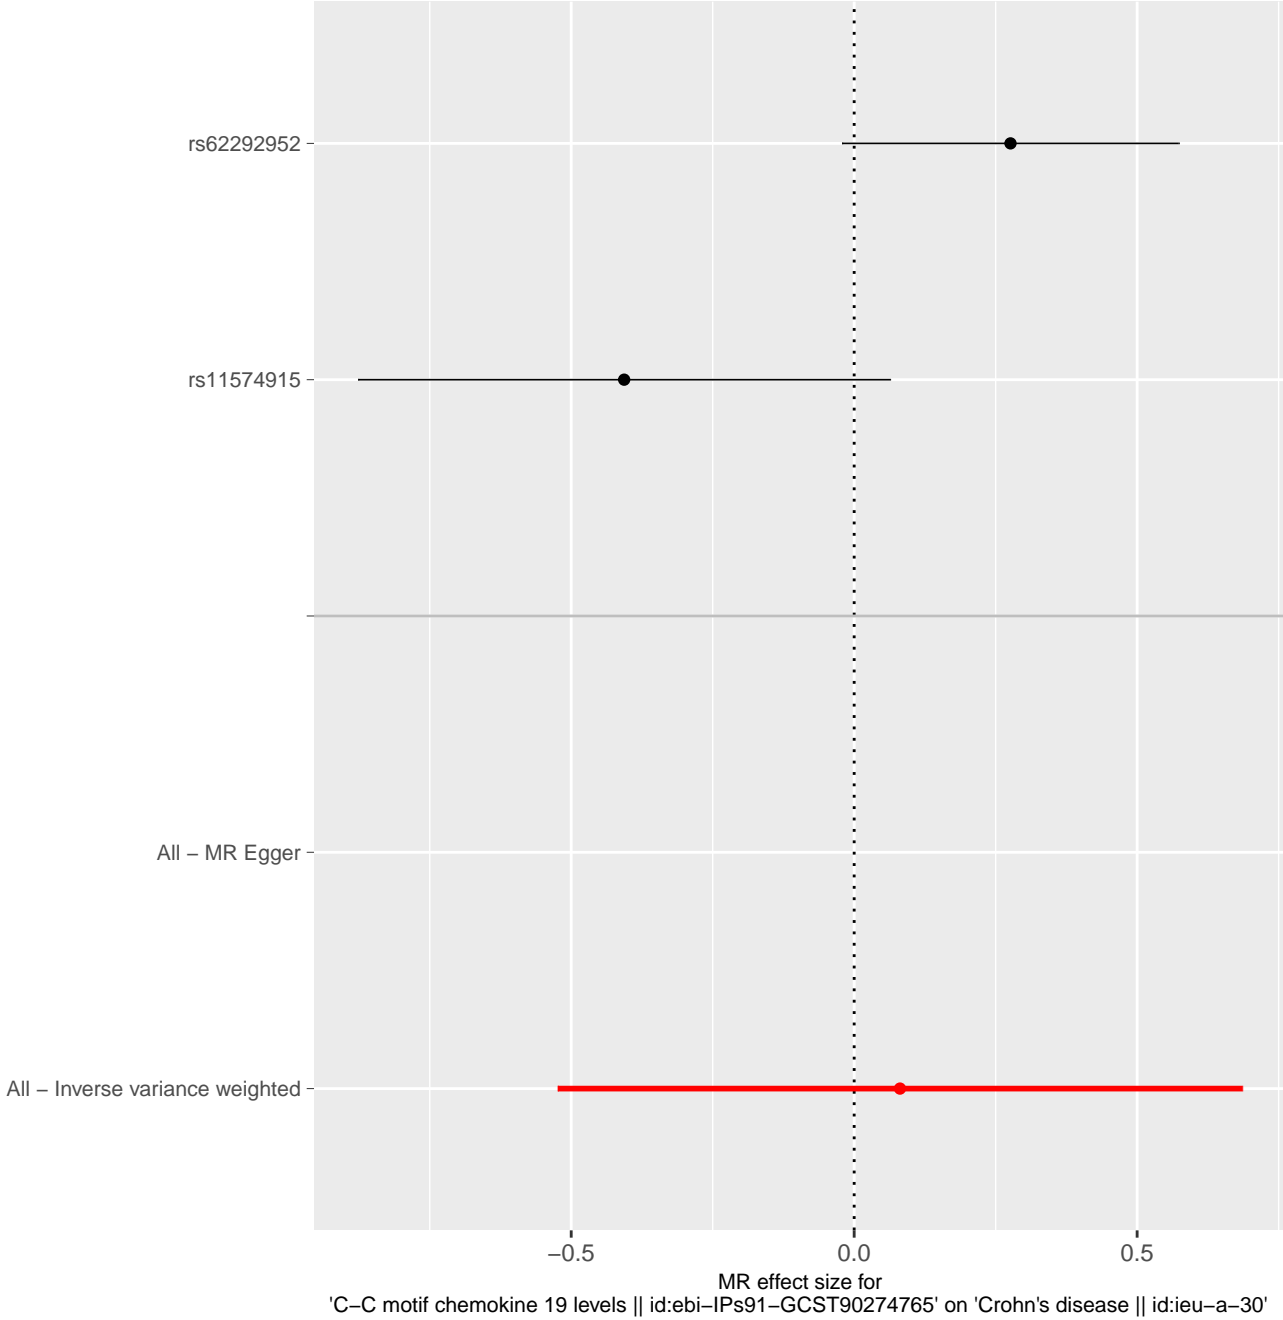



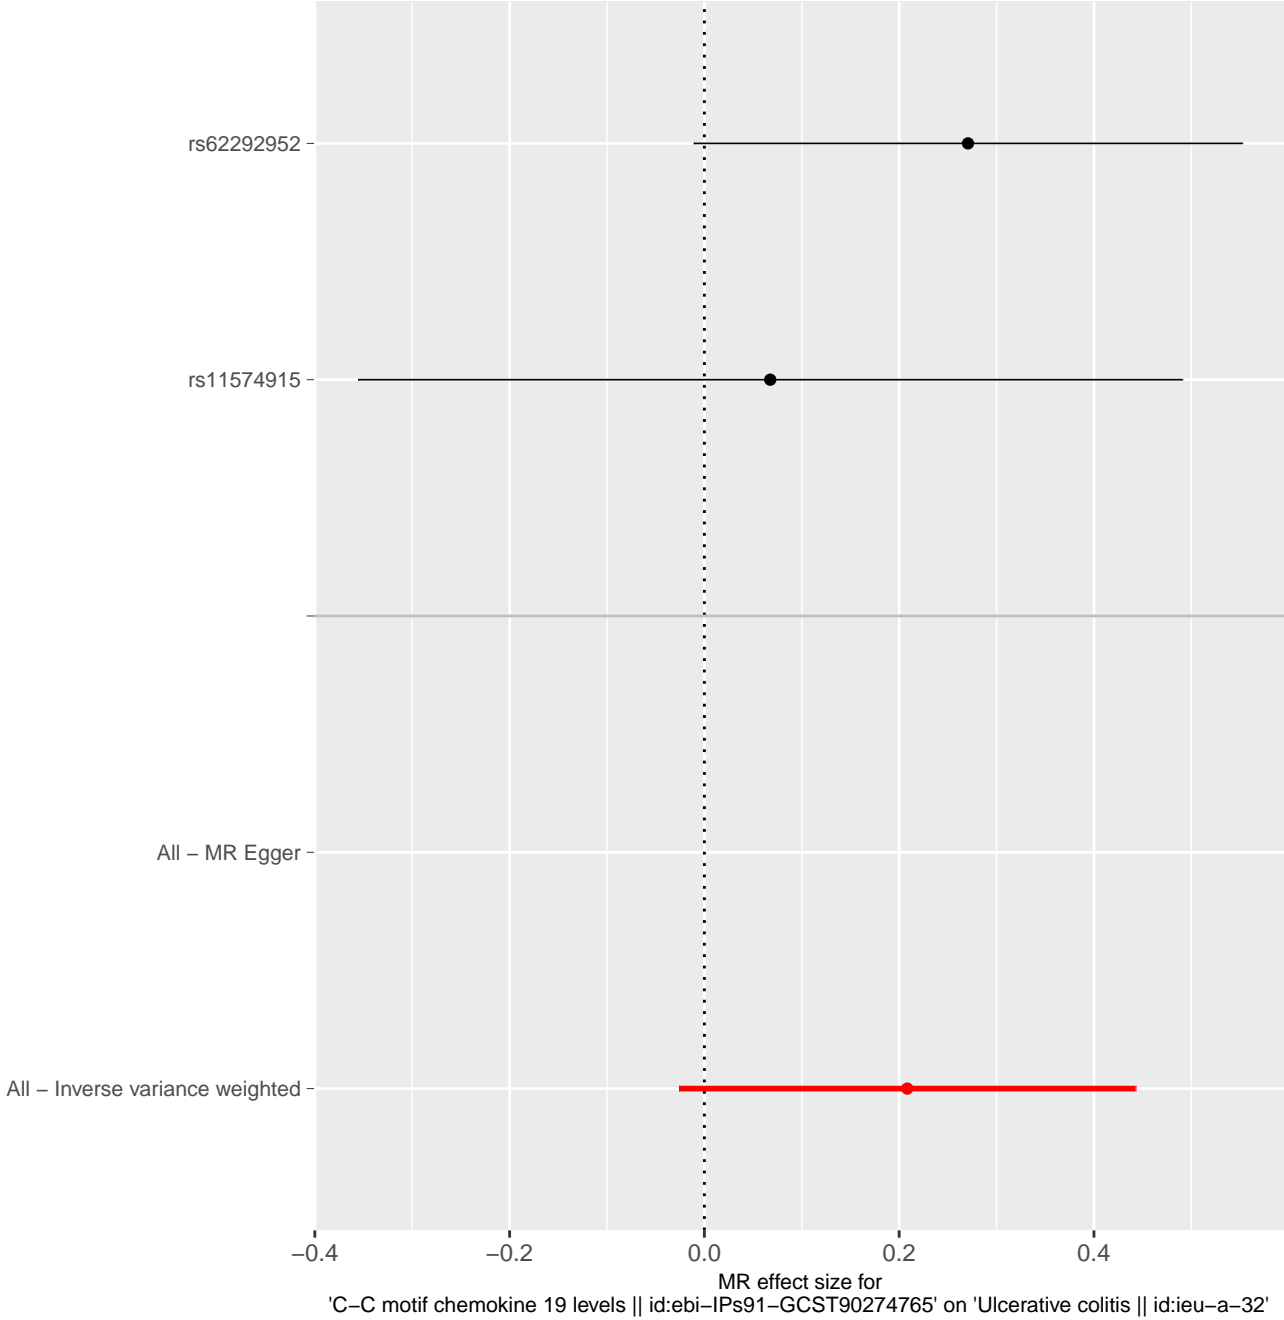

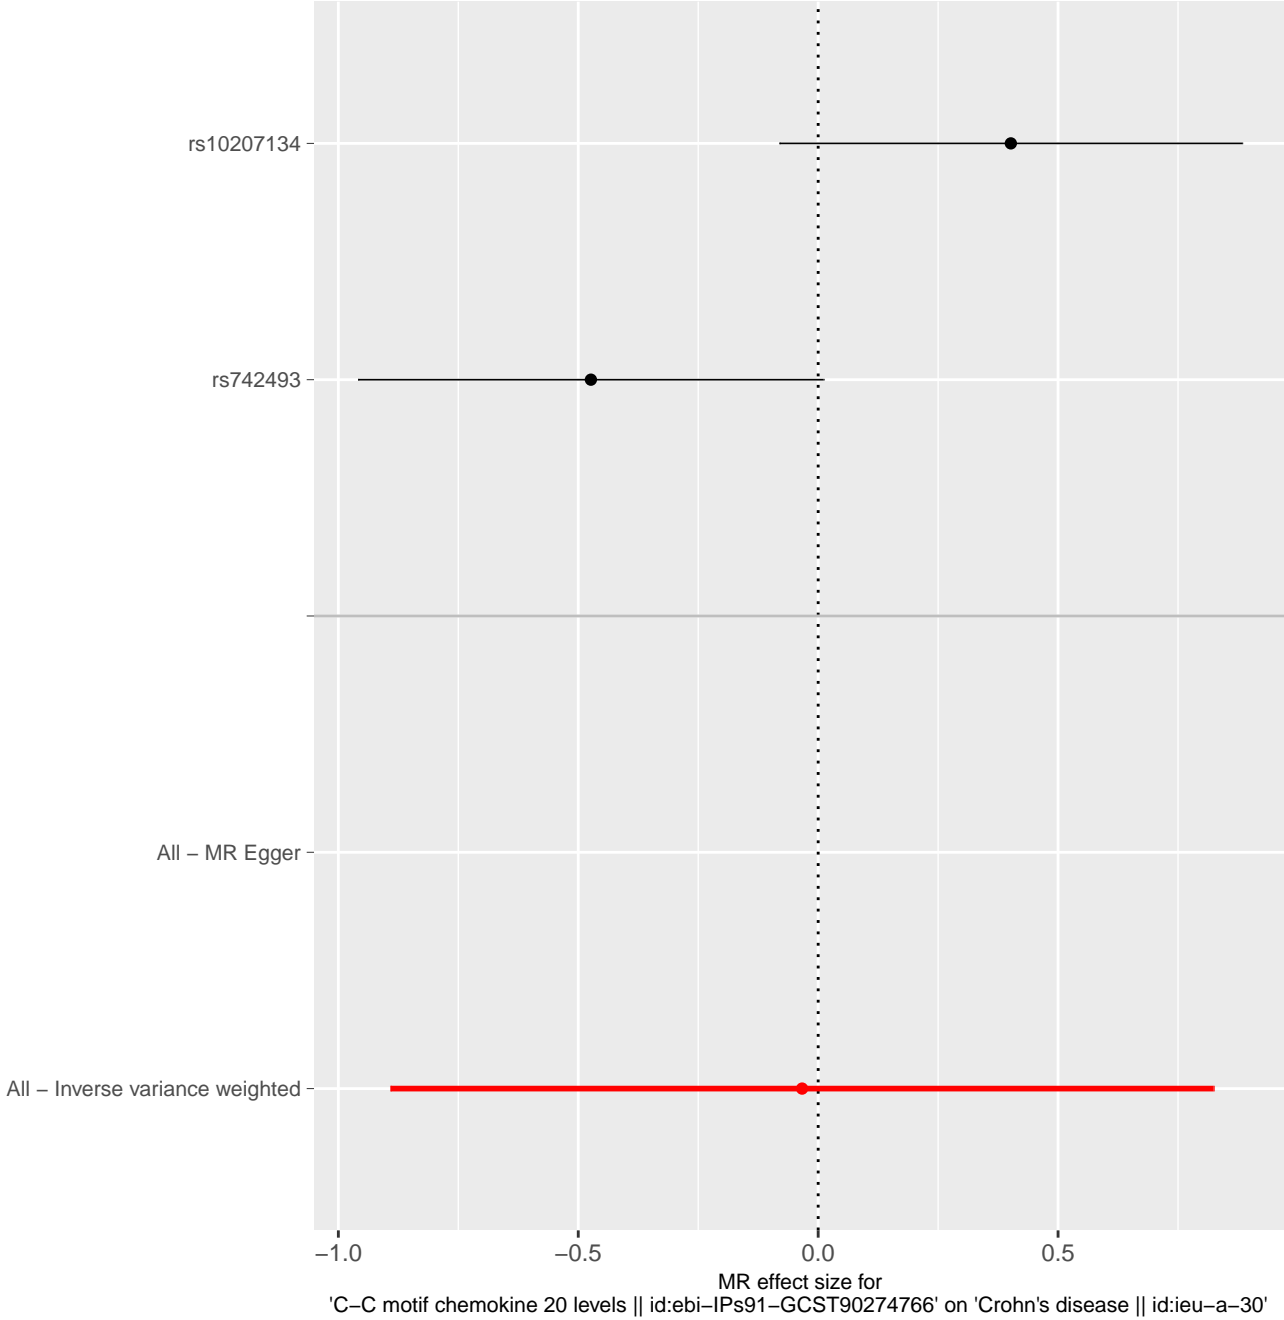

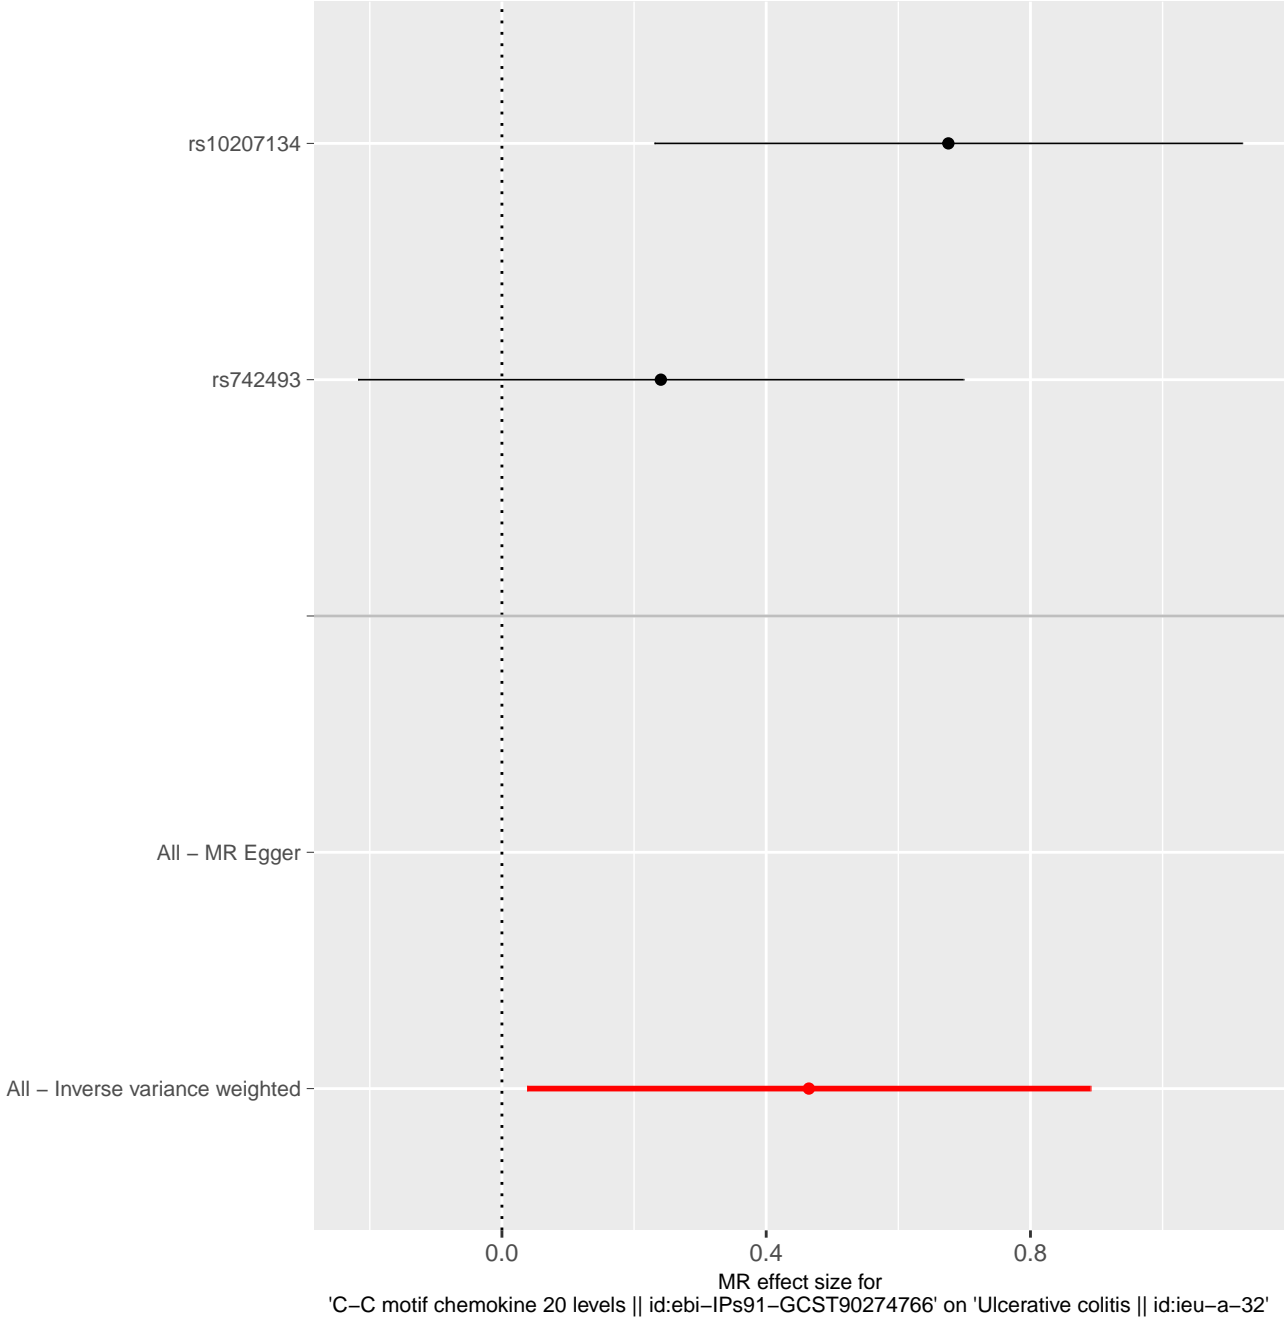

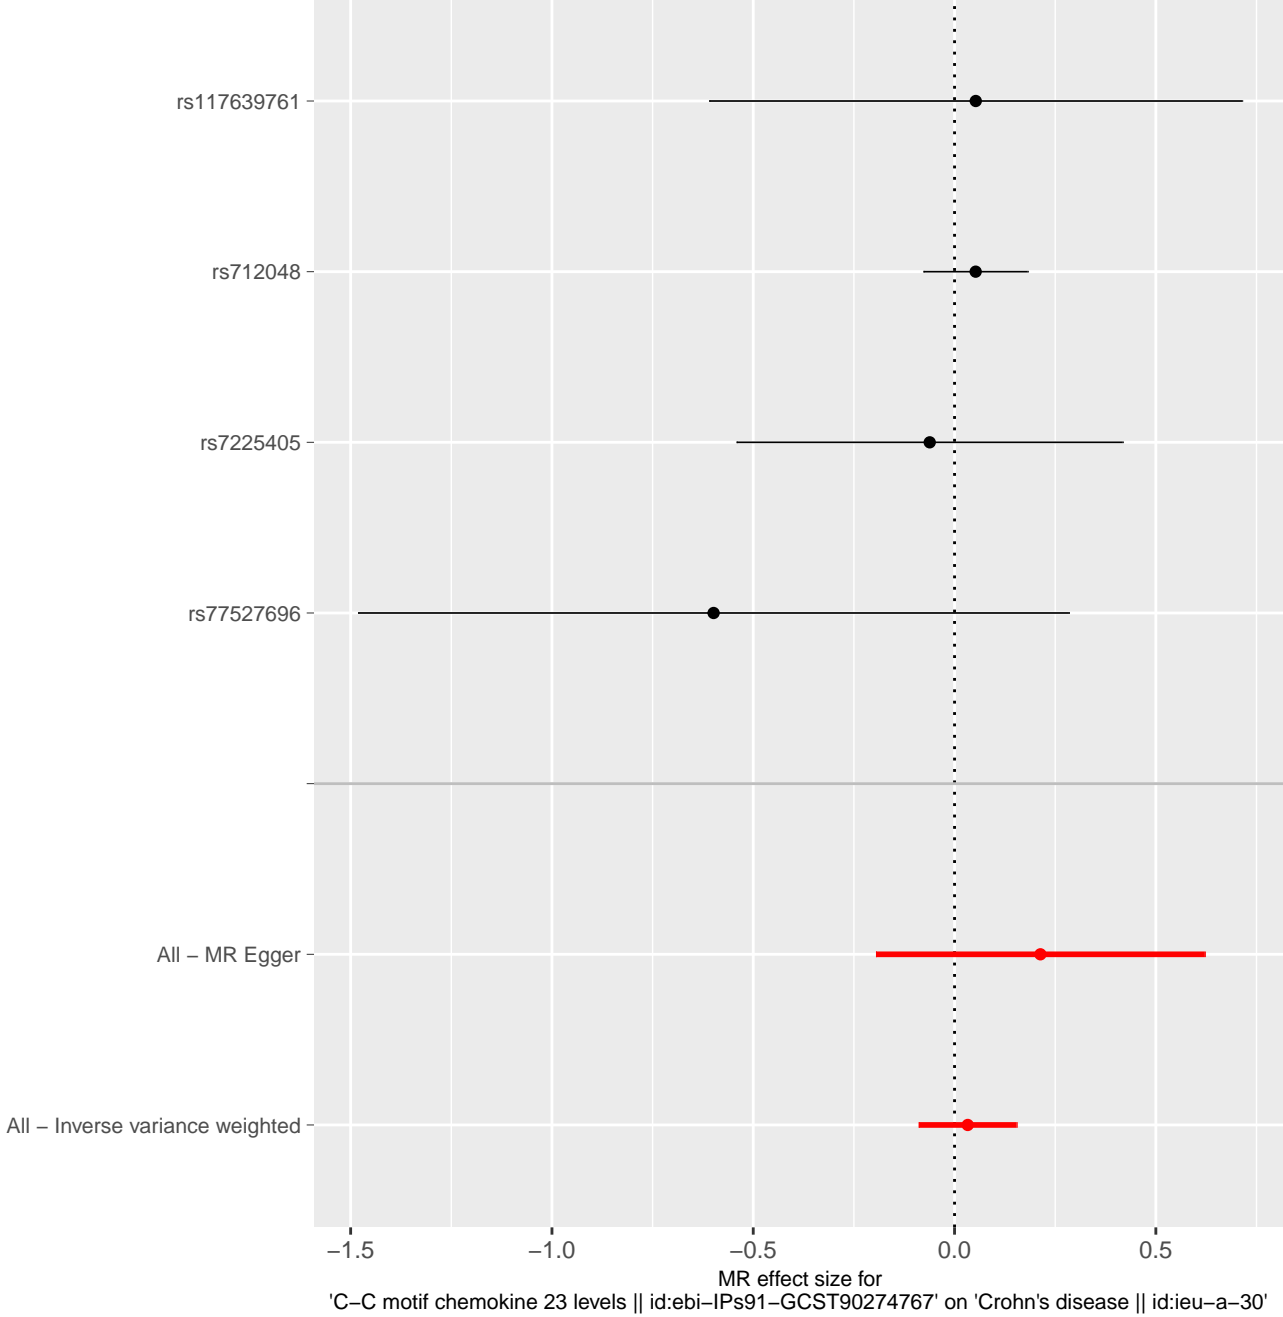

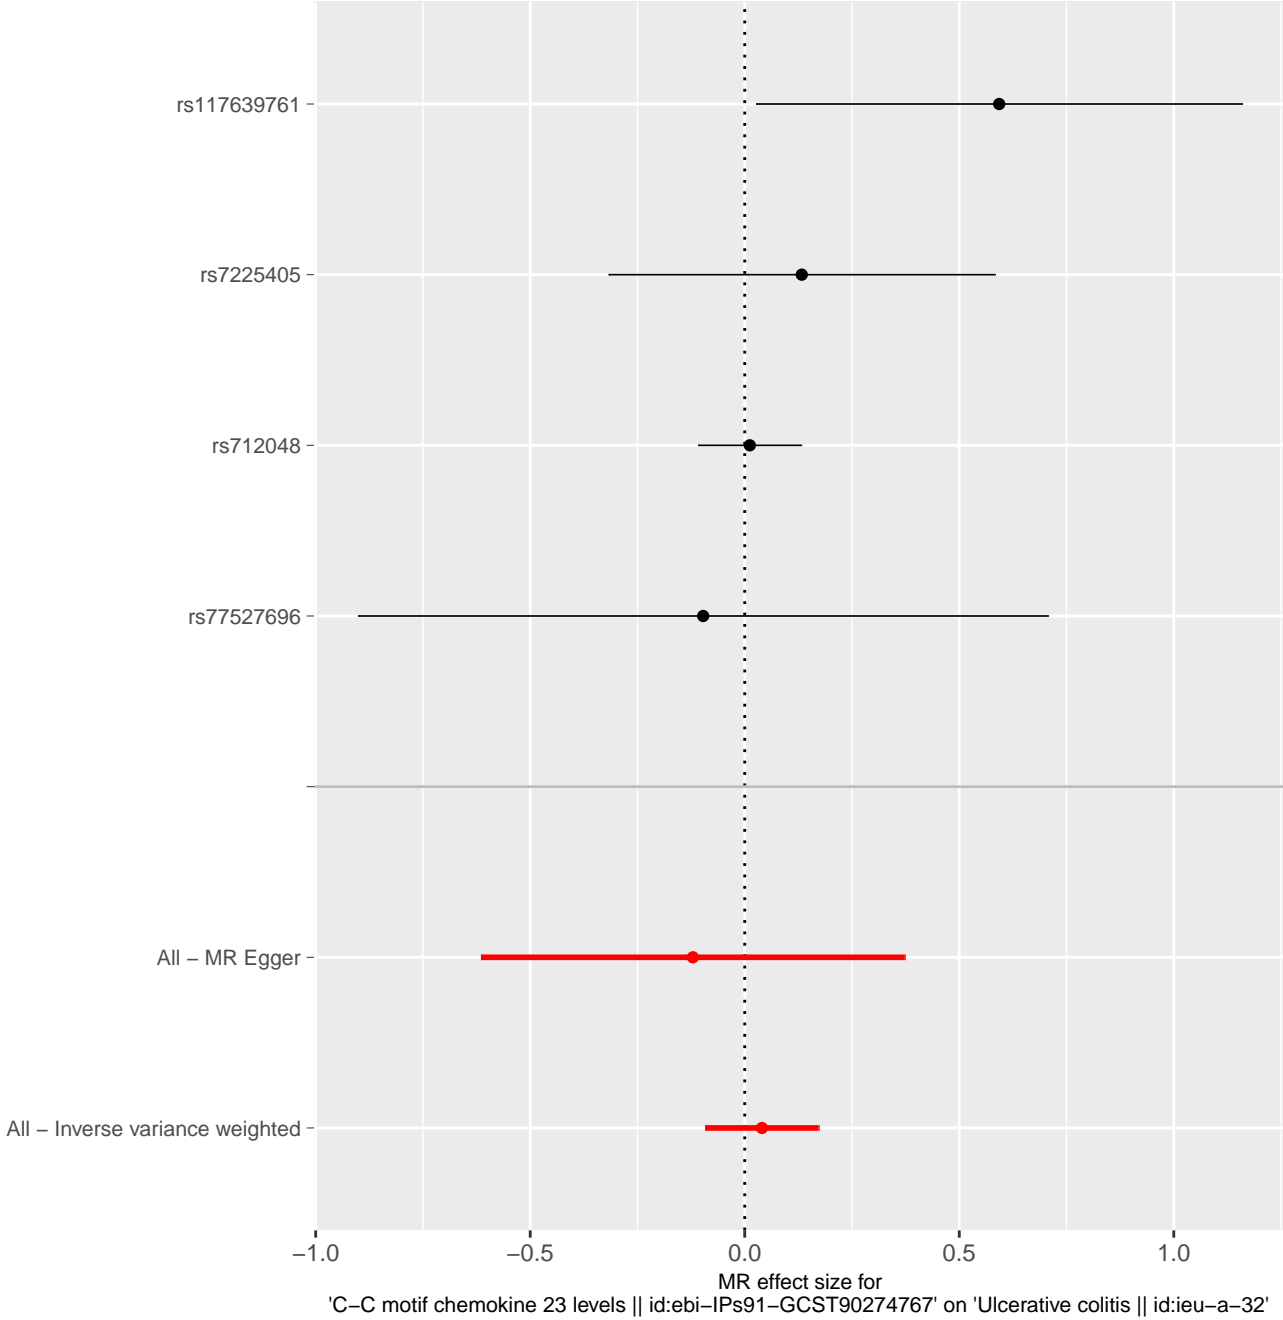

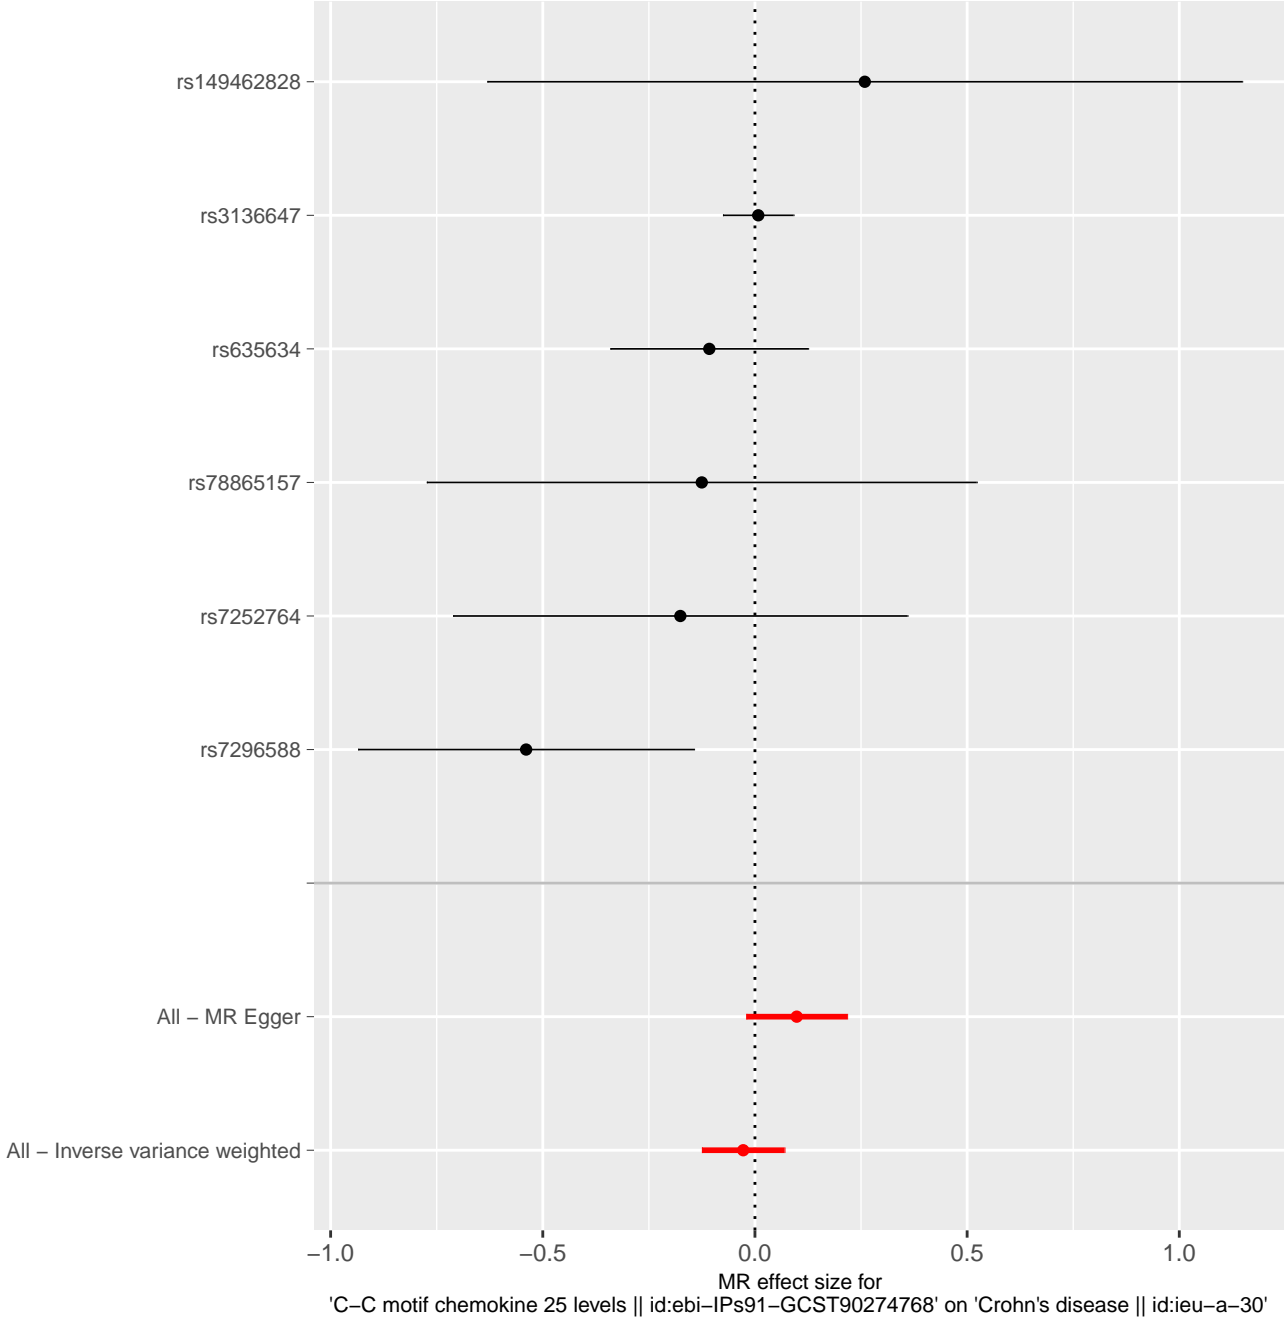

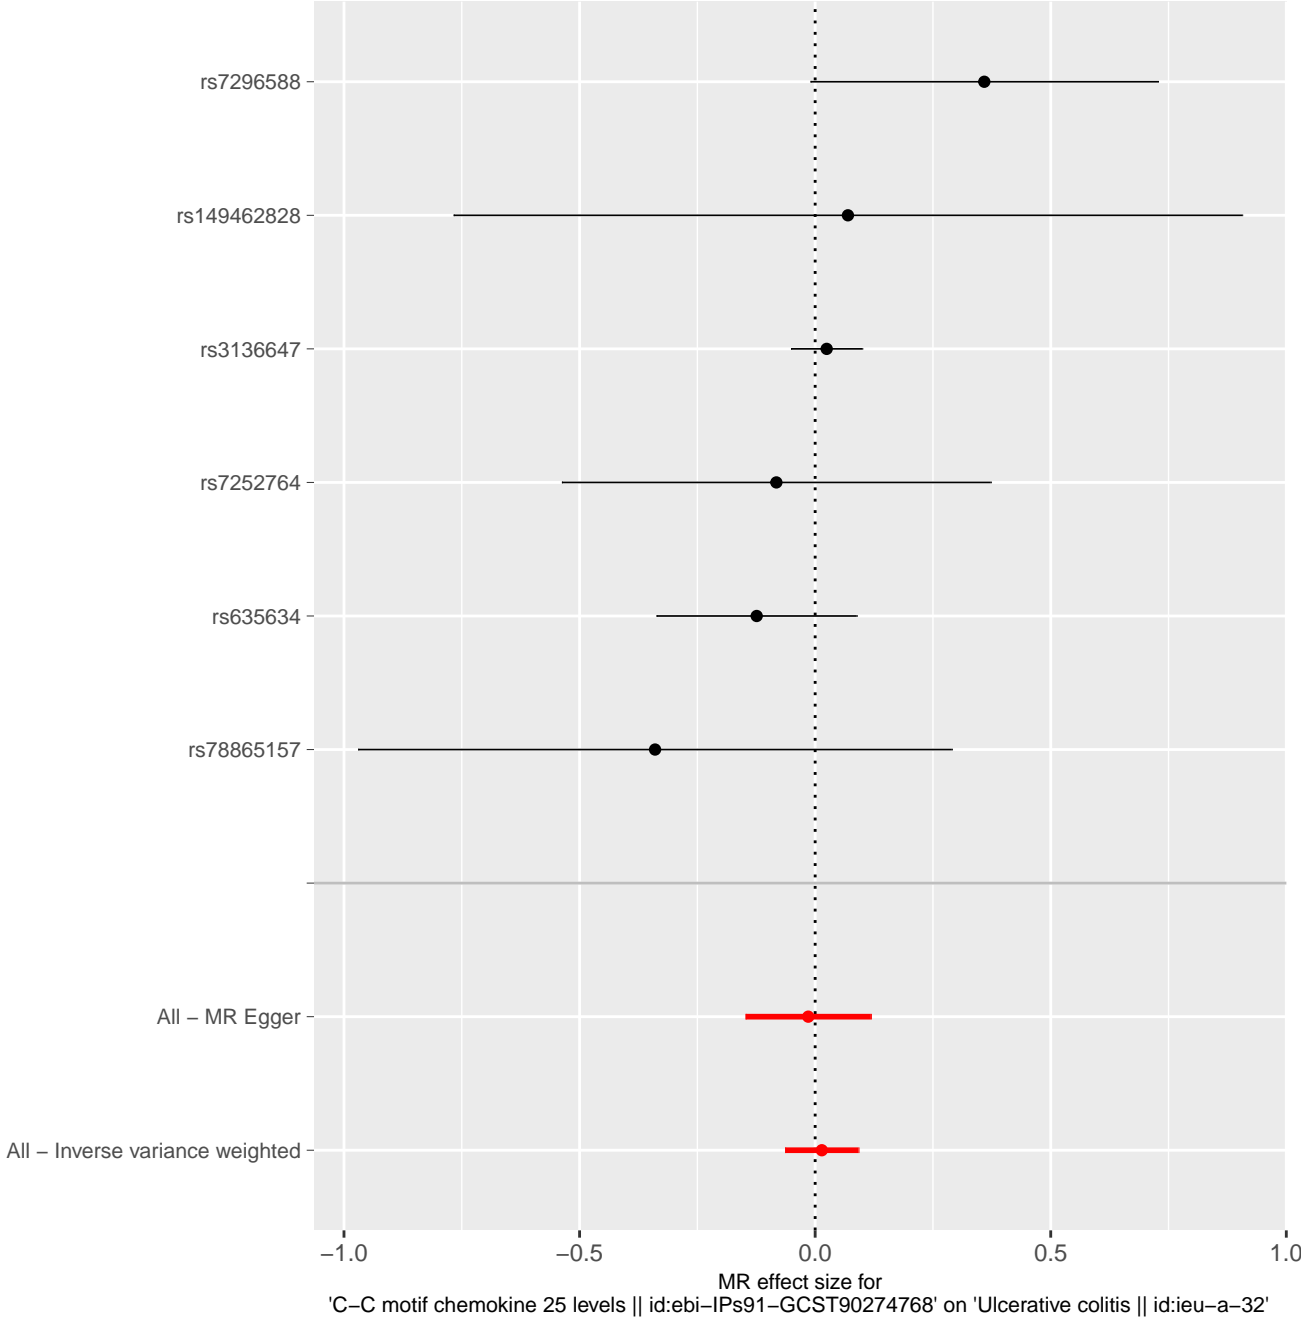

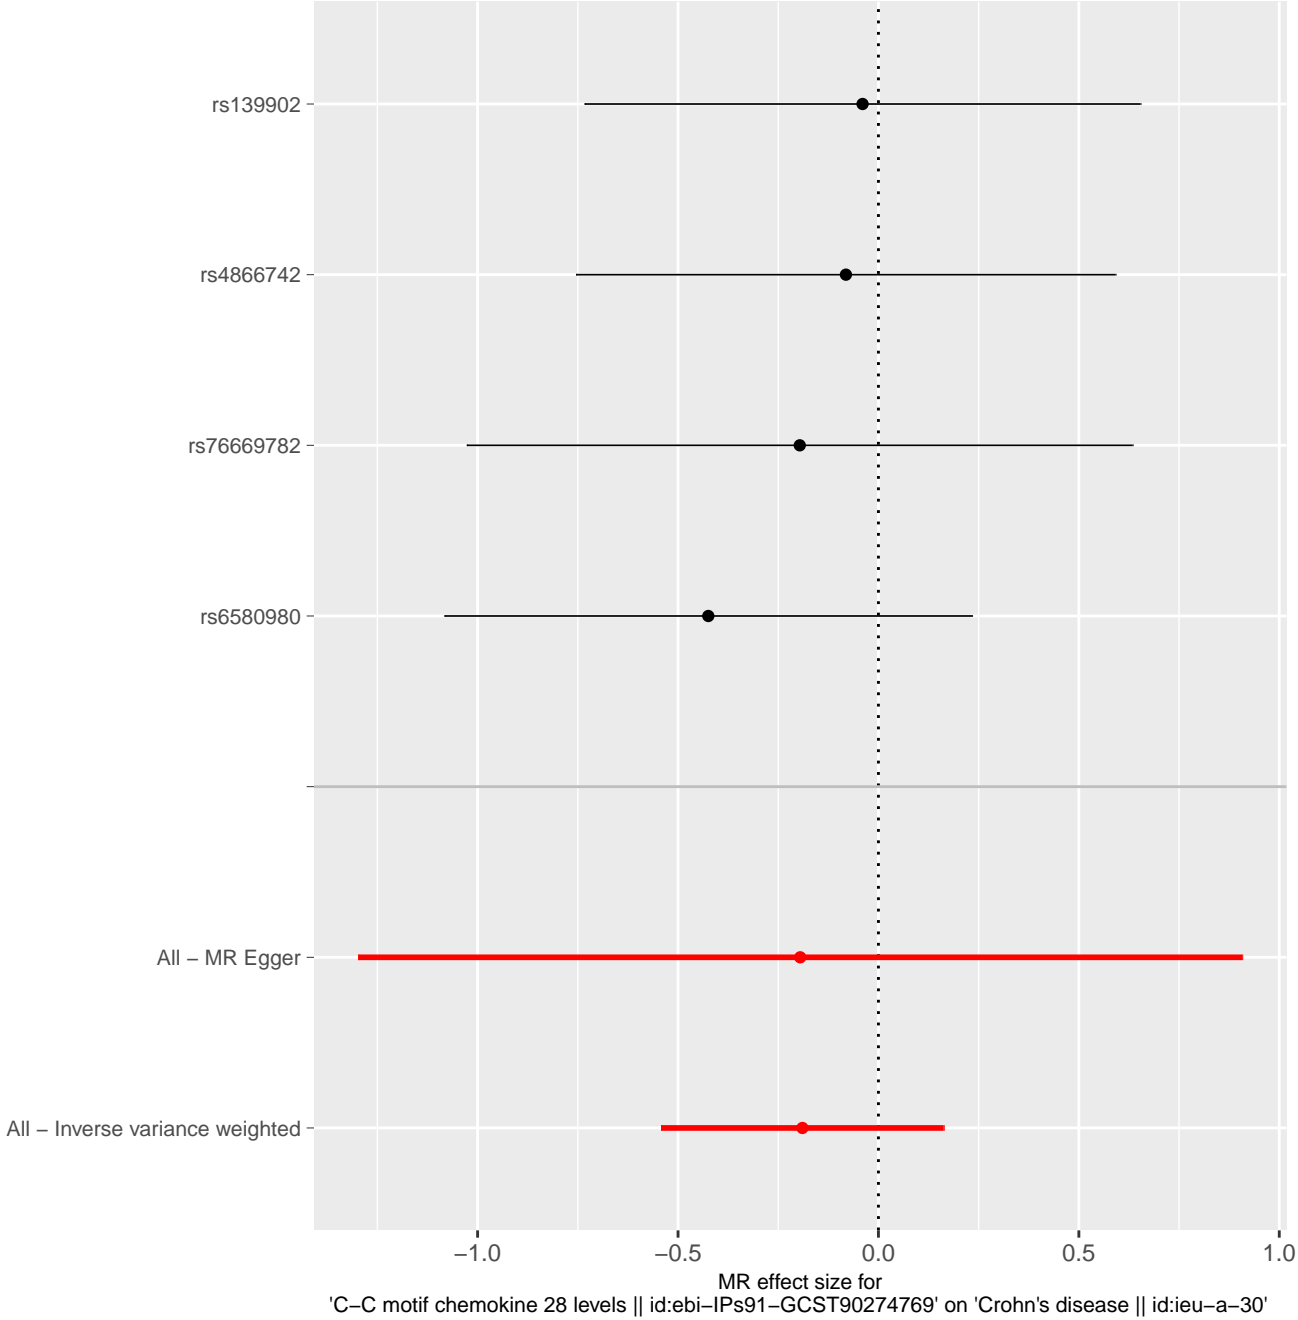



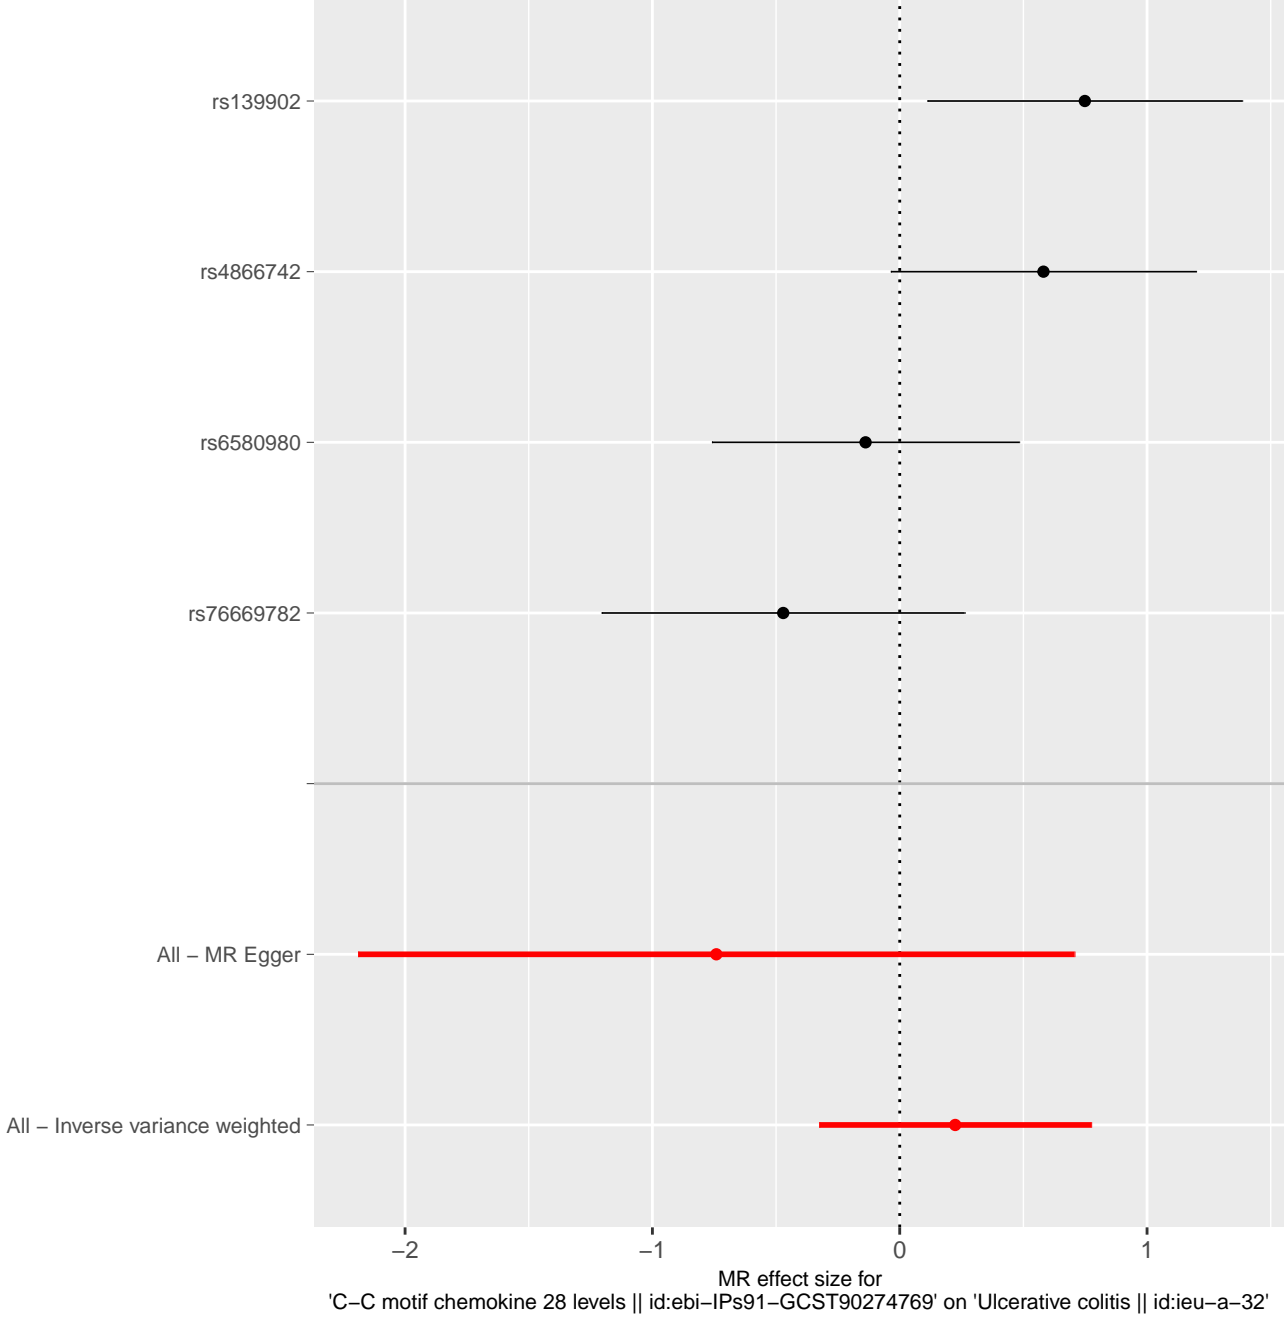

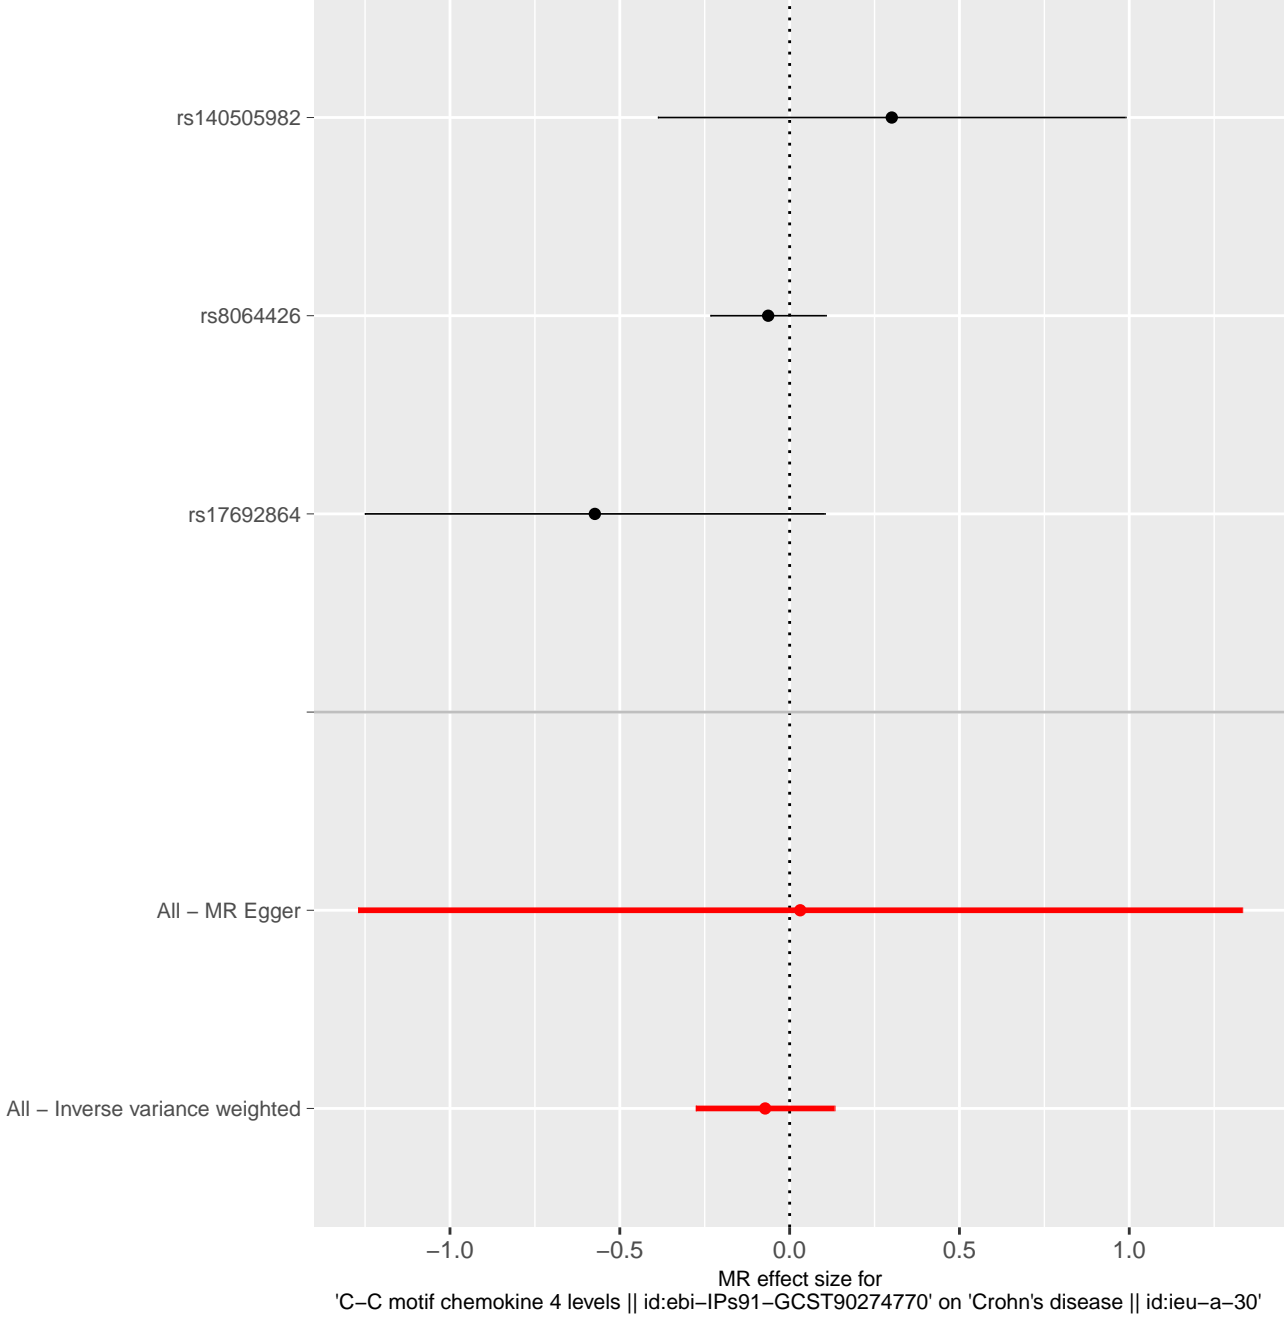

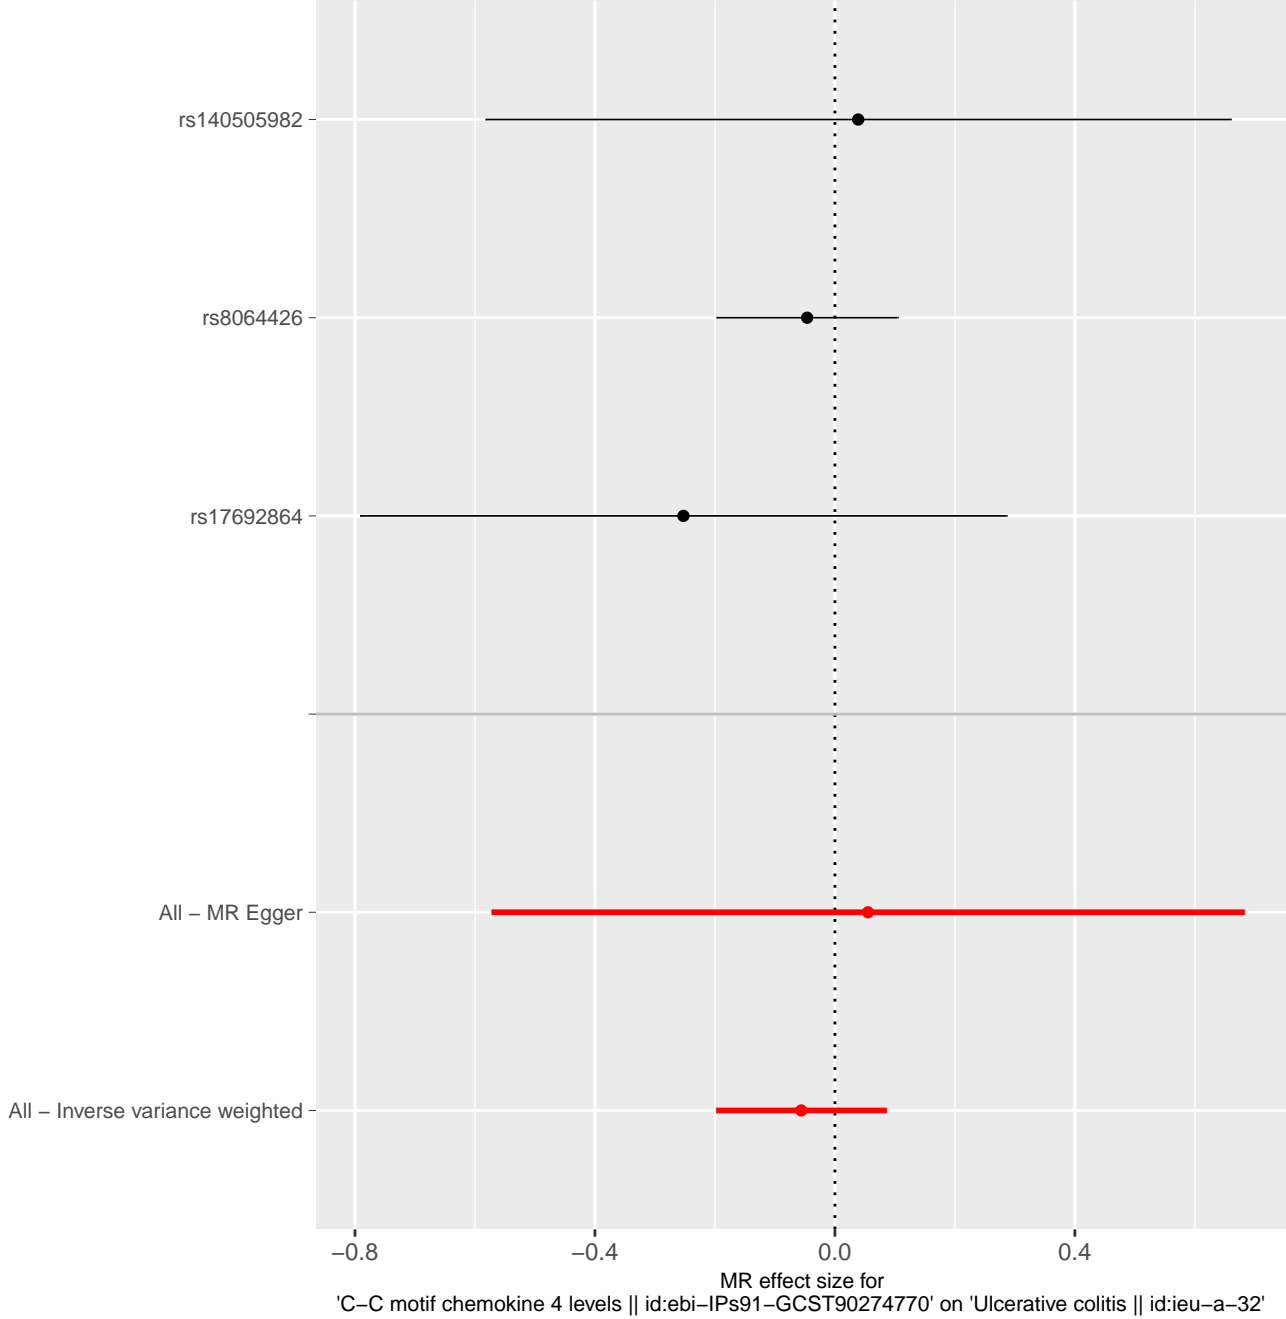

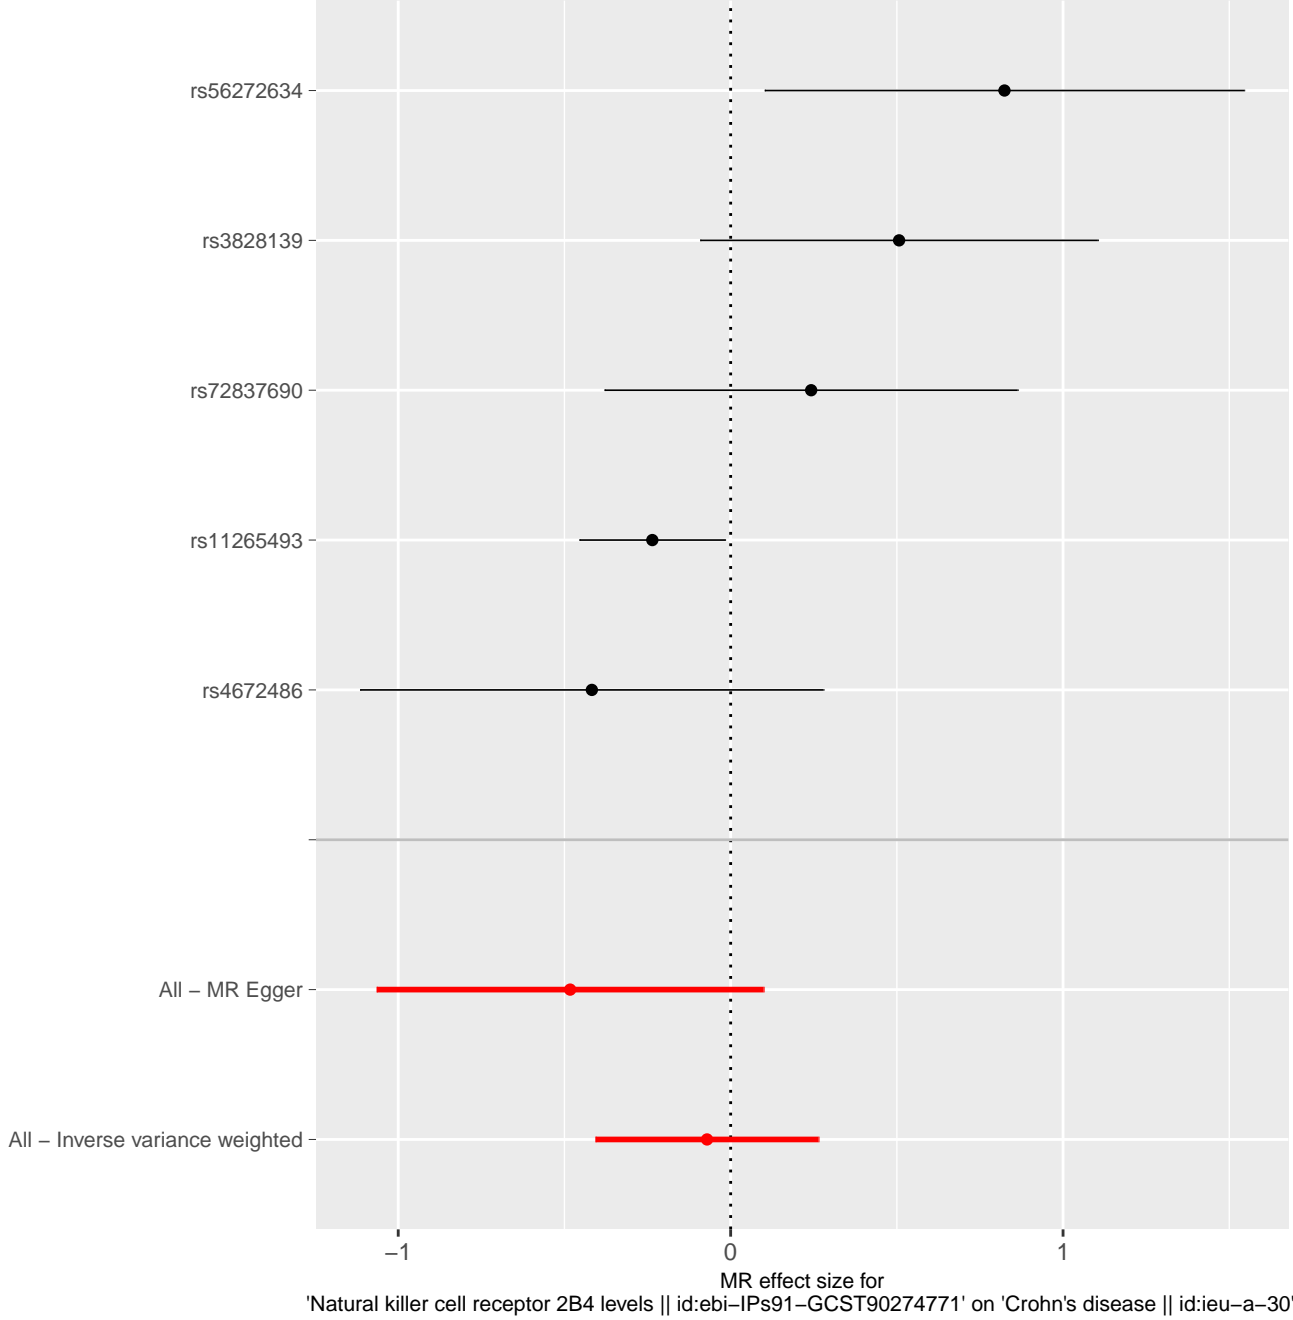

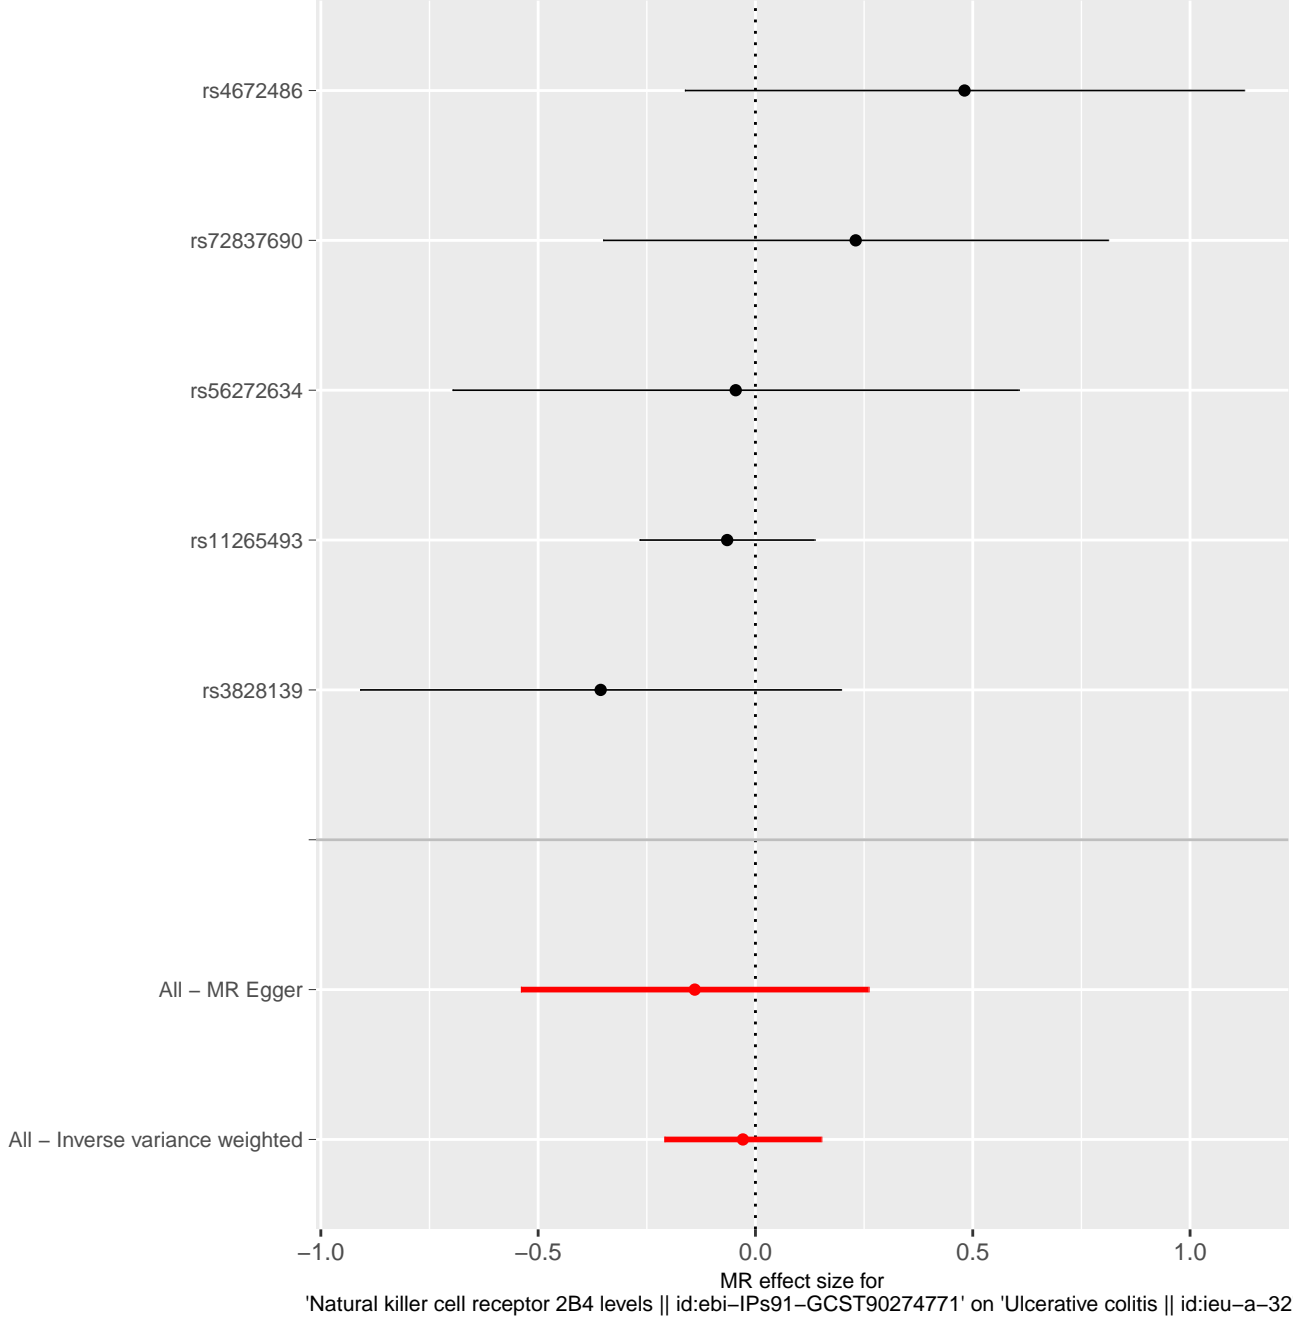

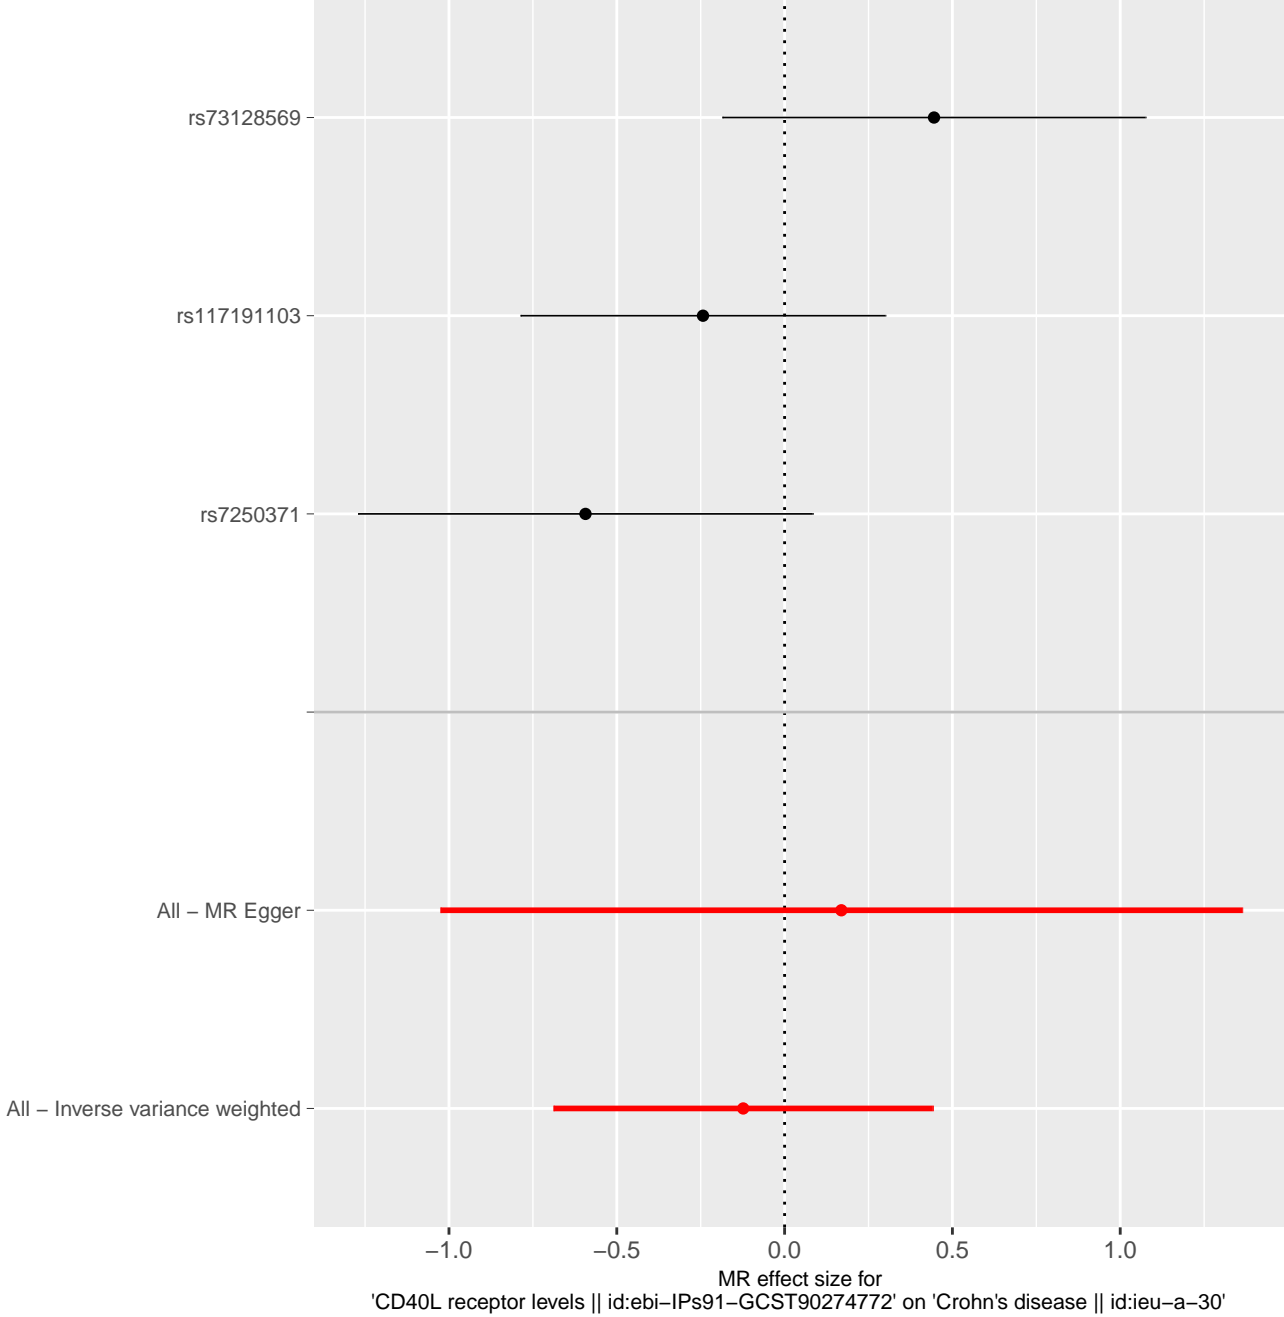

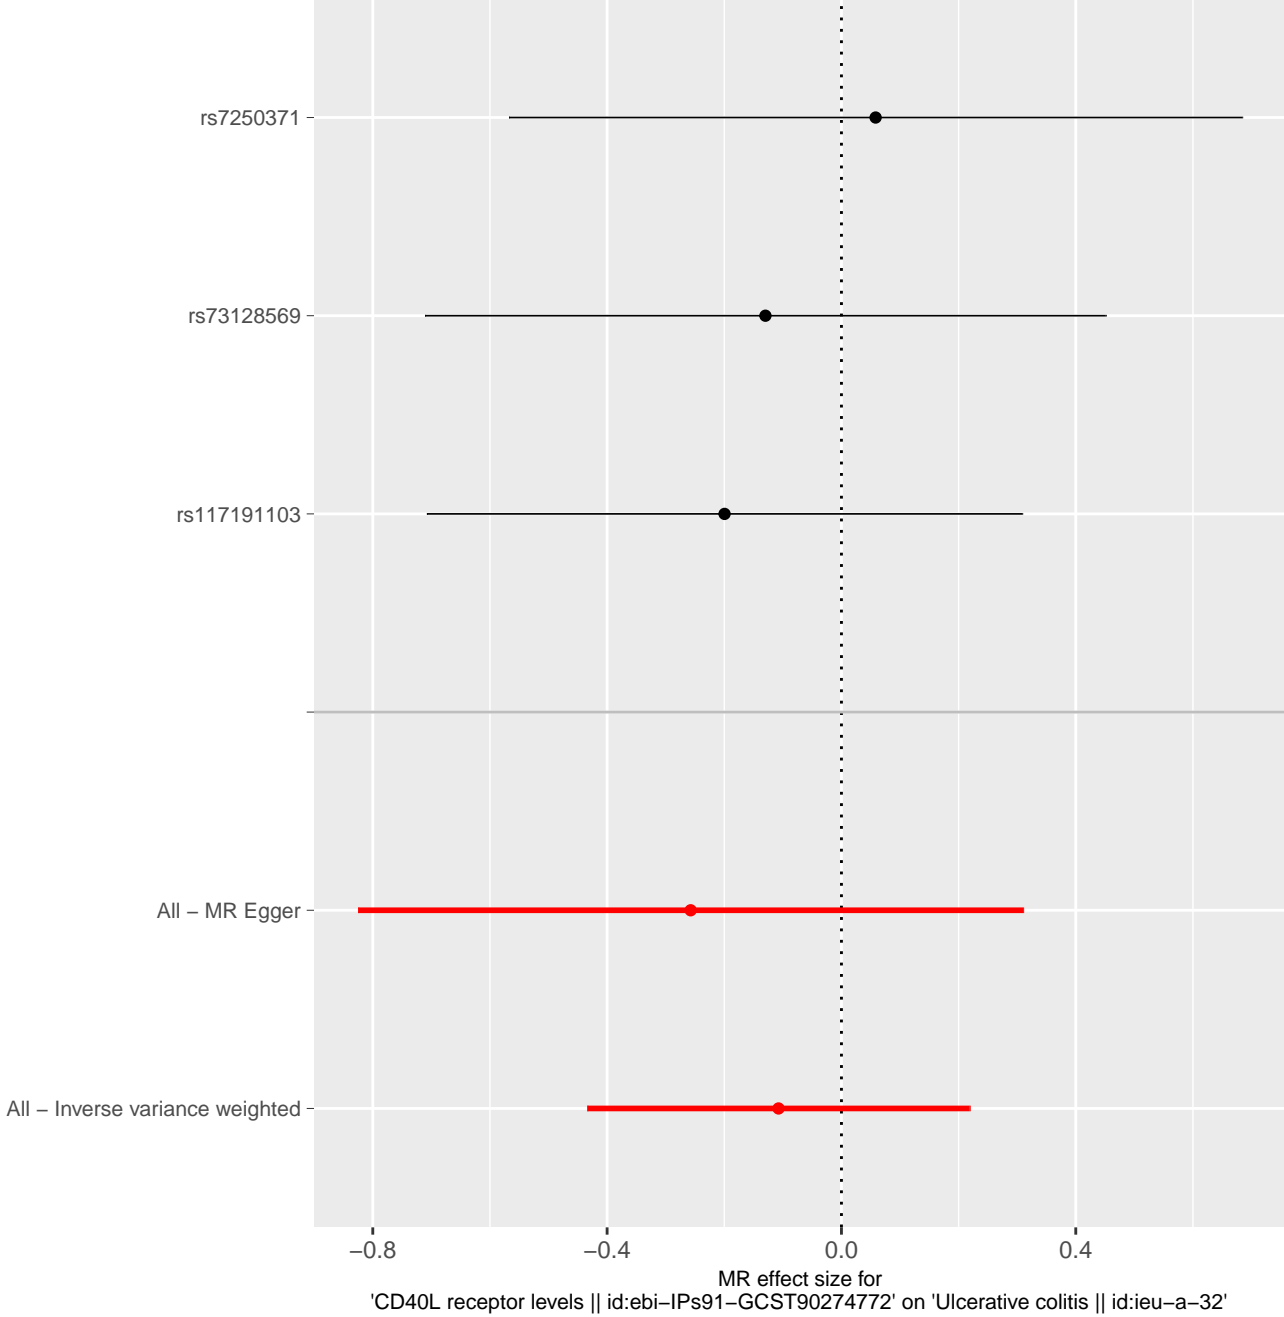

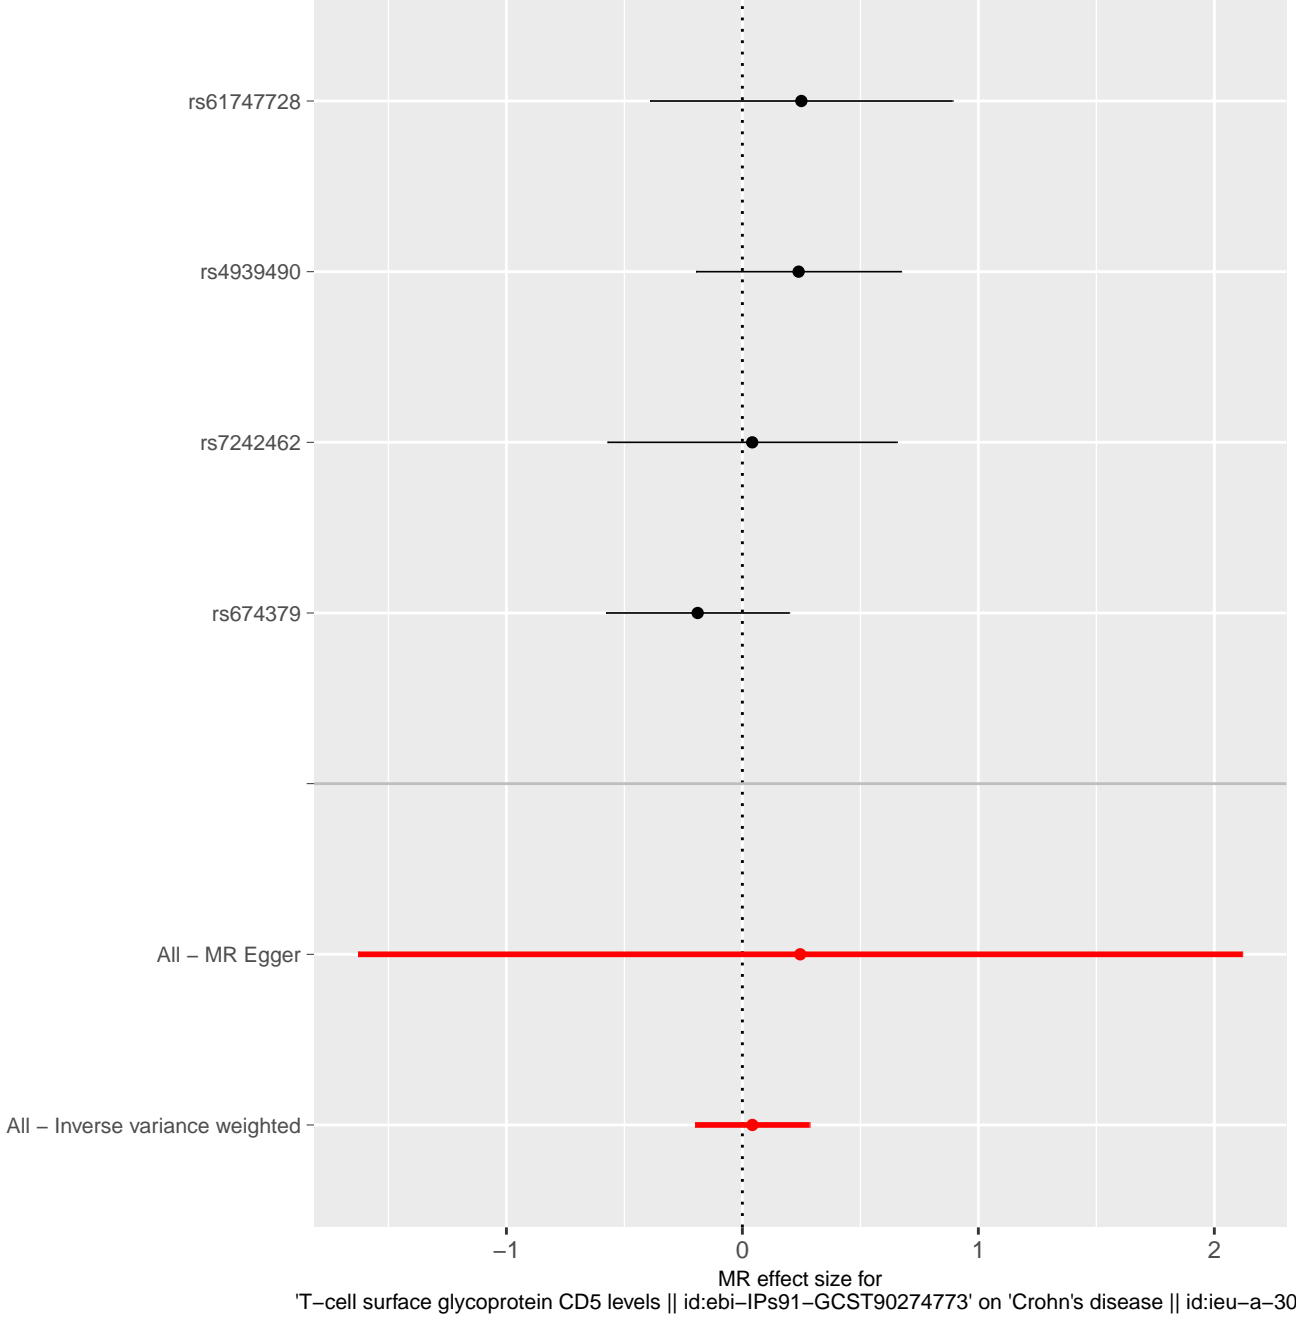



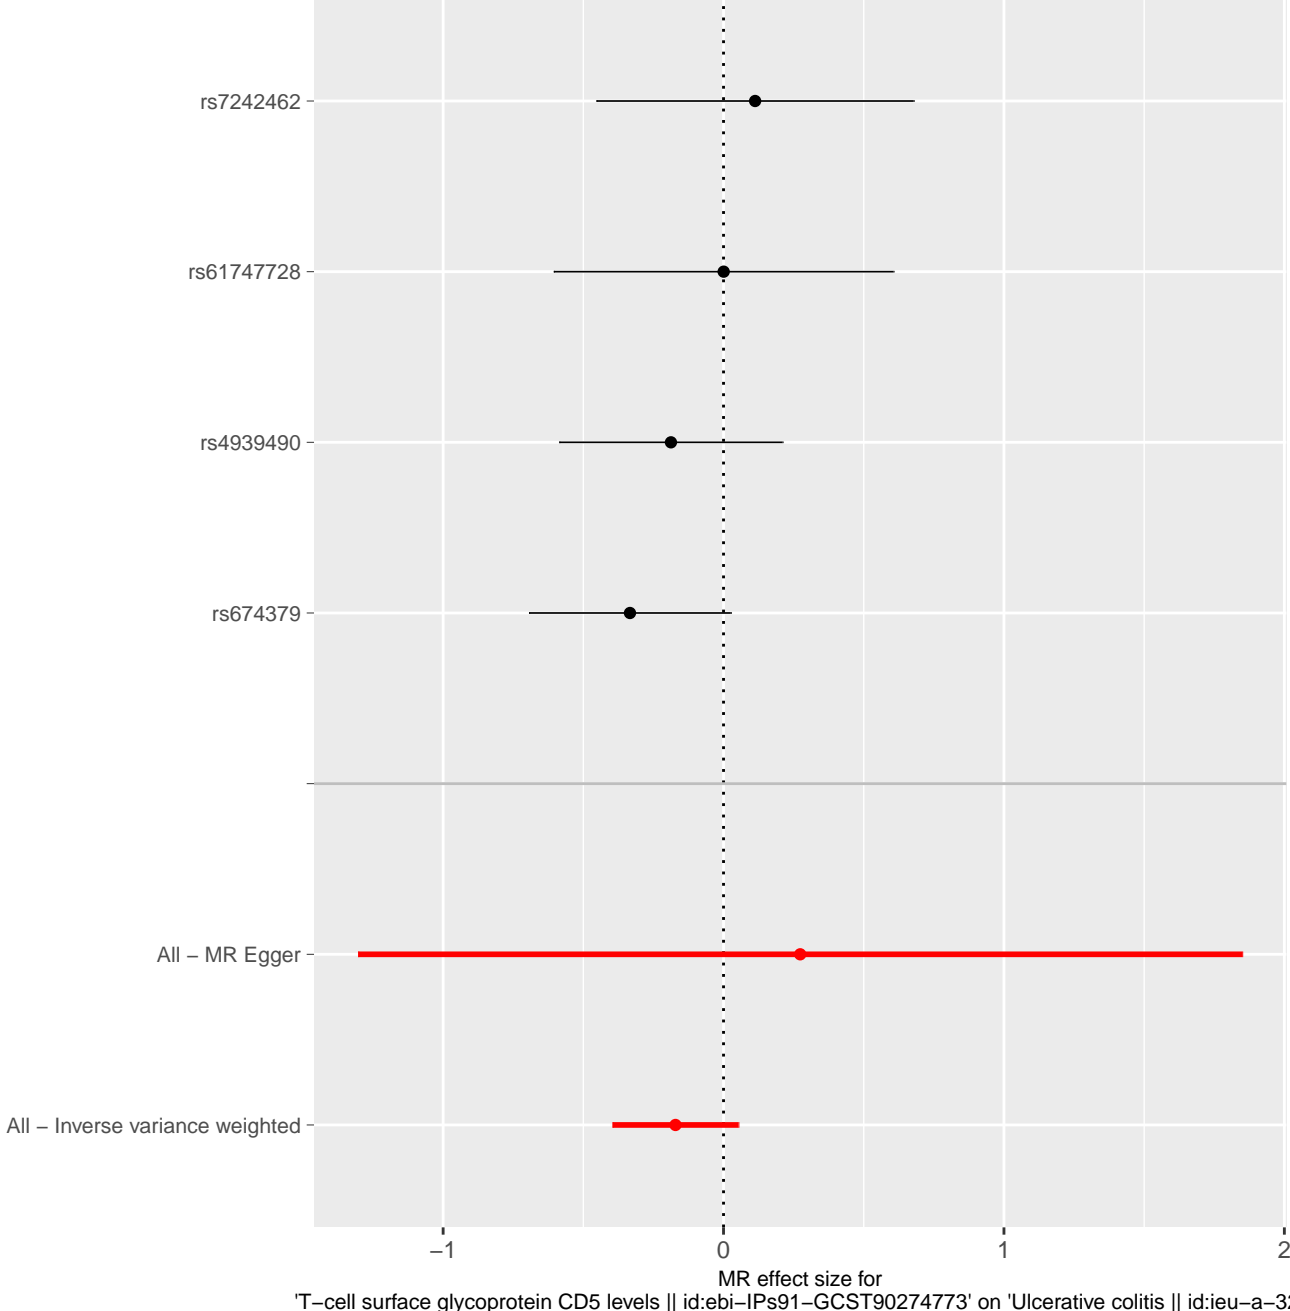

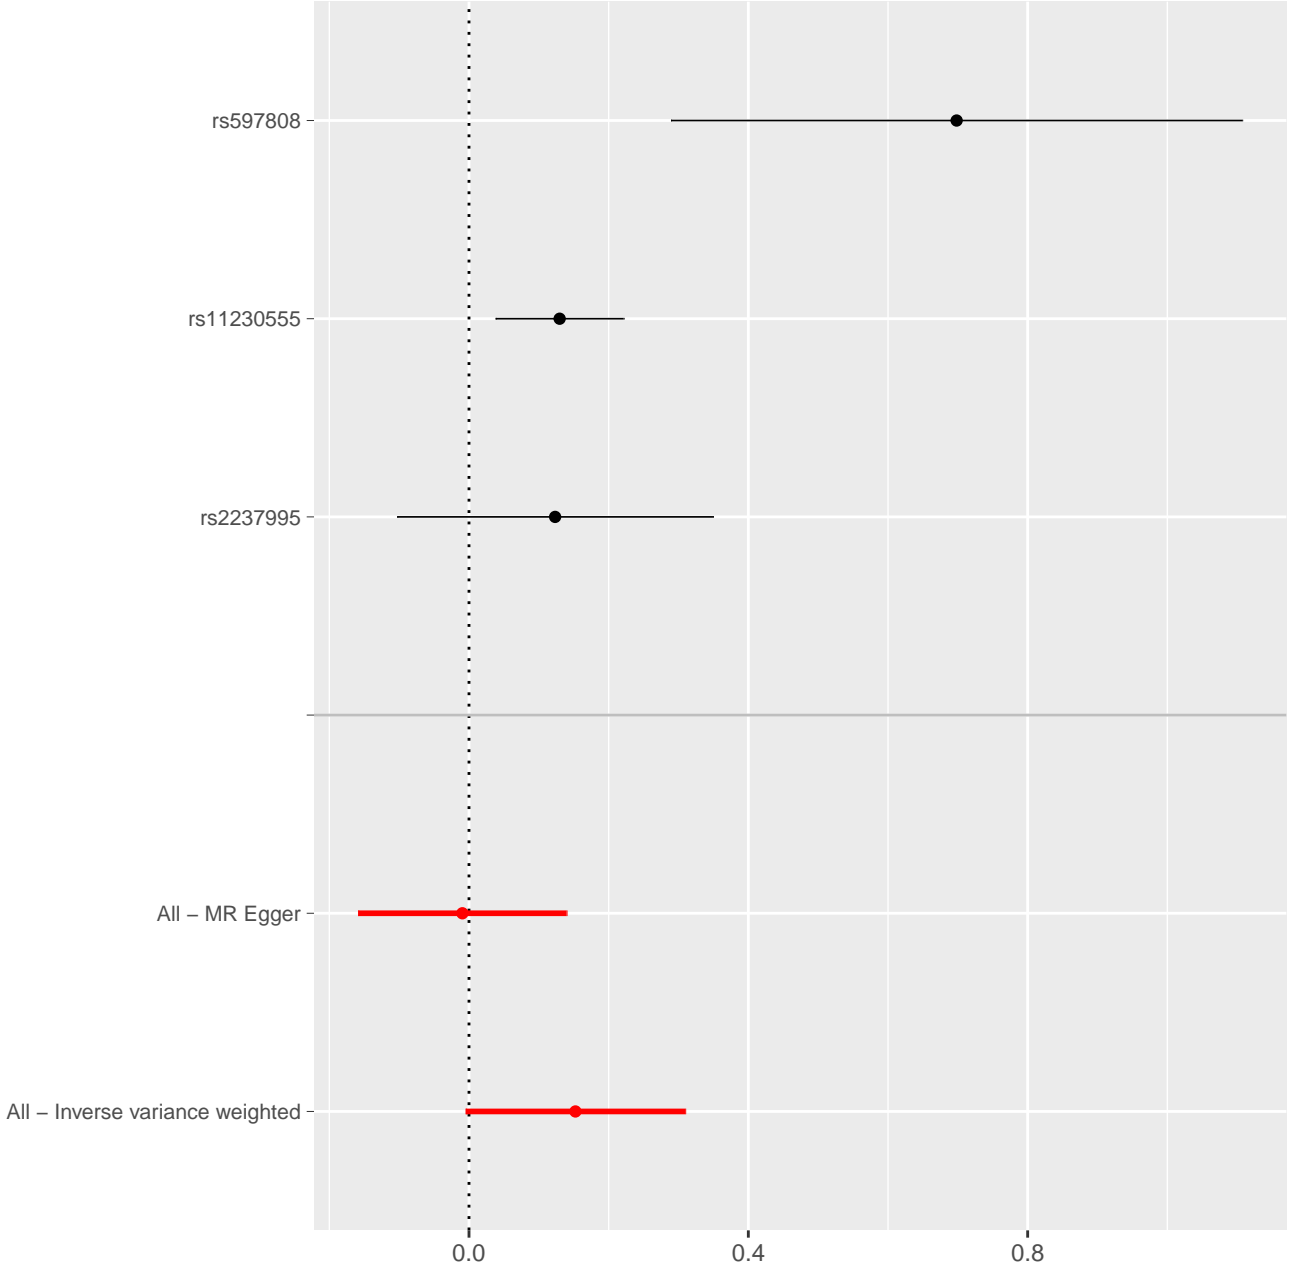

MR effect size for  
'T-cell surface glycoprotein CD6 isoform levels || id:ebi-IPs91-GCST90274774' on 'Crohn's disease || id:ieu-a

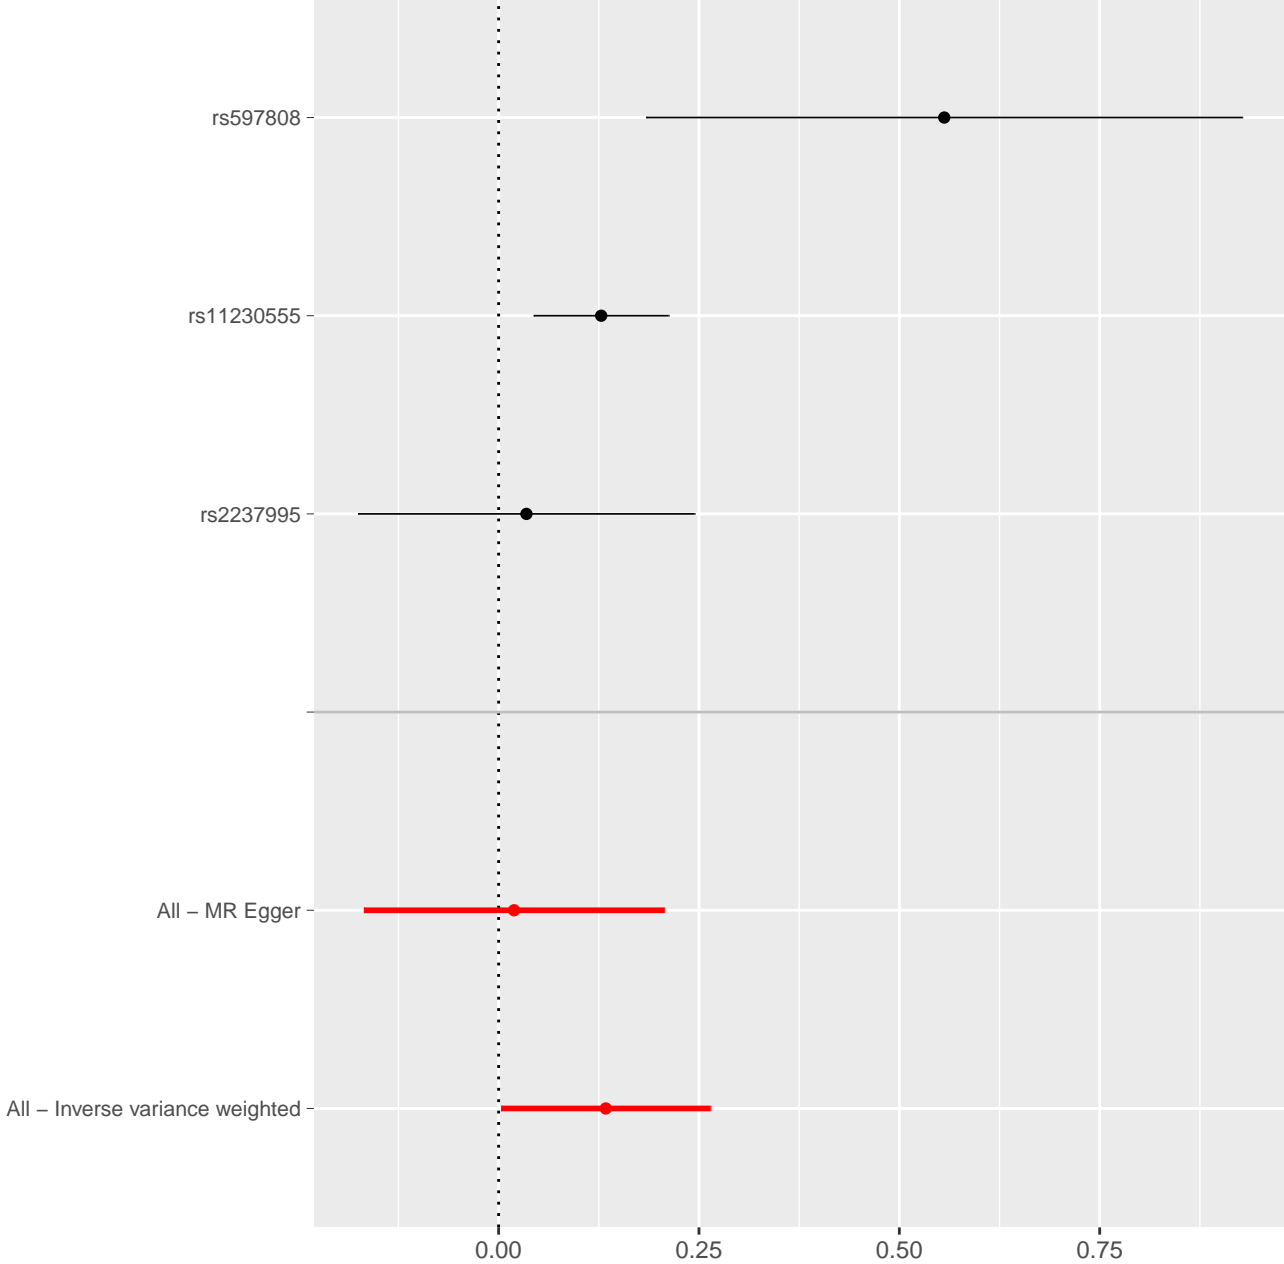

MR effect size for  
'T-cell surface glycoprotein CD6 isoform levels || id:ebi-IPs91-GCST90274774' on 'Ulcerative colitis || id:ieu-a

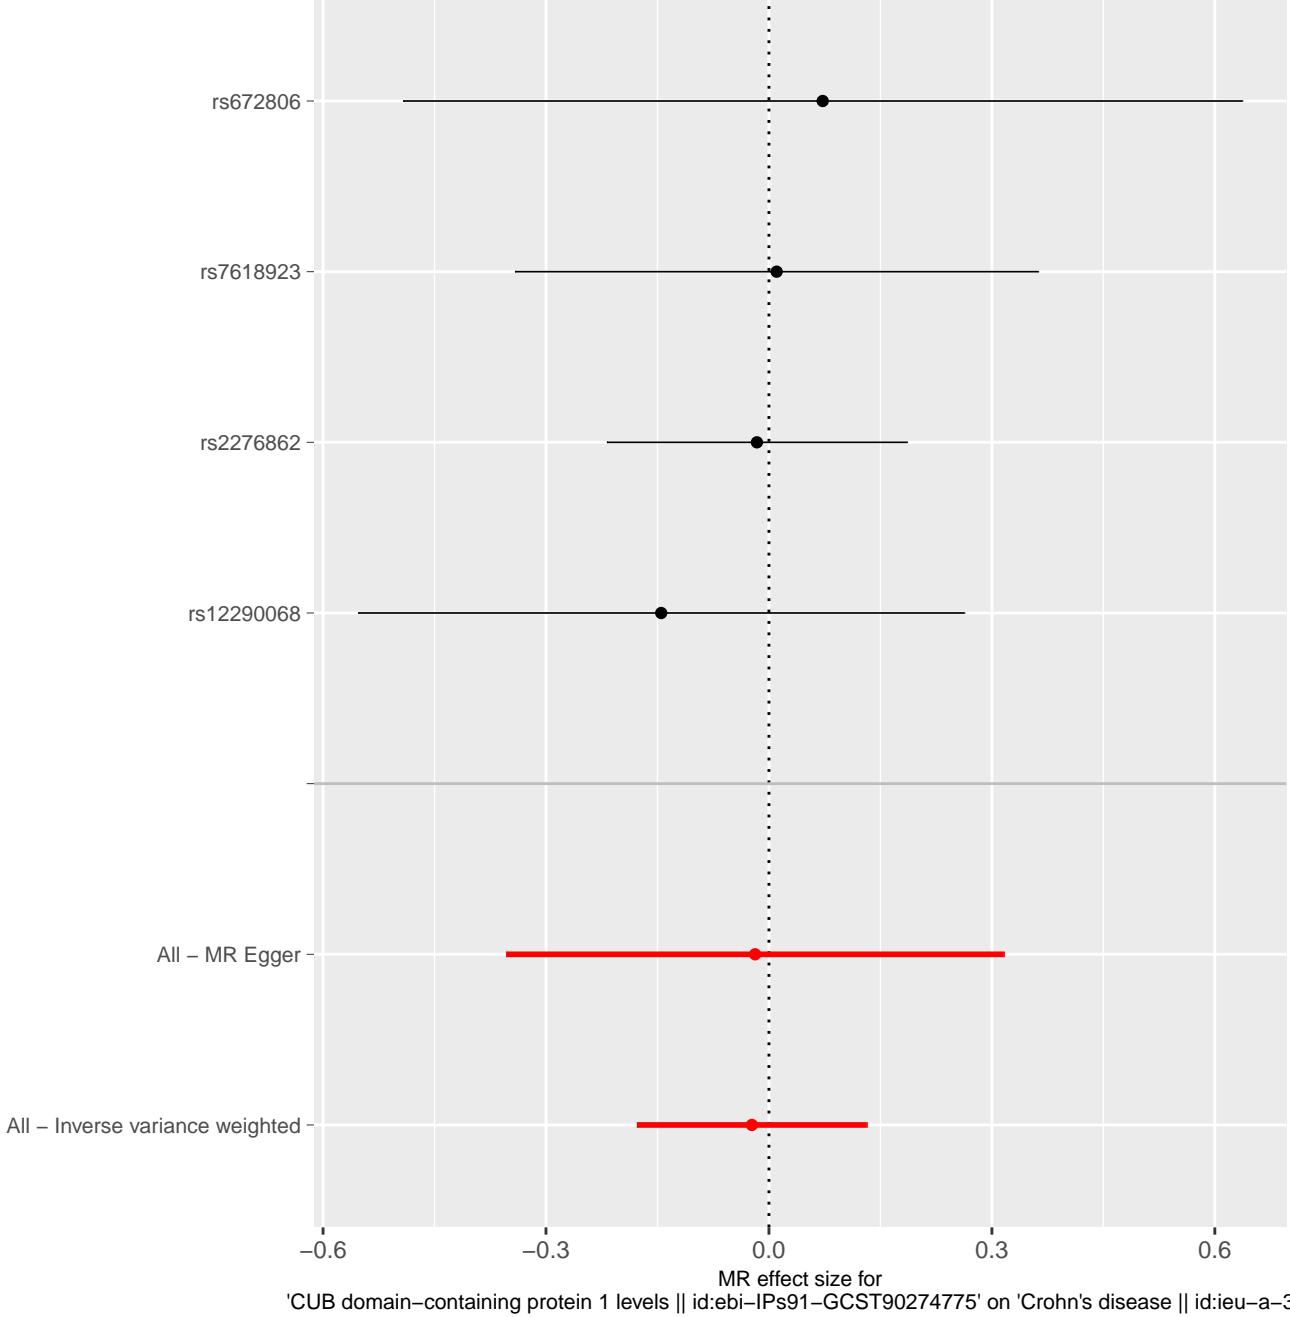

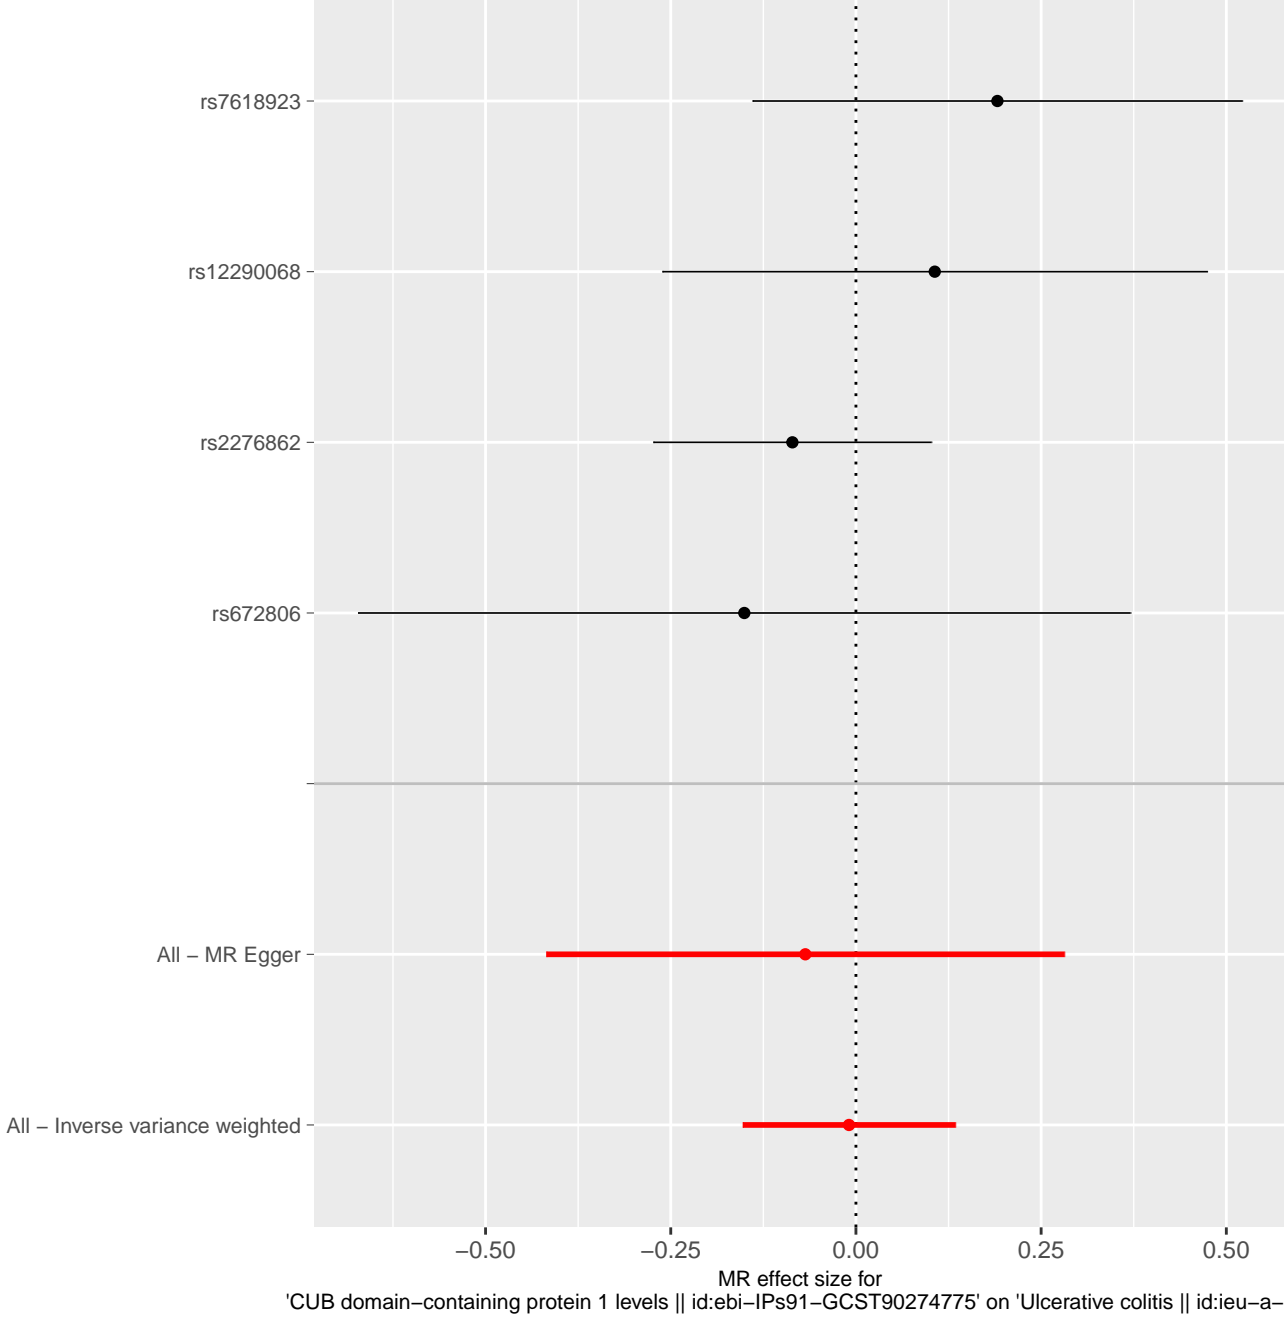

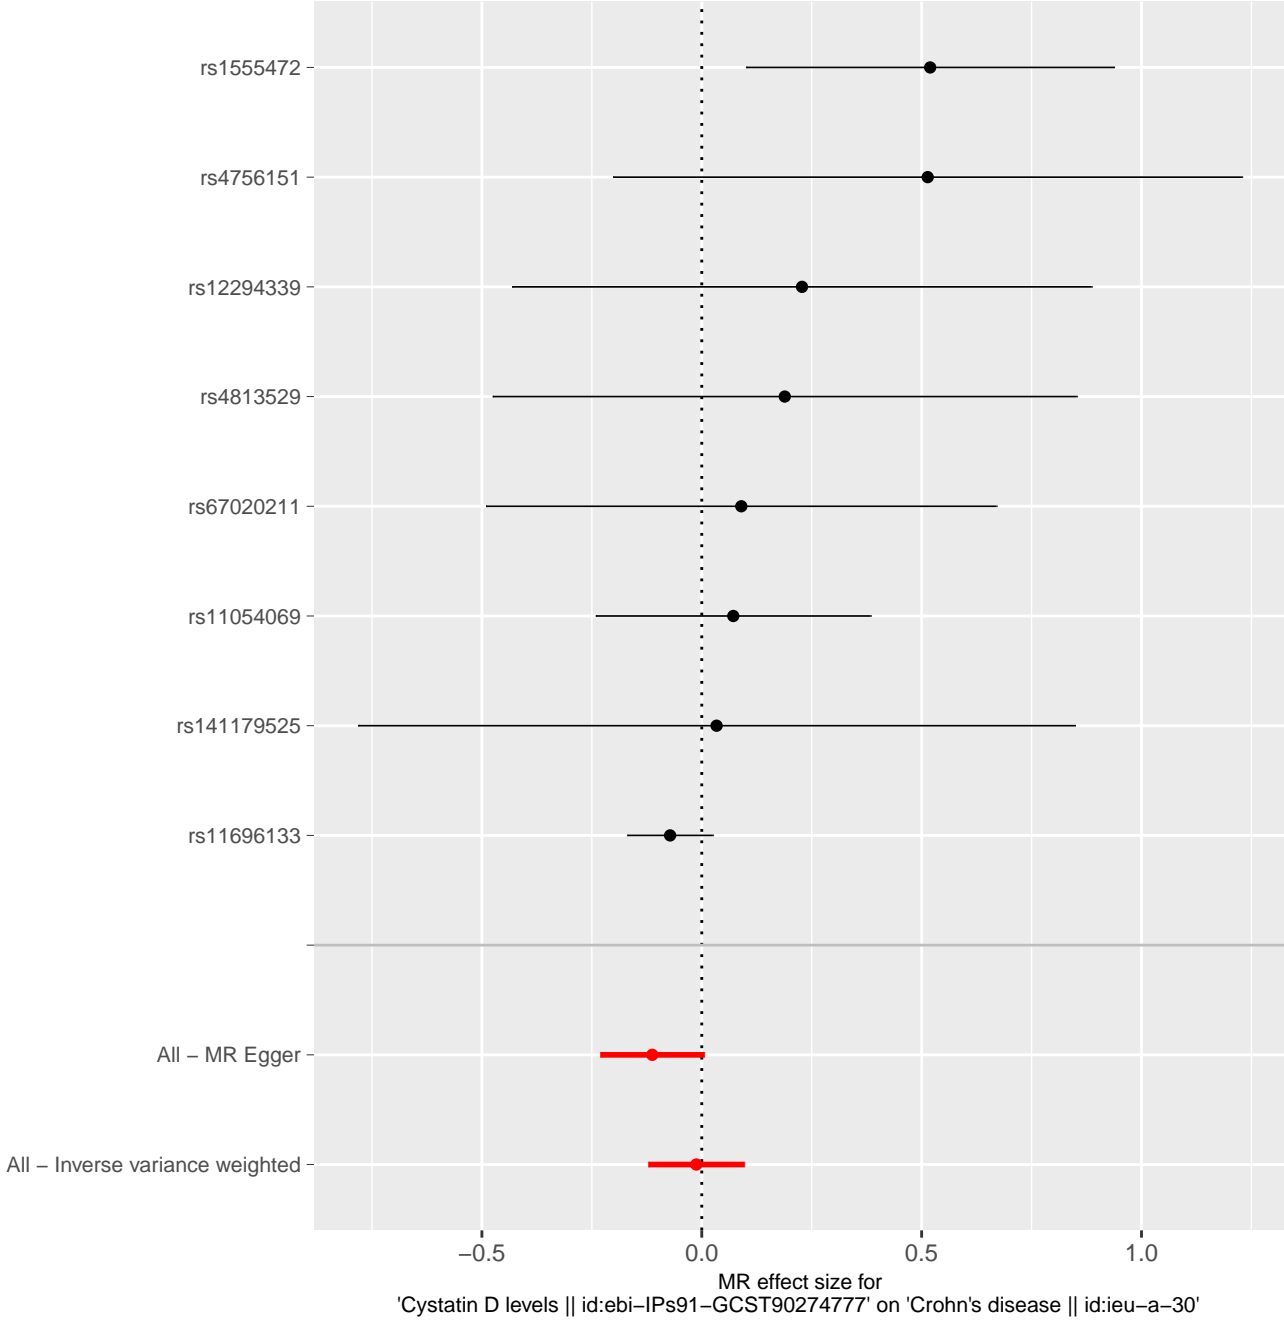

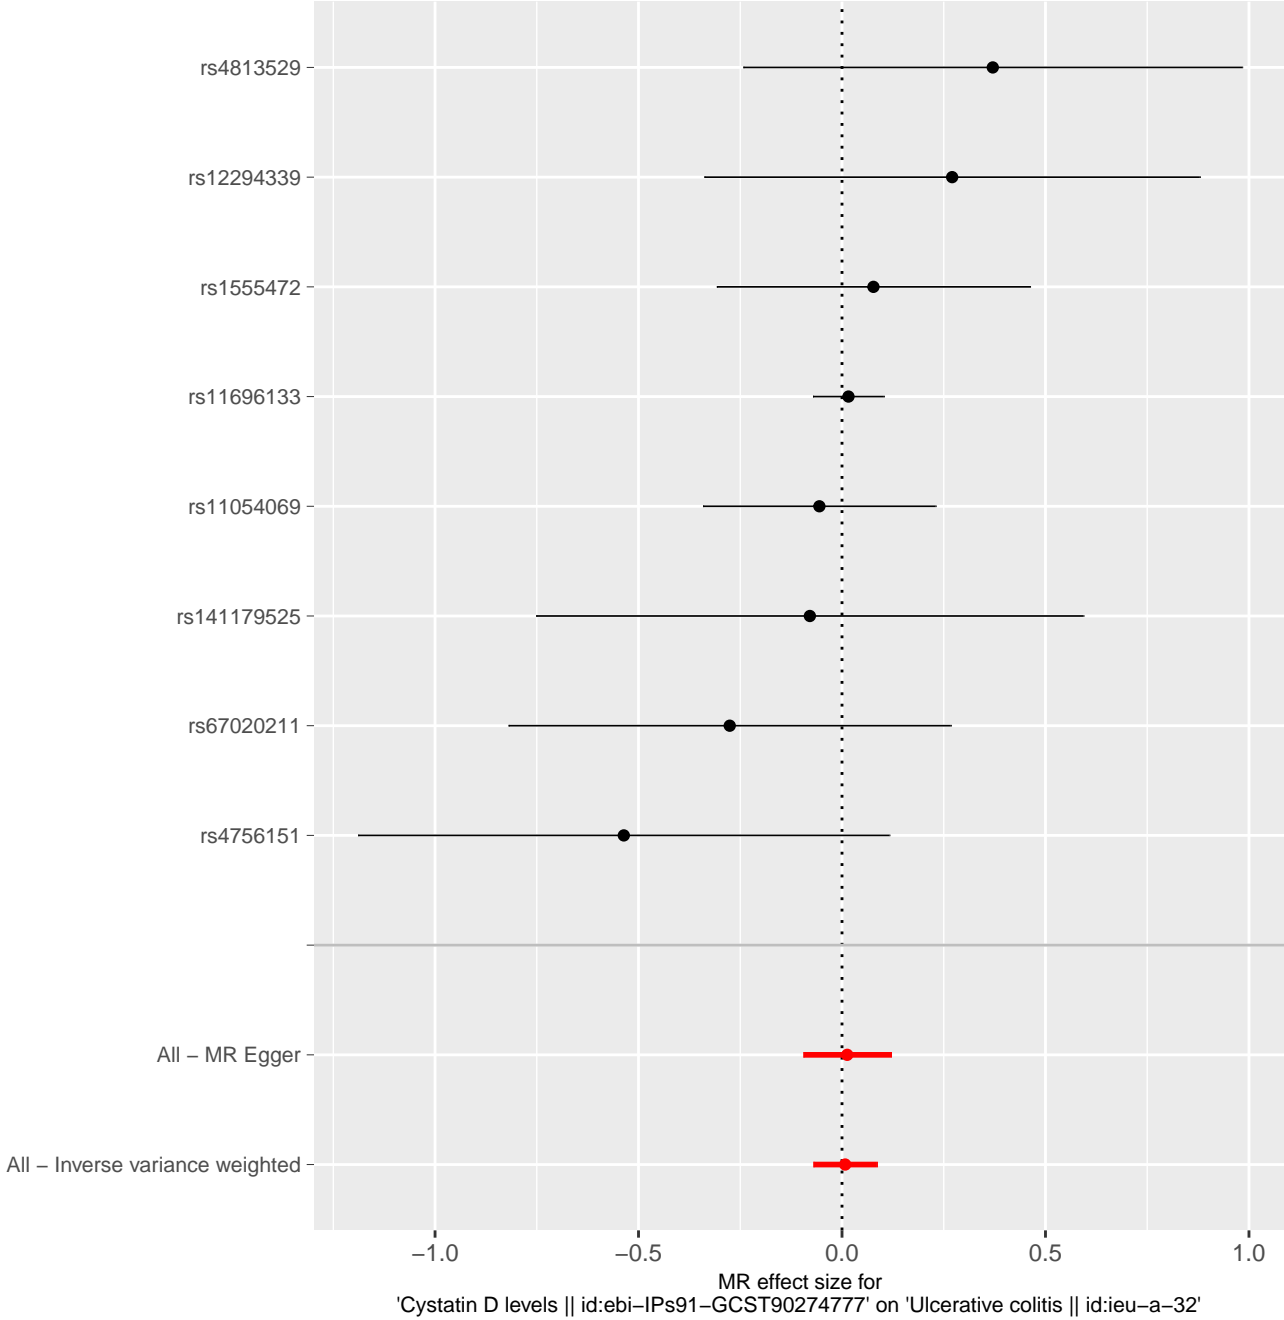

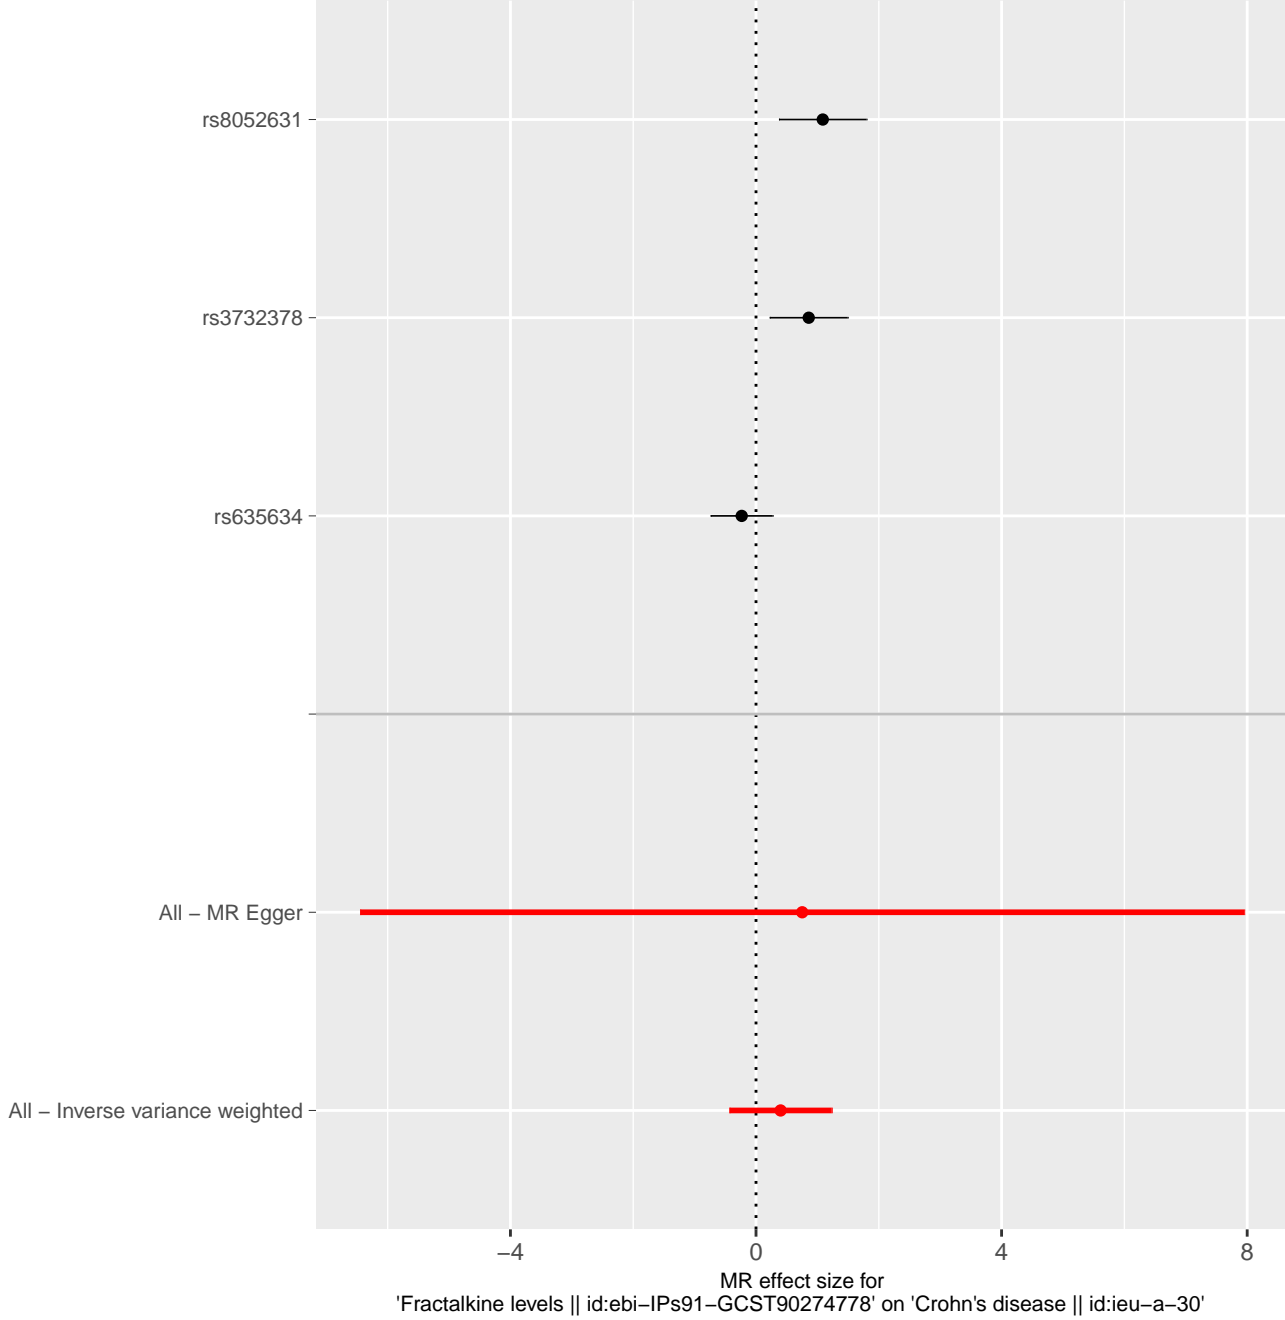



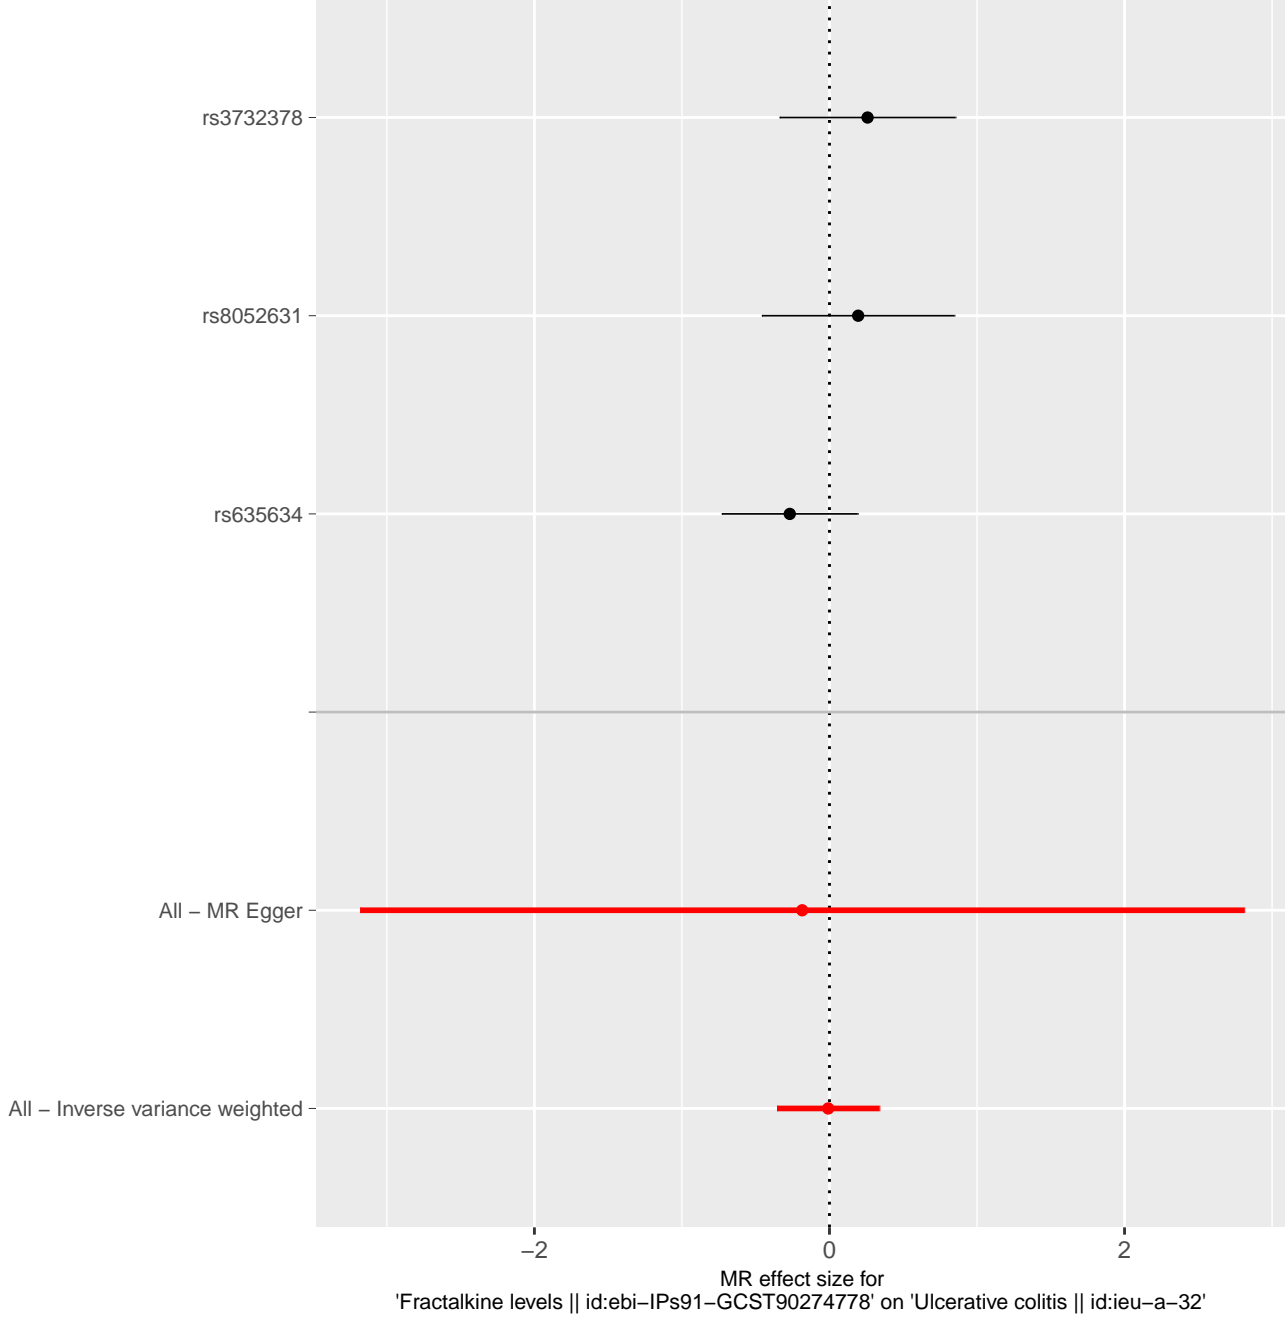

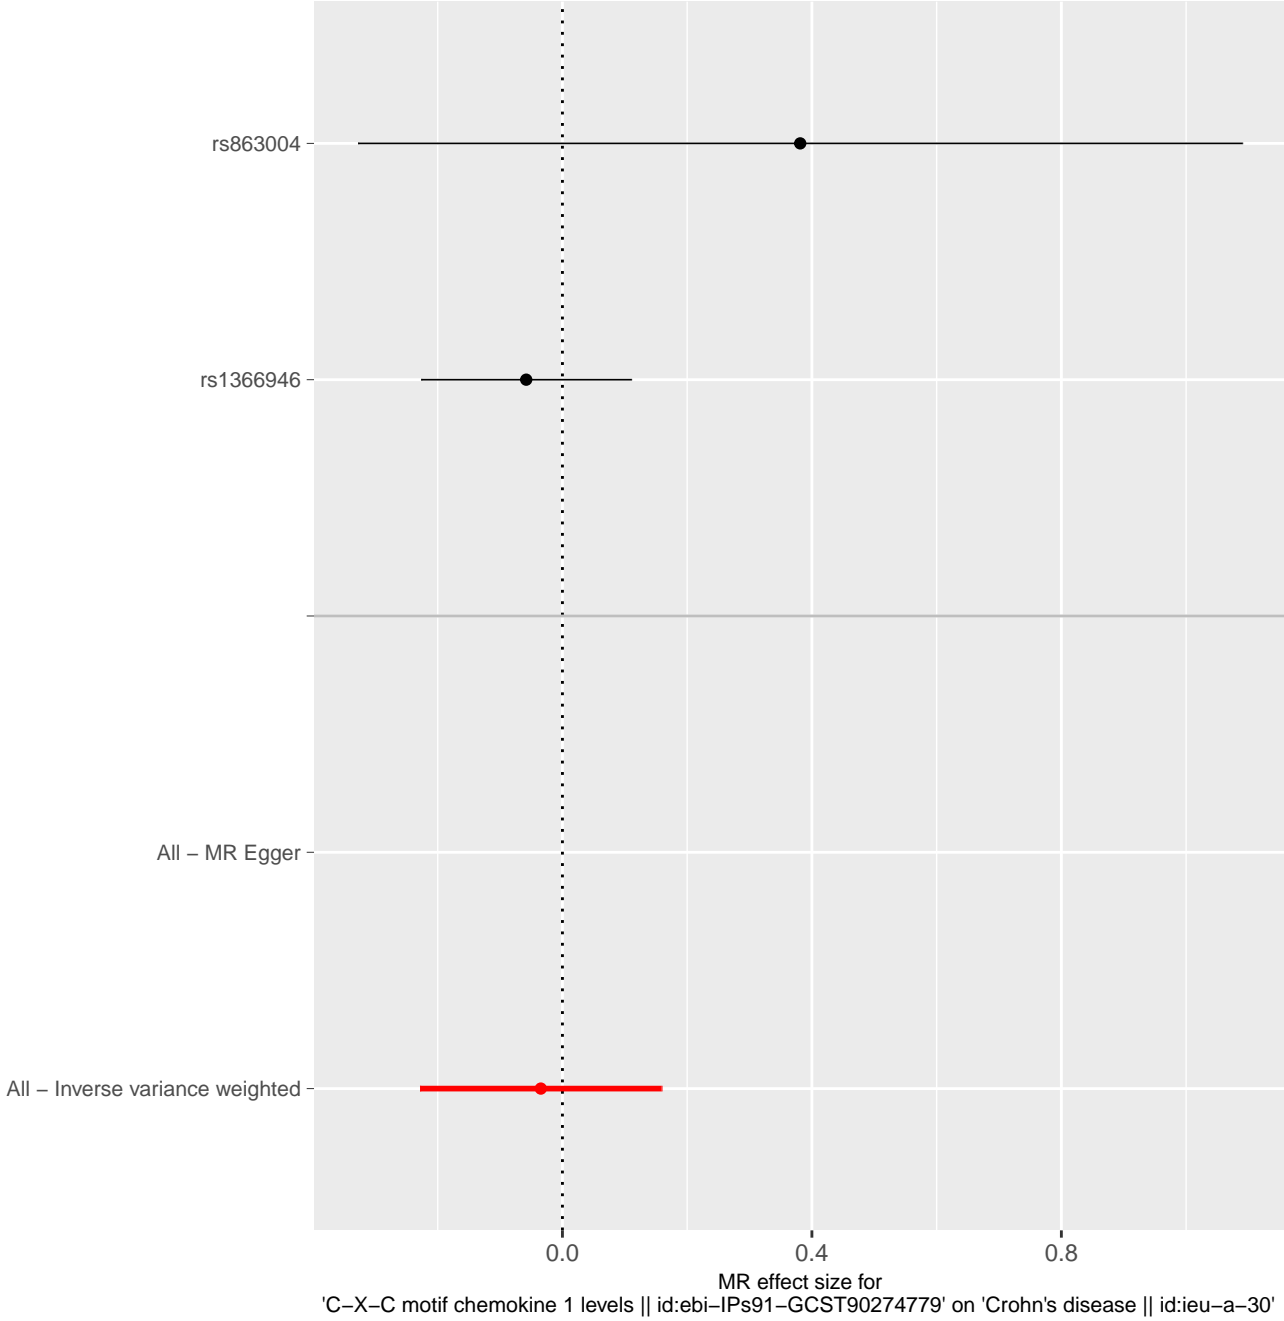

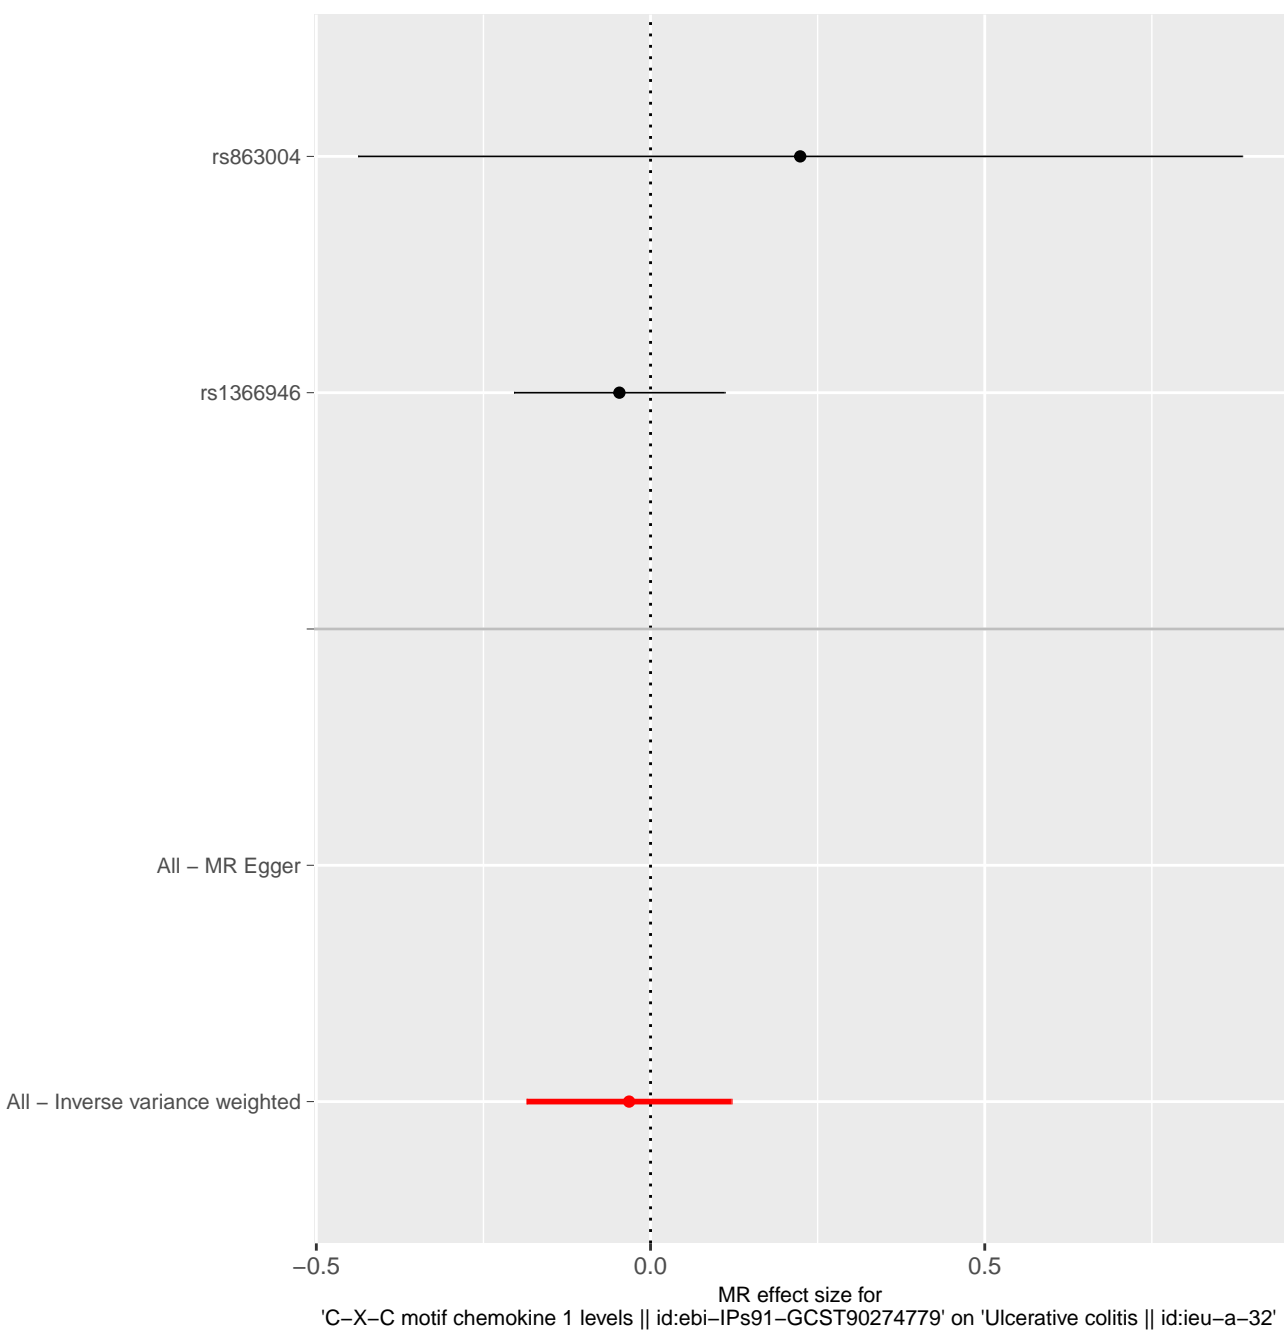

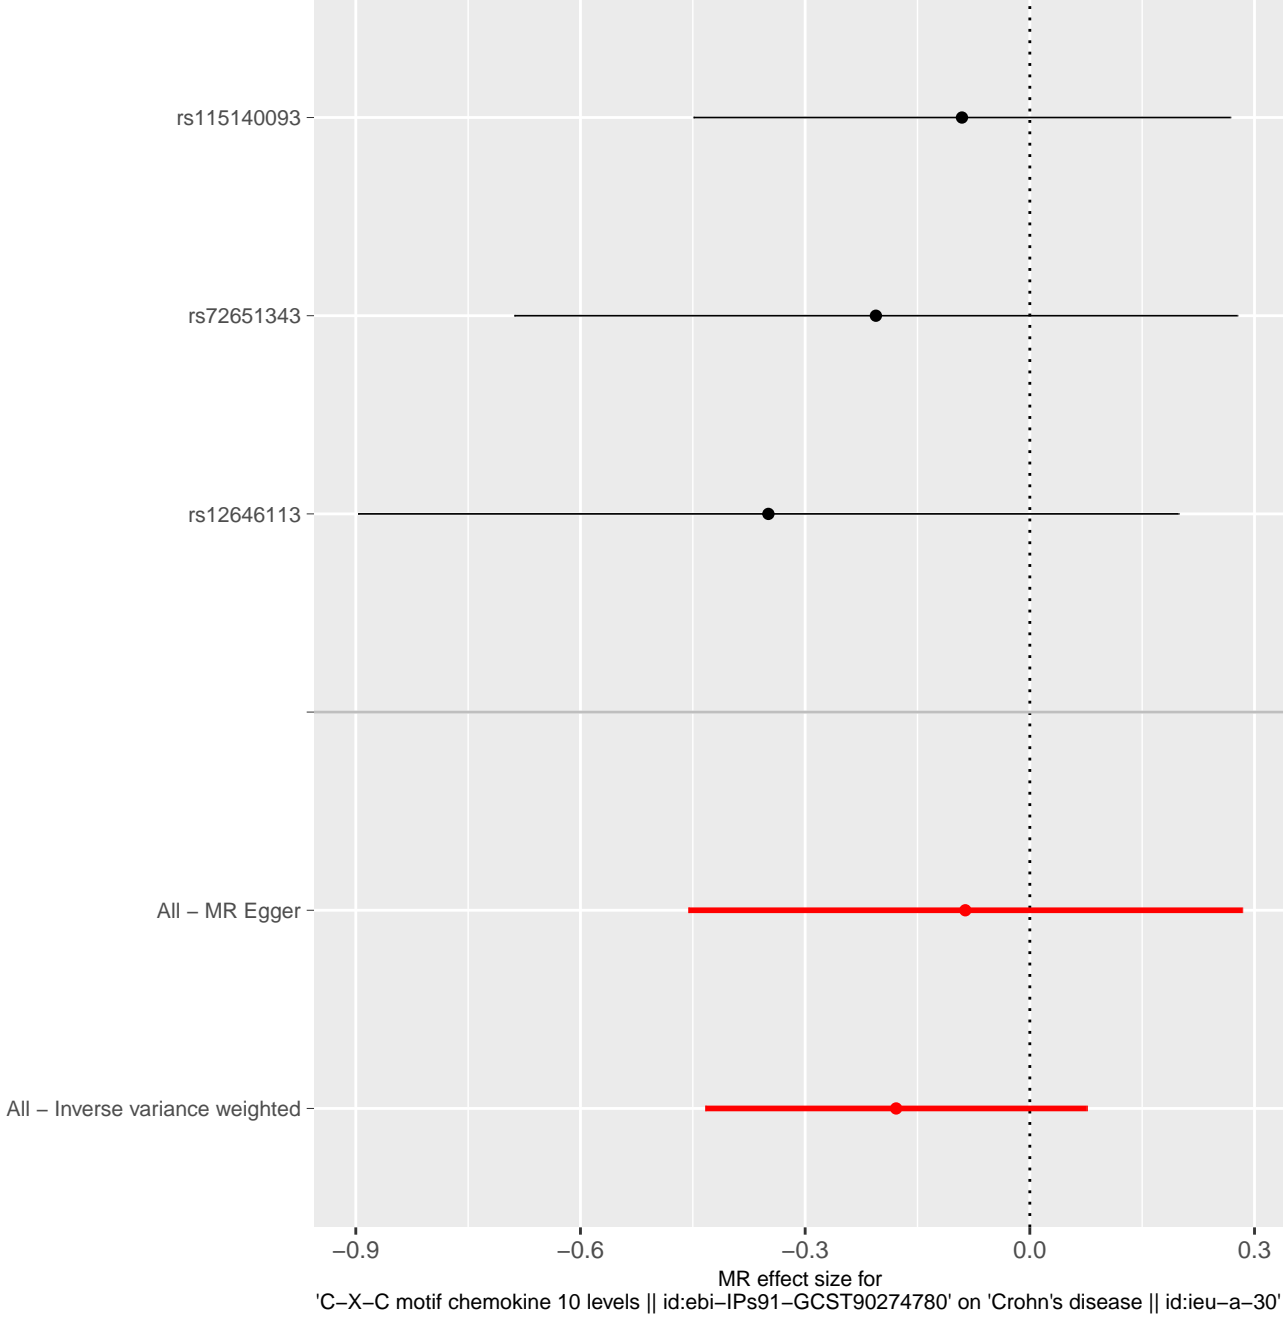

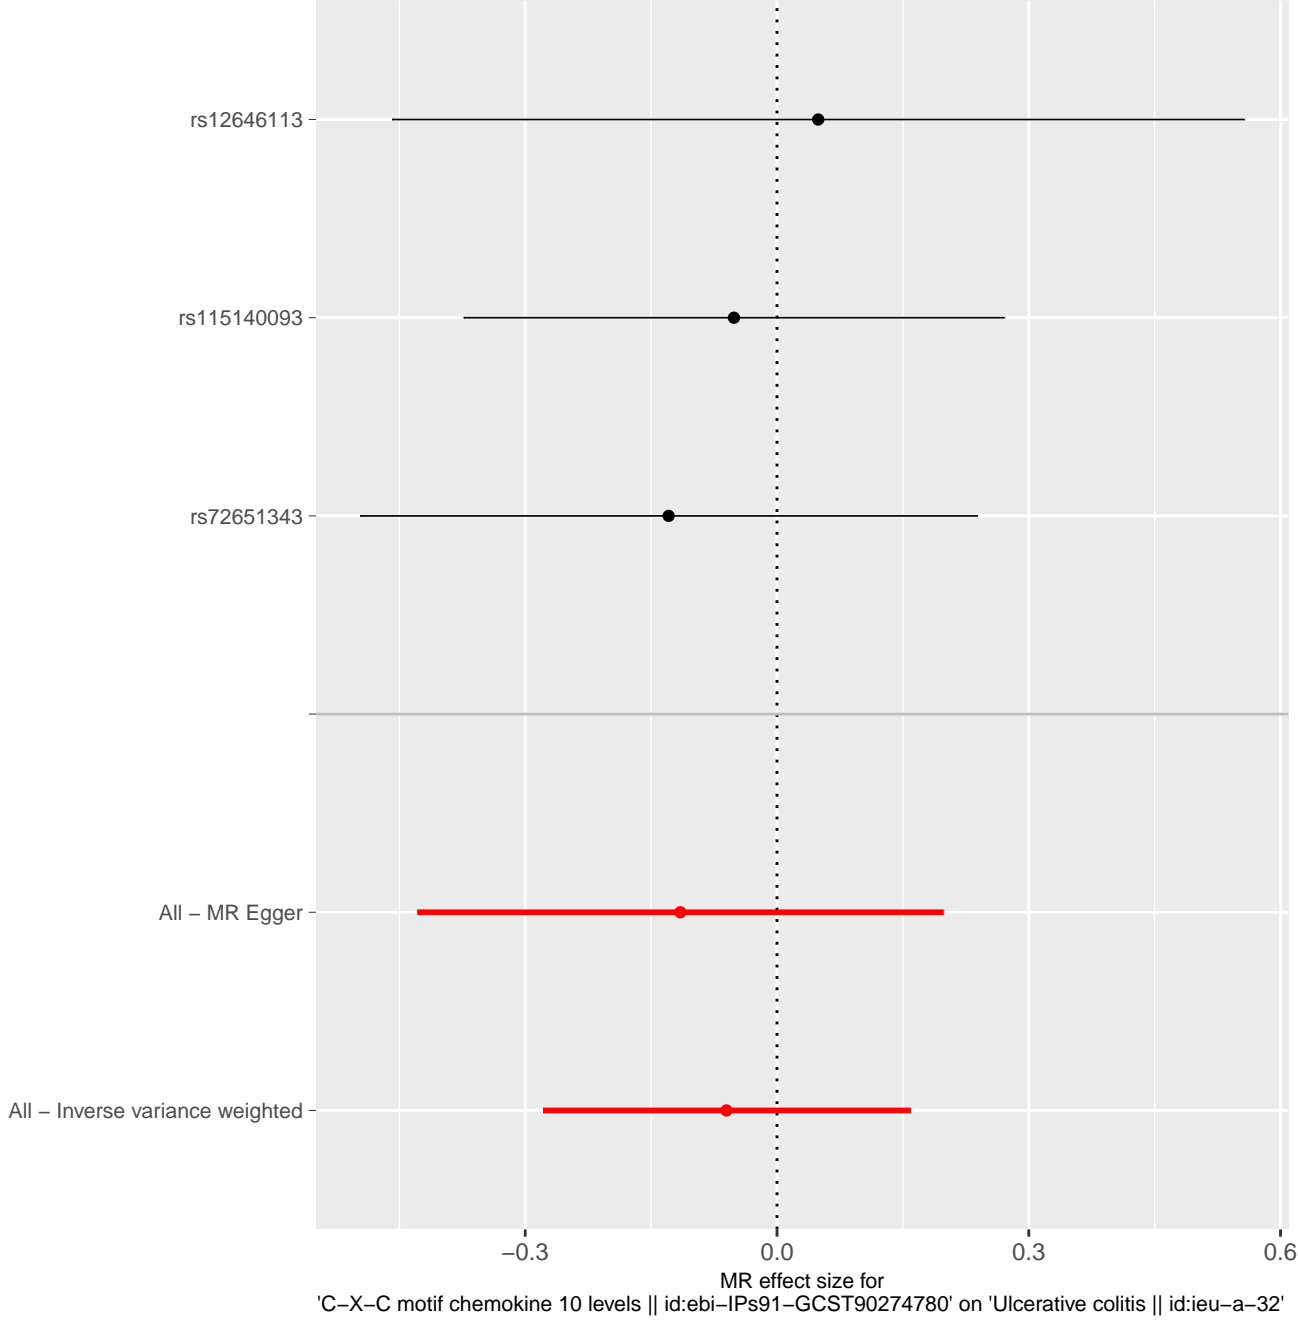

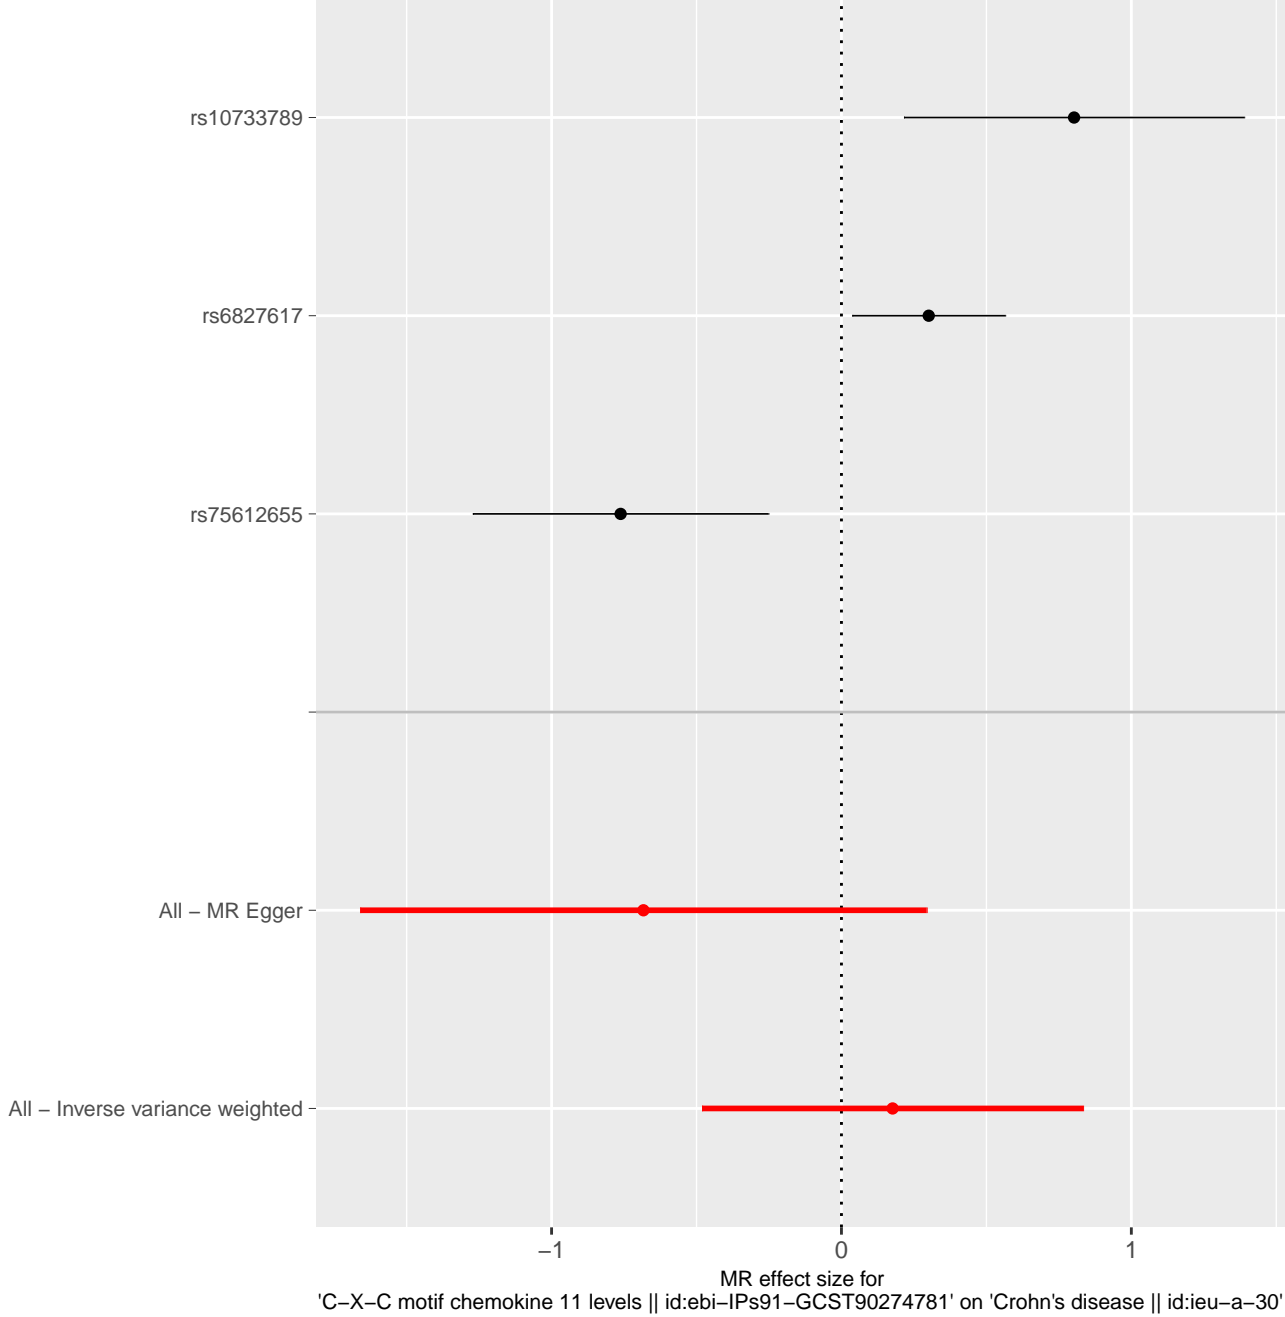

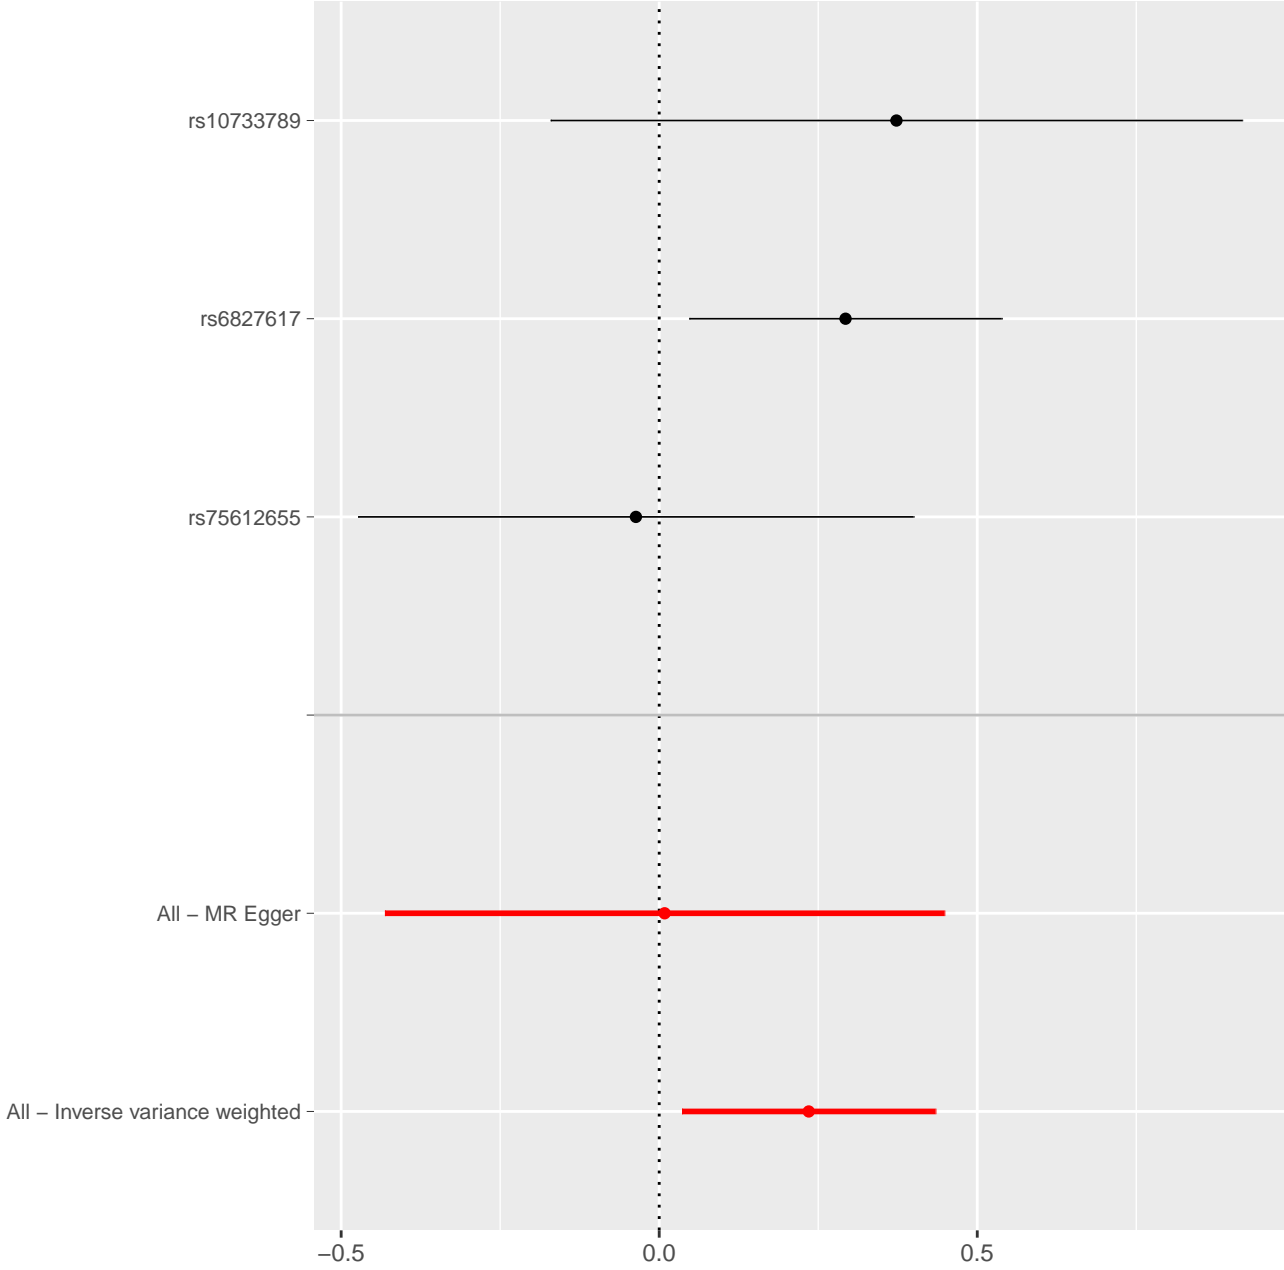

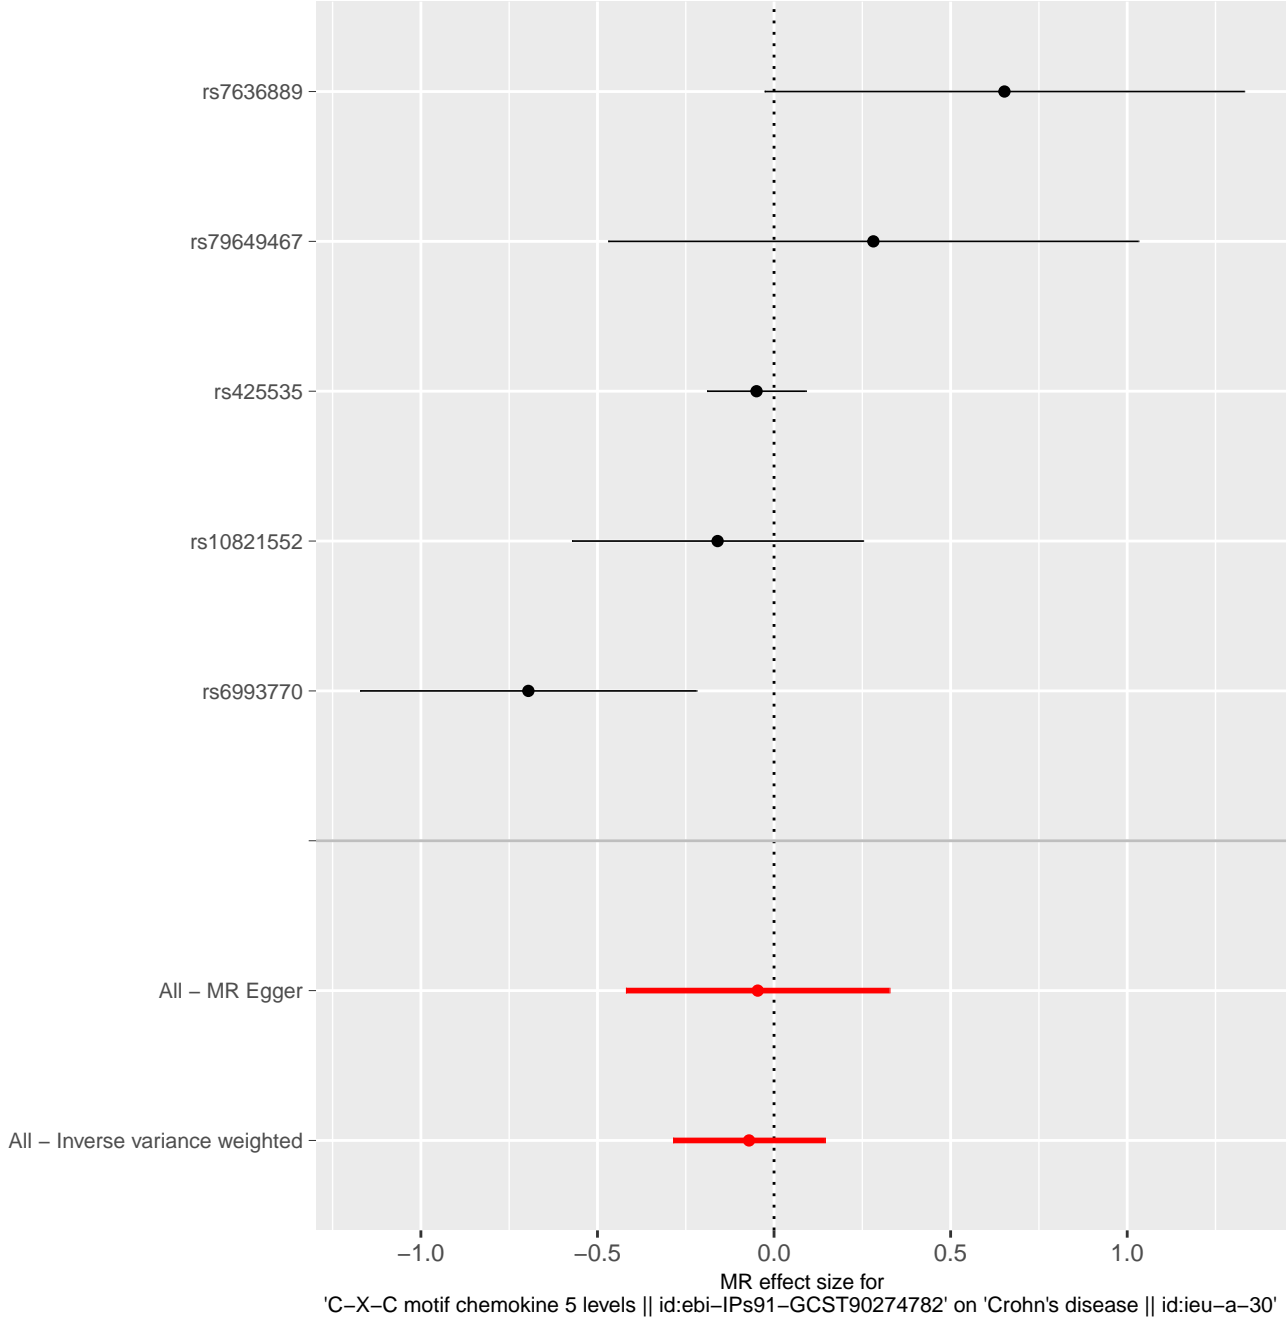



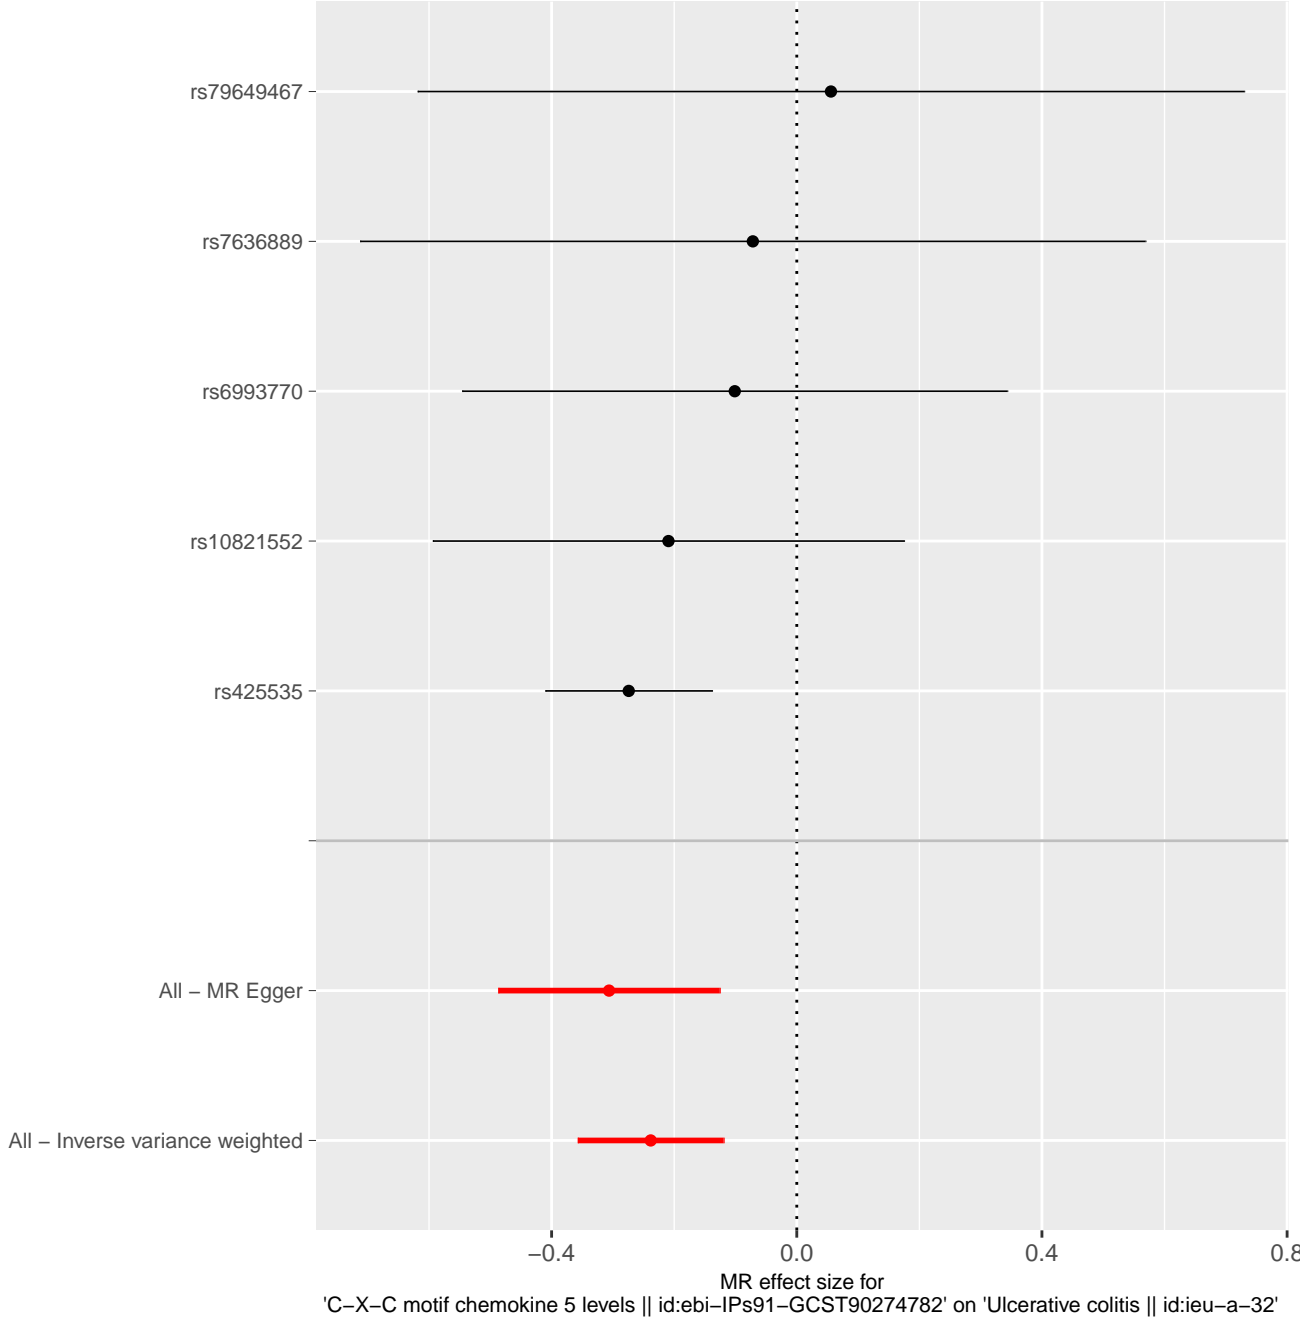

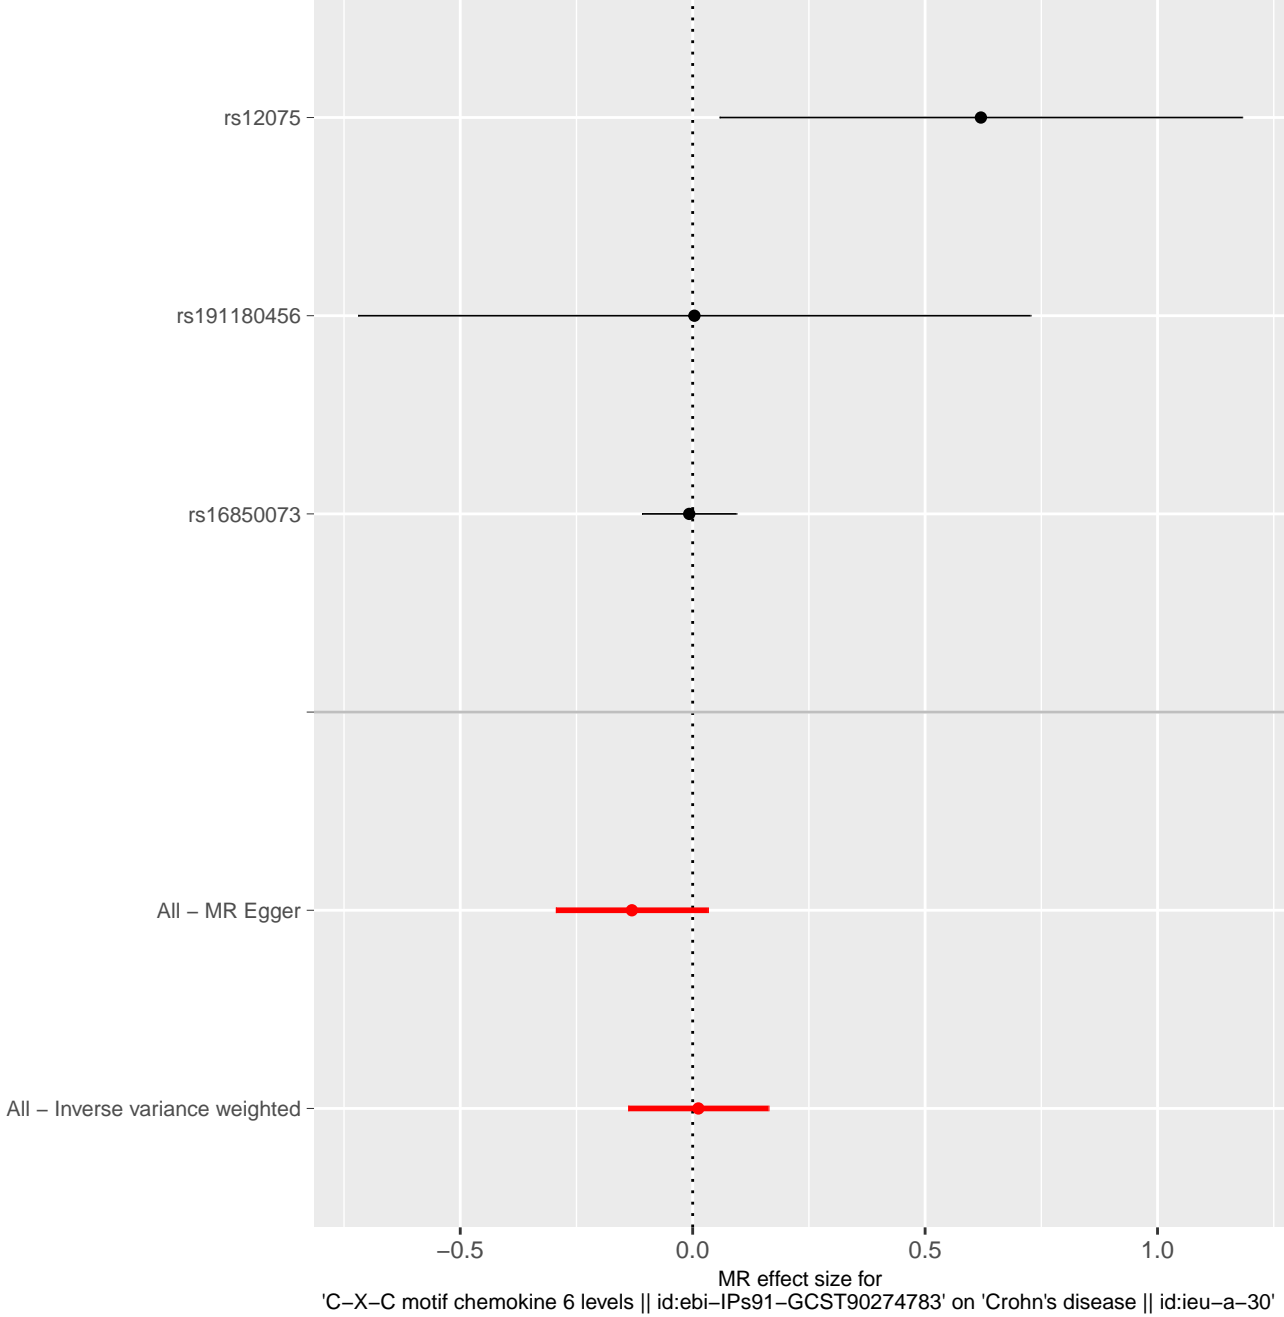

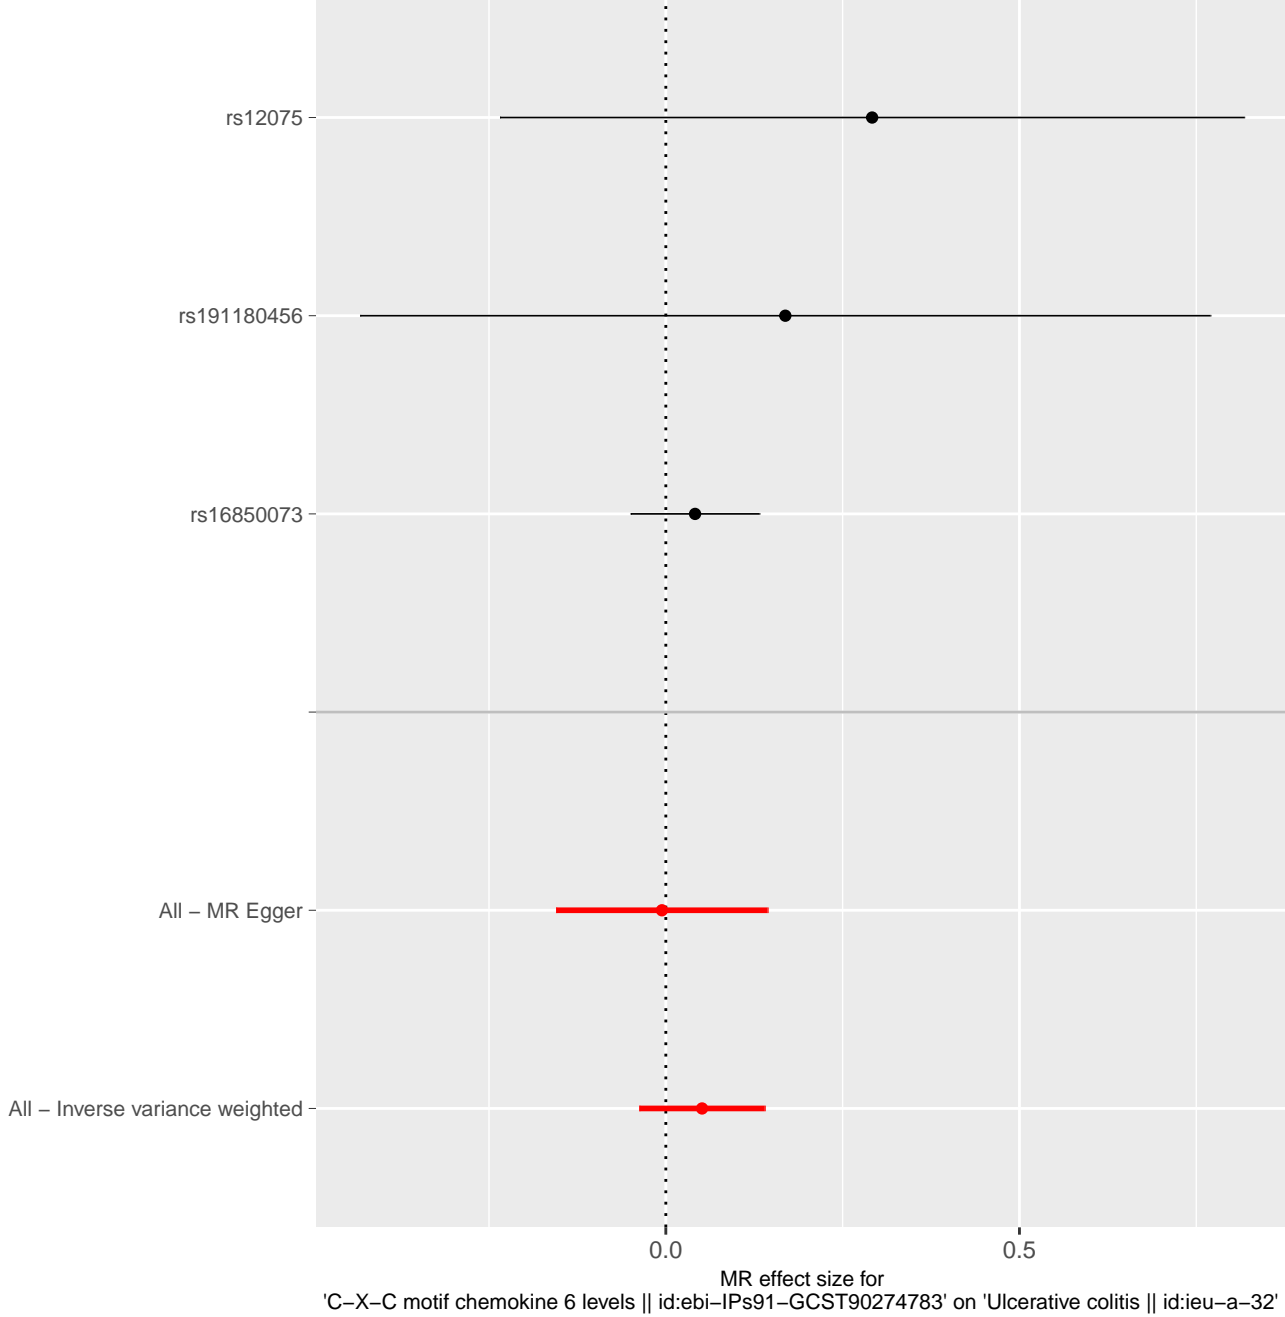

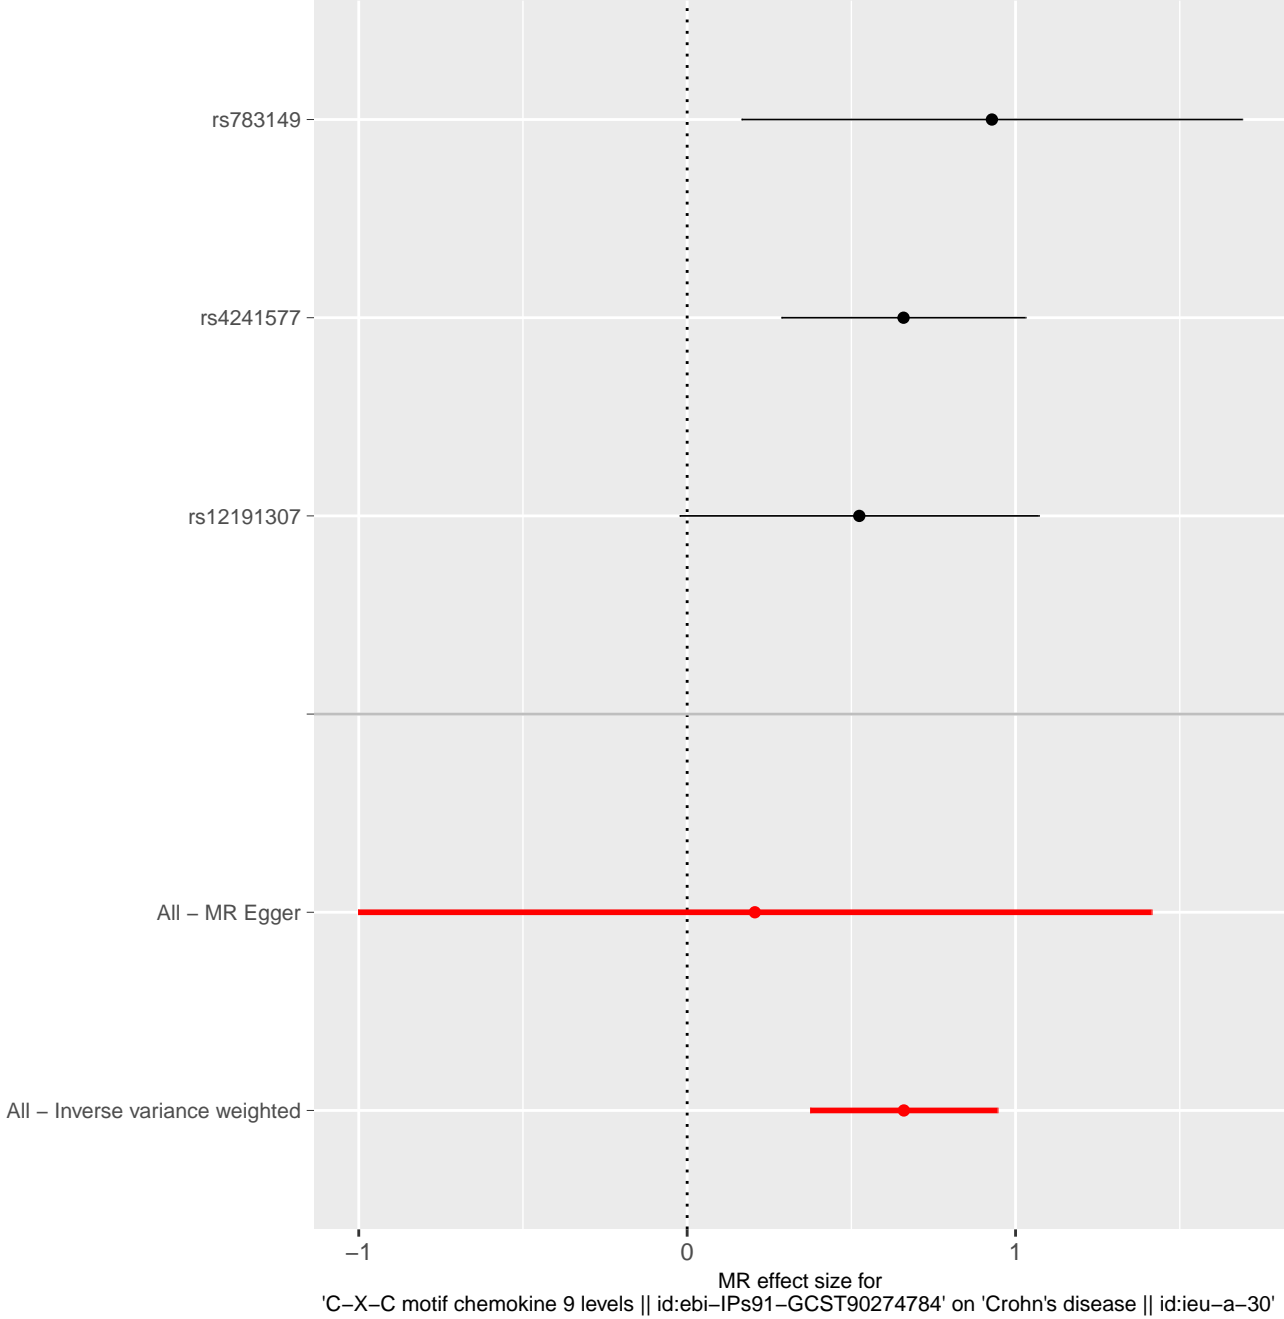

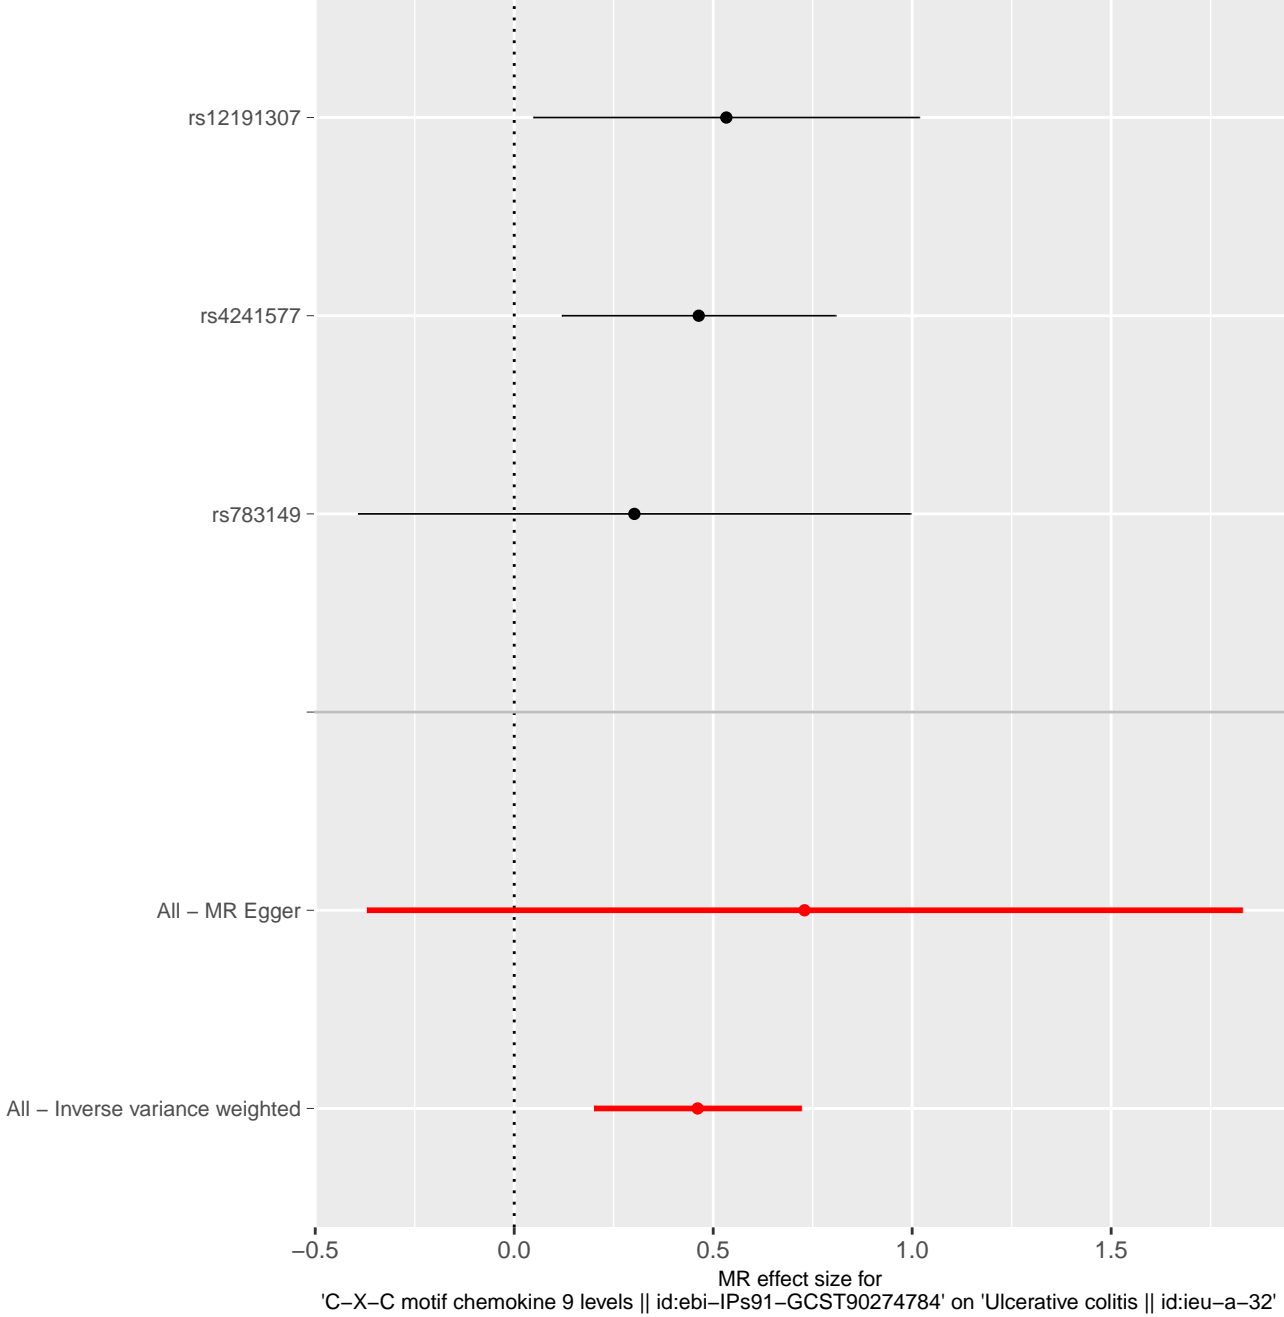

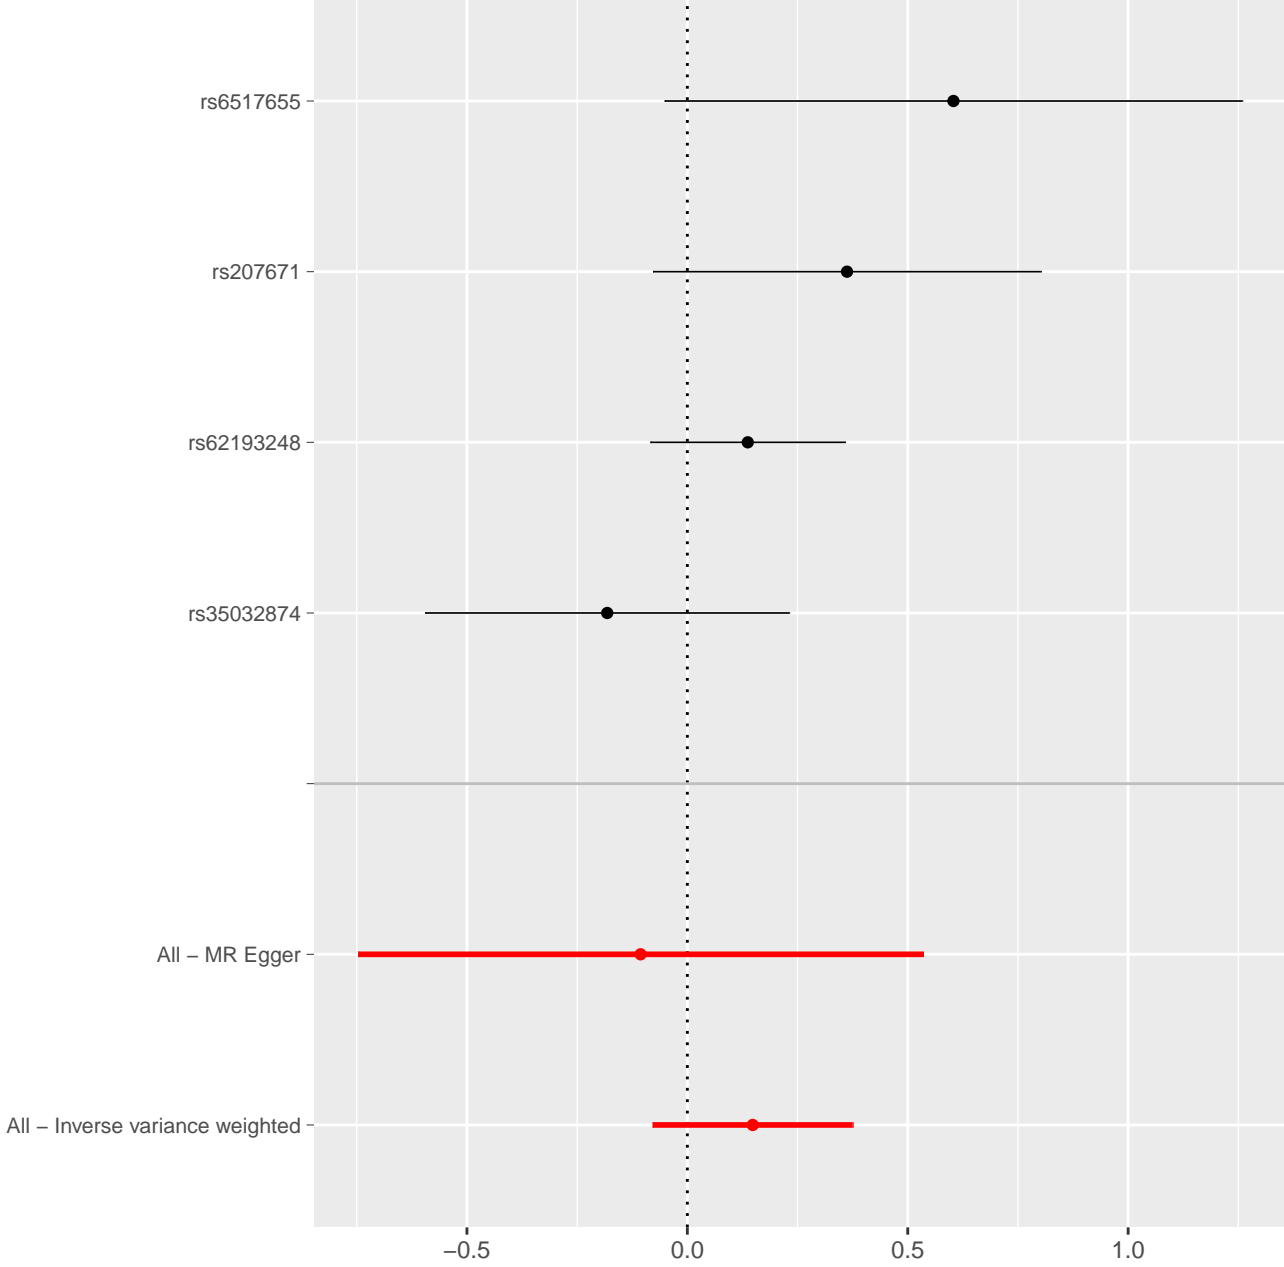

MR effect size for  
'Delta and Notch-like epidermal growth factor-related receptor levels || id:ebi-IPs91-GCST90274785' on 'Crohn's disease'

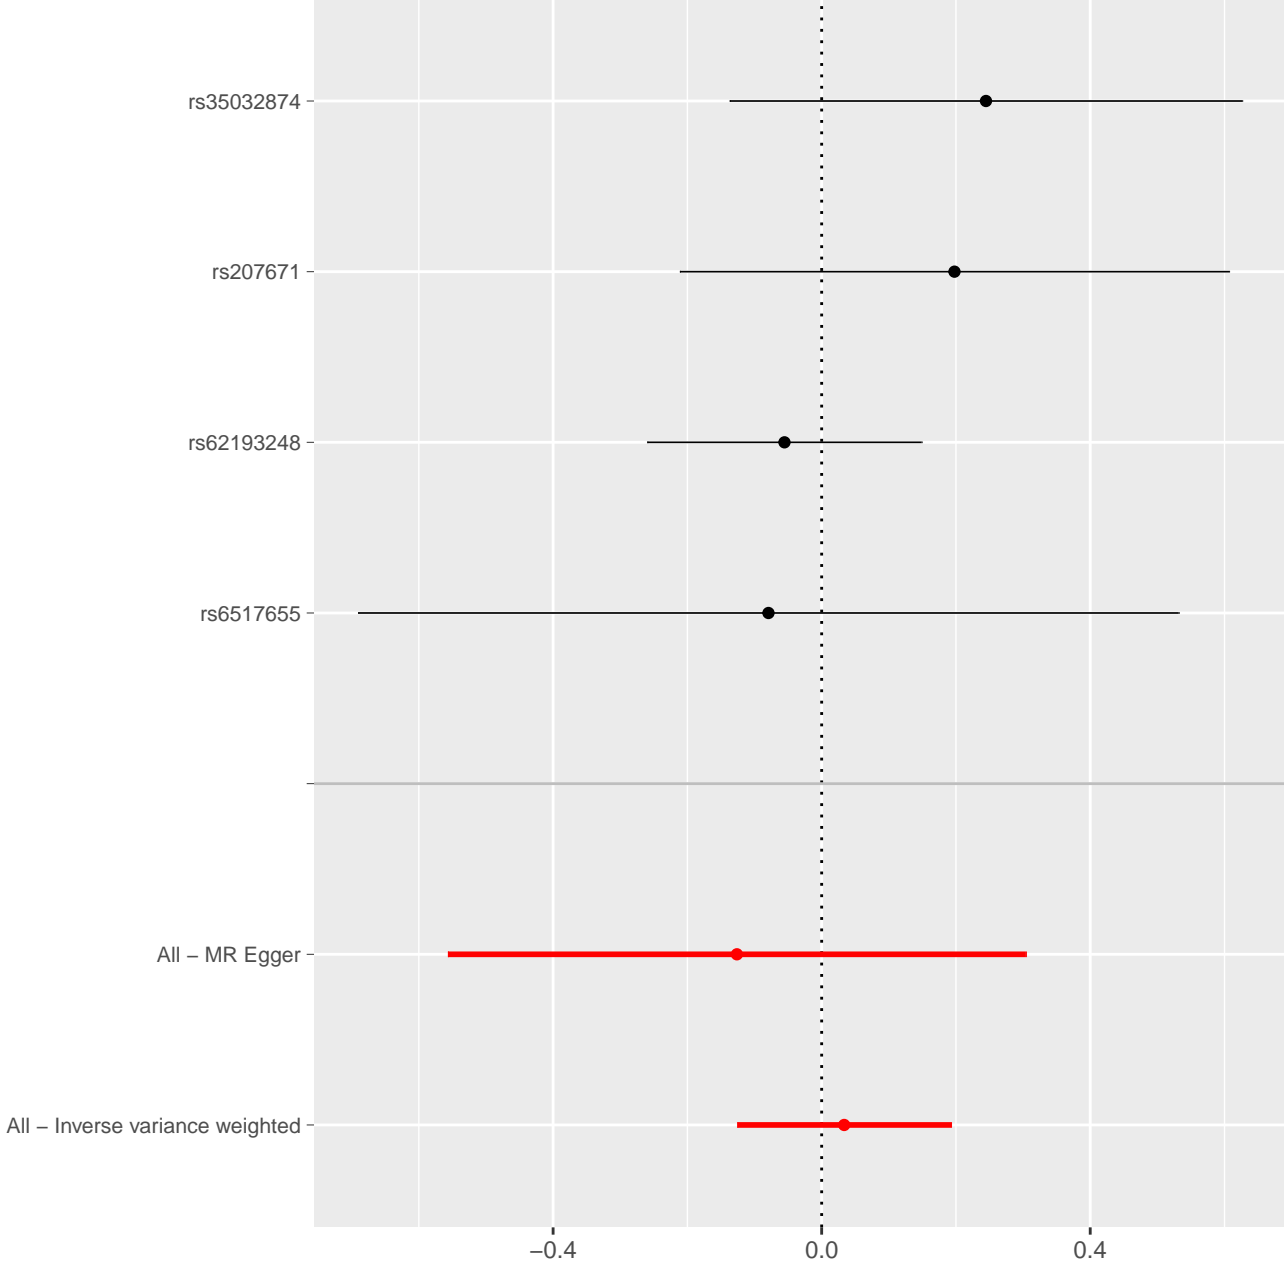

MR effect size for  
'Delta and Notch-like epidermal growth factor-related receptor levels || id:ebi-IPs91-GCST90274785' on 'Ulcerative colitis'

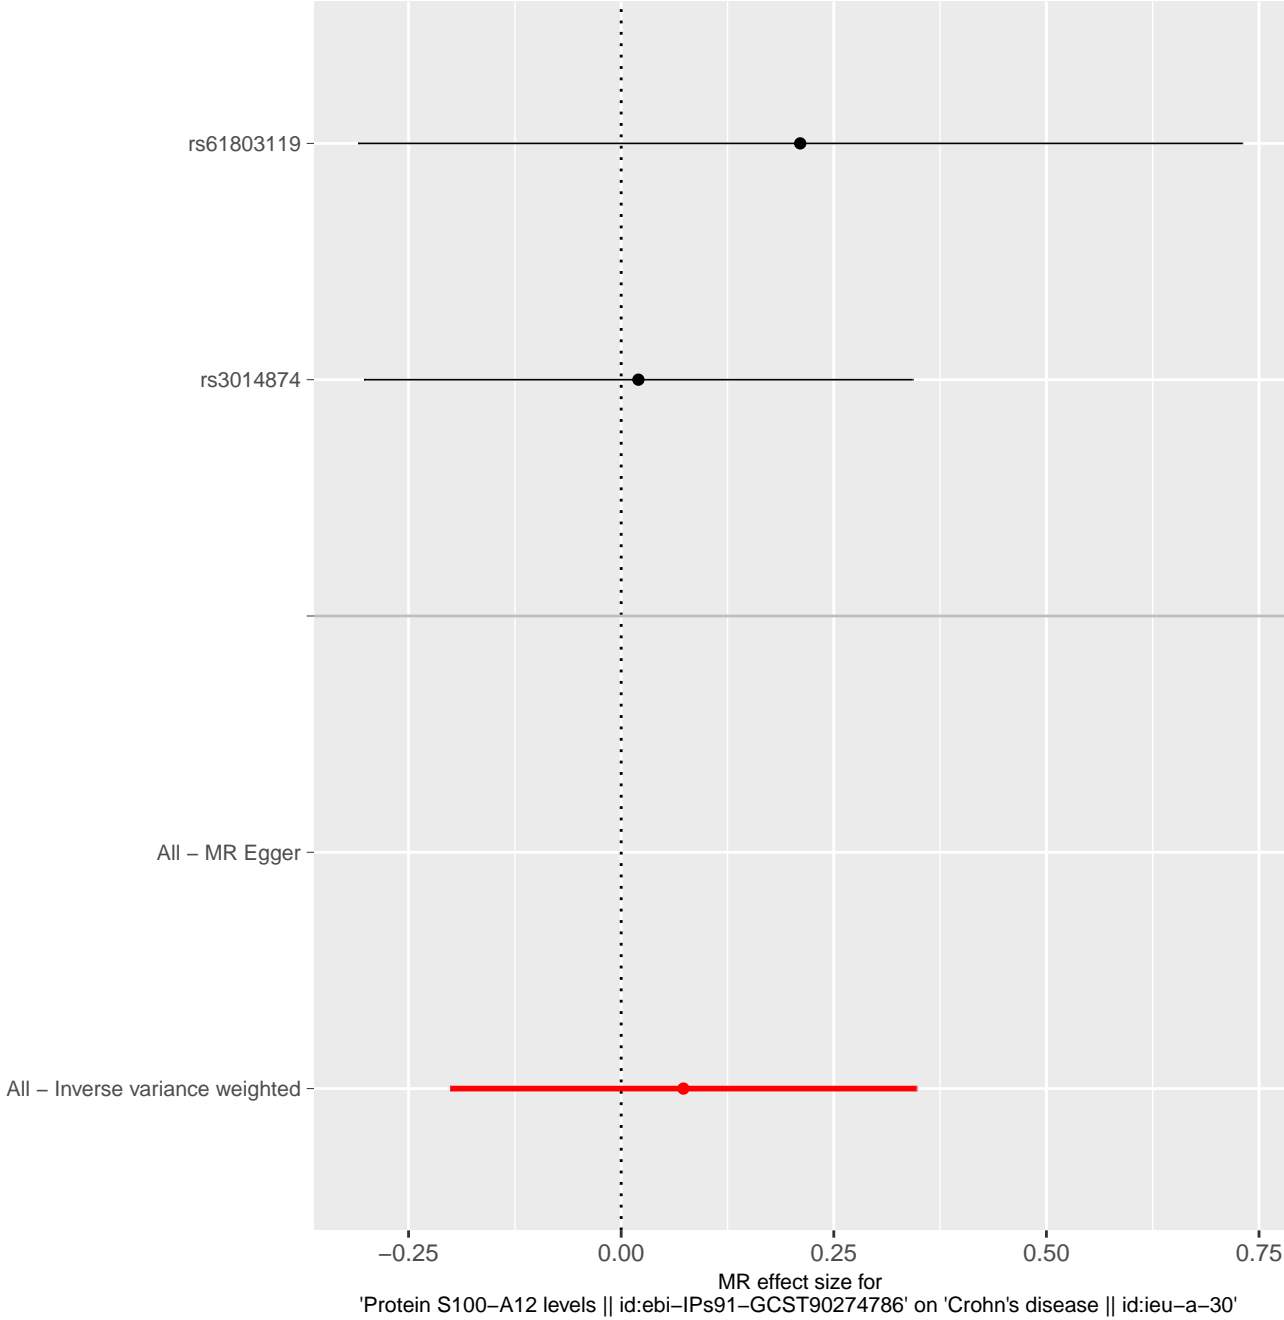



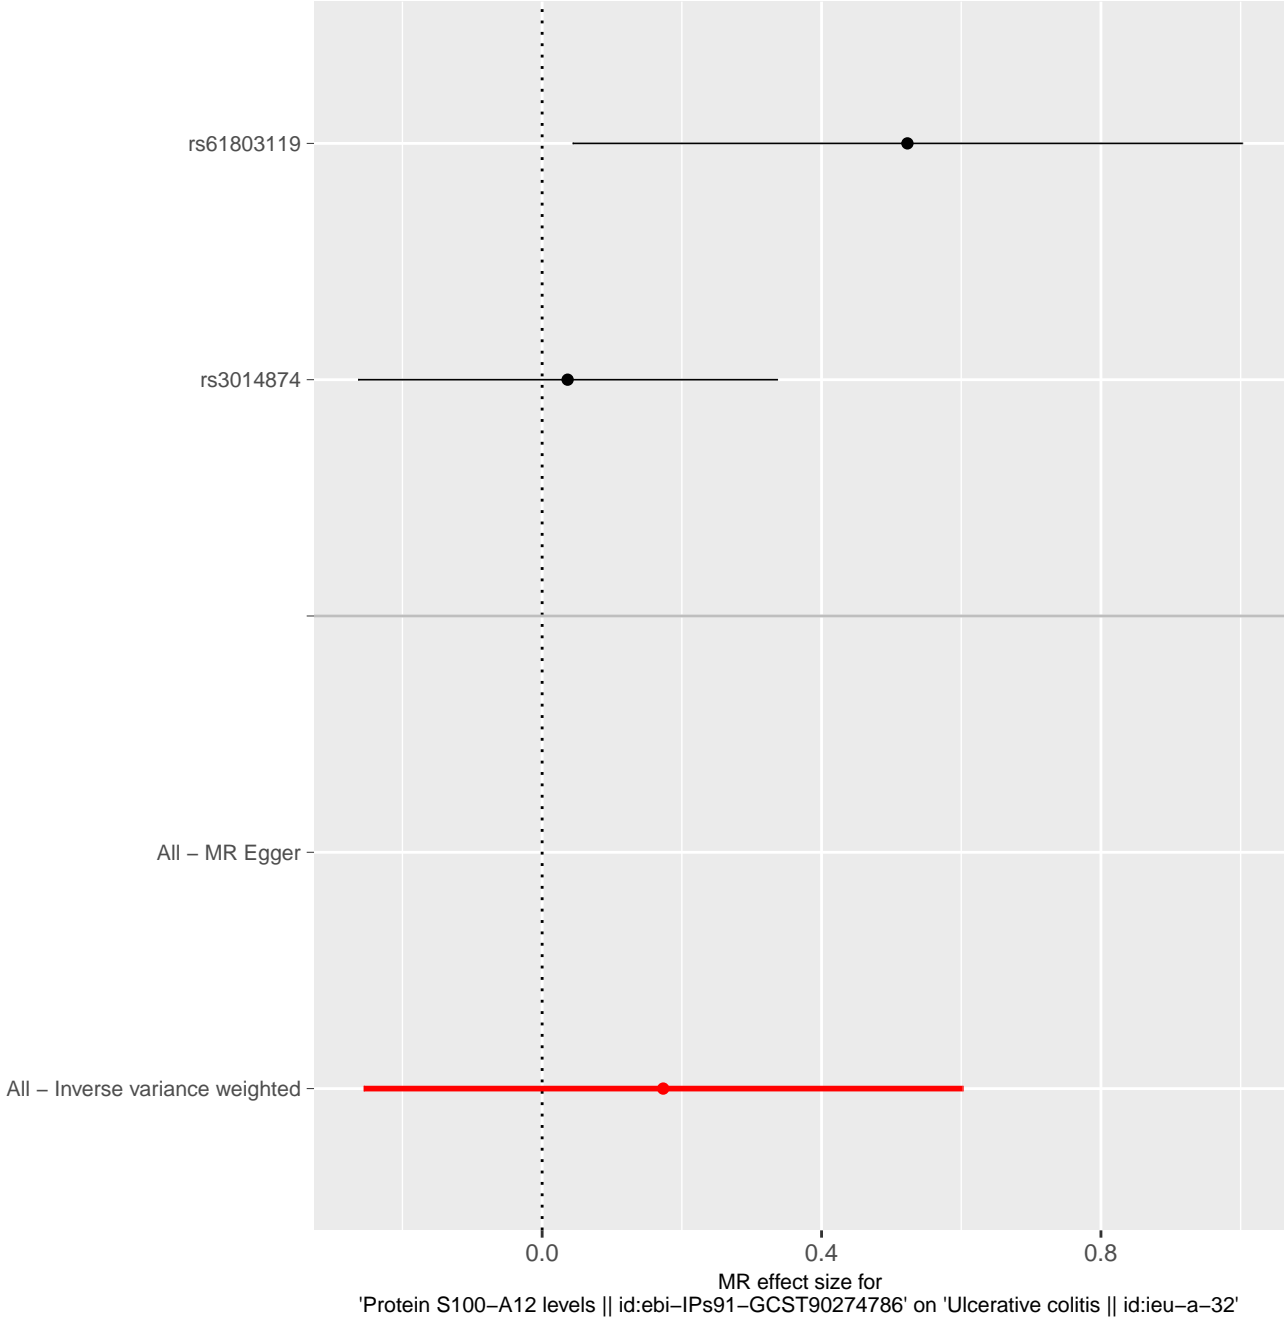

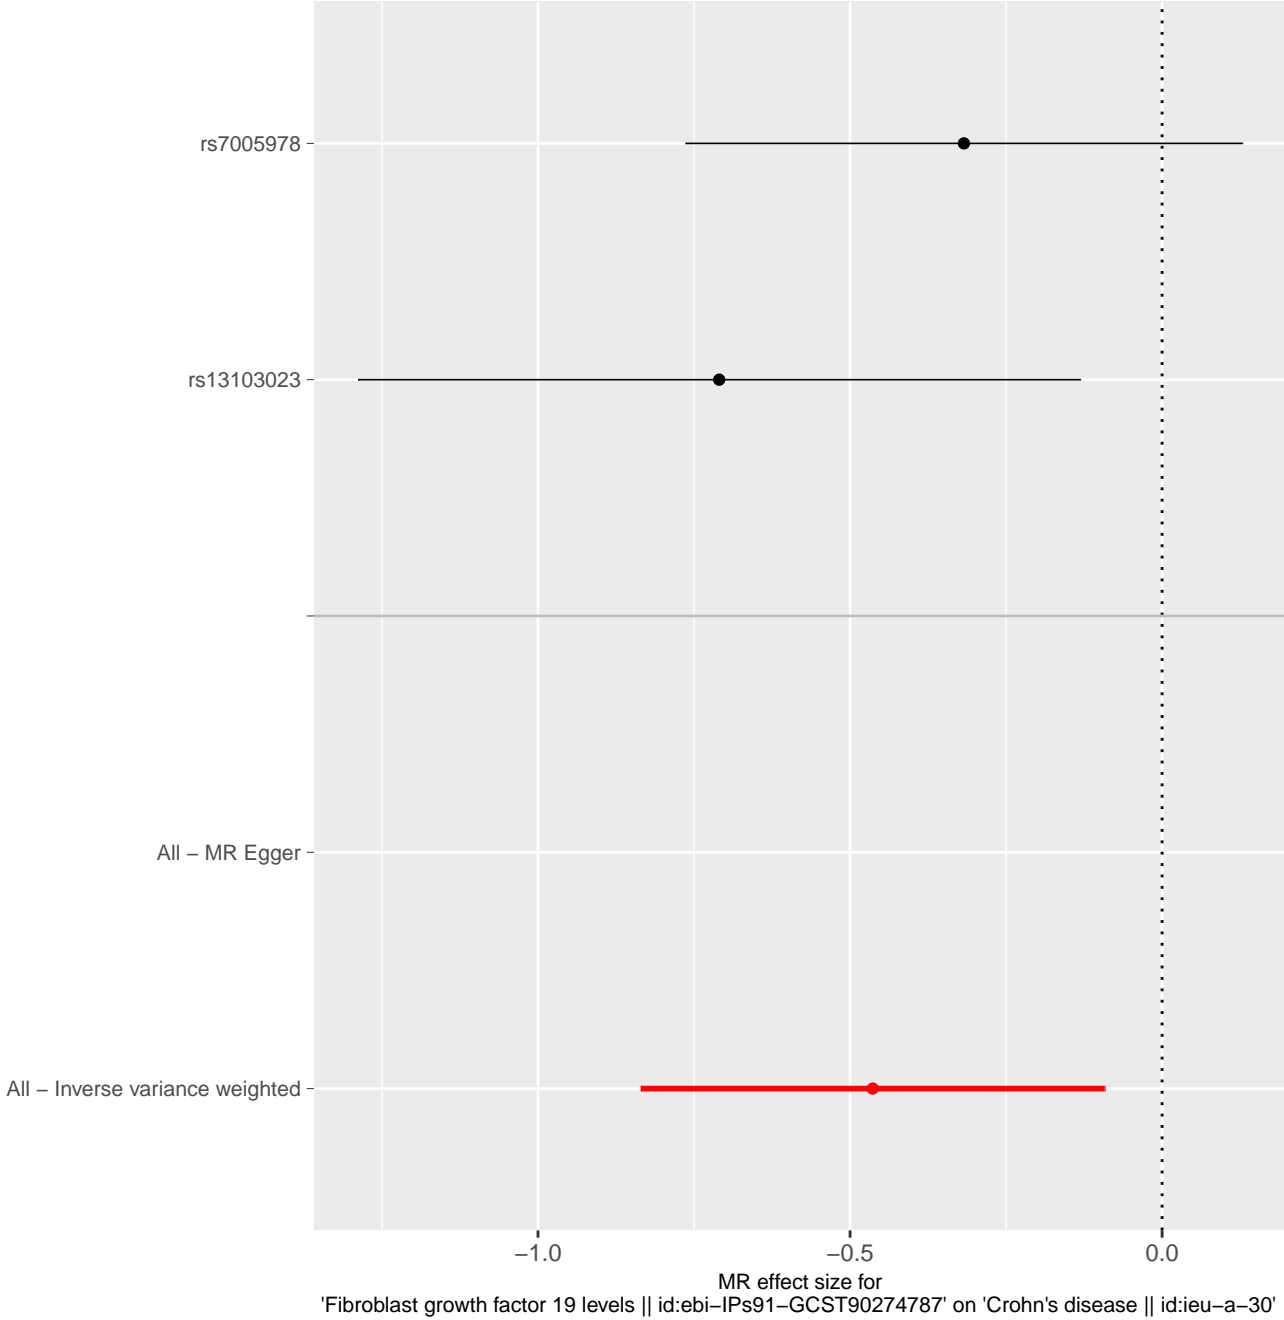

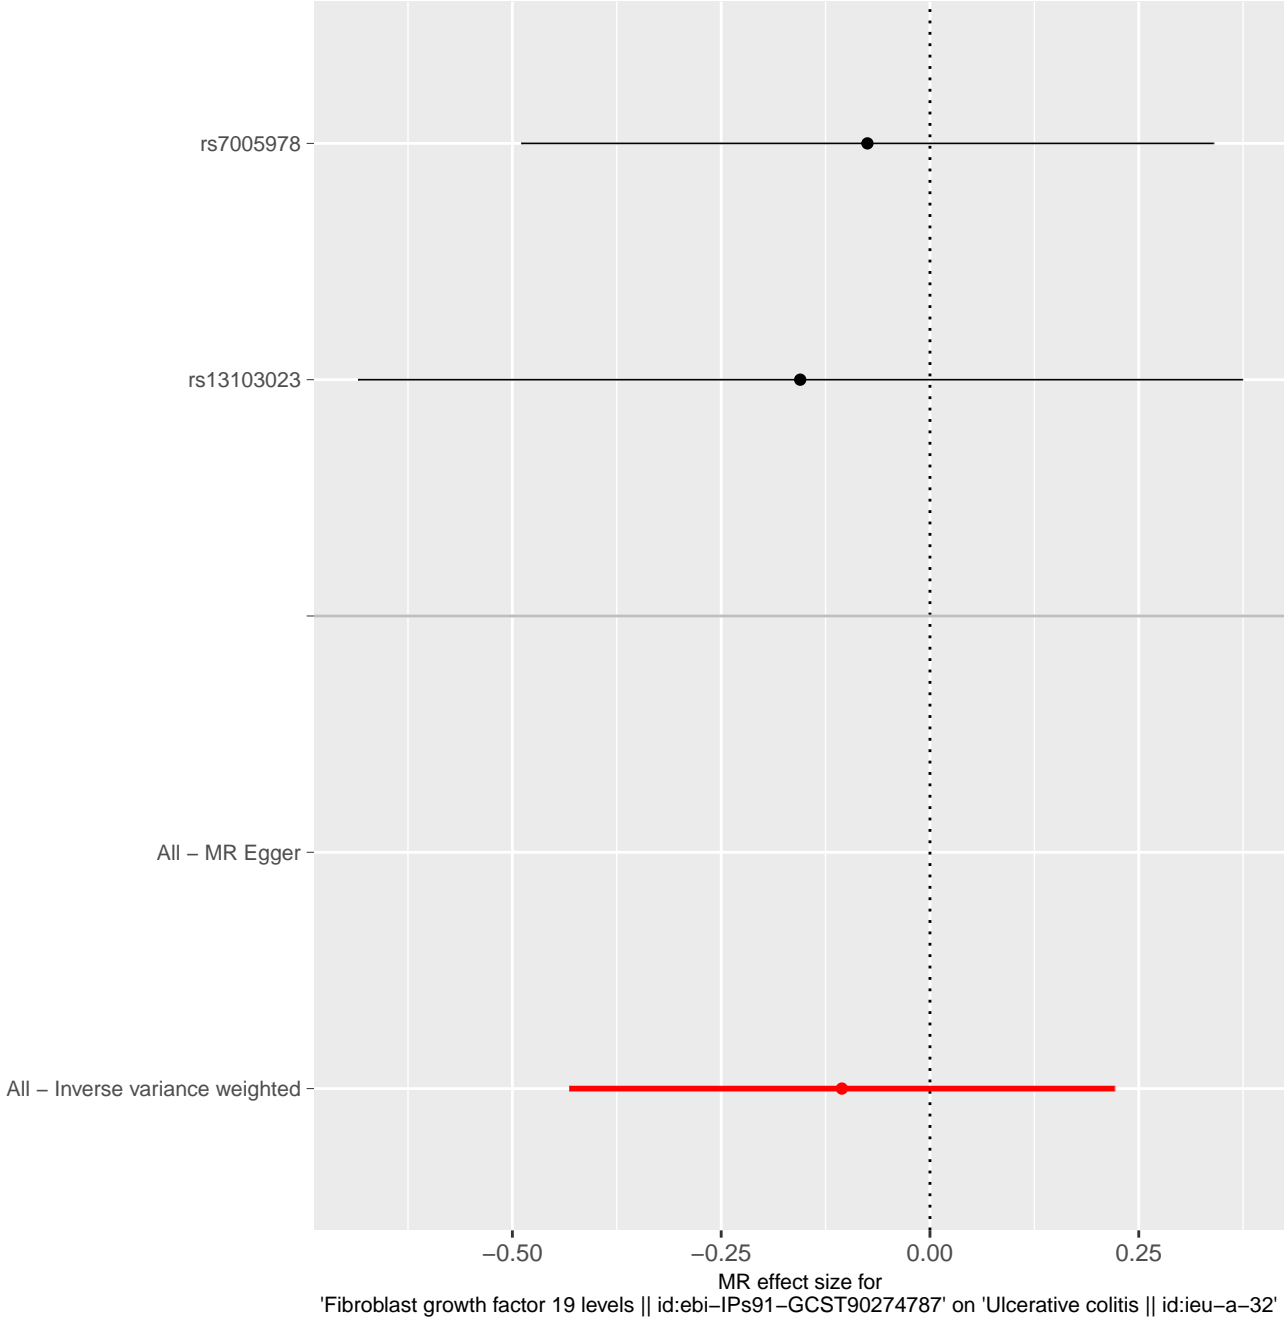

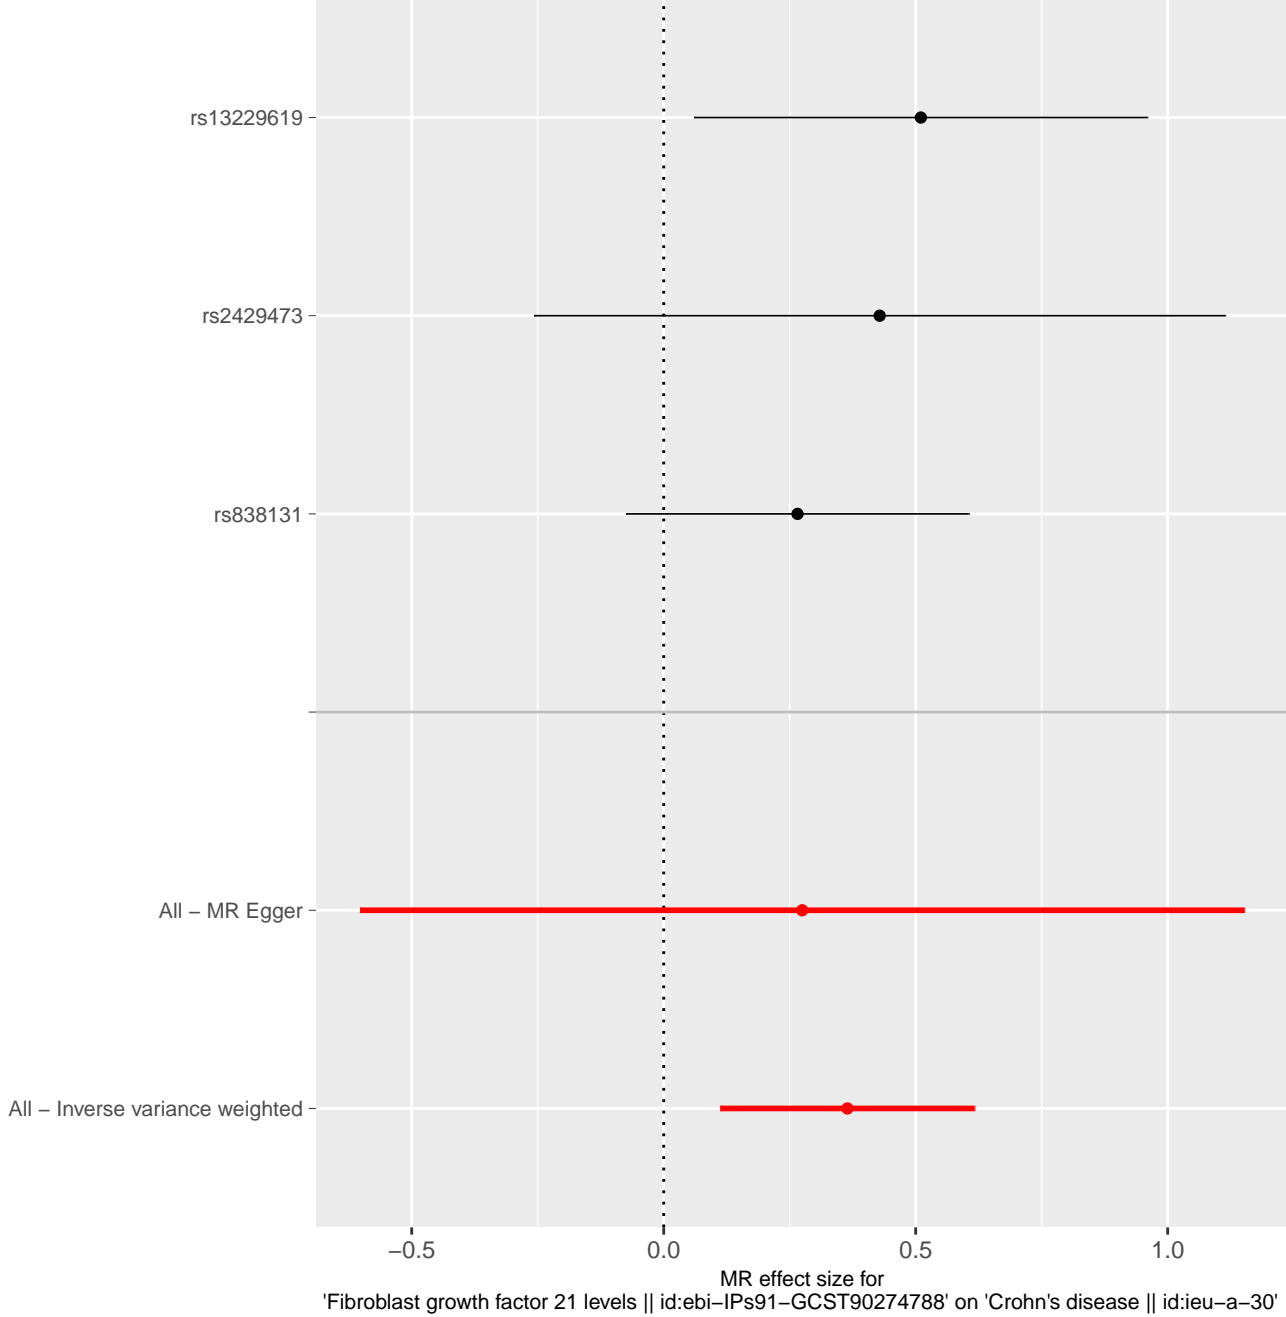

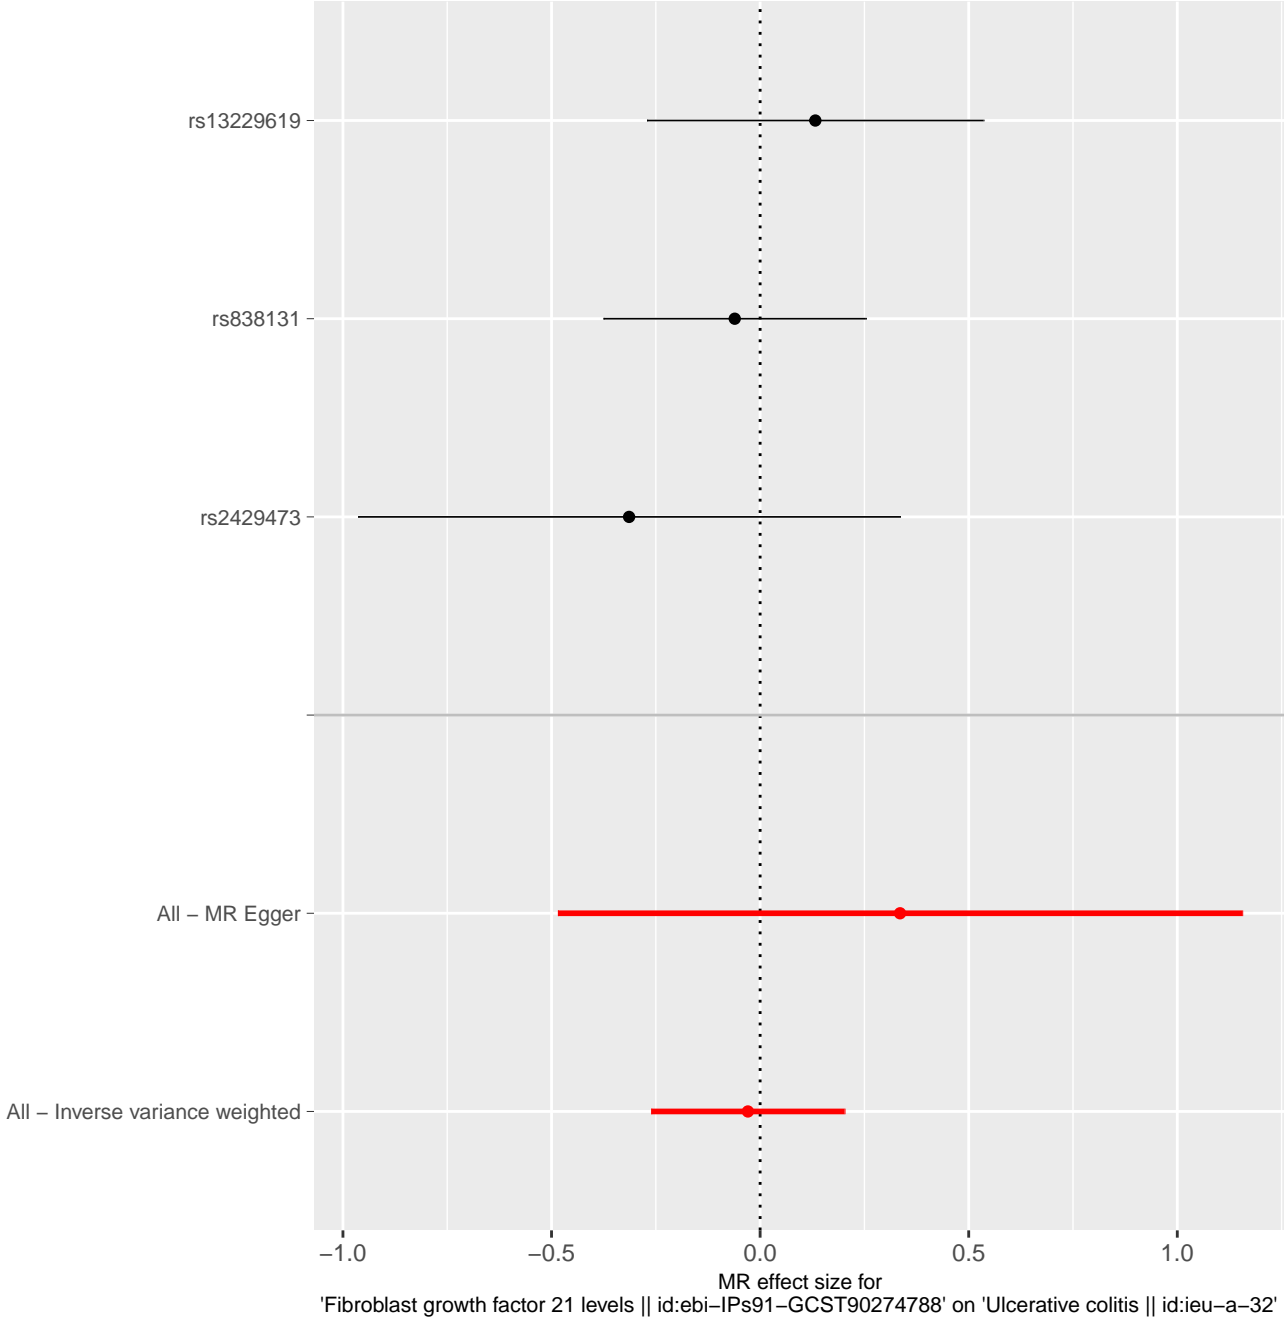

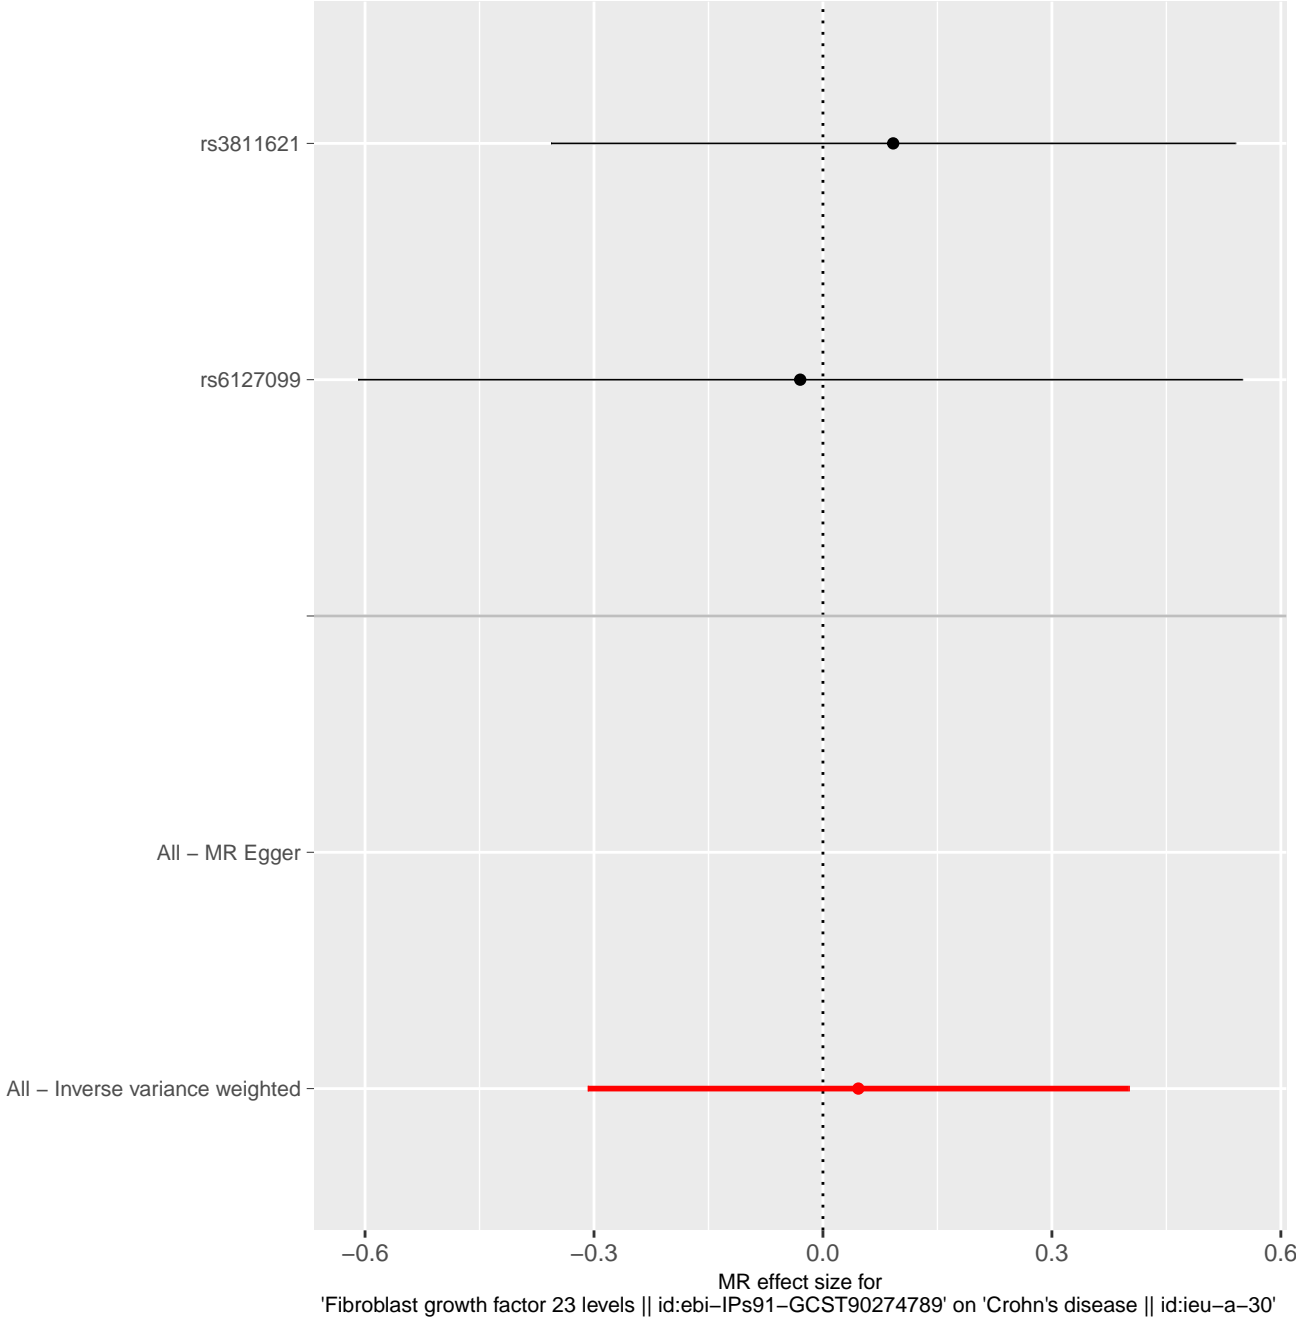

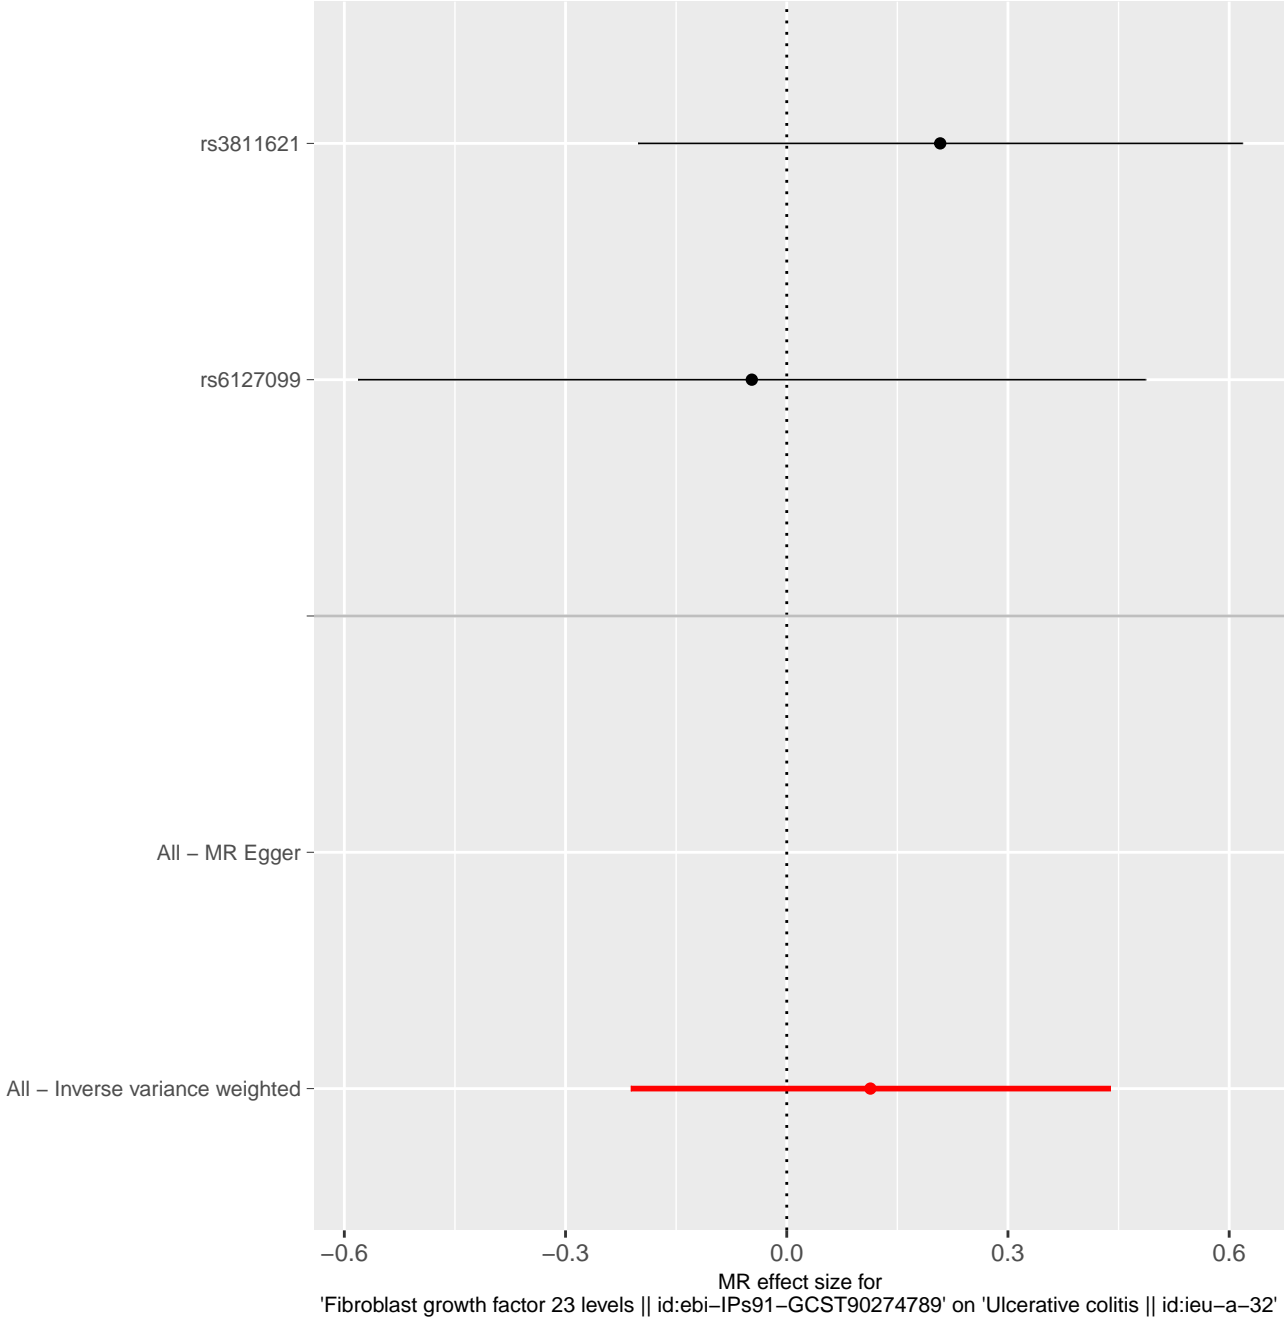

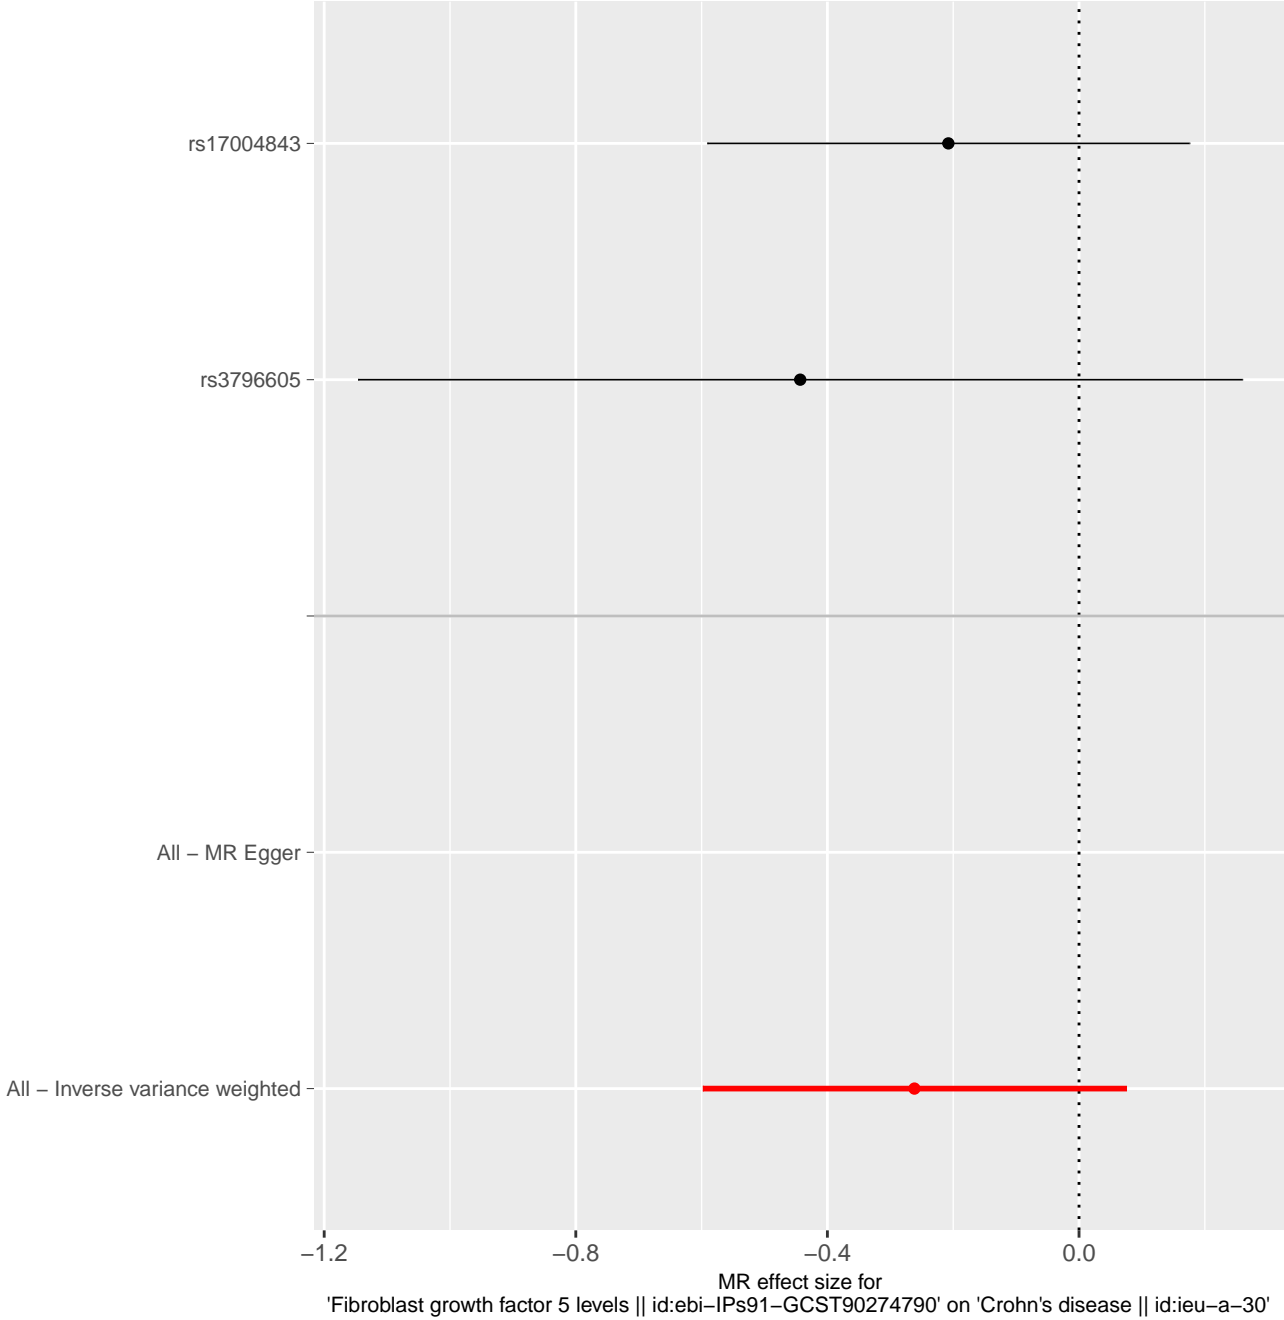



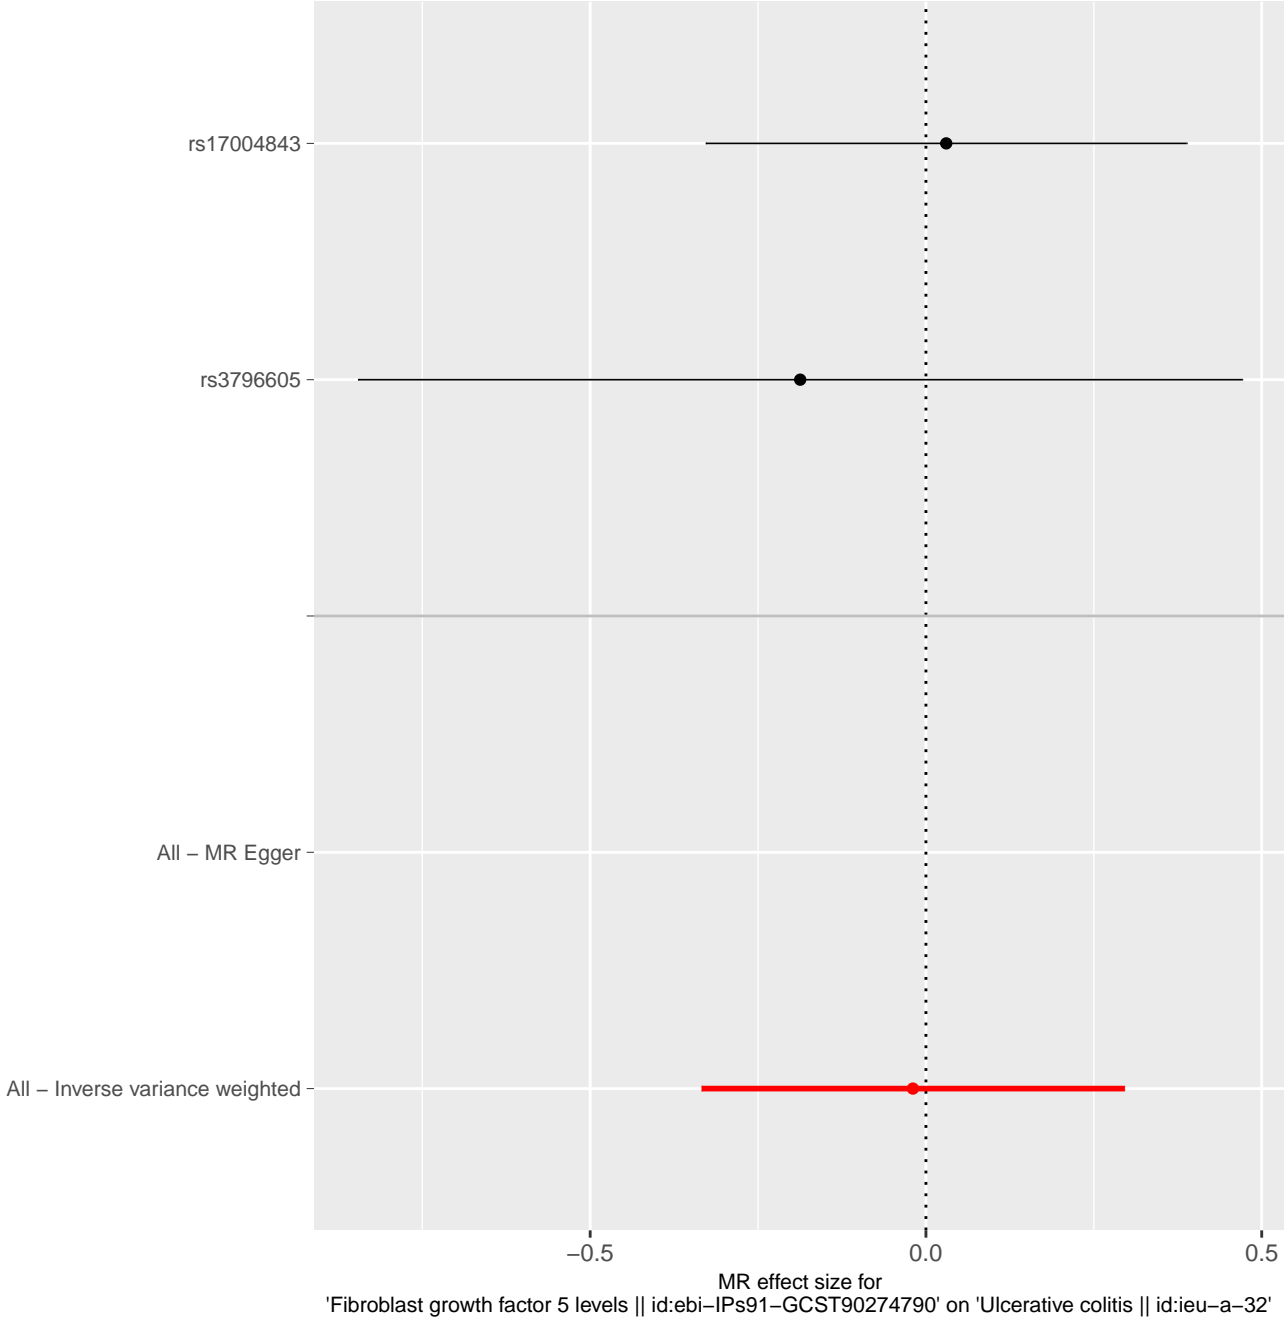

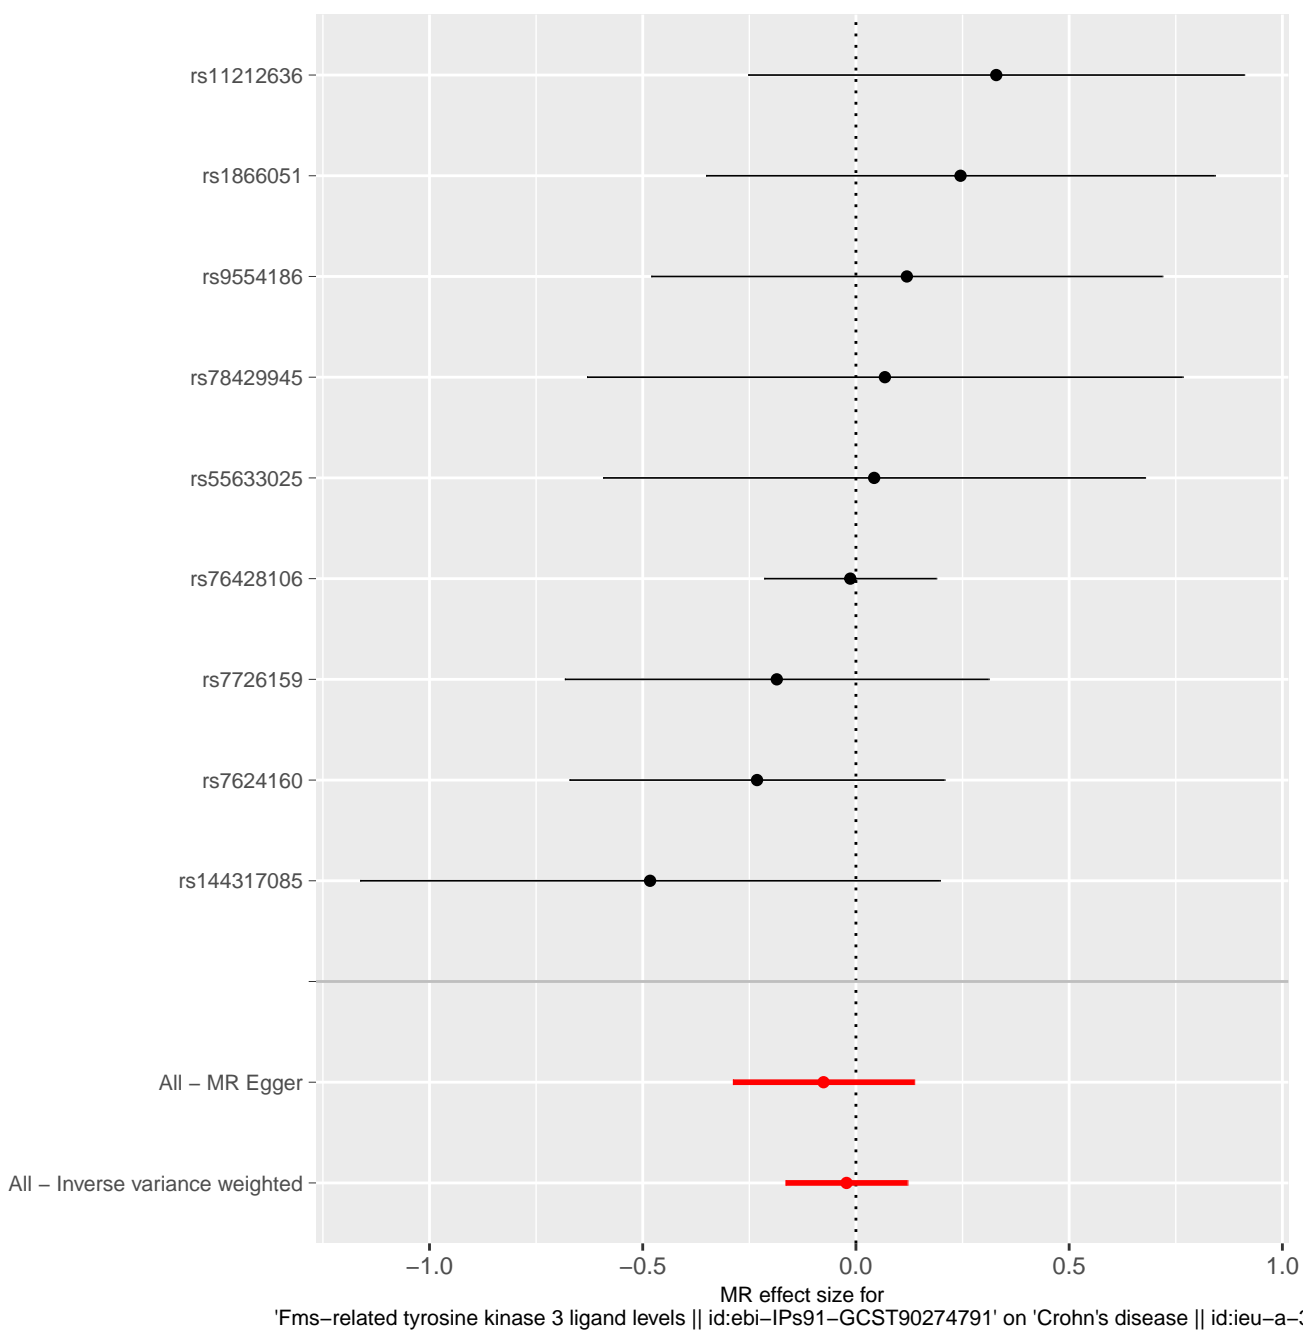

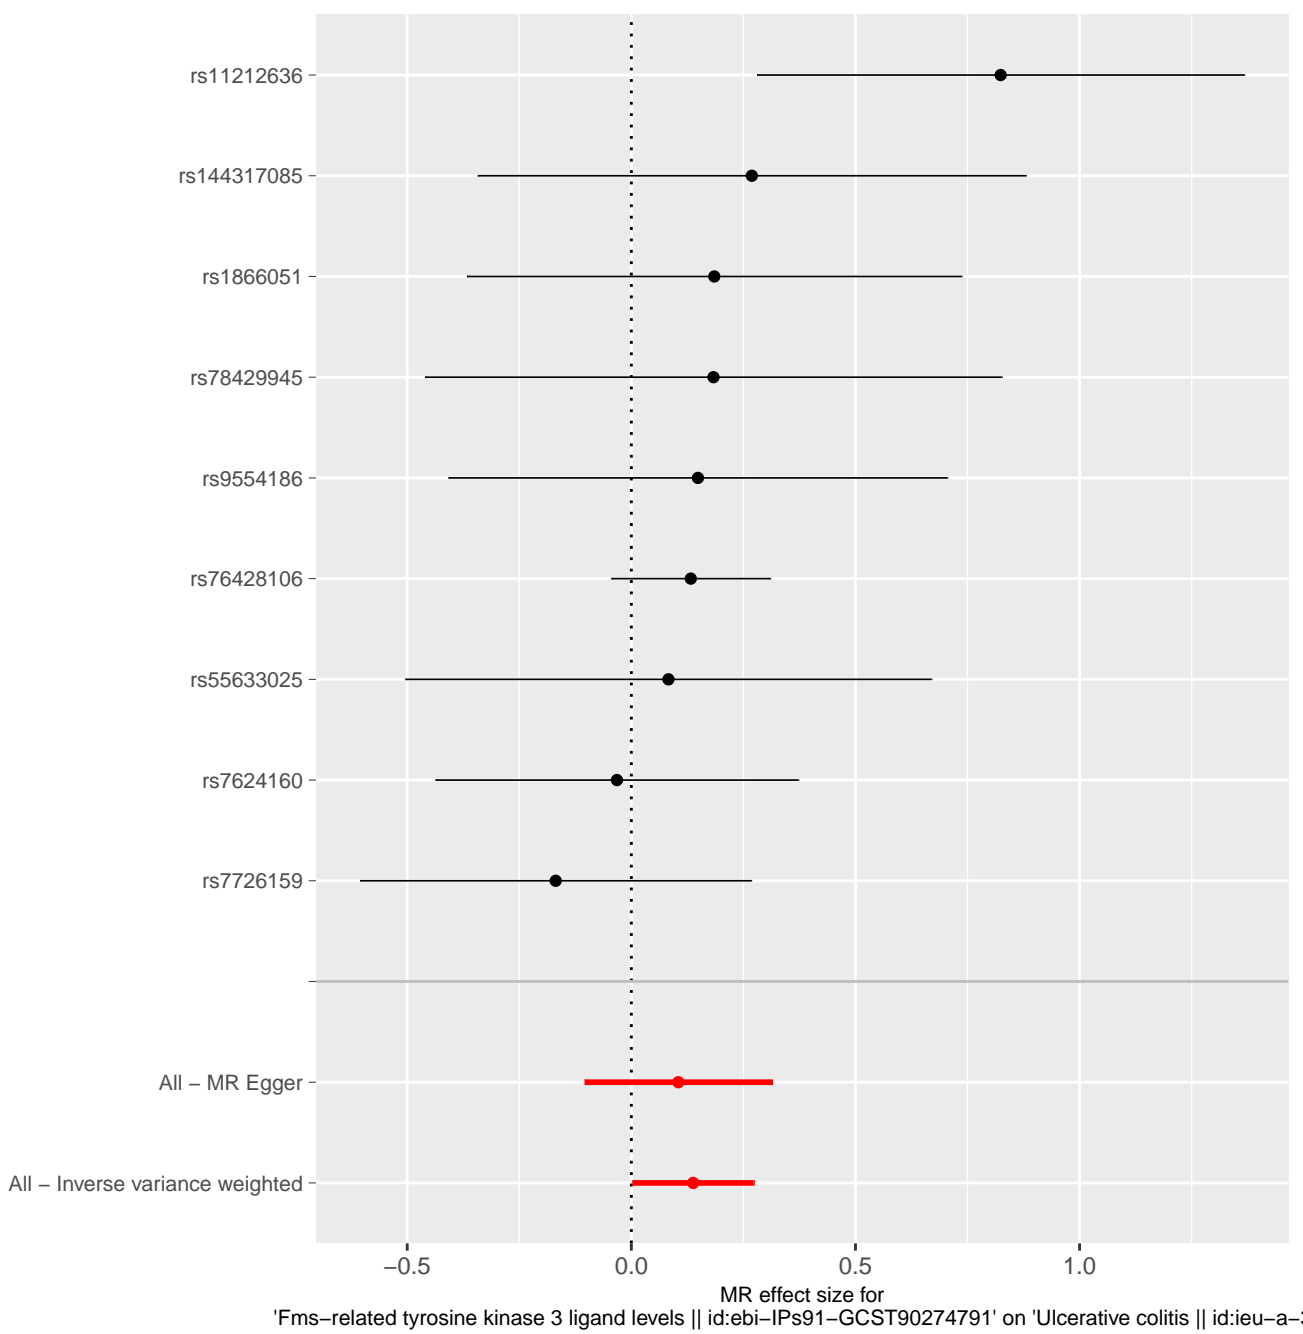

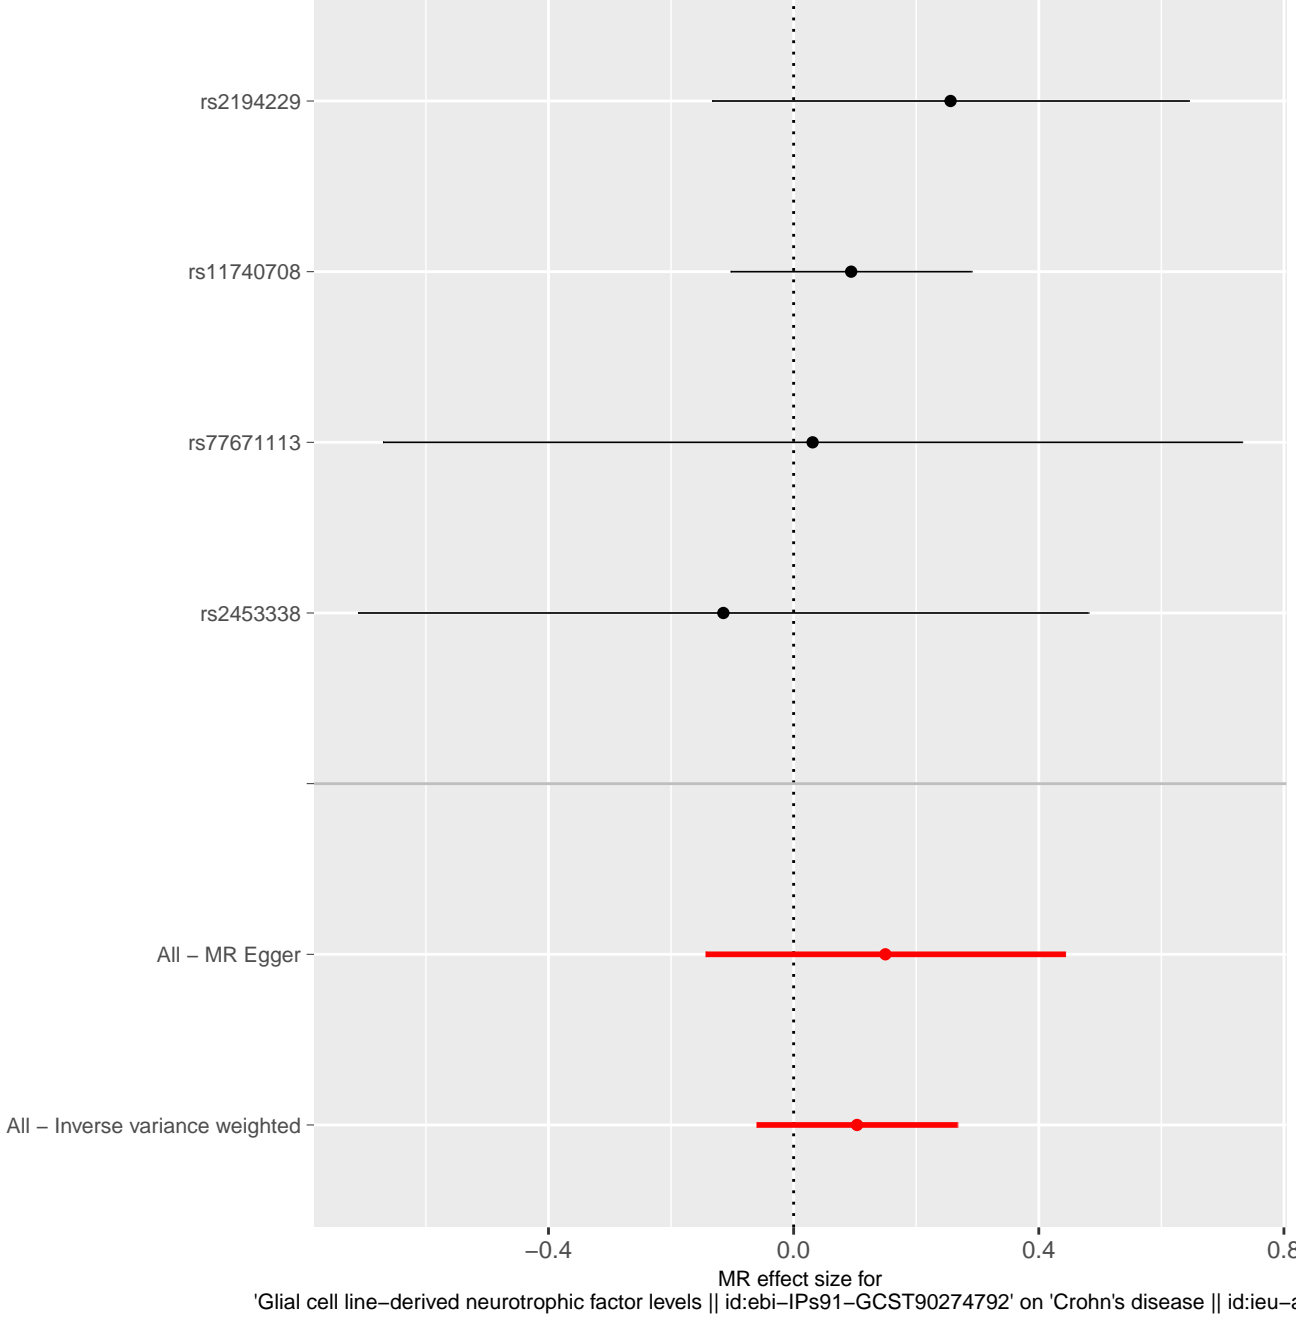

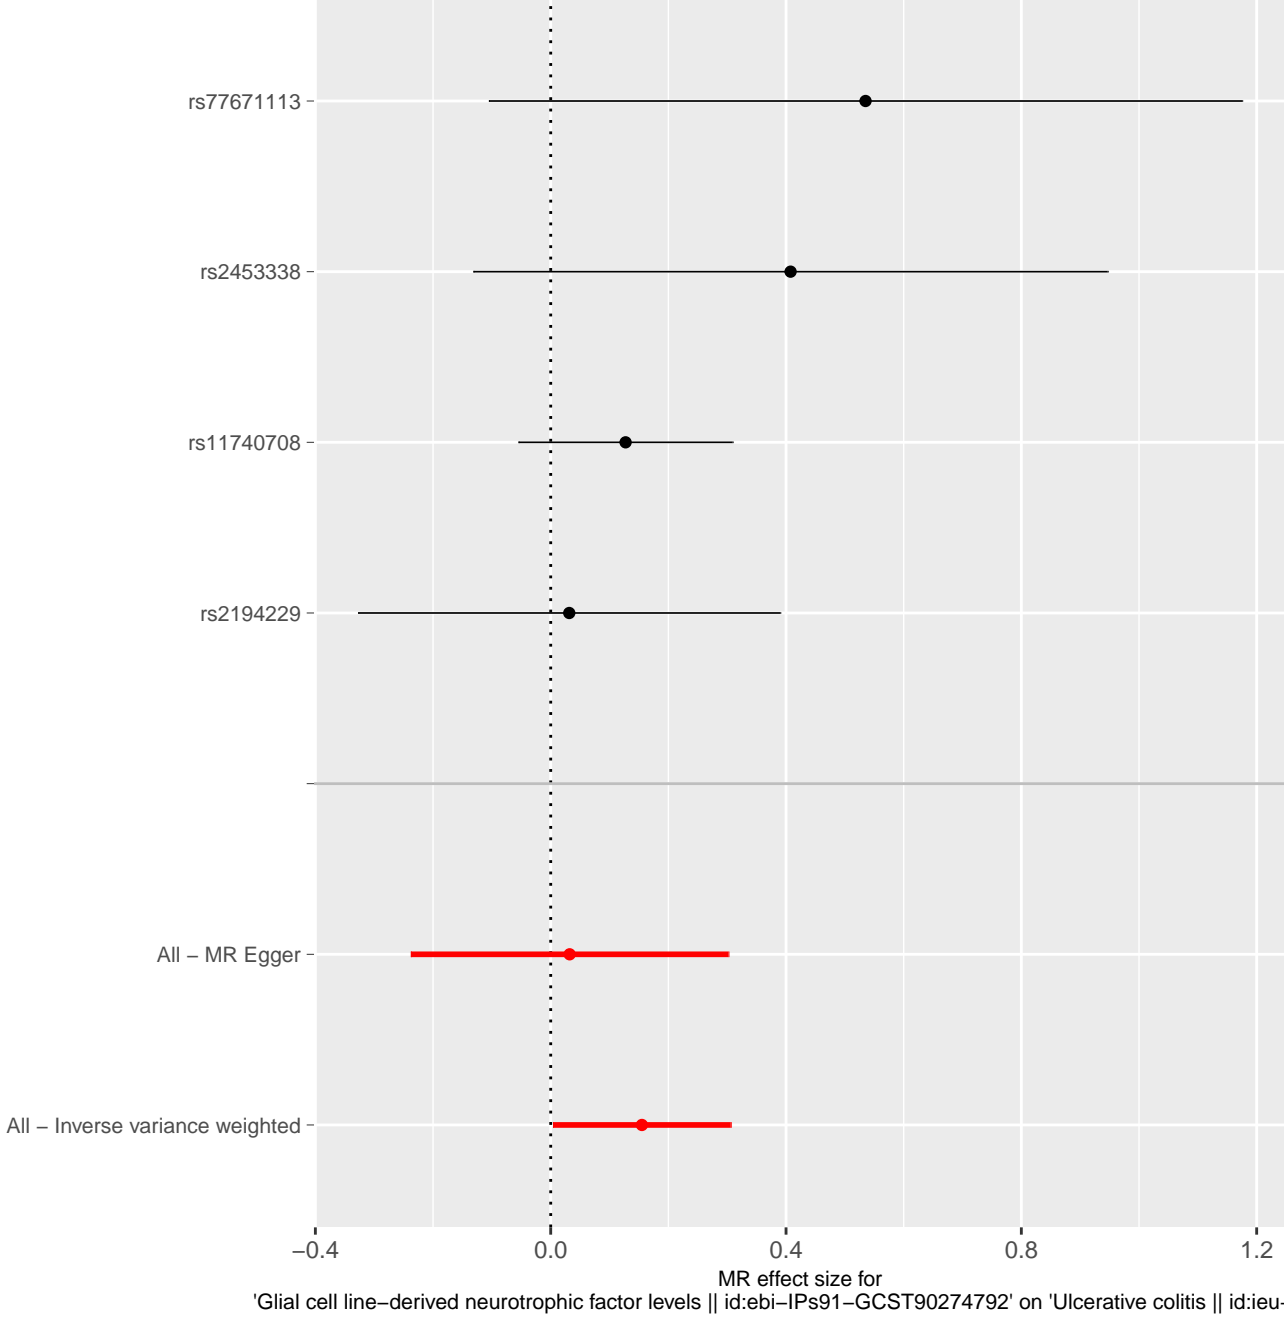

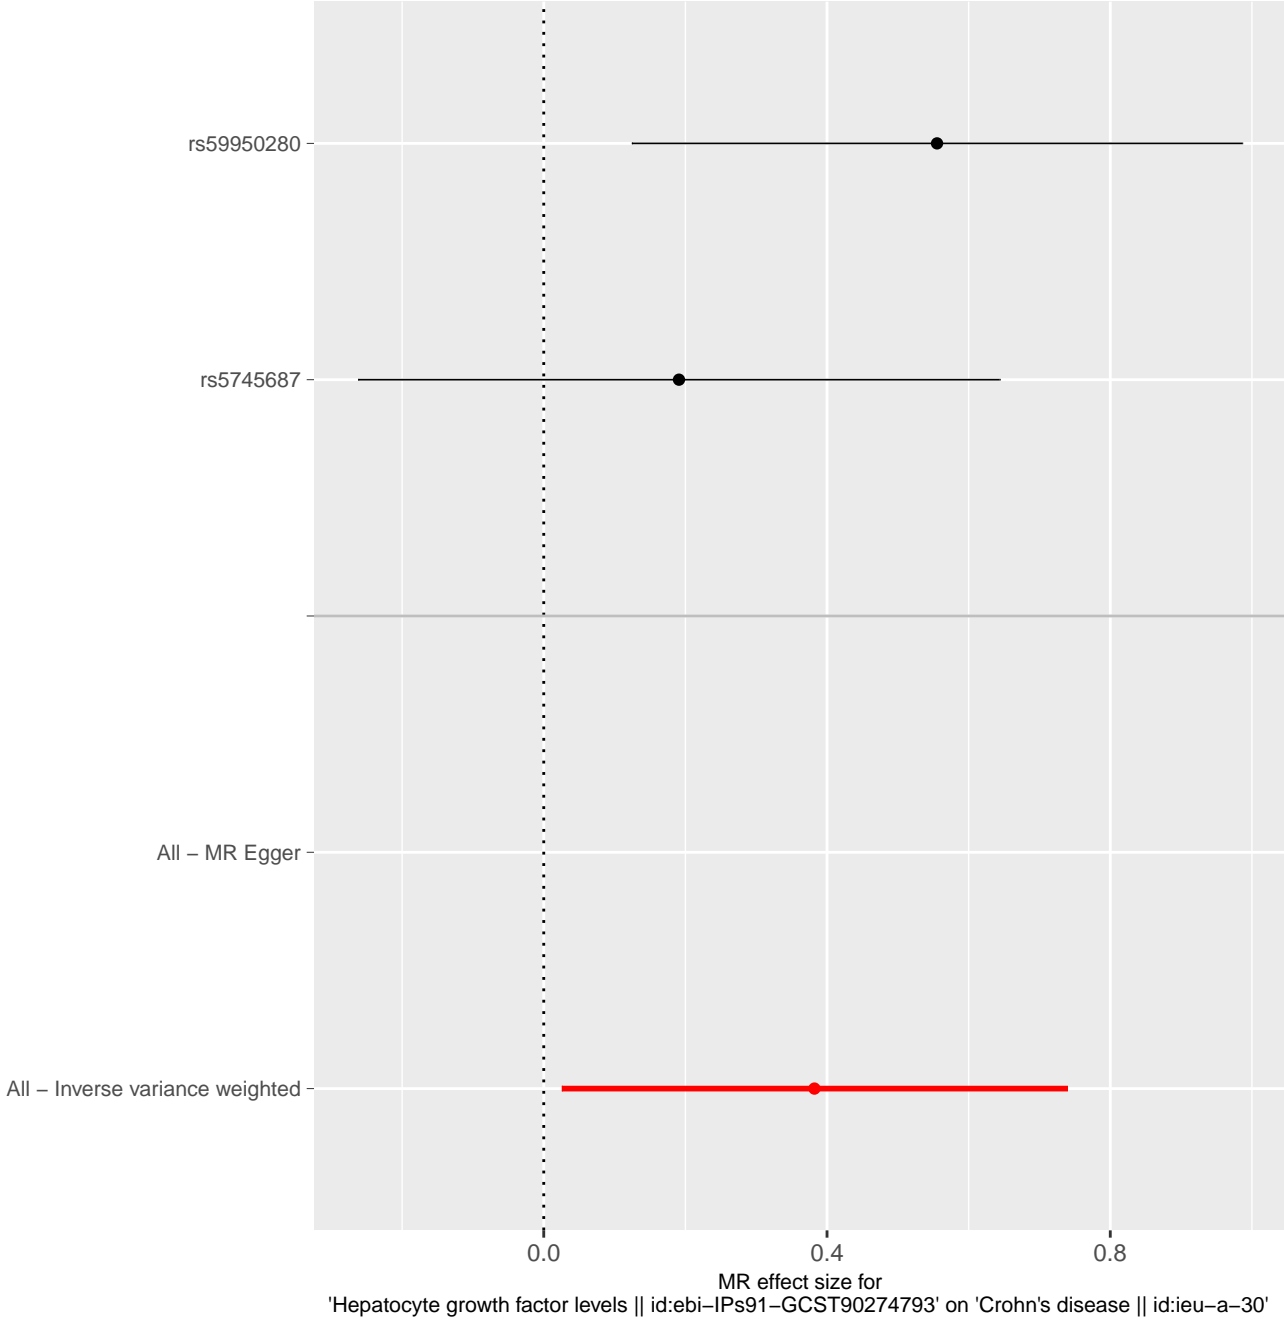

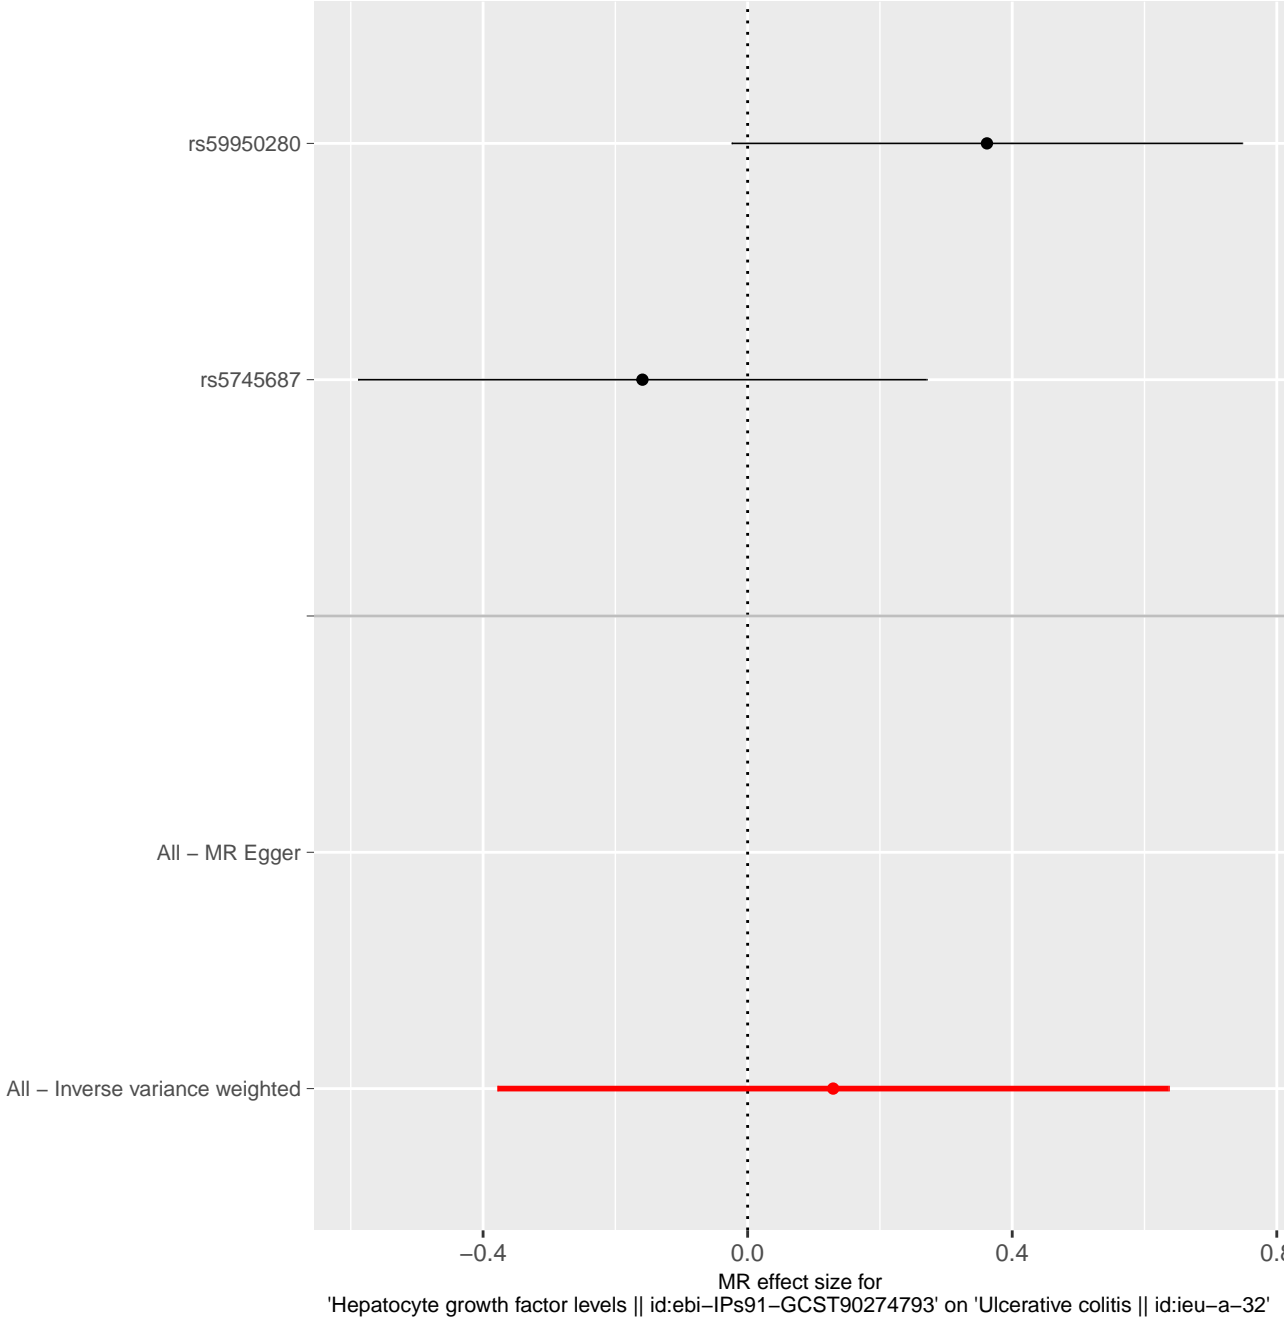

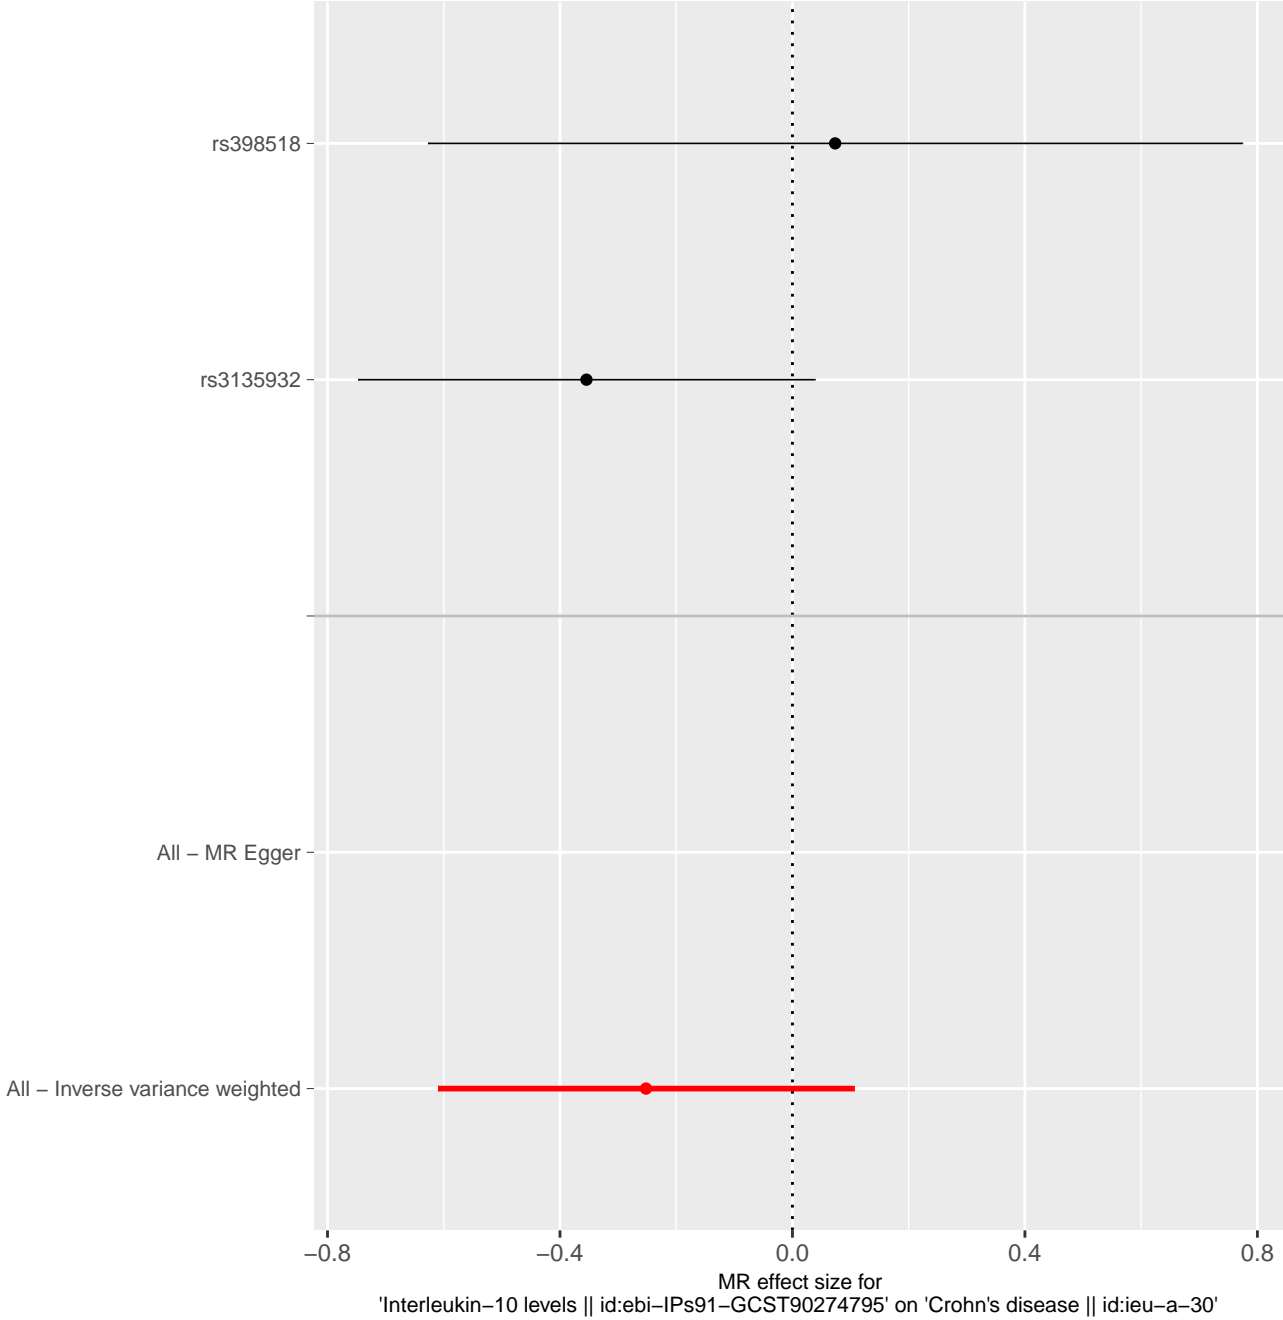



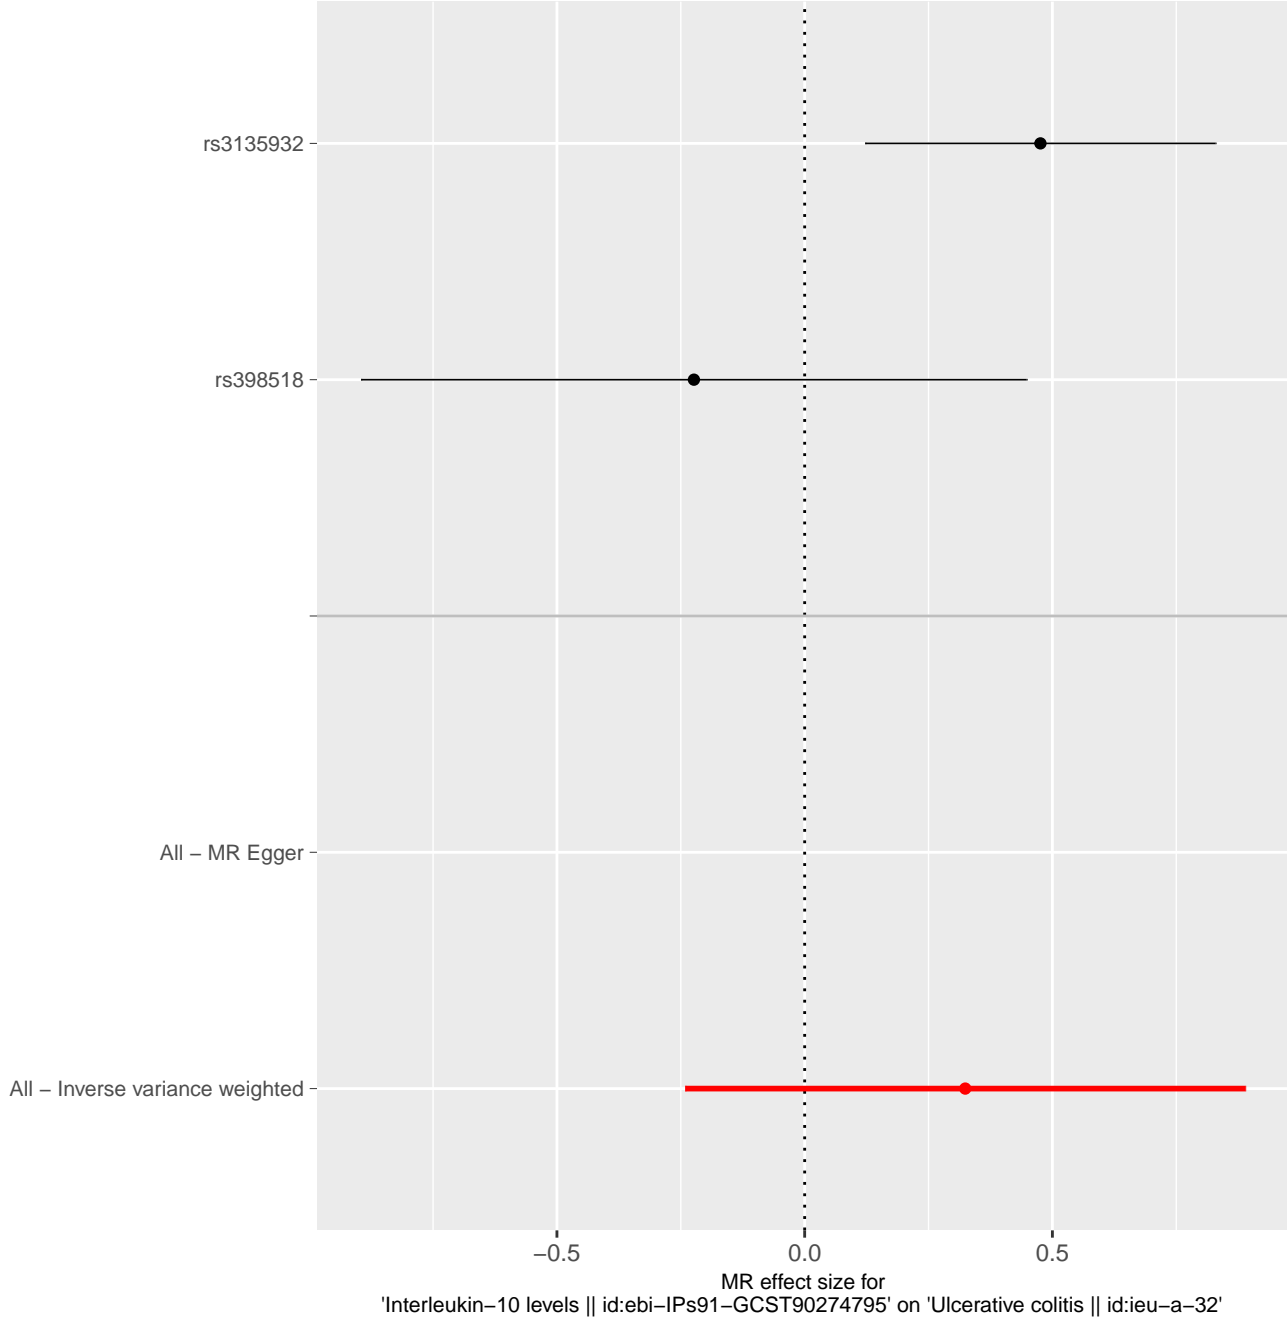

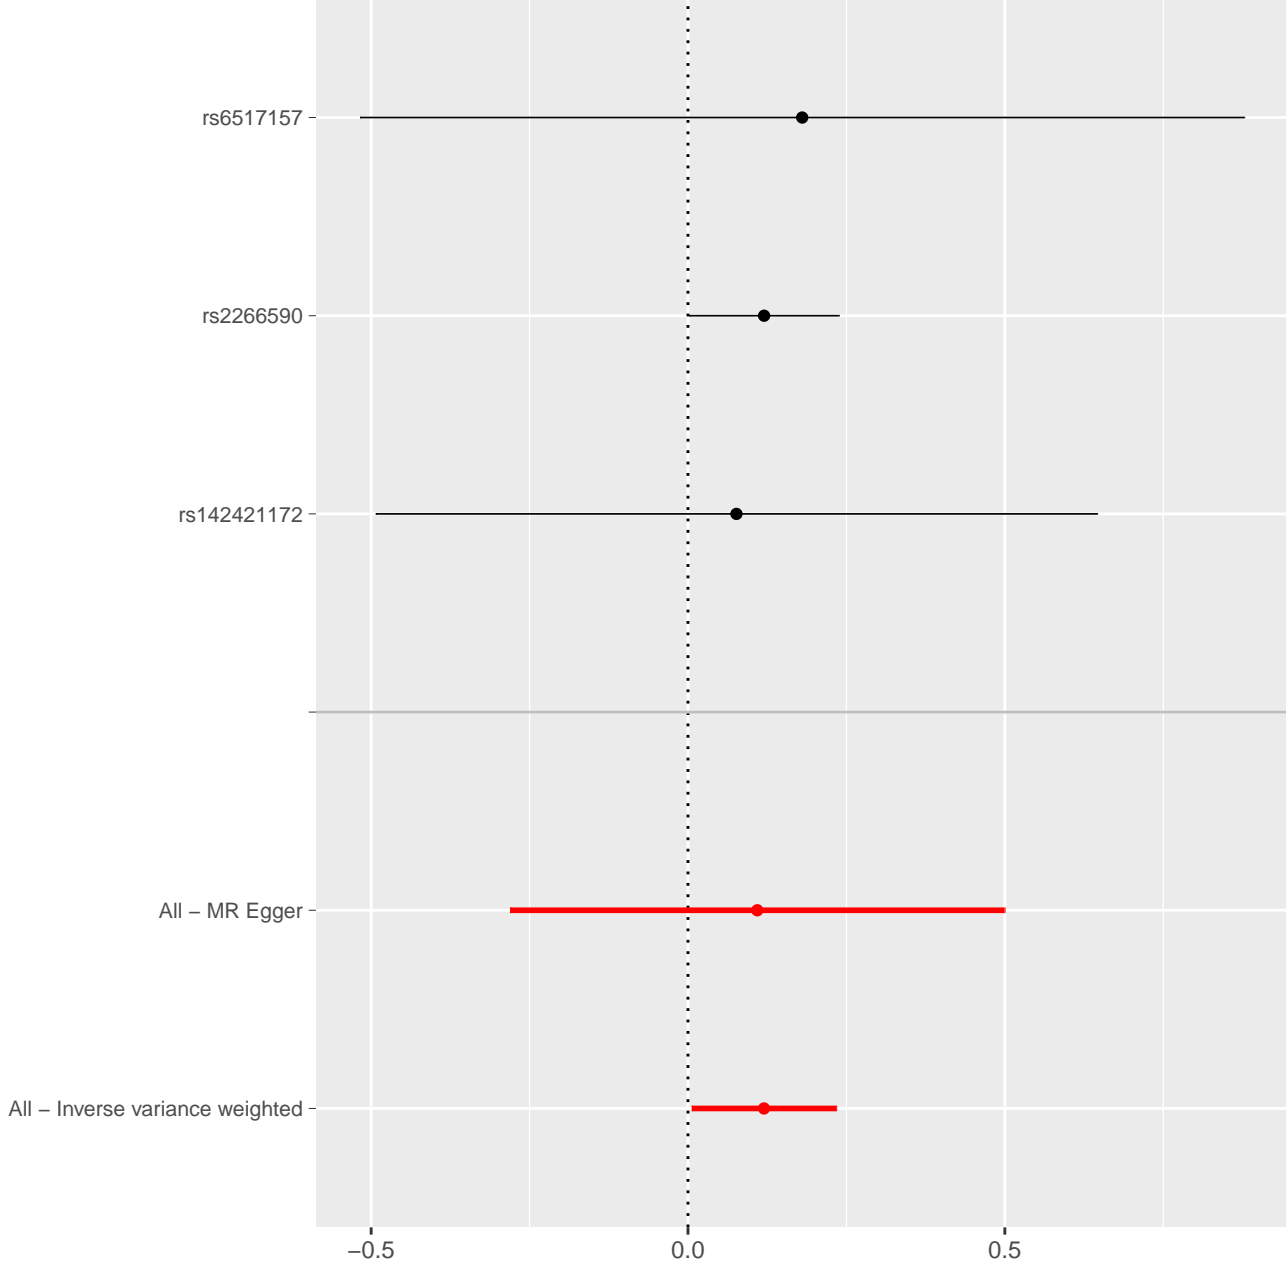

MR effect size for  
'Interleukin-10 receptor subunit beta levels || id:ebi-IPs91-GCST90274797' on 'Crohn's disease || id:ieu-a-3'

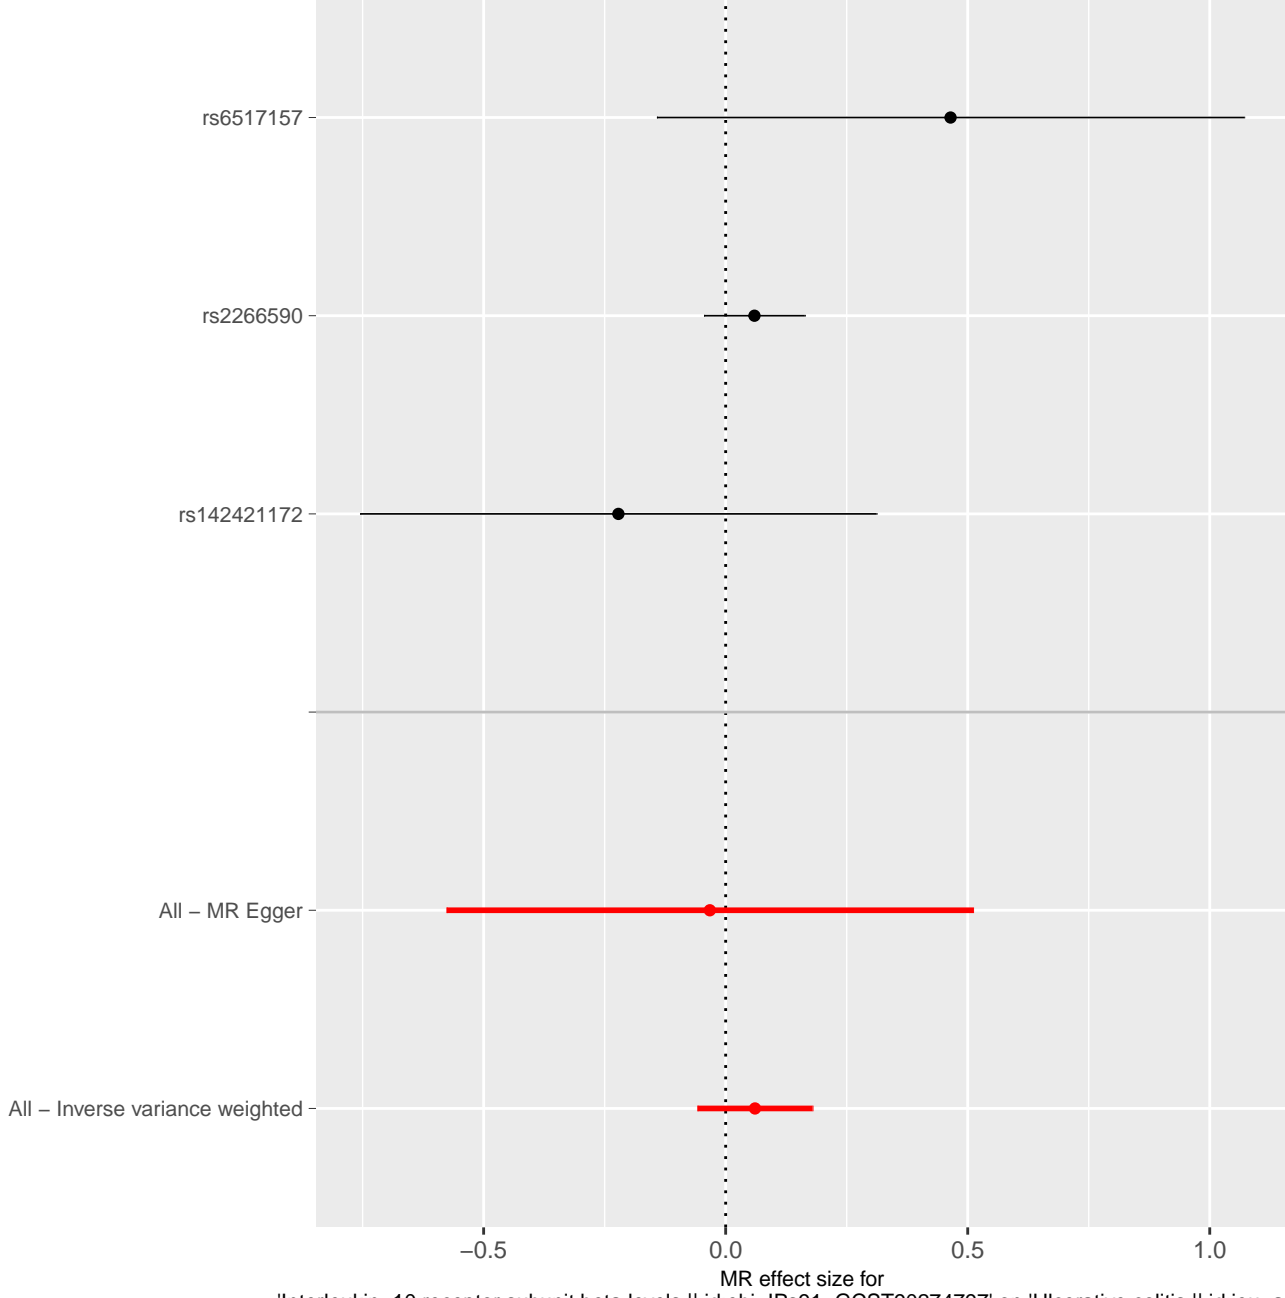

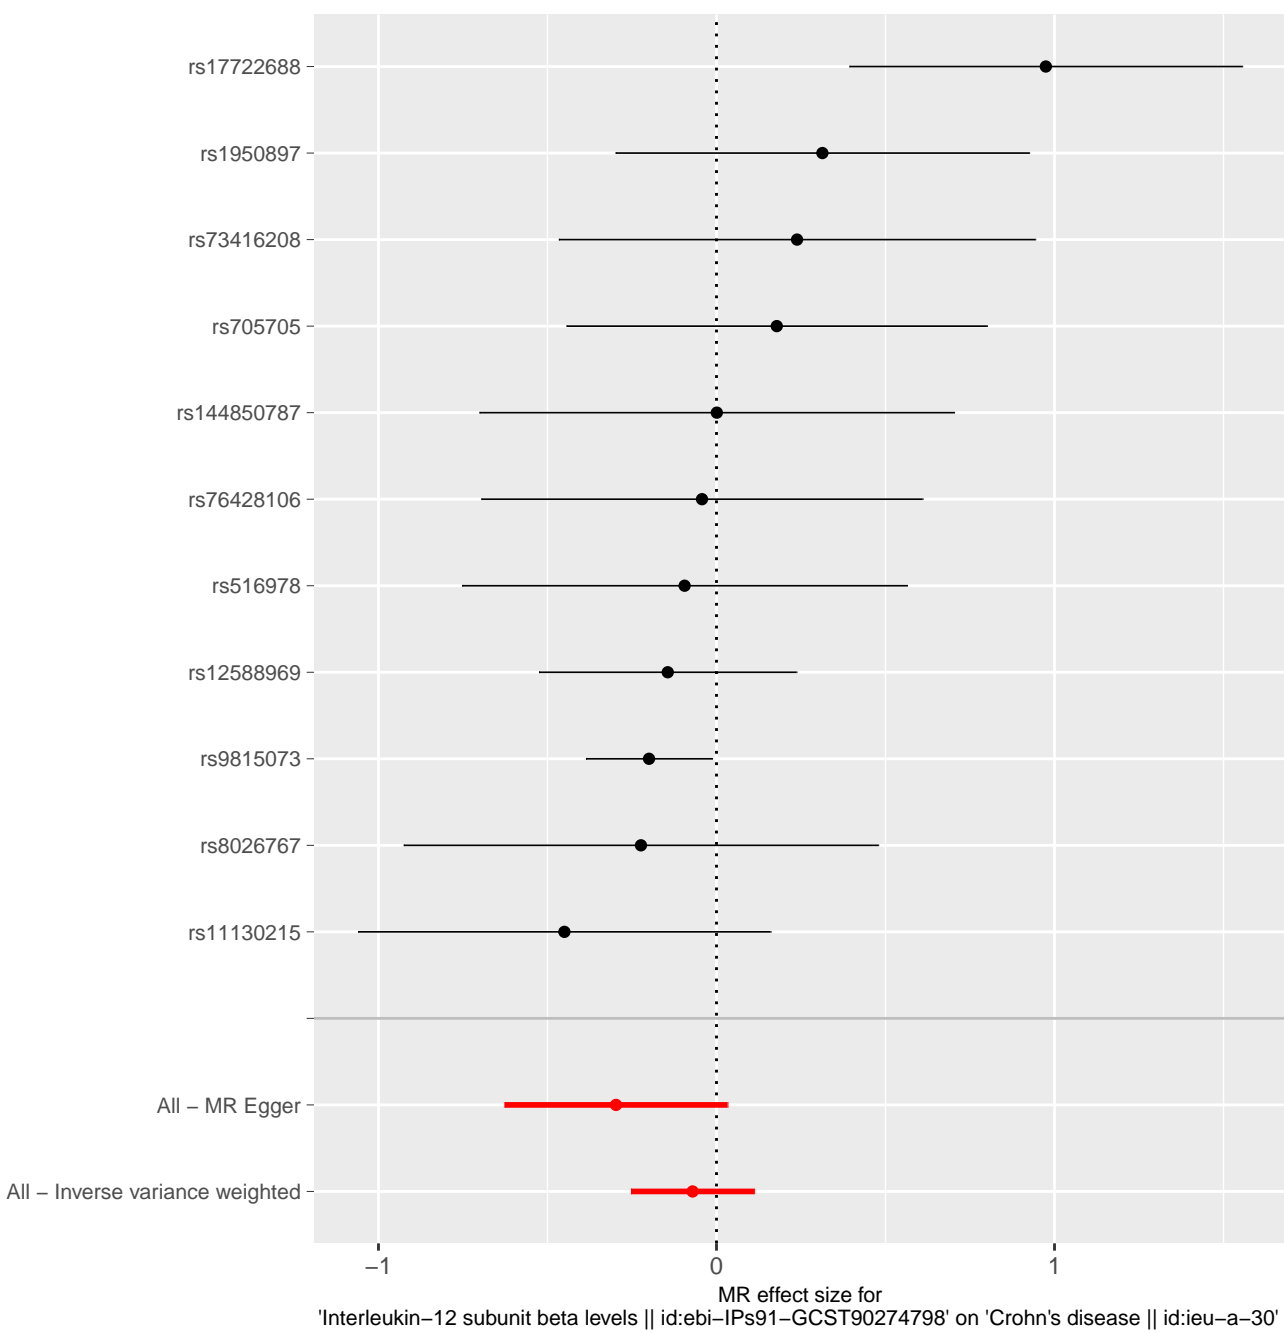

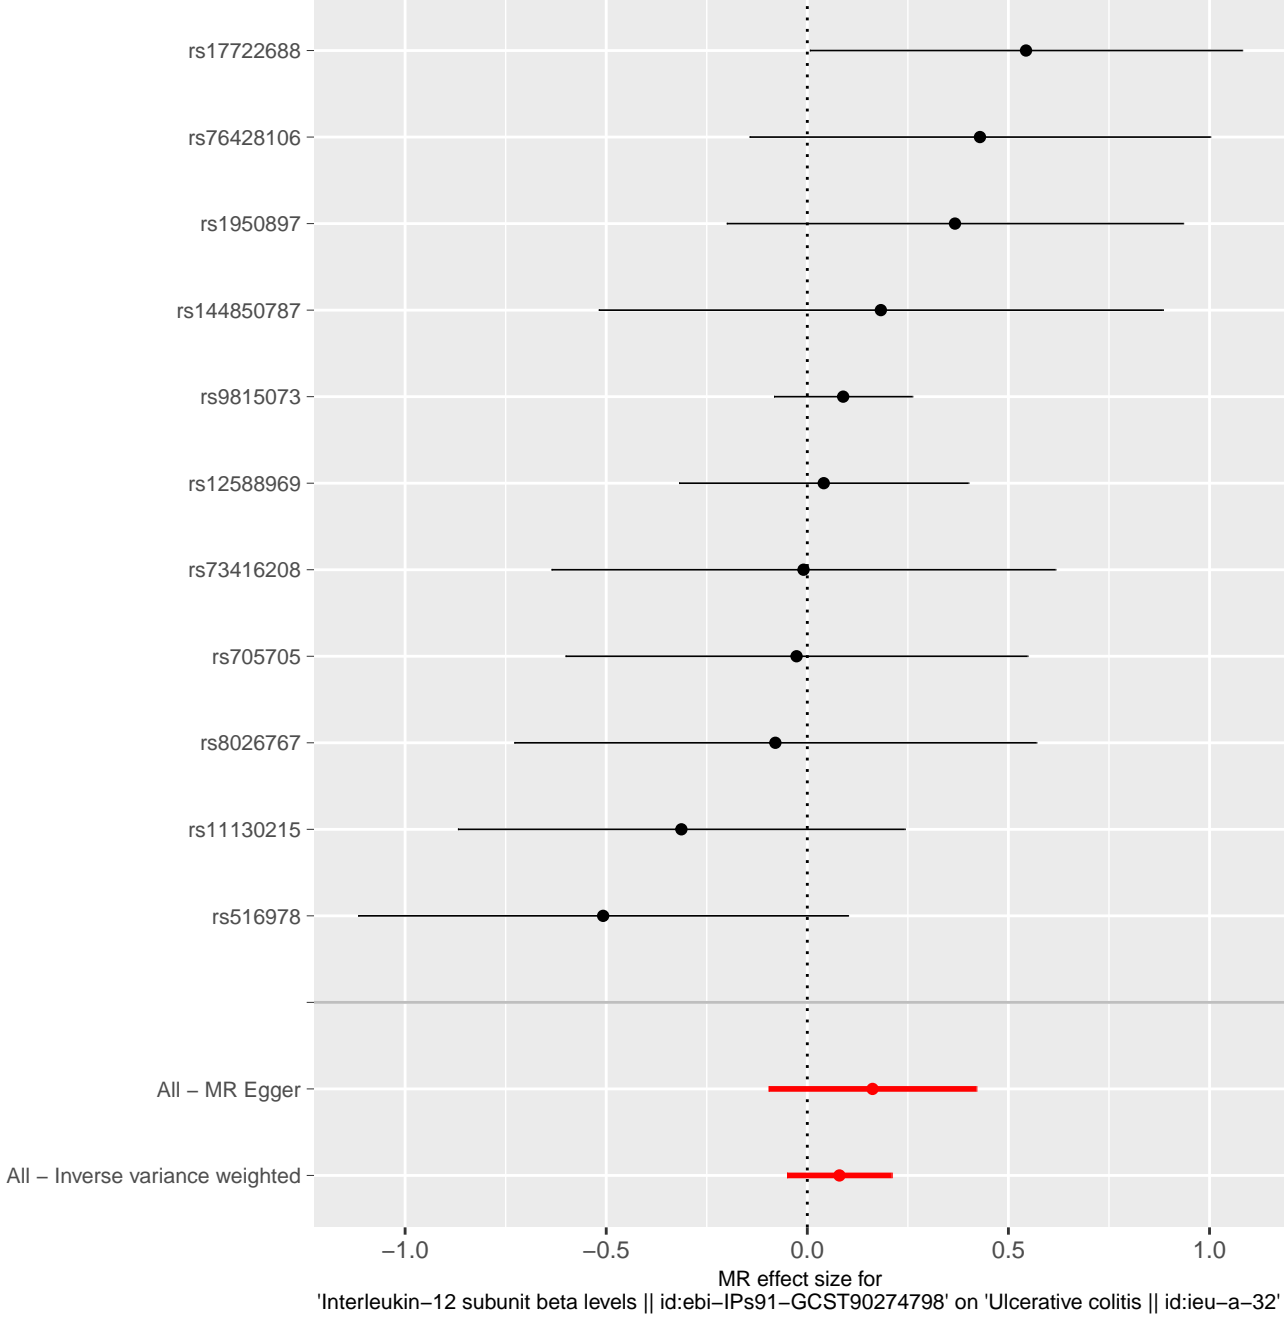

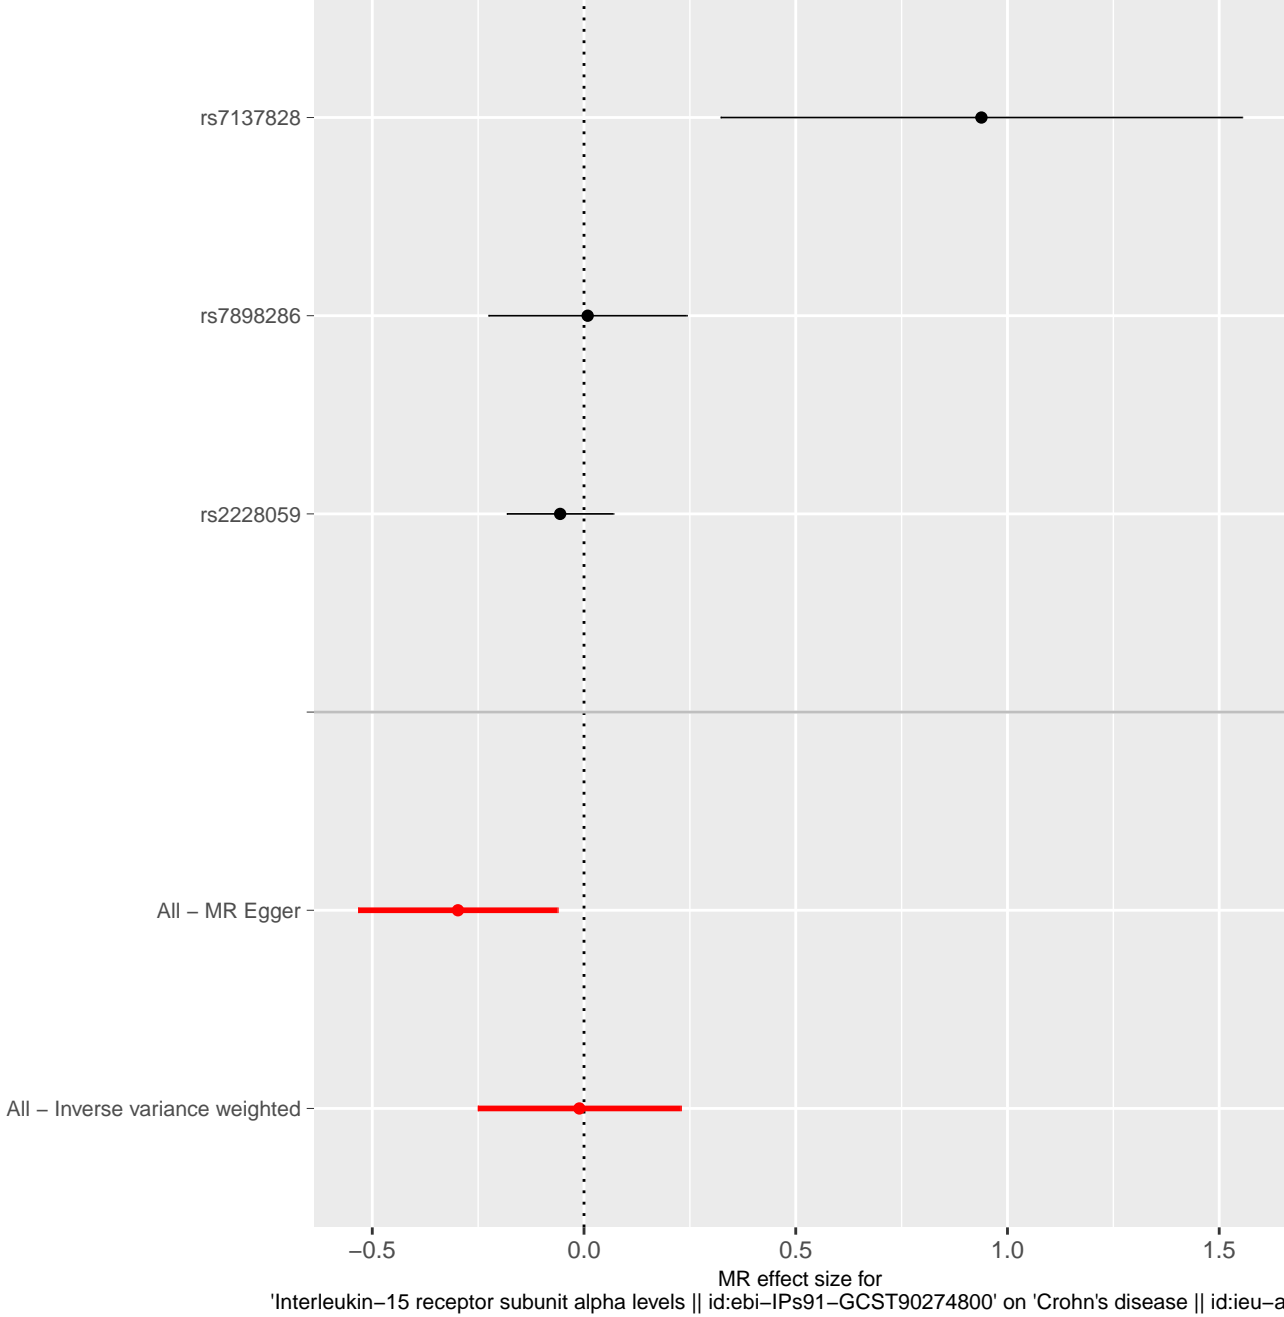

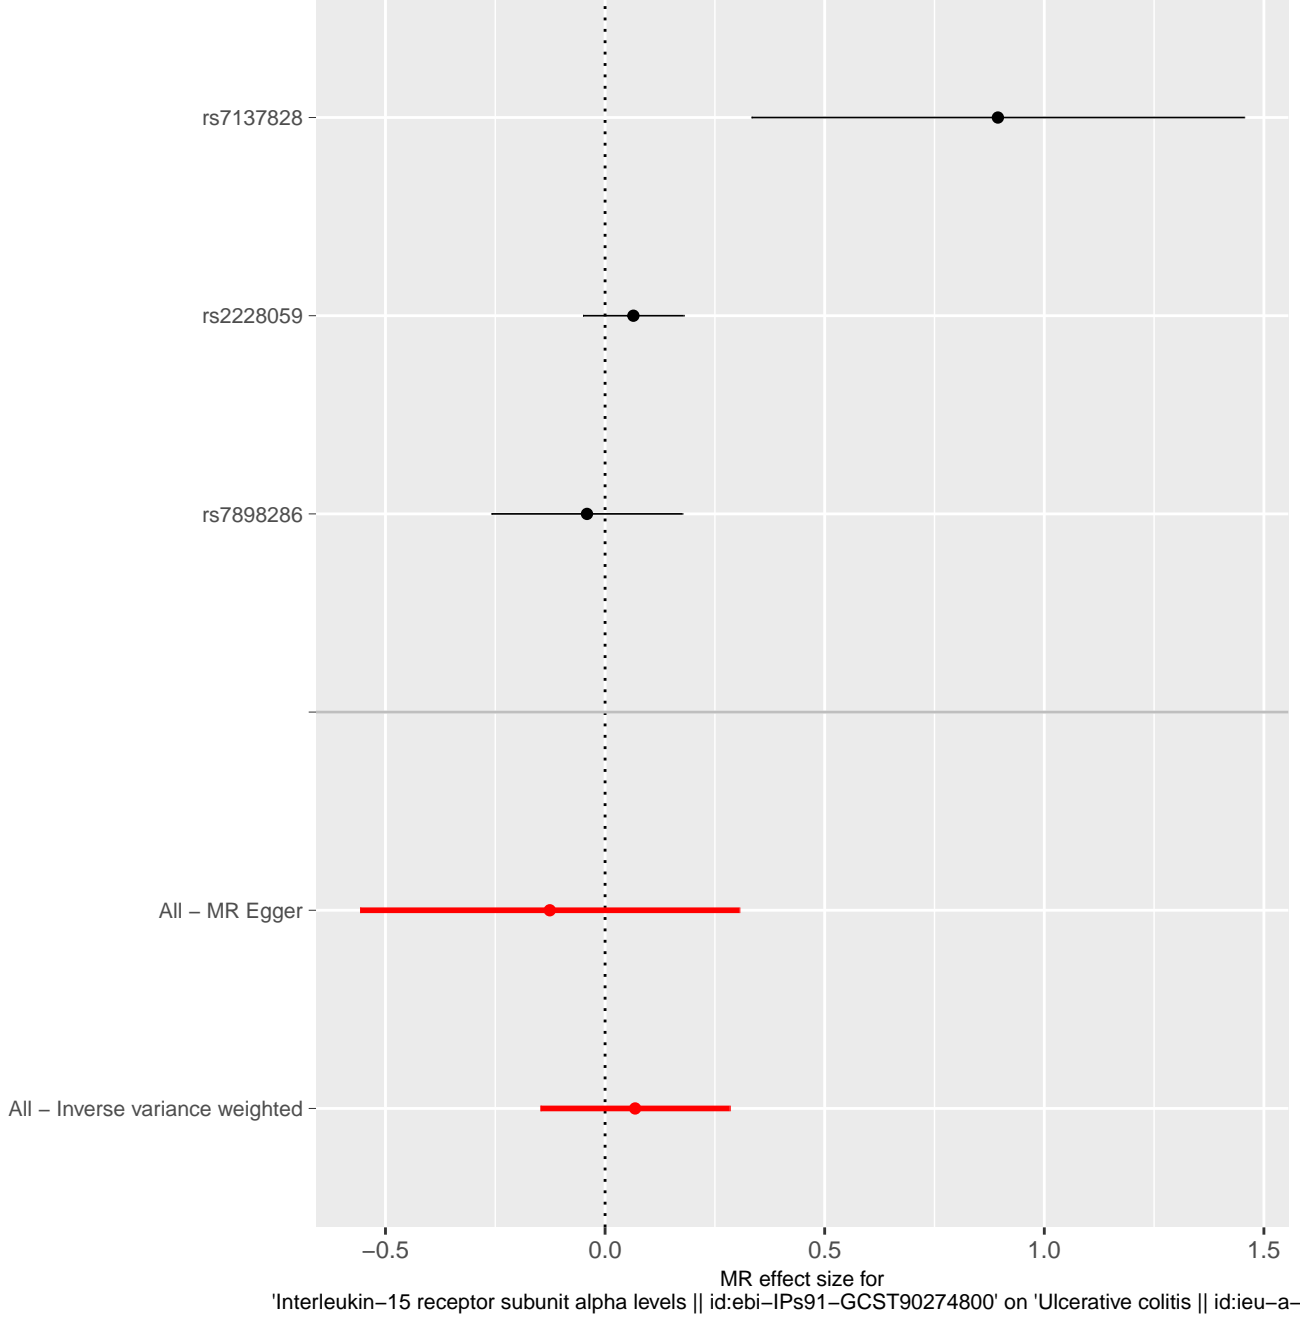

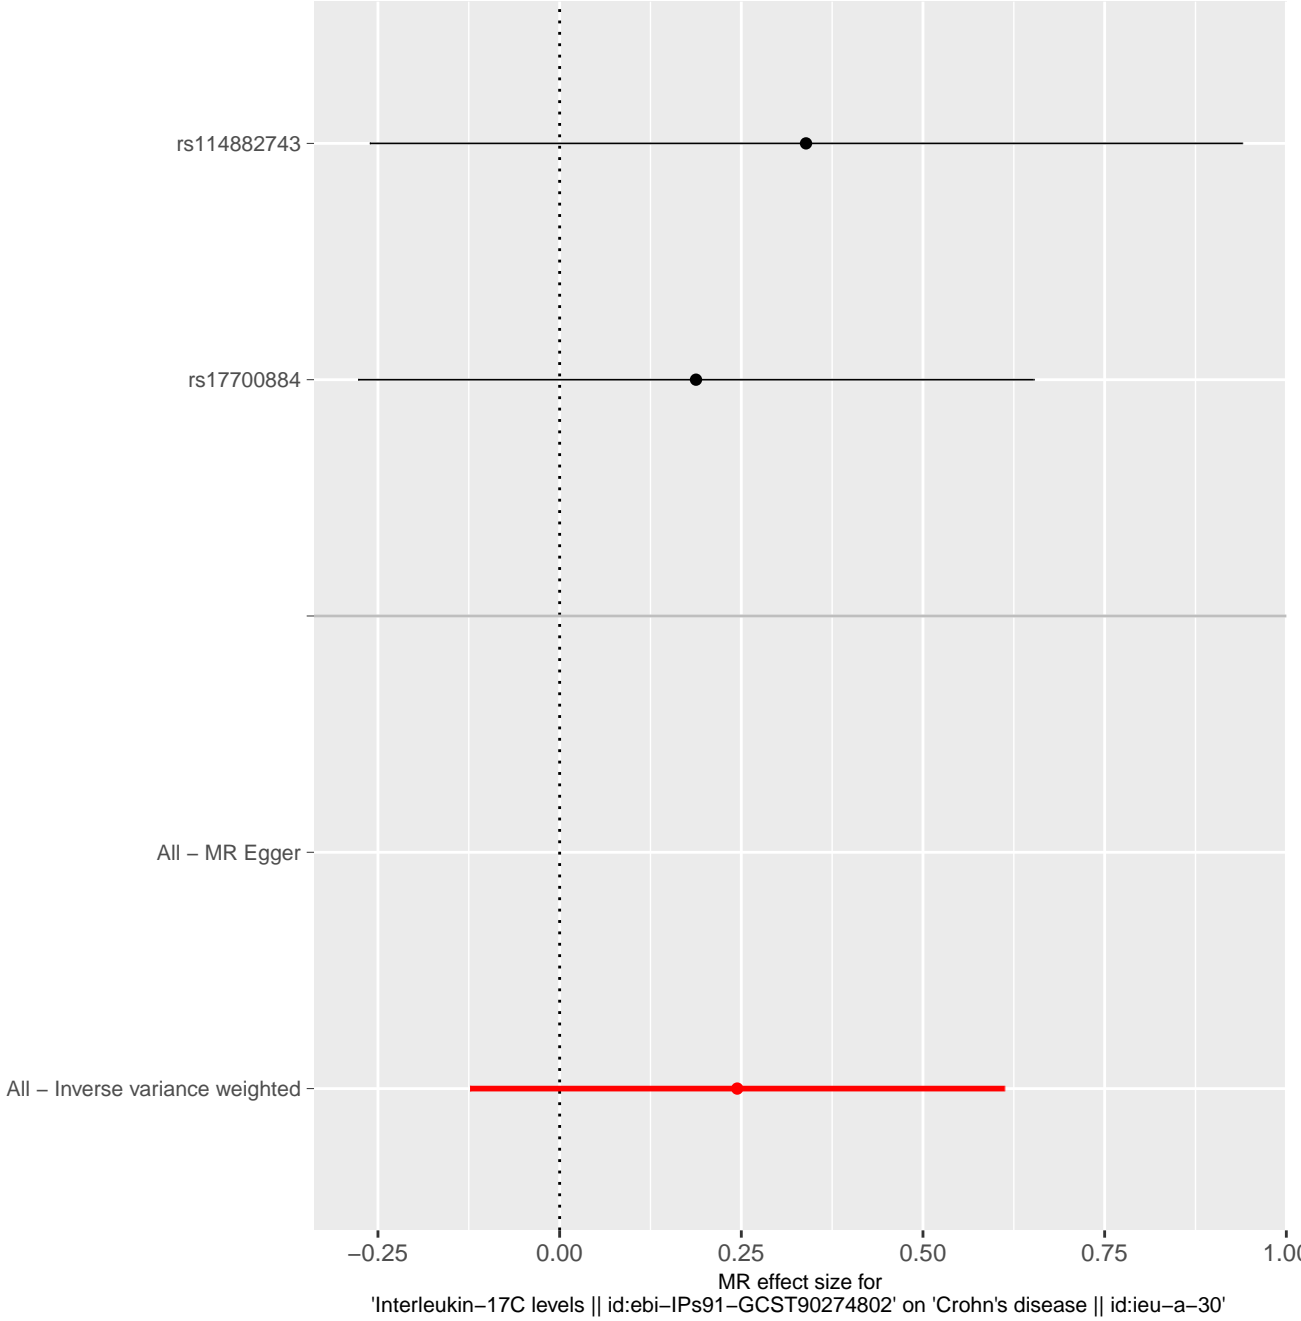



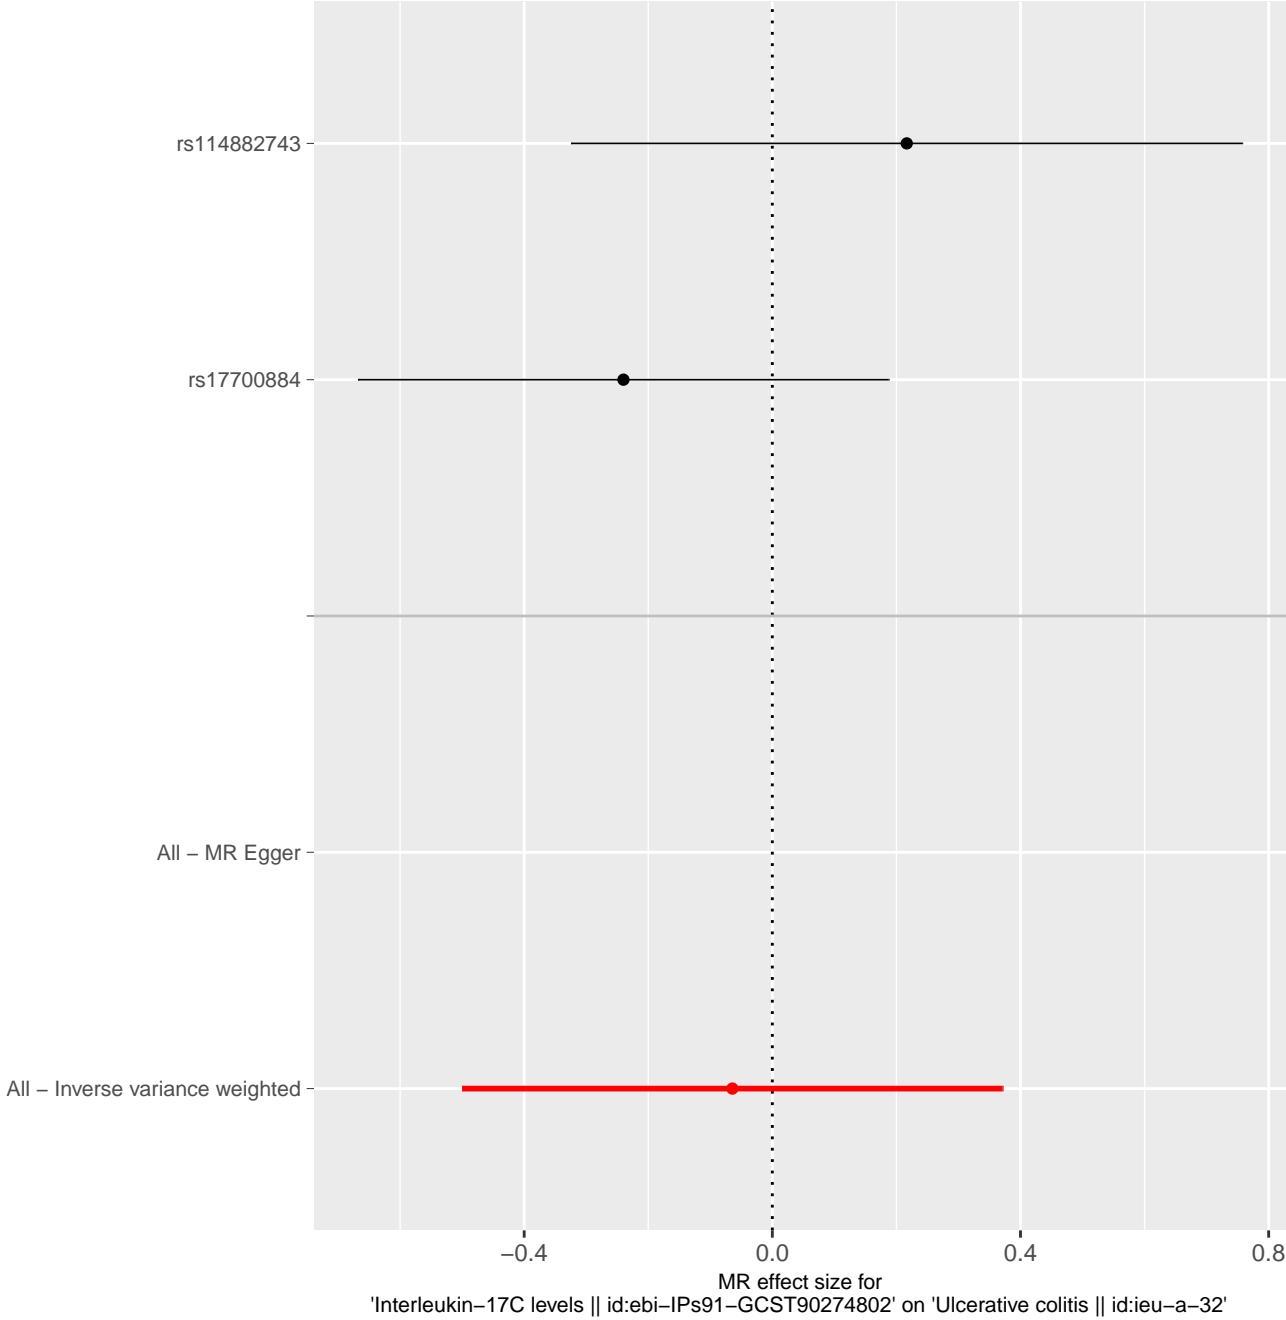

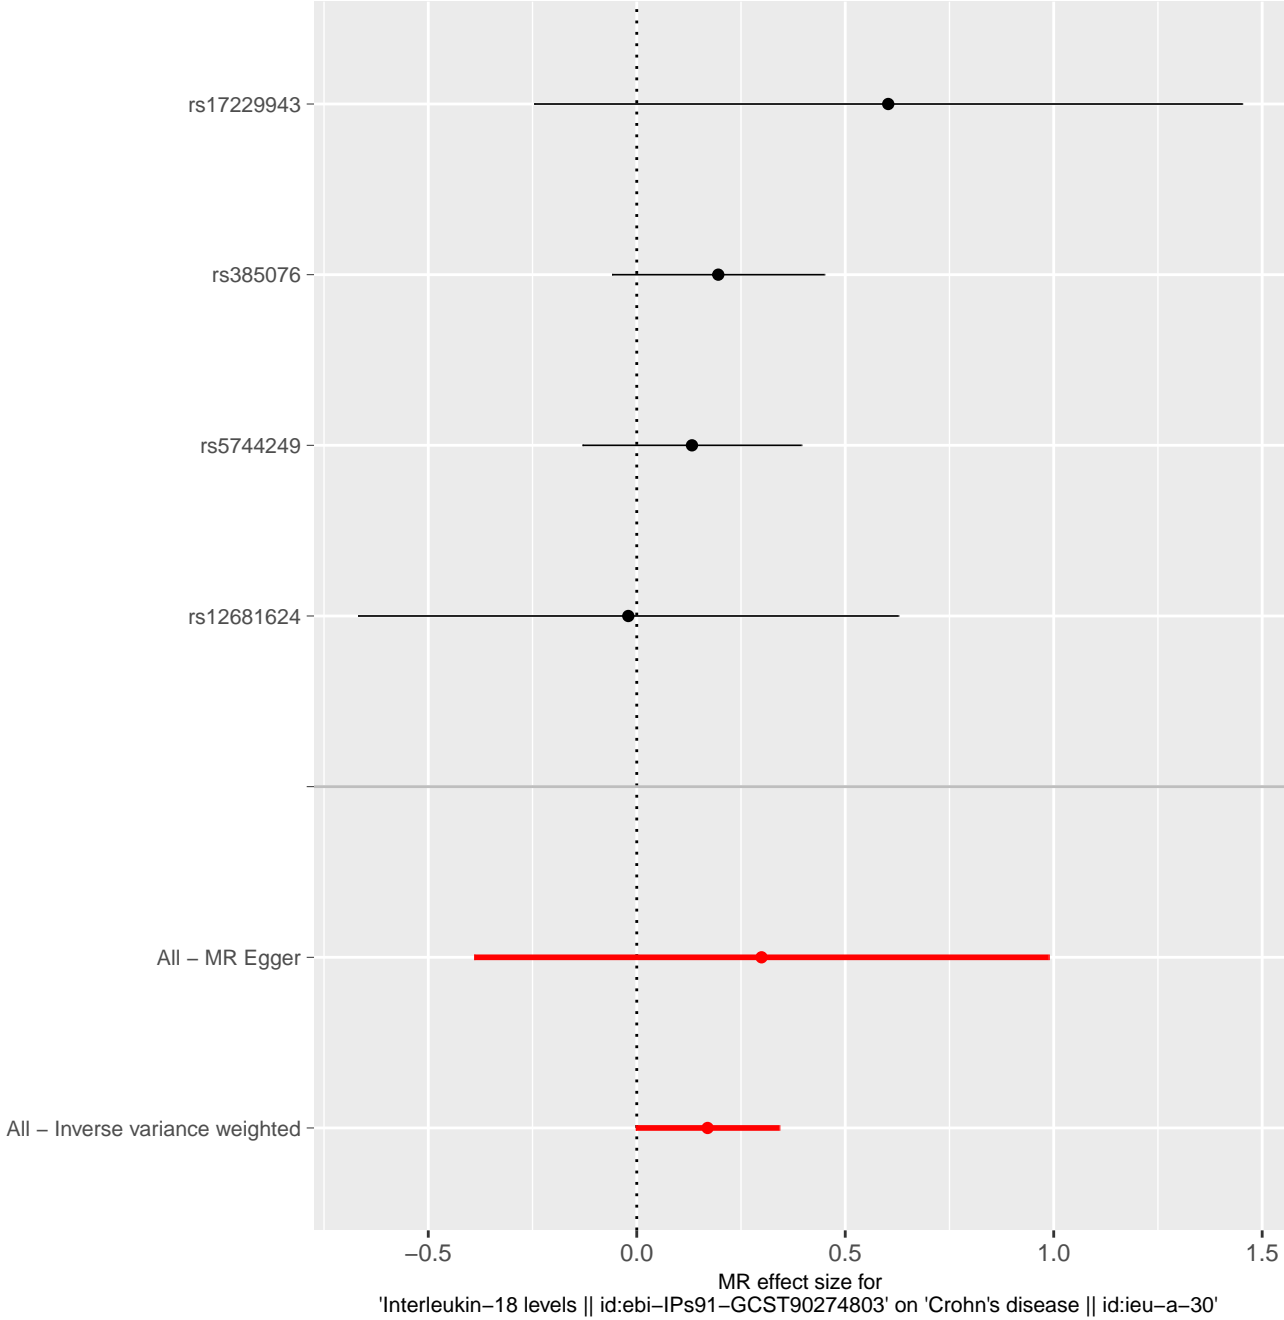

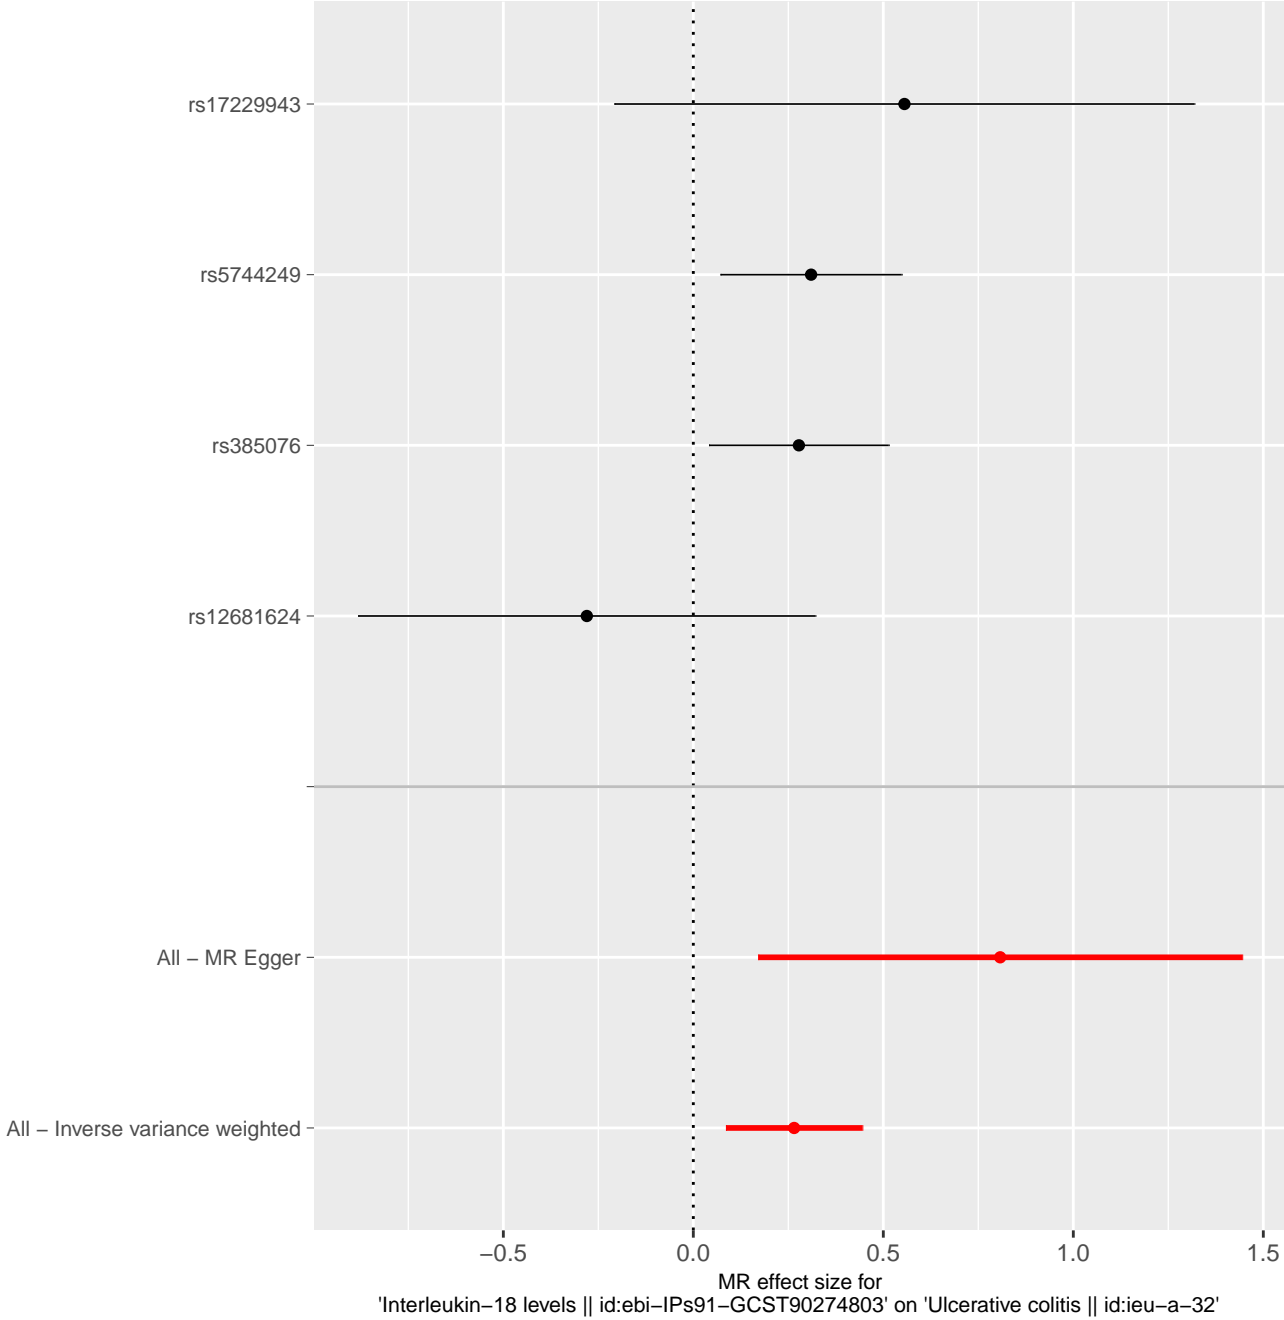

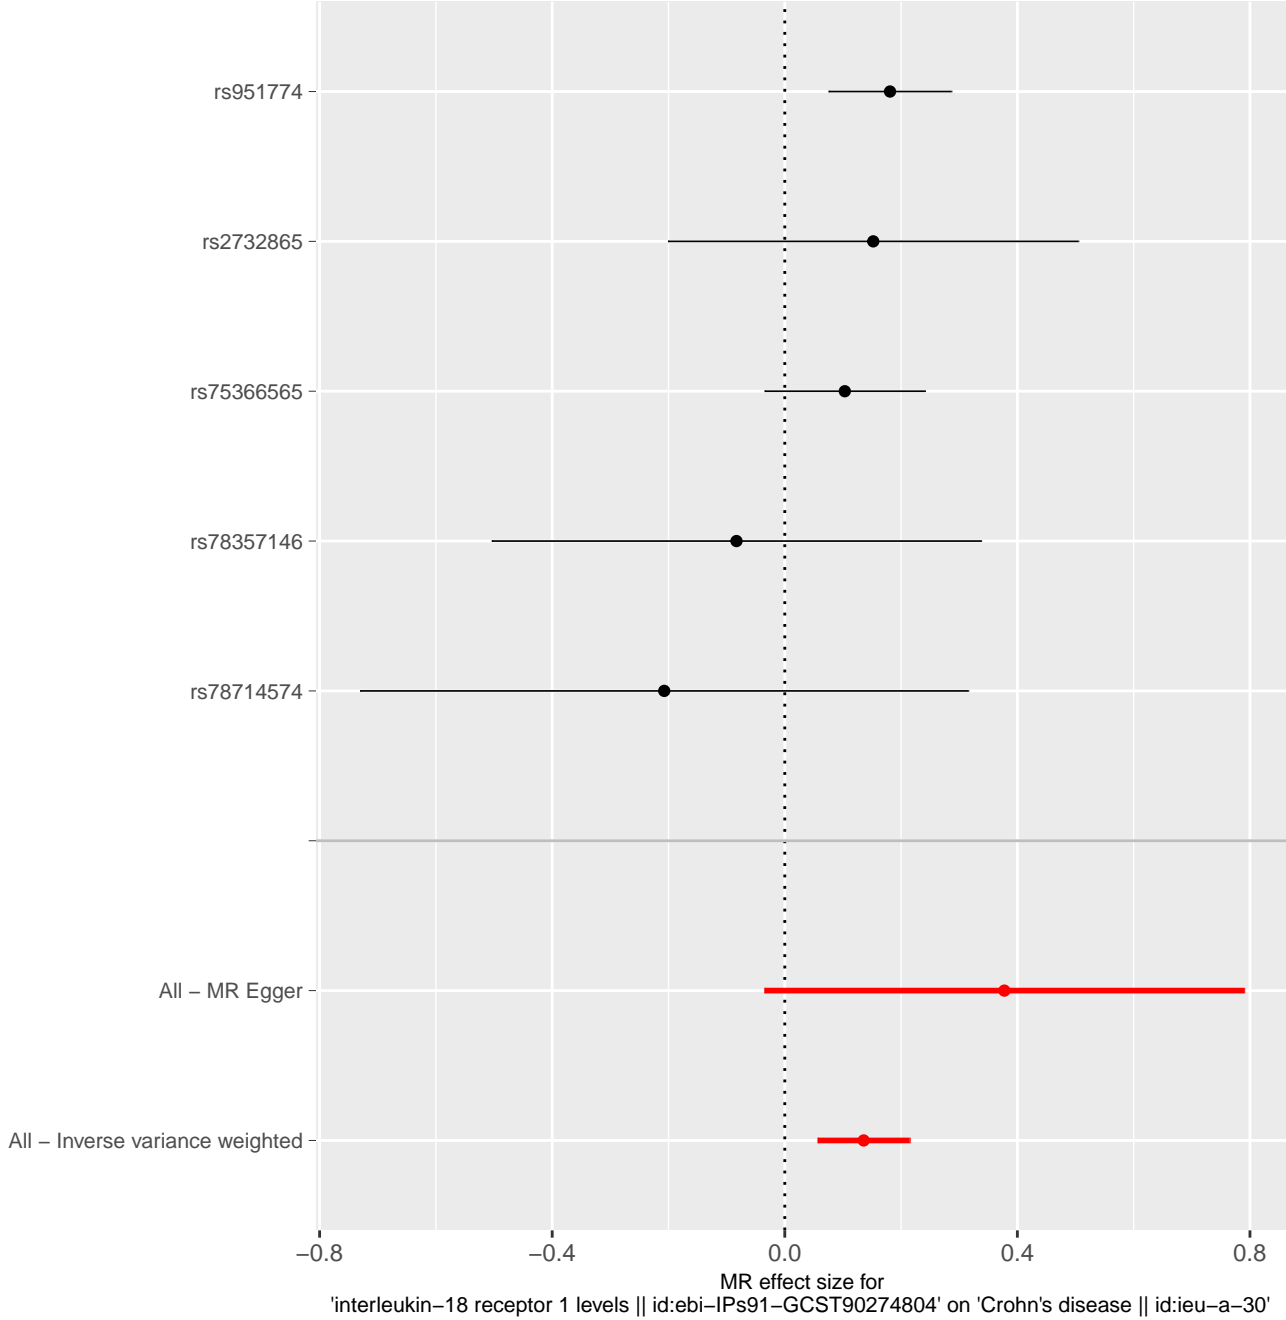

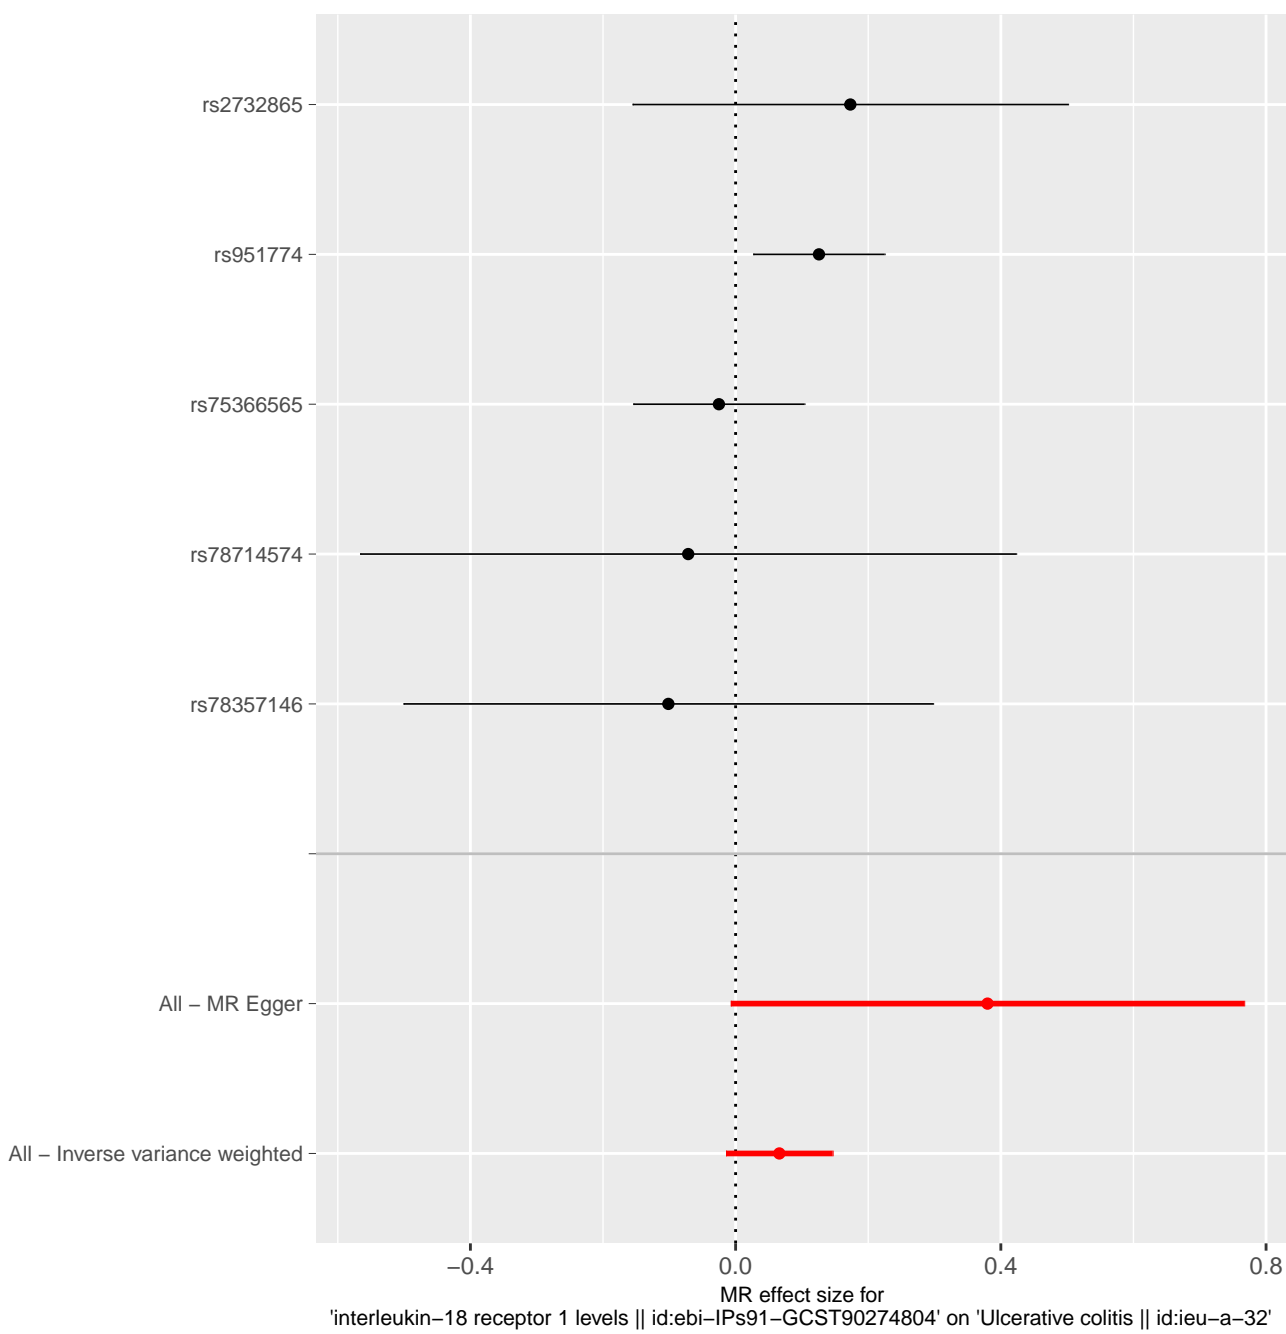

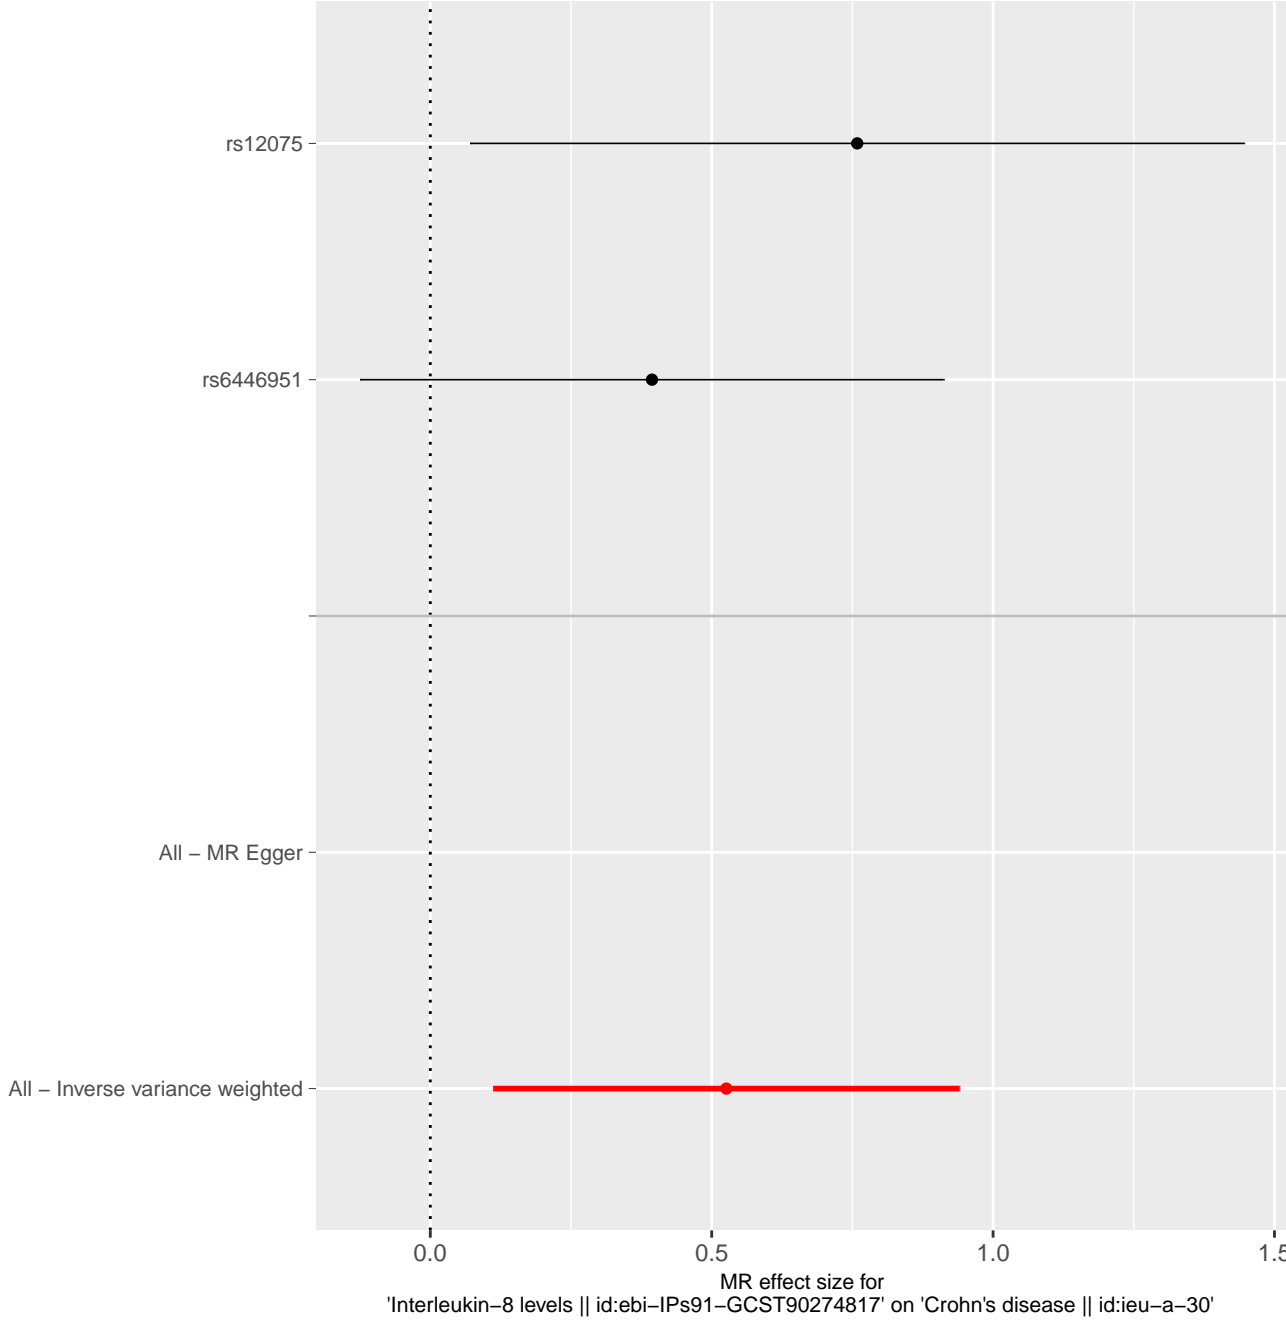

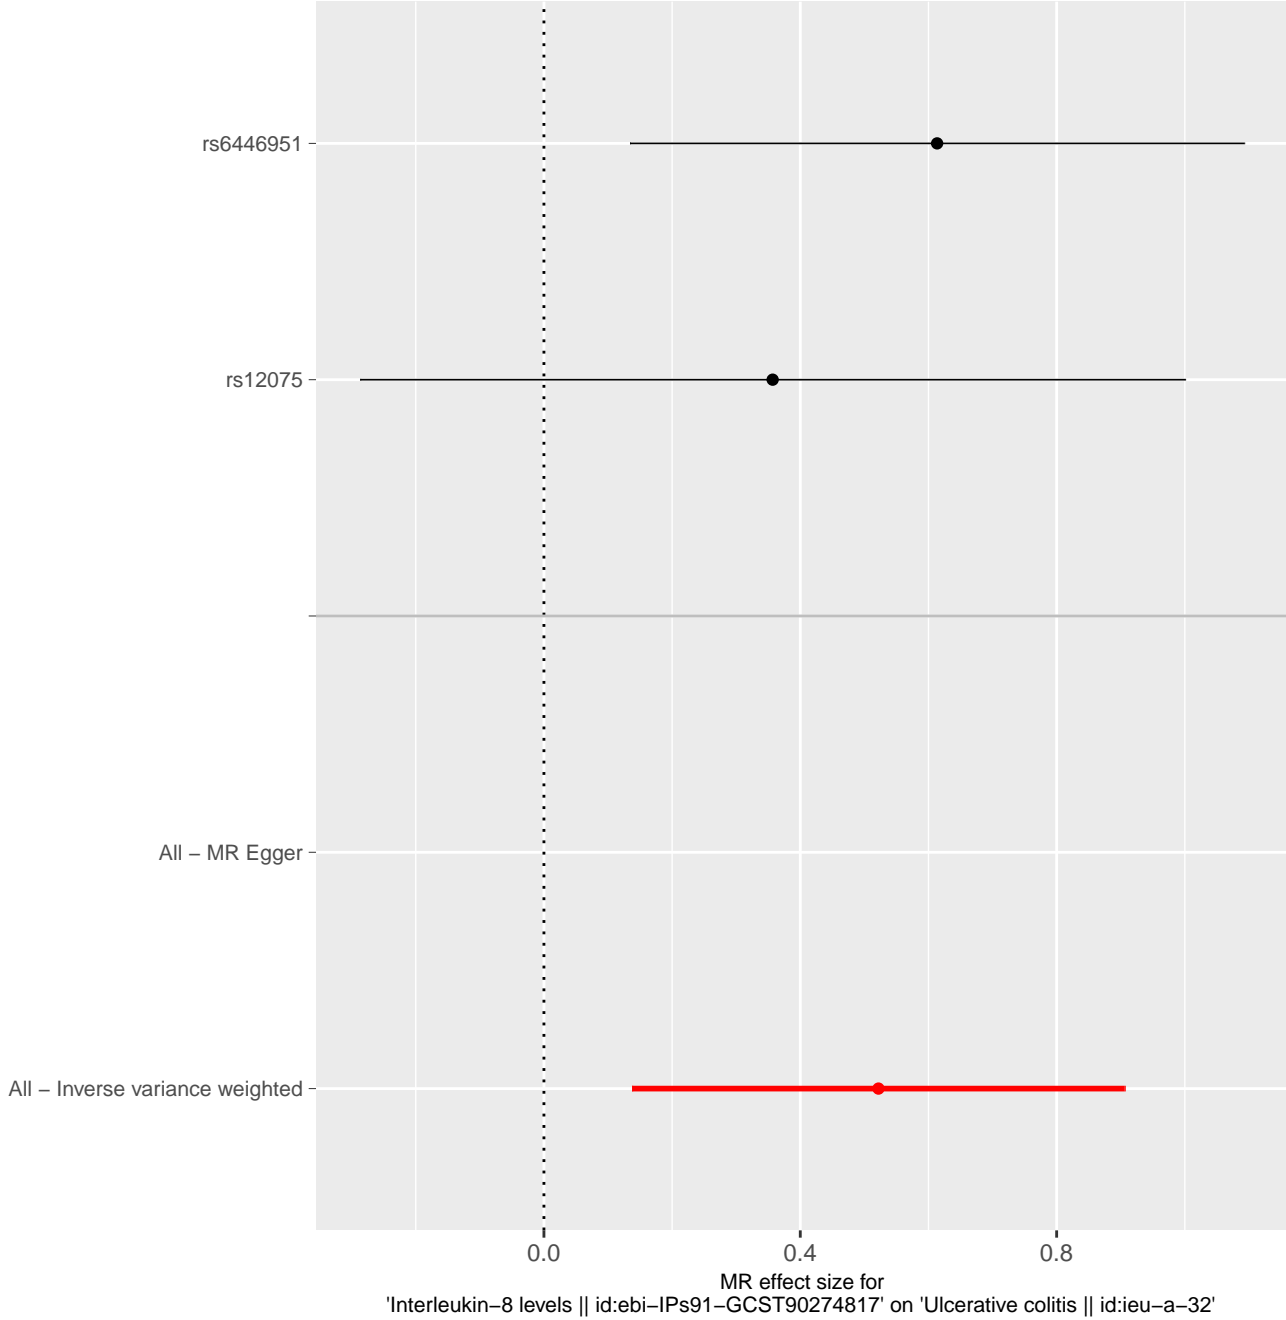

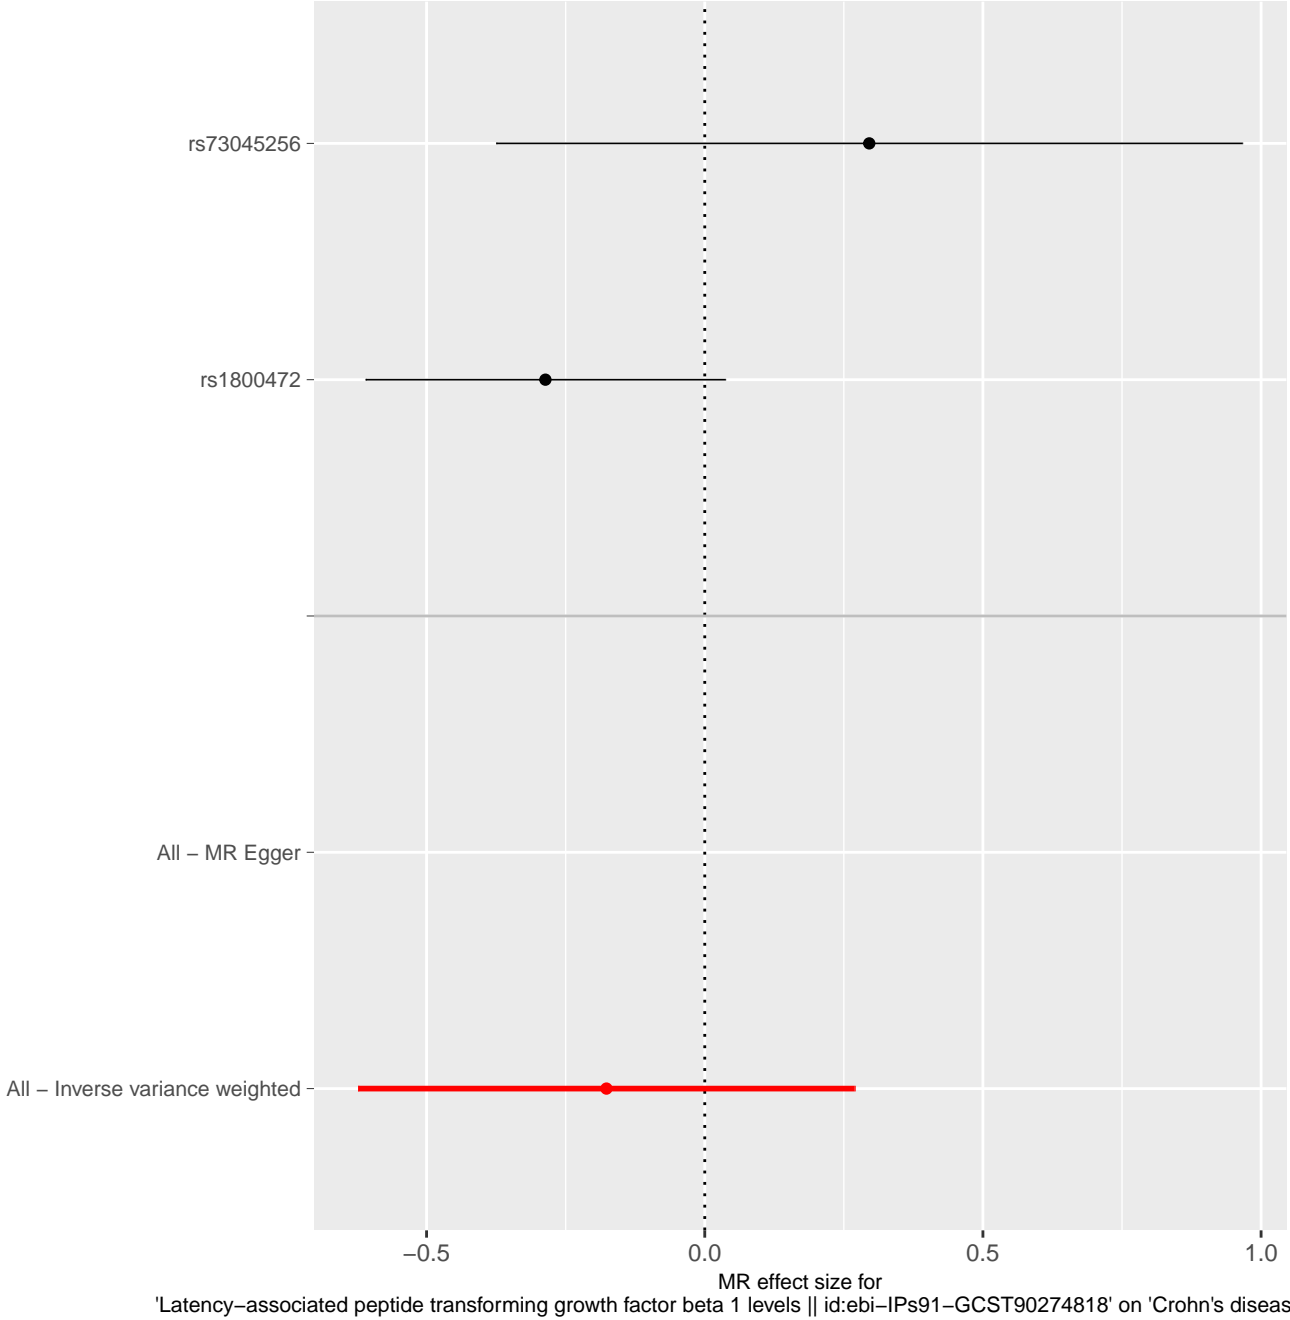



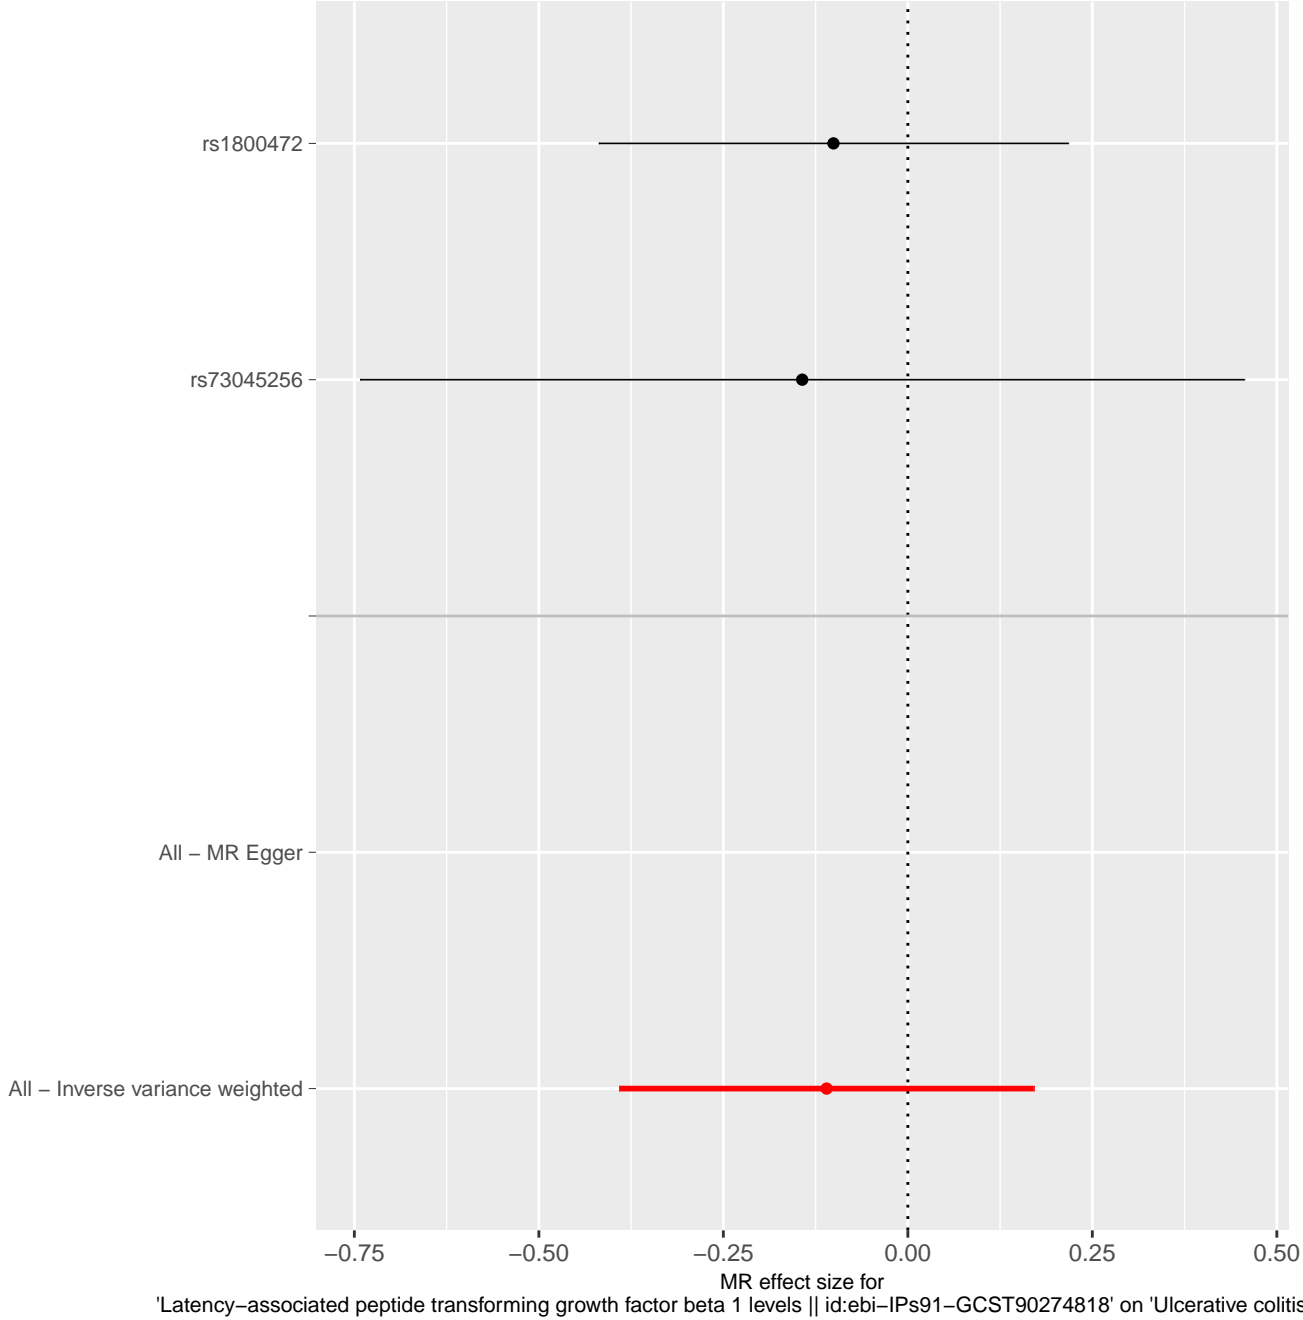

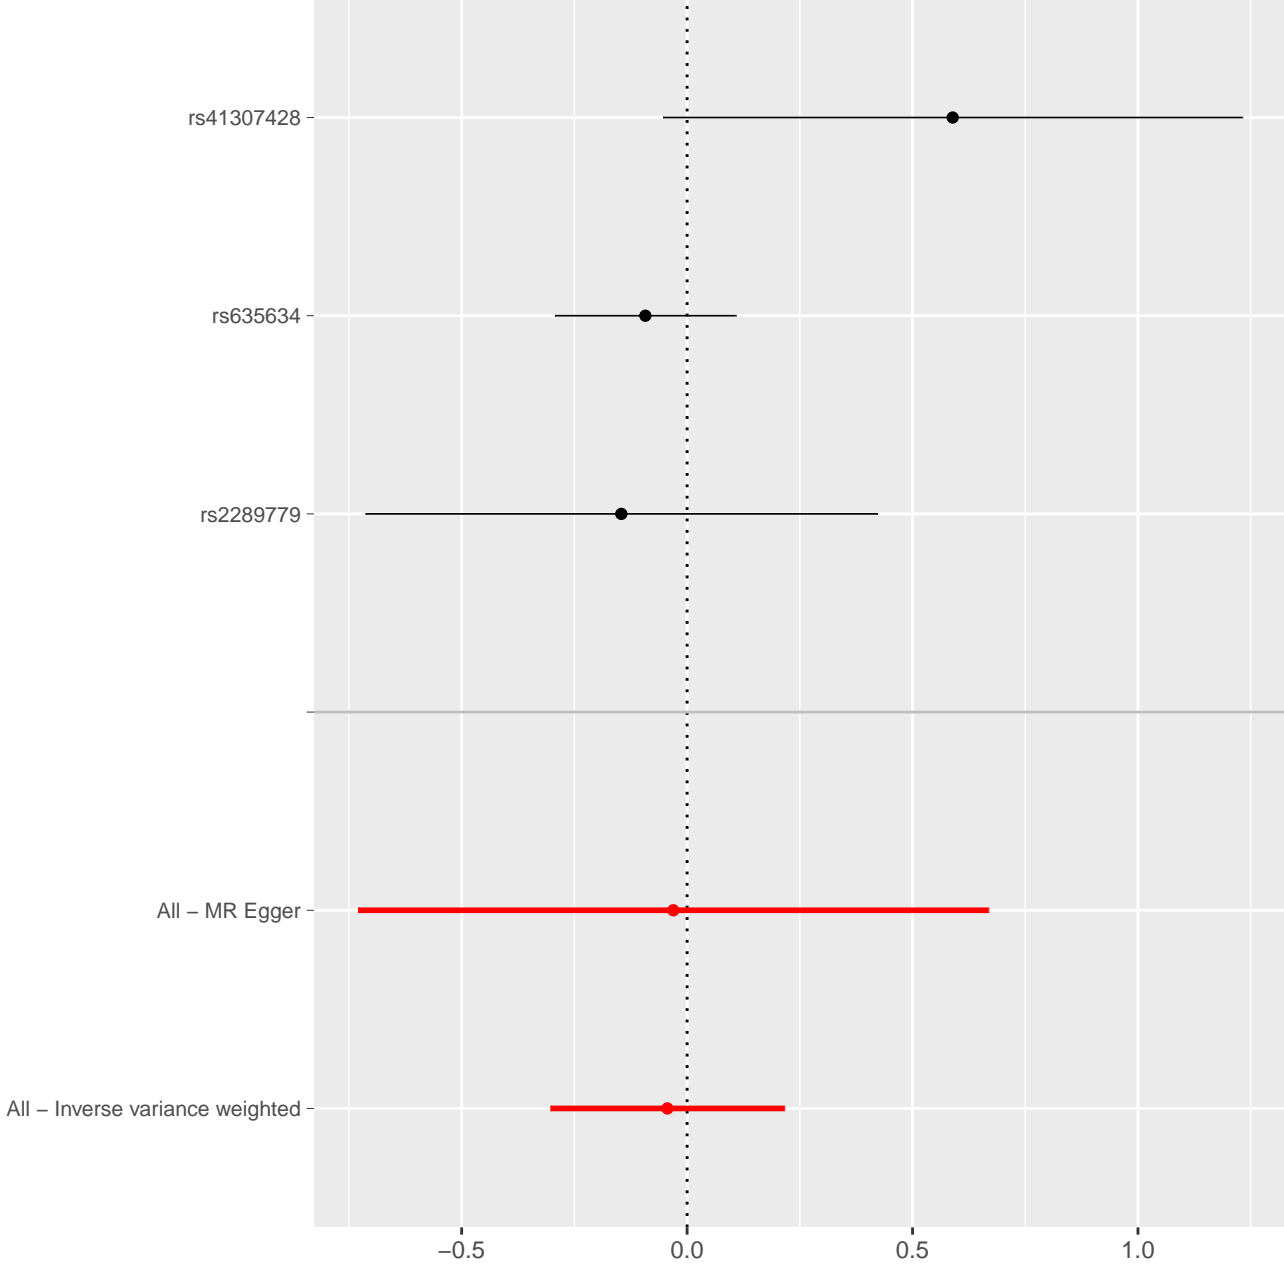

MR effect size for  
'Leukemia inhibitory factor receptor levels || id:ebi-IPs91-GCST90274820' on 'Crohn's disease || id:ieu-a-3'

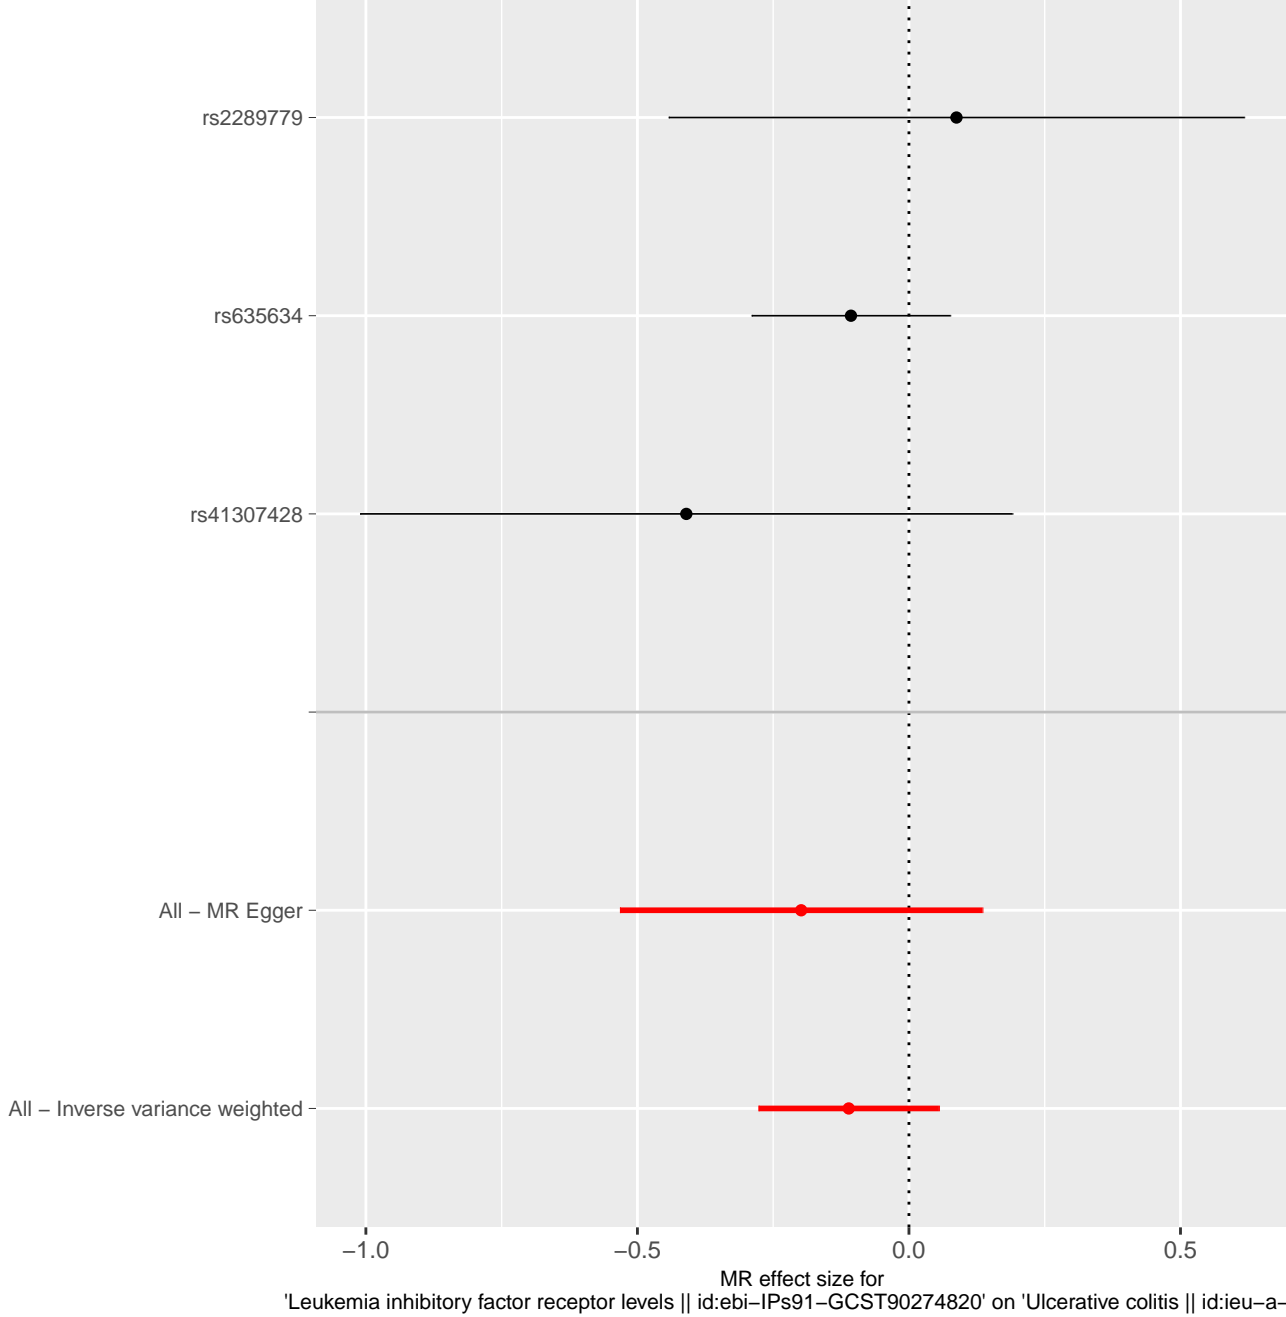

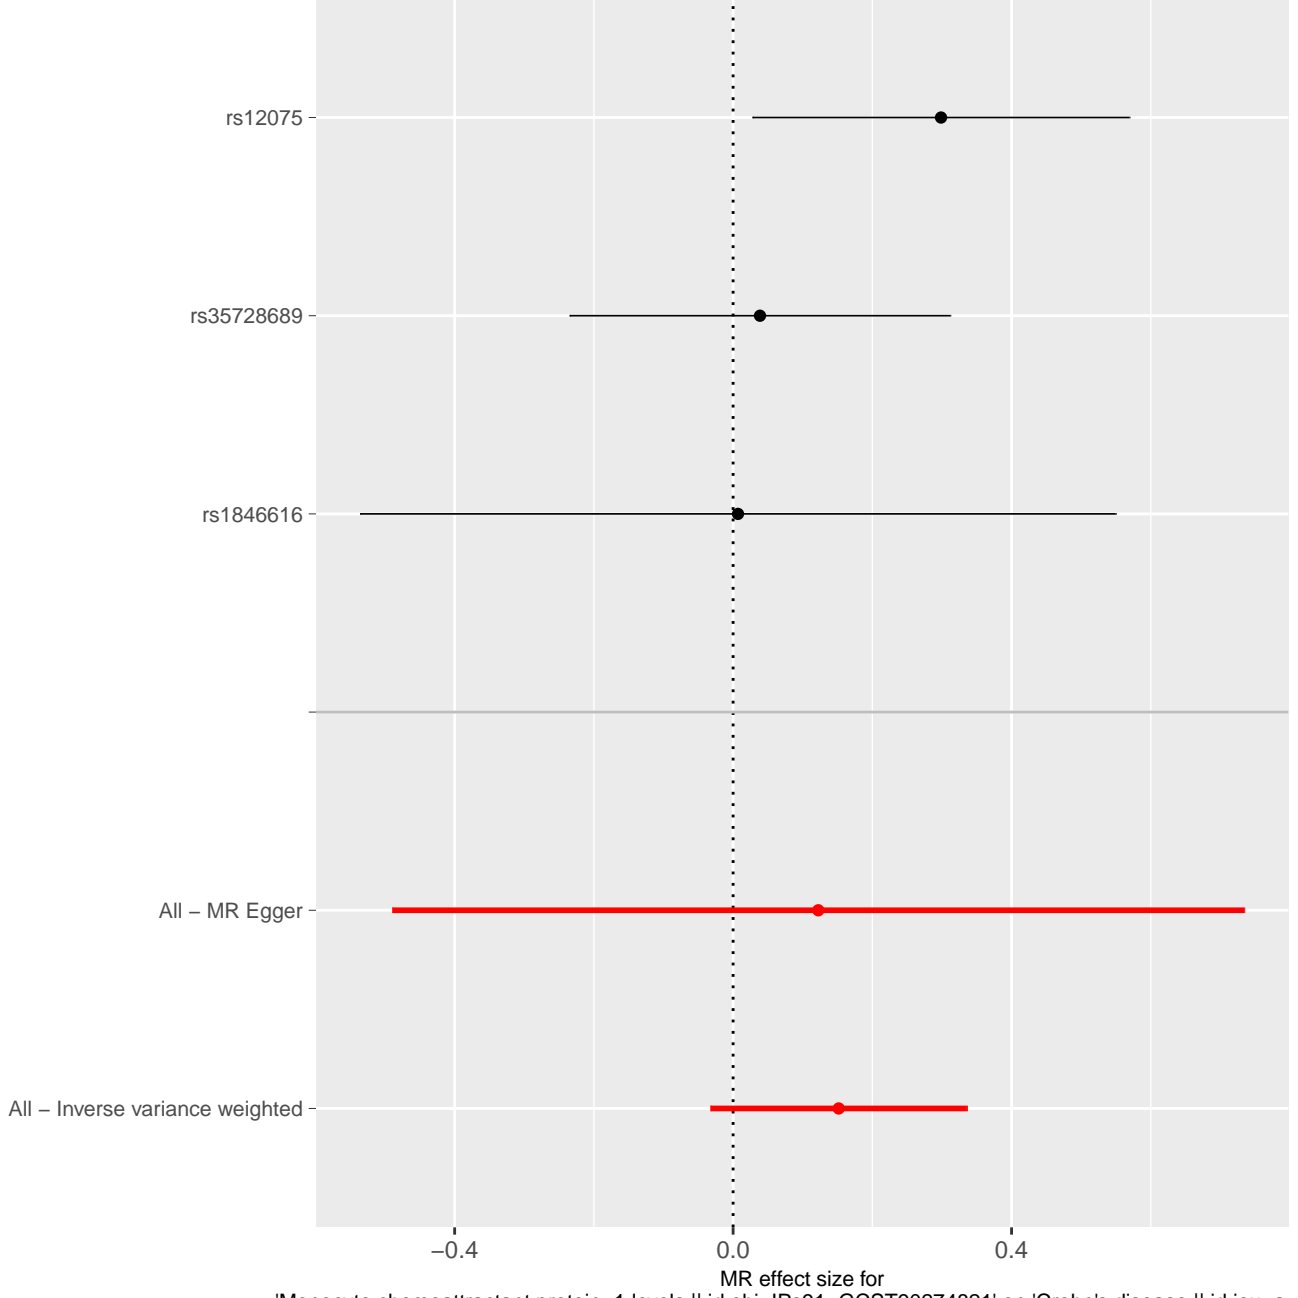

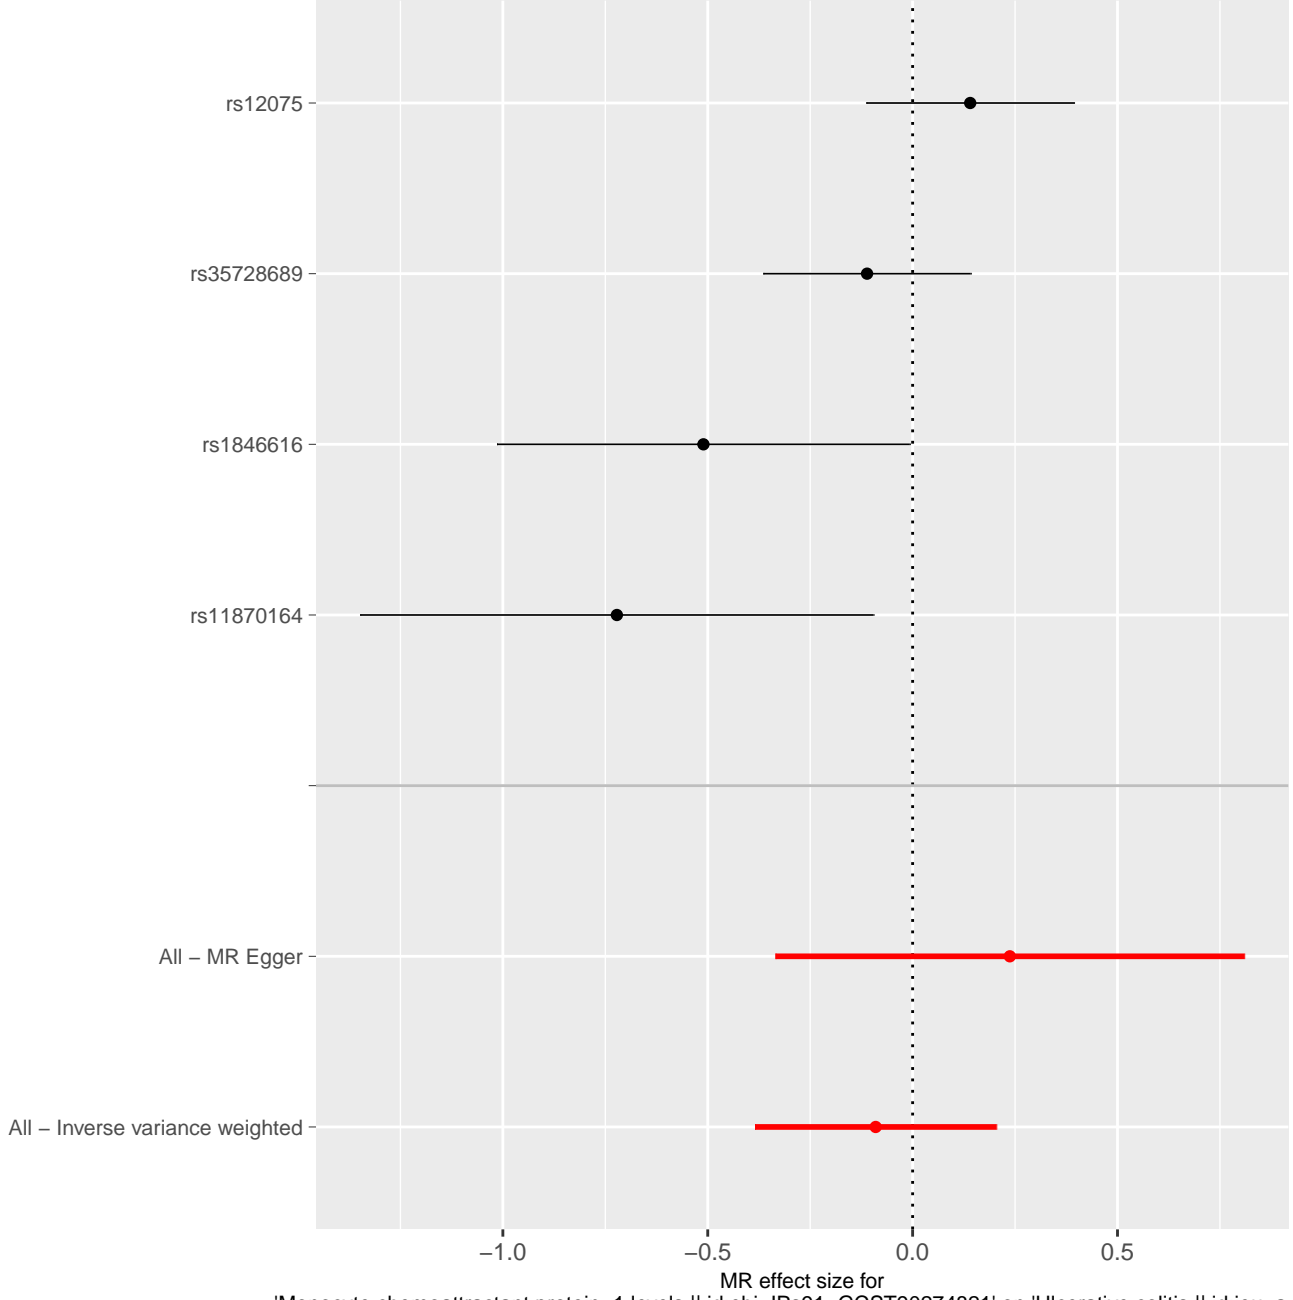

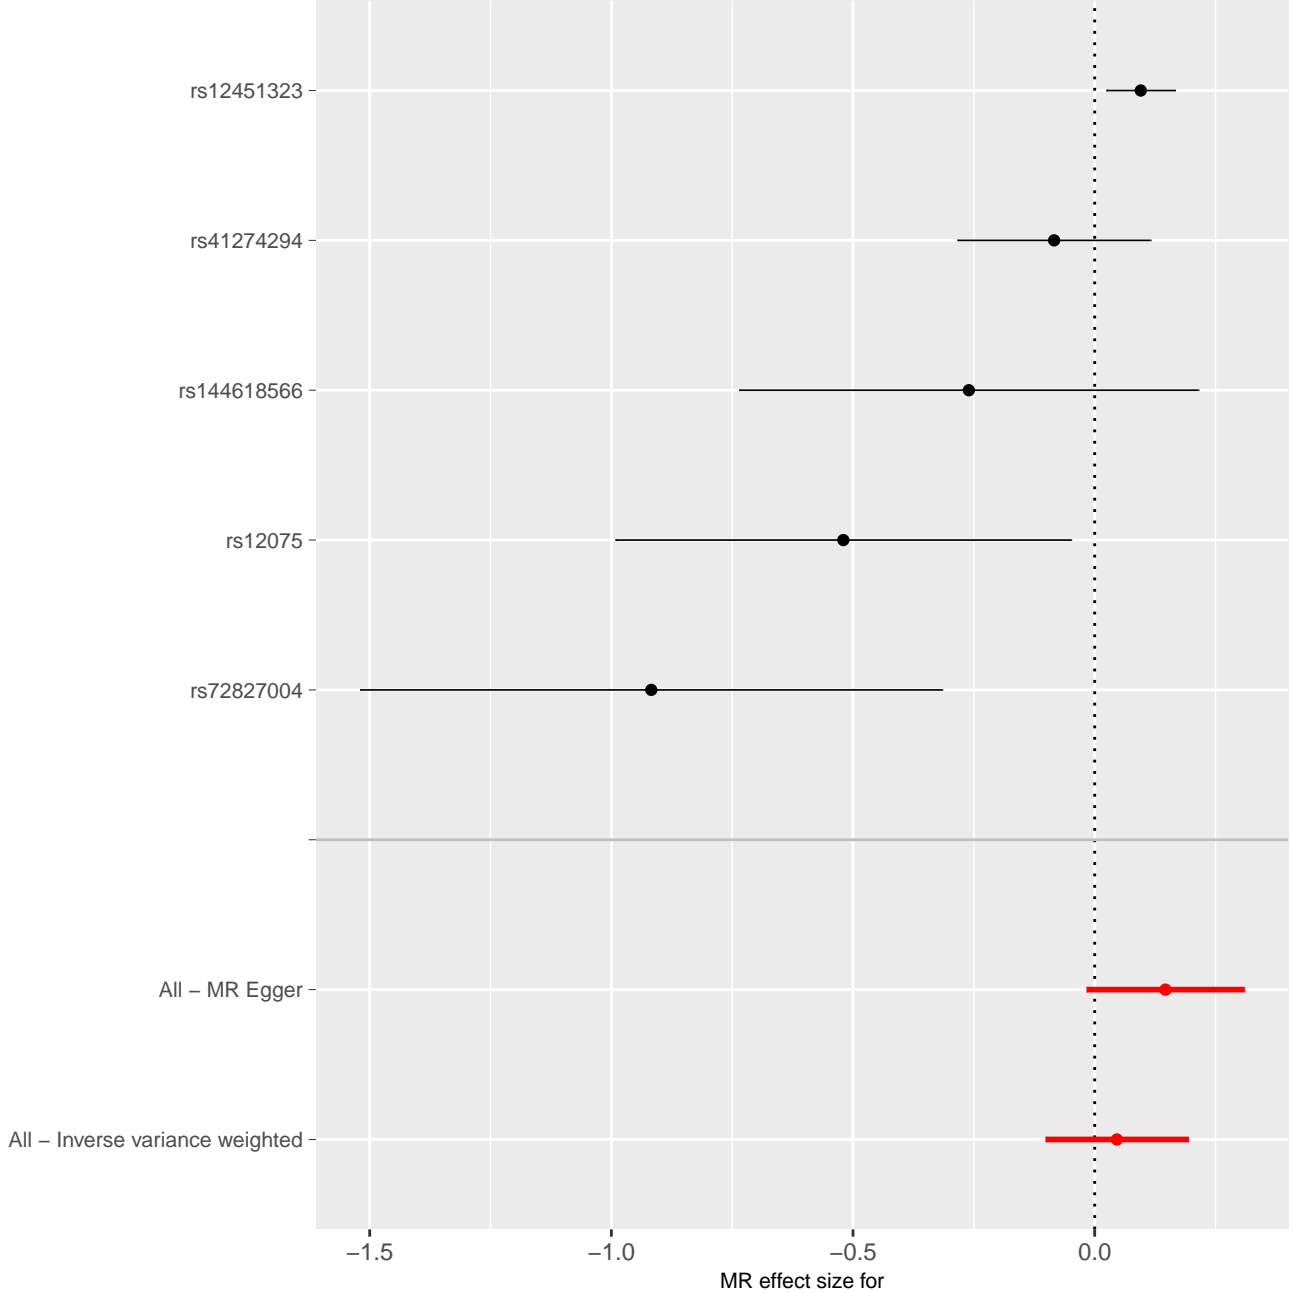

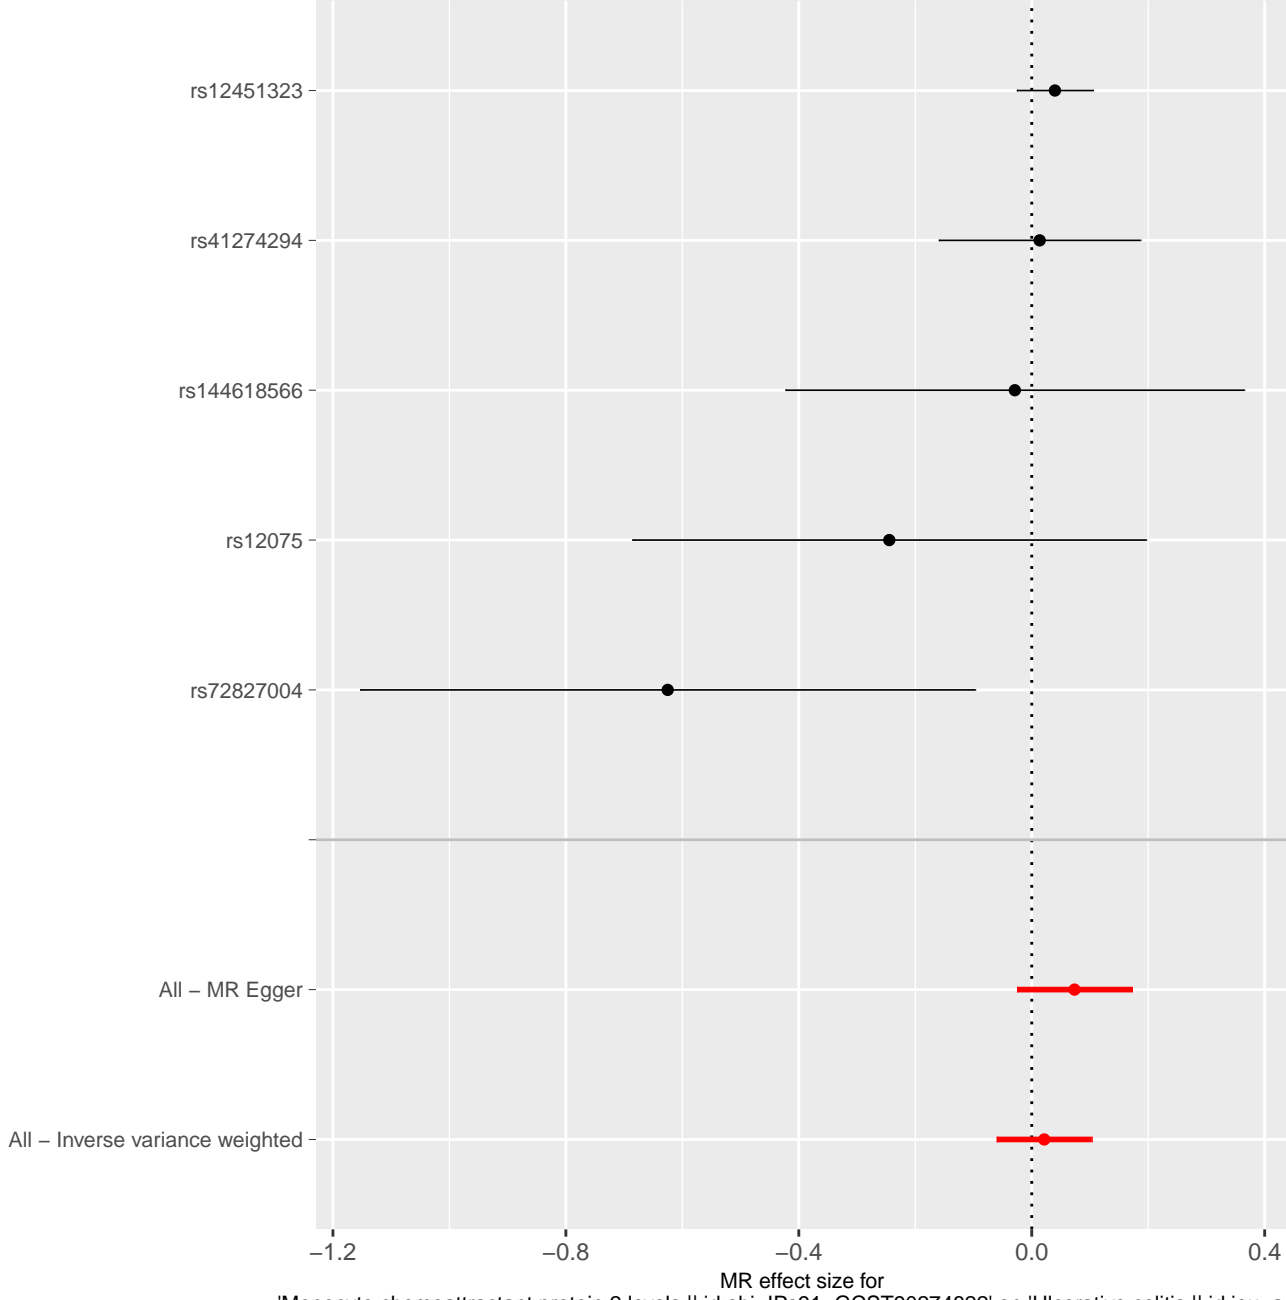

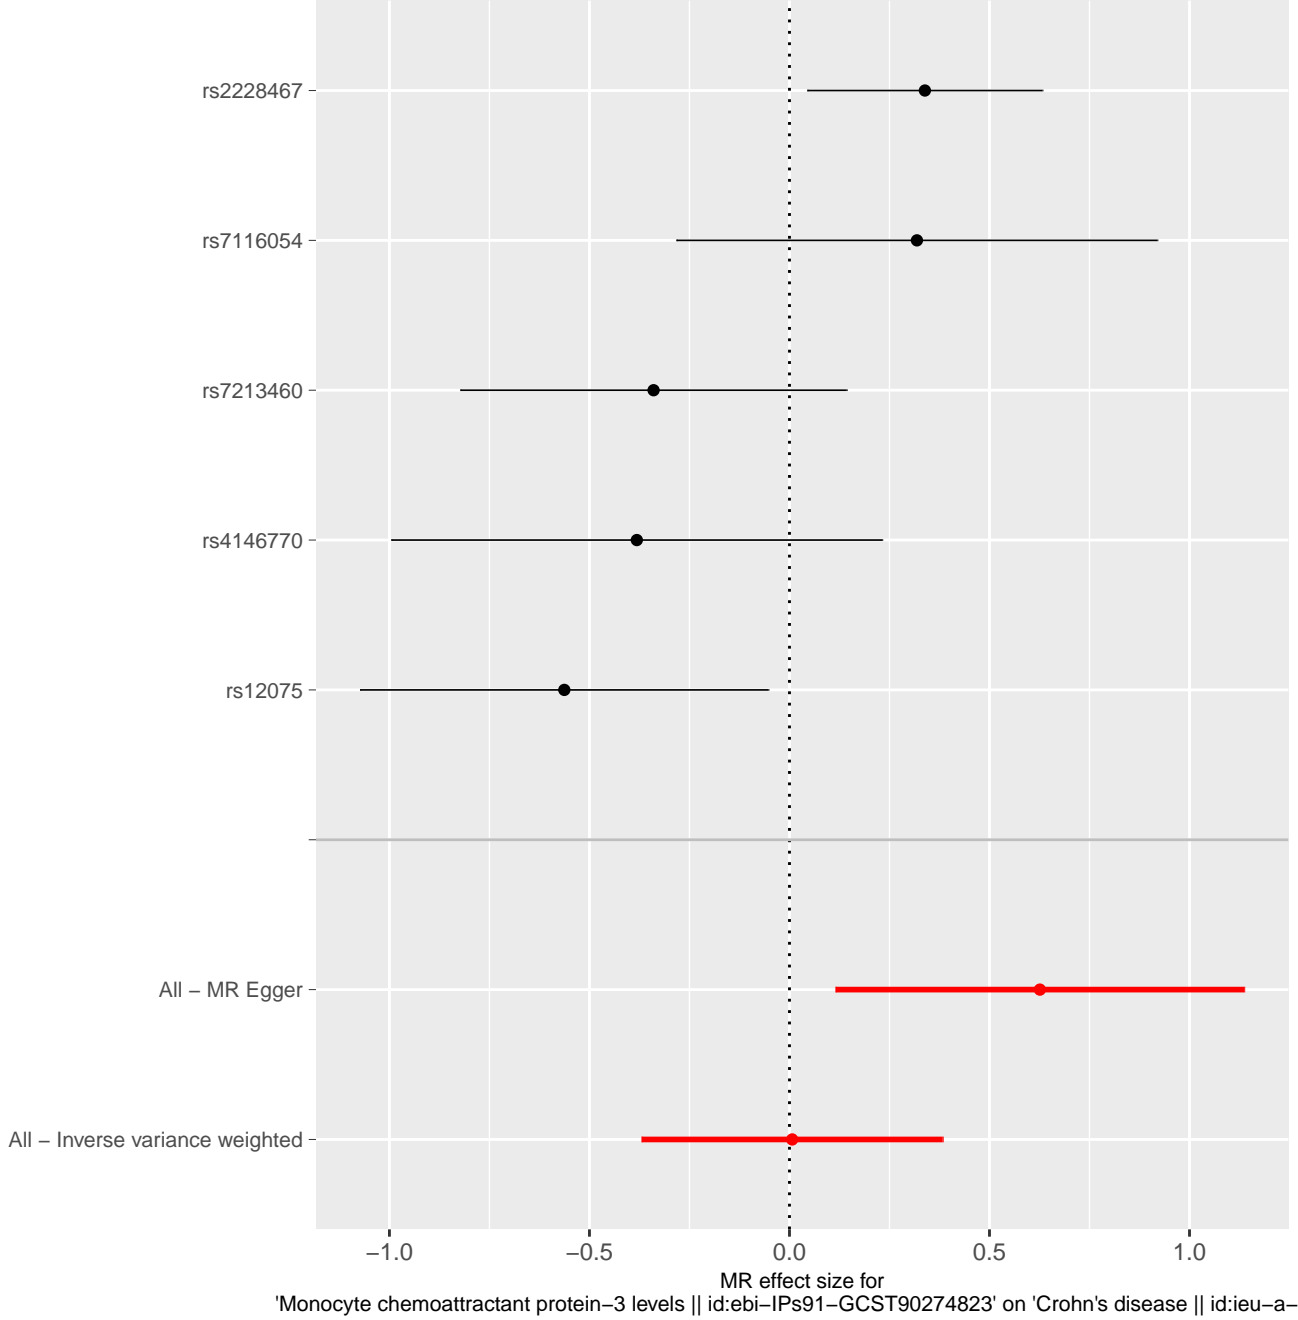



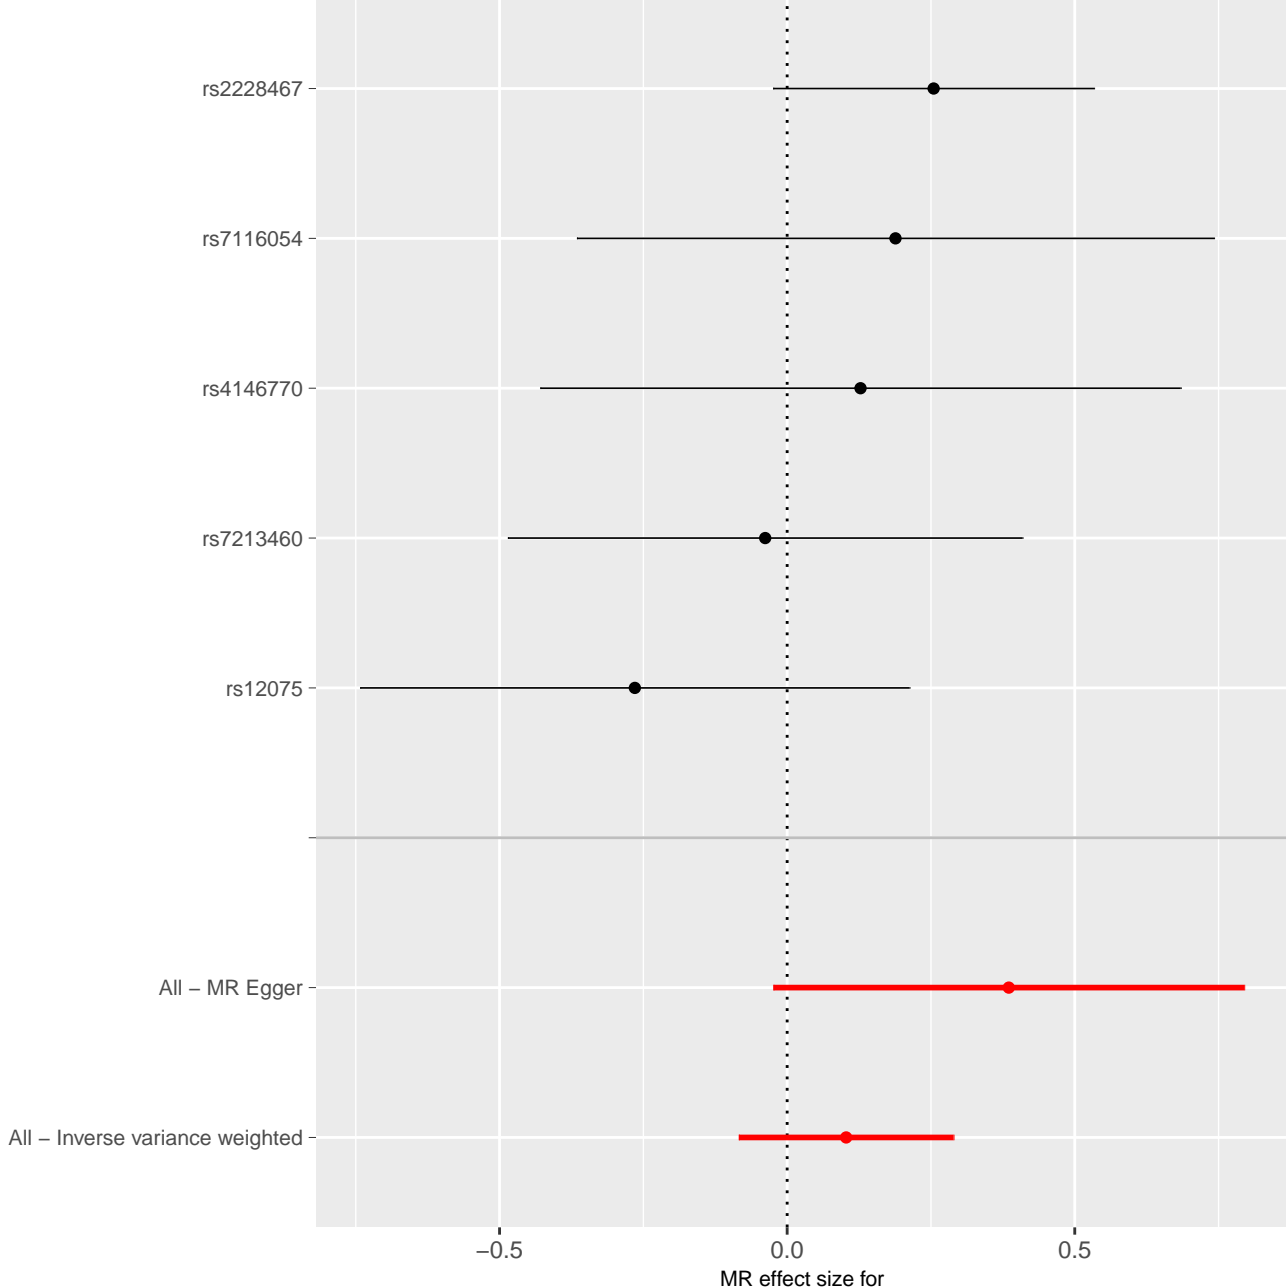

MR effect size for  
'Monocyte chemoattractant protein-3 levels || id:ebi-IPs91-GCST90274823' on 'Ulcerative colitis || id:ieu-a-3'

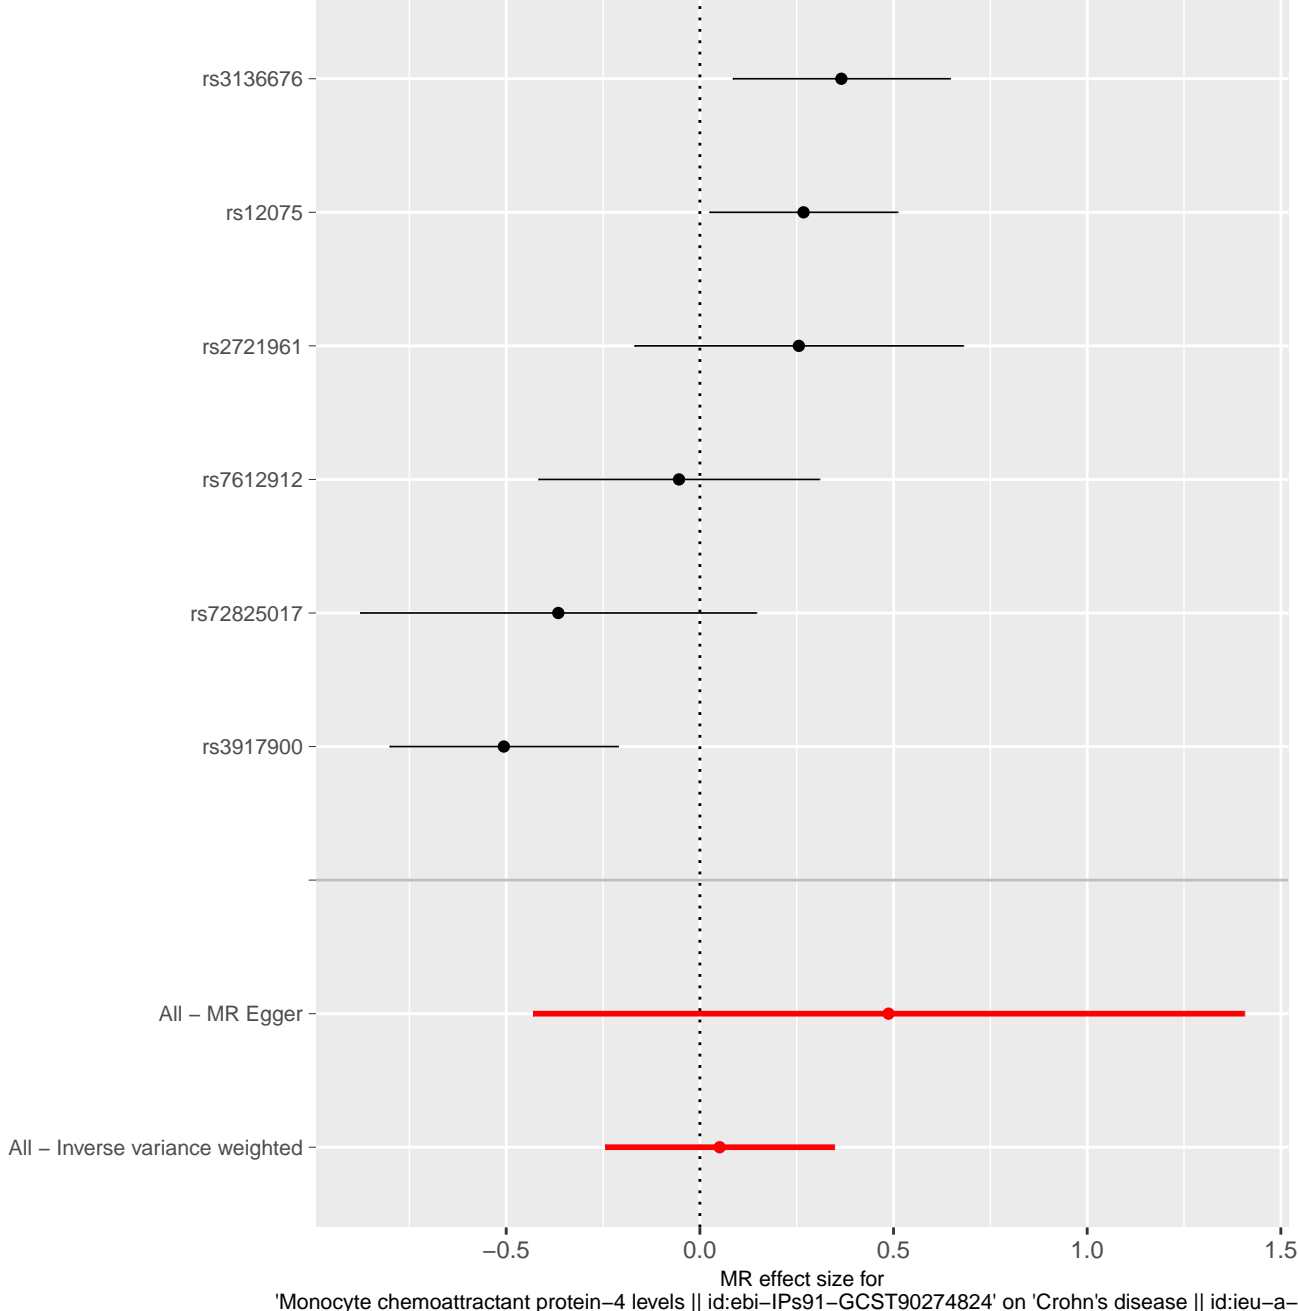

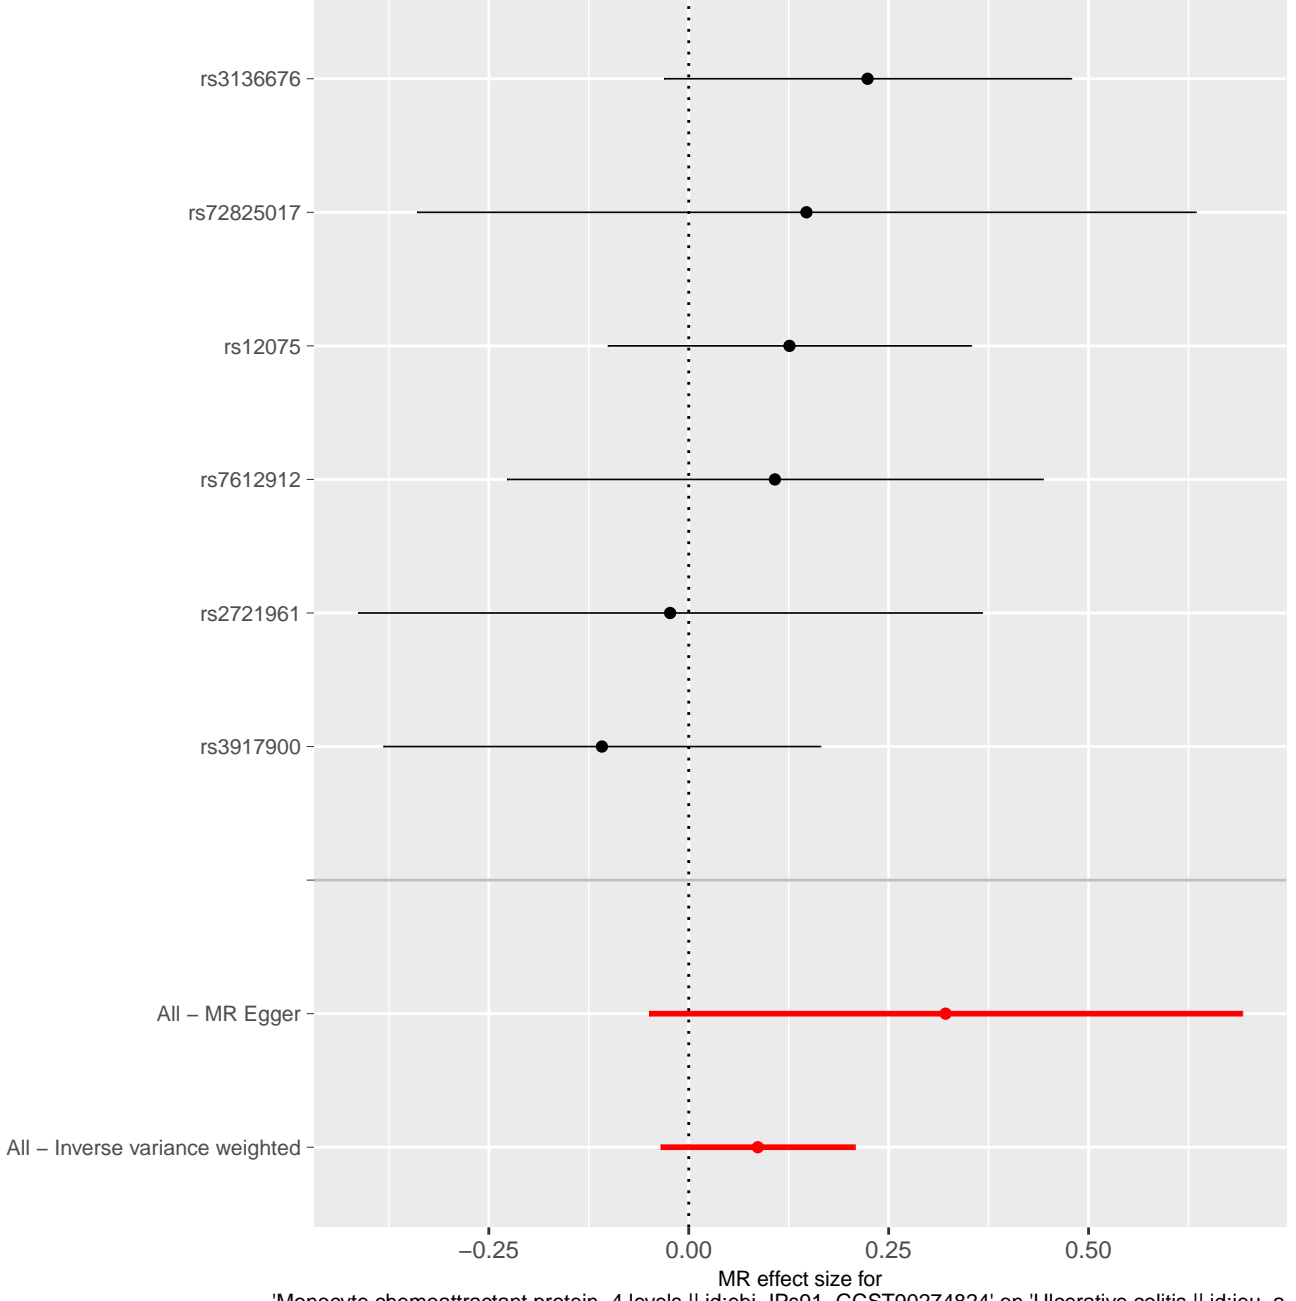

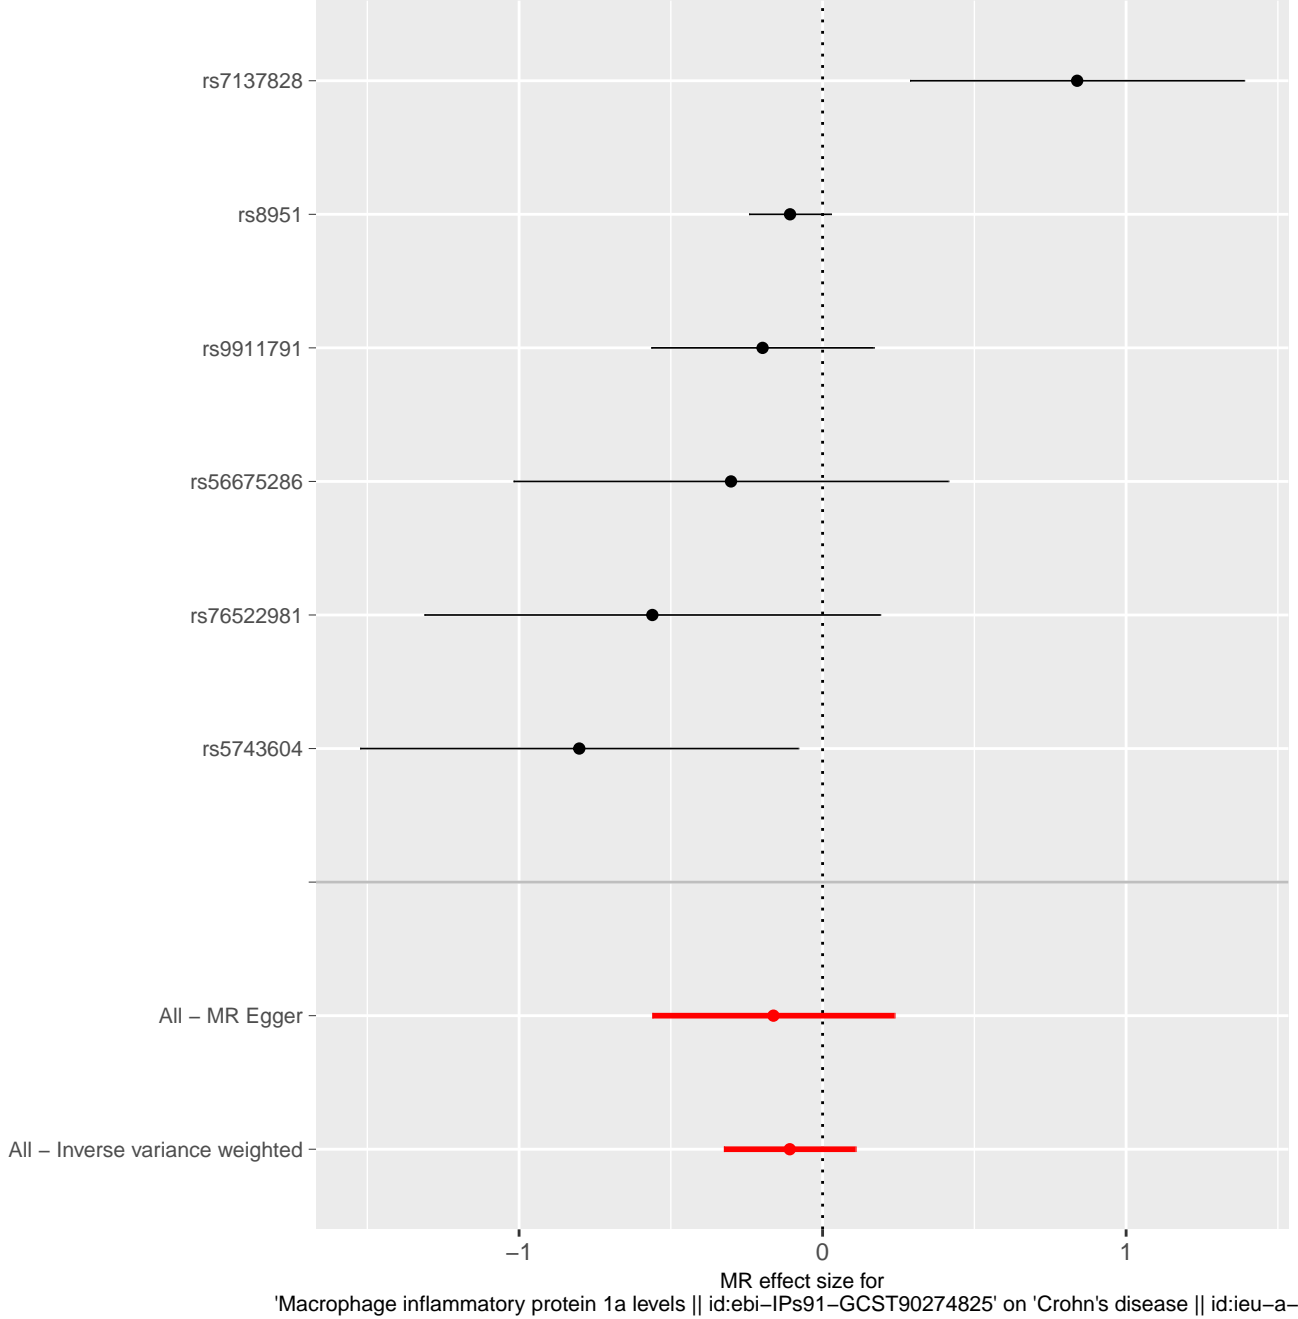

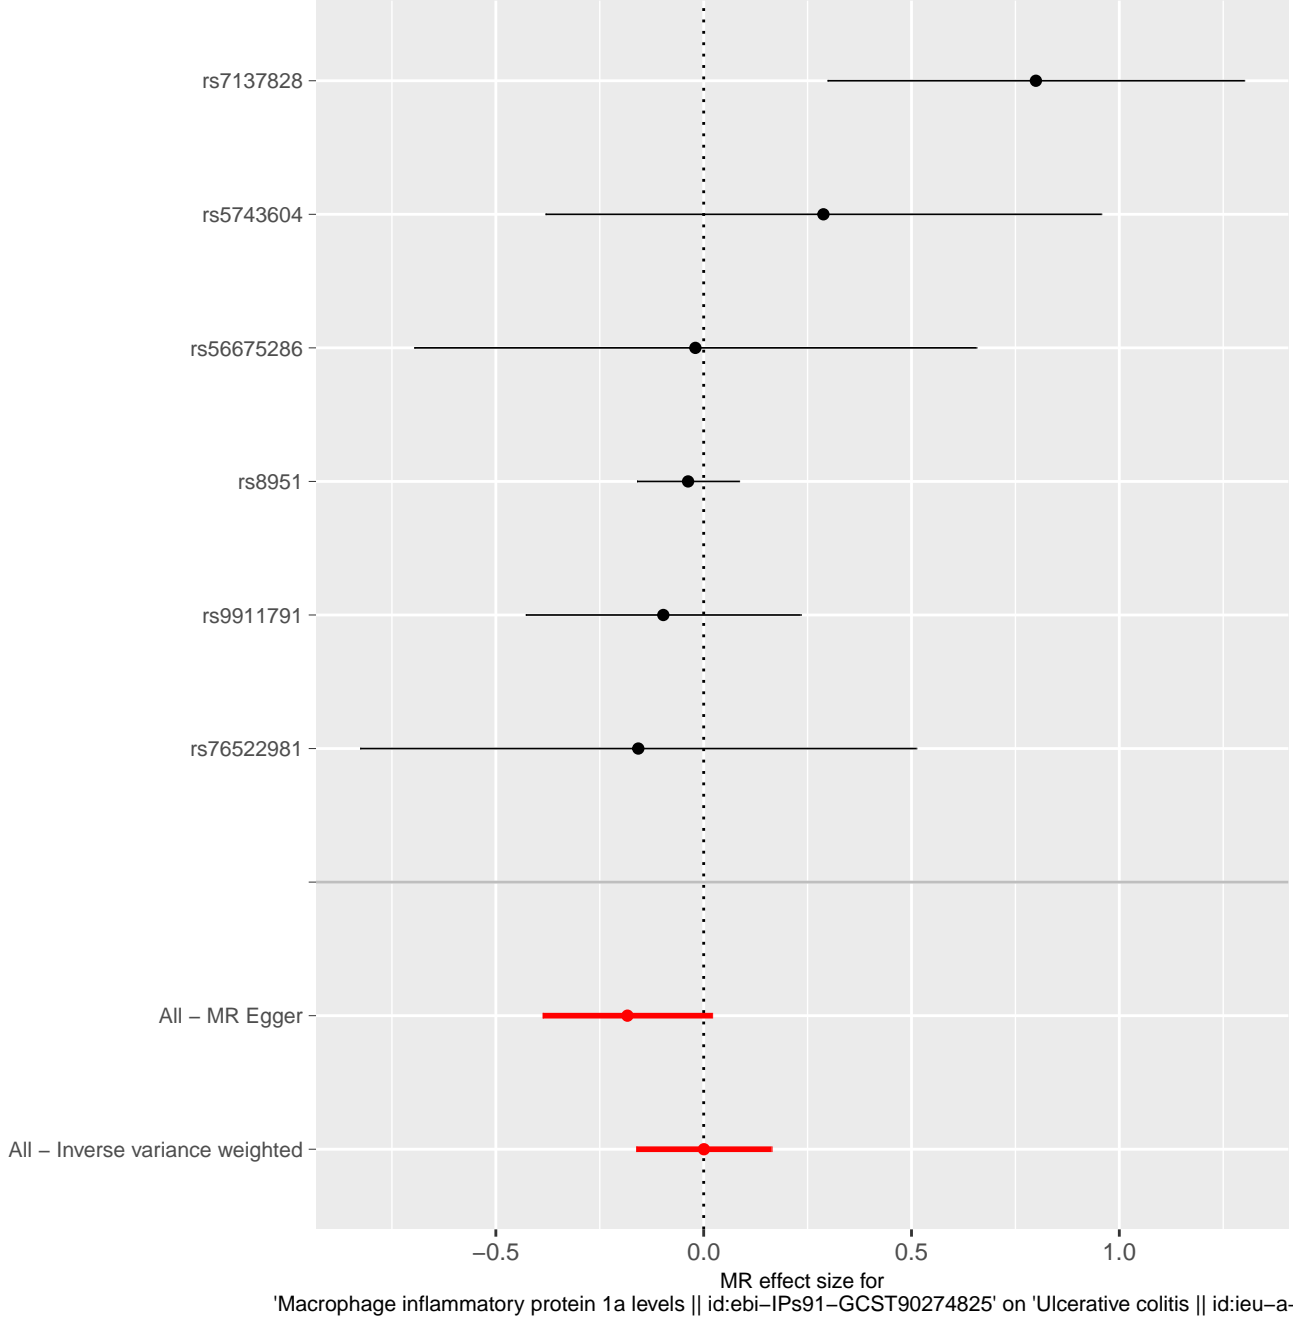

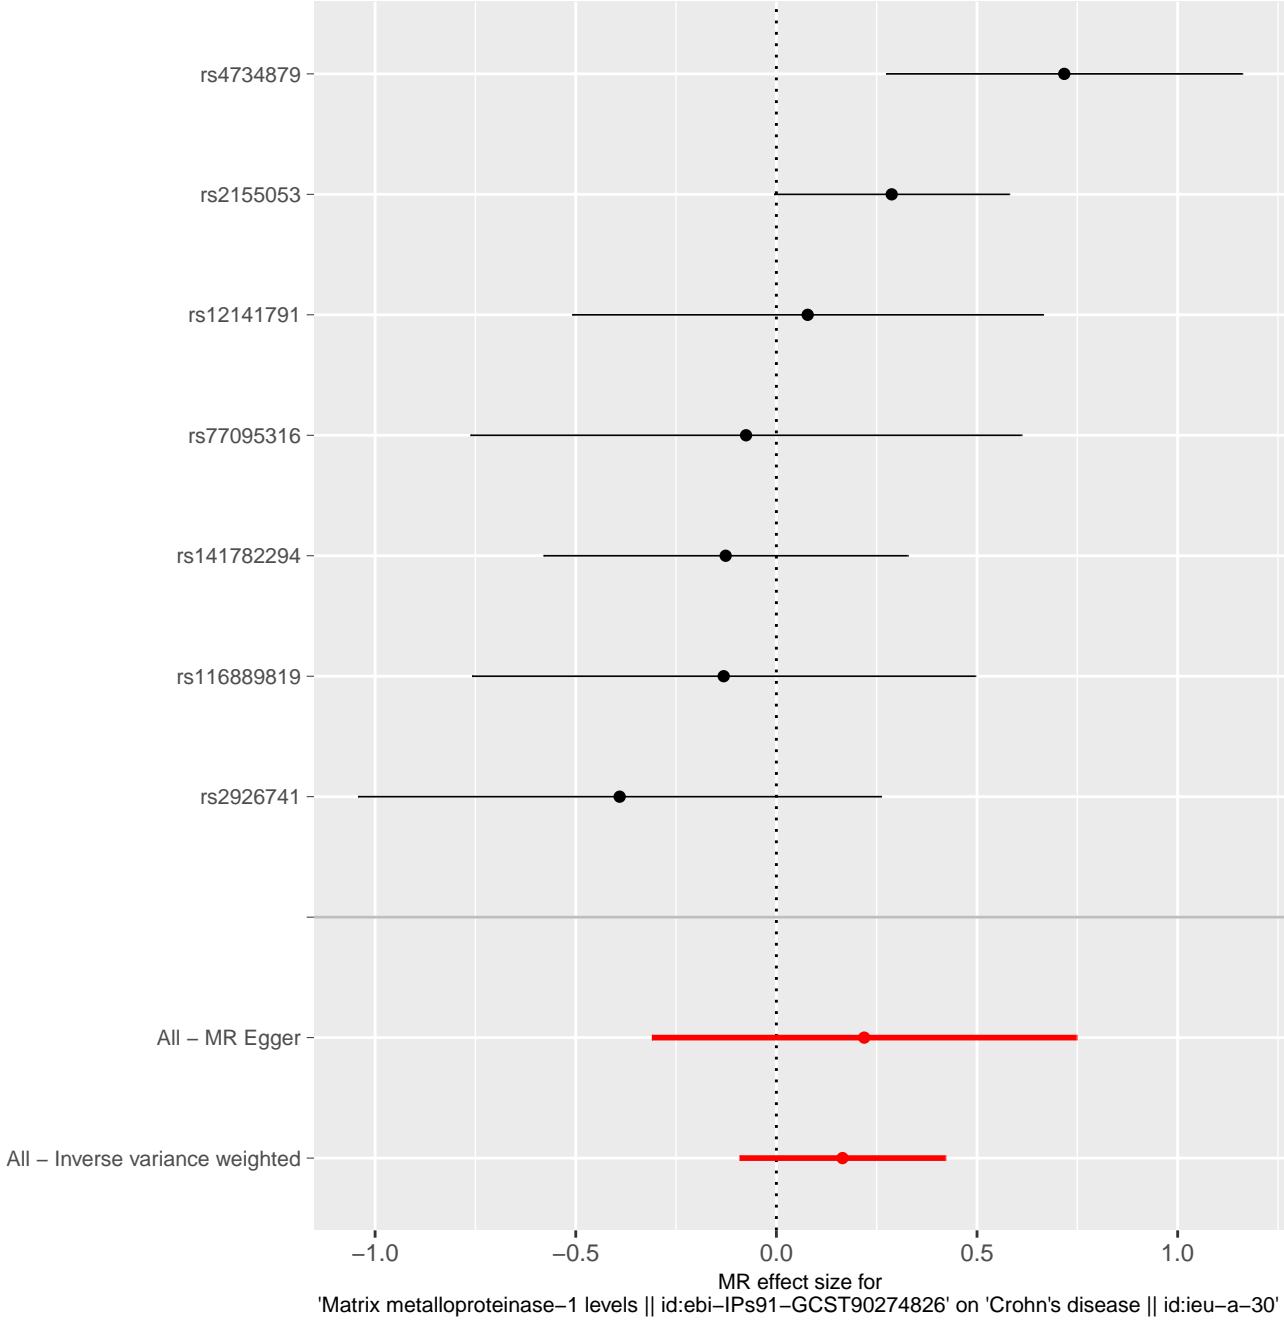

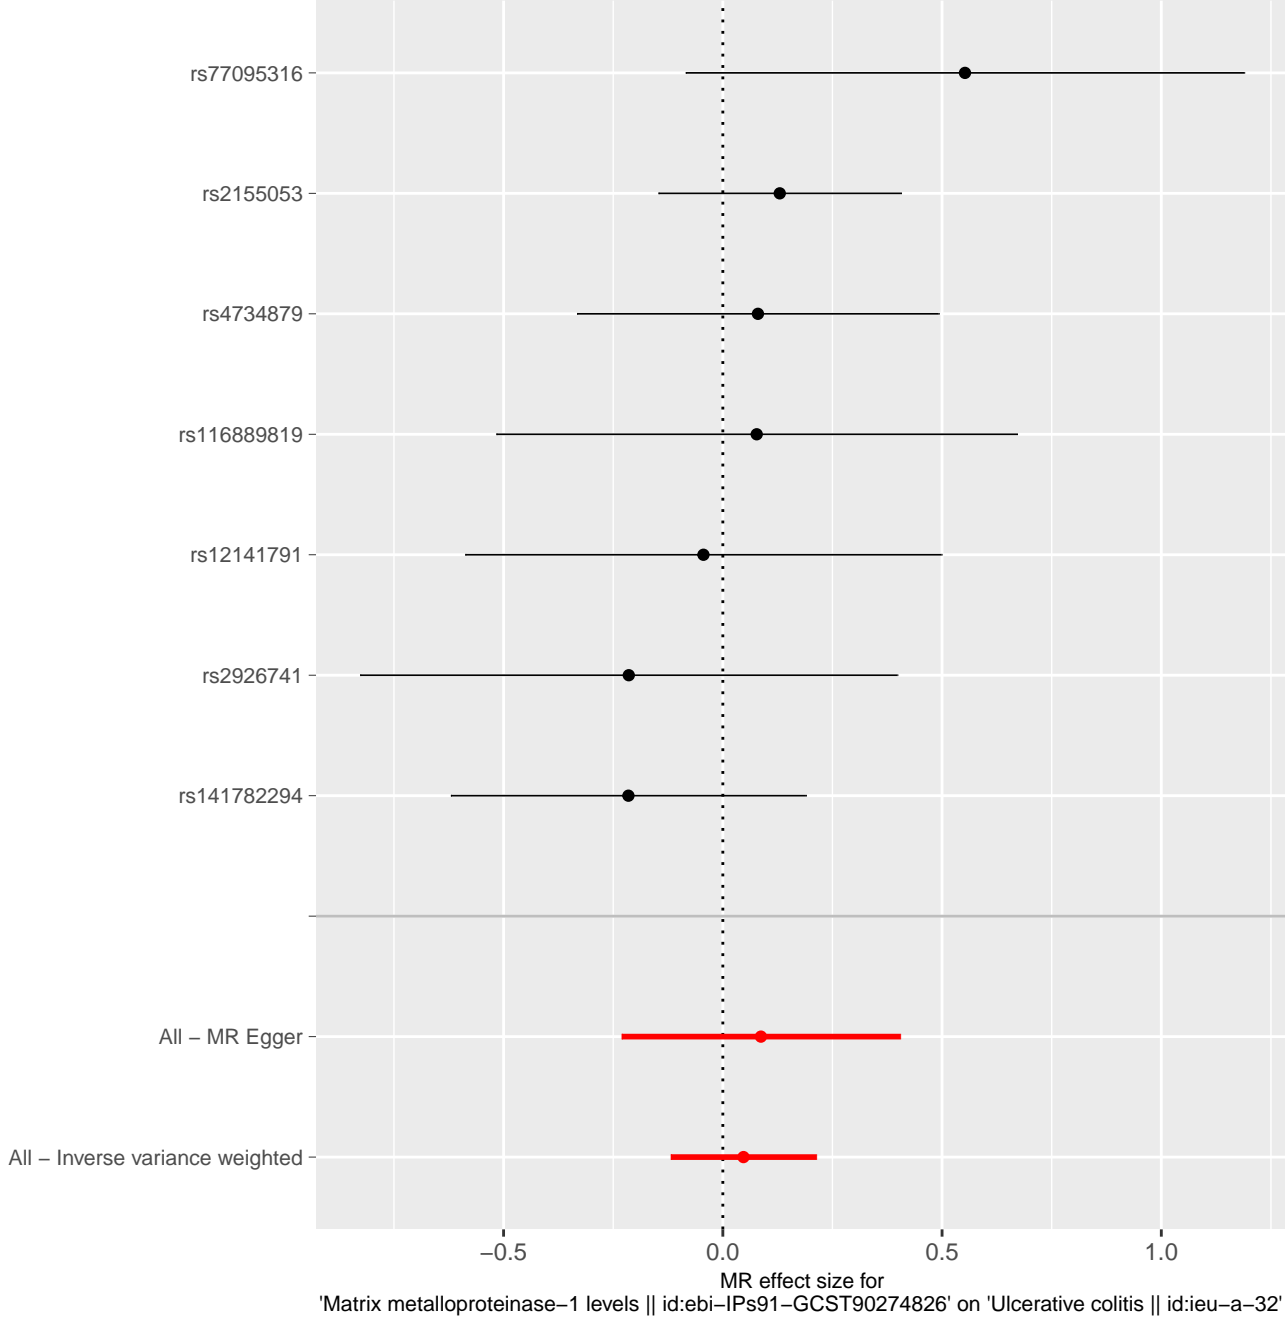

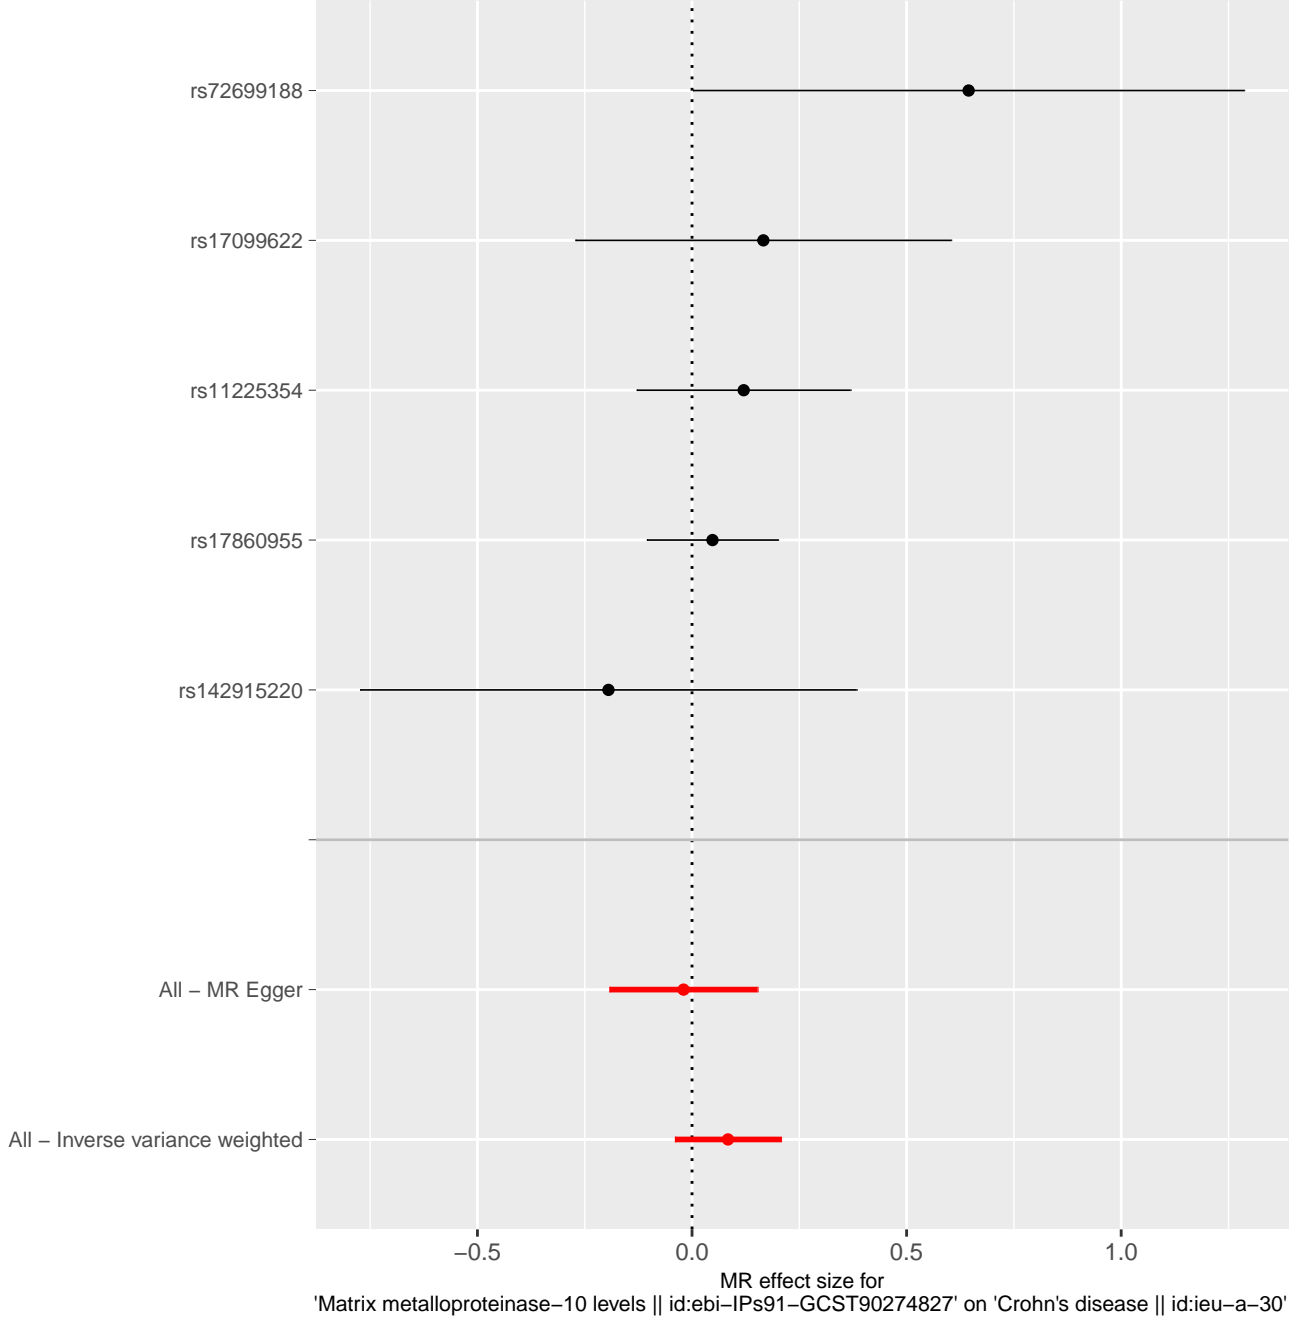



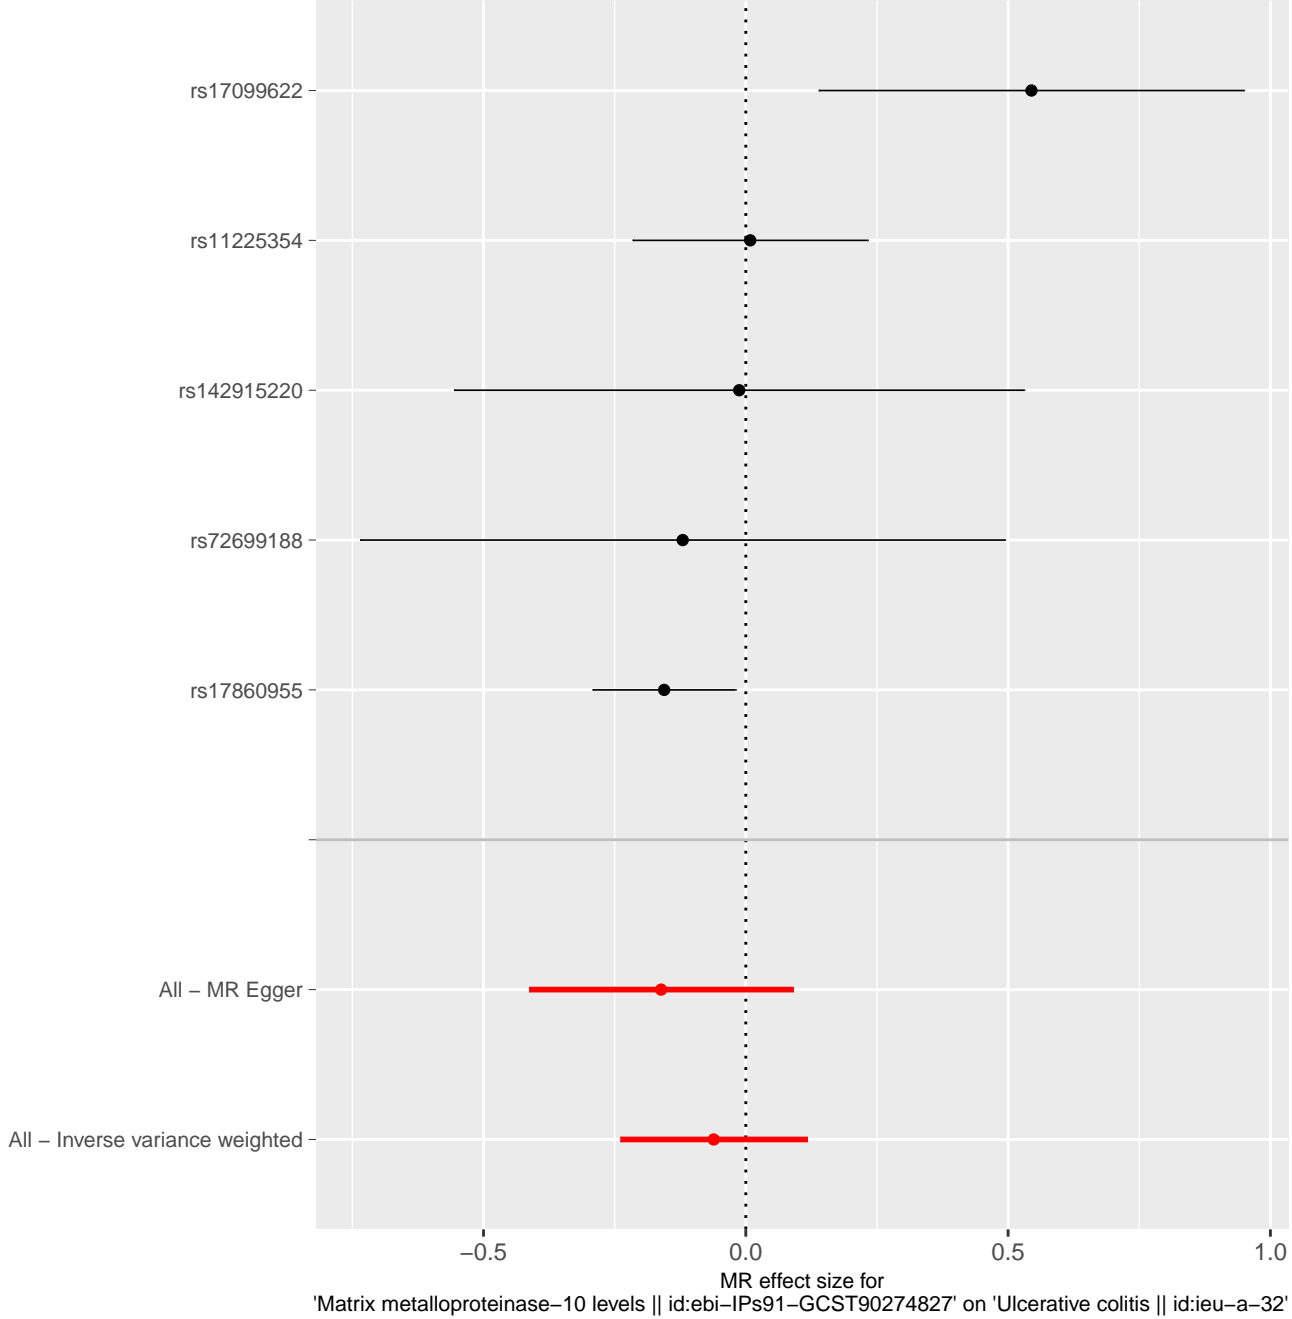

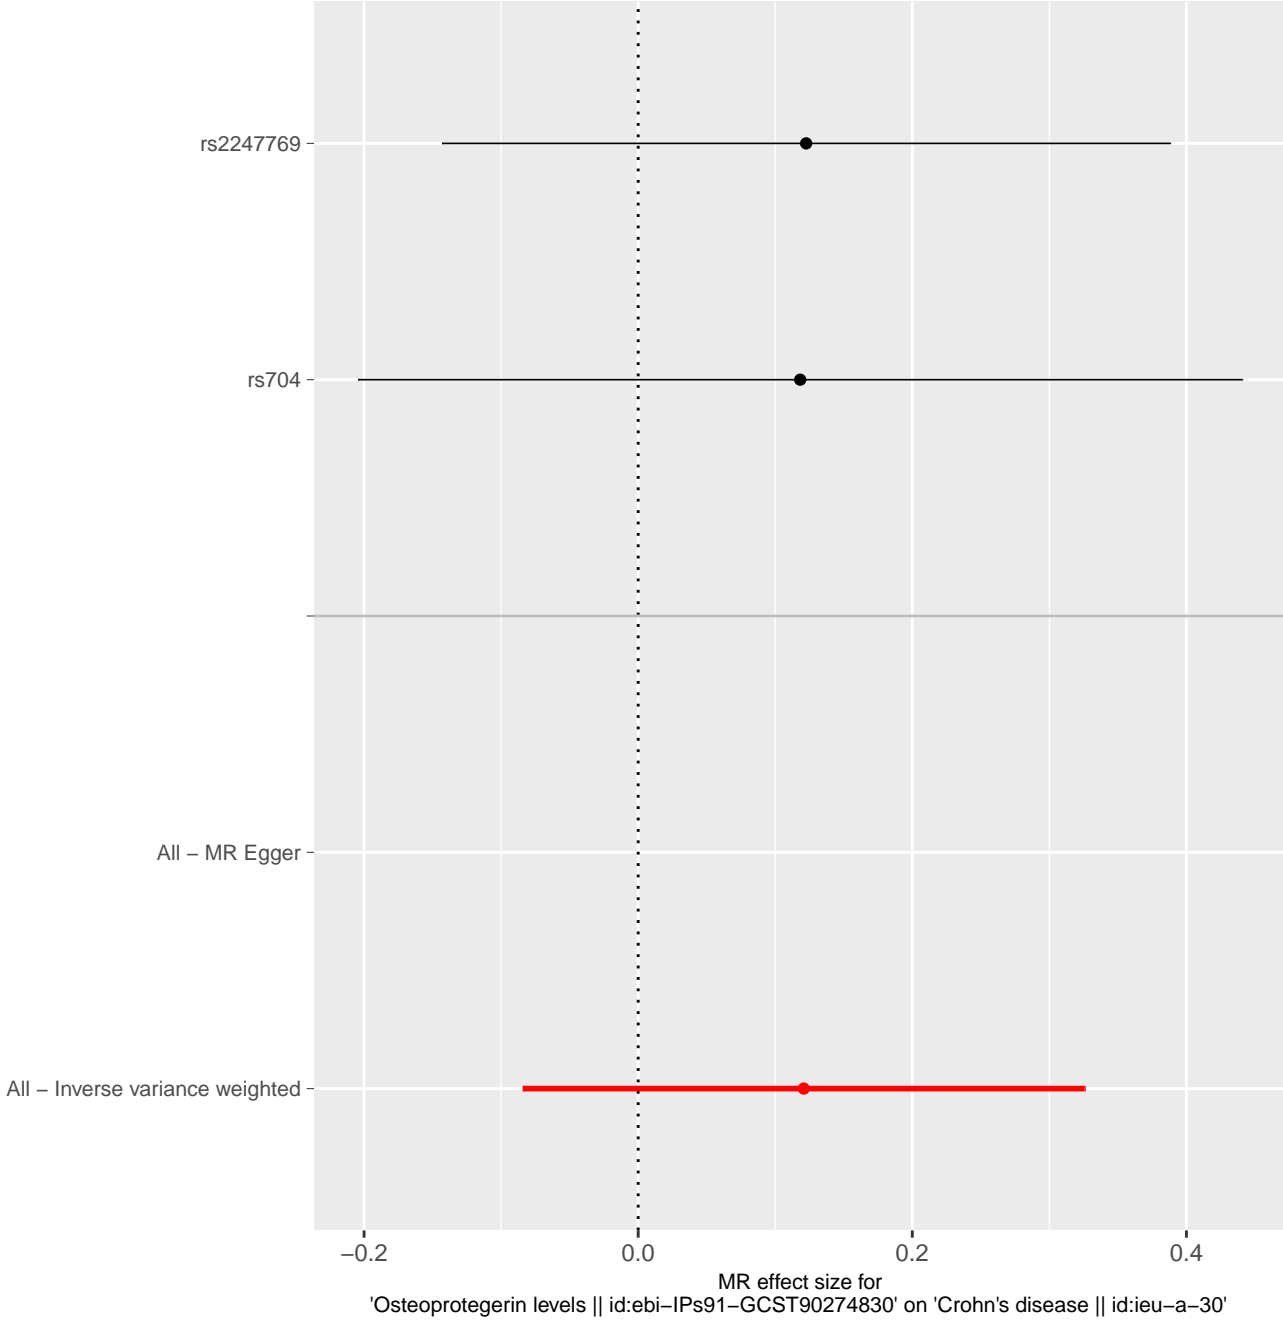

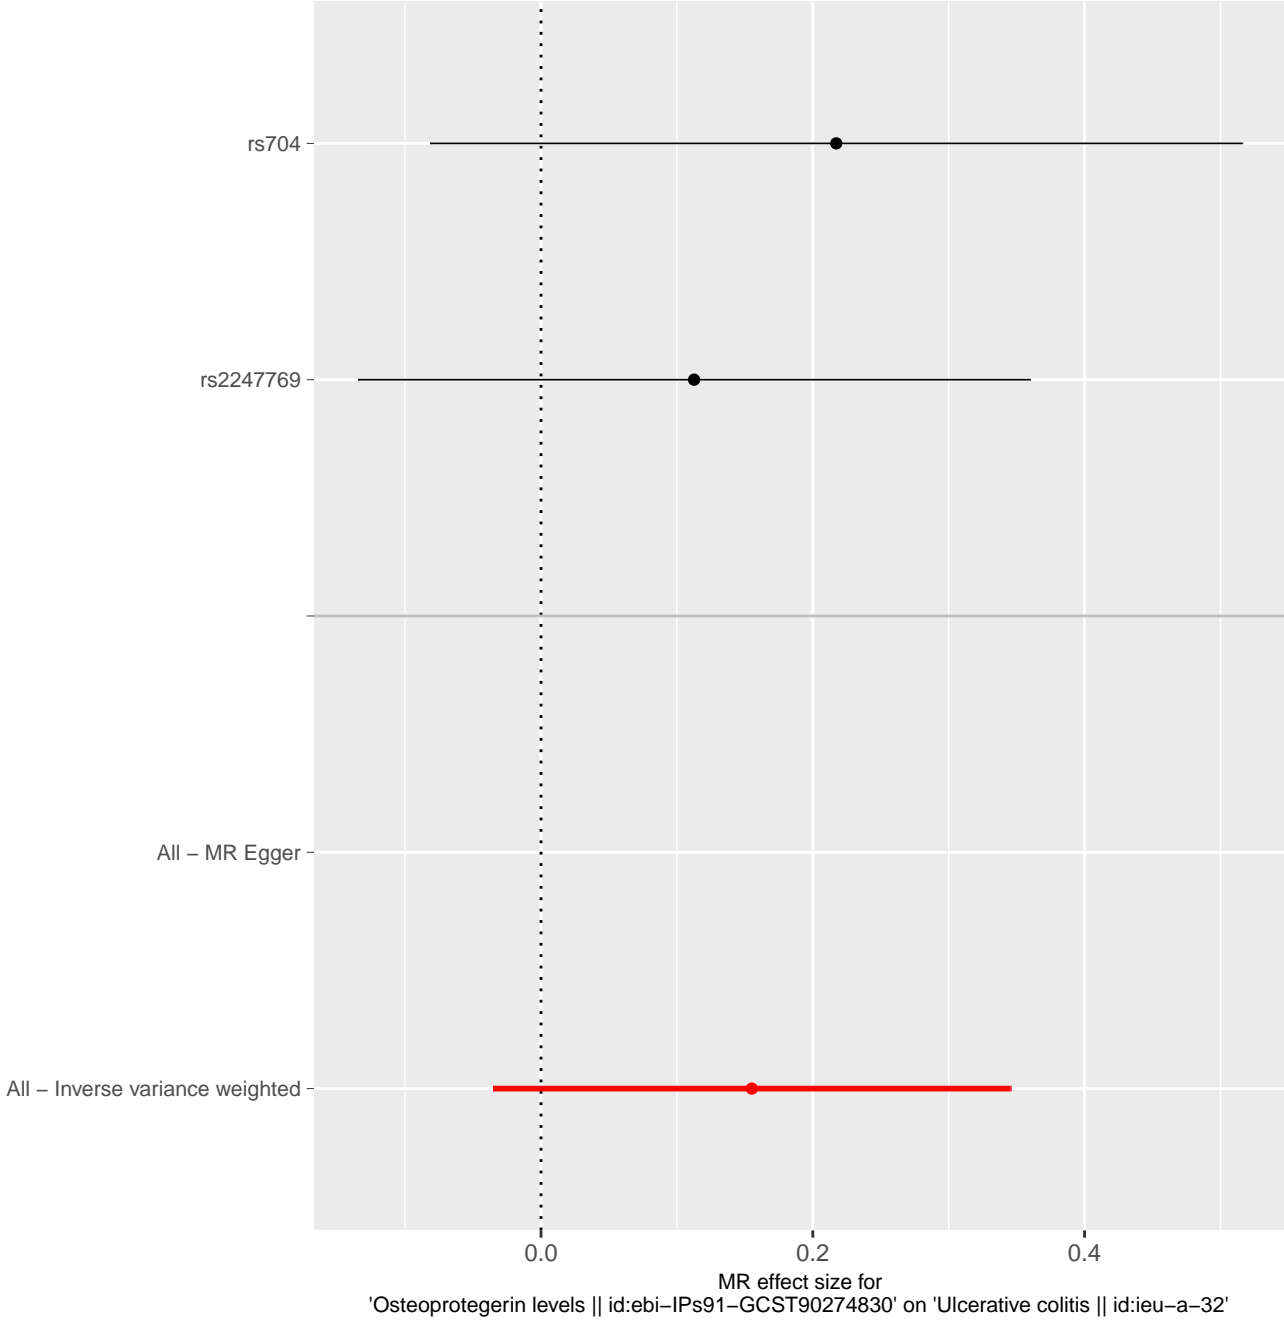

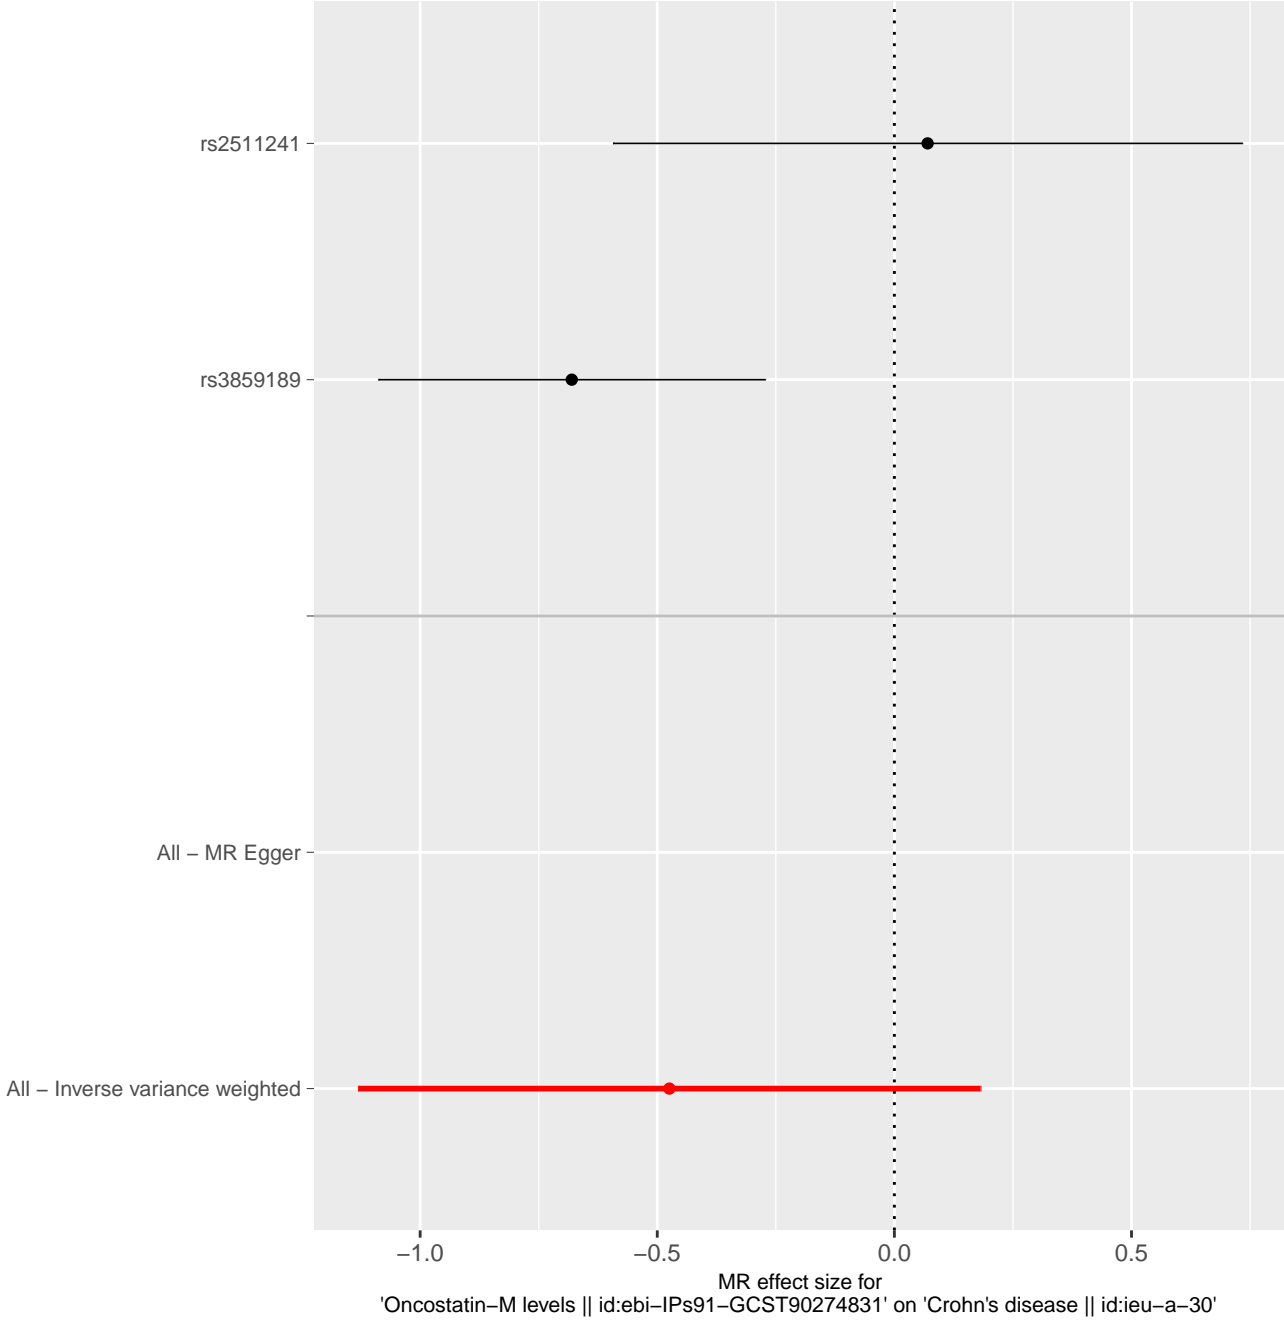

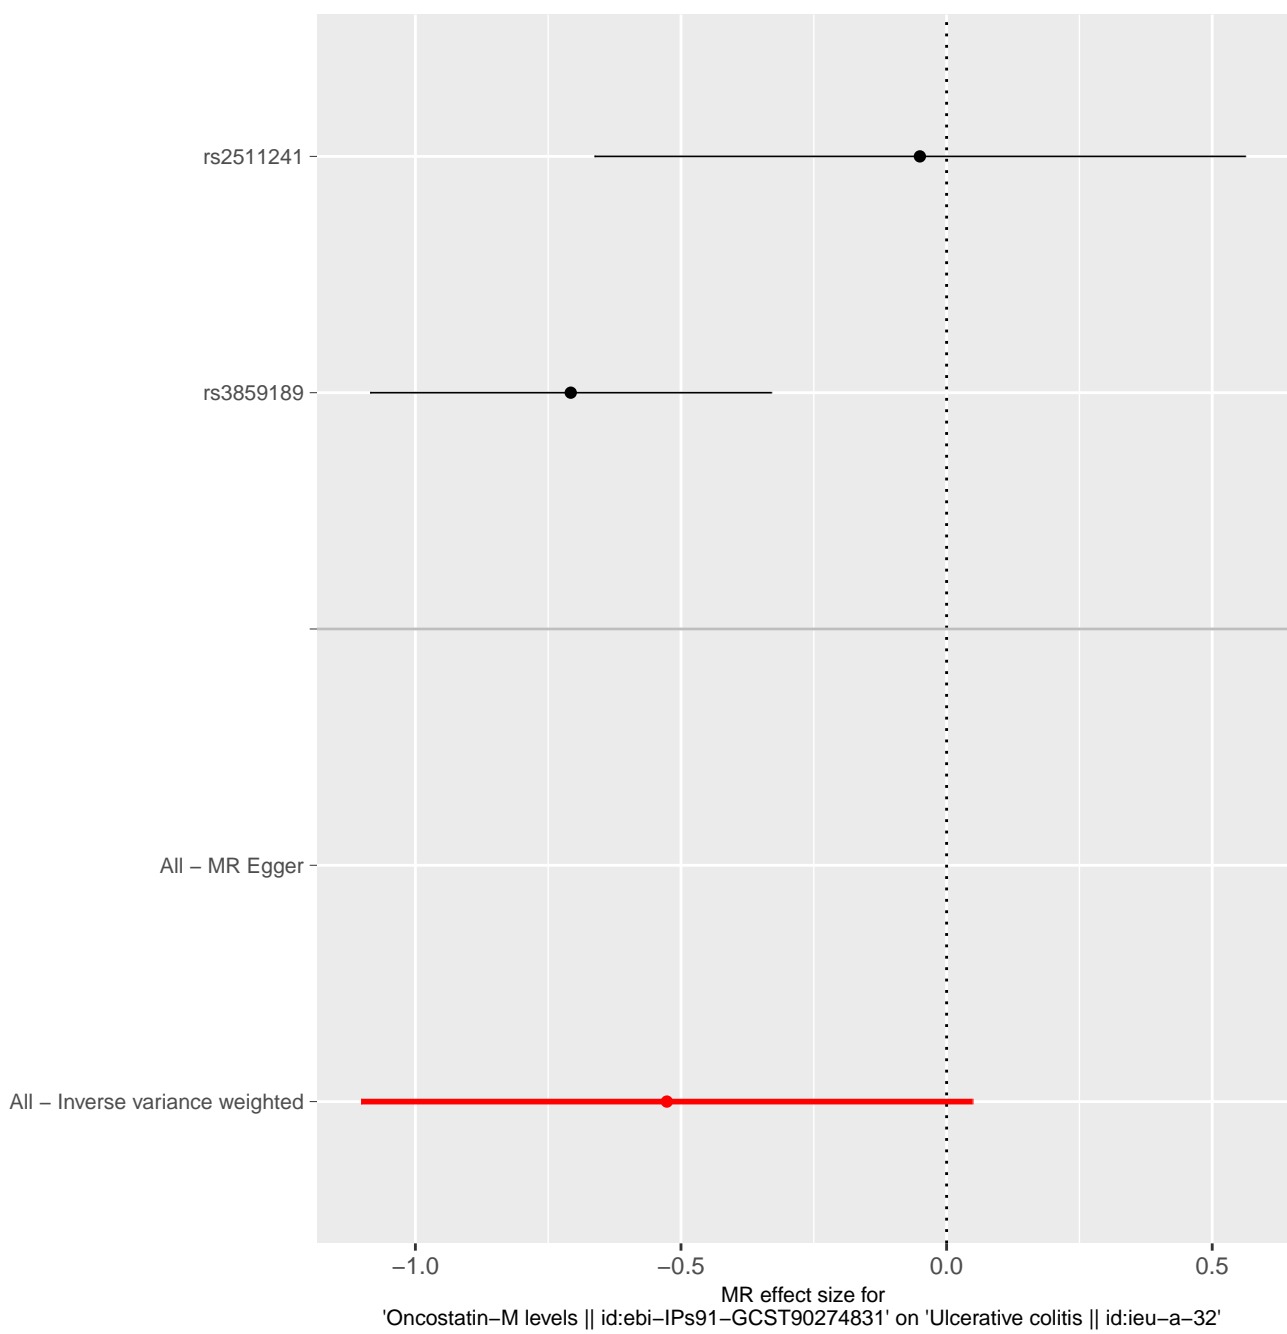

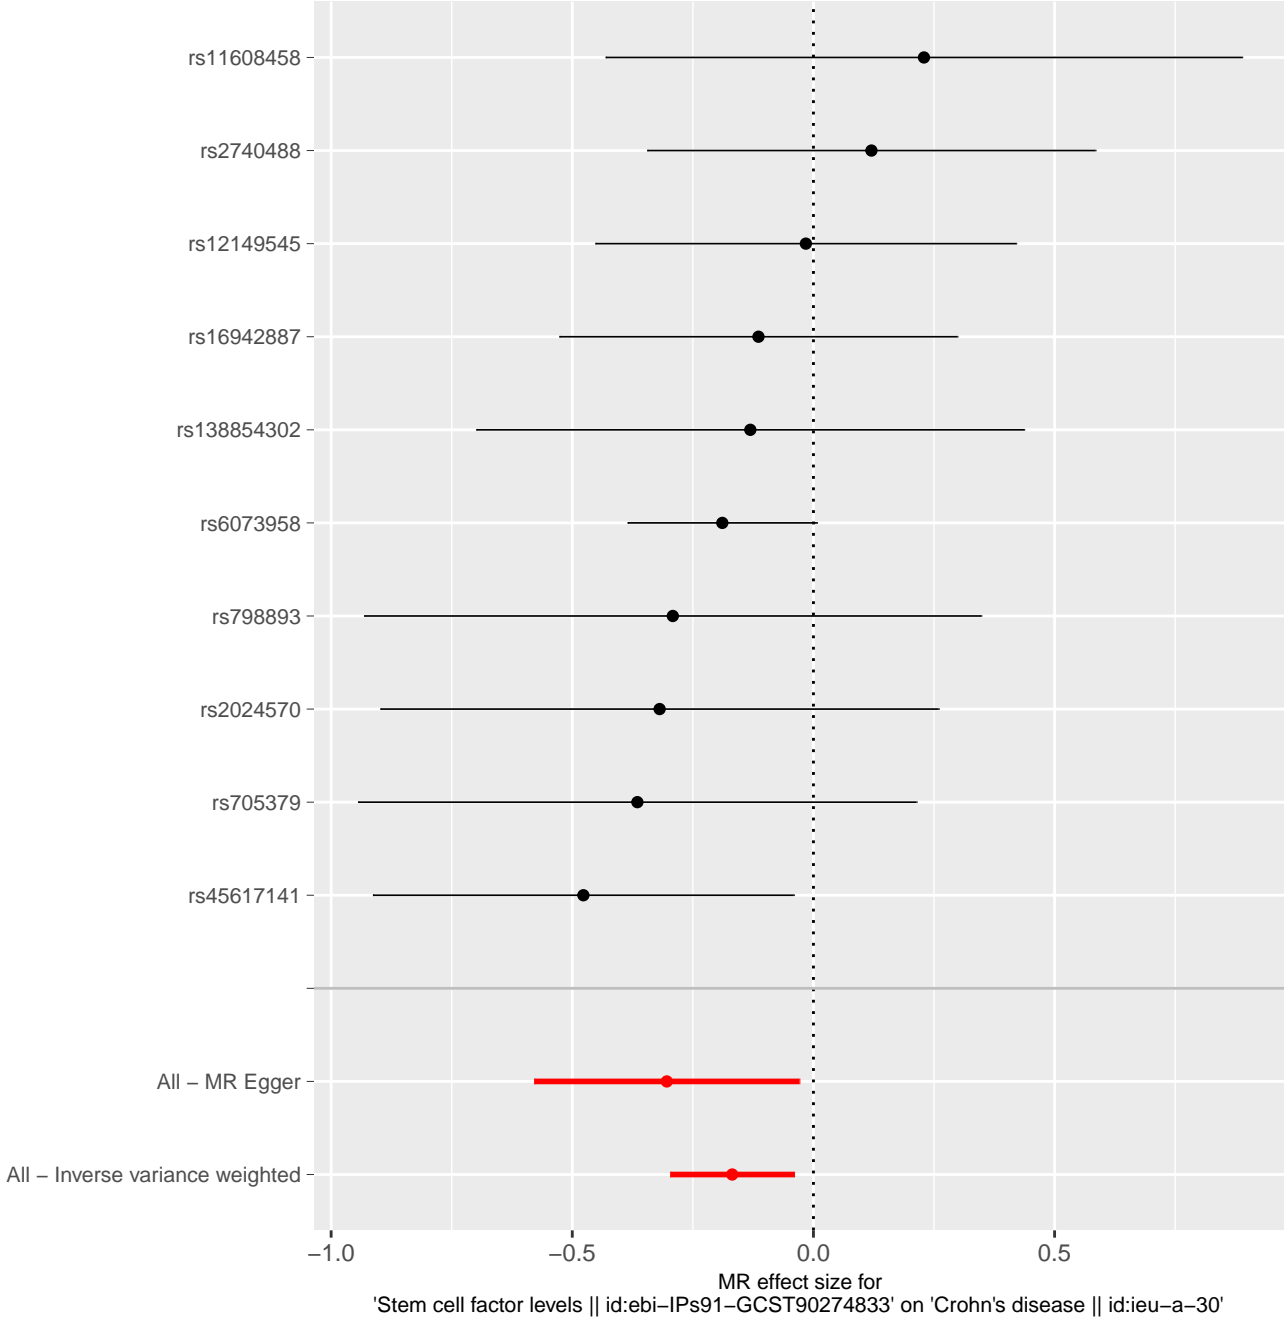

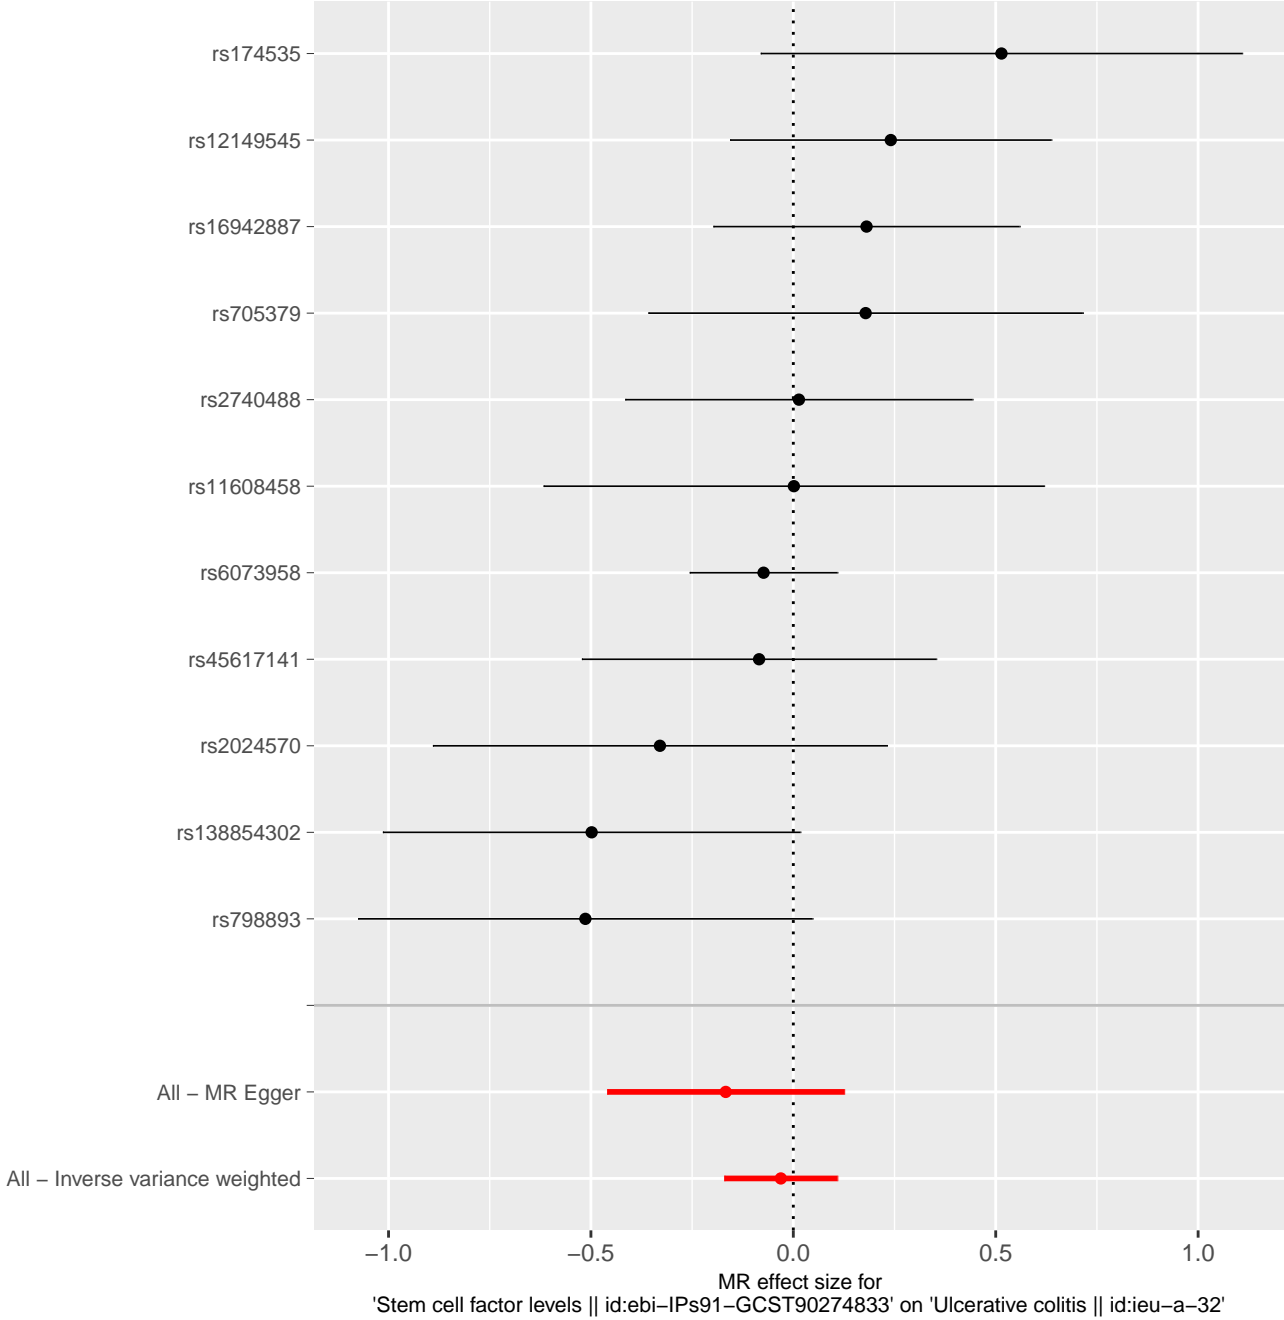

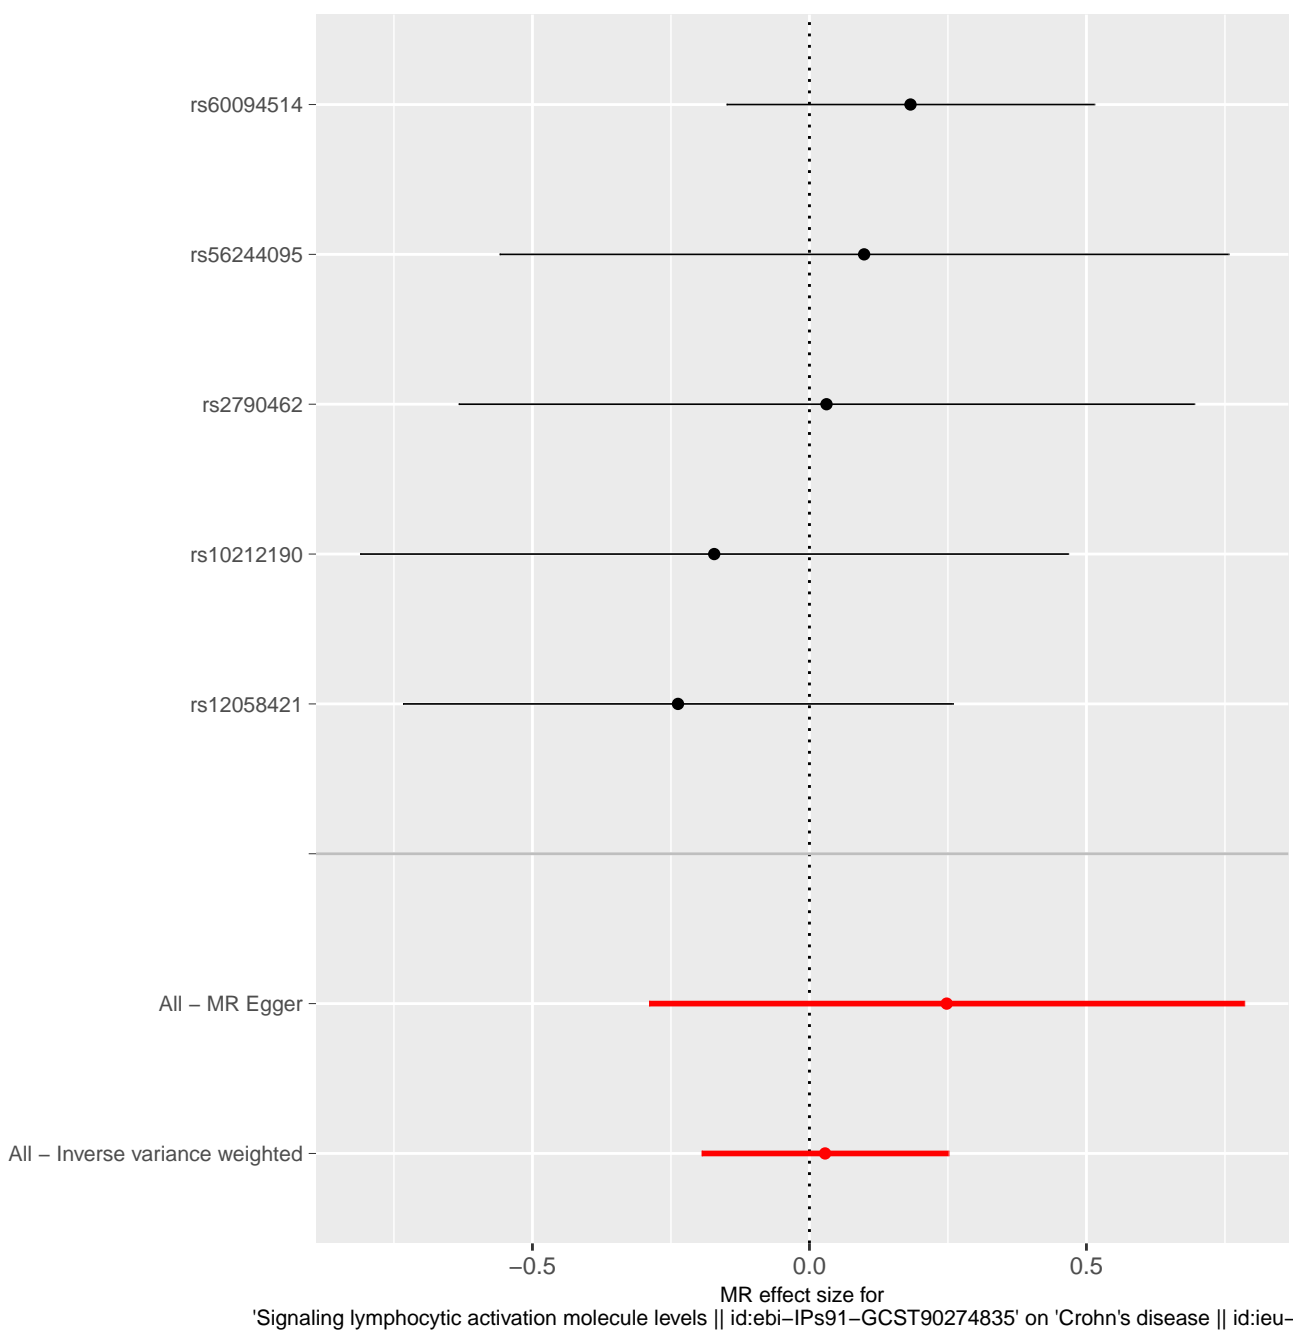



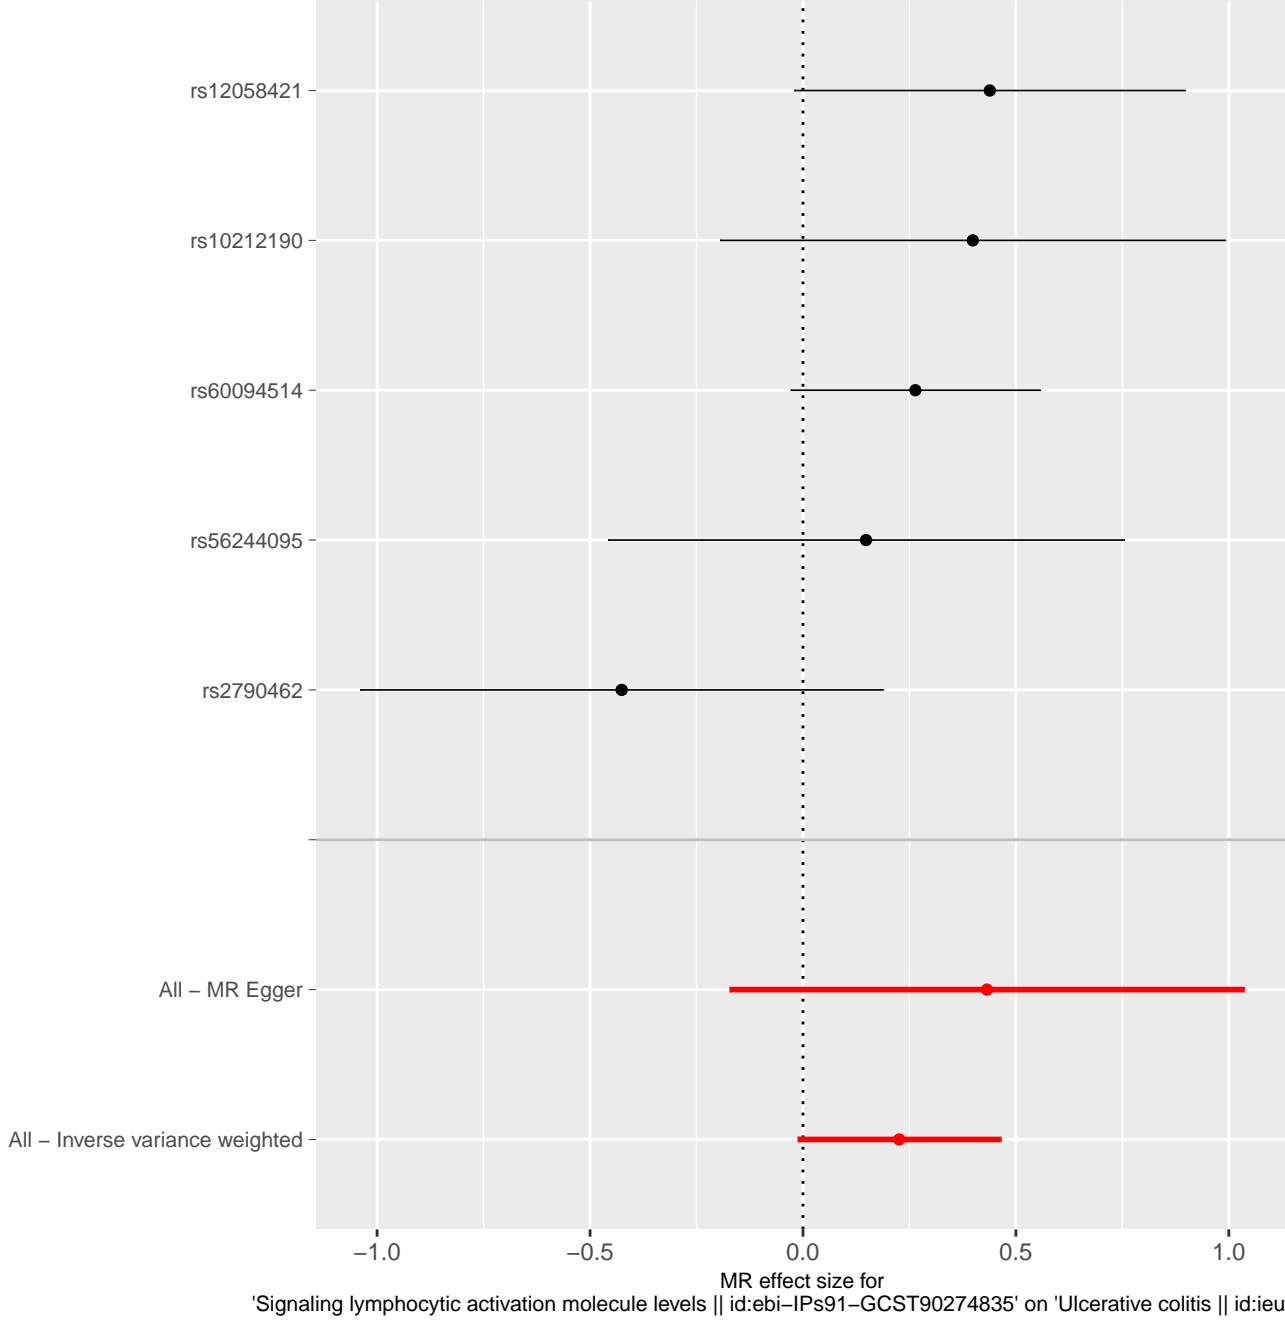

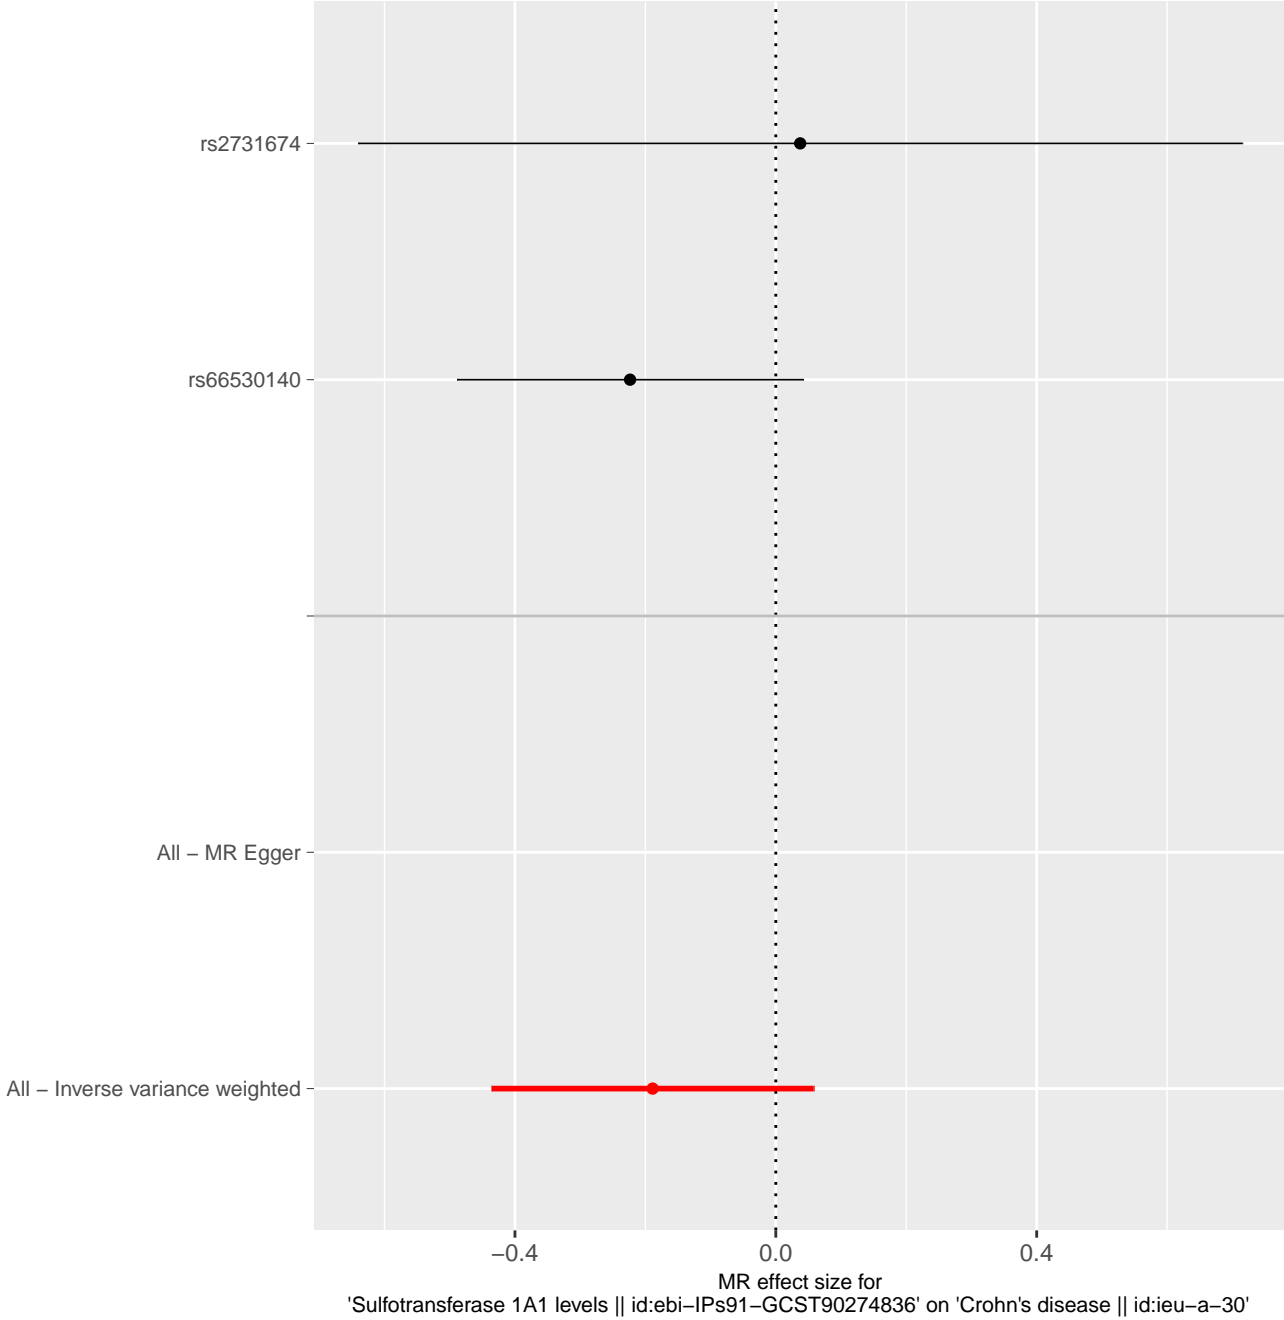

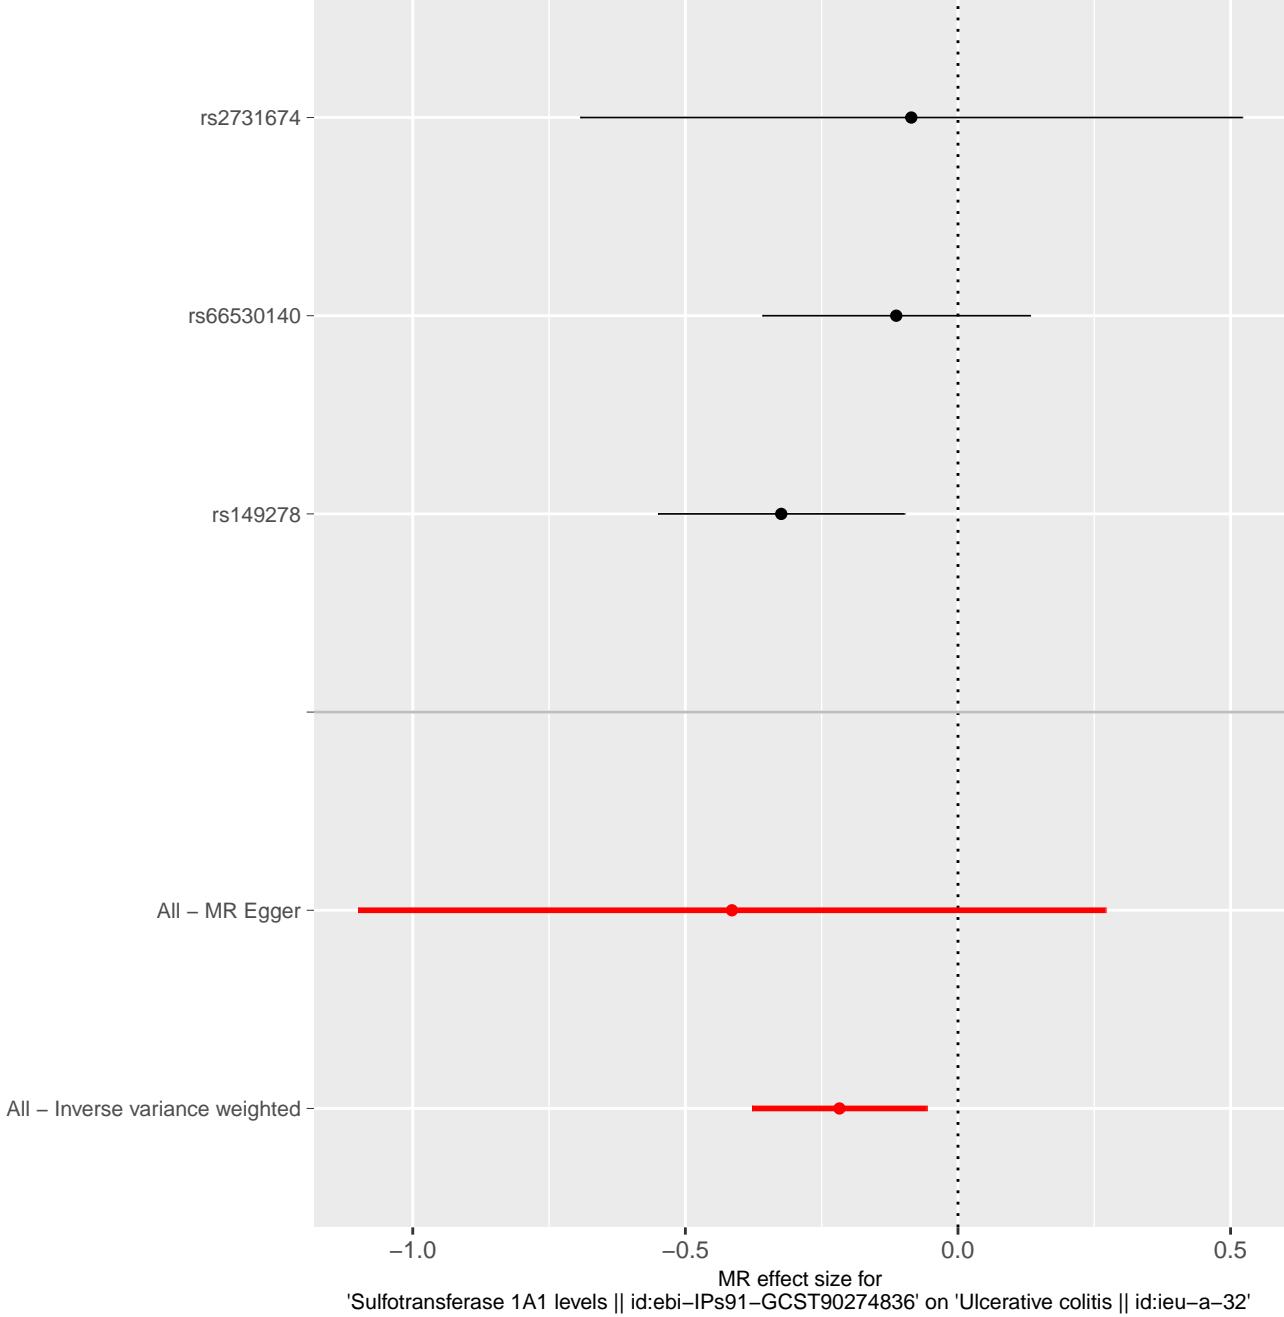

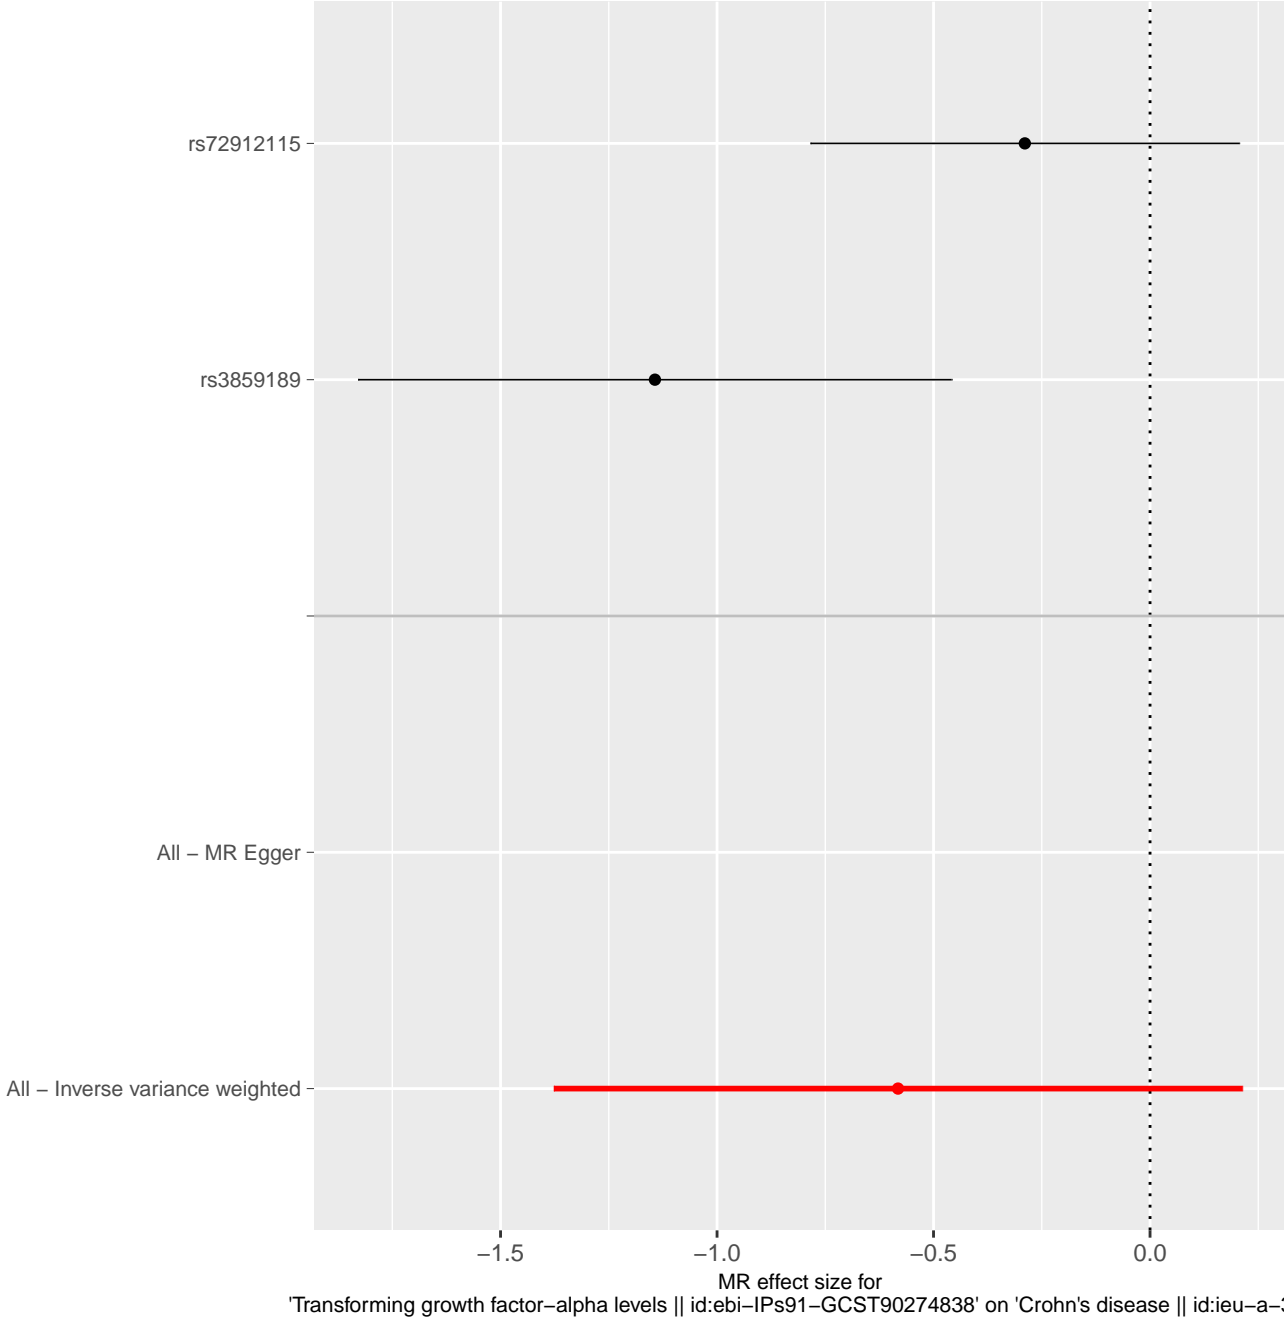

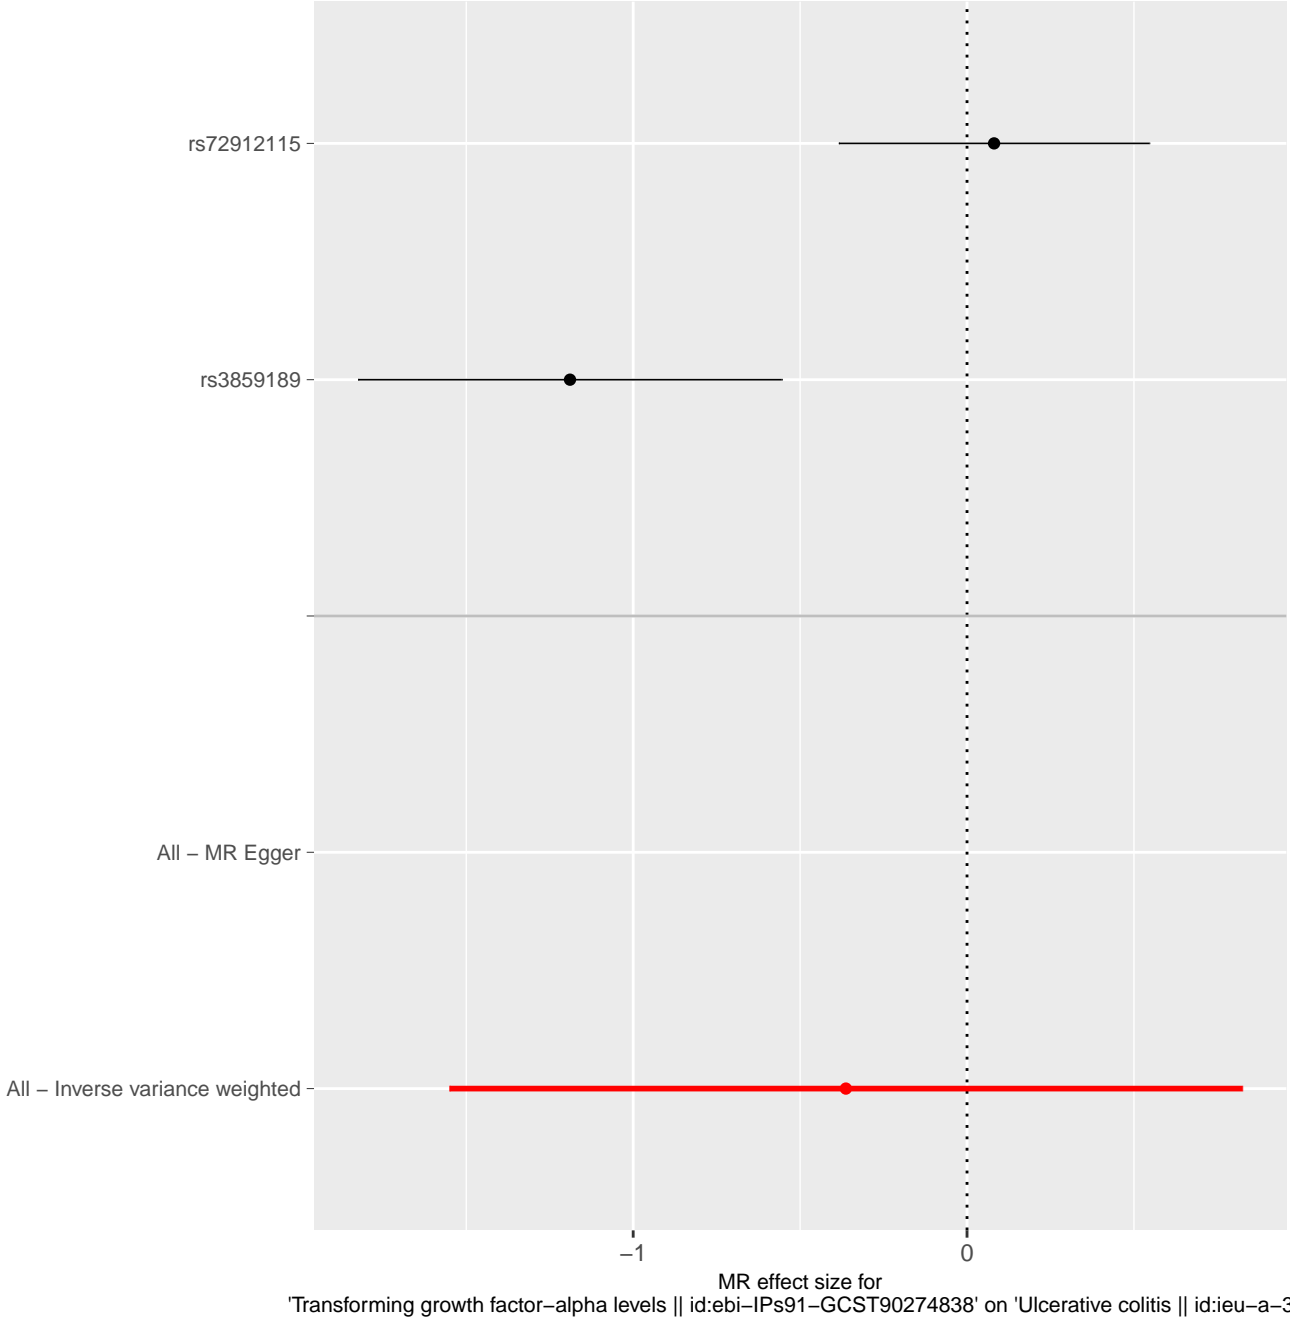

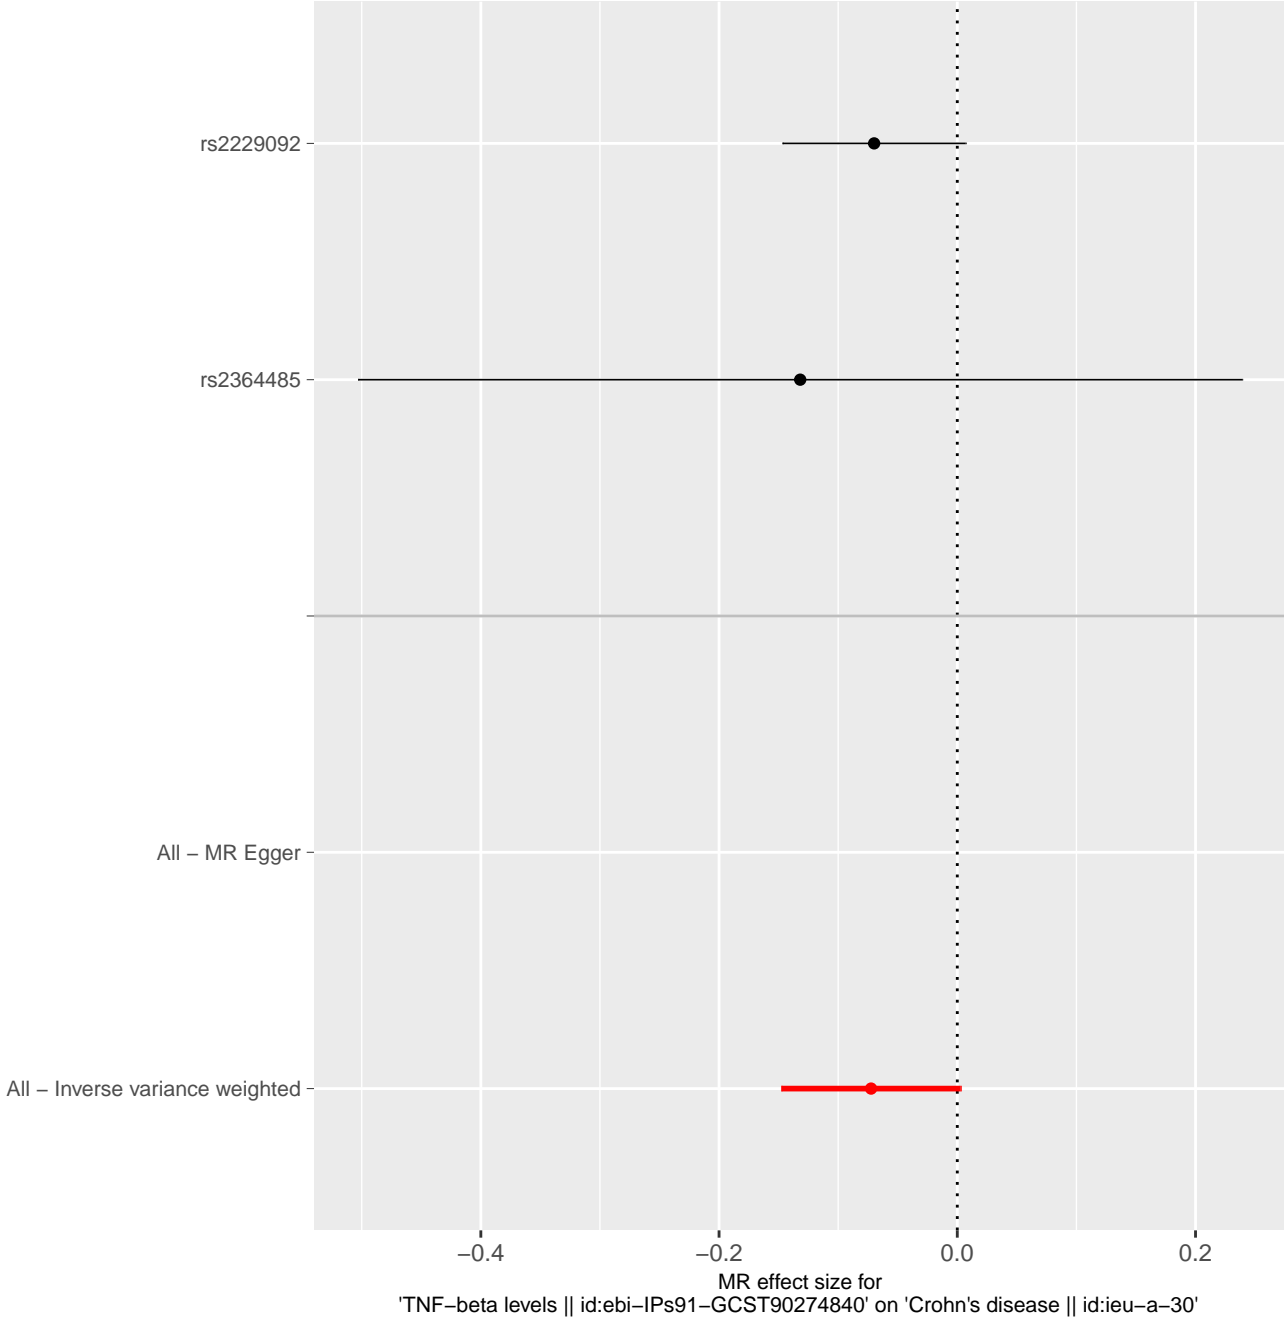

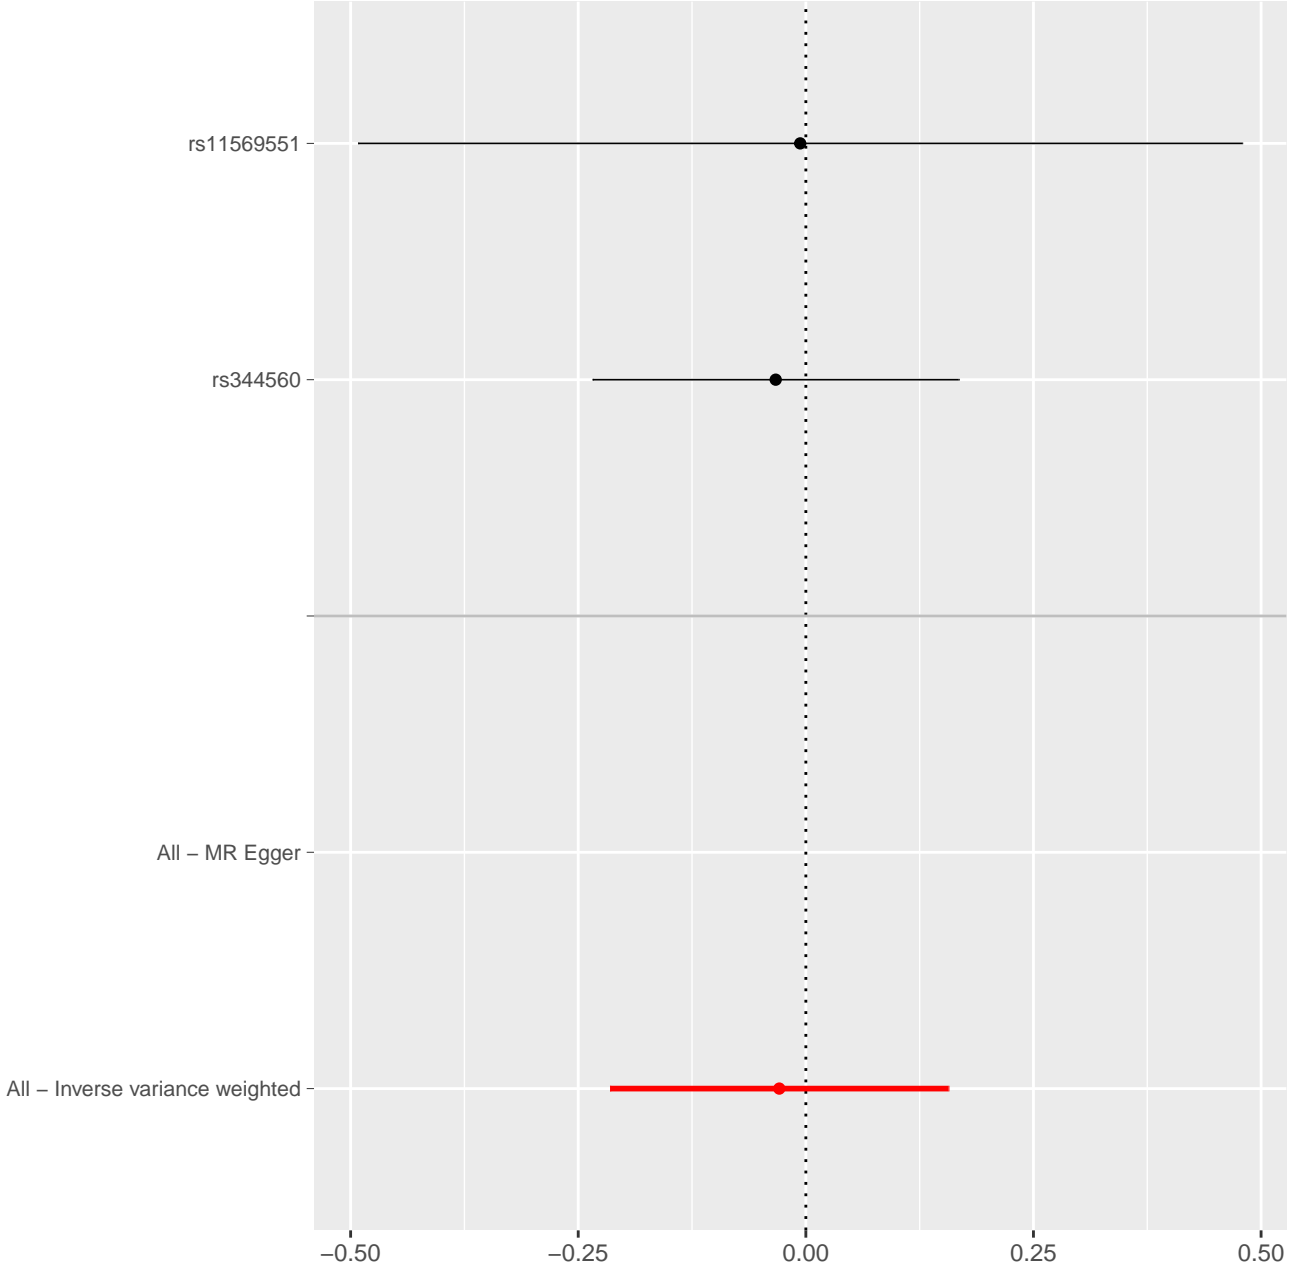

MR effect size for 'Tumor necrosis factor ligand superfamily member 14 levels || id:ebi-IPs91-GCST90274842' on 'Crohn's disease || id:ebi-IPs91-GCST90274842'

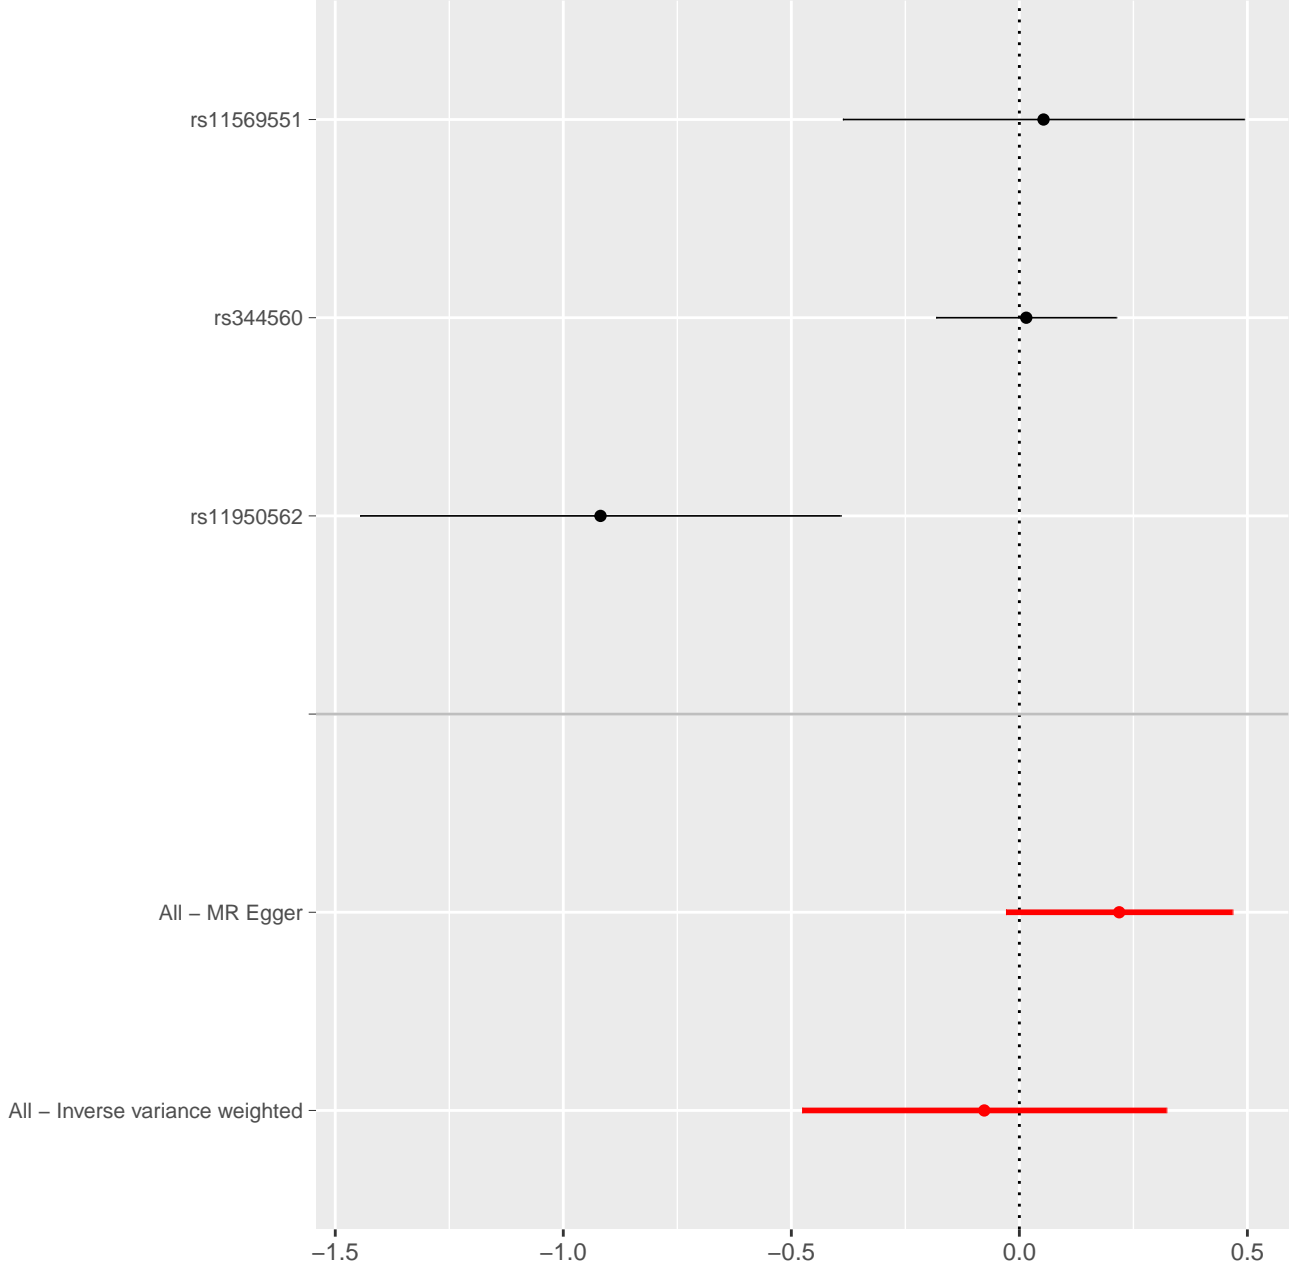

MR effect size for  
'Tumor necrosis factor ligand superfamily member 14 levels || id:ebi-IPs91-GCST90274842' on 'Ulcerative colitis || id:



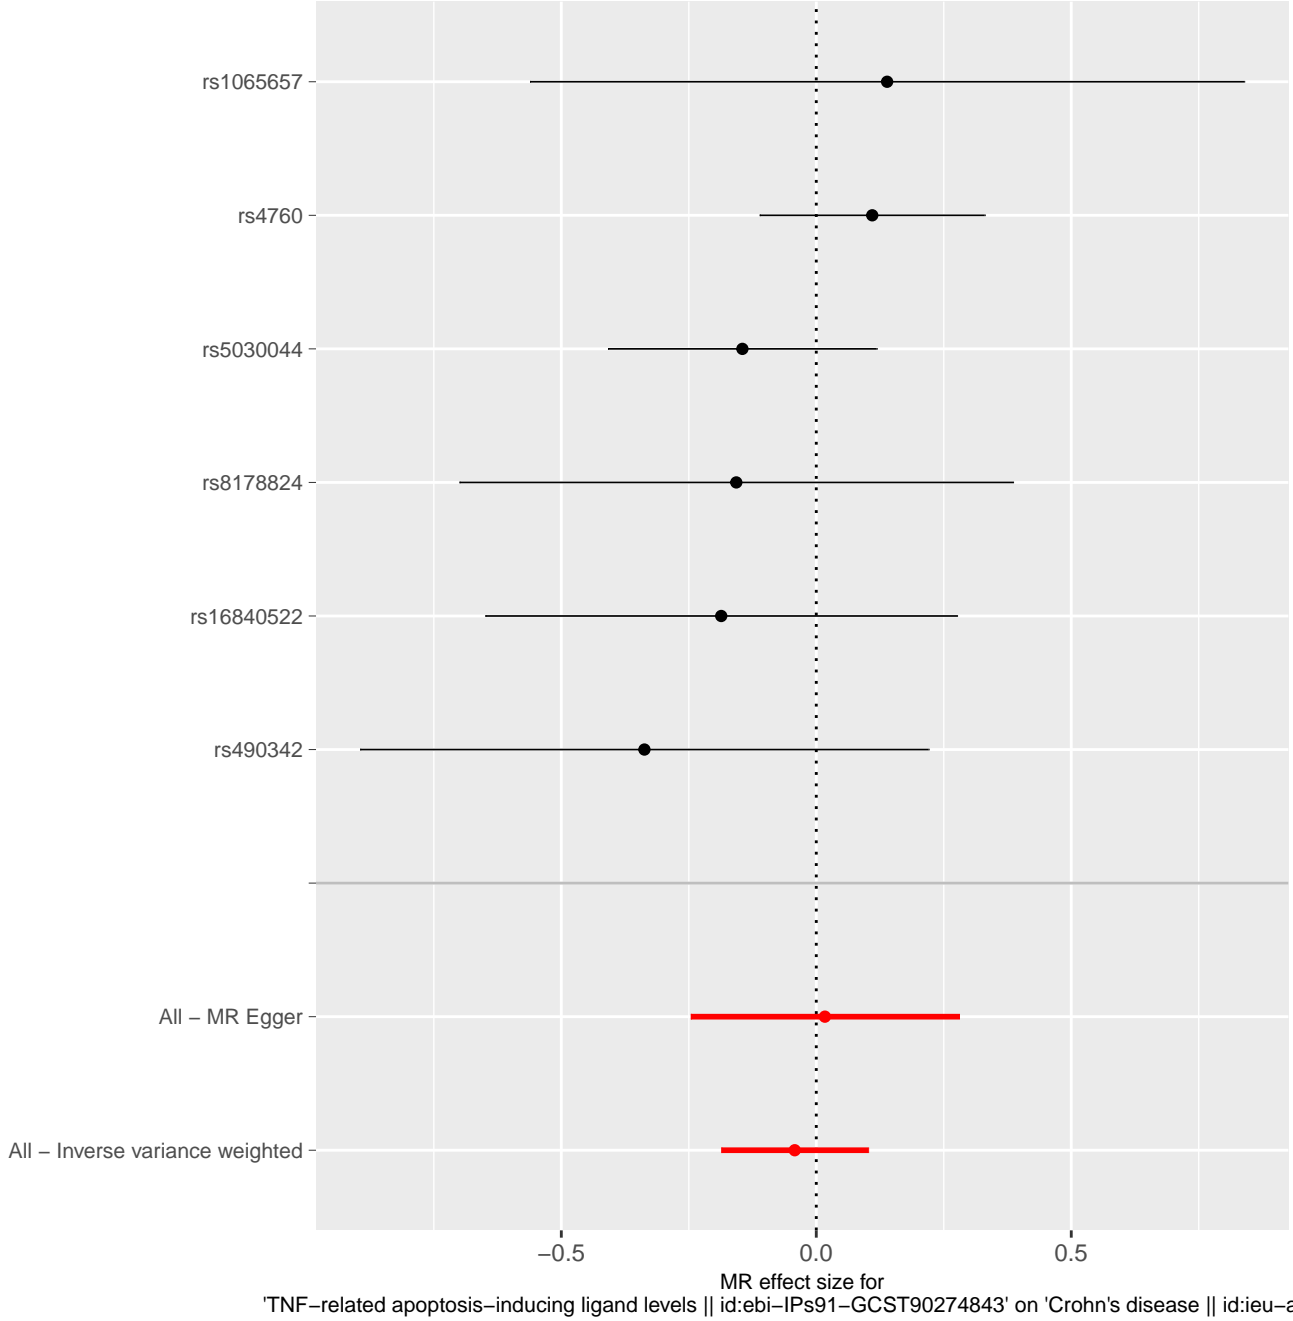

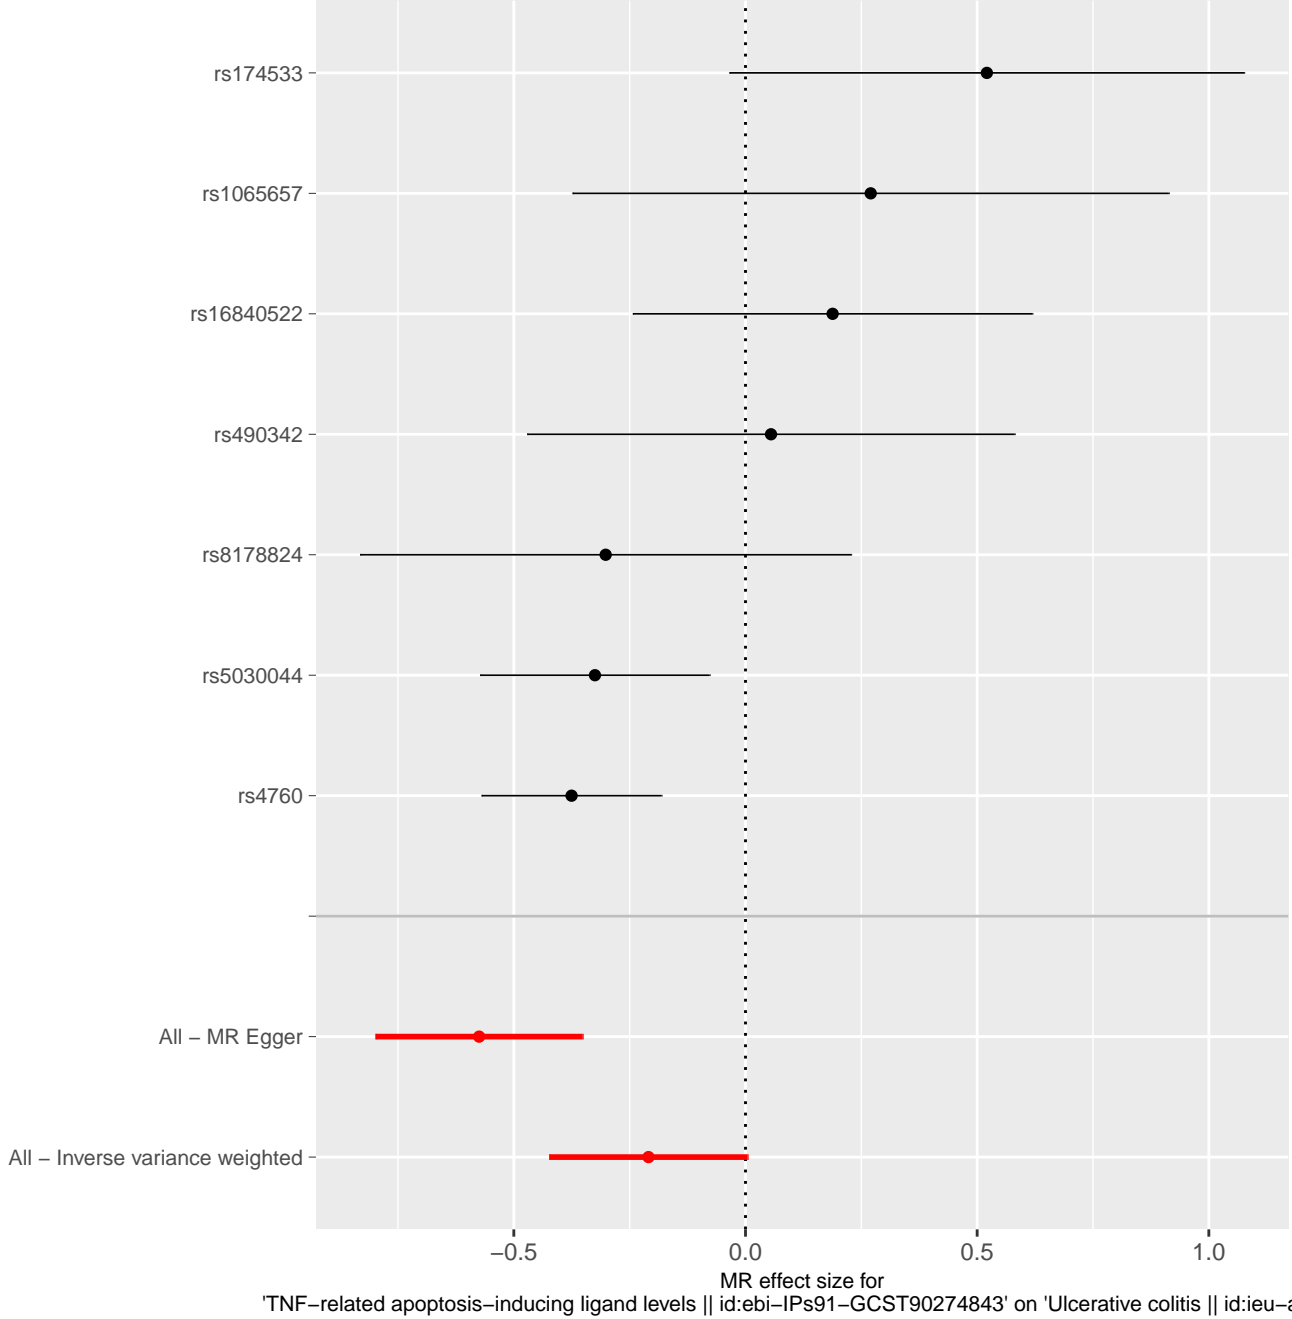

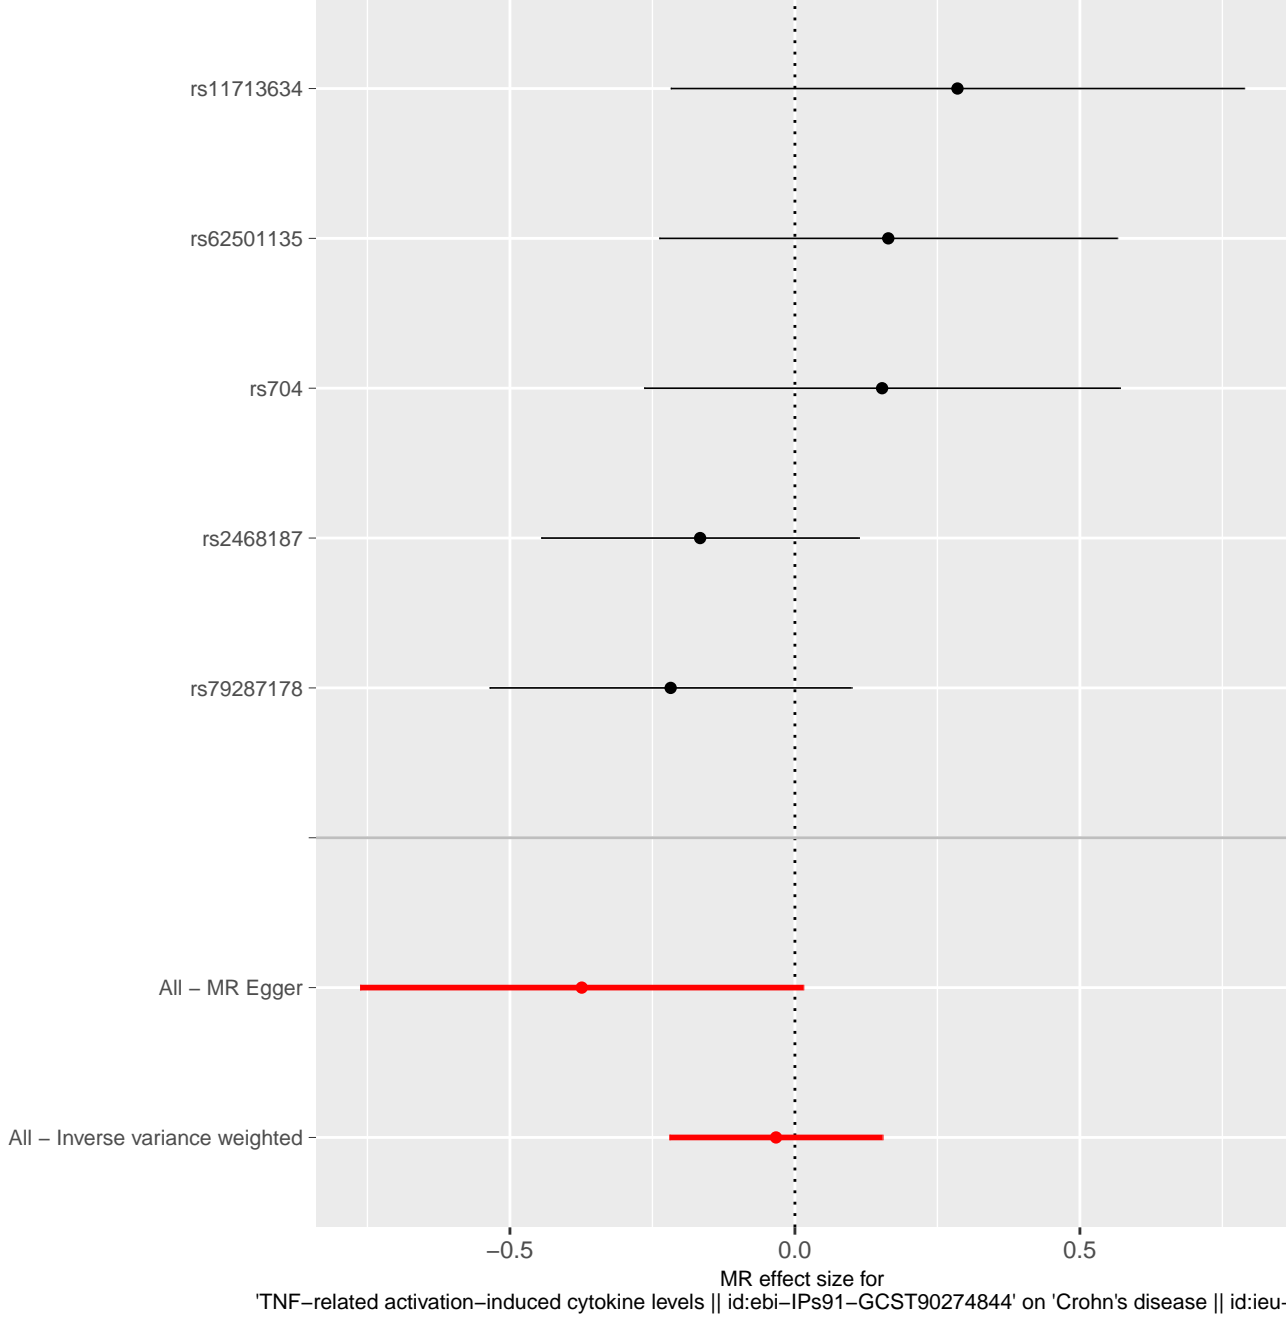

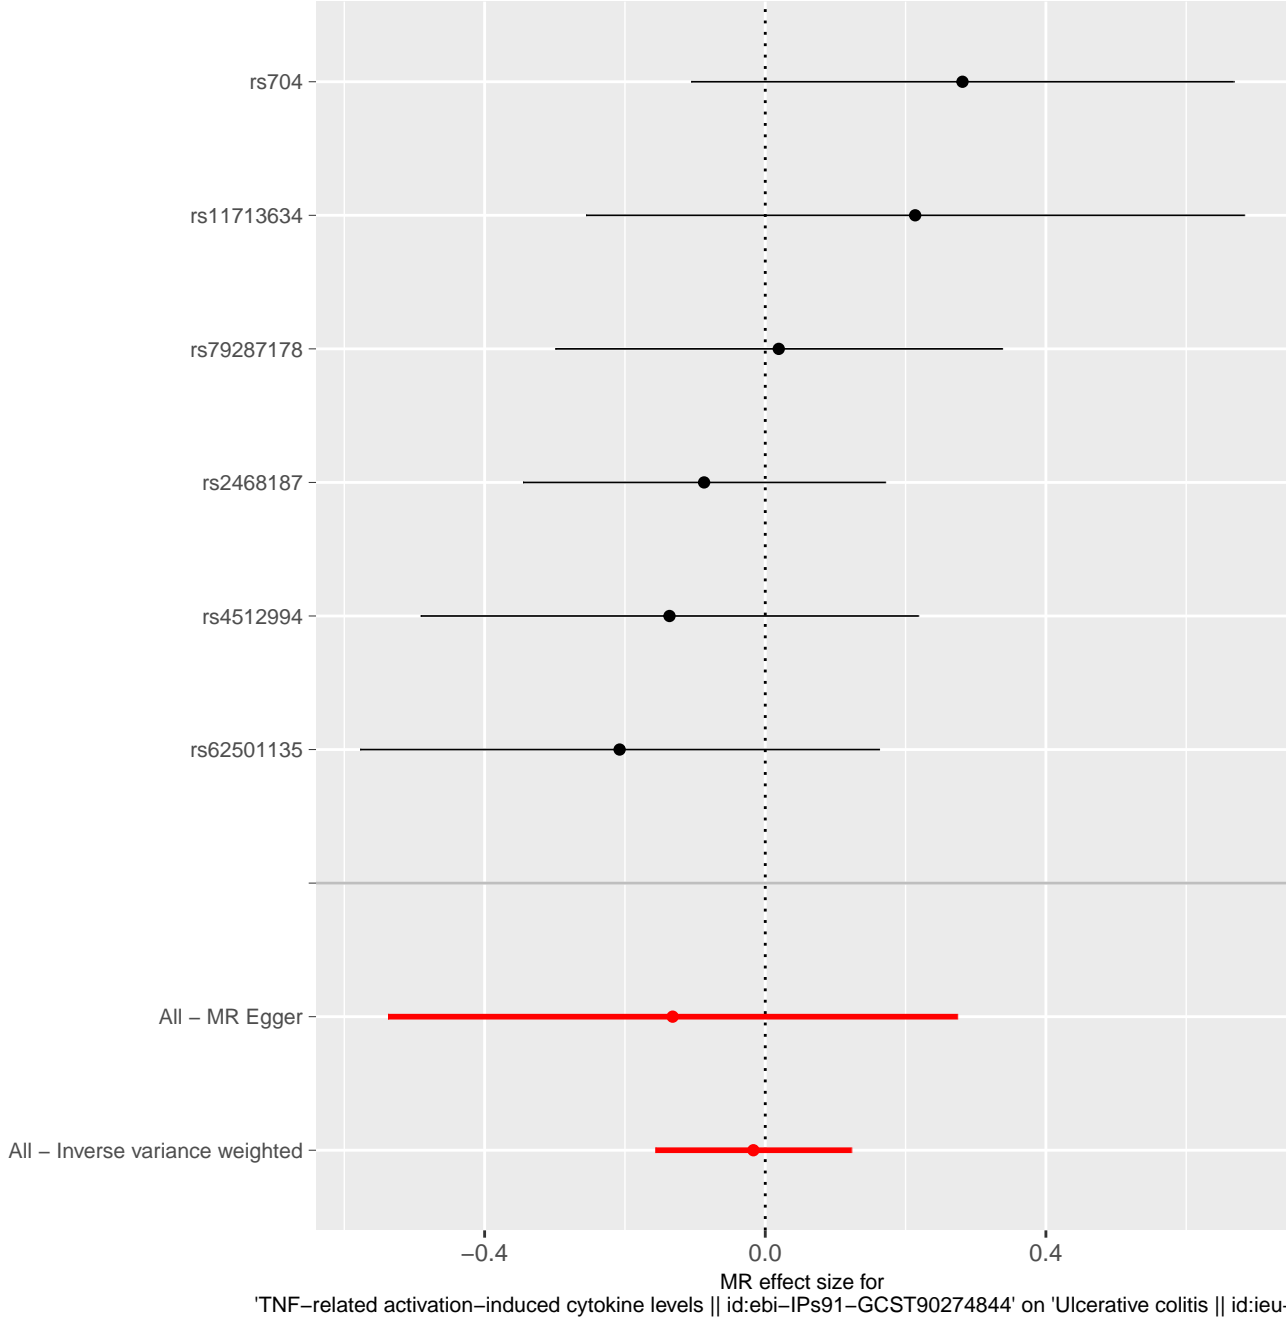

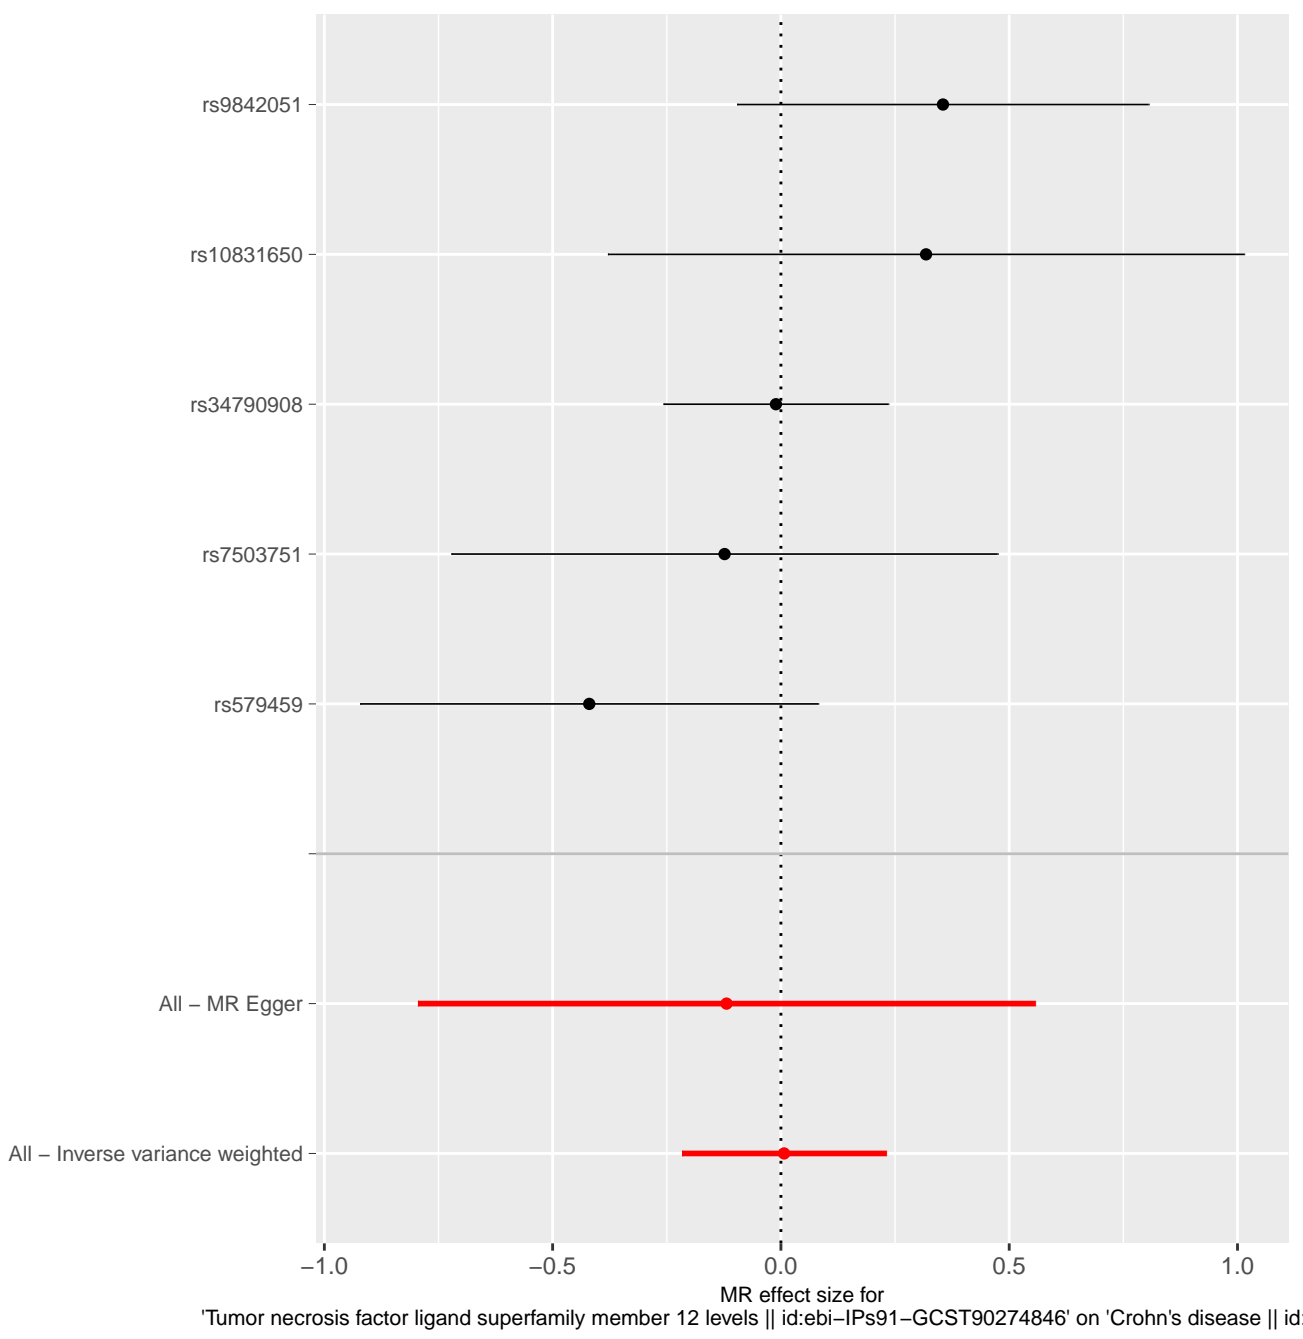

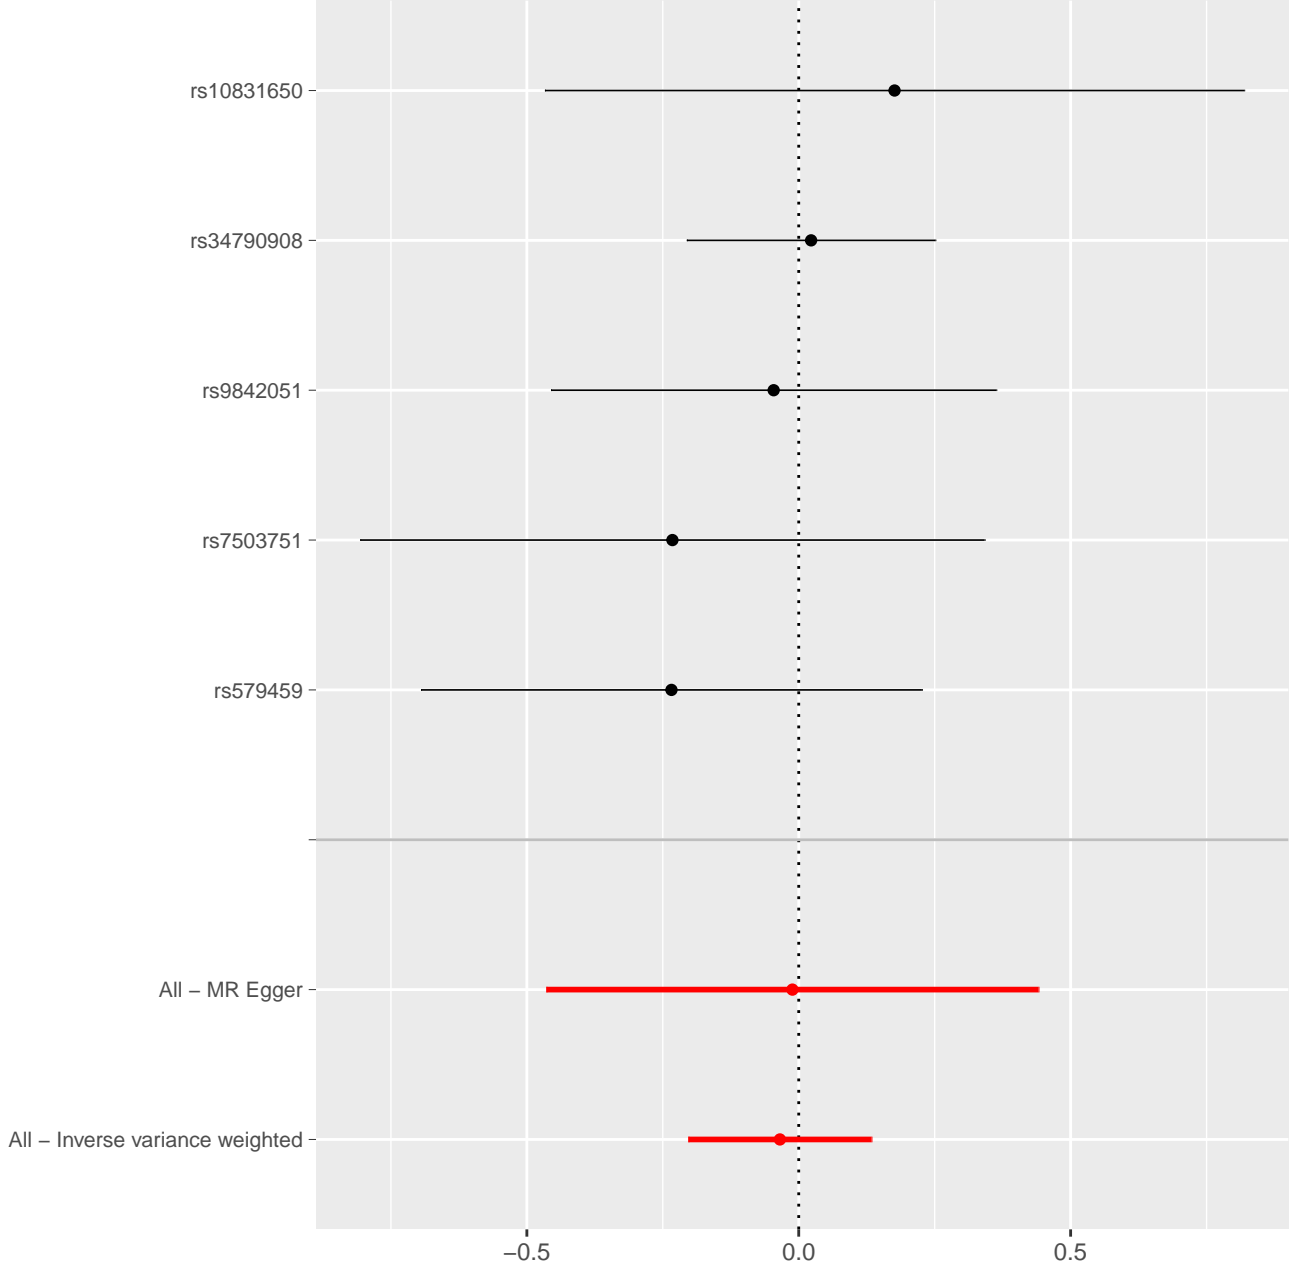

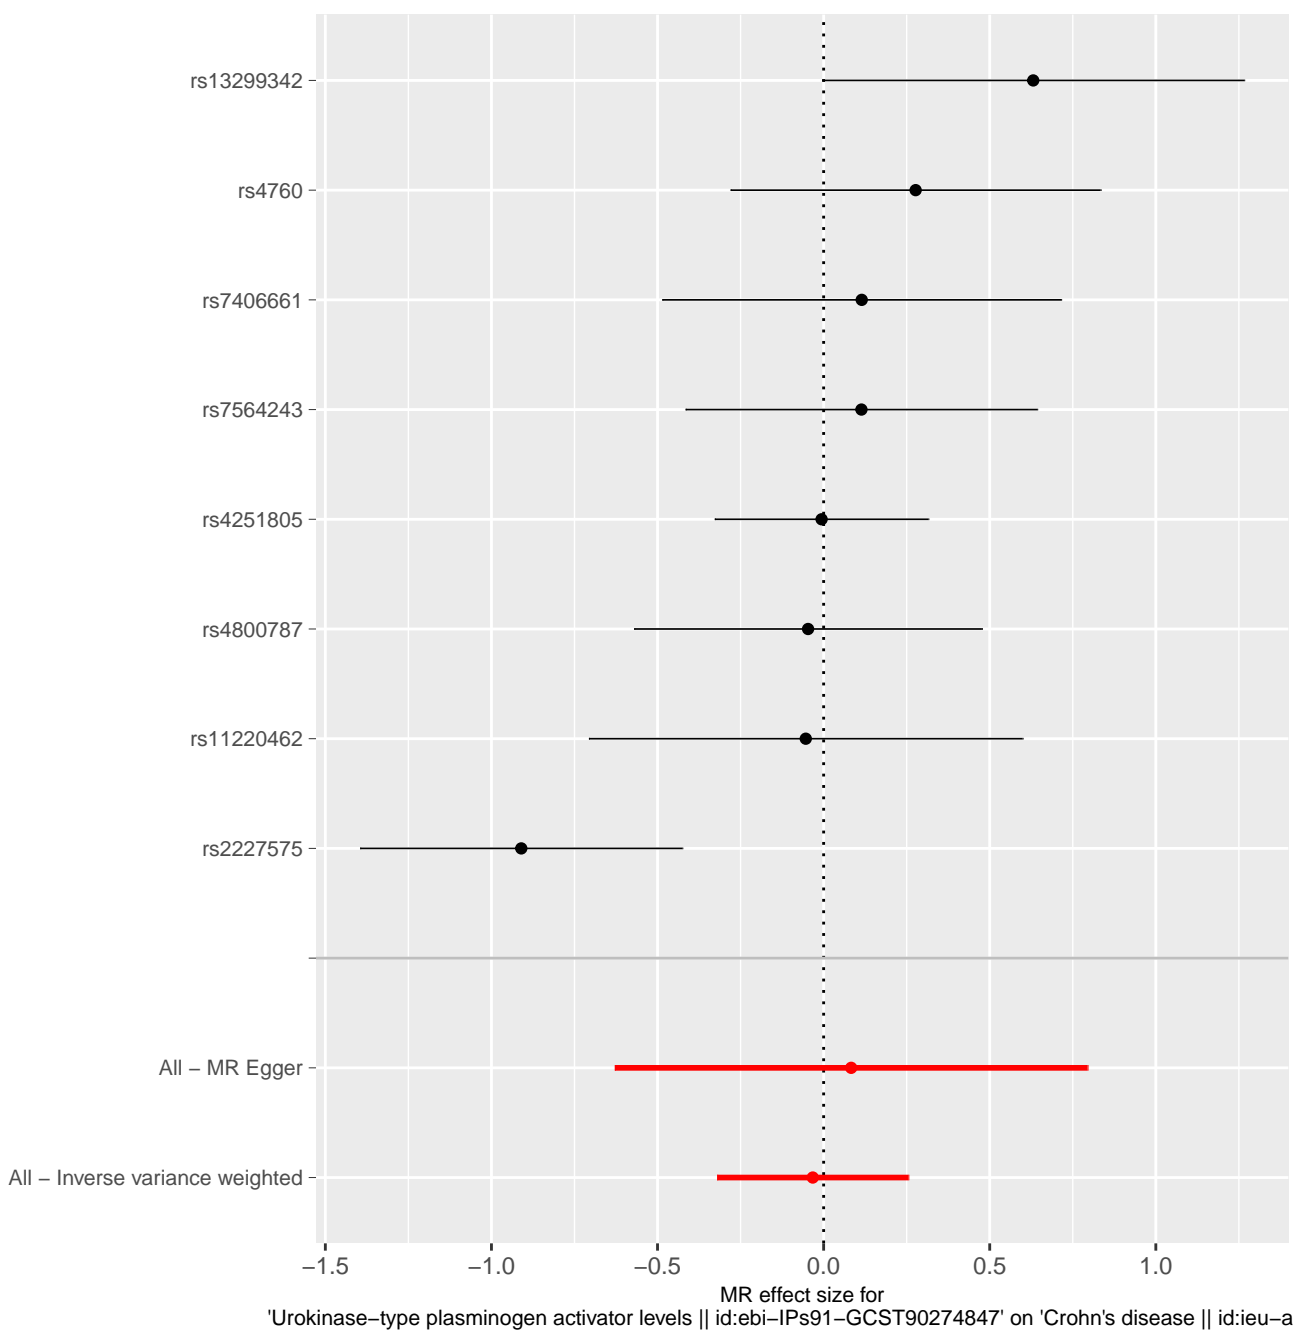

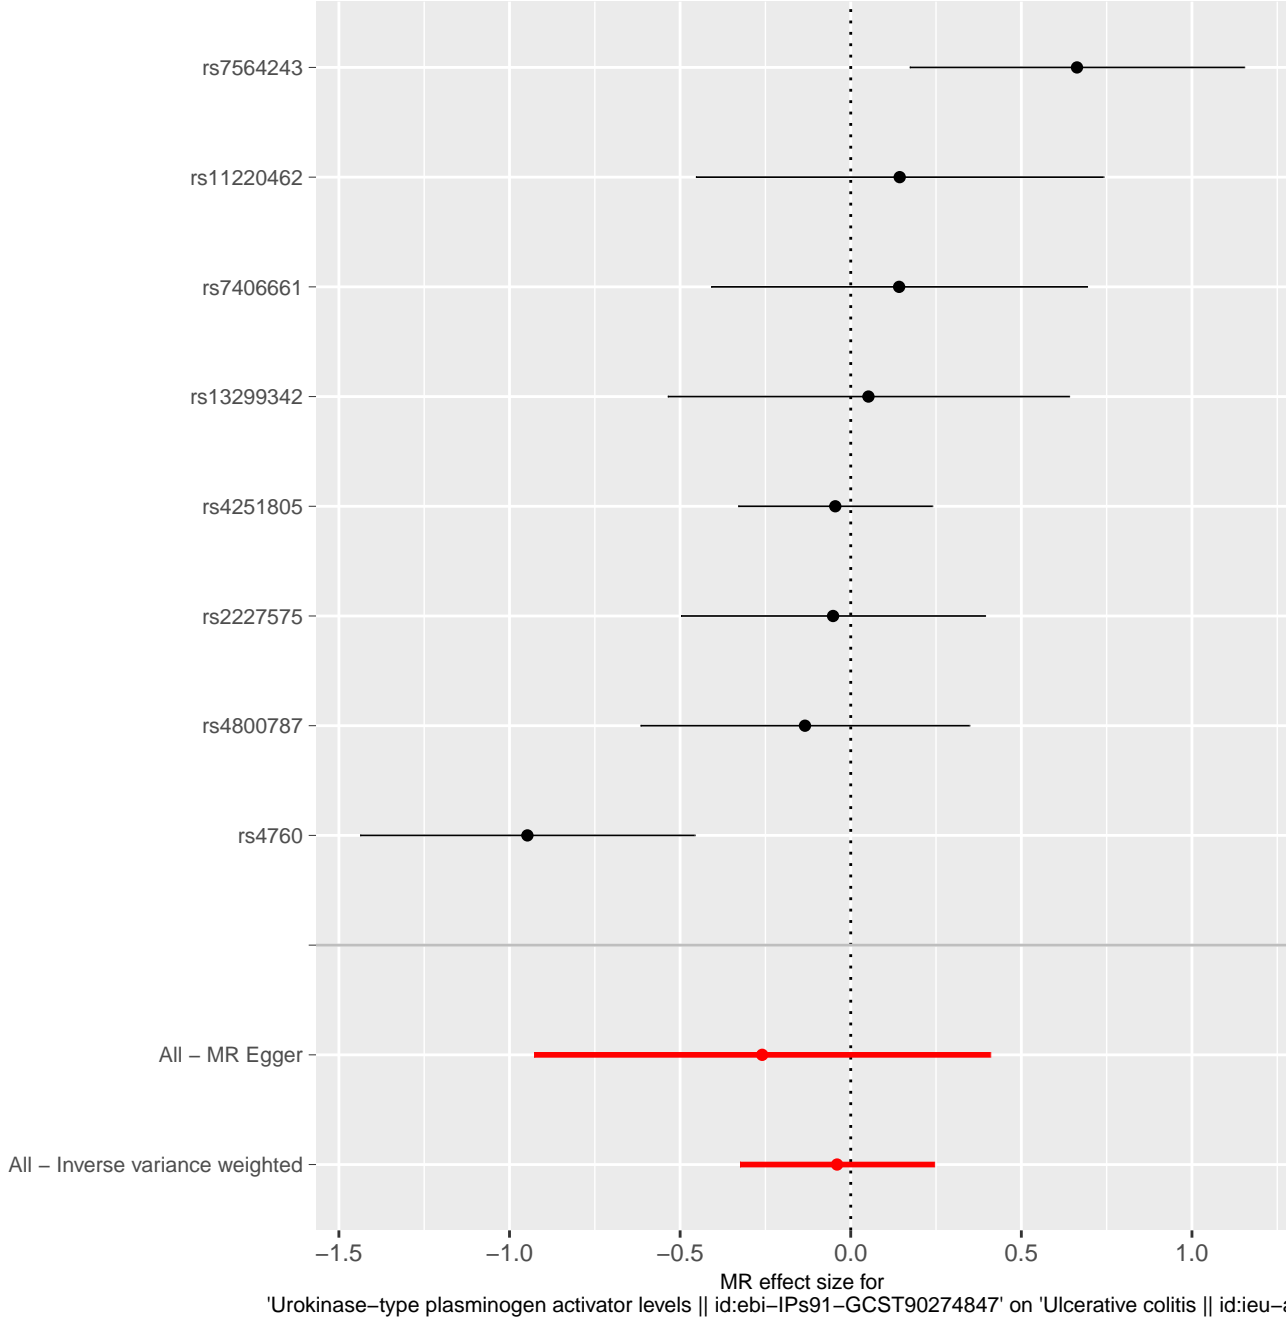



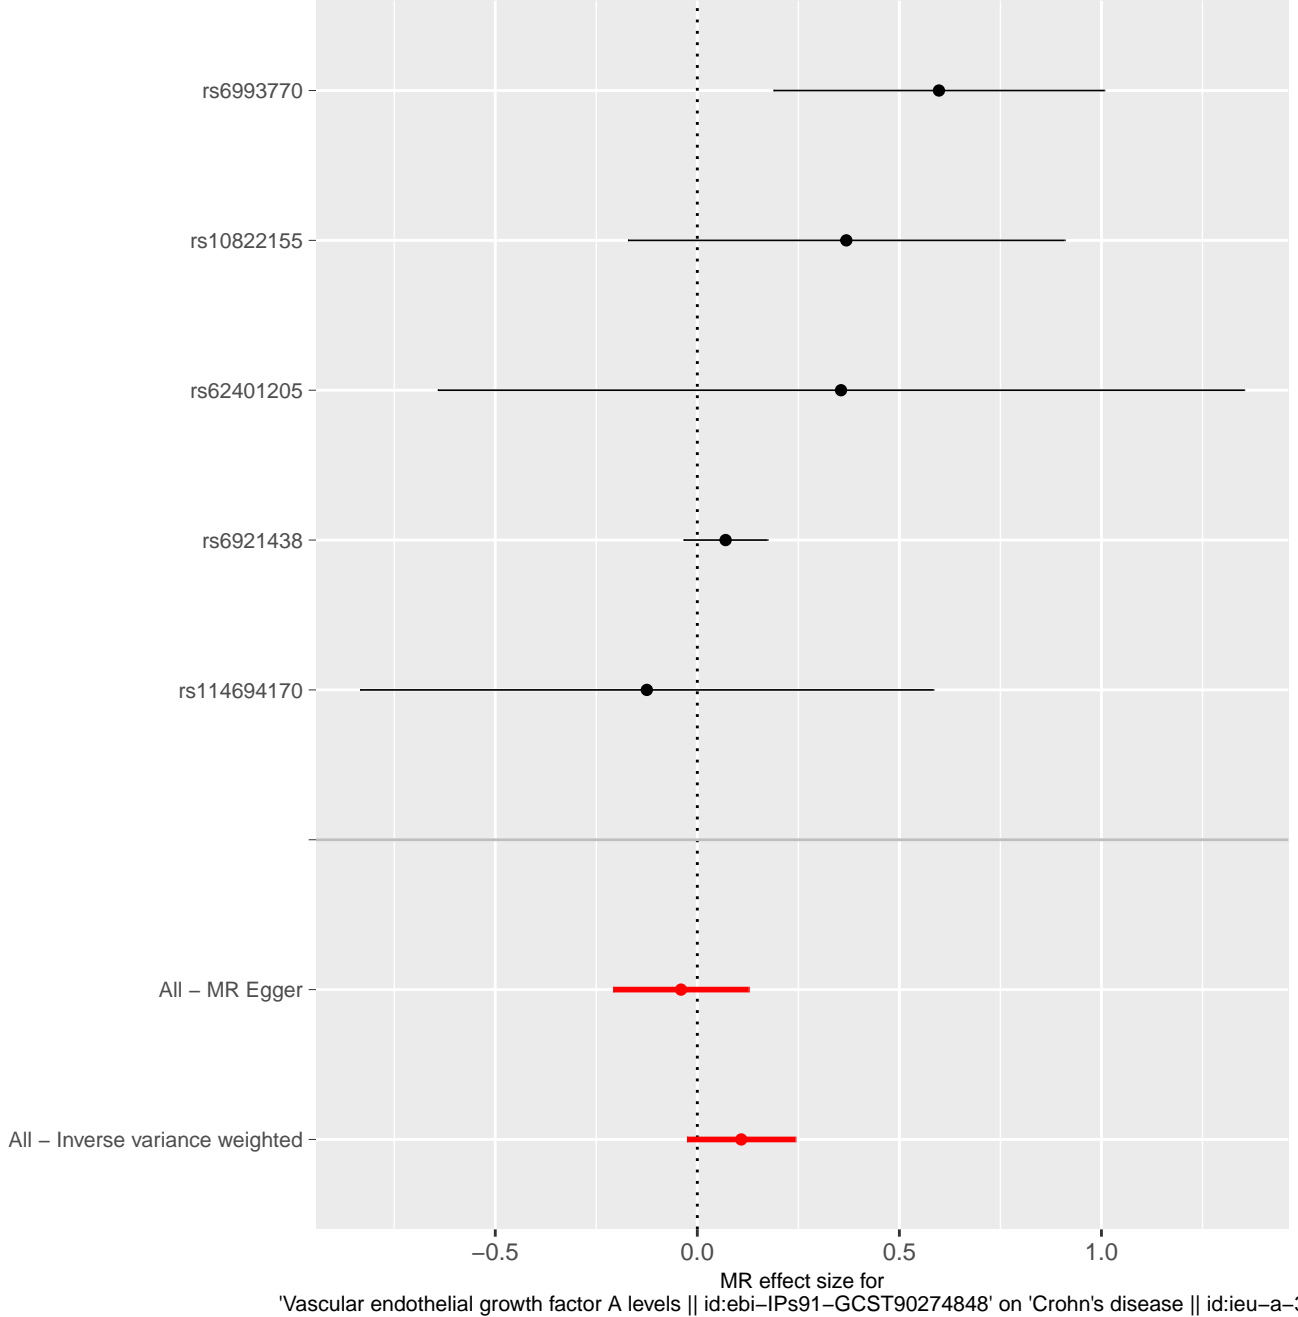

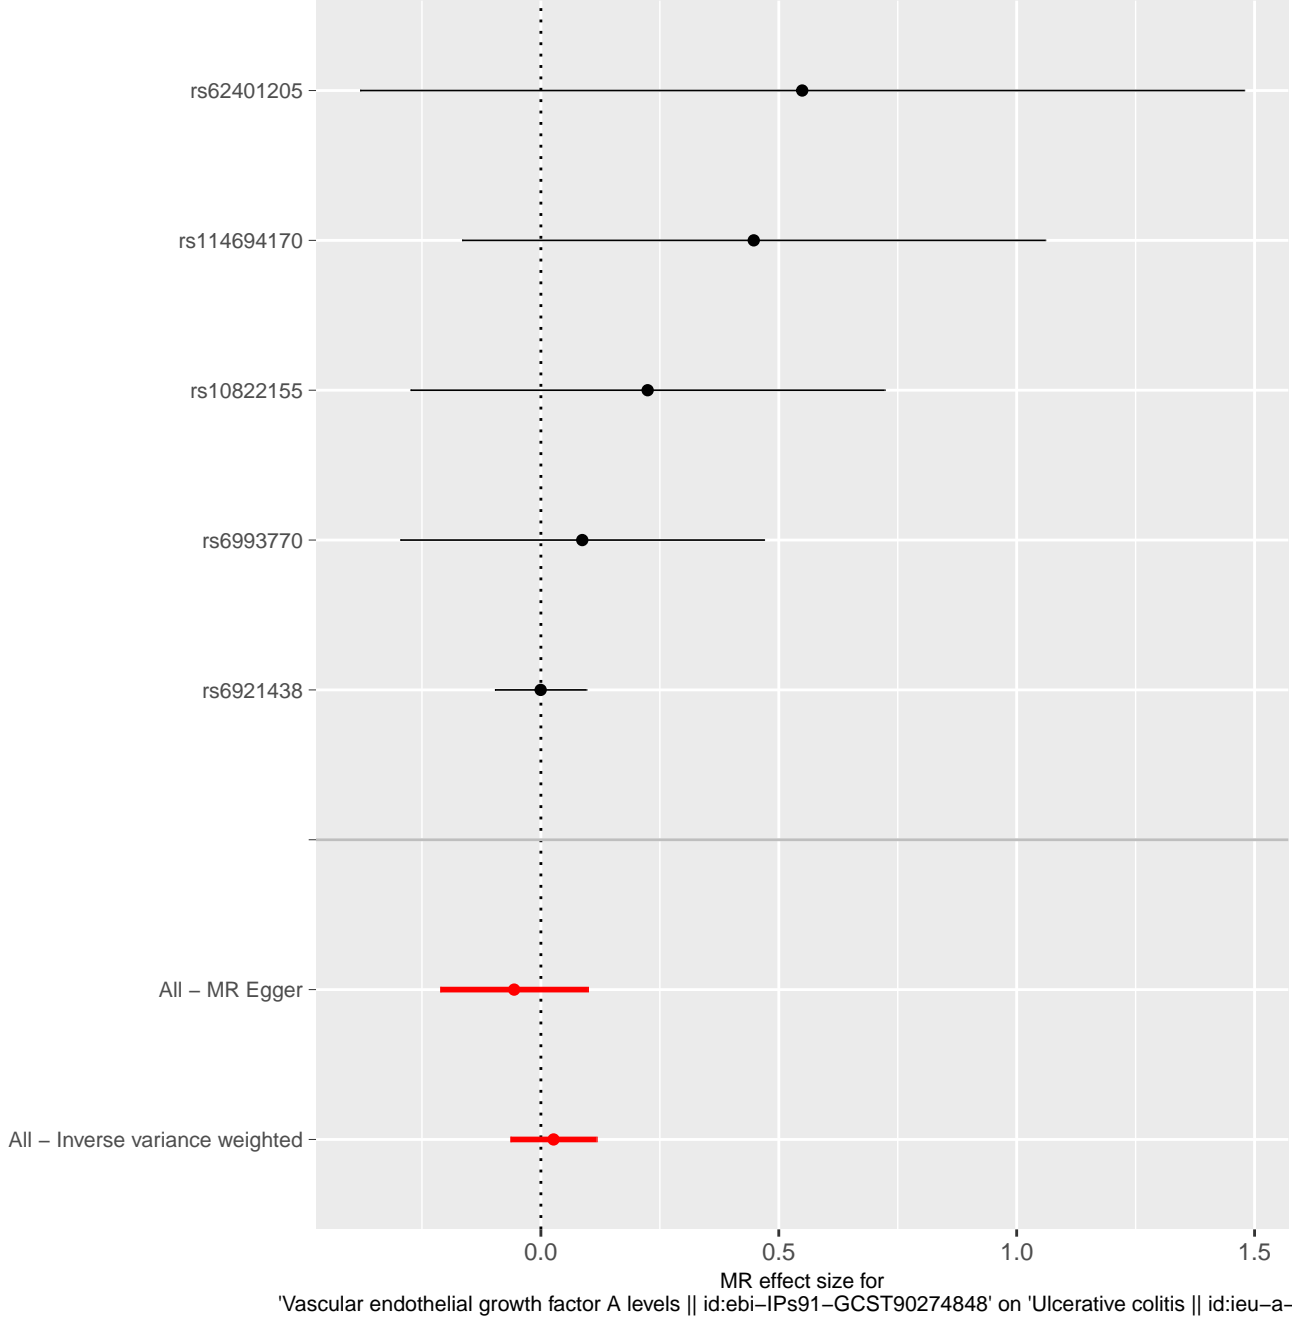

### MR Method

- Inverse variance weighted
- MR Egger

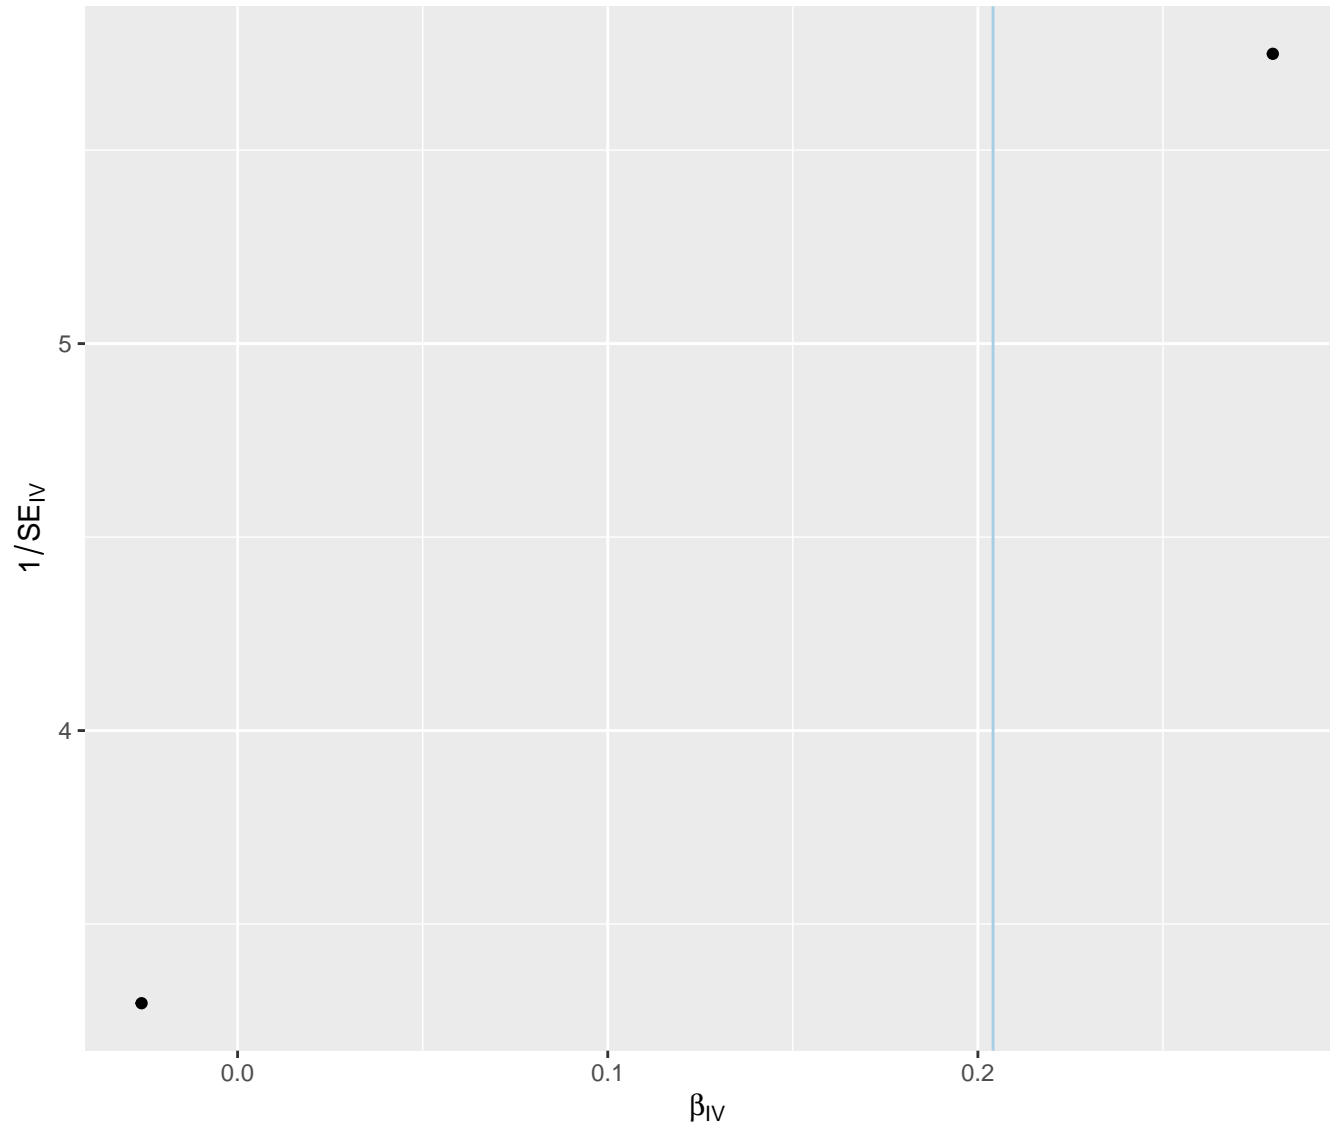

### MR Method

- Inverse variance weighted
- MR Egger

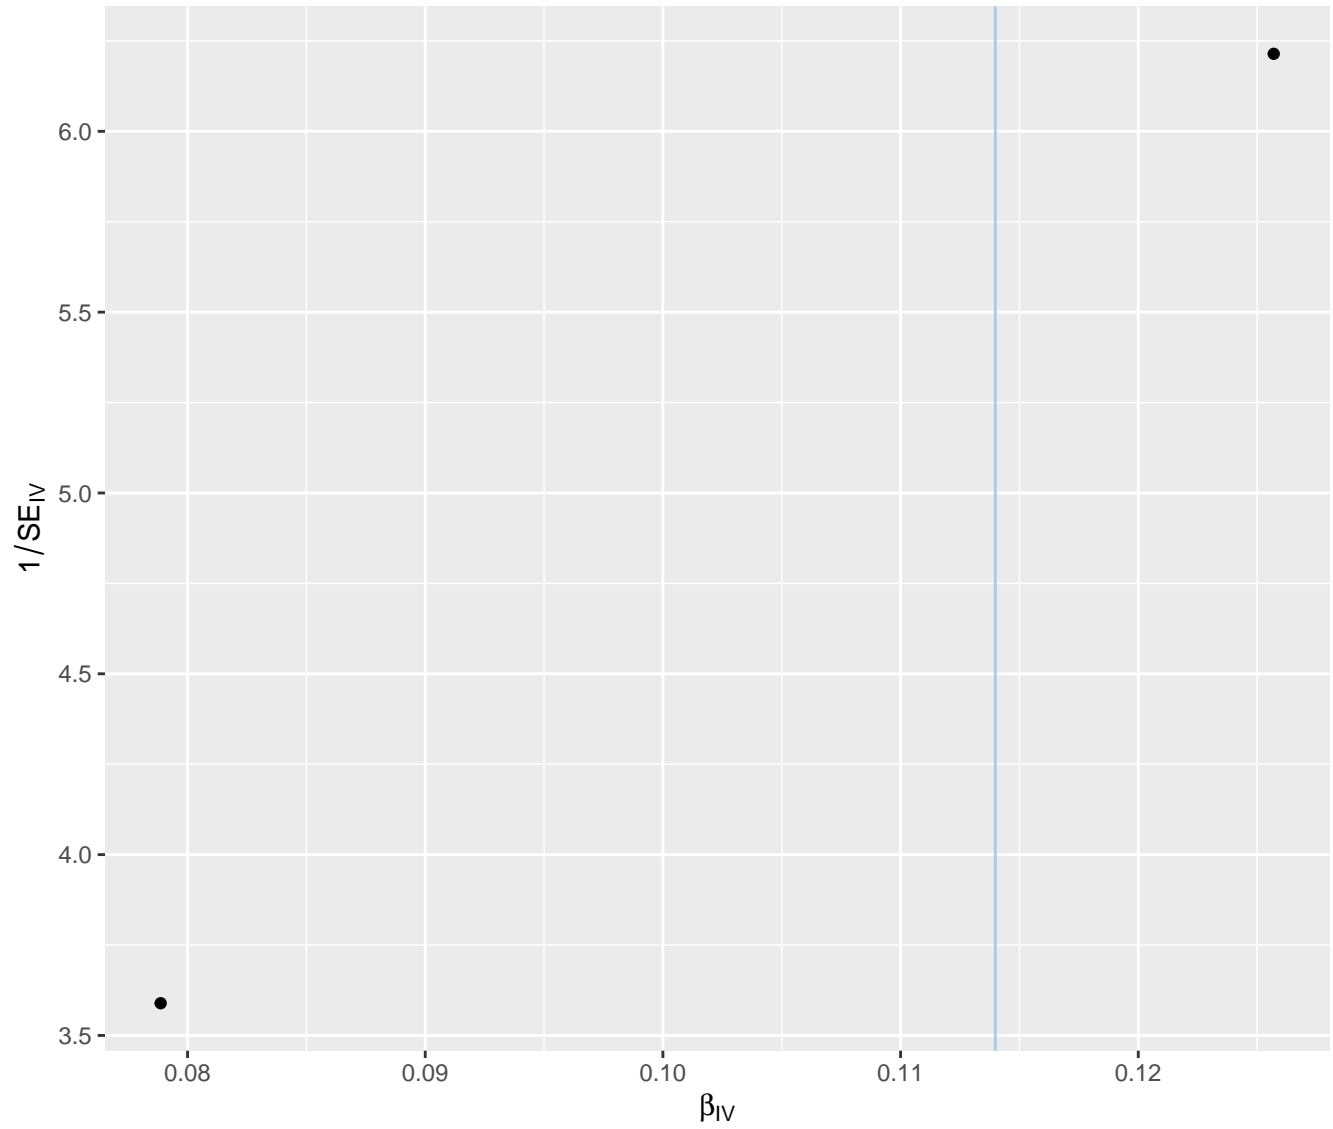

### MR Method

- Inverse variance weighted
- MR Egger

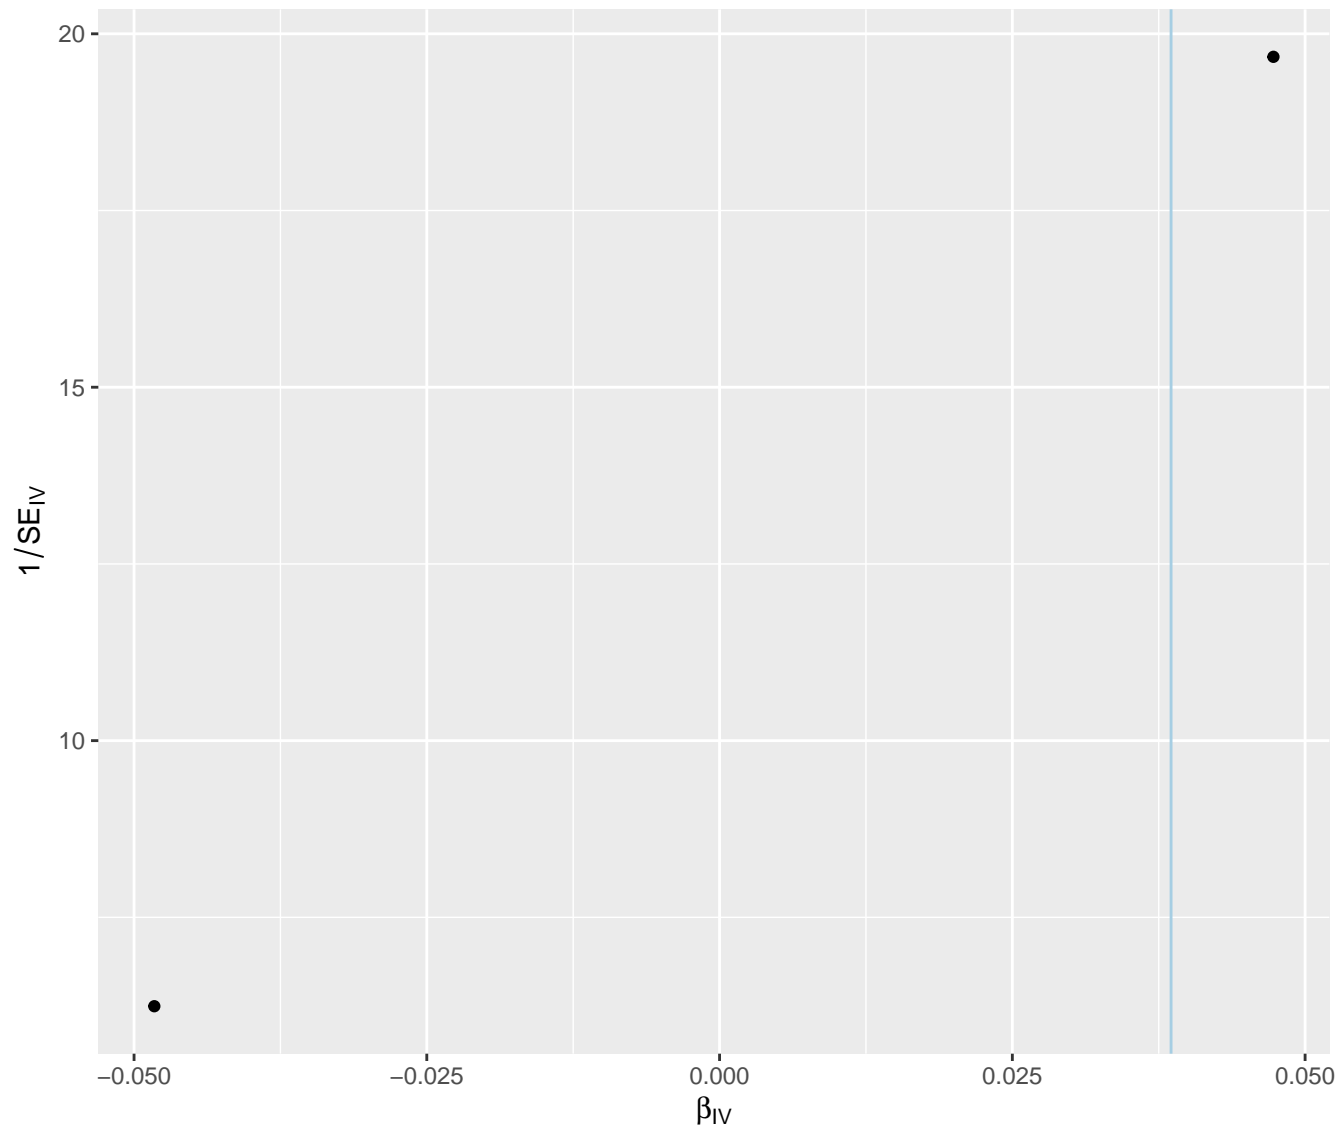

### MR Method

- Inverse variance weighted
- MR Egger

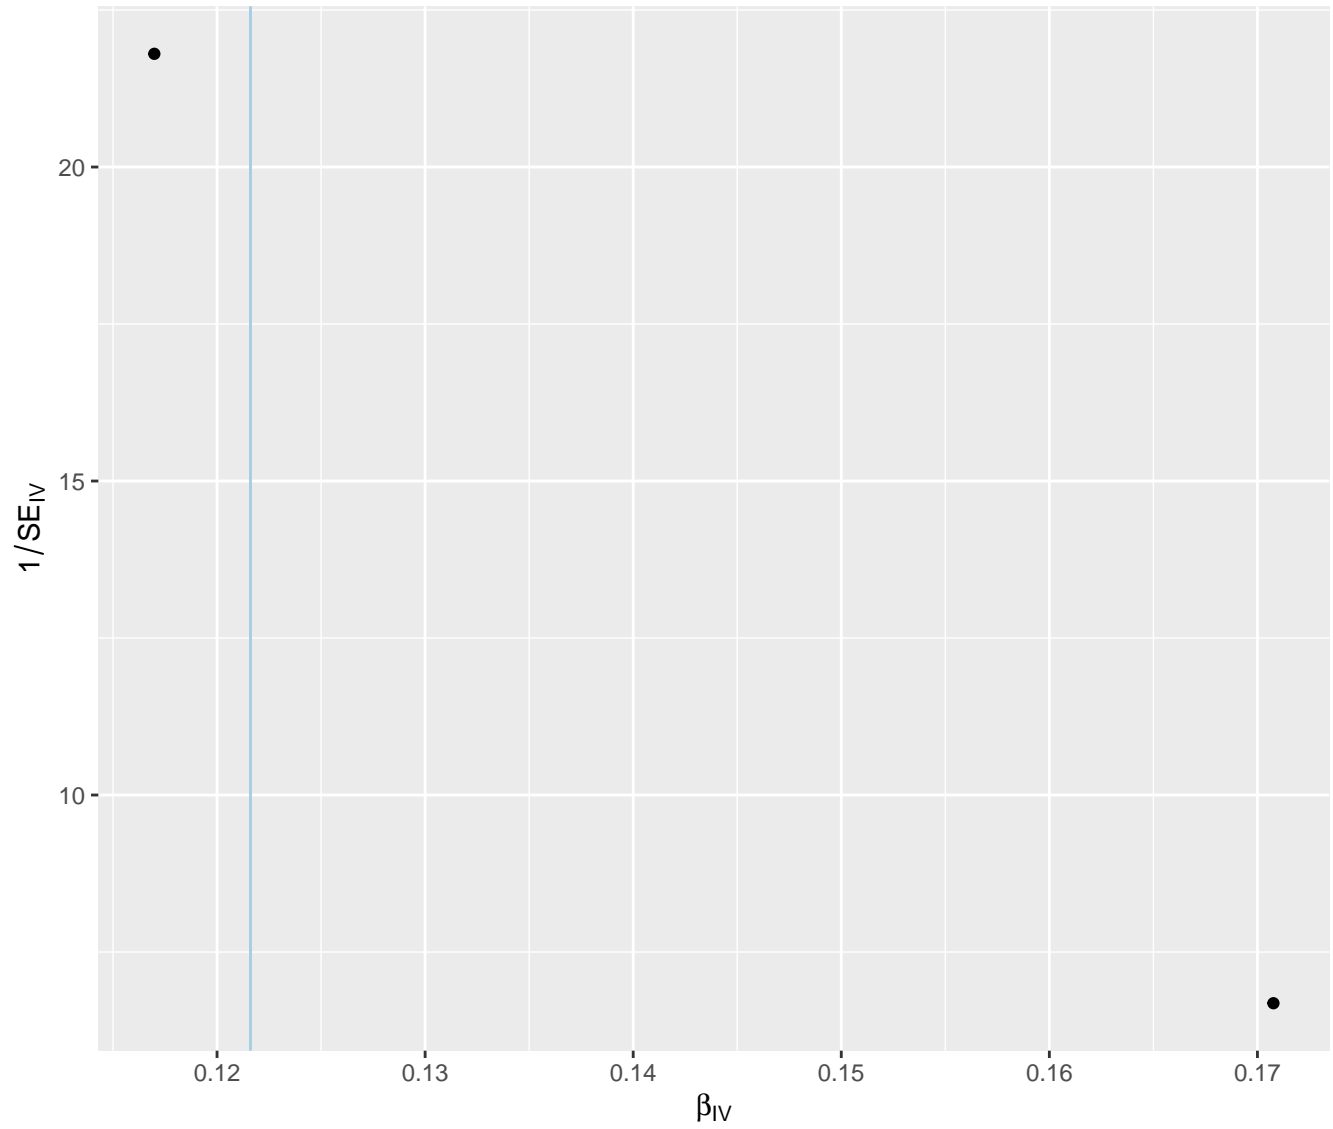

### MR Method

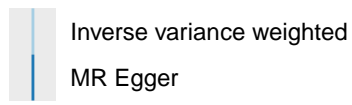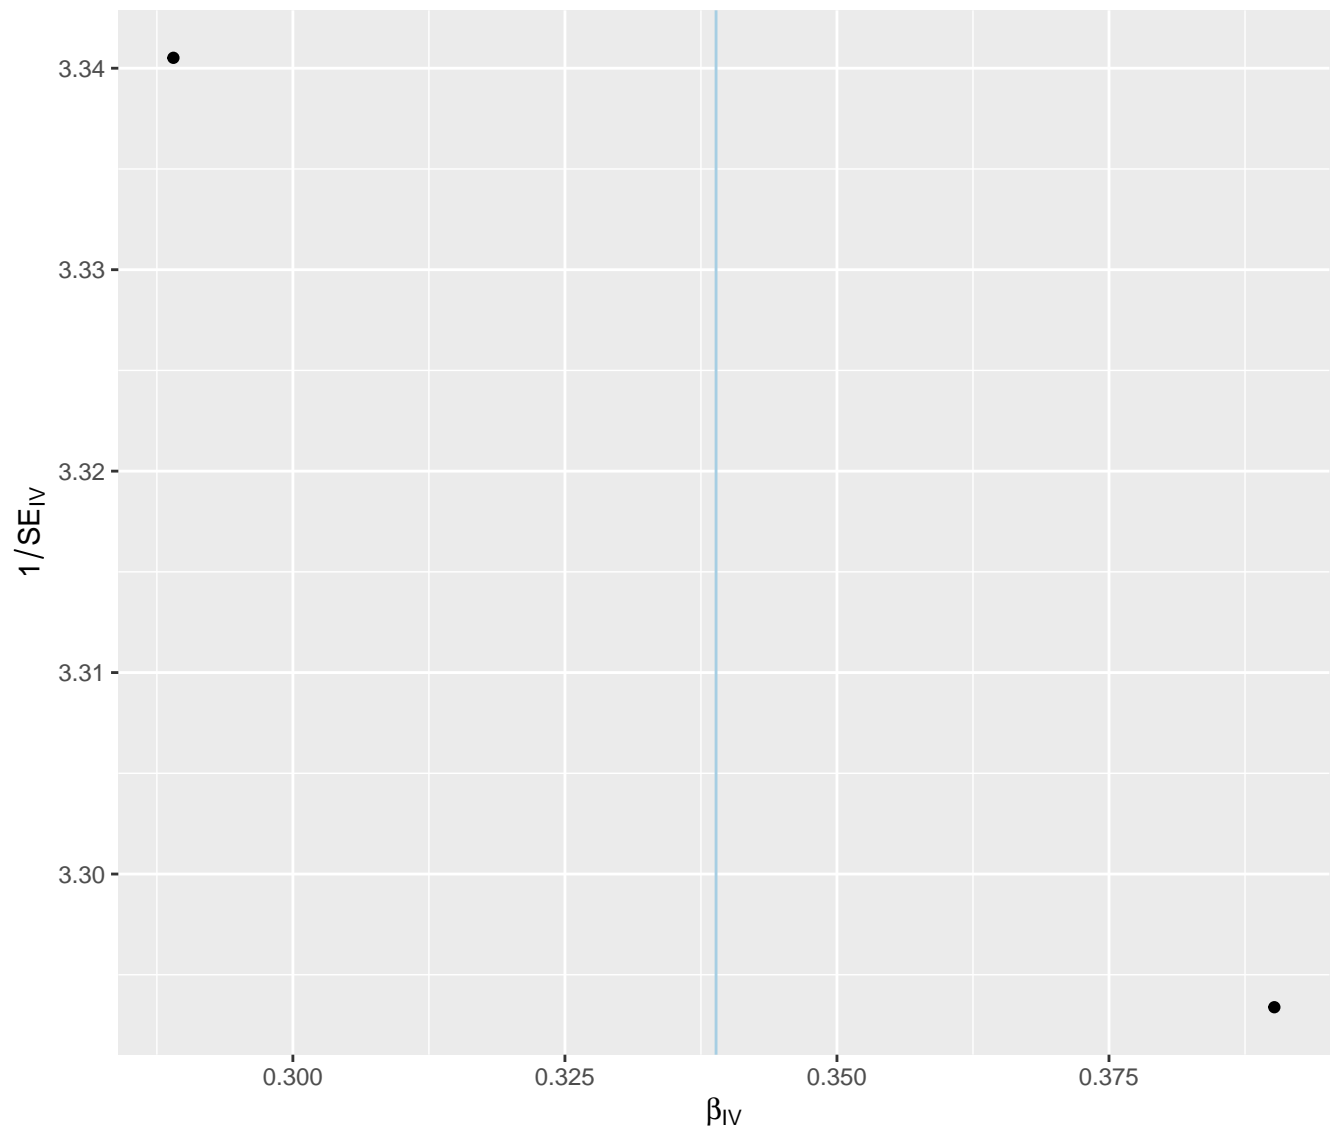

### MR Method

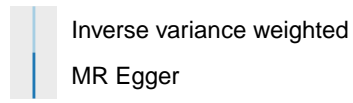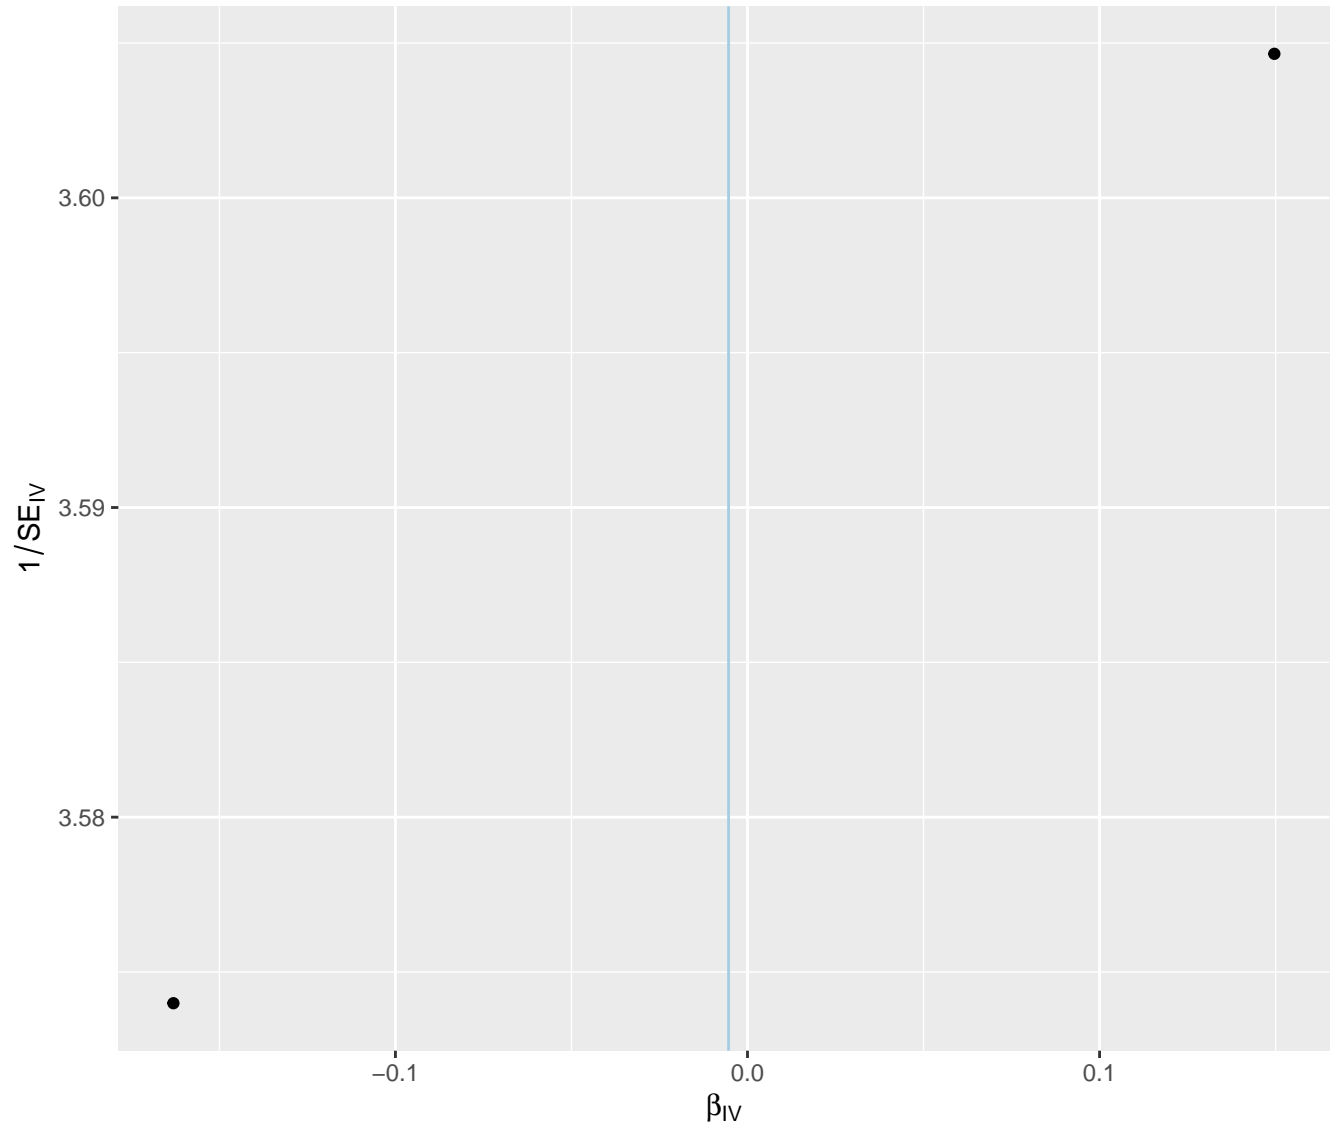



### MR Method

- Inverse variance weighted
- MR Egger

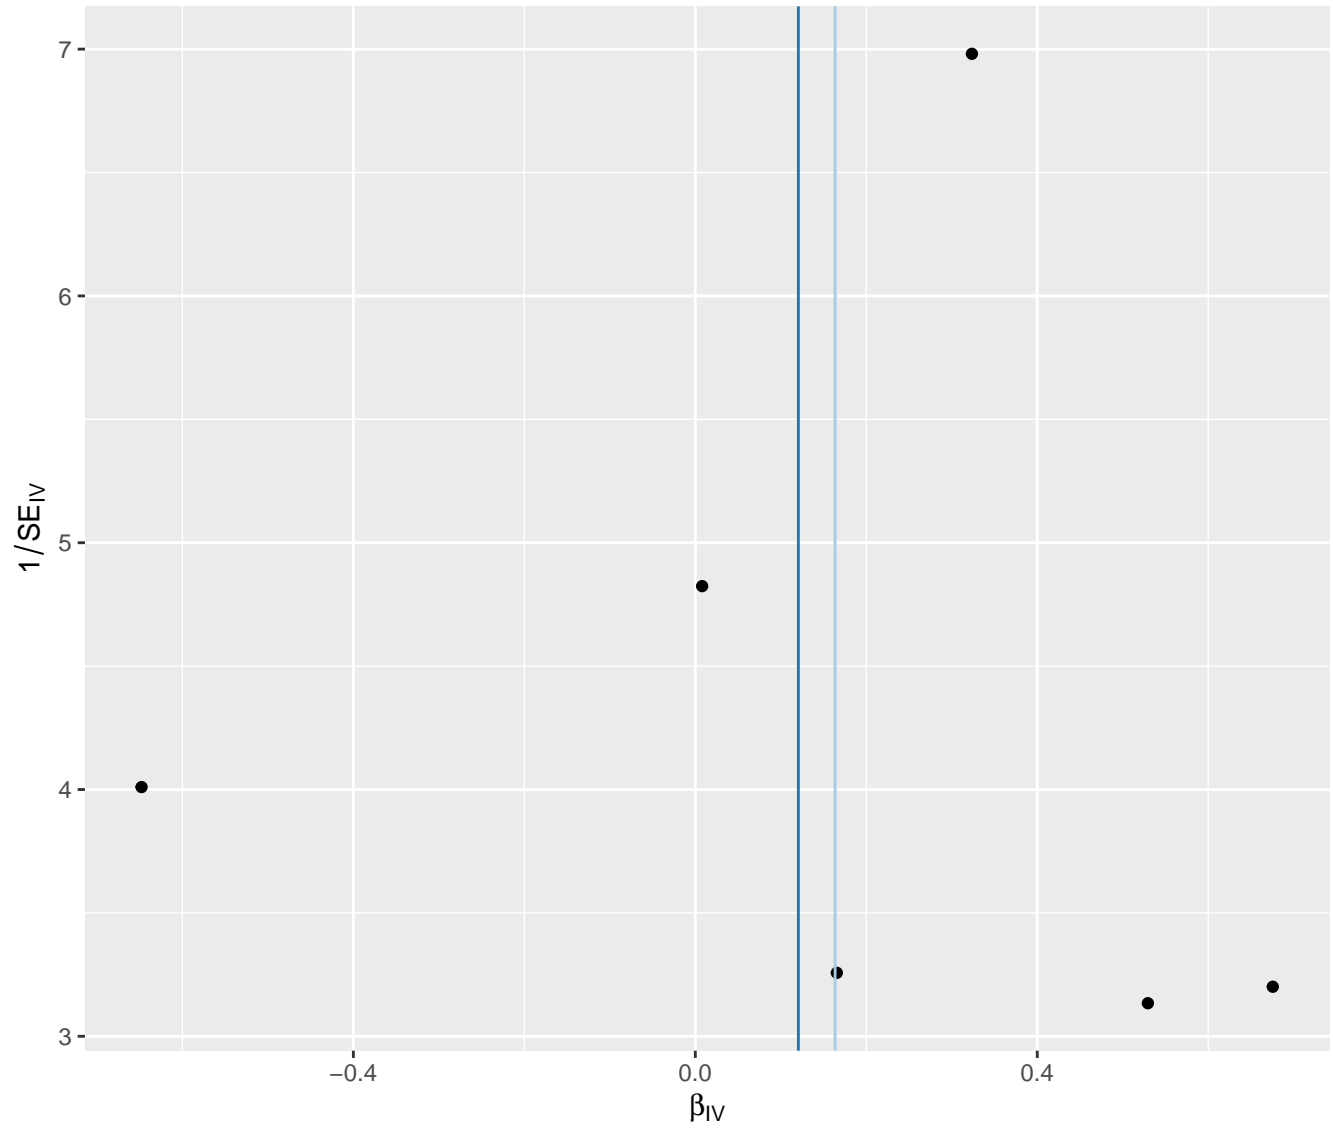

### MR Method

- Inverse variance weighted
- MR Egger

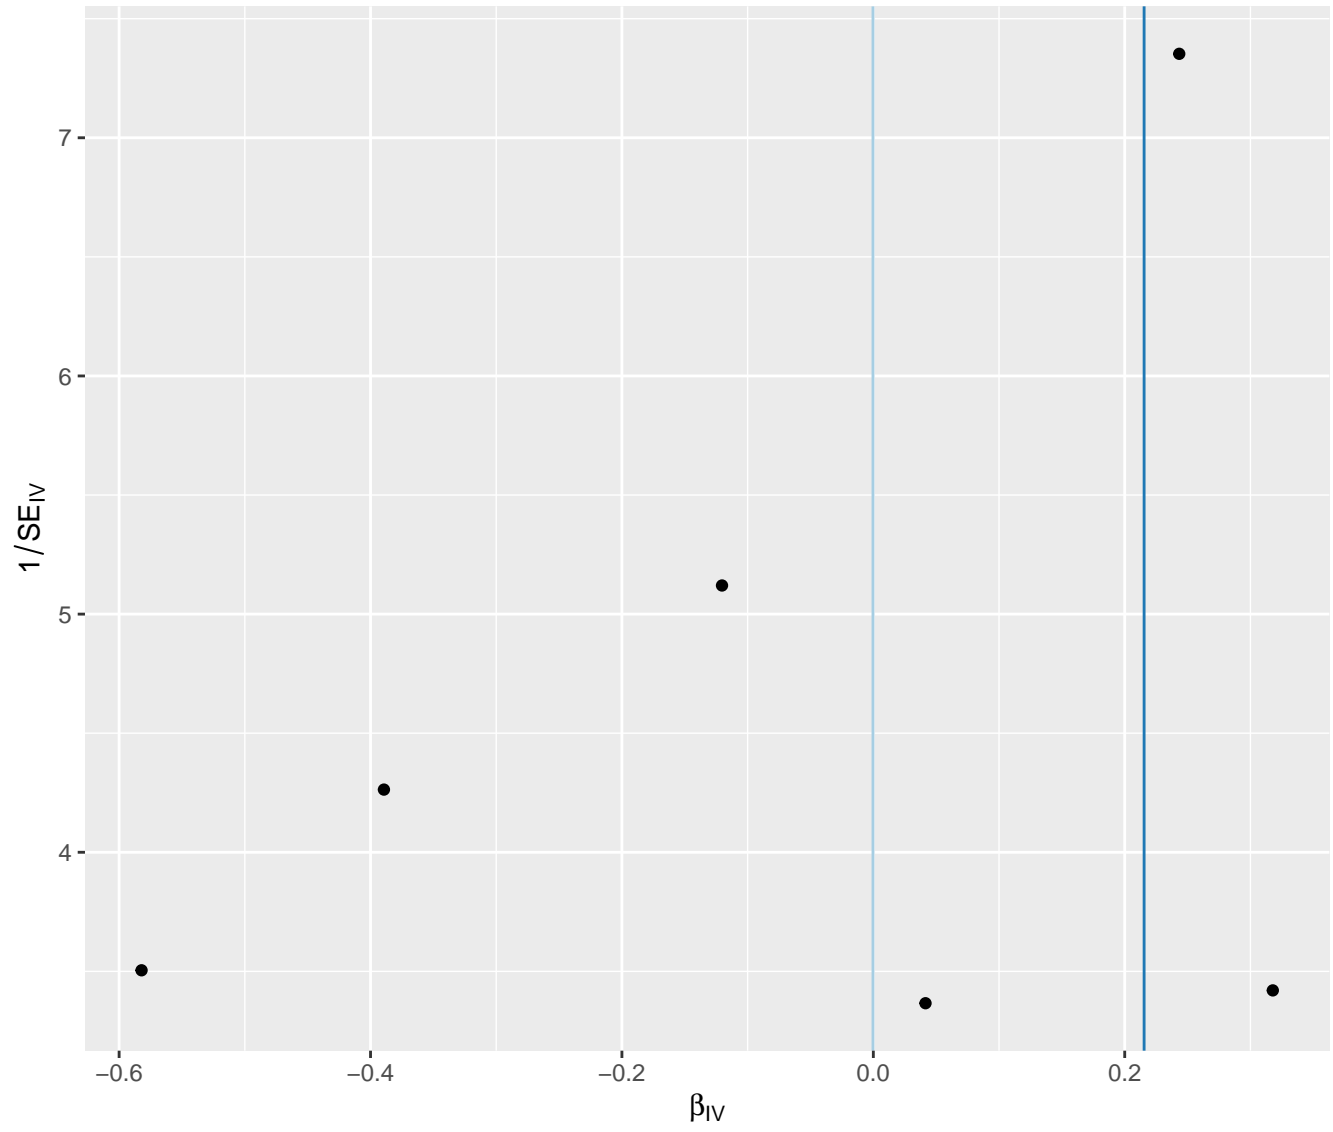

### MR Method

- Inverse variance weighted
- MR Egger

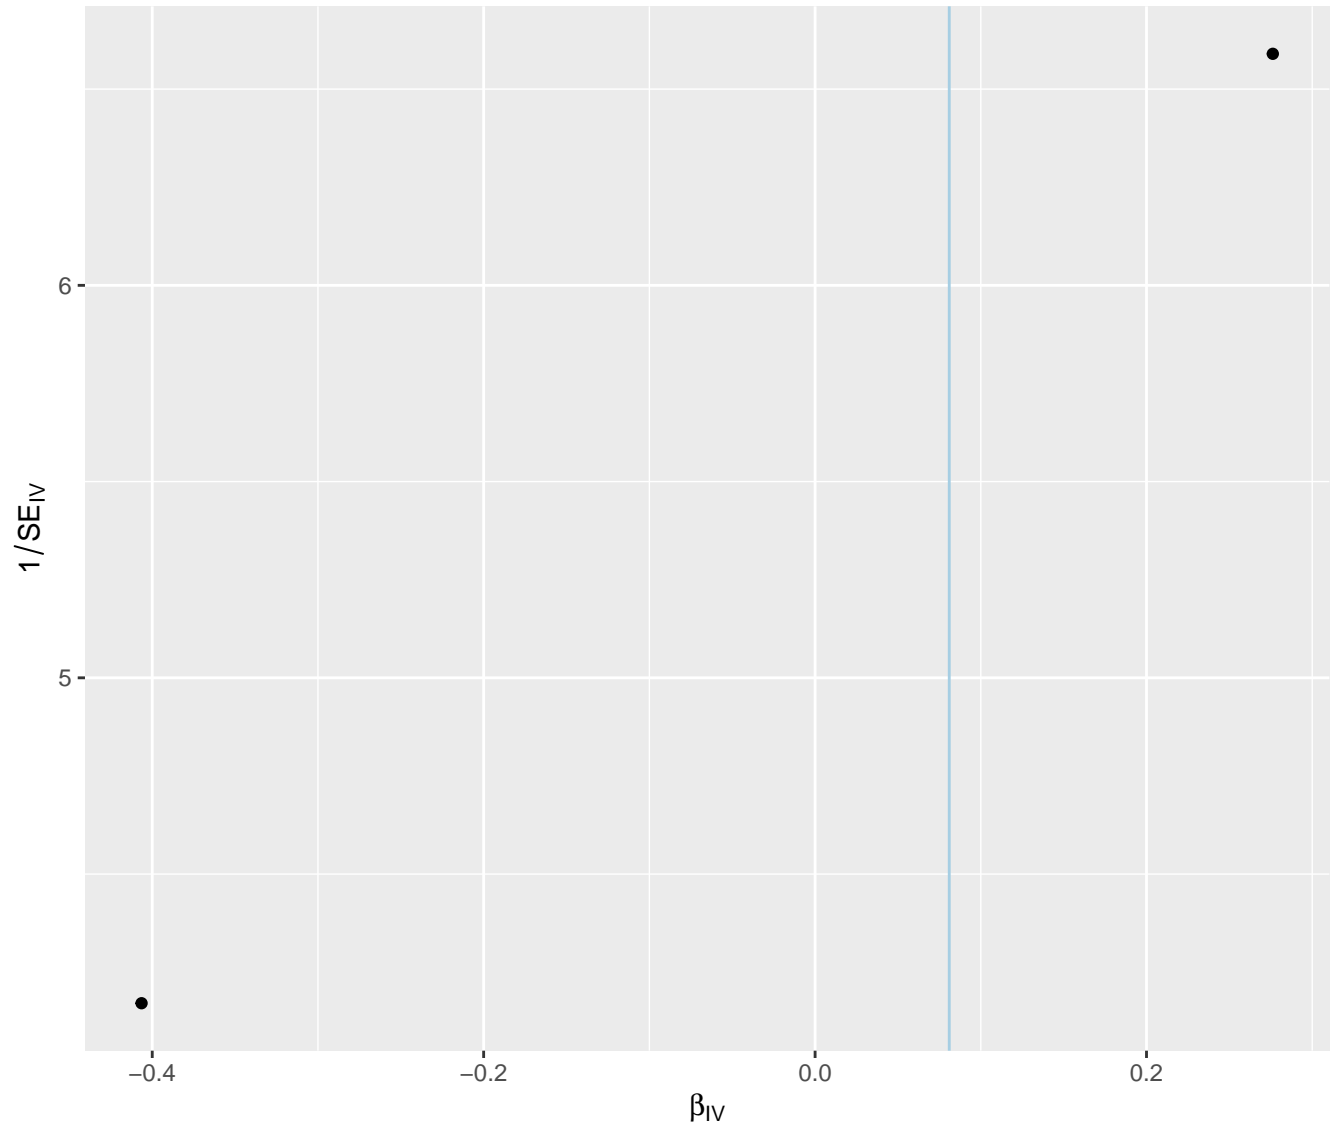

### MR Method

- Inverse variance weighted
- MR Egger

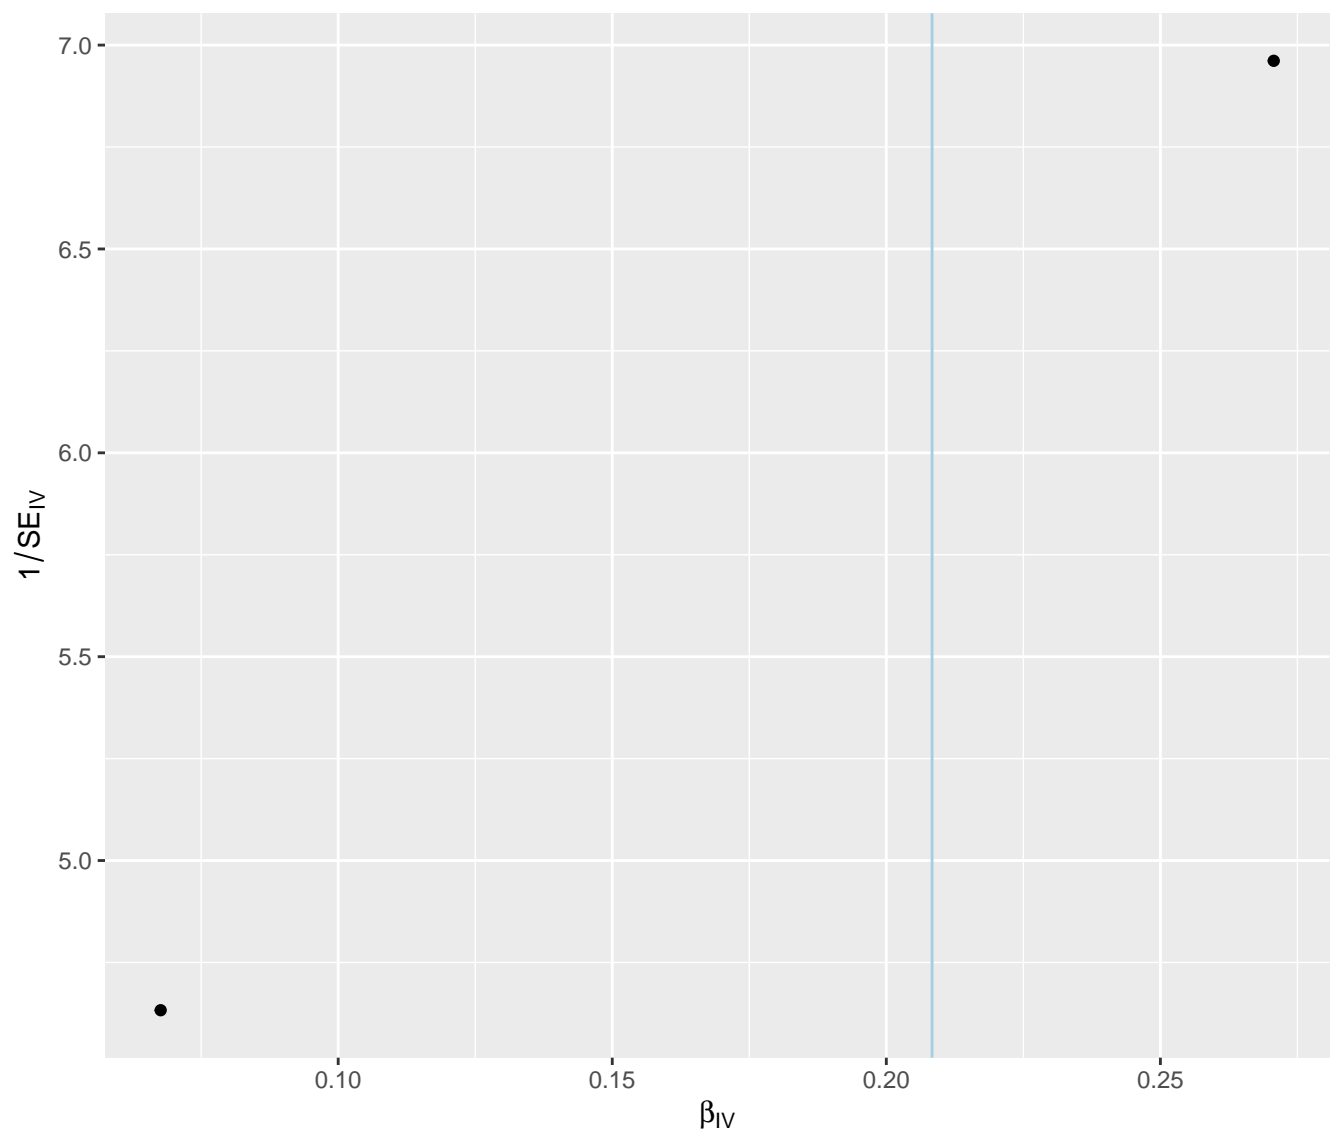

### MR Method

- Inverse variance weighted
- MR Egger

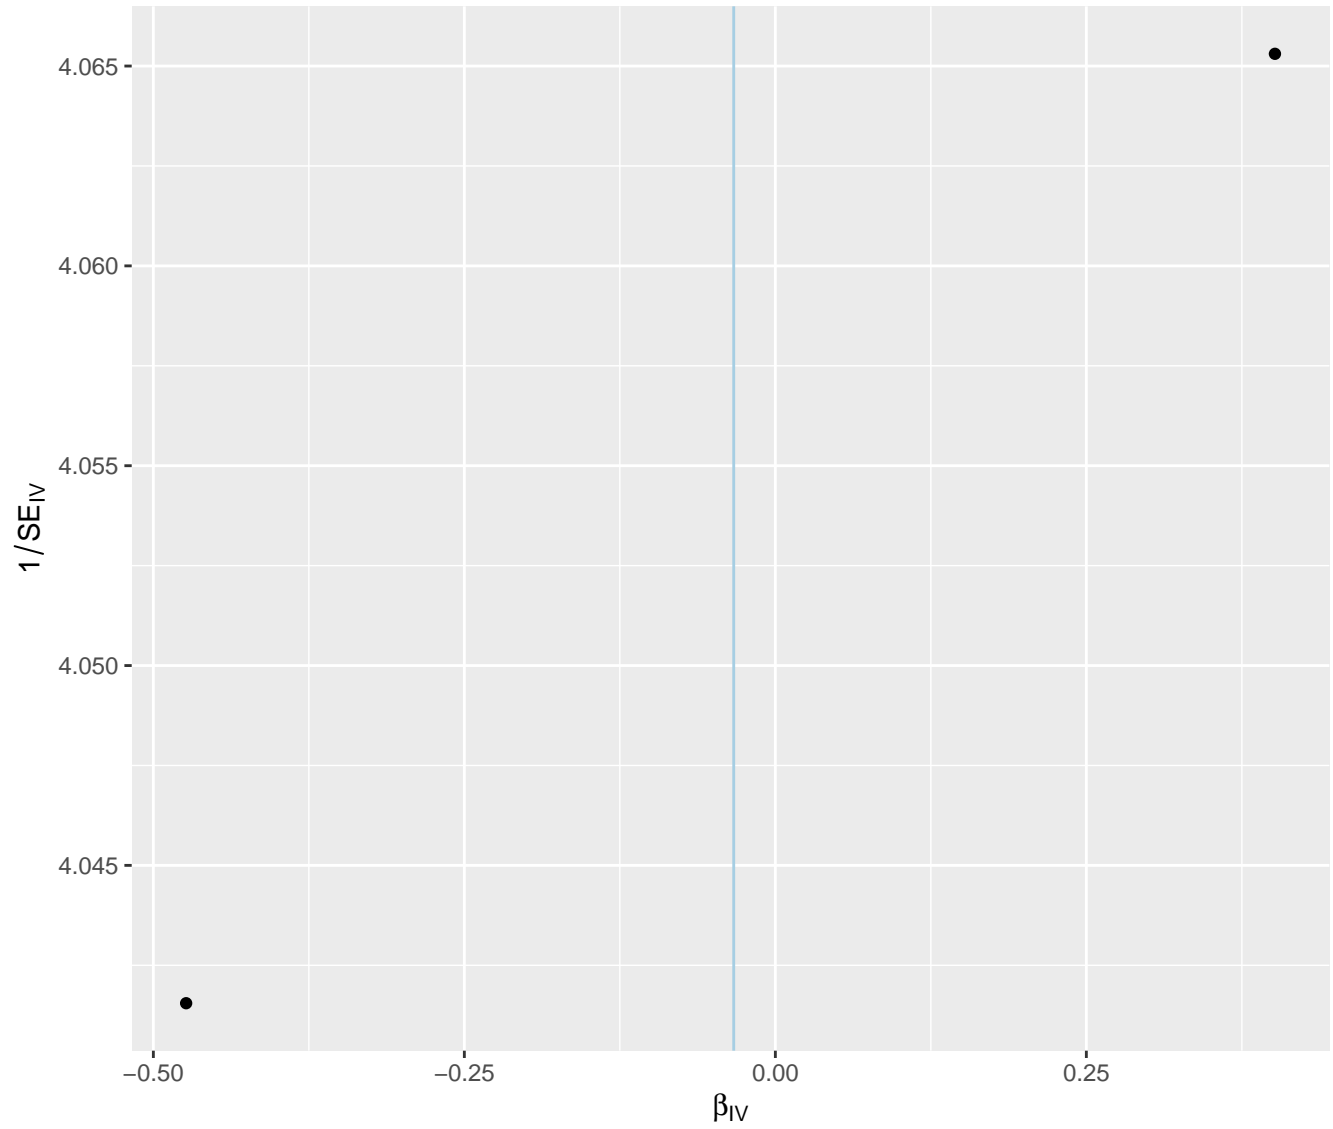

### MR Method

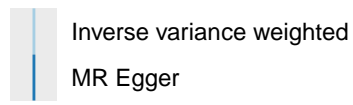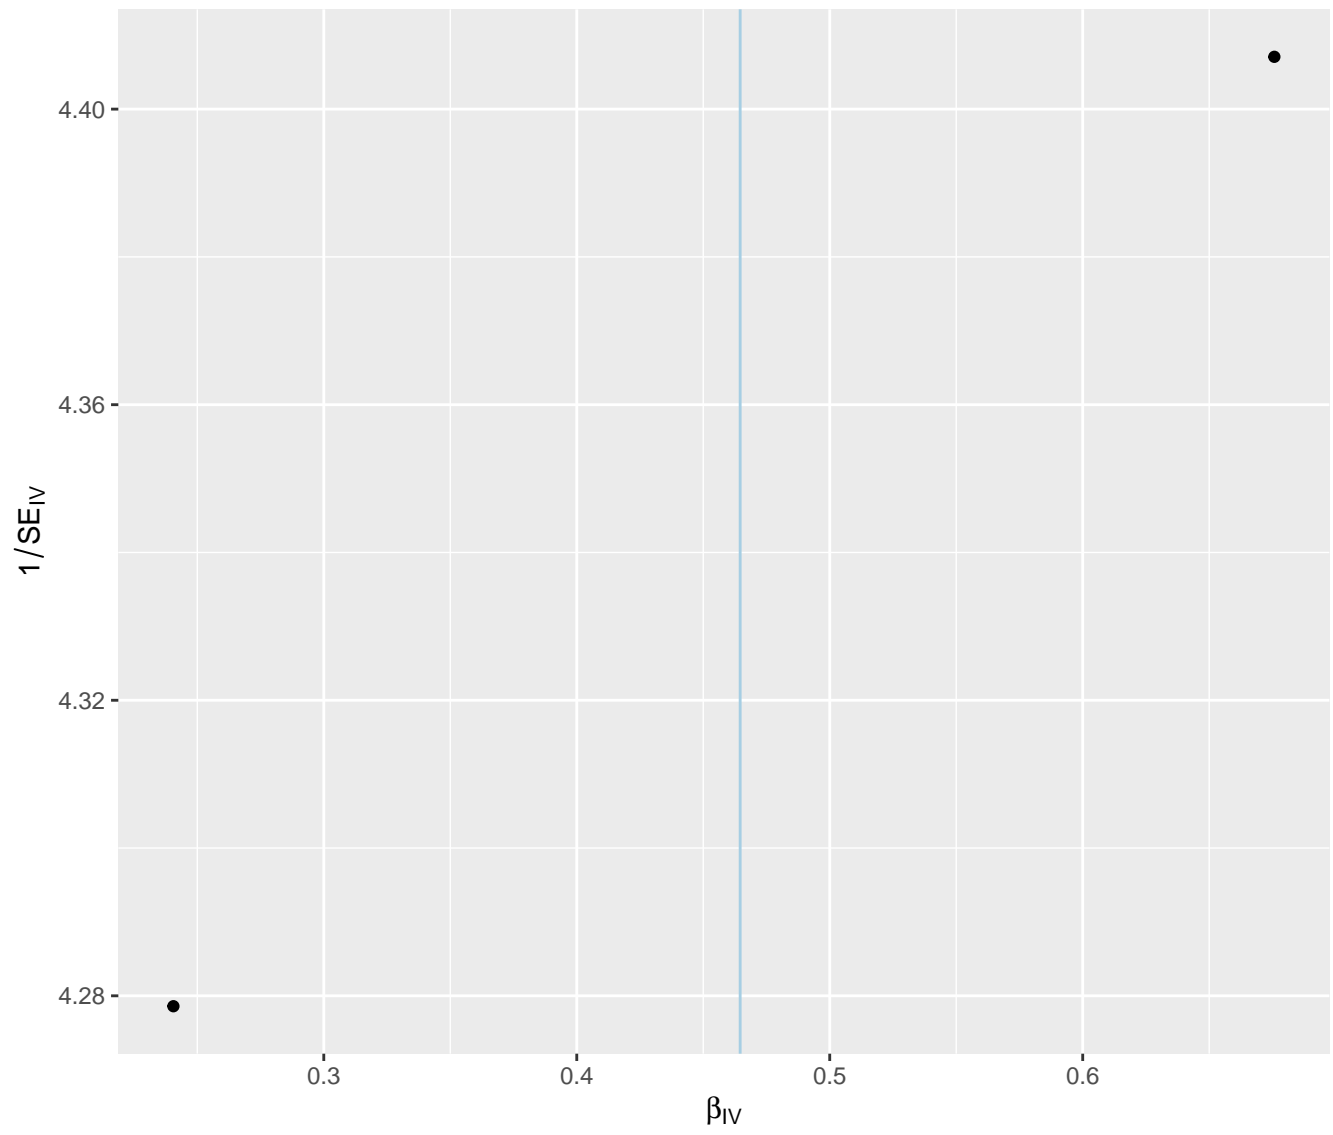

### MR Method

- Inverse variance weighted
- MR Egger

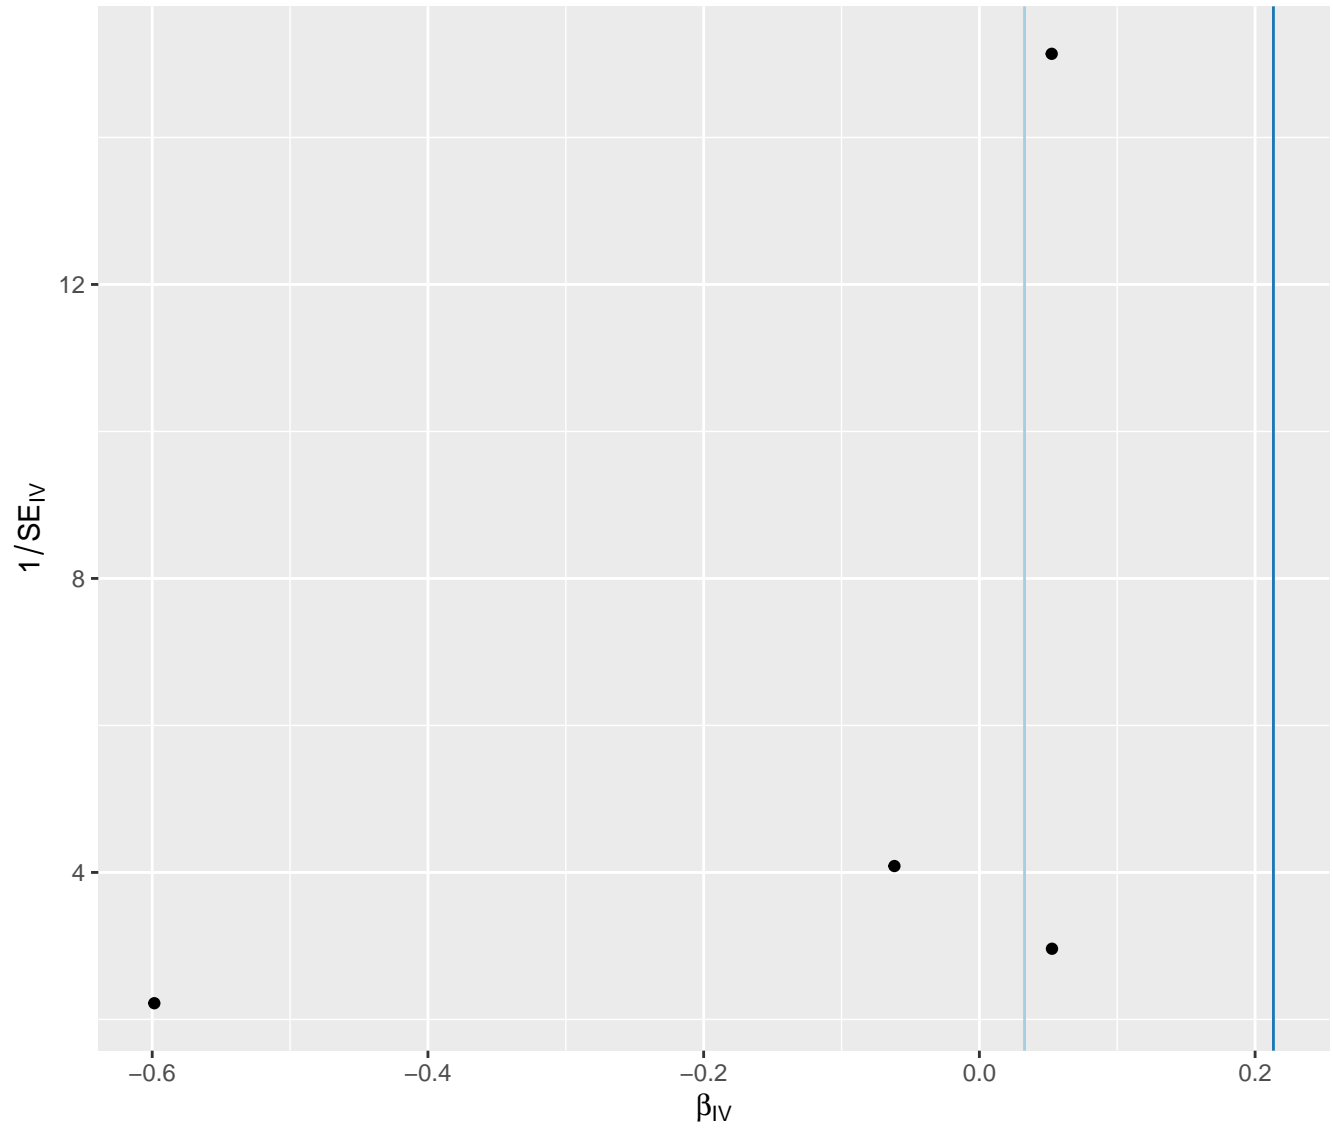

### MR Method

- Inverse variance weighted
- MR Egger

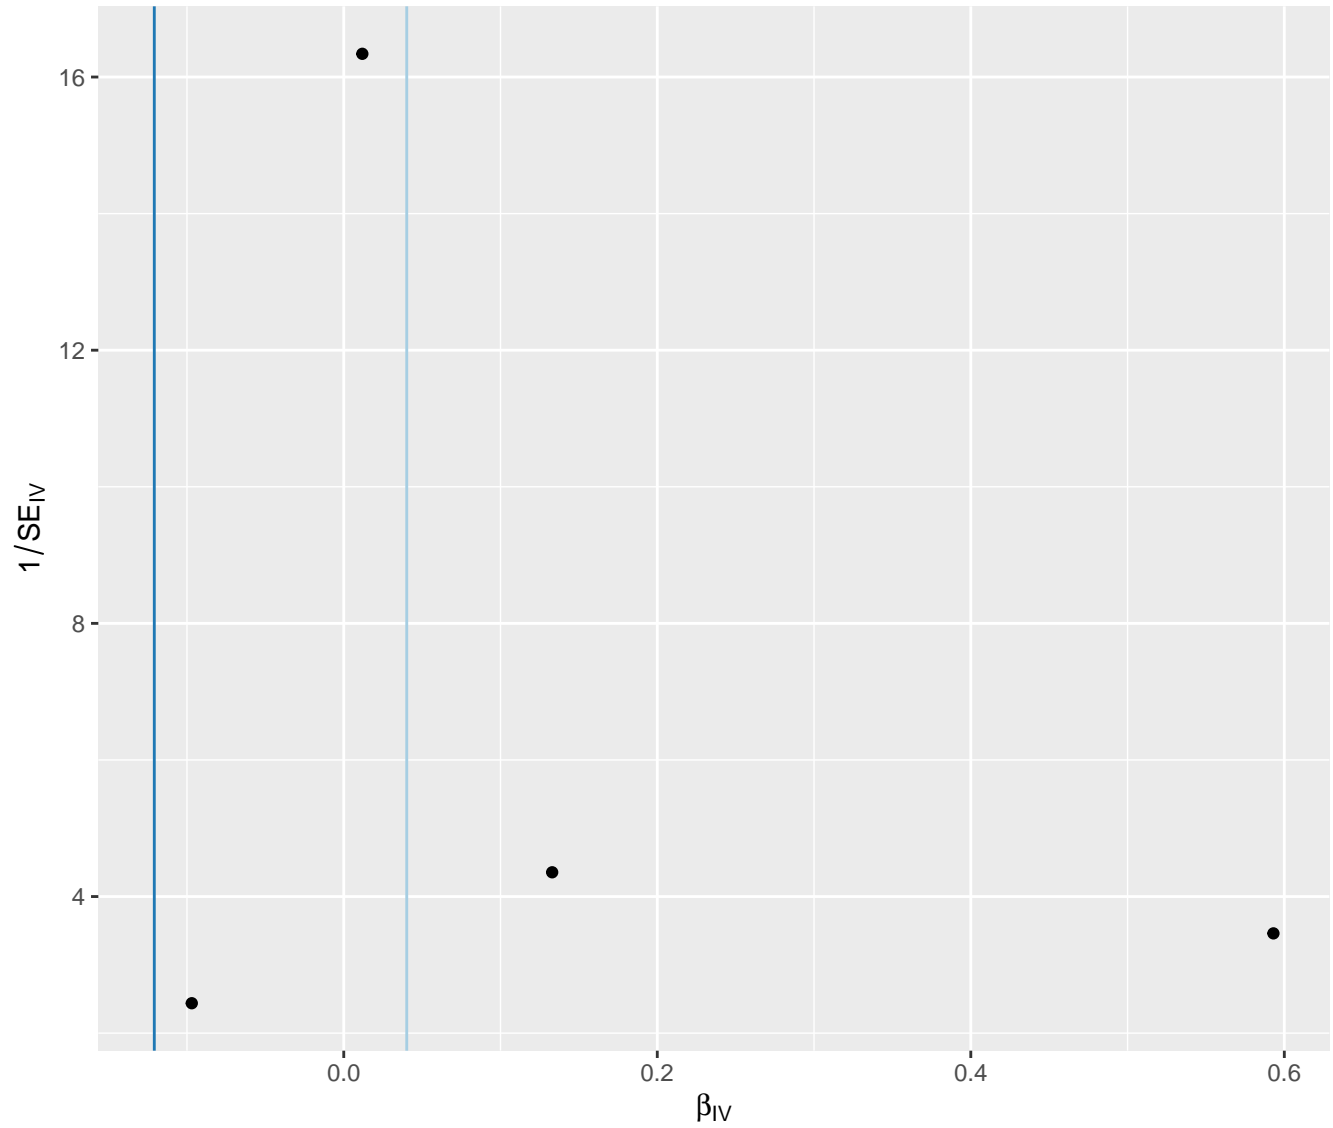



### MR Method

- Inverse variance weighted
- MR Egger

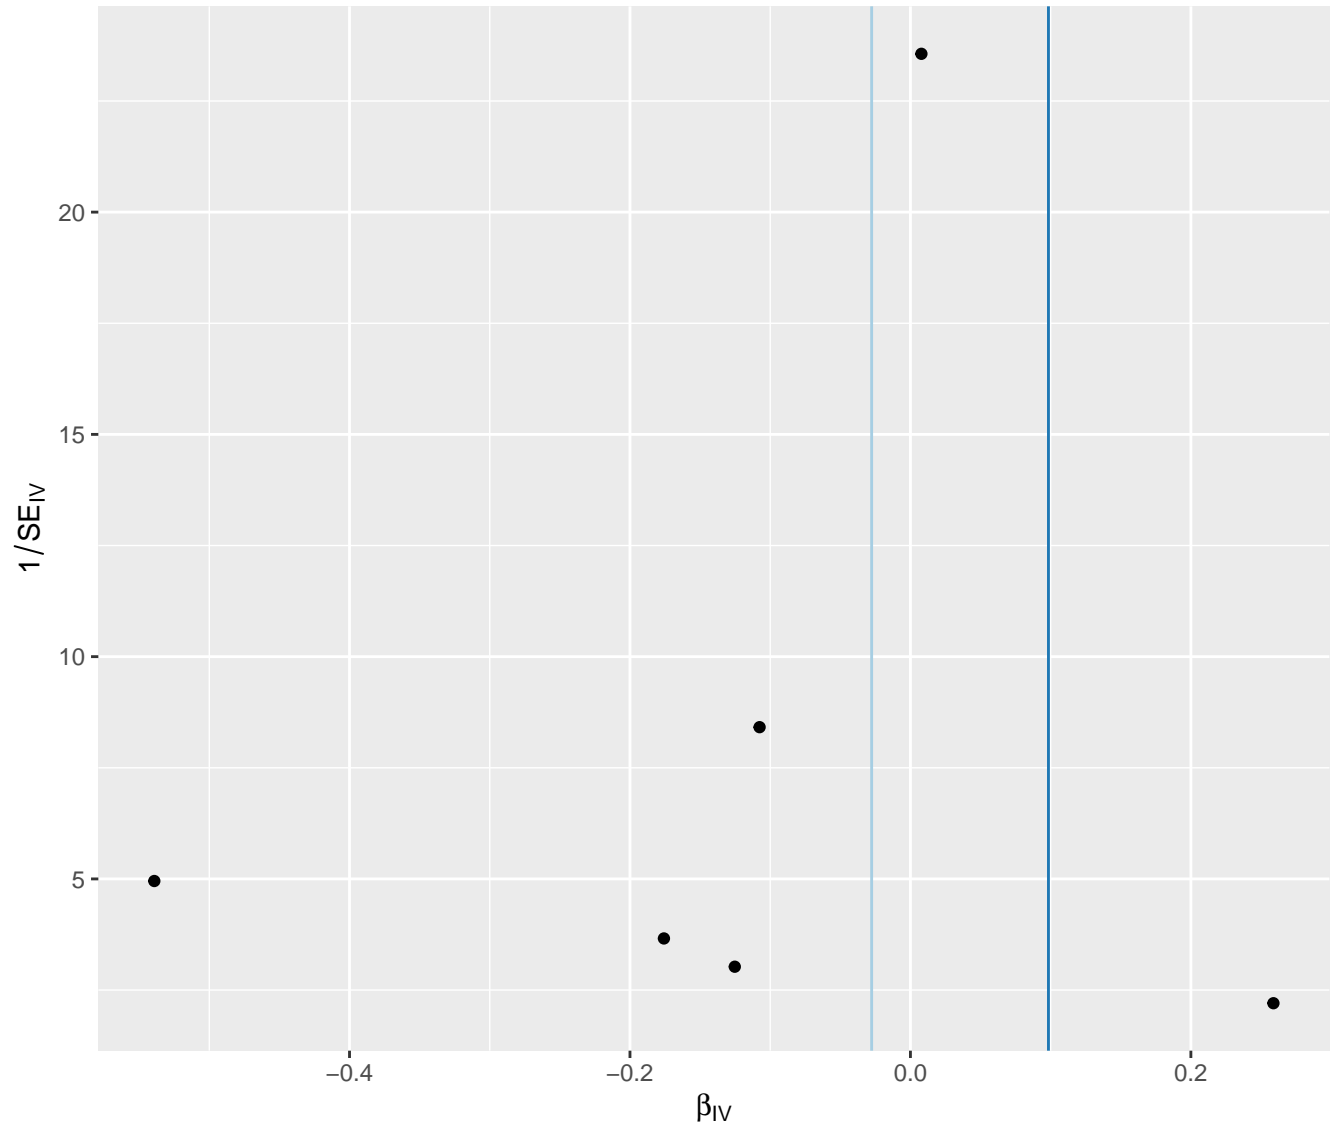

### MR Method

- Inverse variance weighted
- MR Egger

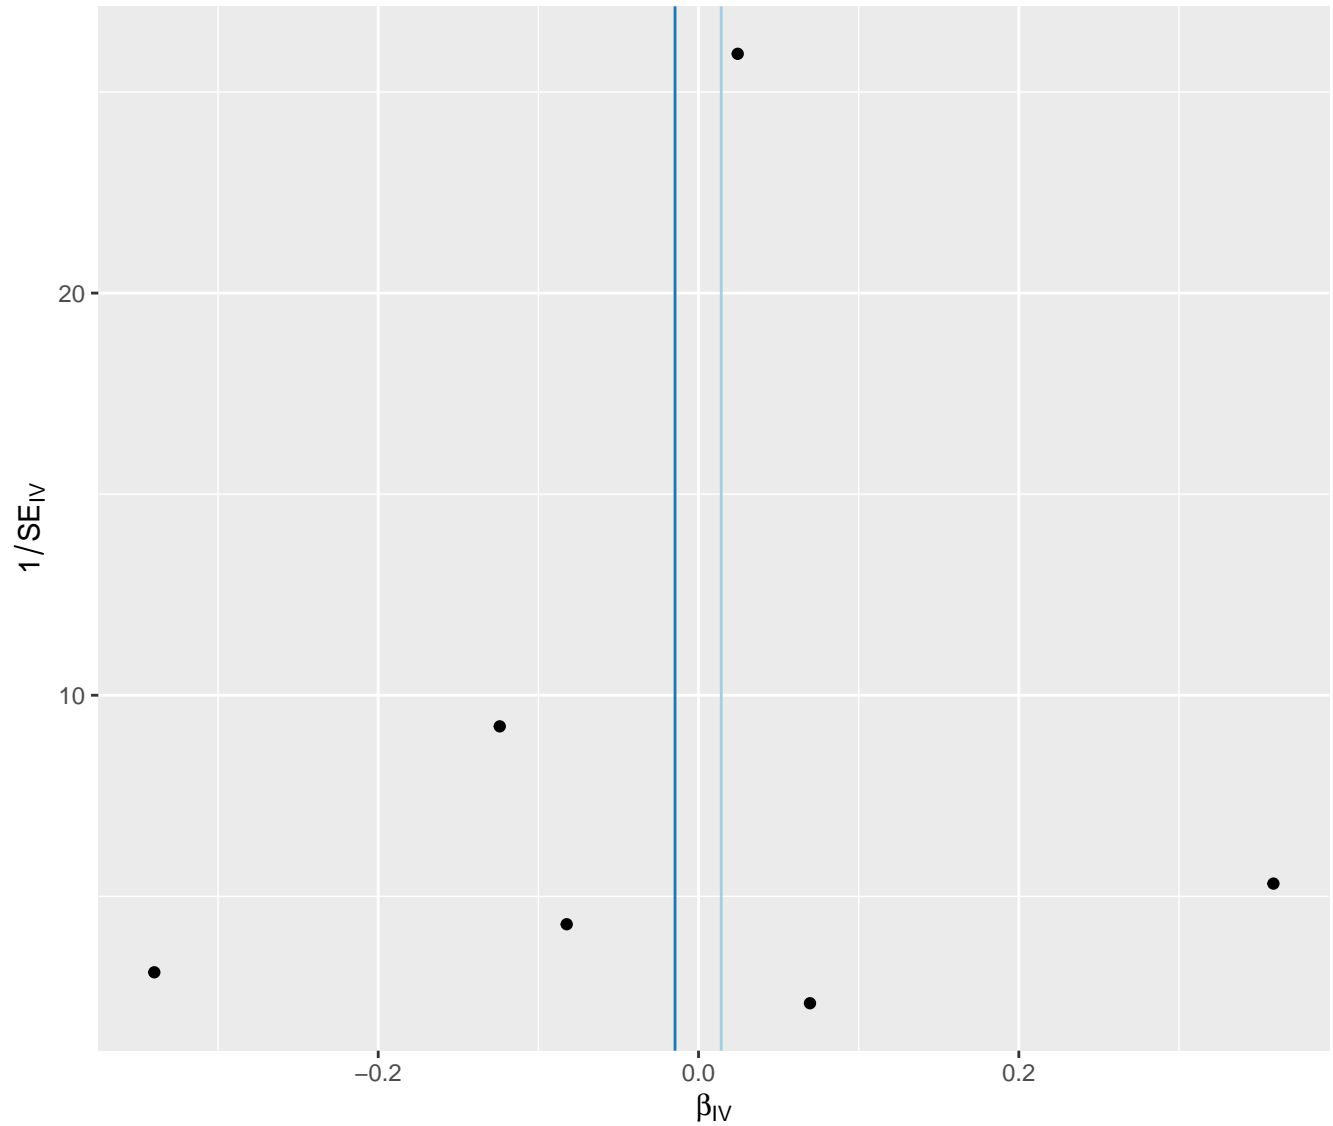

### MR Method

- Inverse variance weighted
- MR Egger

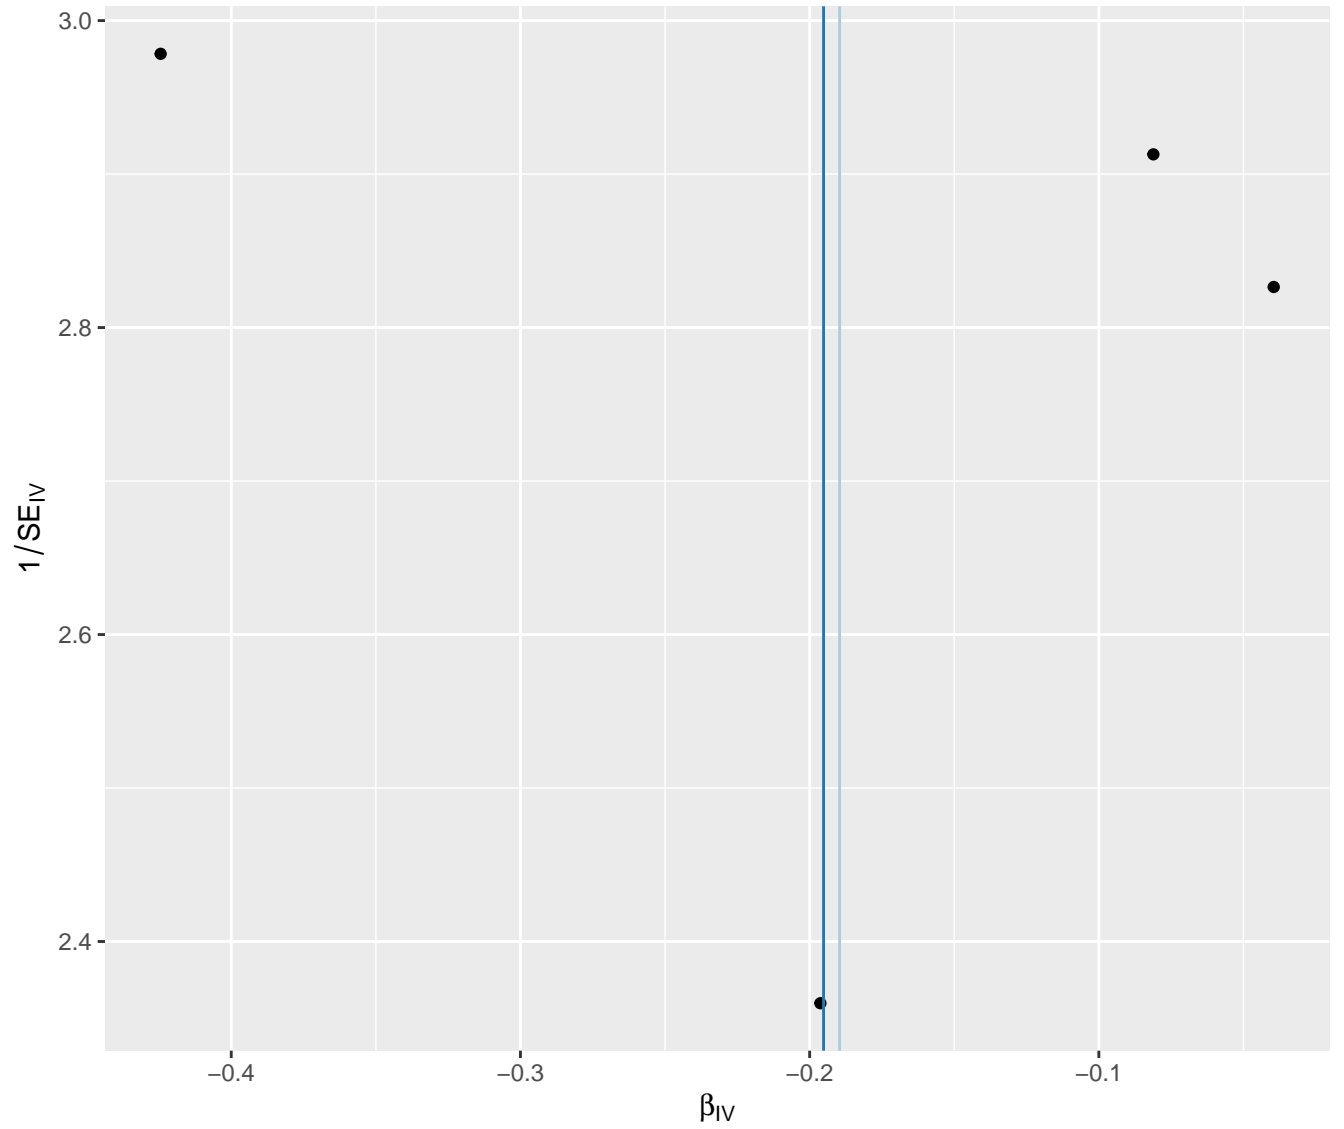

### MR Method

- Inverse variance weighted
- MR Egger

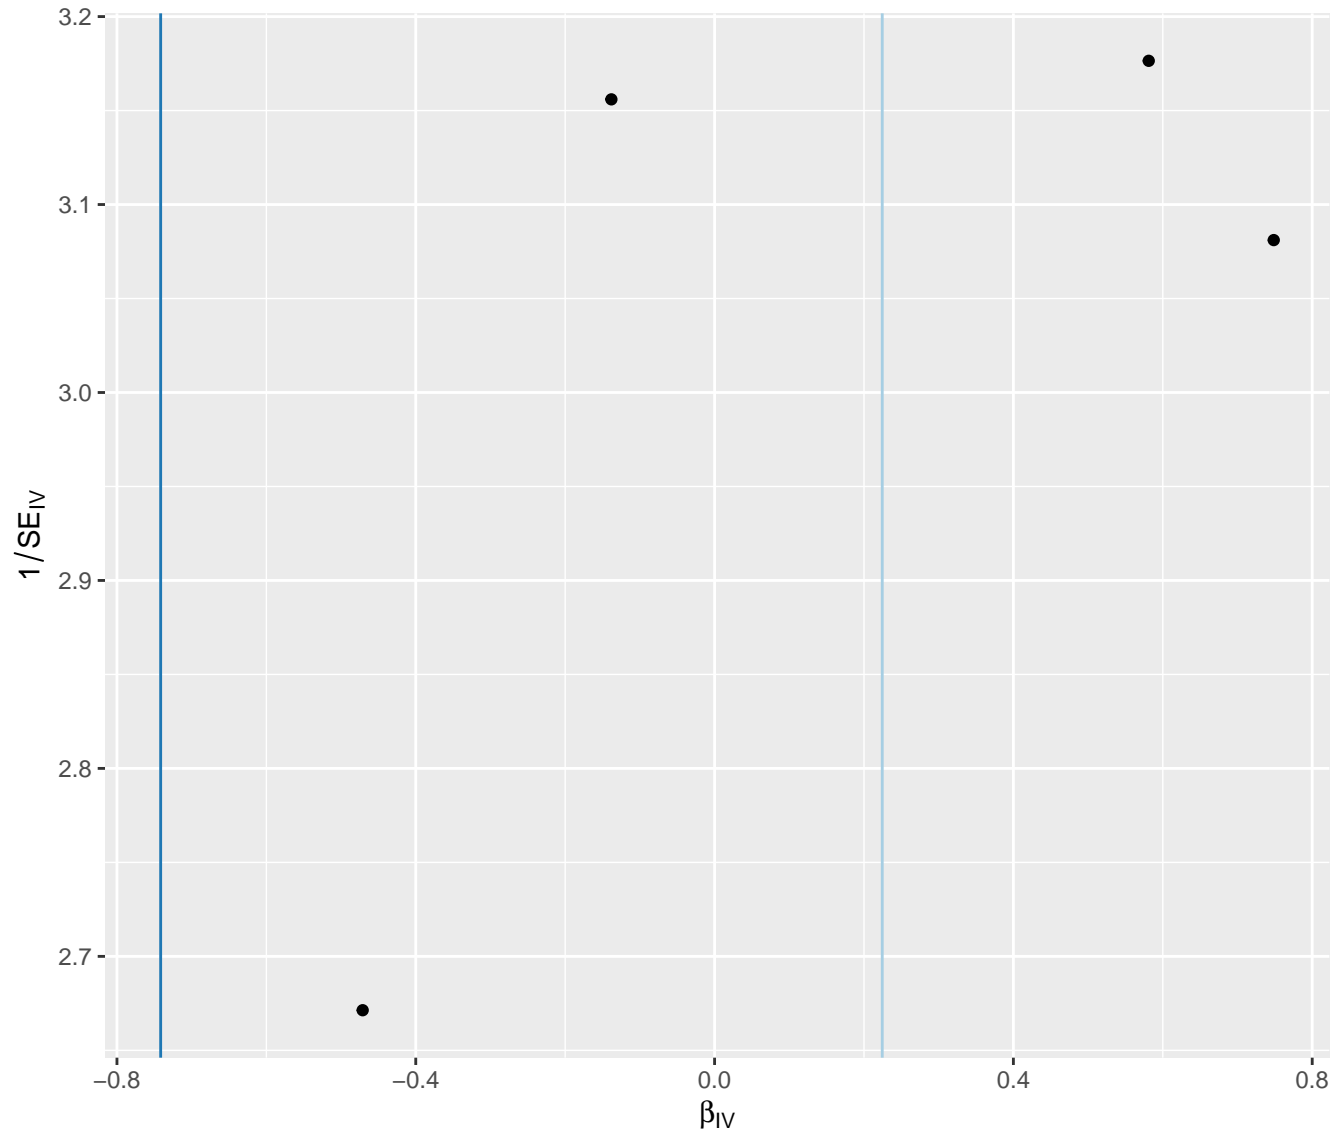

### MR Method

- Inverse variance weighted
- MR Egger

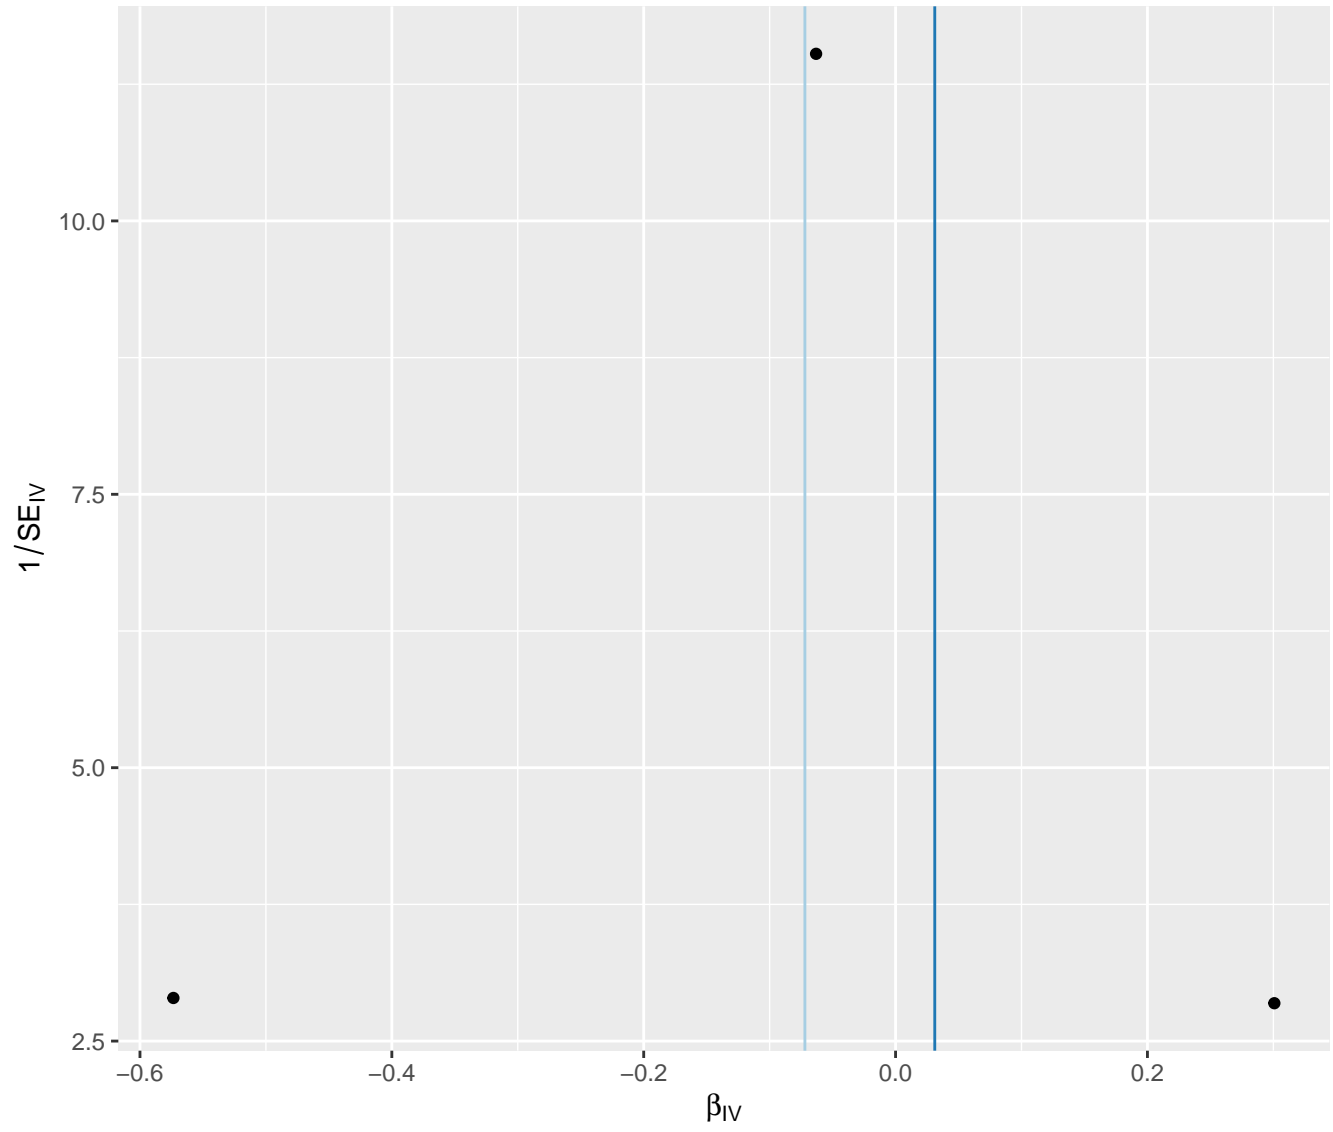

### MR Method

- Inverse variance weighted
- MR Egger

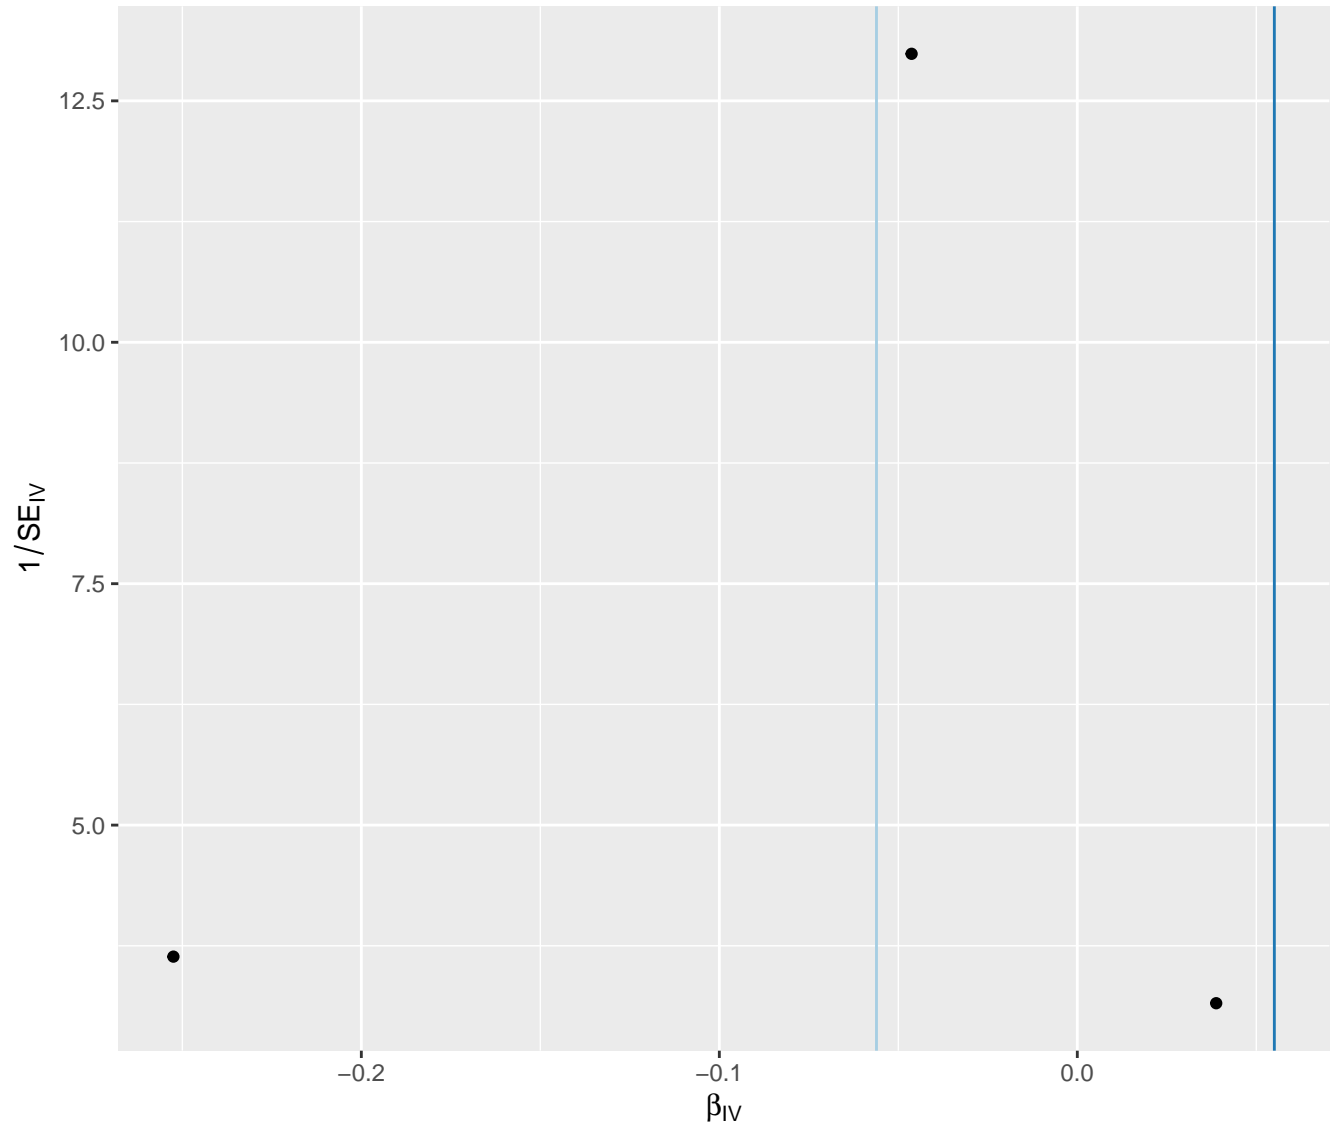

### MR Method

- Inverse variance weighted
- MR Egger

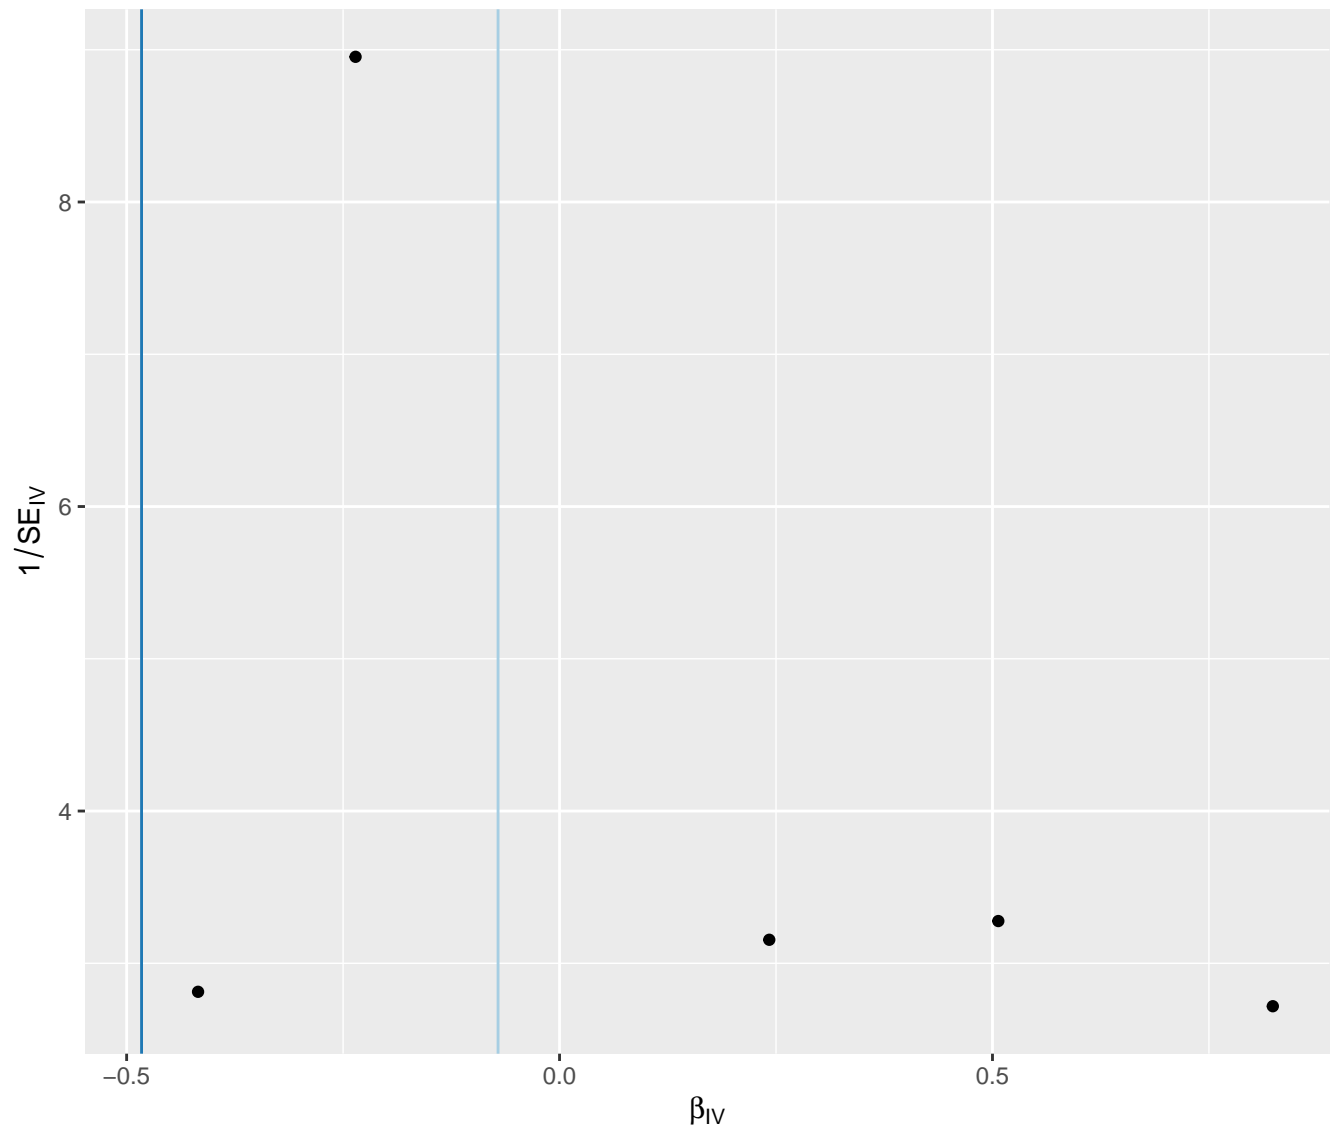

### MR Method

- Inverse variance weighted
- MR Egger

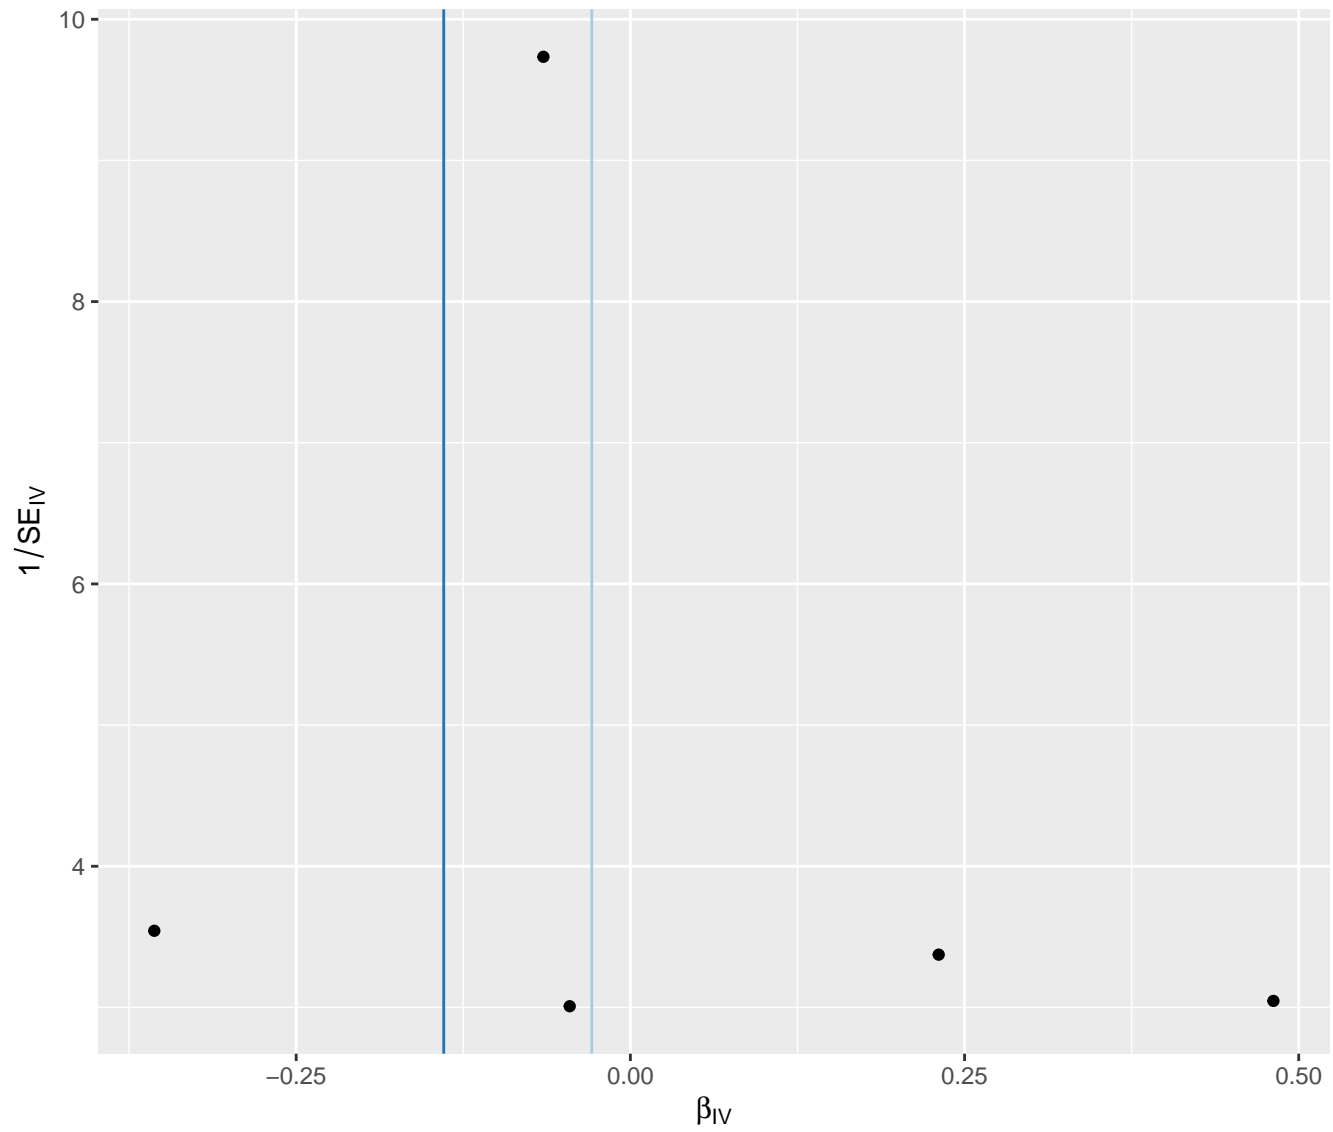



### MR Method

- Inverse variance weighted
- MR Egger

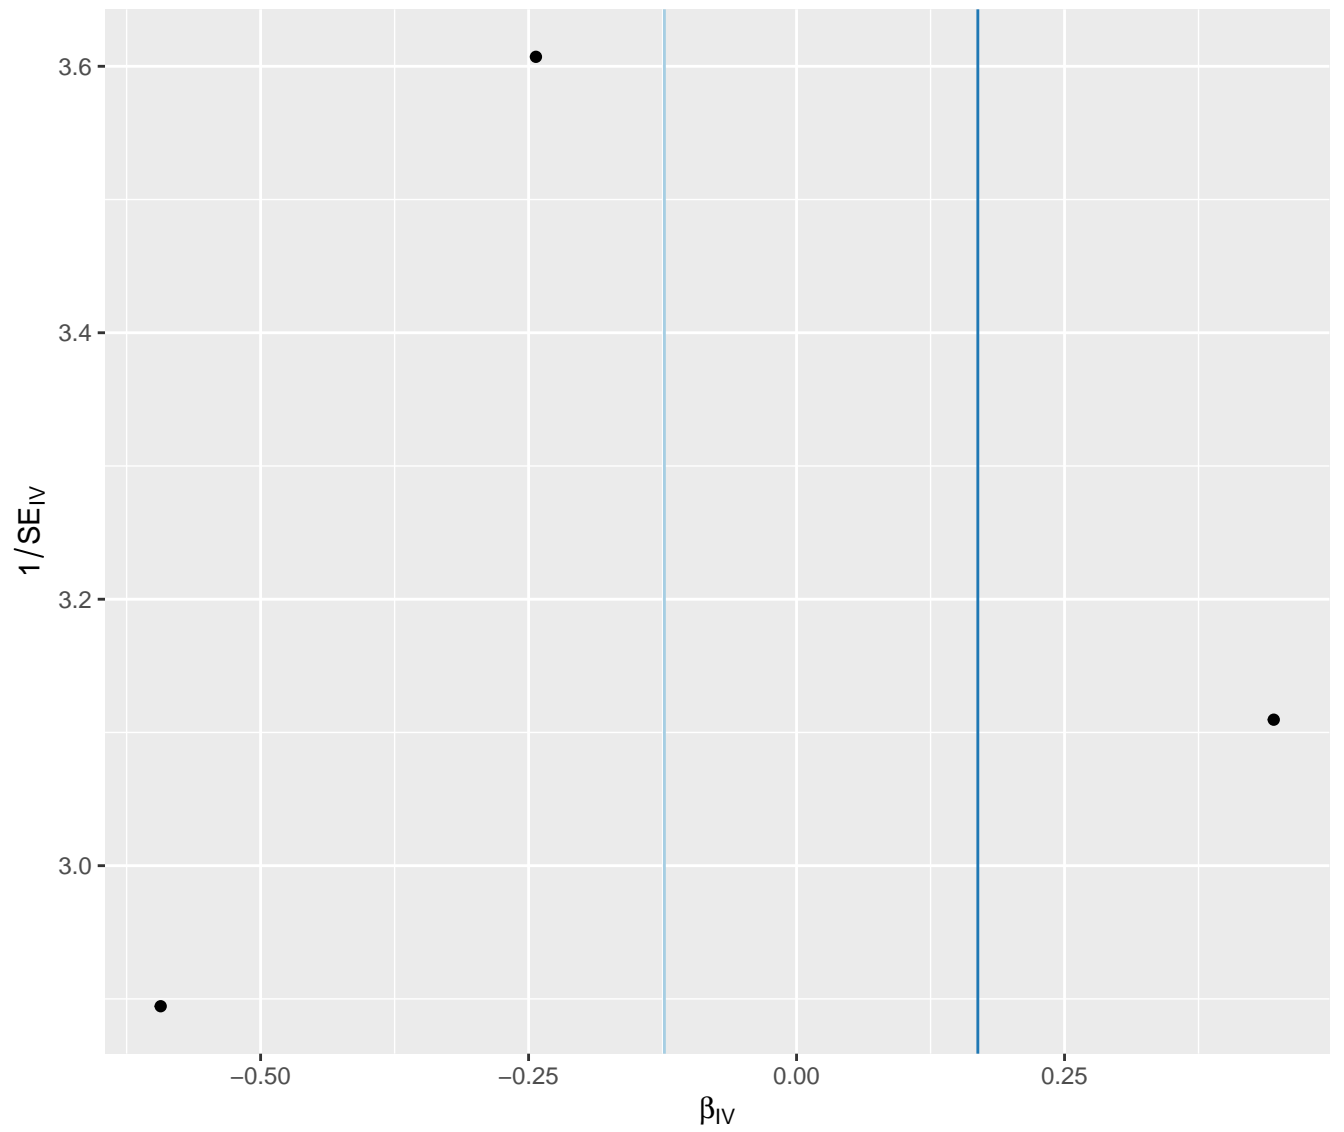

### MR Method

- Inverse variance weighted
- MR Egger

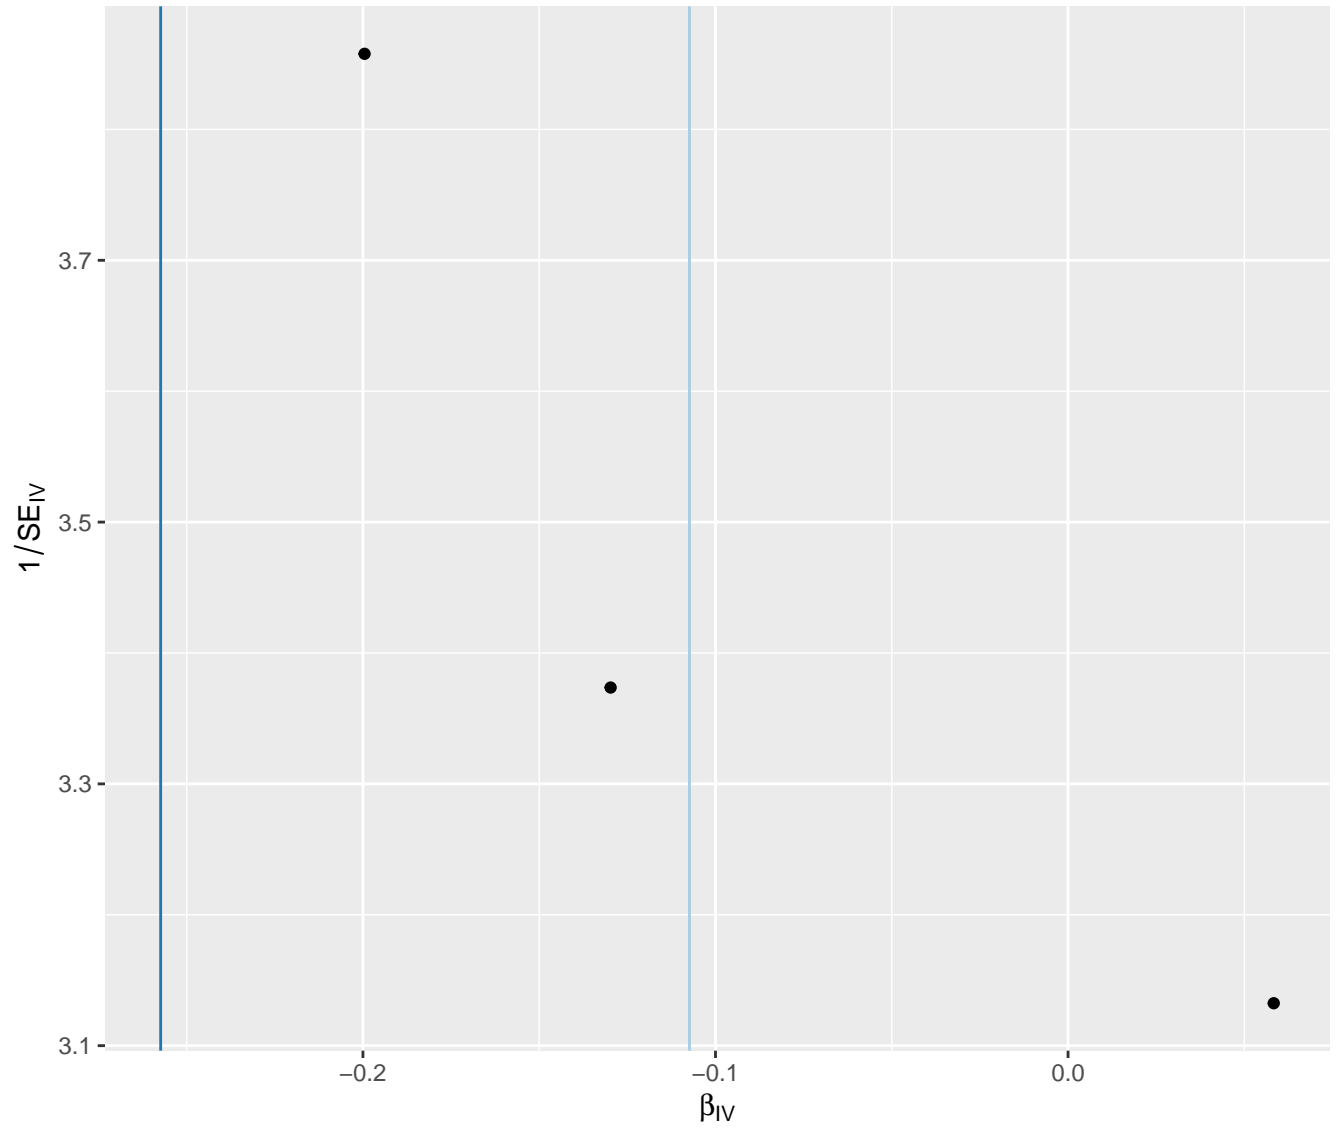

MR Method

- Inverse variance weighted
- MR Egger

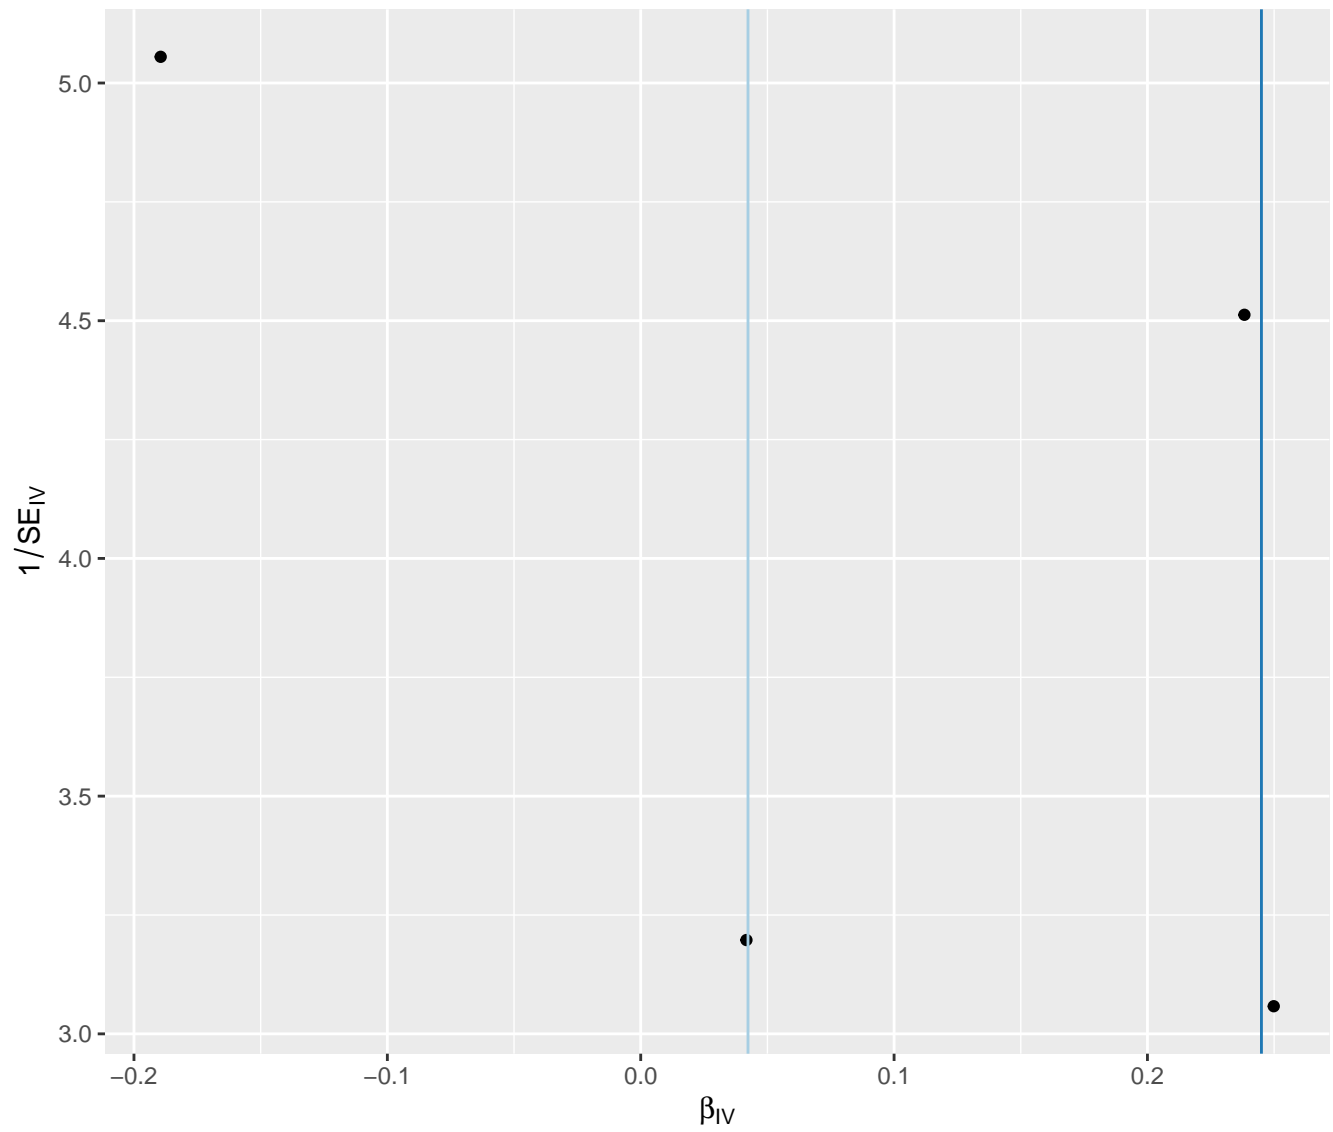

### MR Method

- Inverse variance weighted
- MR Egger

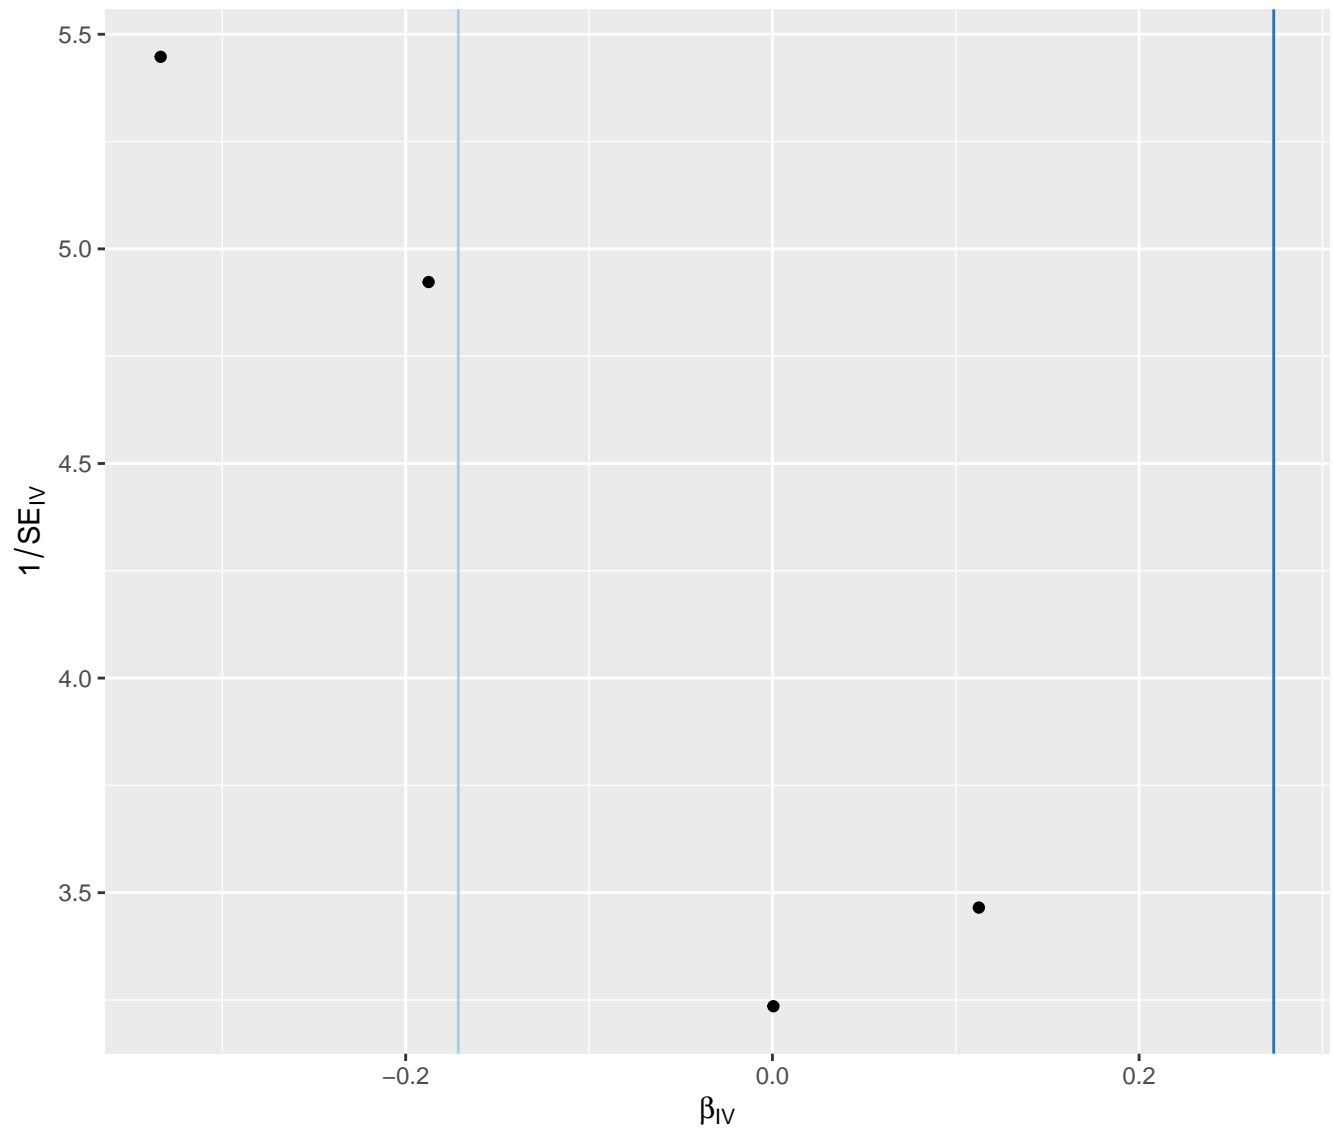

### MR Method

- Inverse variance weighted
- MR Egger

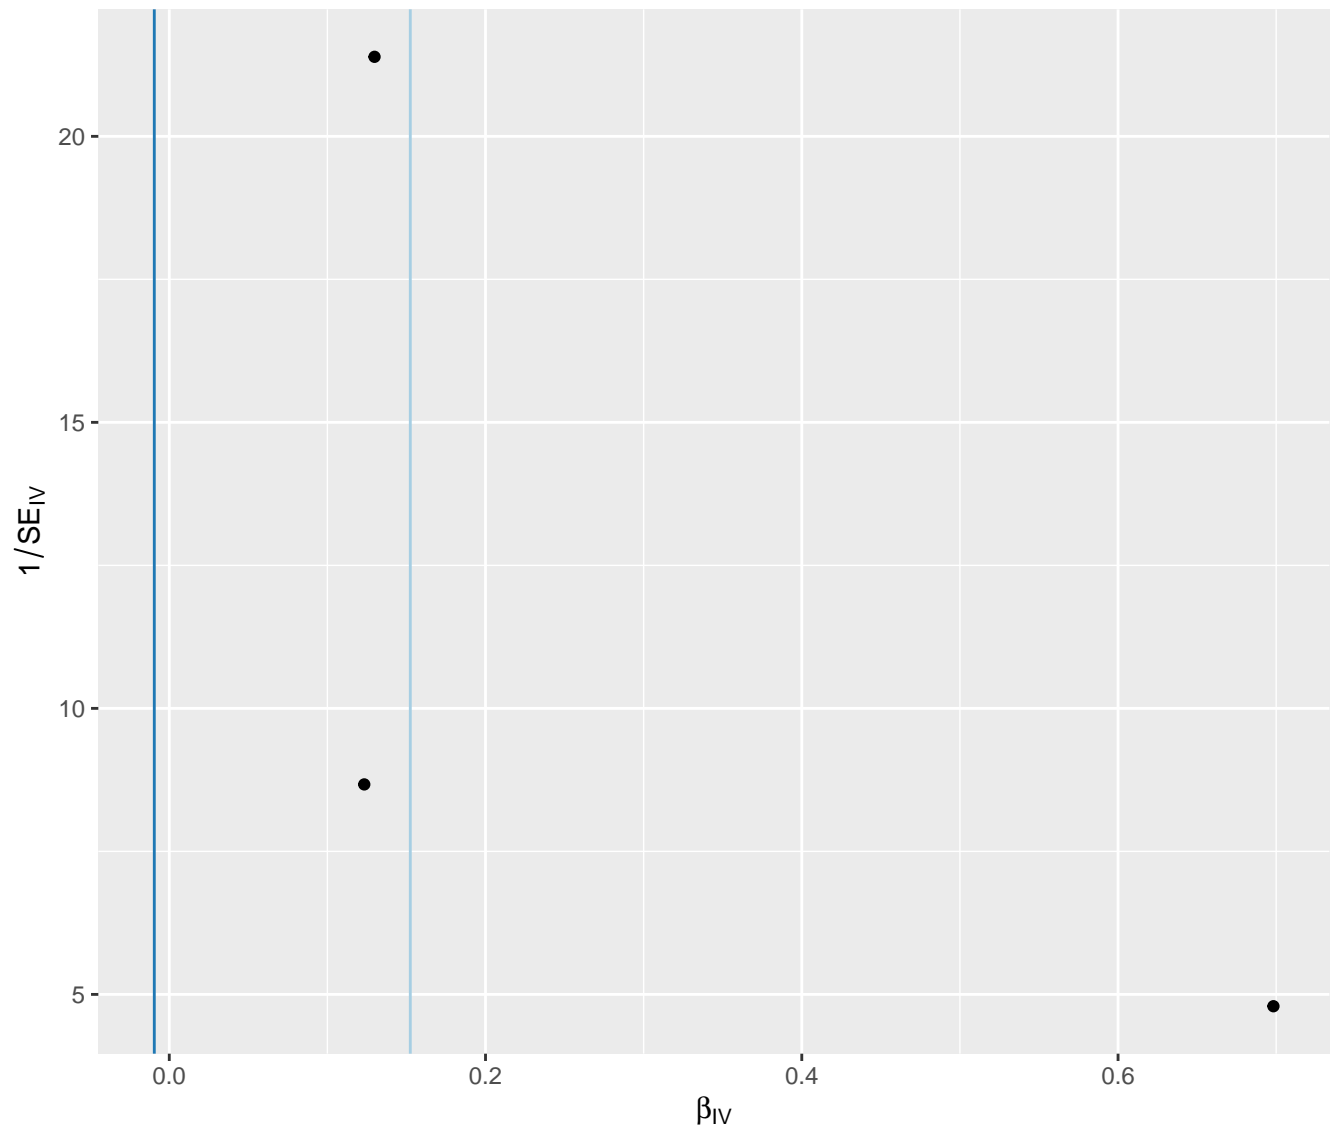

### MR Method

- Inverse variance weighted
- MR Egger

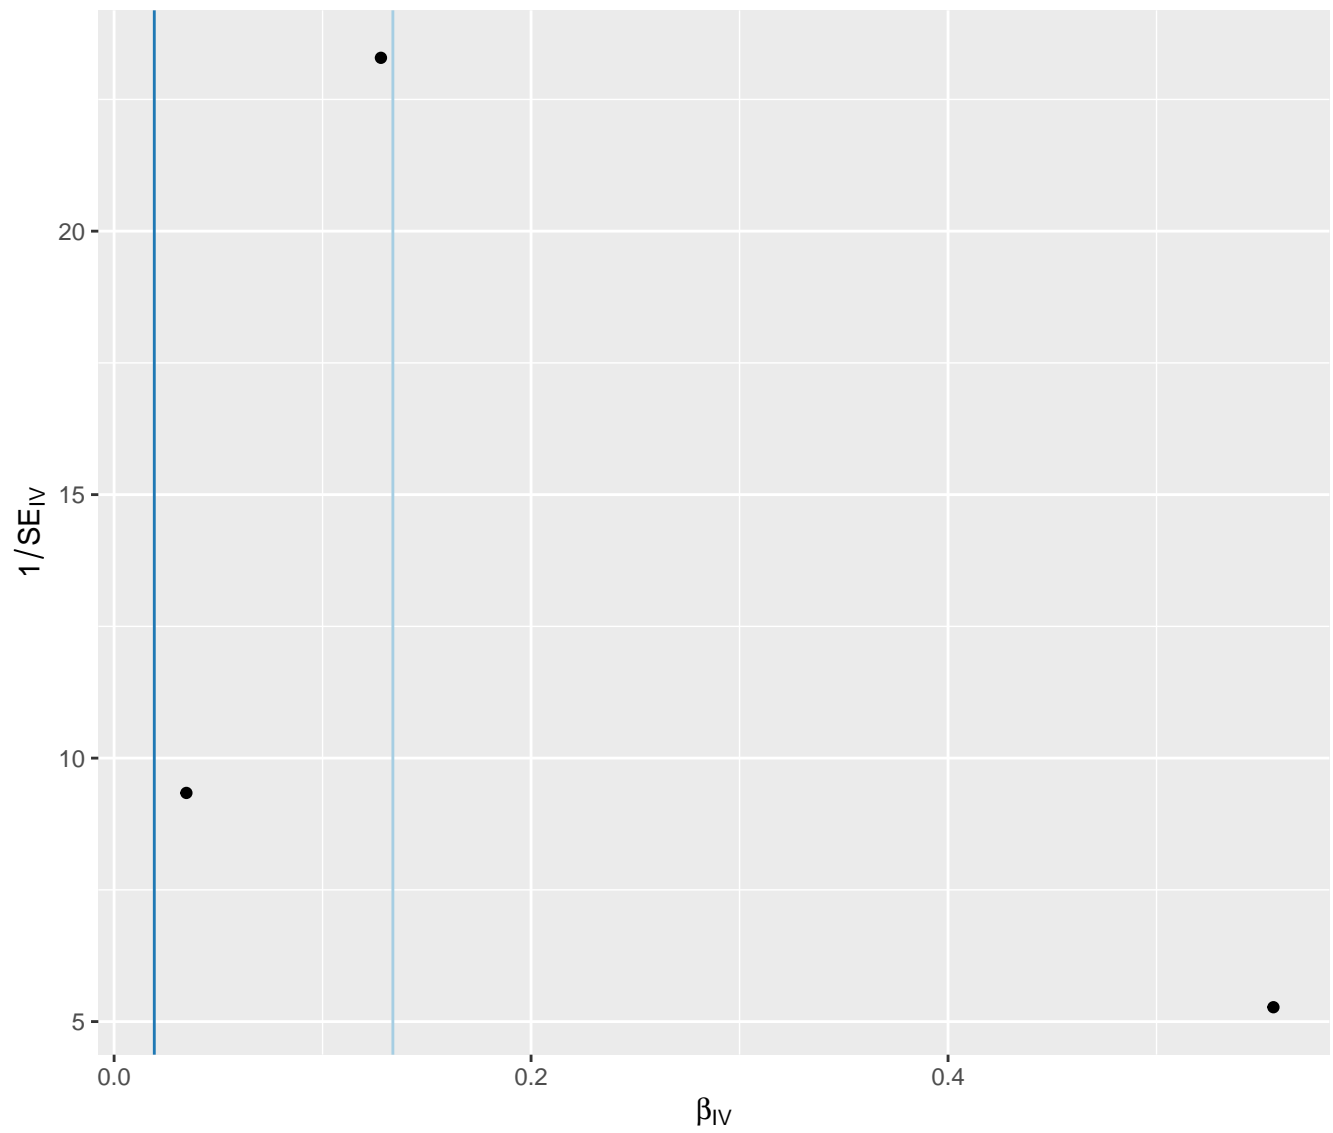

### MR Method

- Inverse variance weighted
- MR Egger

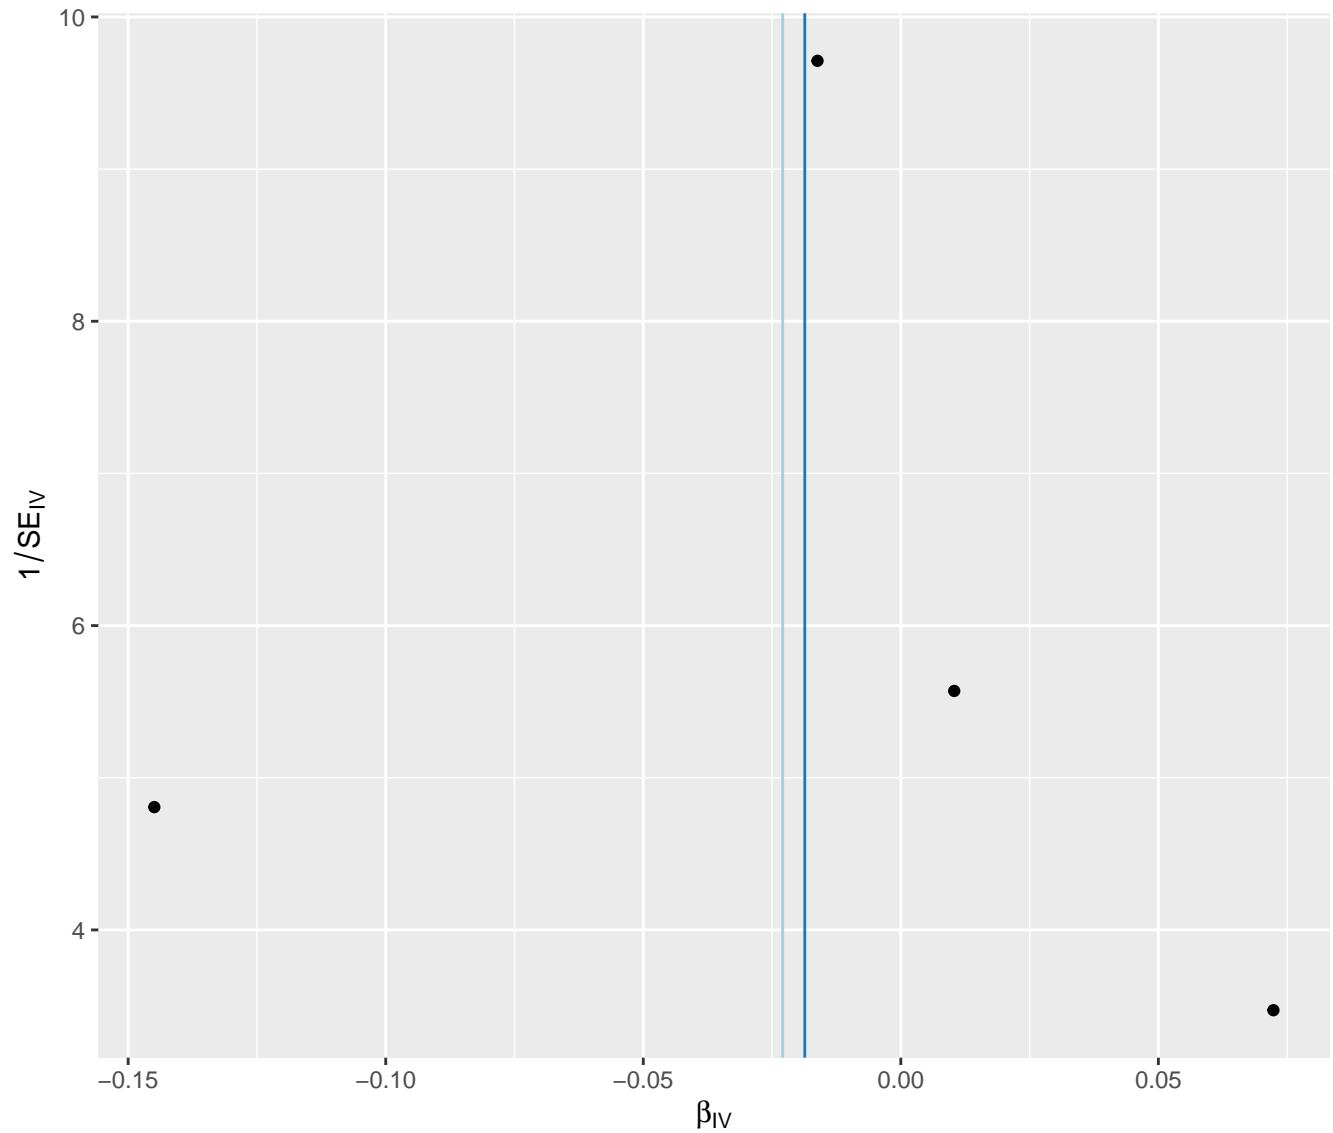

### MR Method

- Inverse variance weighted
- MR Egger

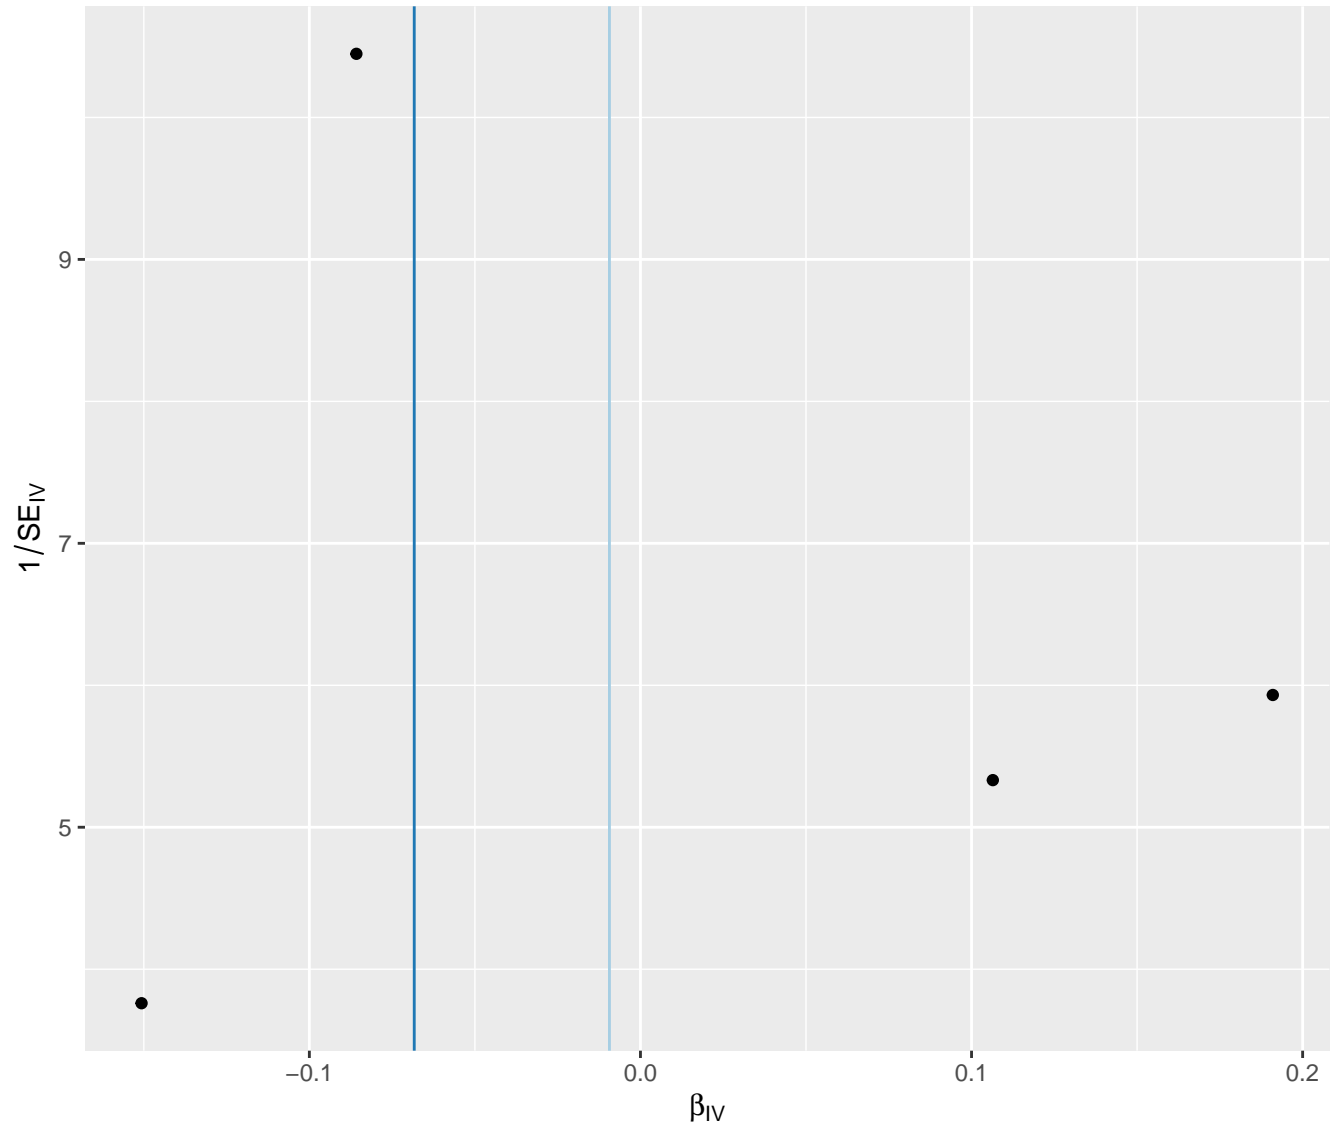



### MR Method

- Inverse variance weighted
- MR Egger

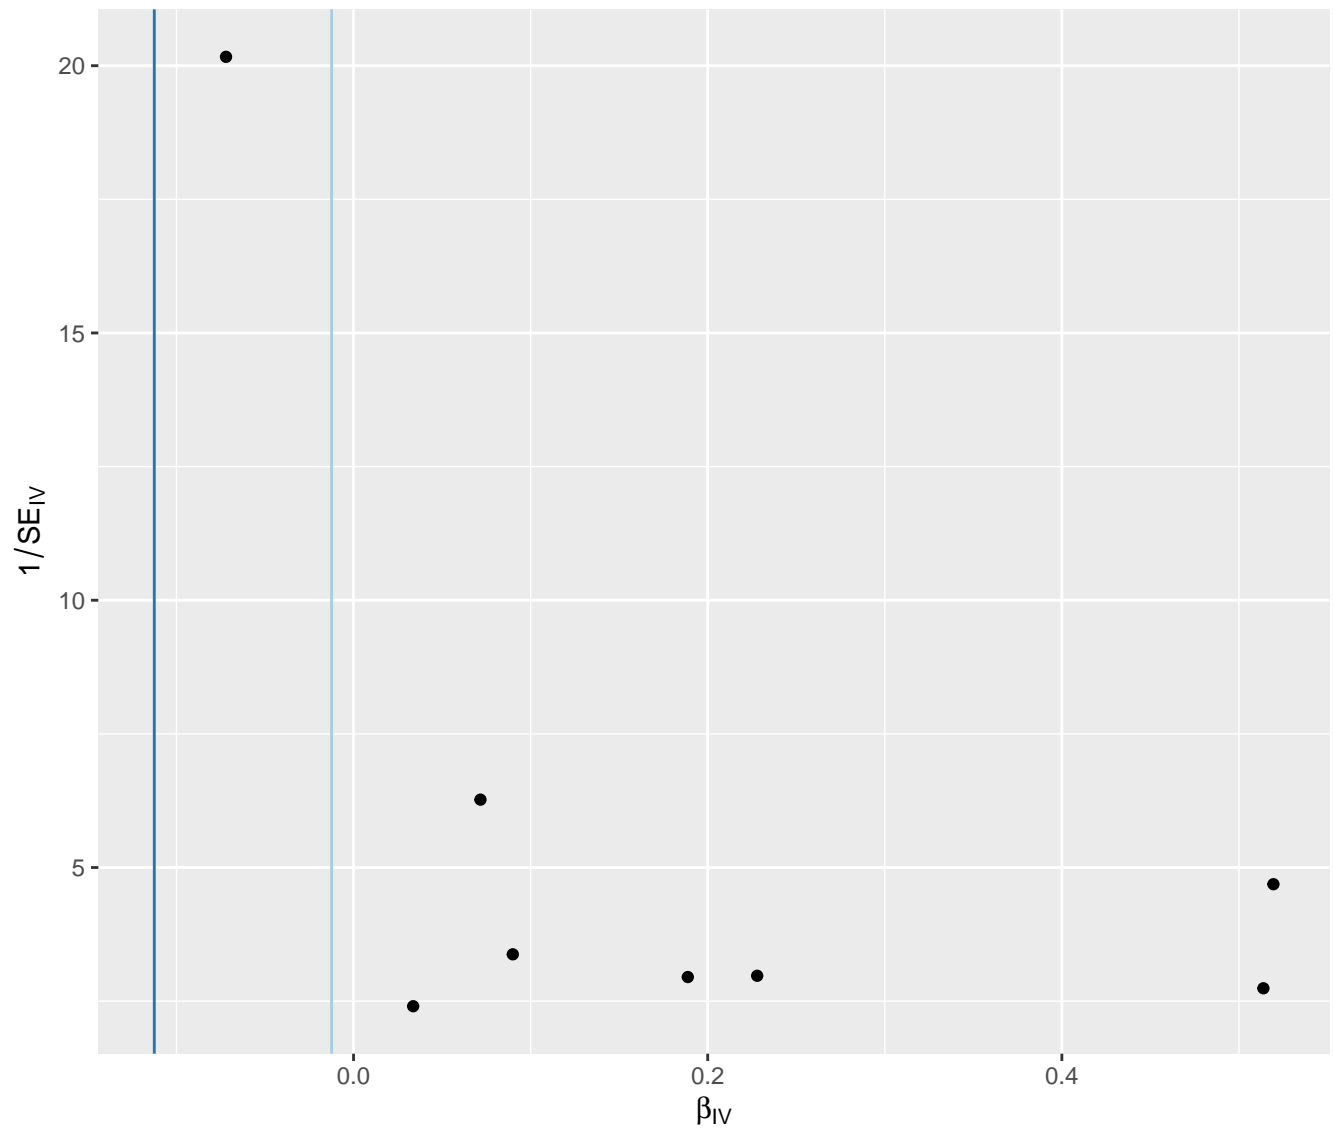

### MR Method

- Inverse variance weighted
- MR Egger

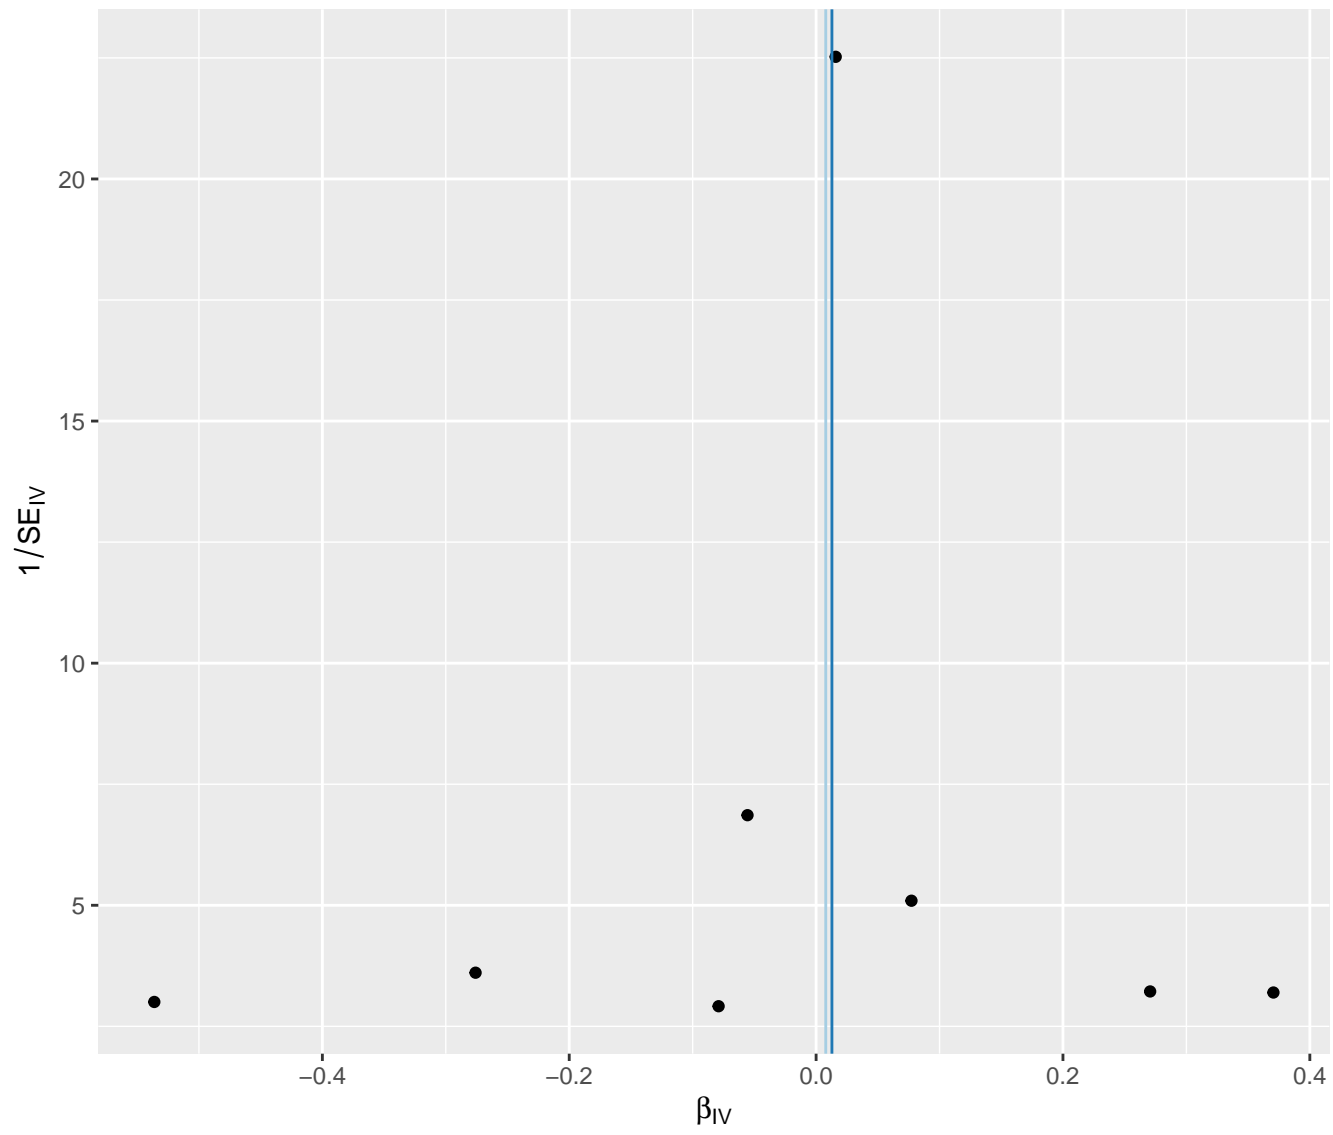

### MR Method

- Inverse variance weighted
- MR Egger

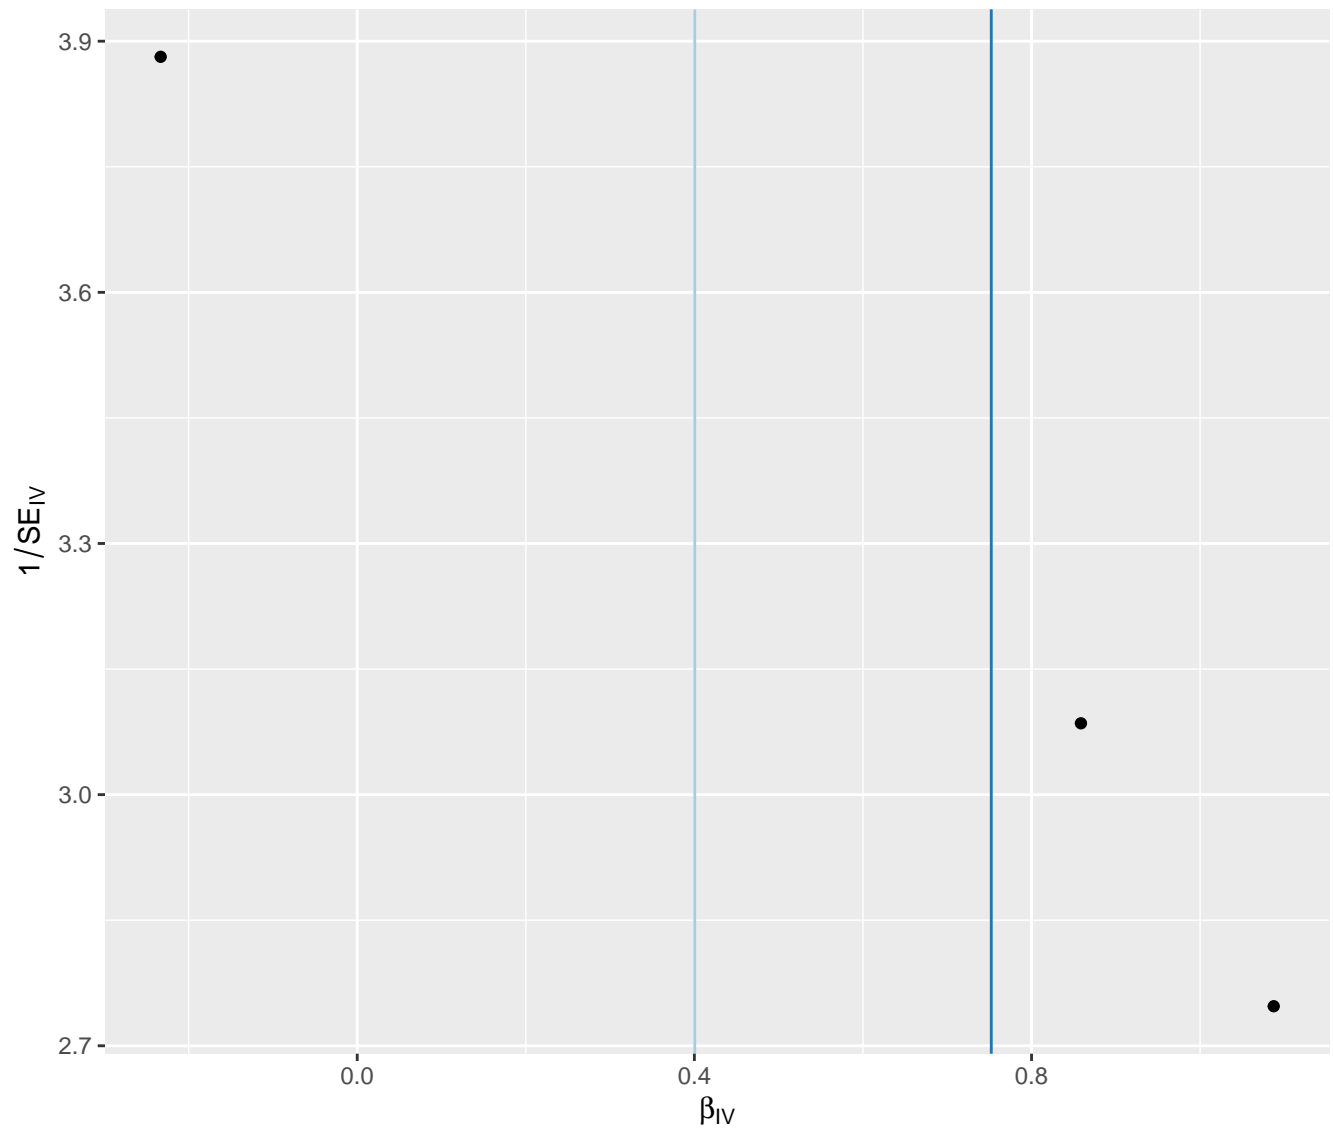

### MR Method

- Inverse variance weighted
- MR Egger

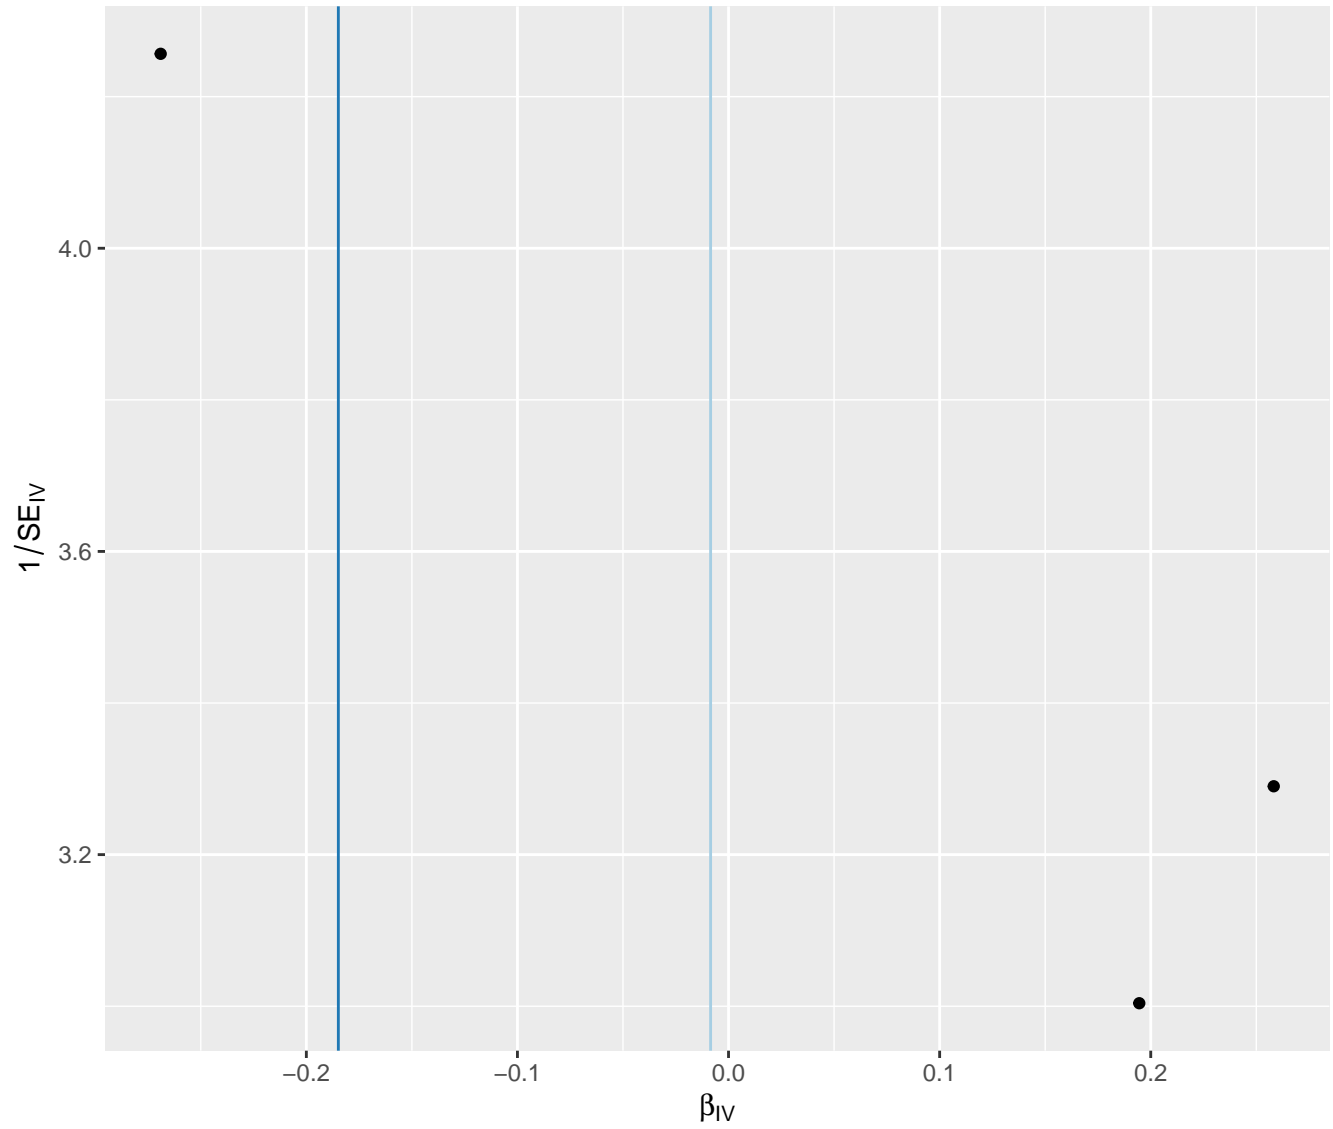

### MR Method

- Inverse variance weighted
- MR Egger

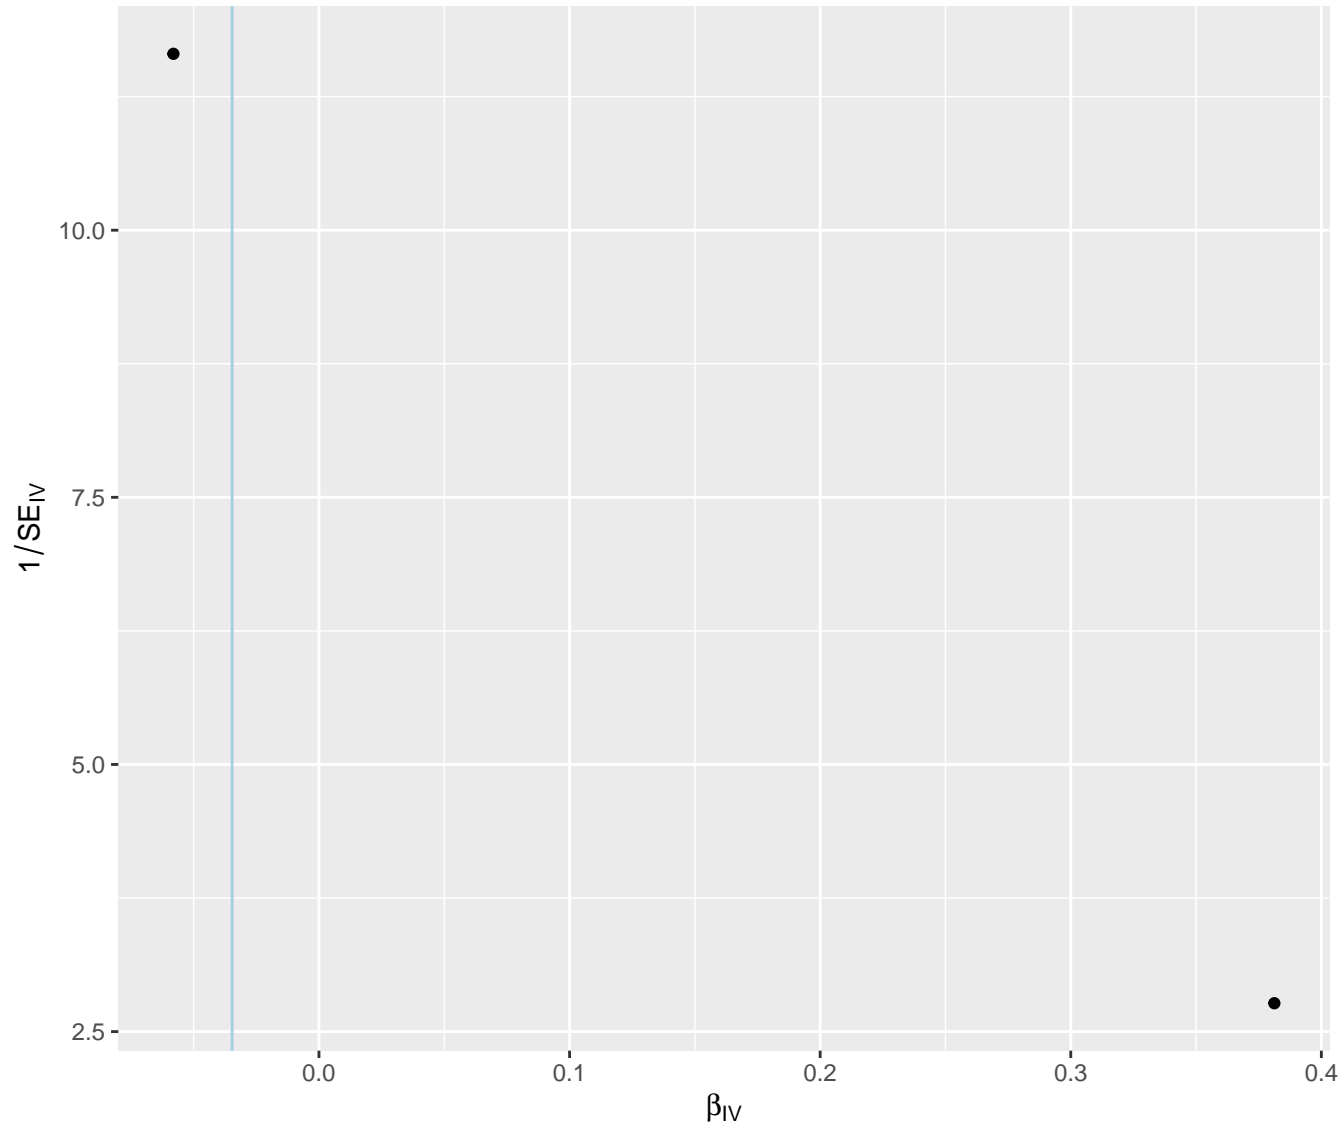

### MR Method

- Inverse variance weighted
- MR Egger

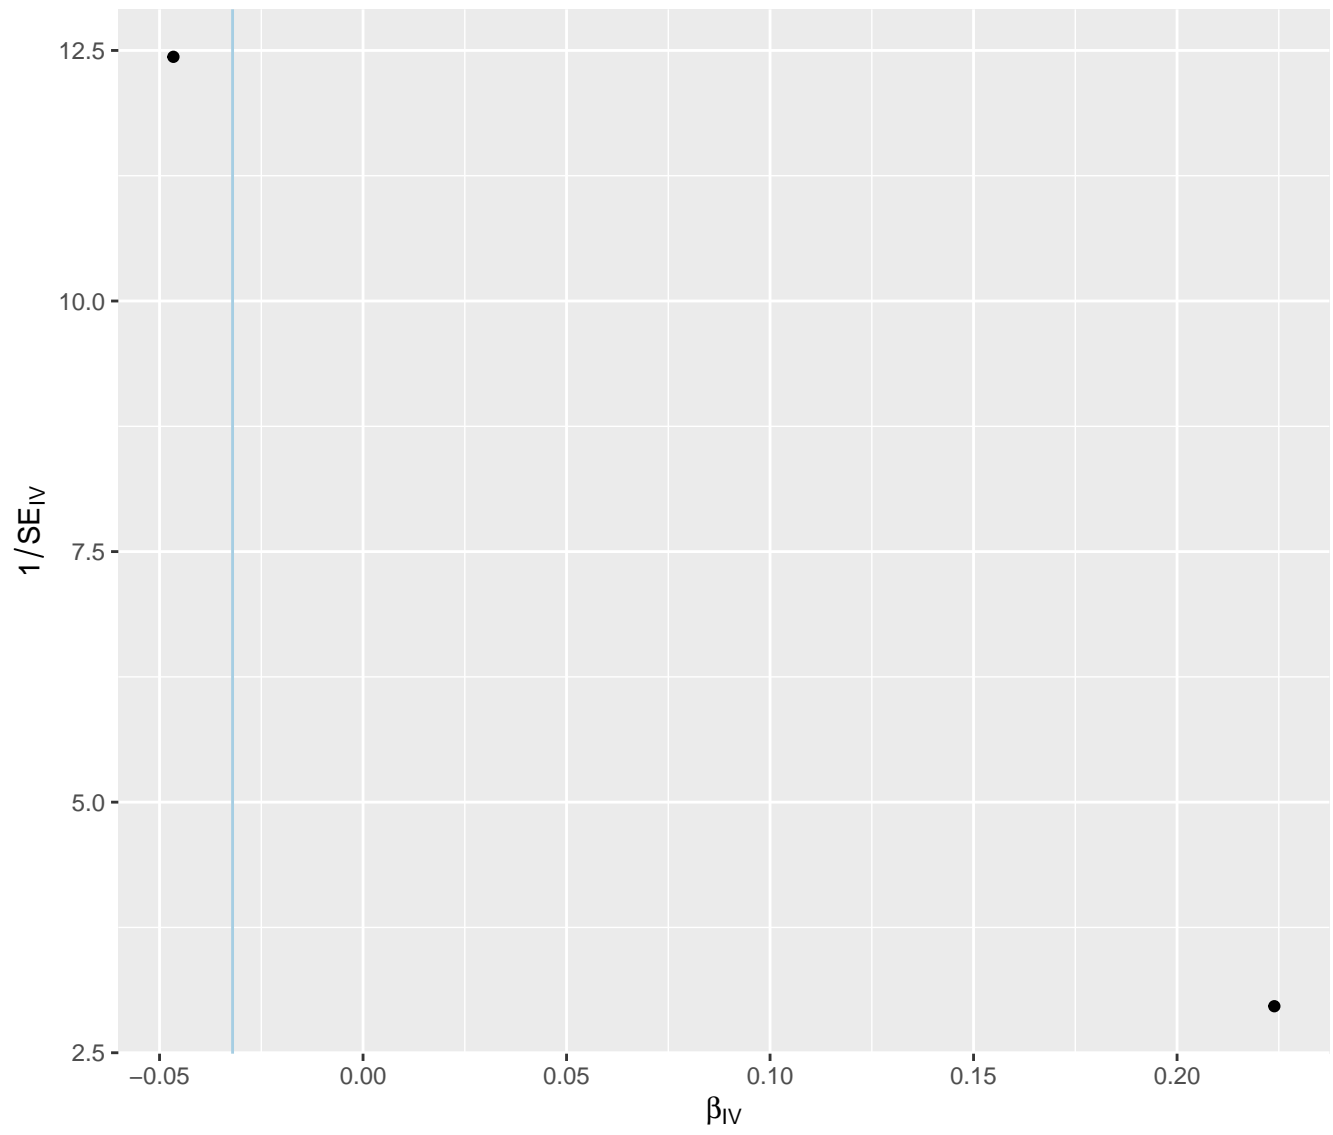

### MR Method

- Inverse variance weighted
- MR Egger

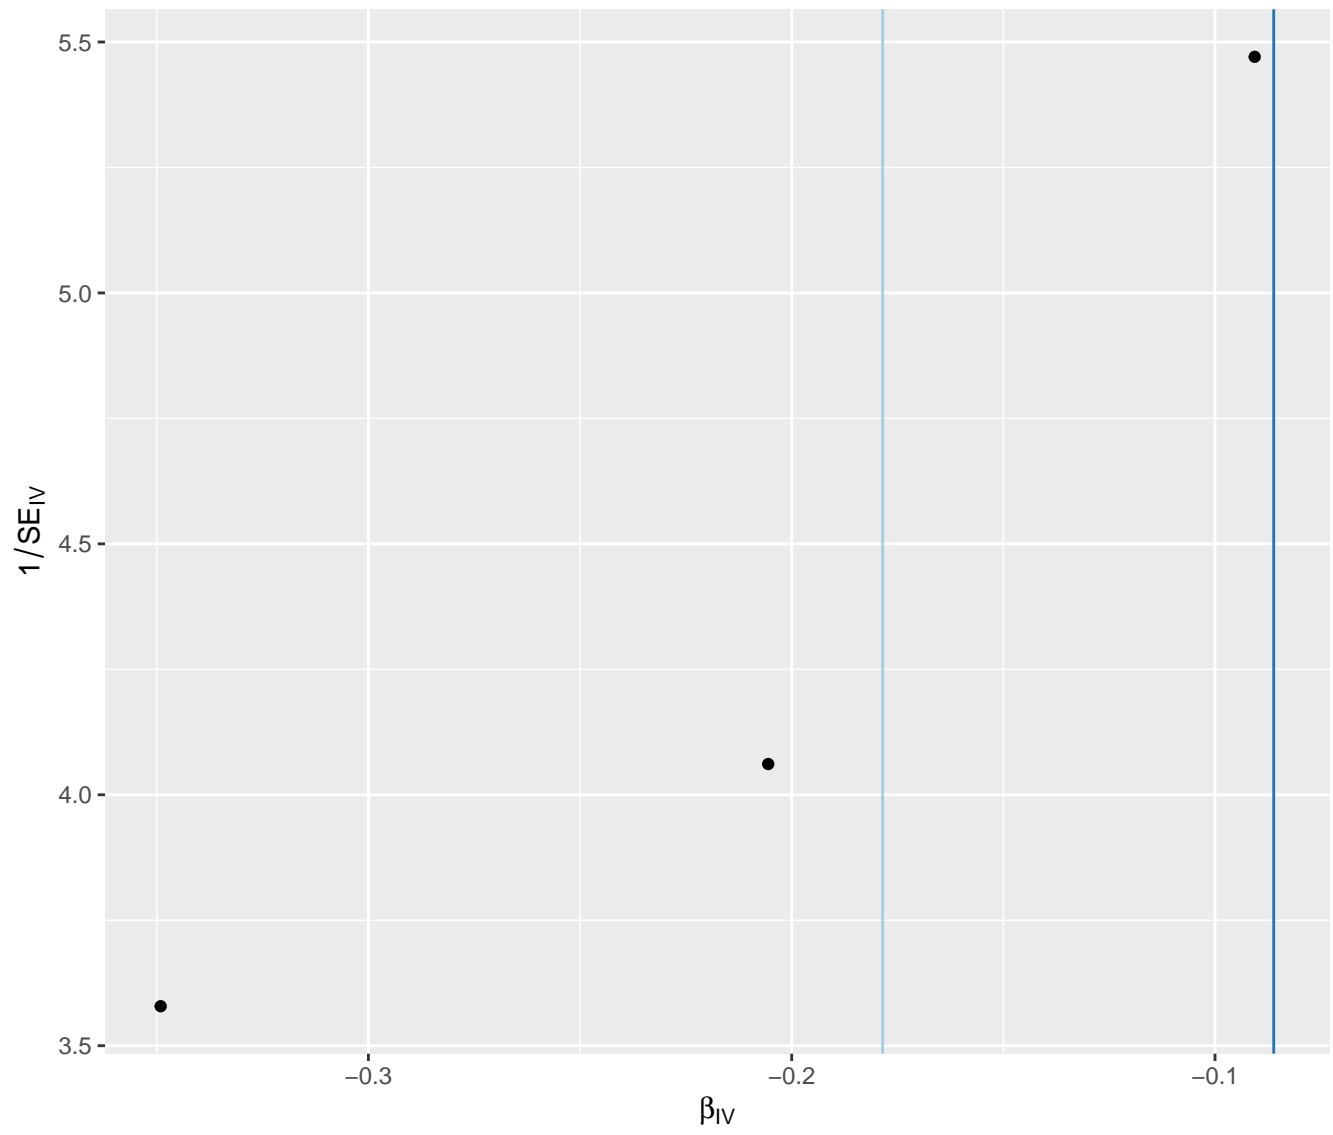

### MR Method

- Inverse variance weighted
- MR Egger

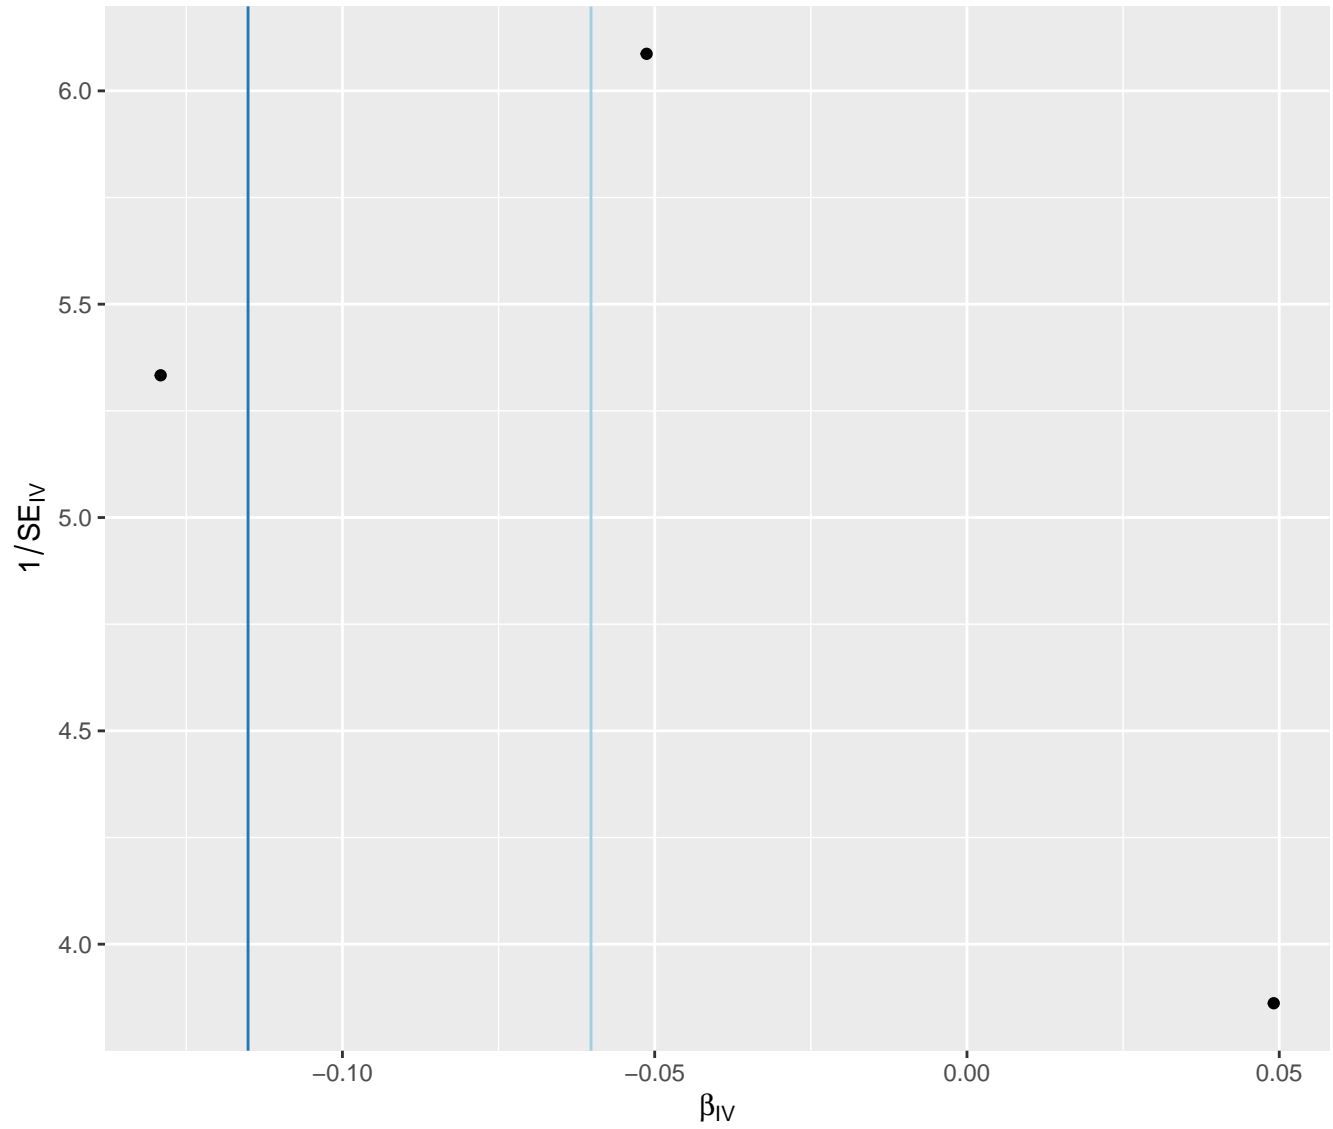



### MR Method

- Inverse variance weighted
- MR Egger

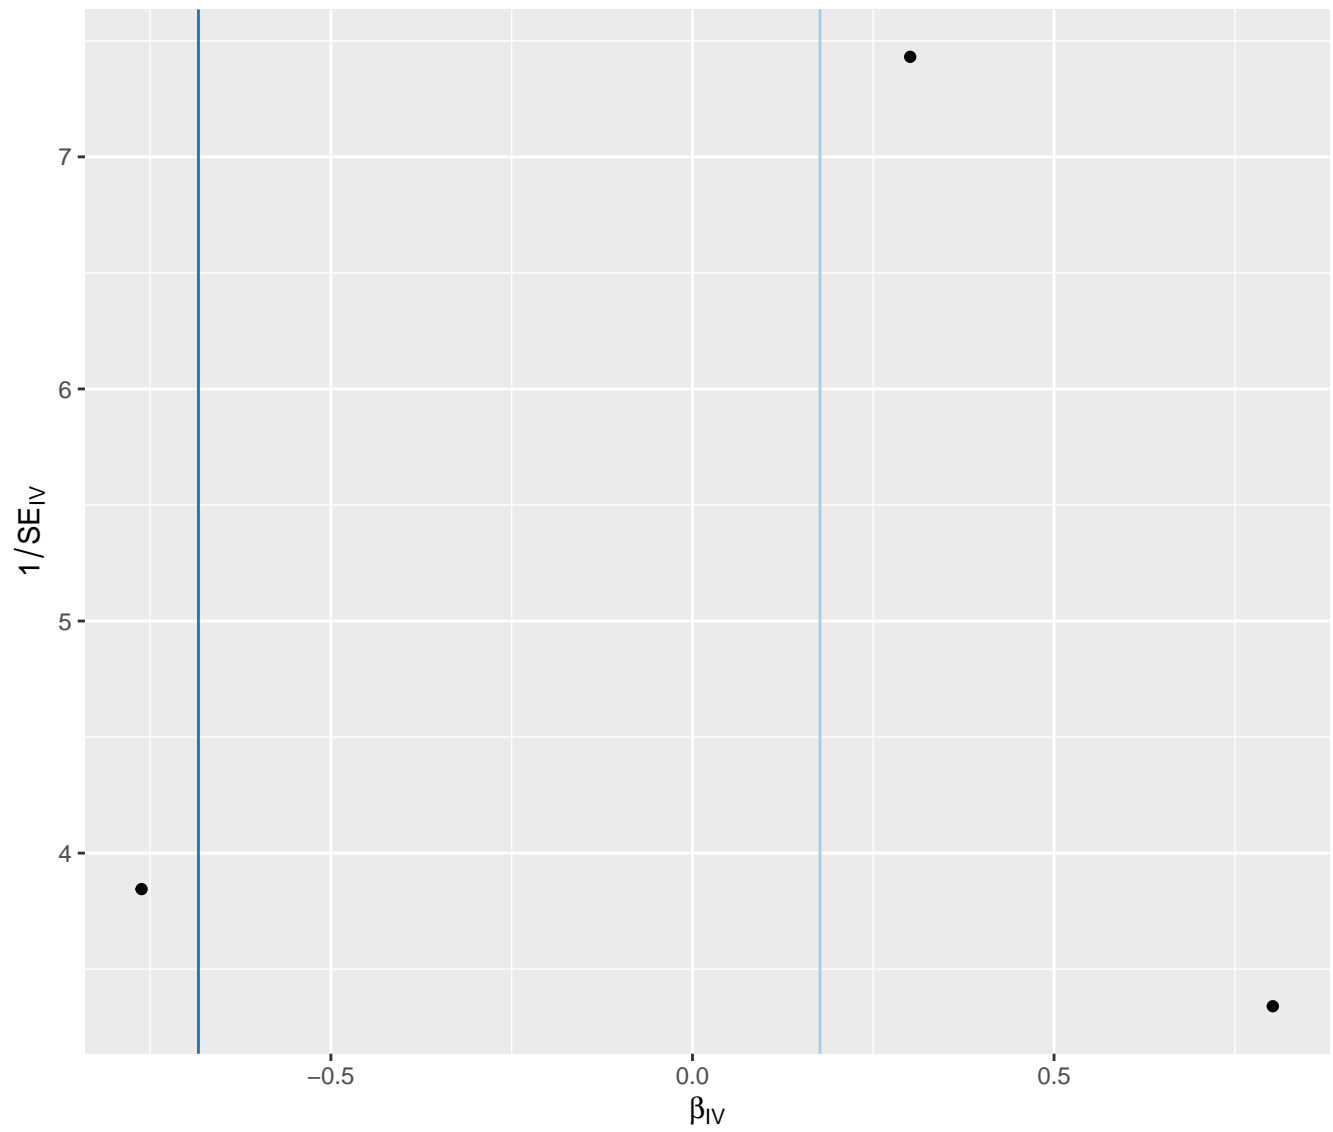

### MR Method

- Inverse variance weighted
- MR Egger

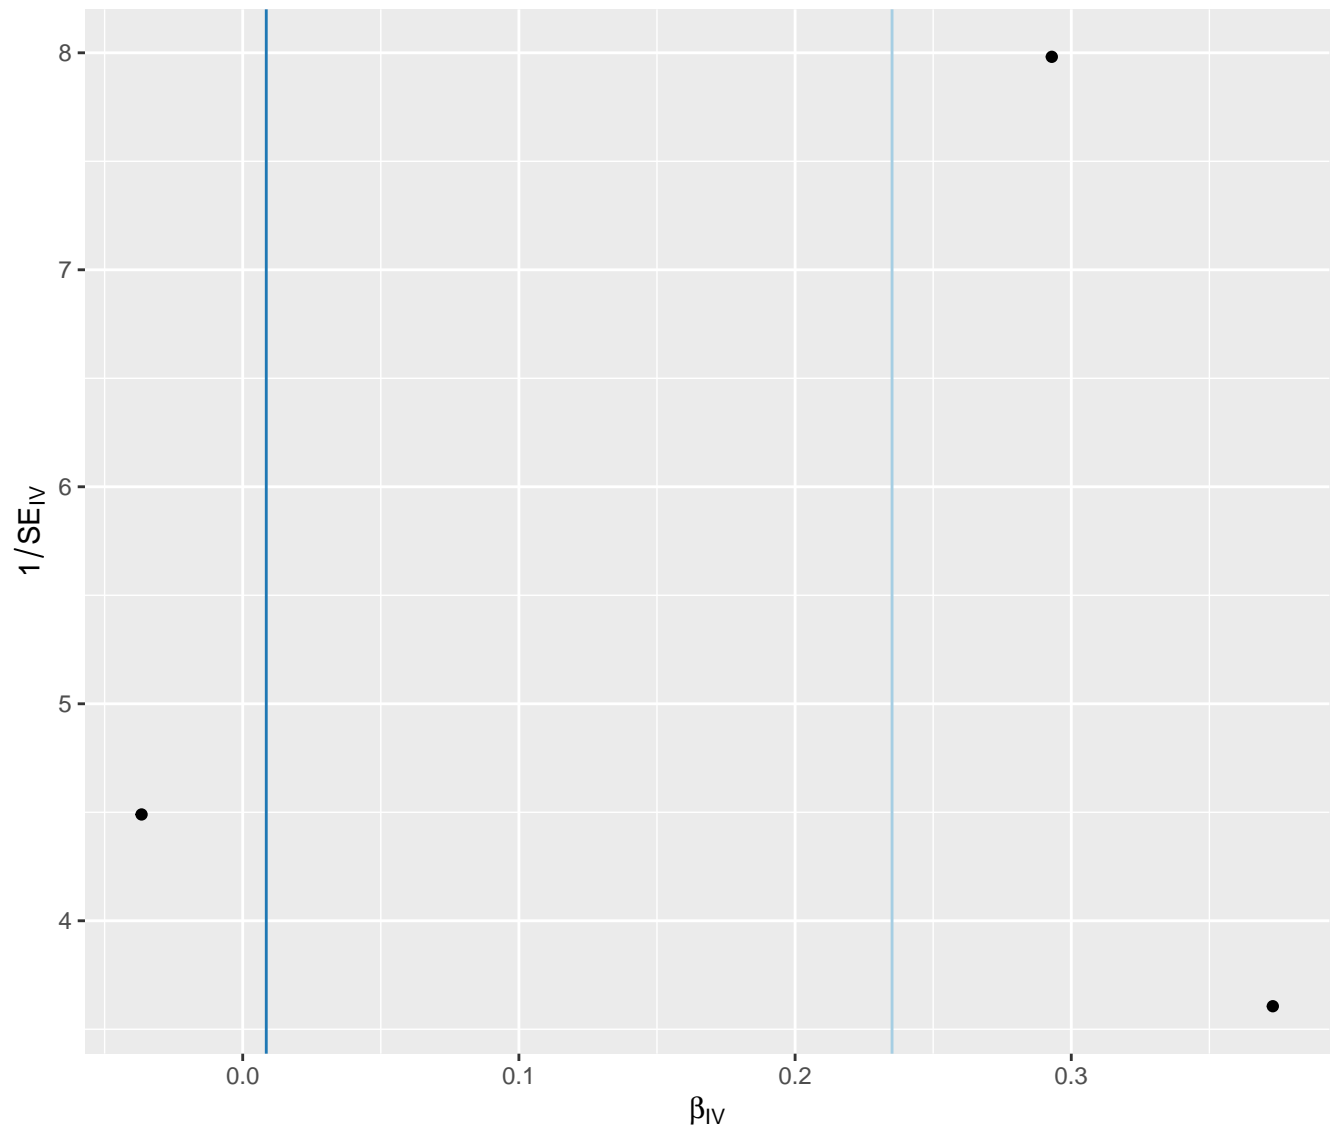

### MR Method

- Inverse variance weighted
- MR Egger

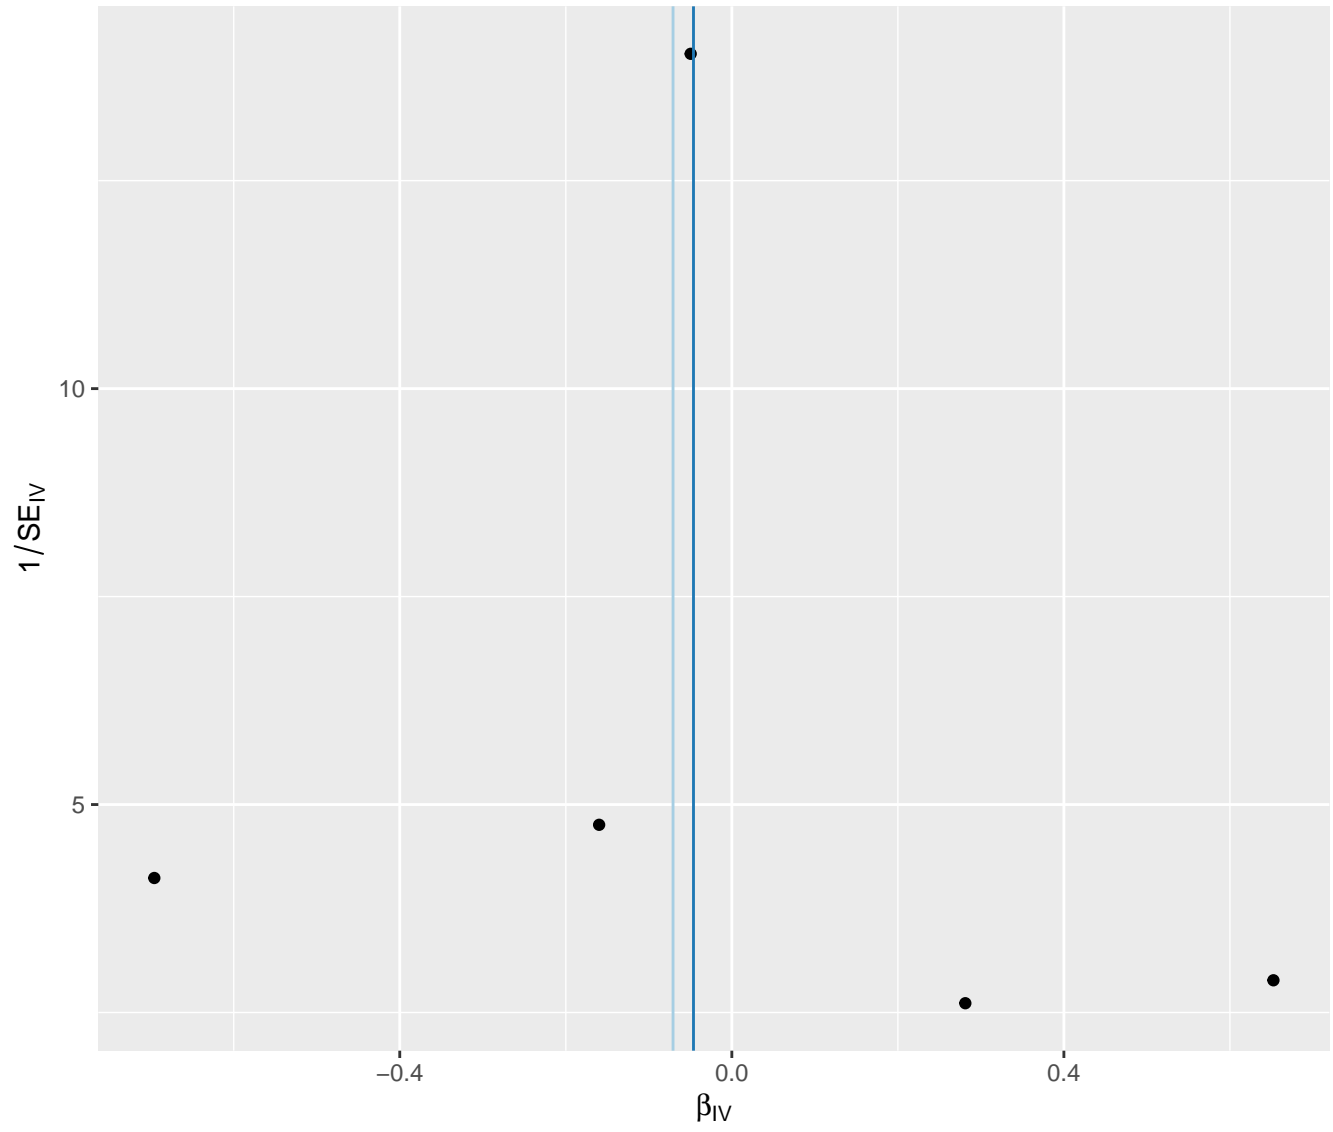

### MR Method

- Inverse variance weighted
- MR Egger

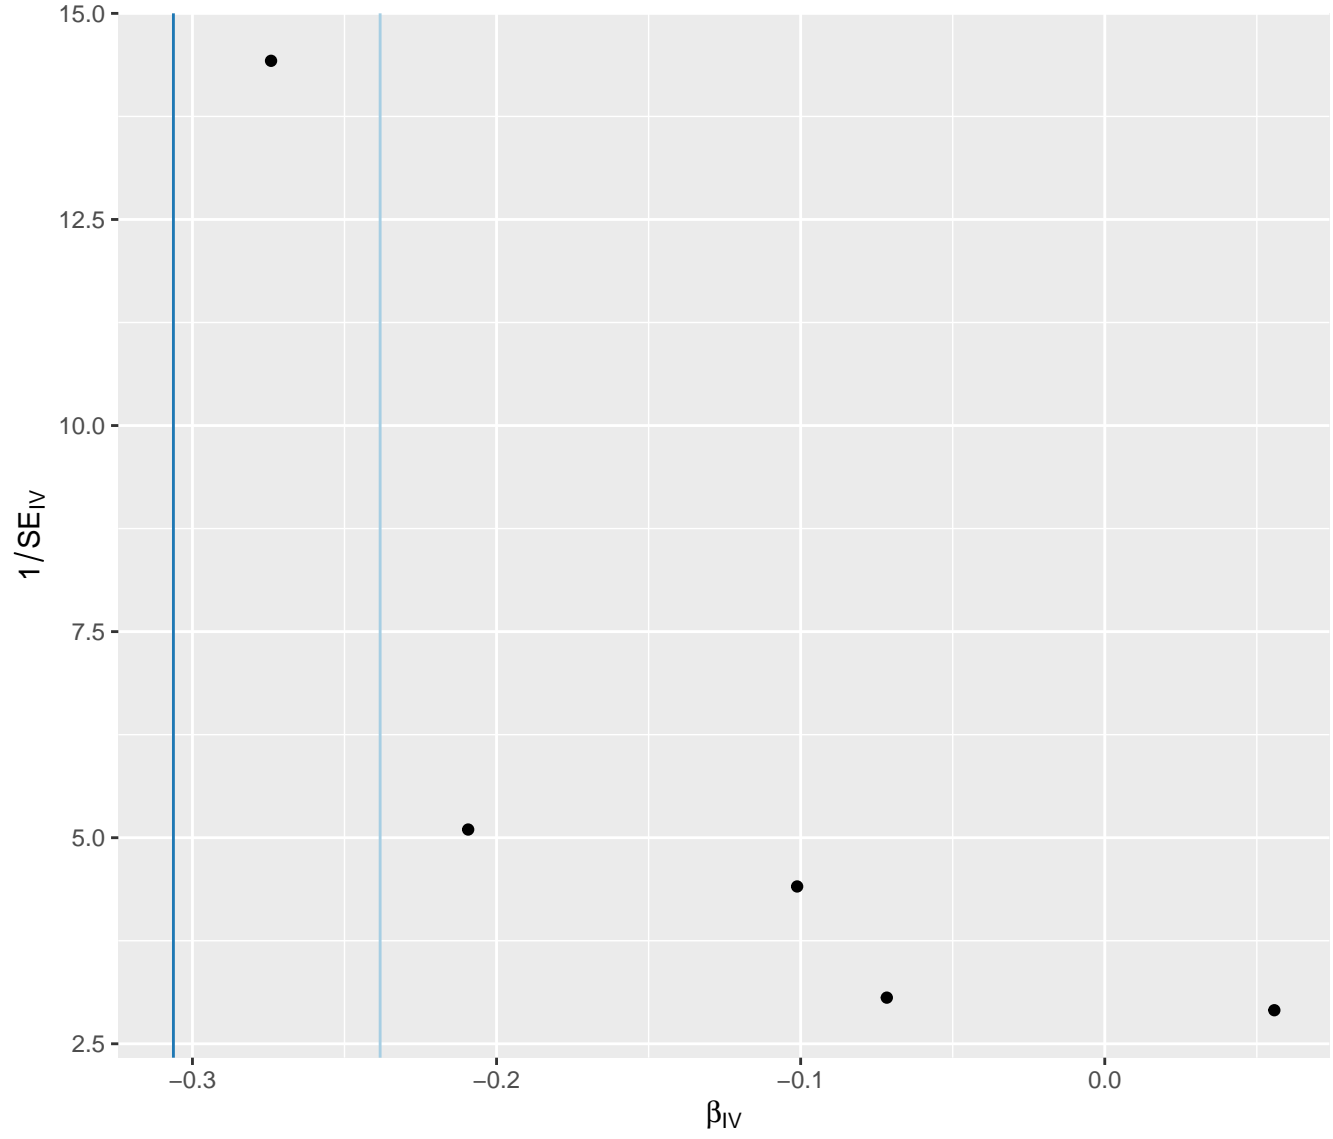

### MR Method

- Inverse variance weighted
- MR Egger

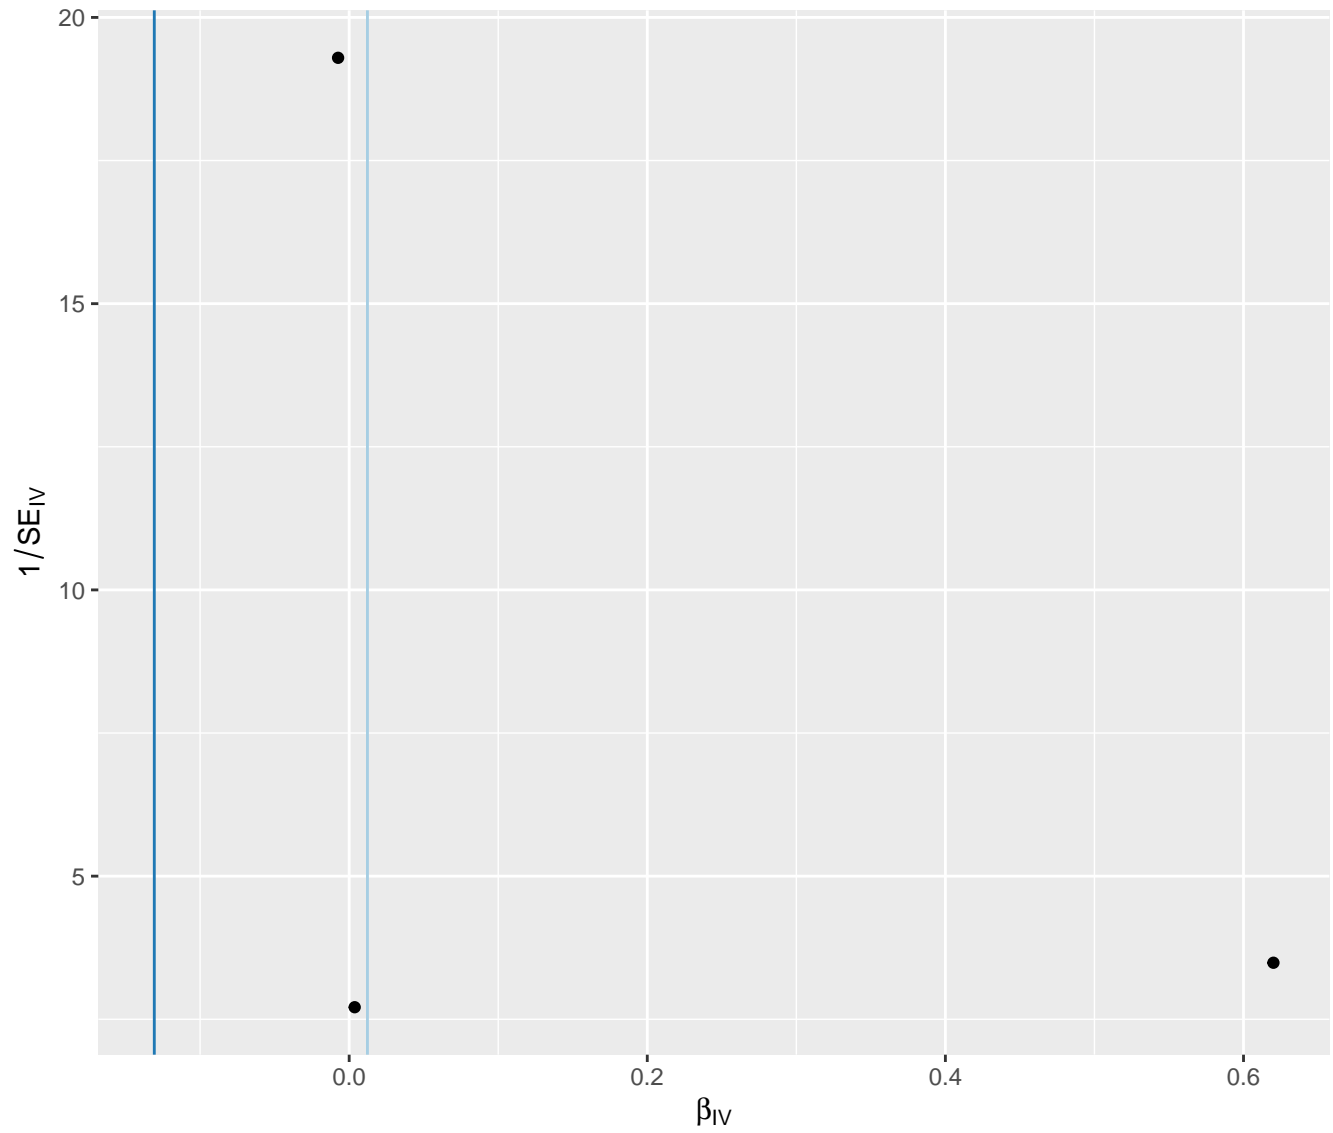

### MR Method

- Inverse variance weighted
- MR Egger

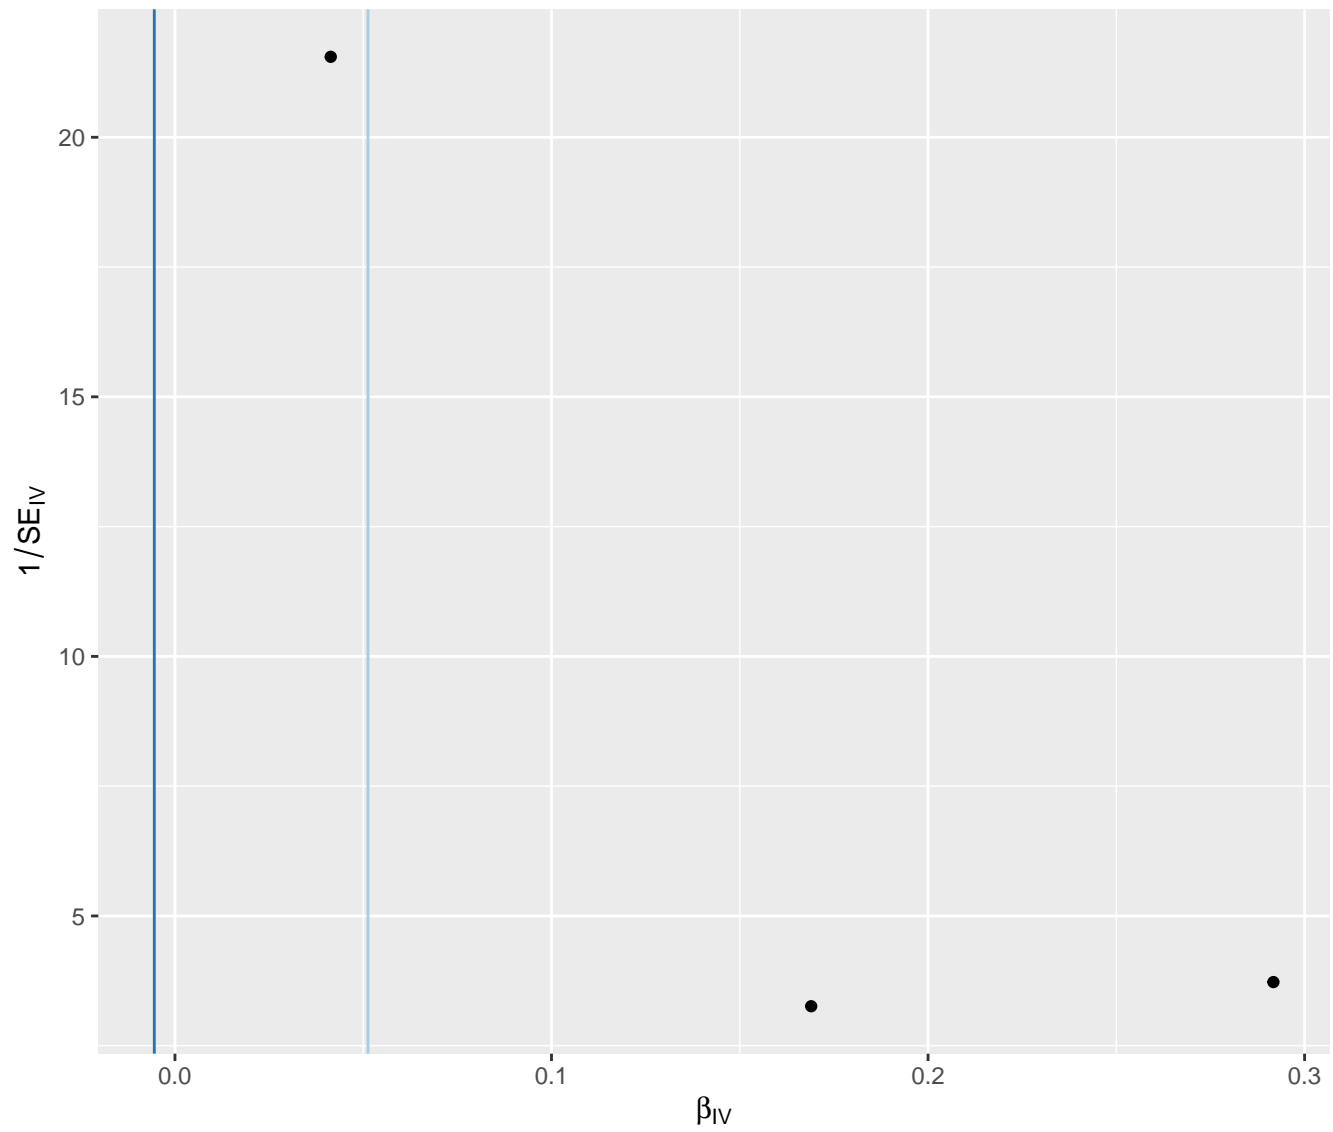

### MR Method

- Inverse variance weighted
- MR Egger

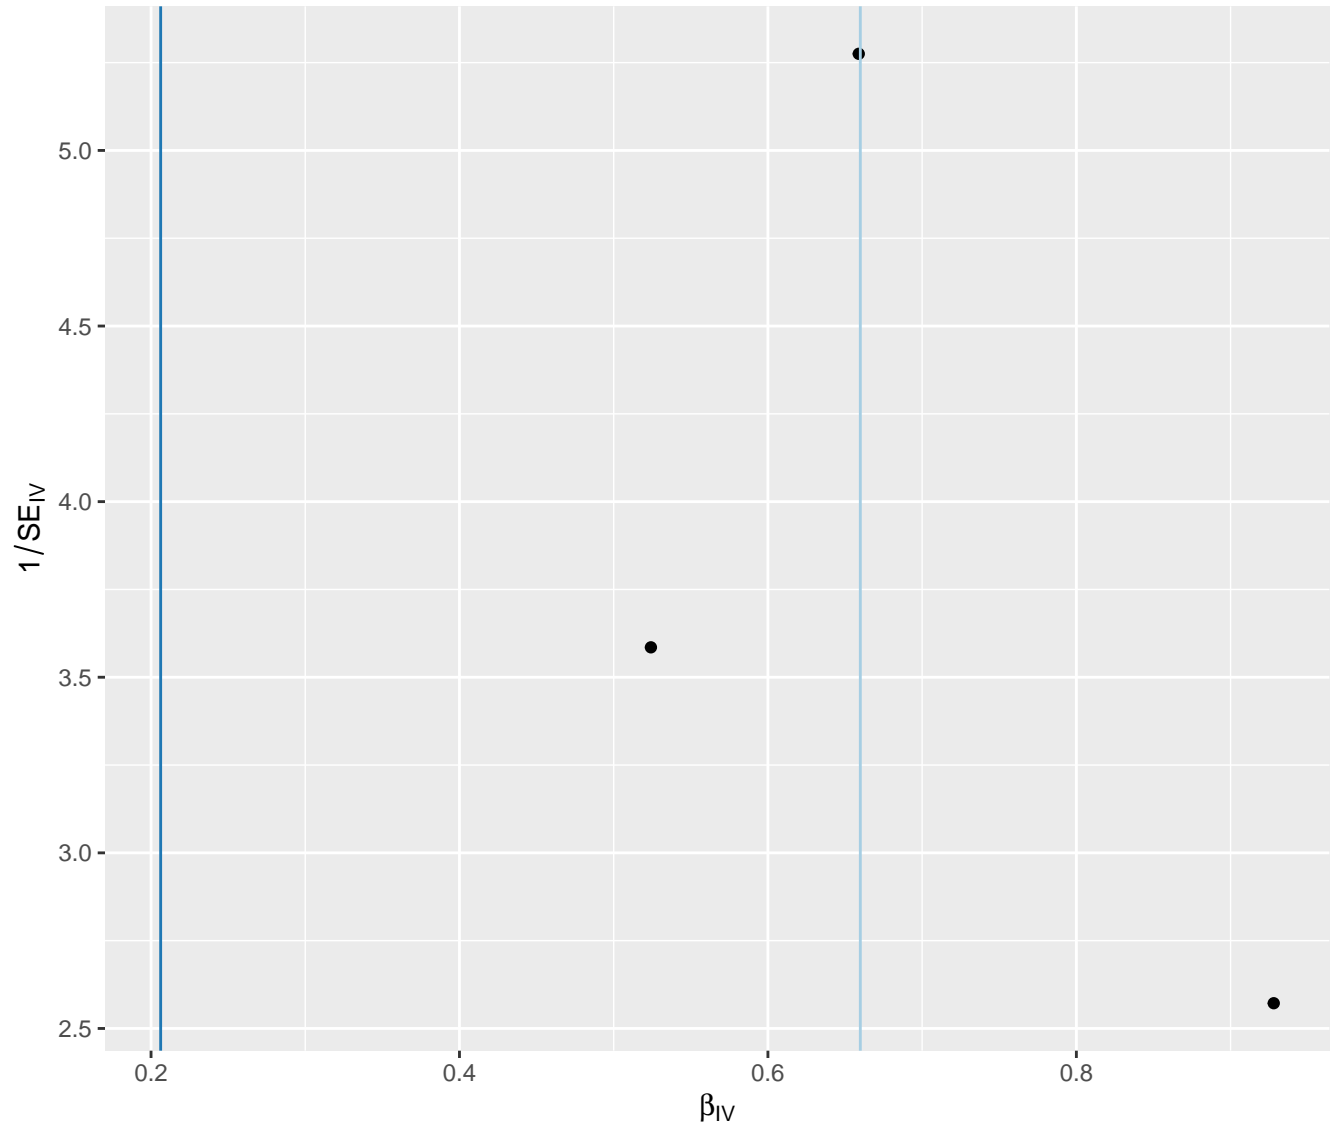

### MR Method

- Inverse variance weighted
- MR Egger

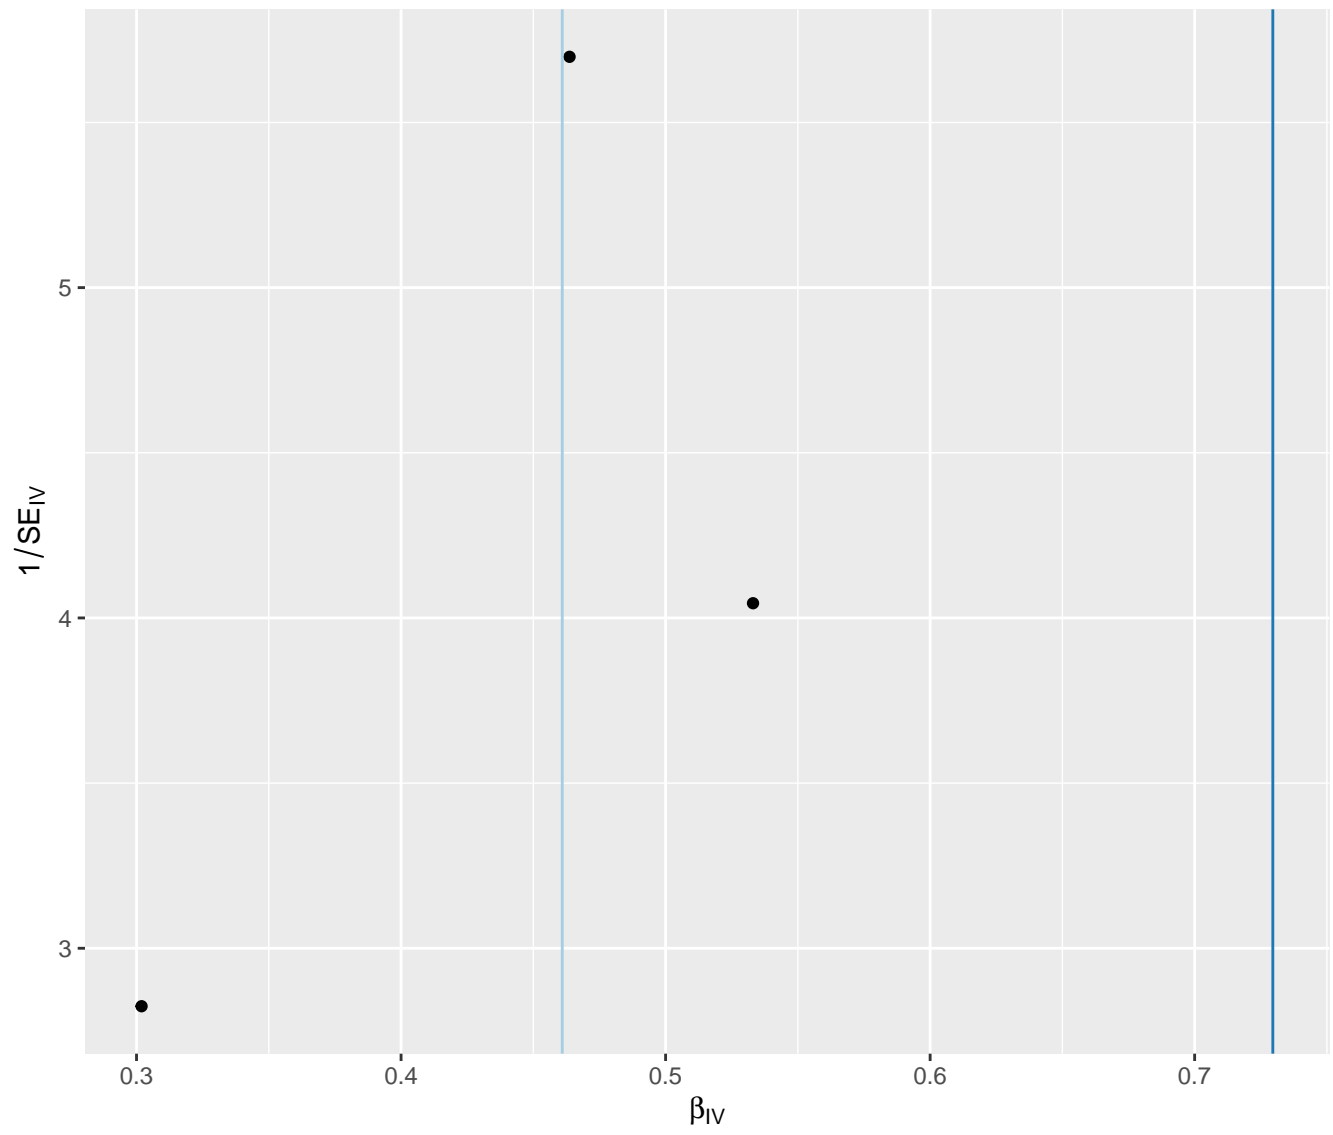



### MR Method

- Inverse variance weighted
- MR Egger

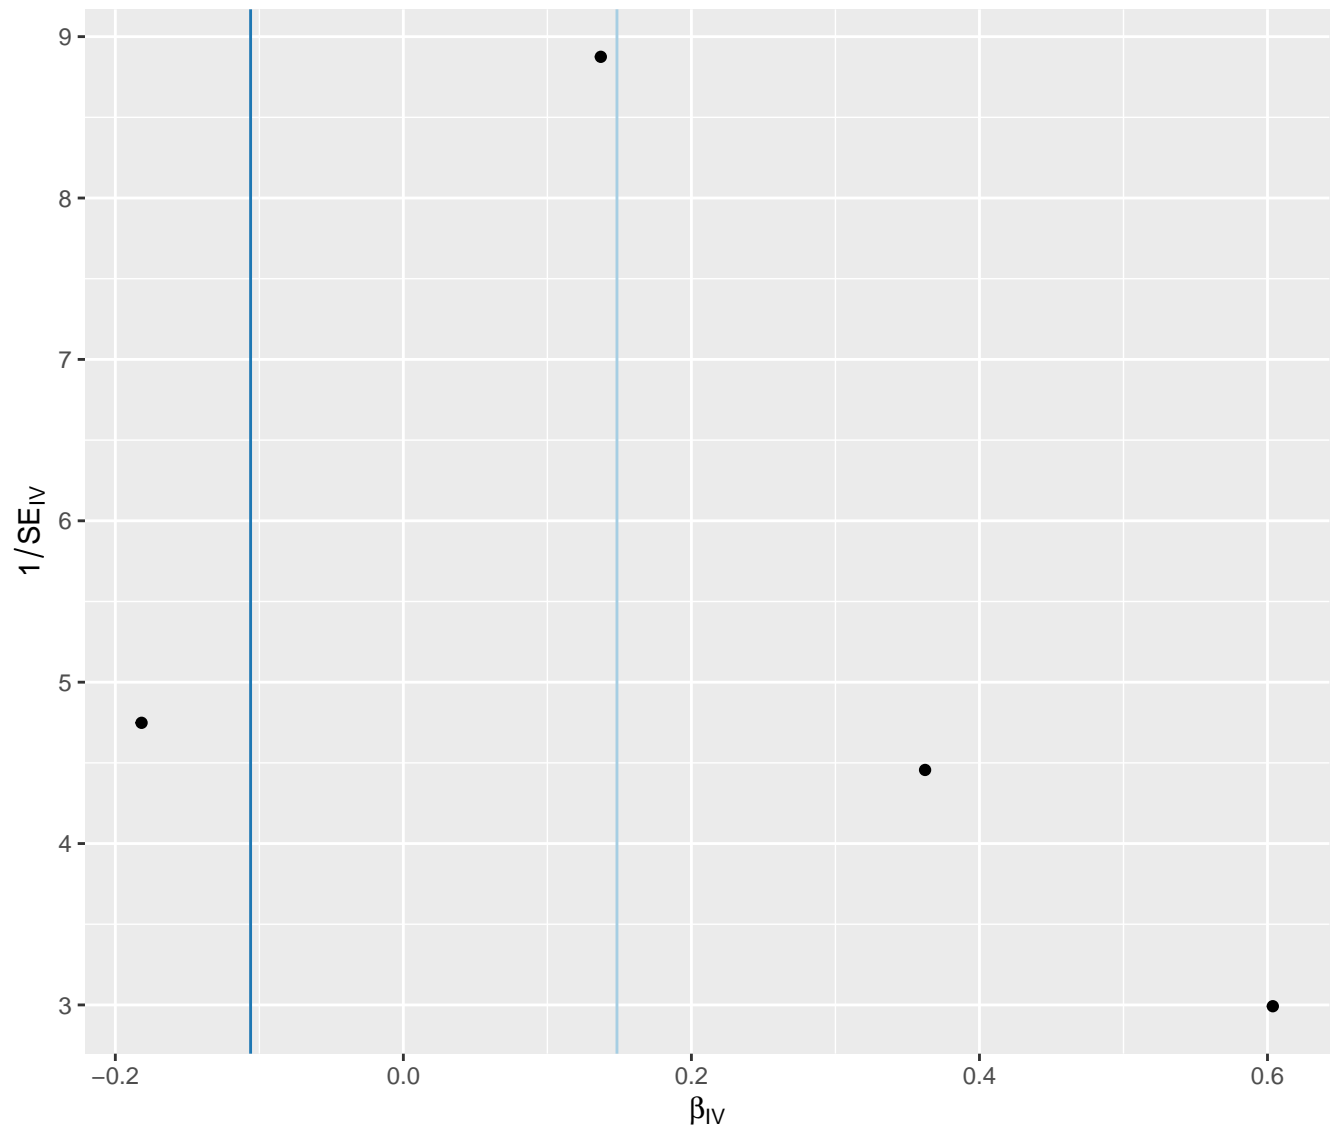

### MR Method

- Inverse variance weighted
- MR Egger

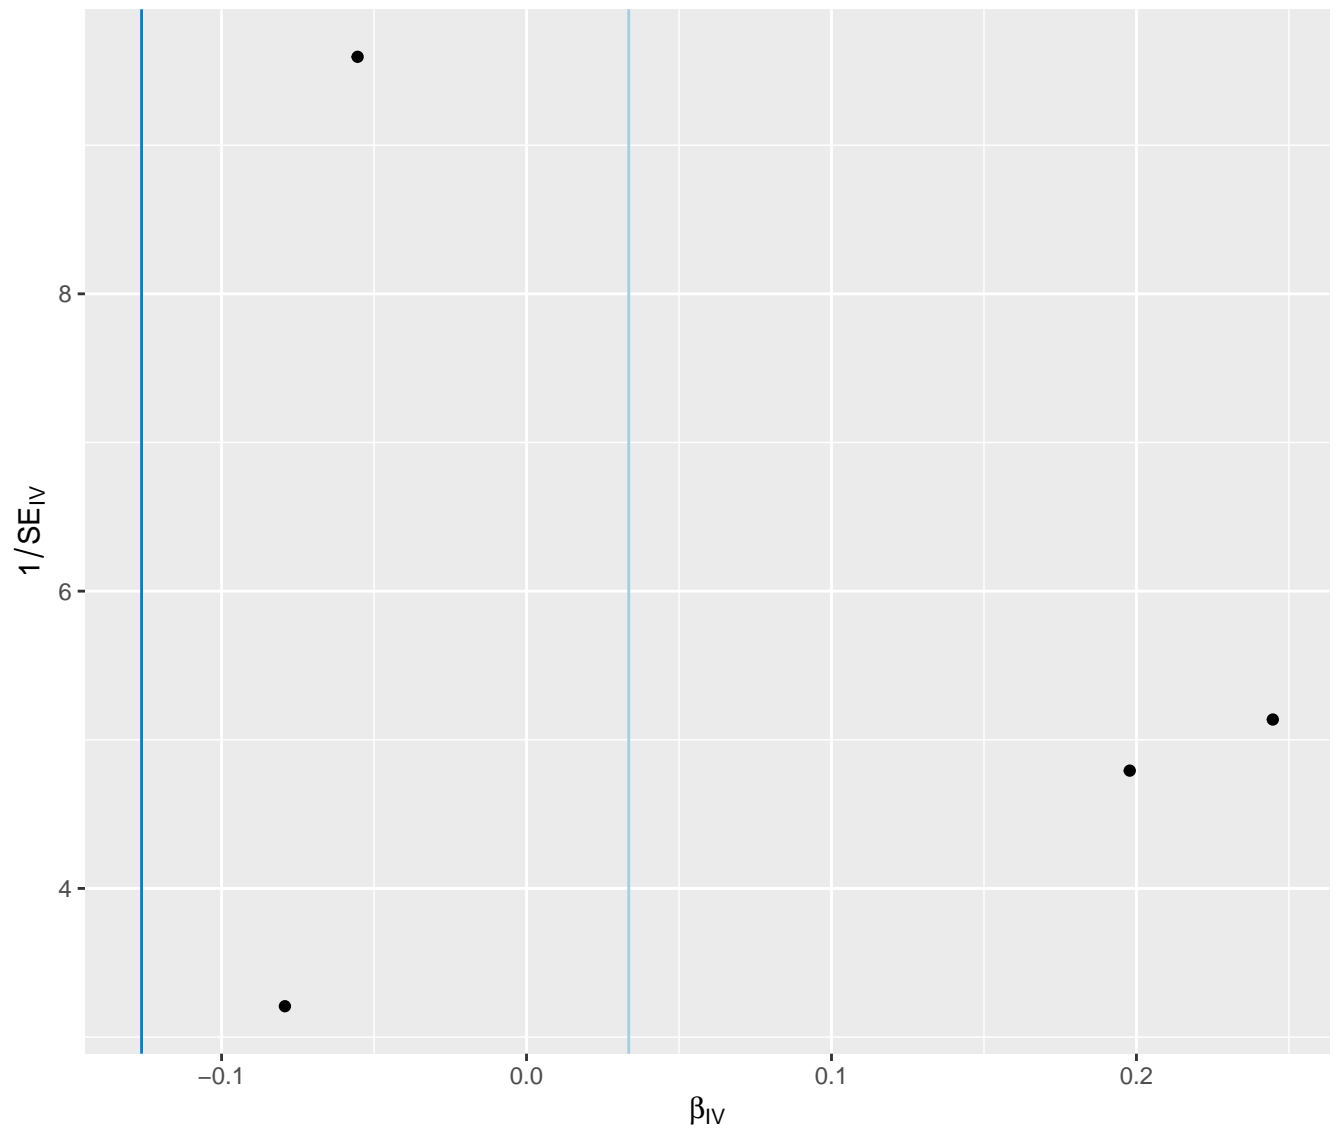

### MR Method

- Inverse variance weighted
- MR Egger

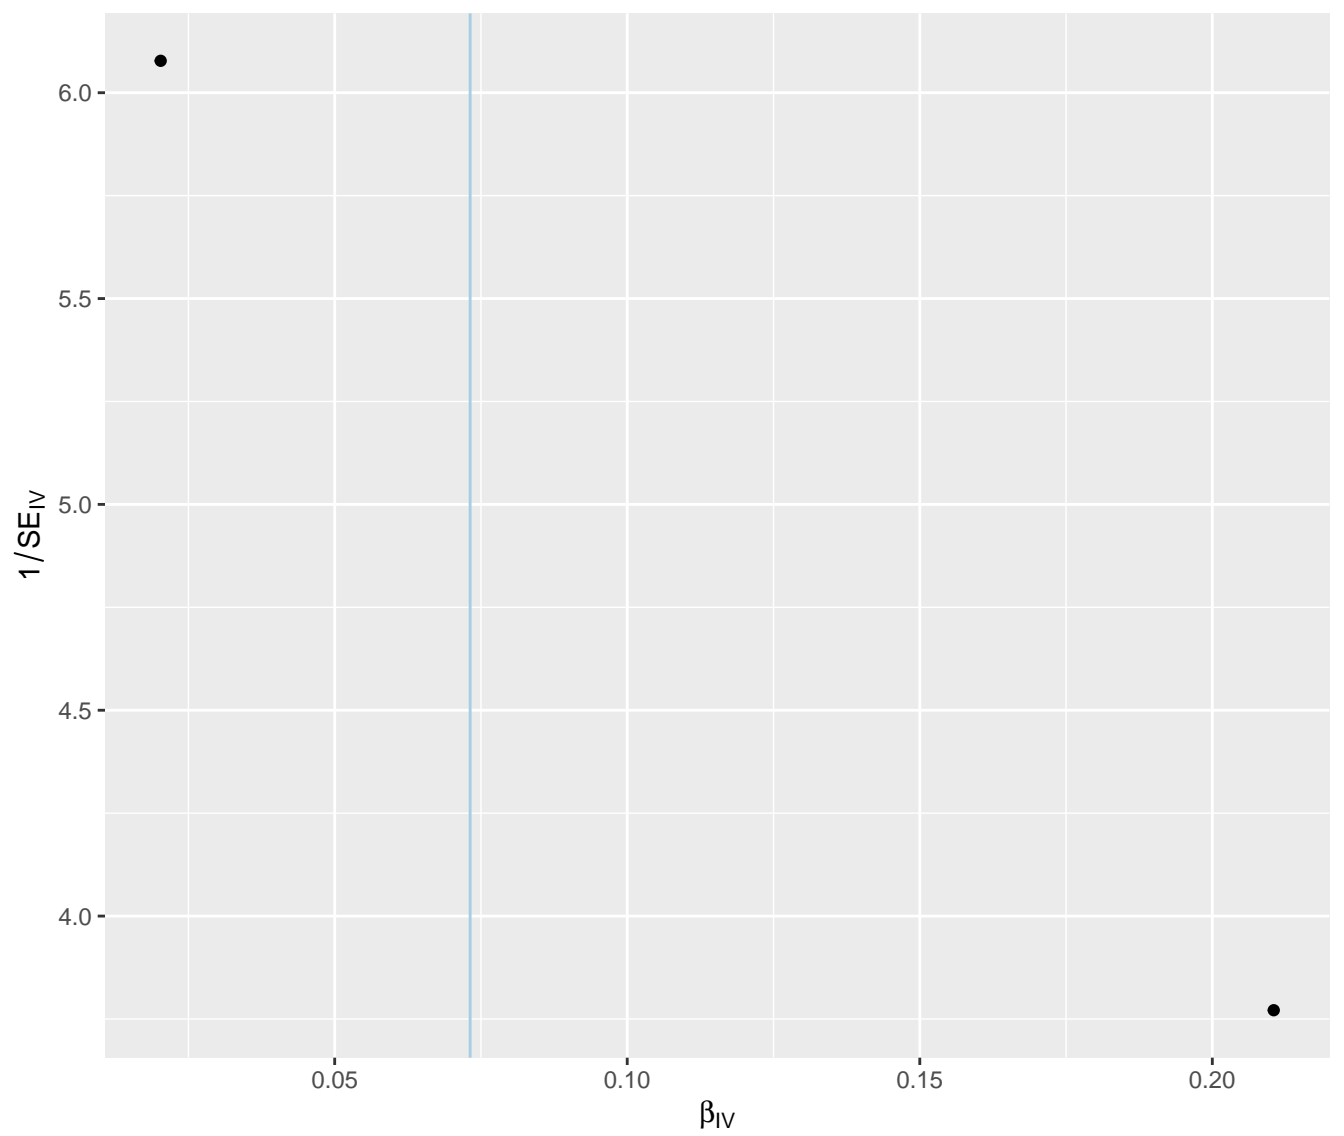

### MR Method

- Inverse variance weighted
- MR Egger

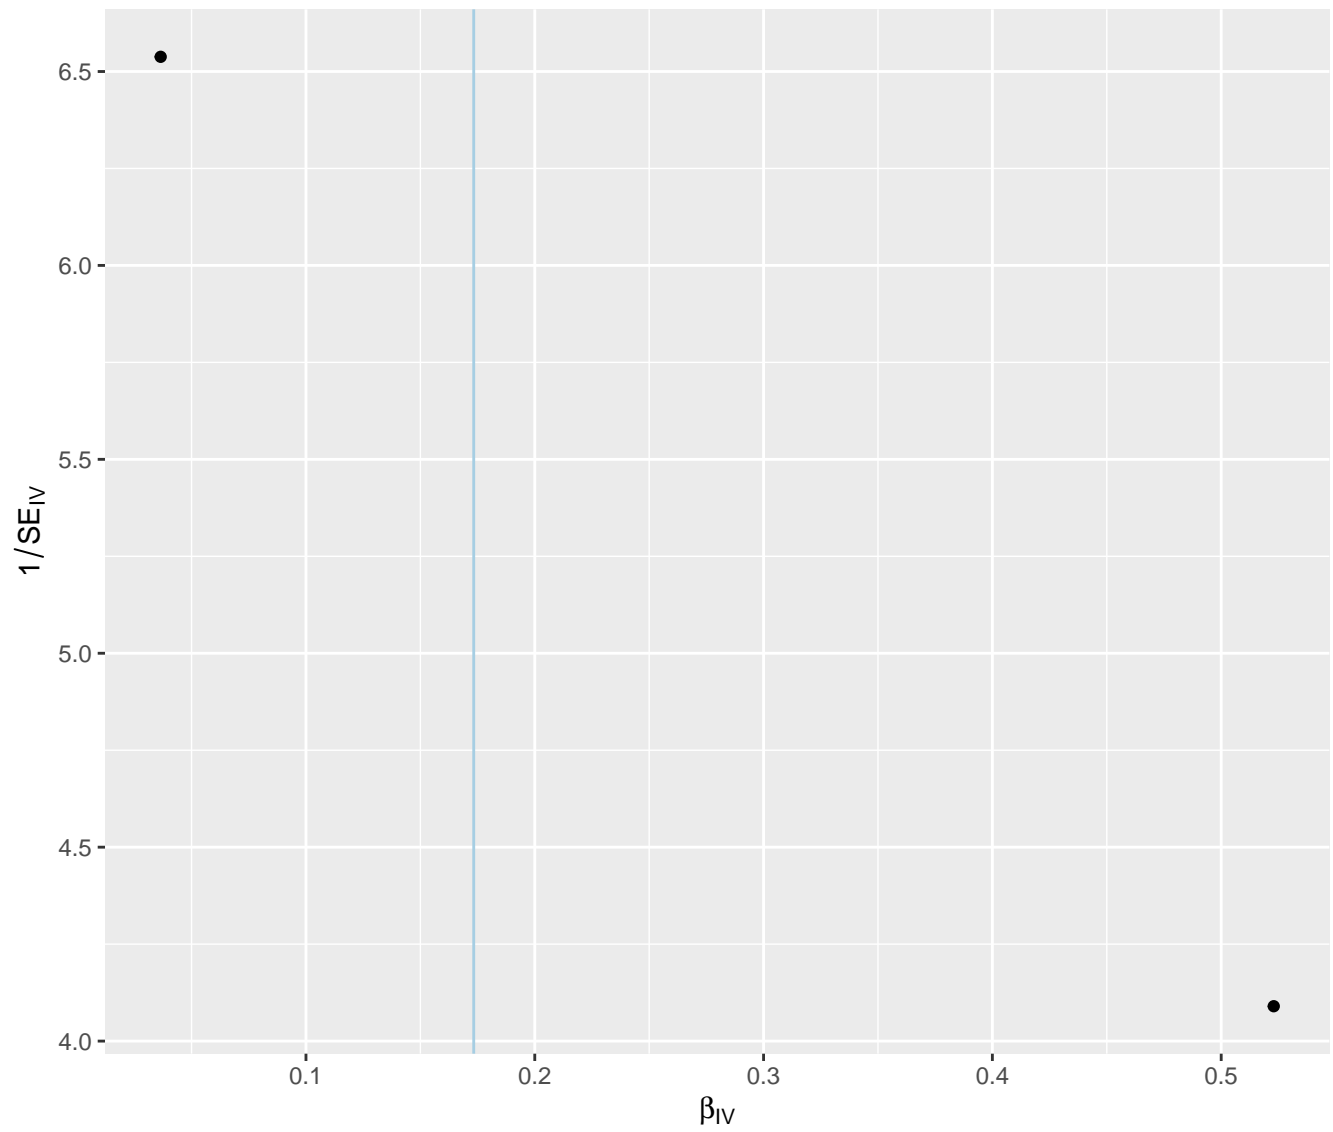

MR Method

- Inverse variance weighted
- MR Egger

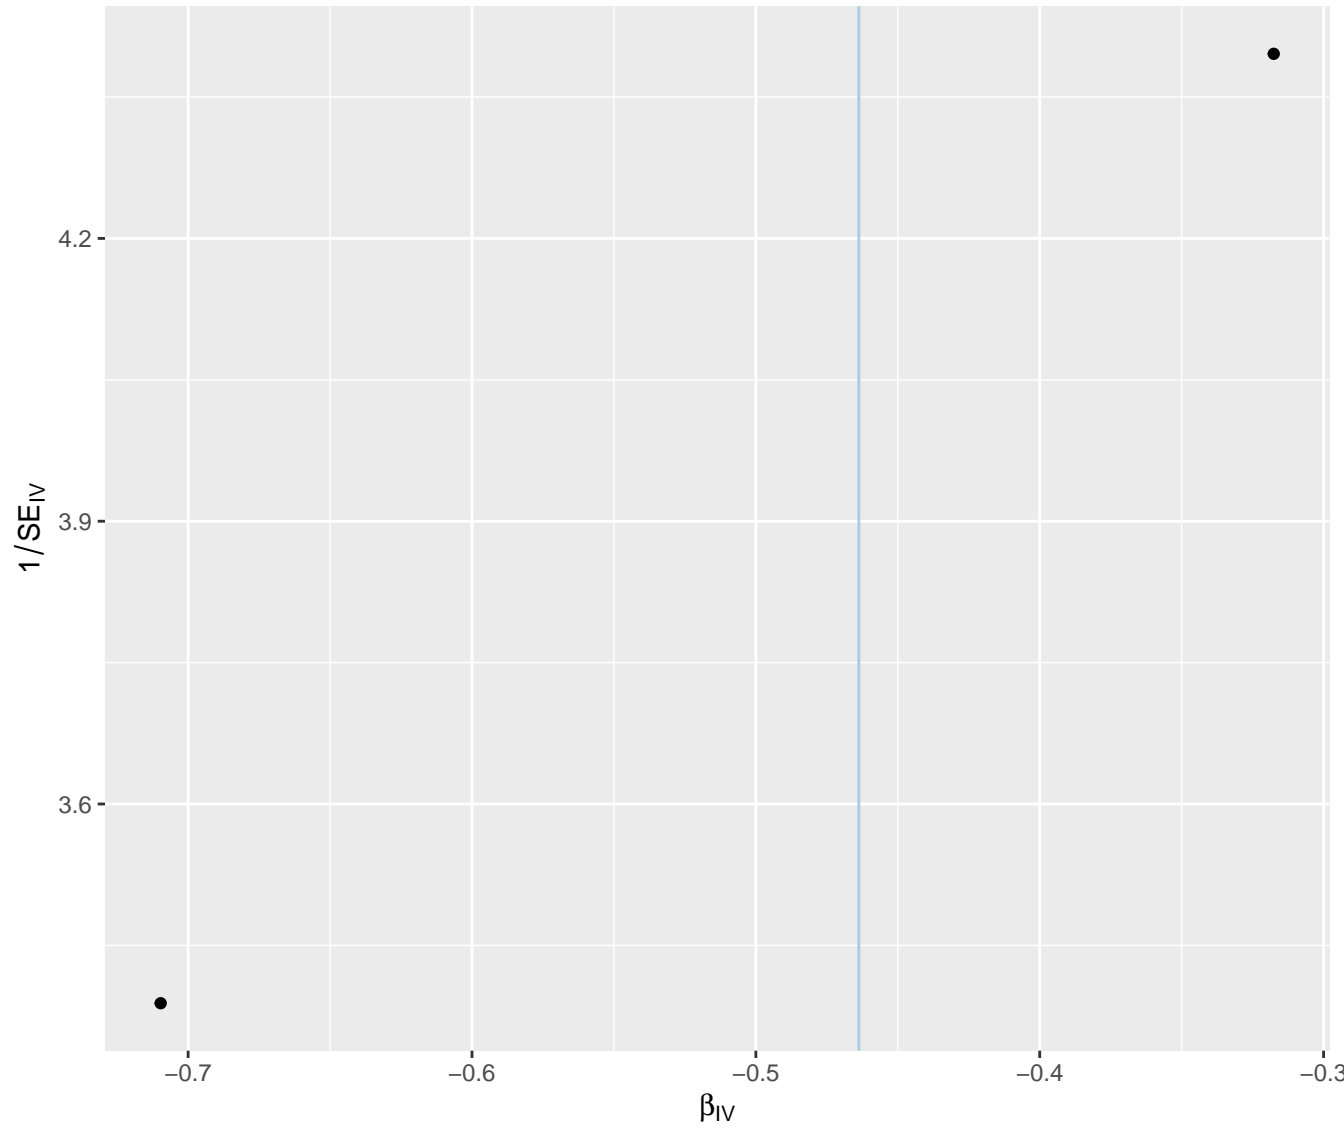

MR Method

- Inverse variance weighted
- MR Egger

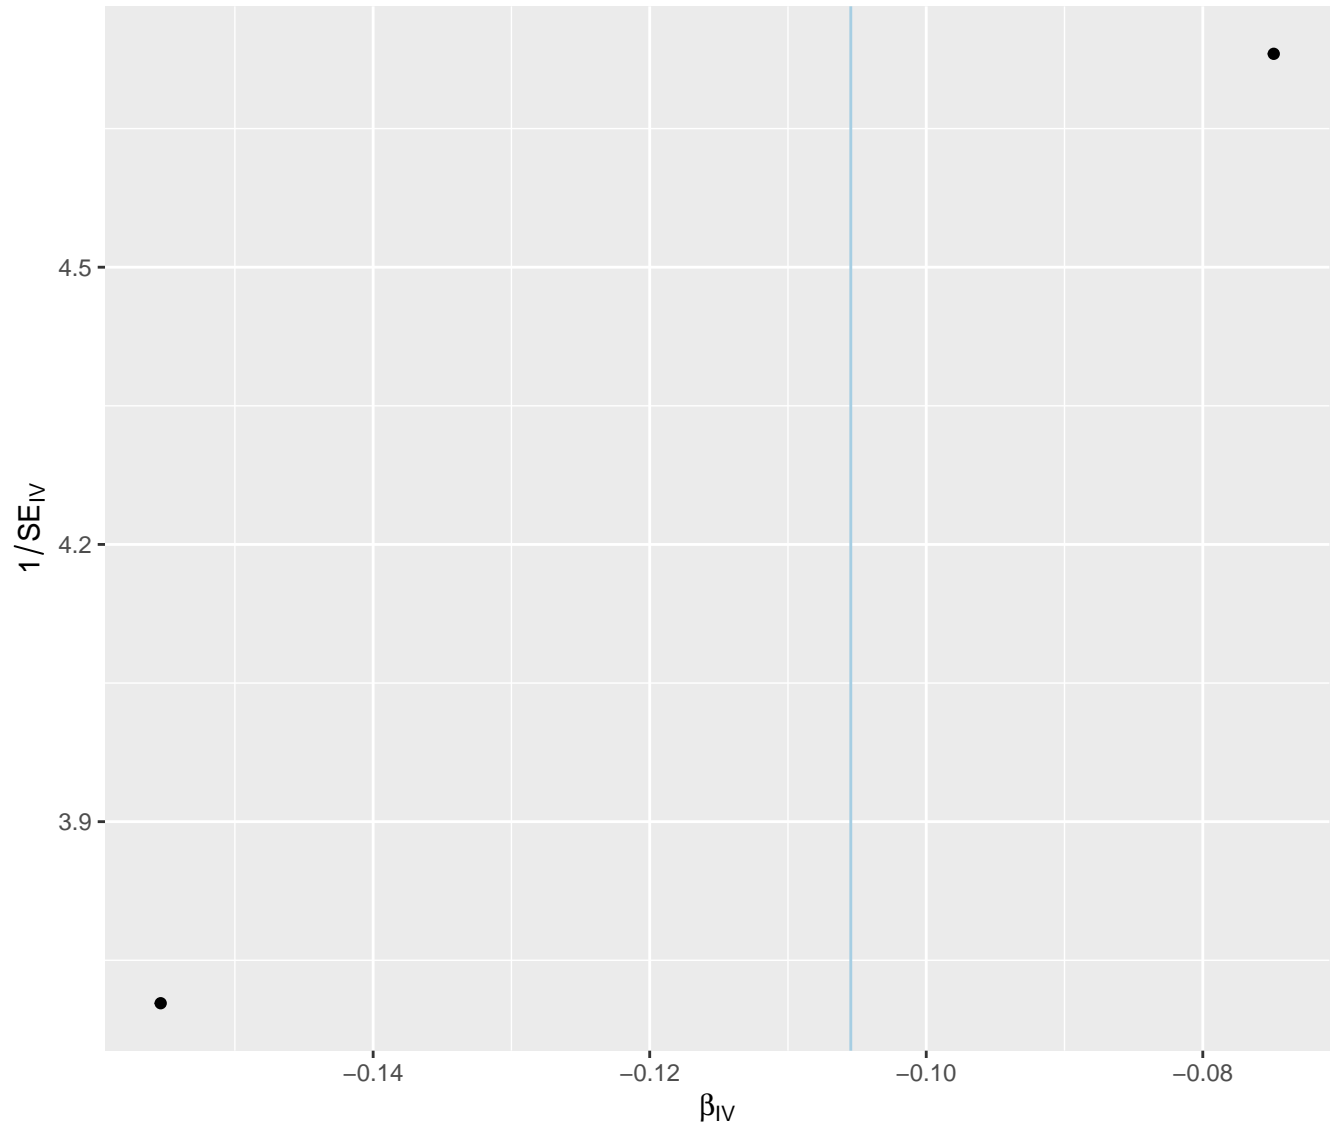

### MR Method

- Inverse variance weighted
- MR Egger

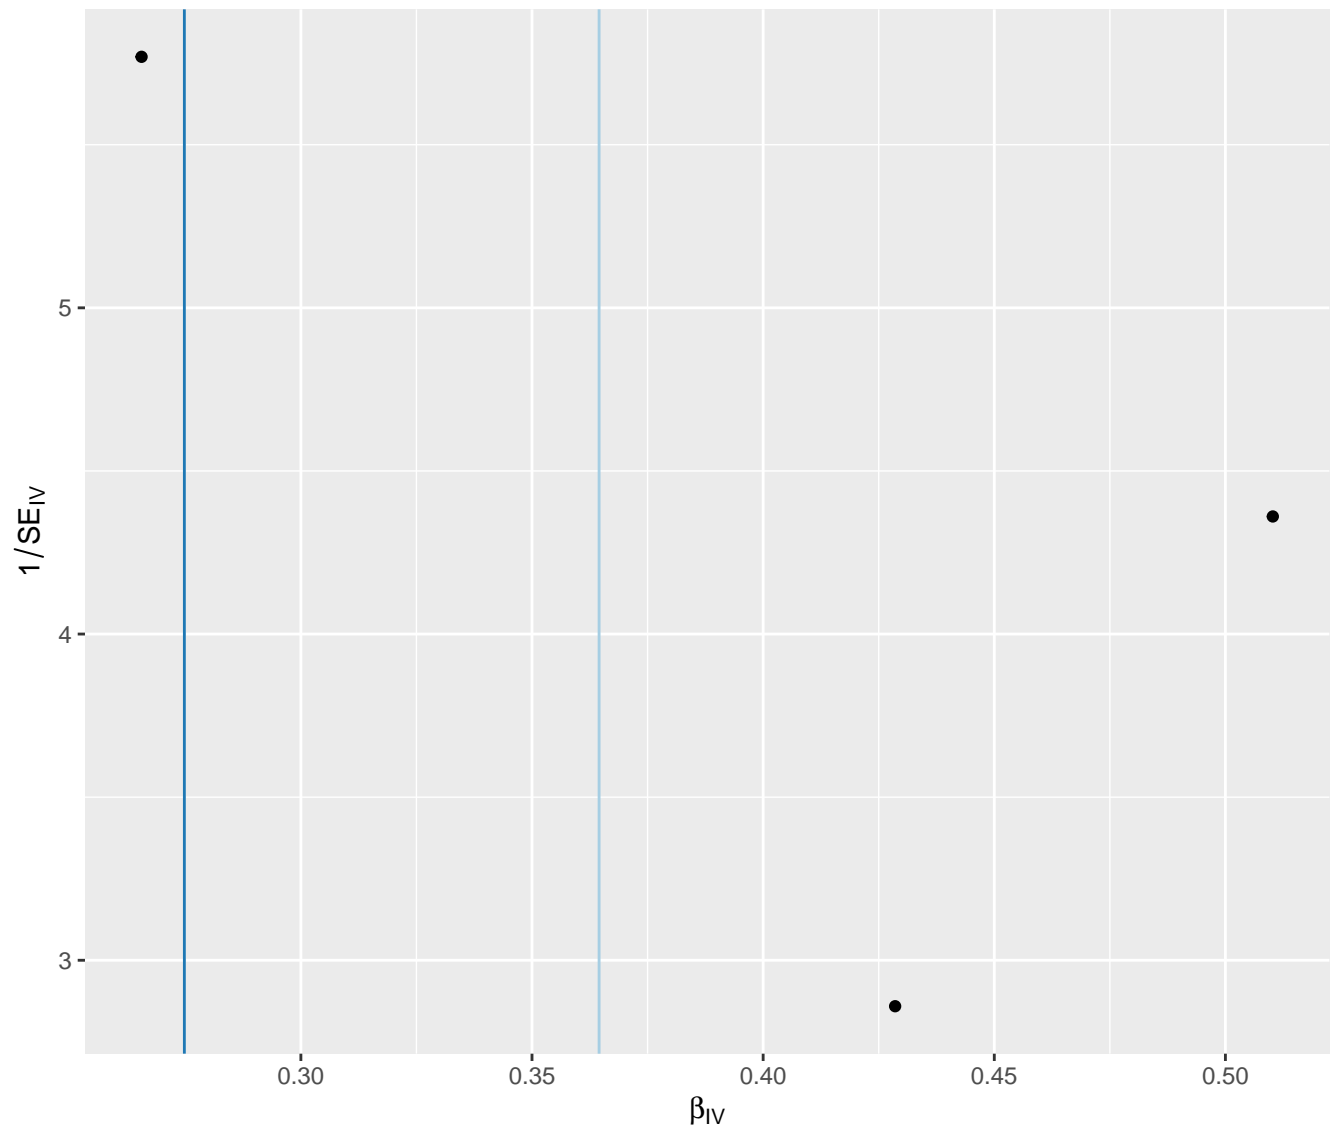

### MR Method

- Inverse variance weighted
- MR Egger

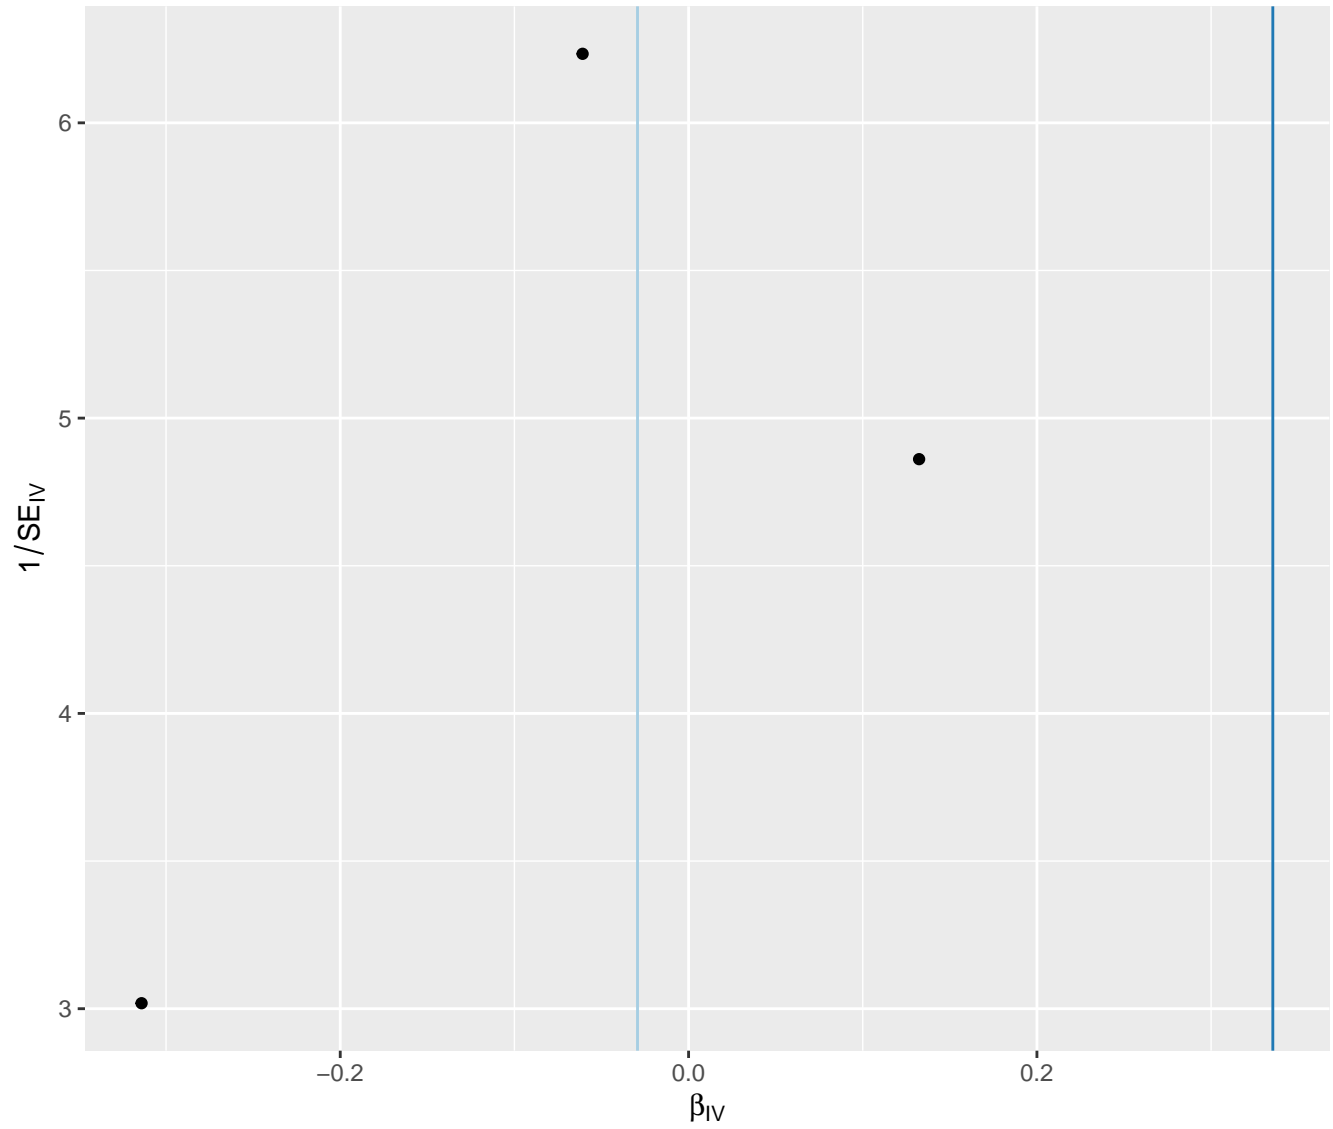



### MR Method

- Inverse variance weighted
- MR Egger

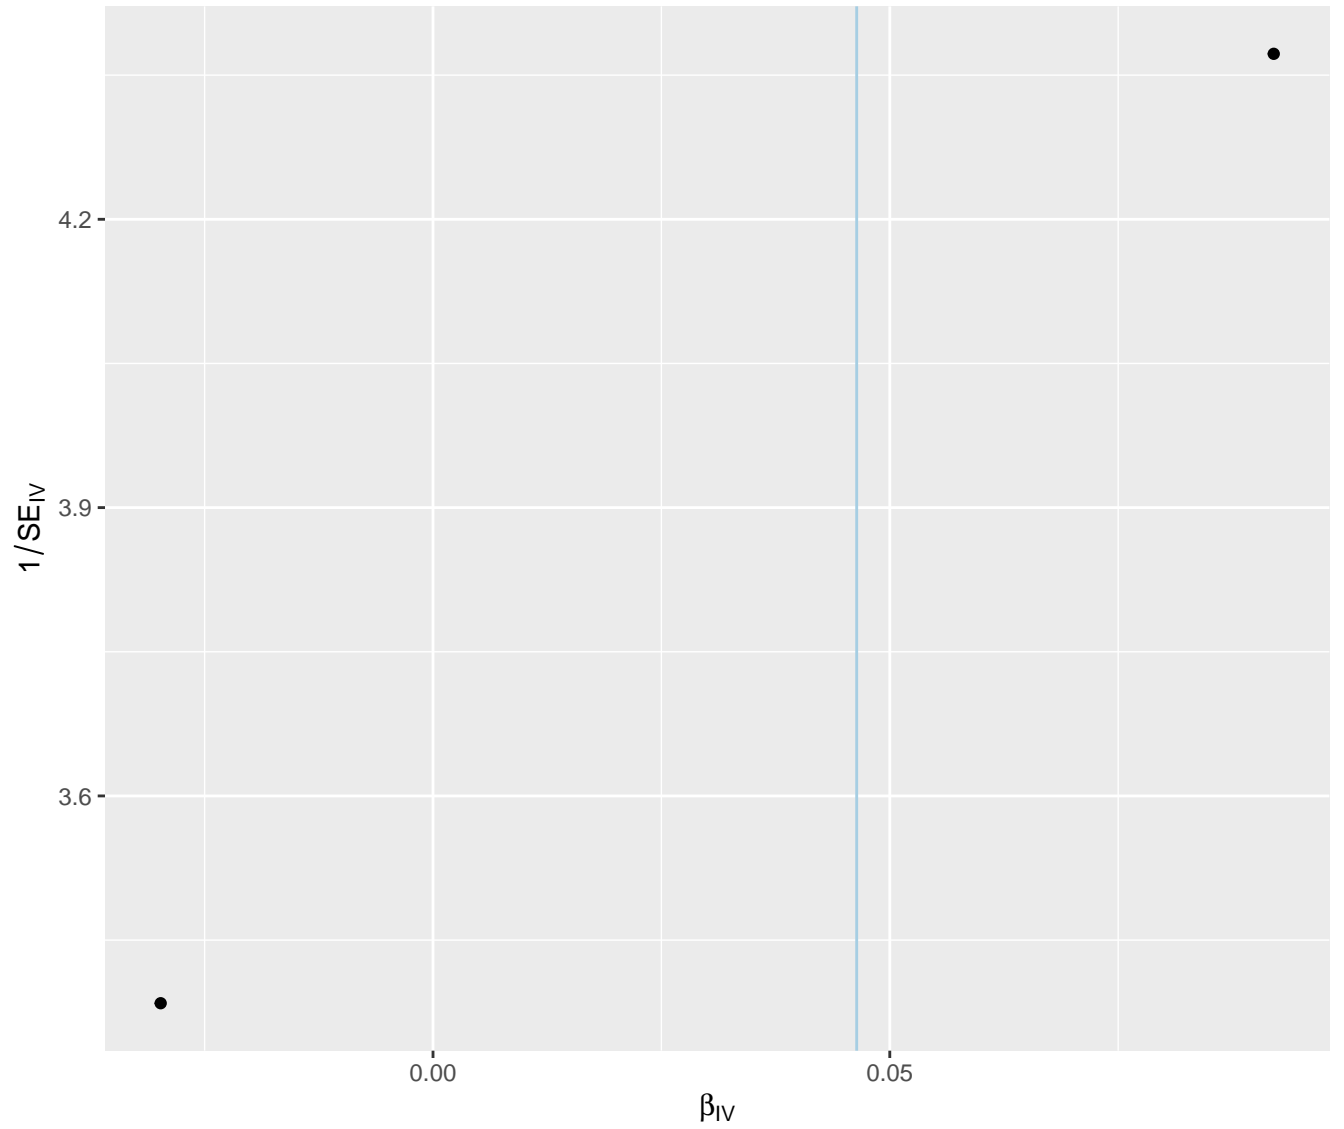

### MR Method

- Inverse variance weighted
- MR Egger

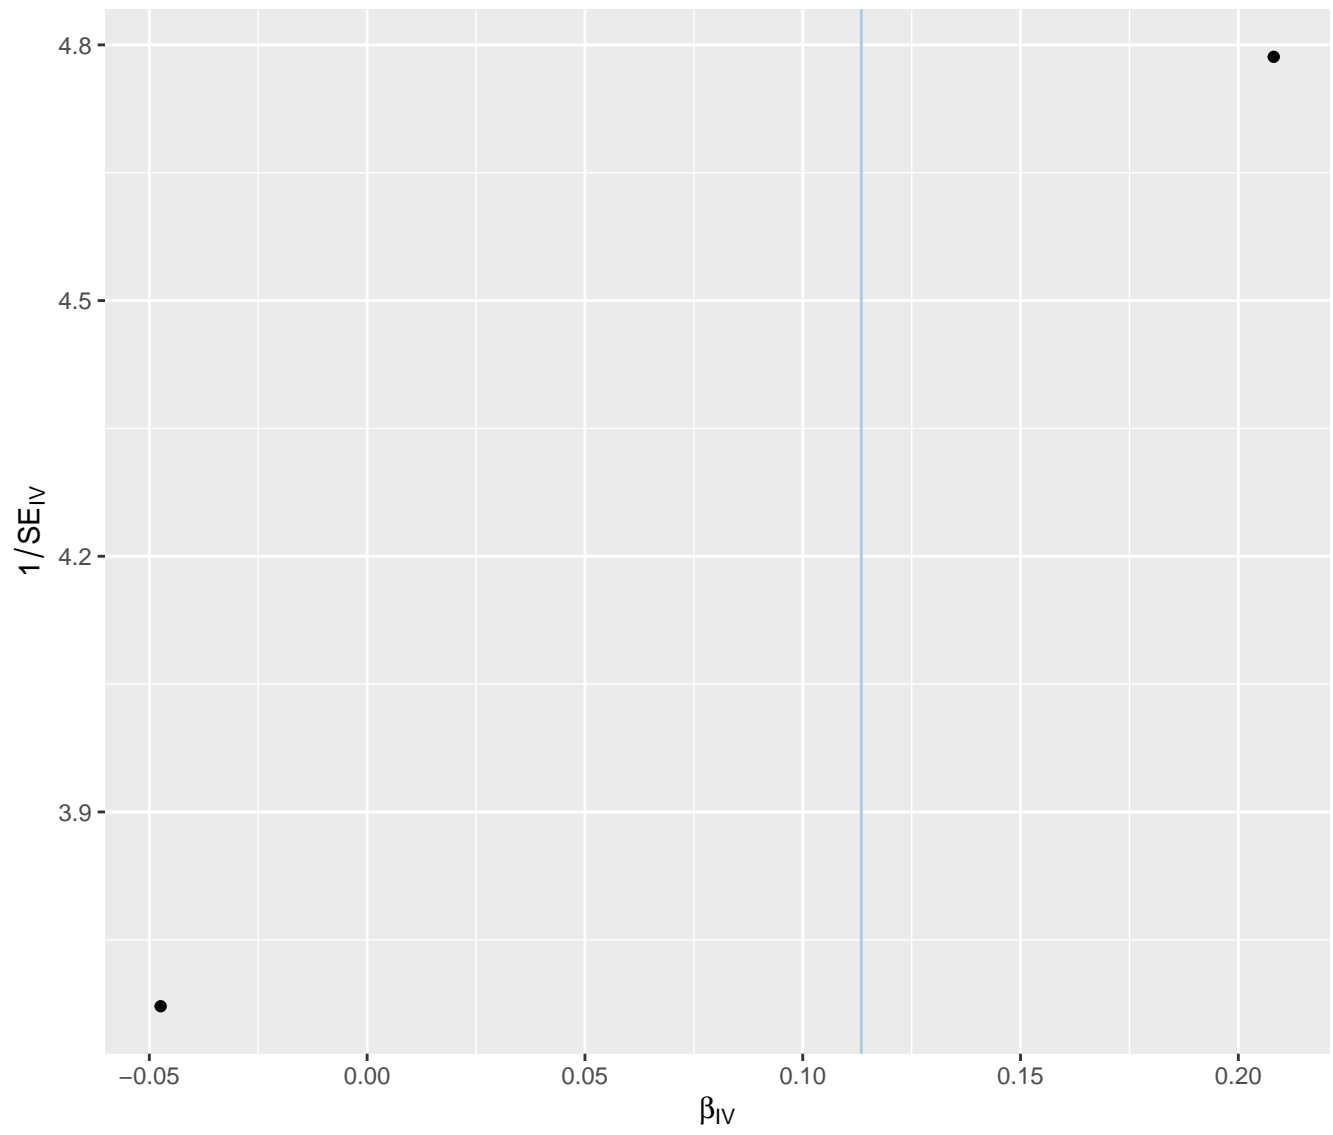

### MR Method

- Inverse variance weighted
- MR Egger

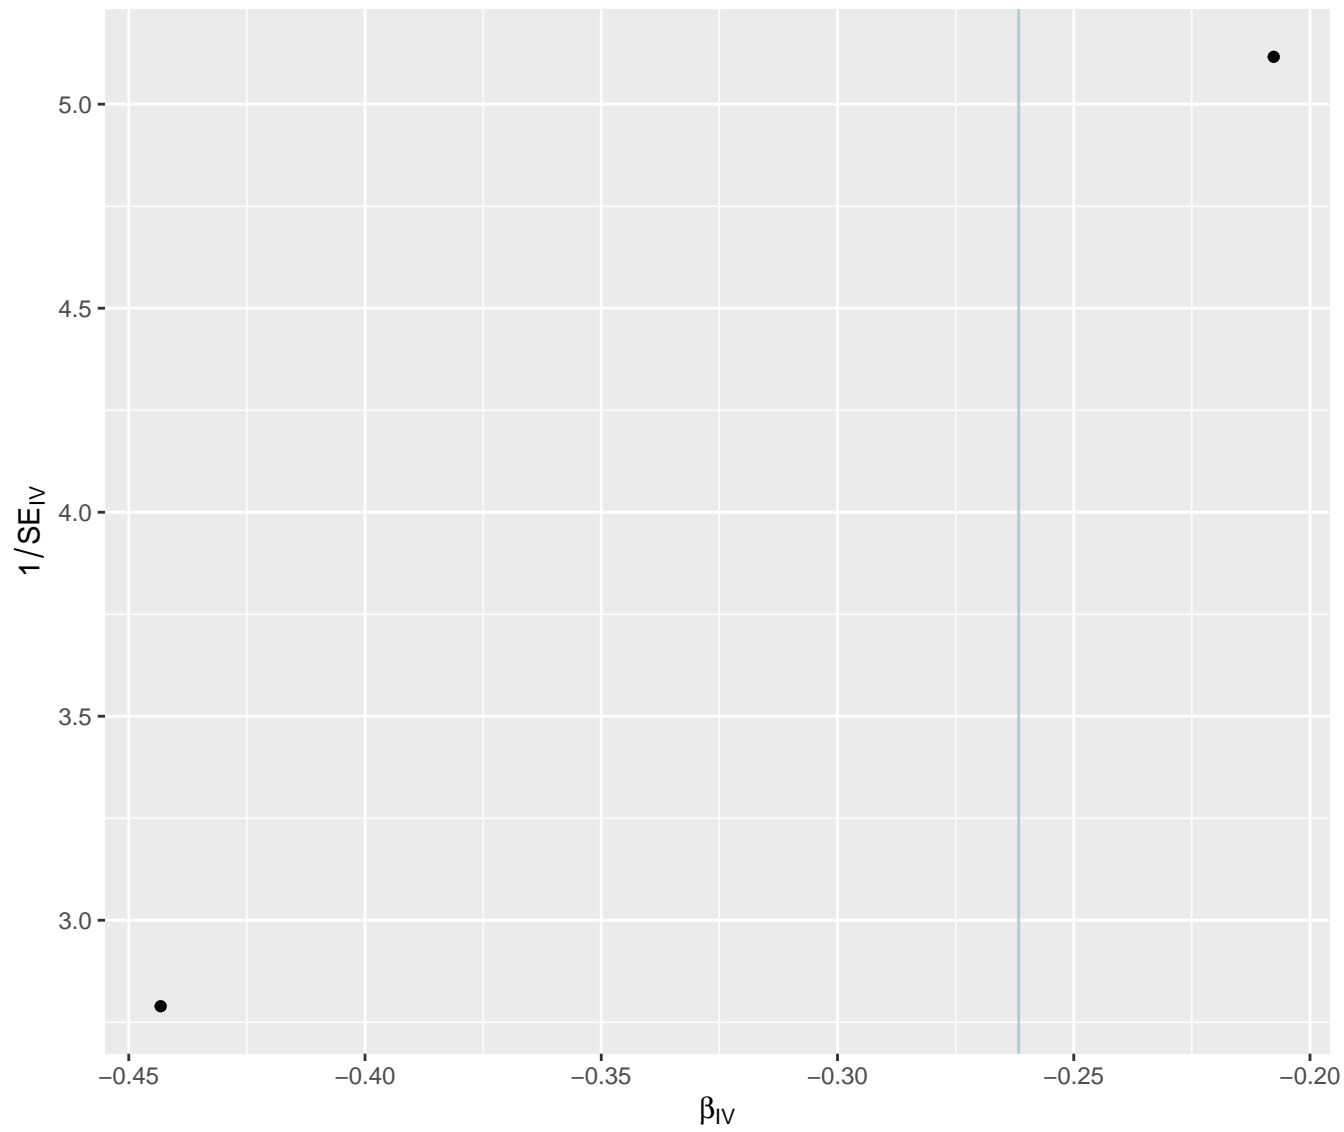

### MR Method

- Inverse variance weighted
- MR Egger

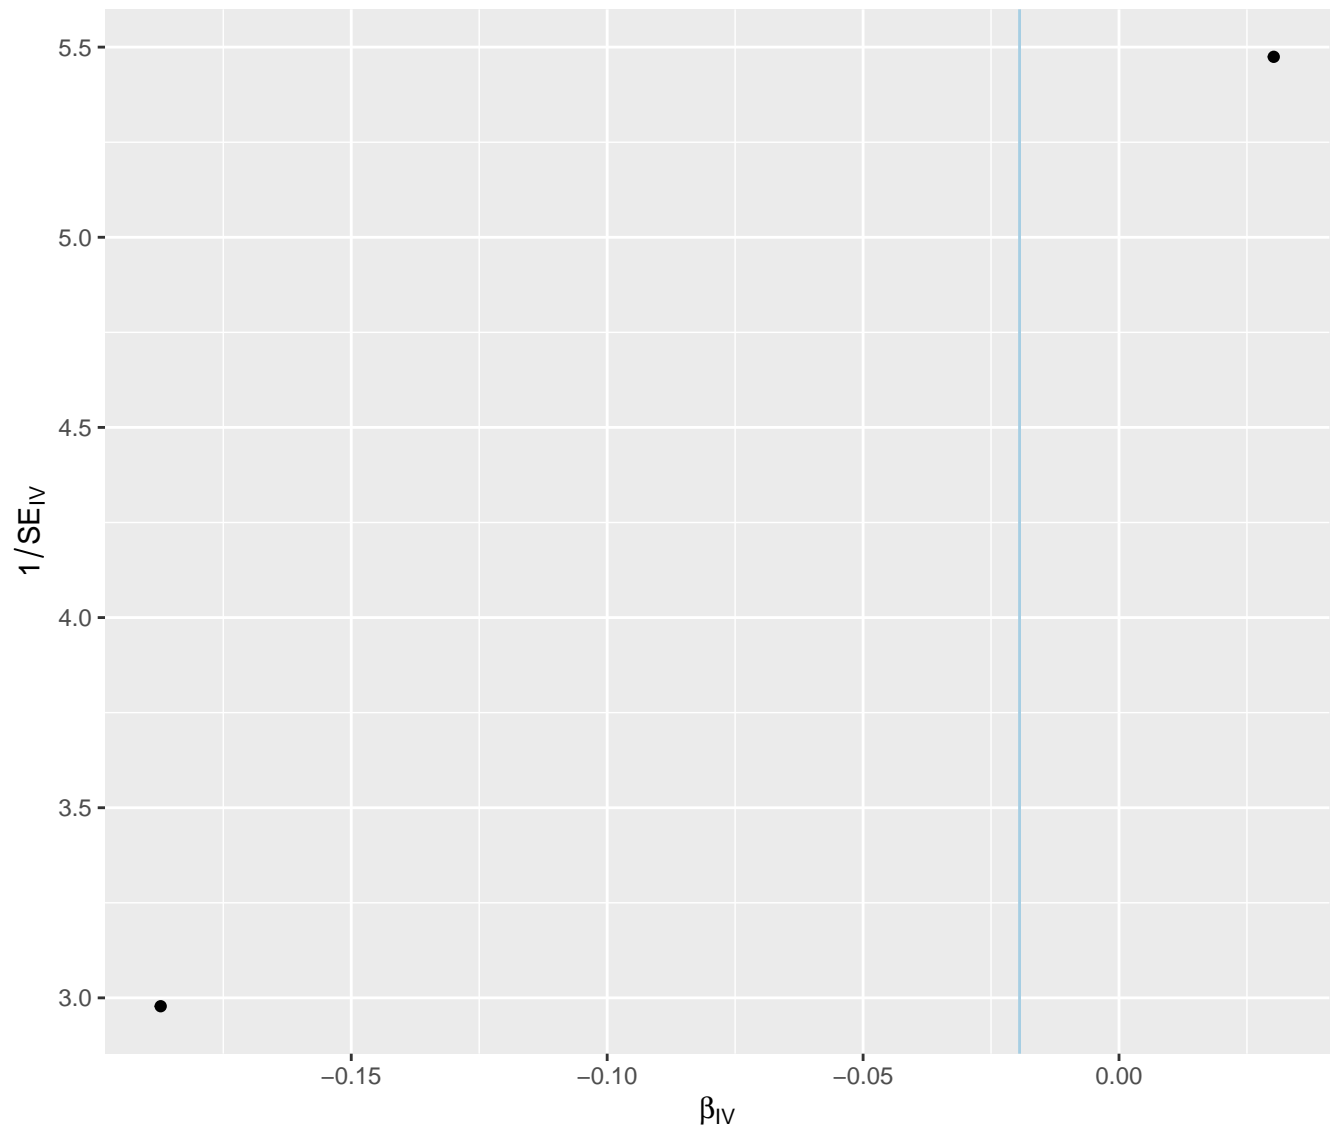

### MR Method

- Inverse variance weighted
- MR Egger

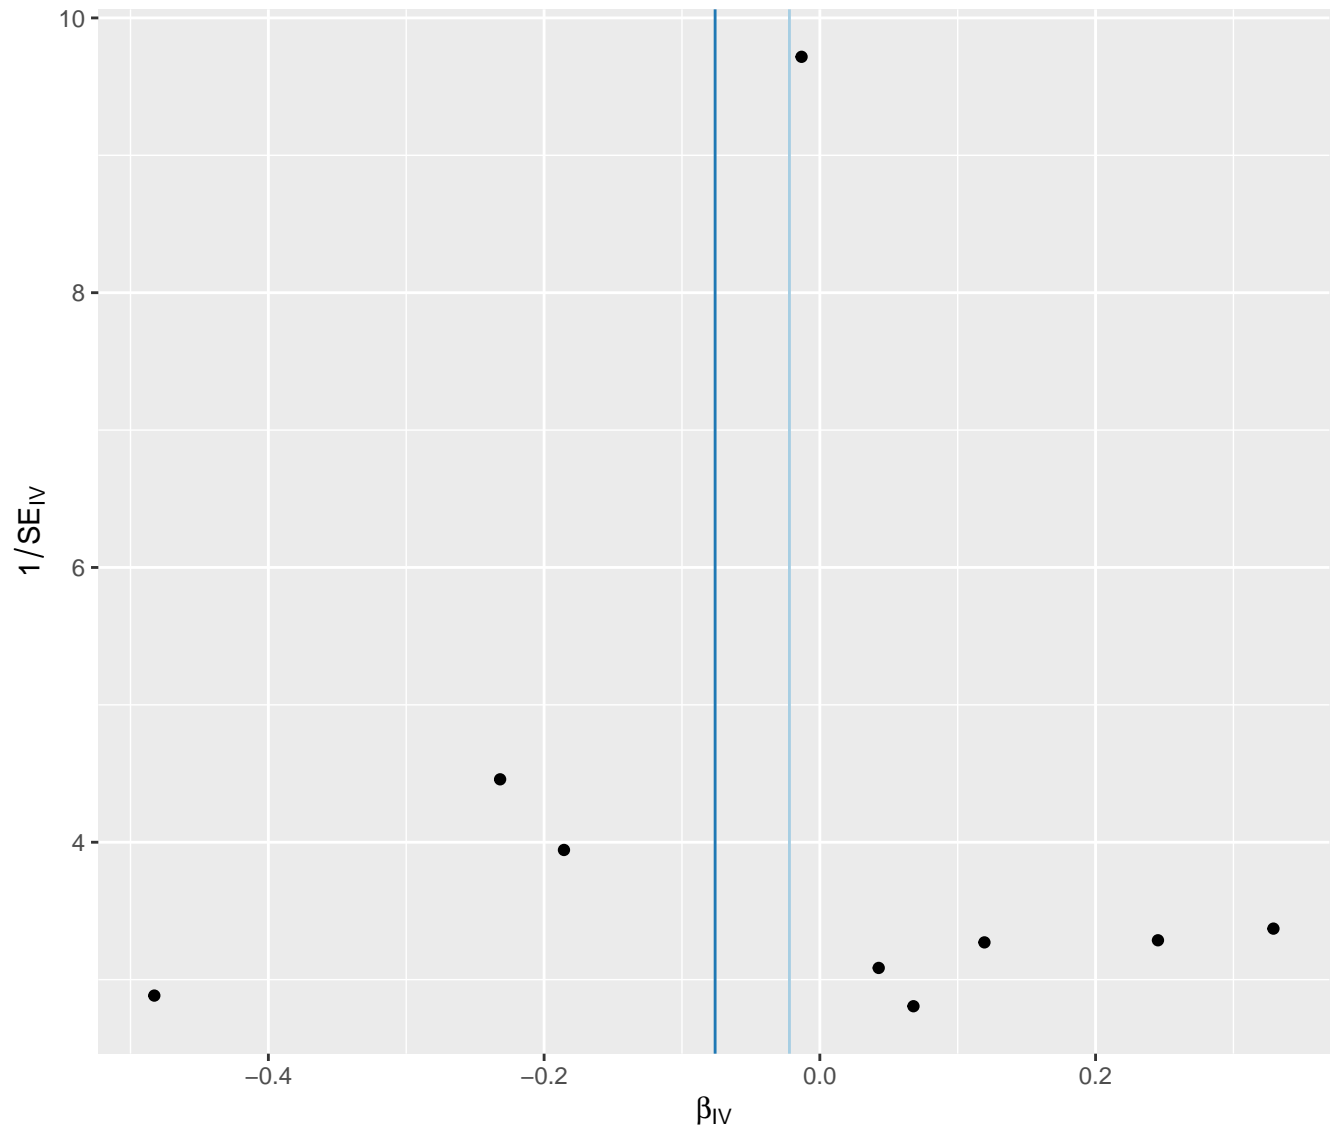

### MR Method

- Inverse variance weighted
- MR Egger

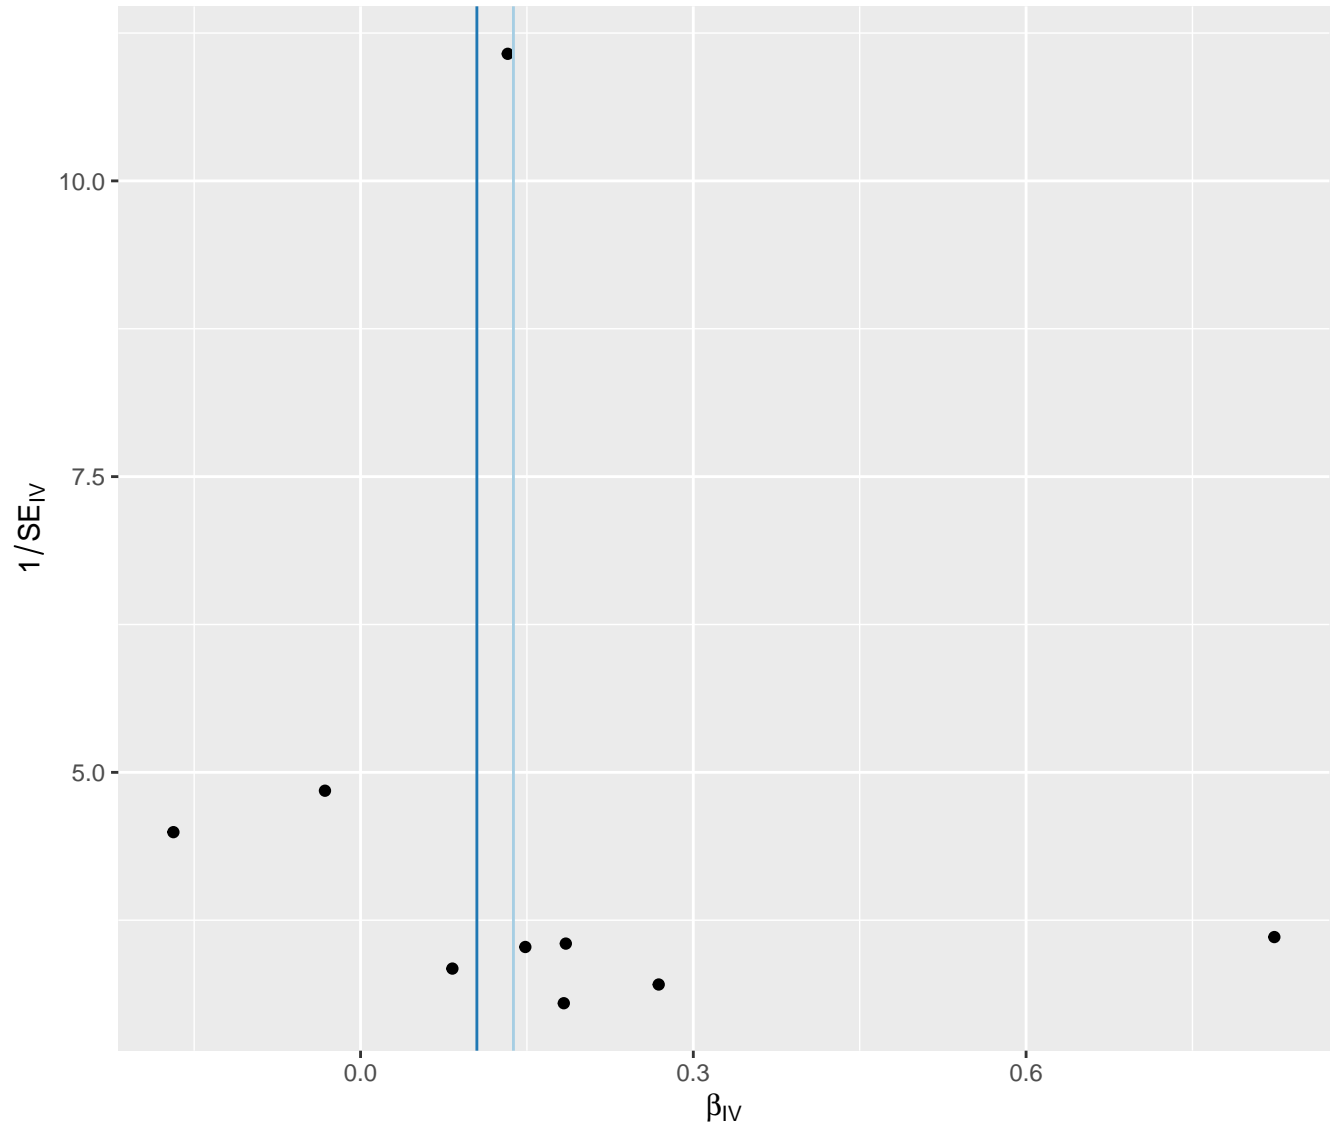

### MR Method

- Inverse variance weighted
- MR Egger

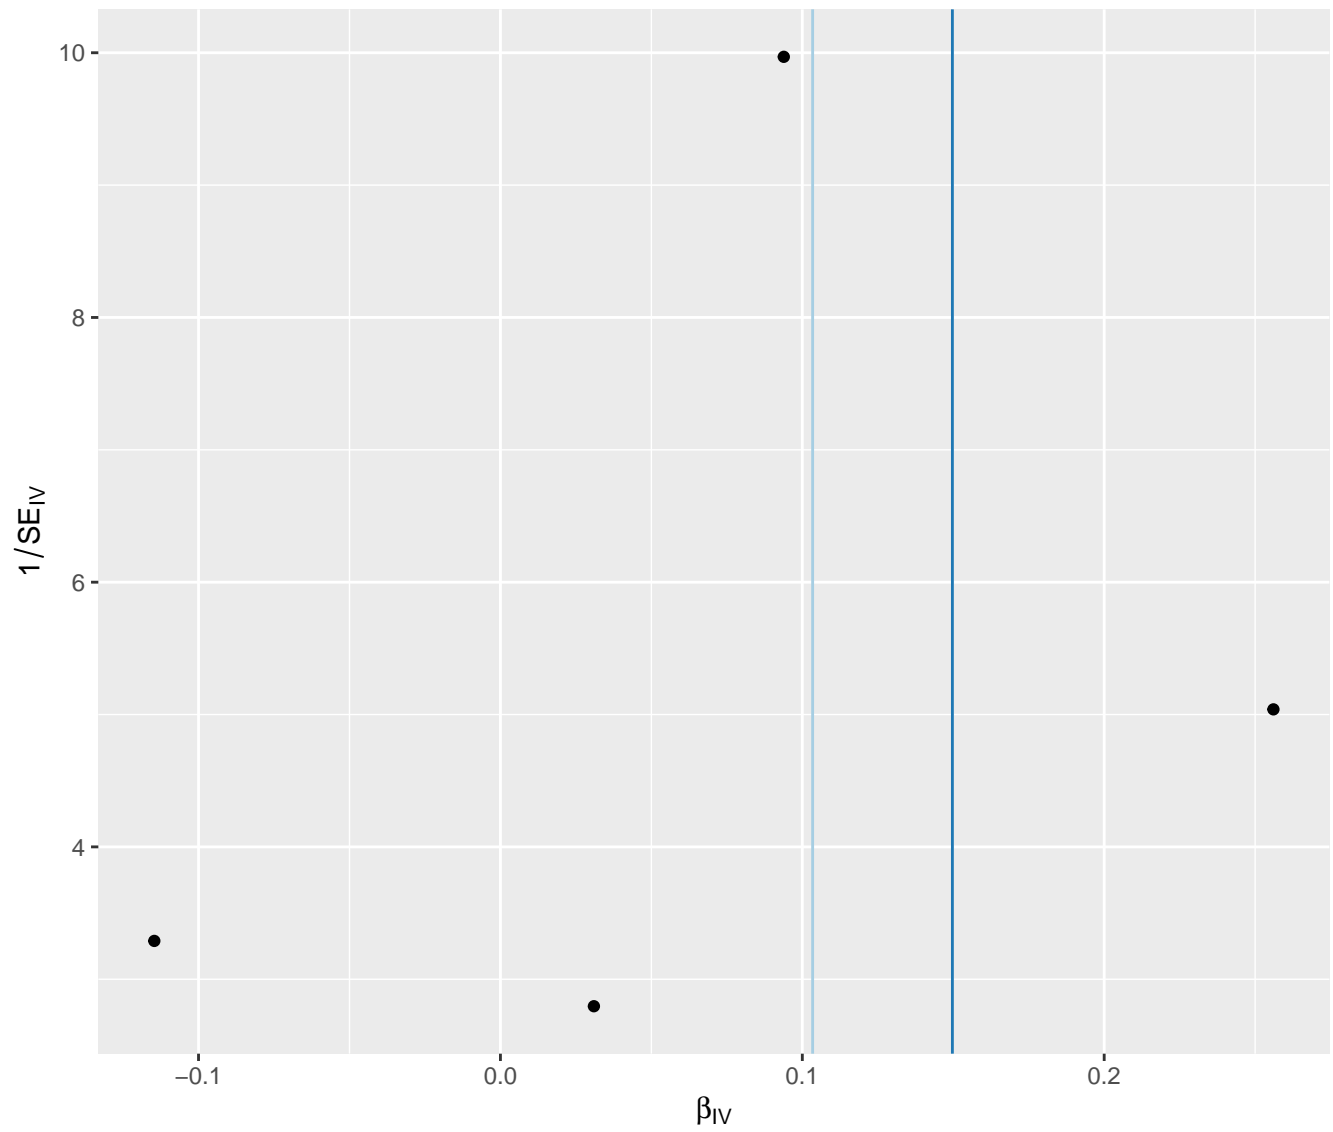

### MR Method

- Inverse variance weighted
- MR Egger

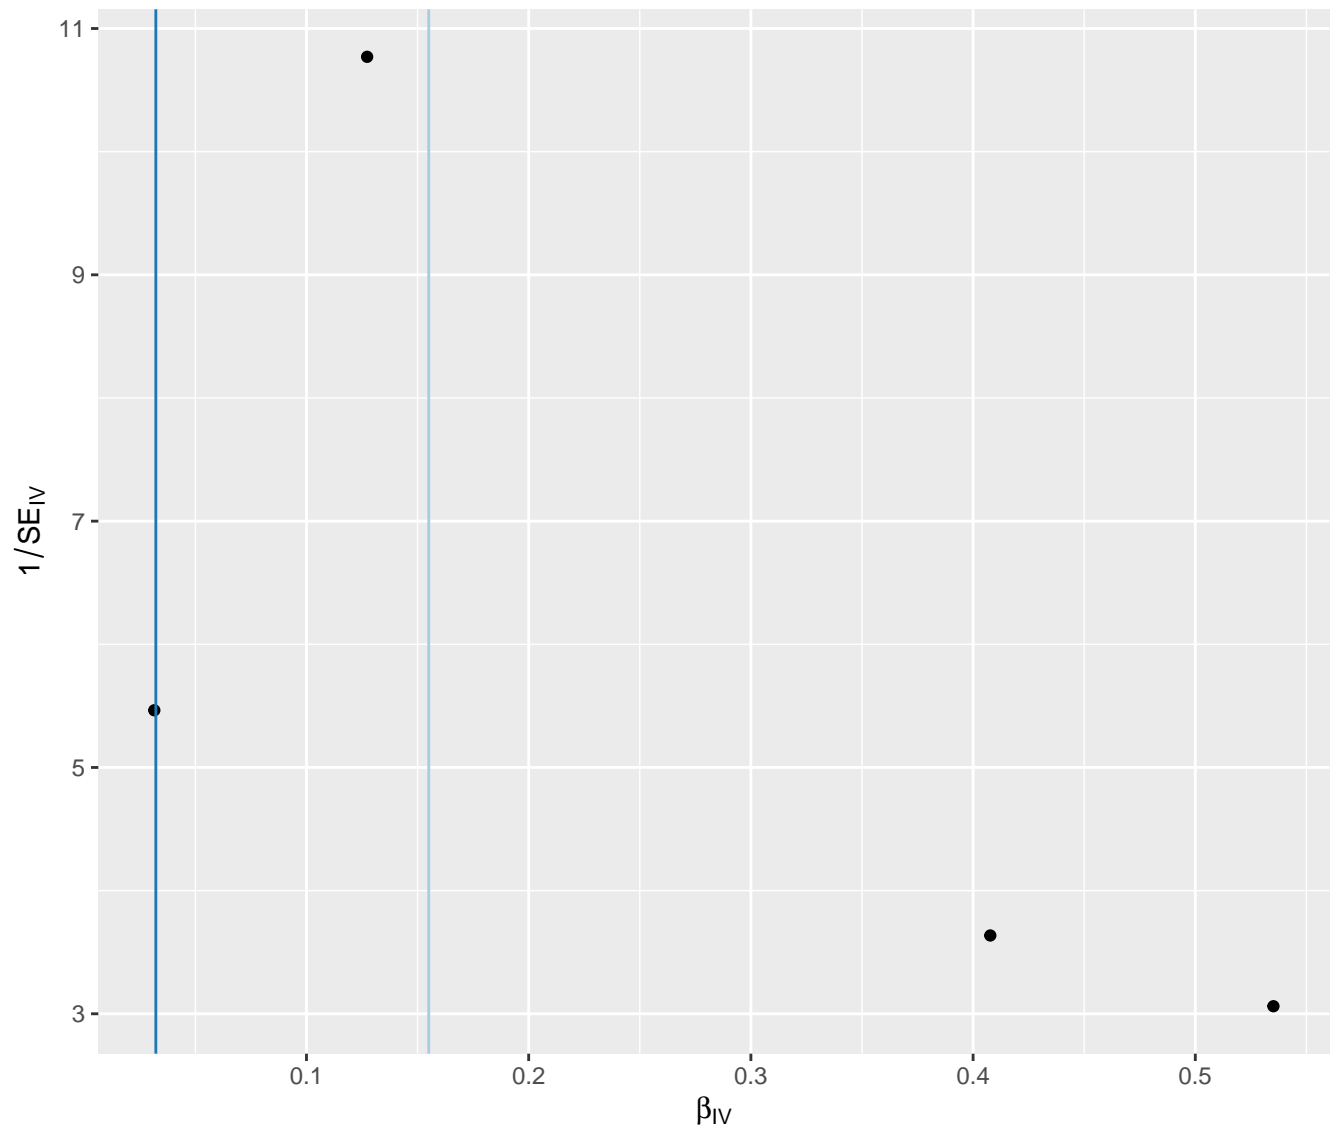



### MR Method

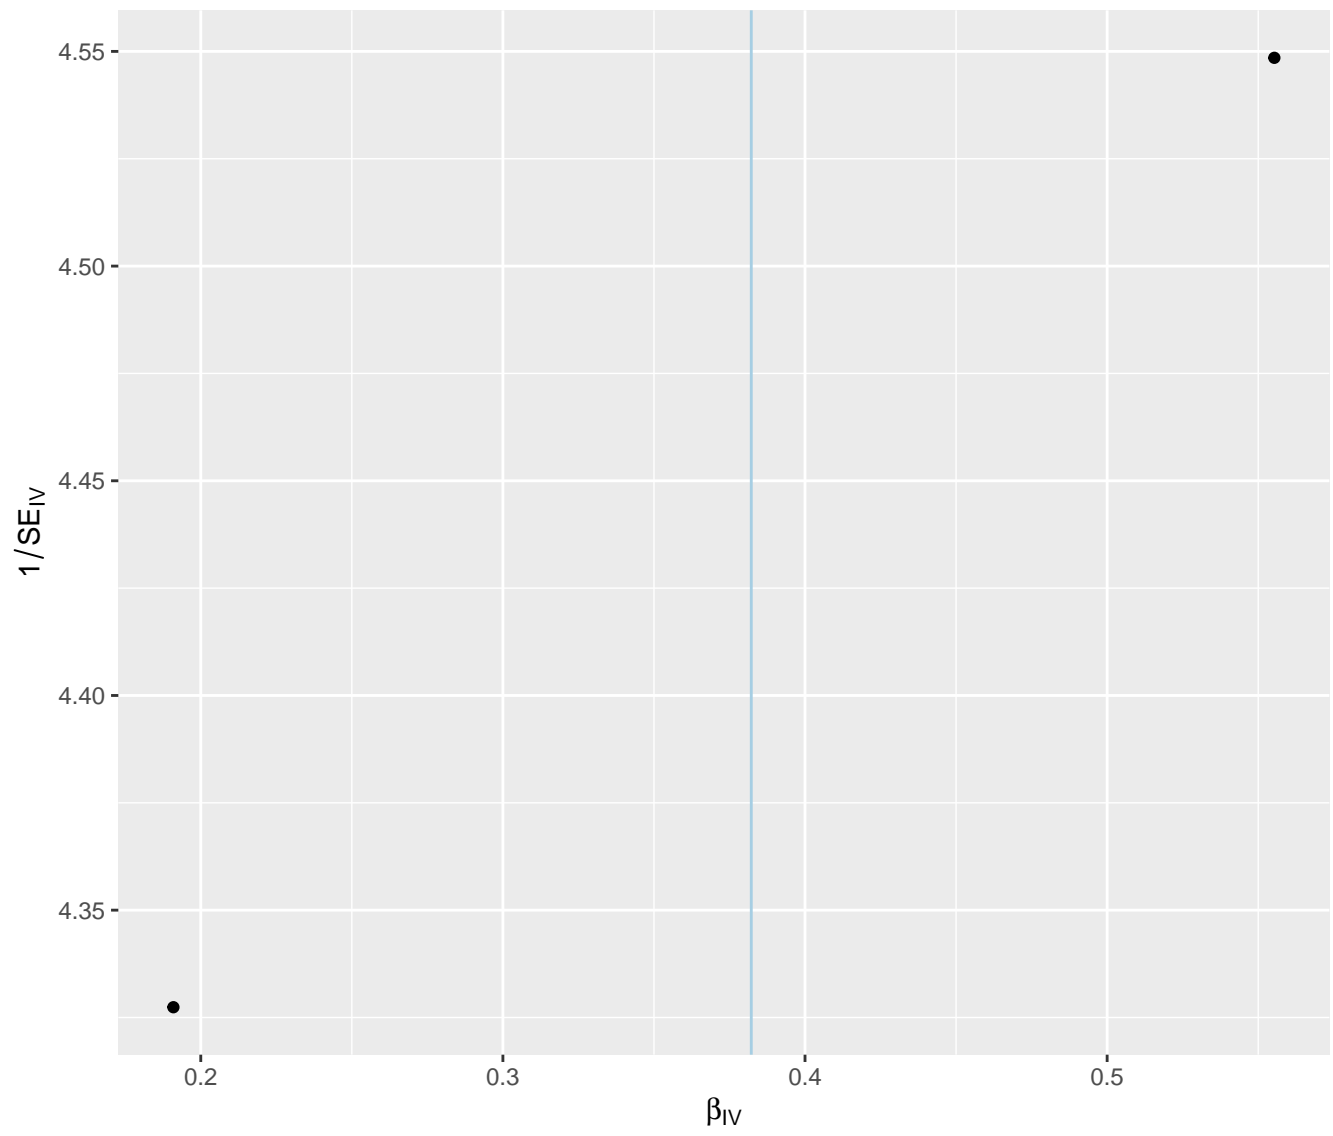

### MR Method

- Inverse variance weighted
- MR Egger

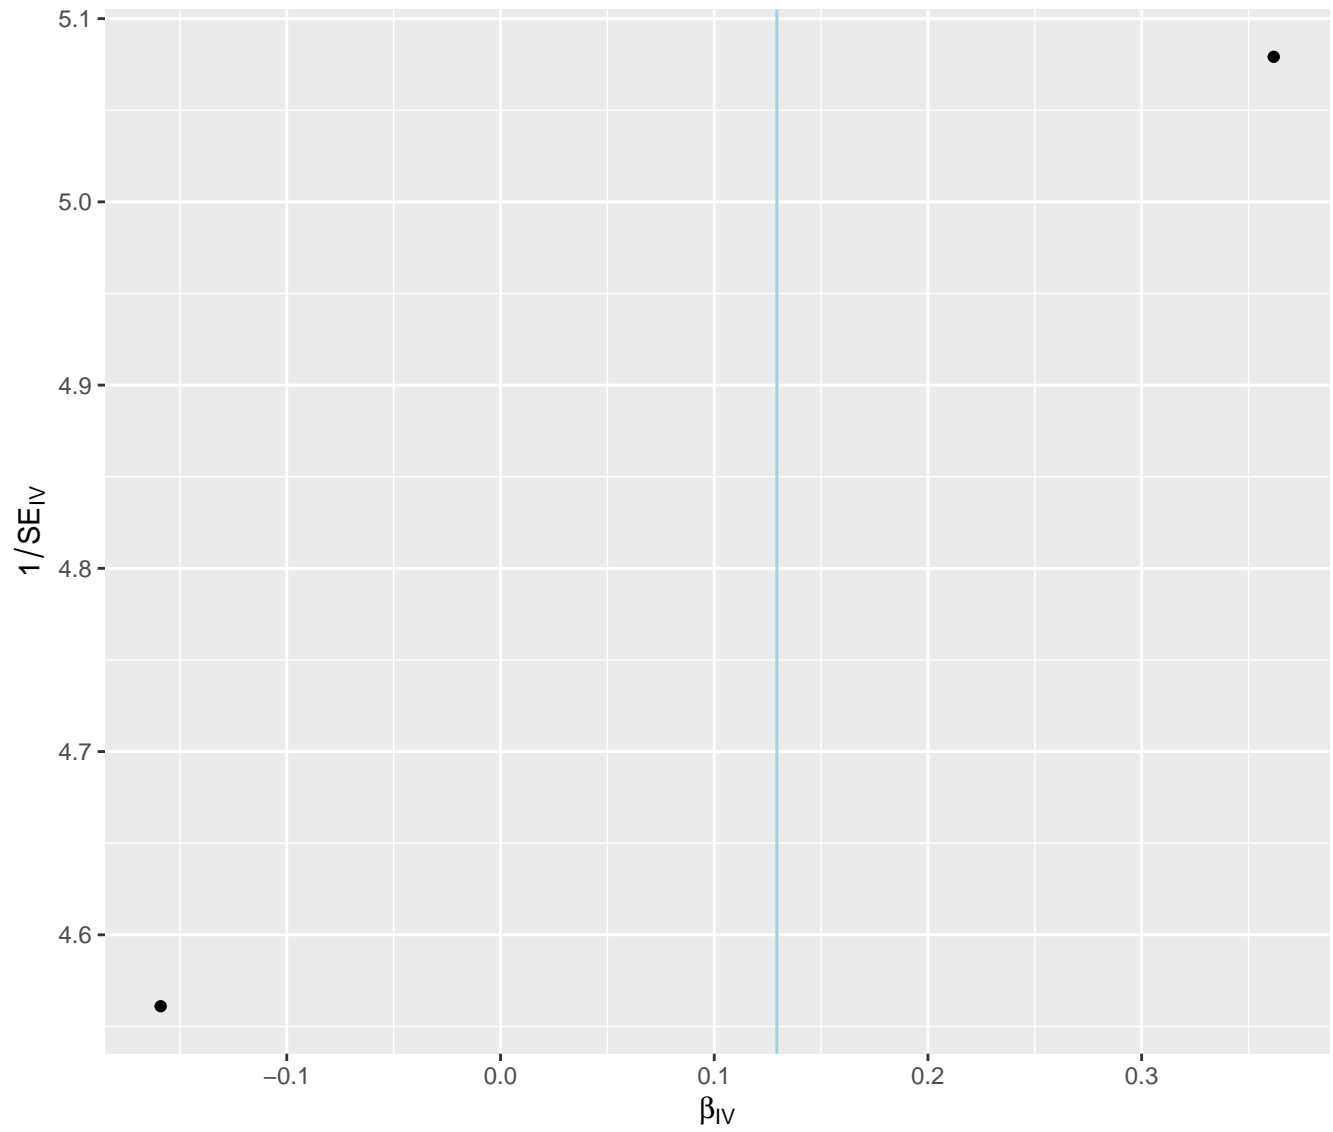

### MR Method

- Inverse variance weighted
- MR Egger

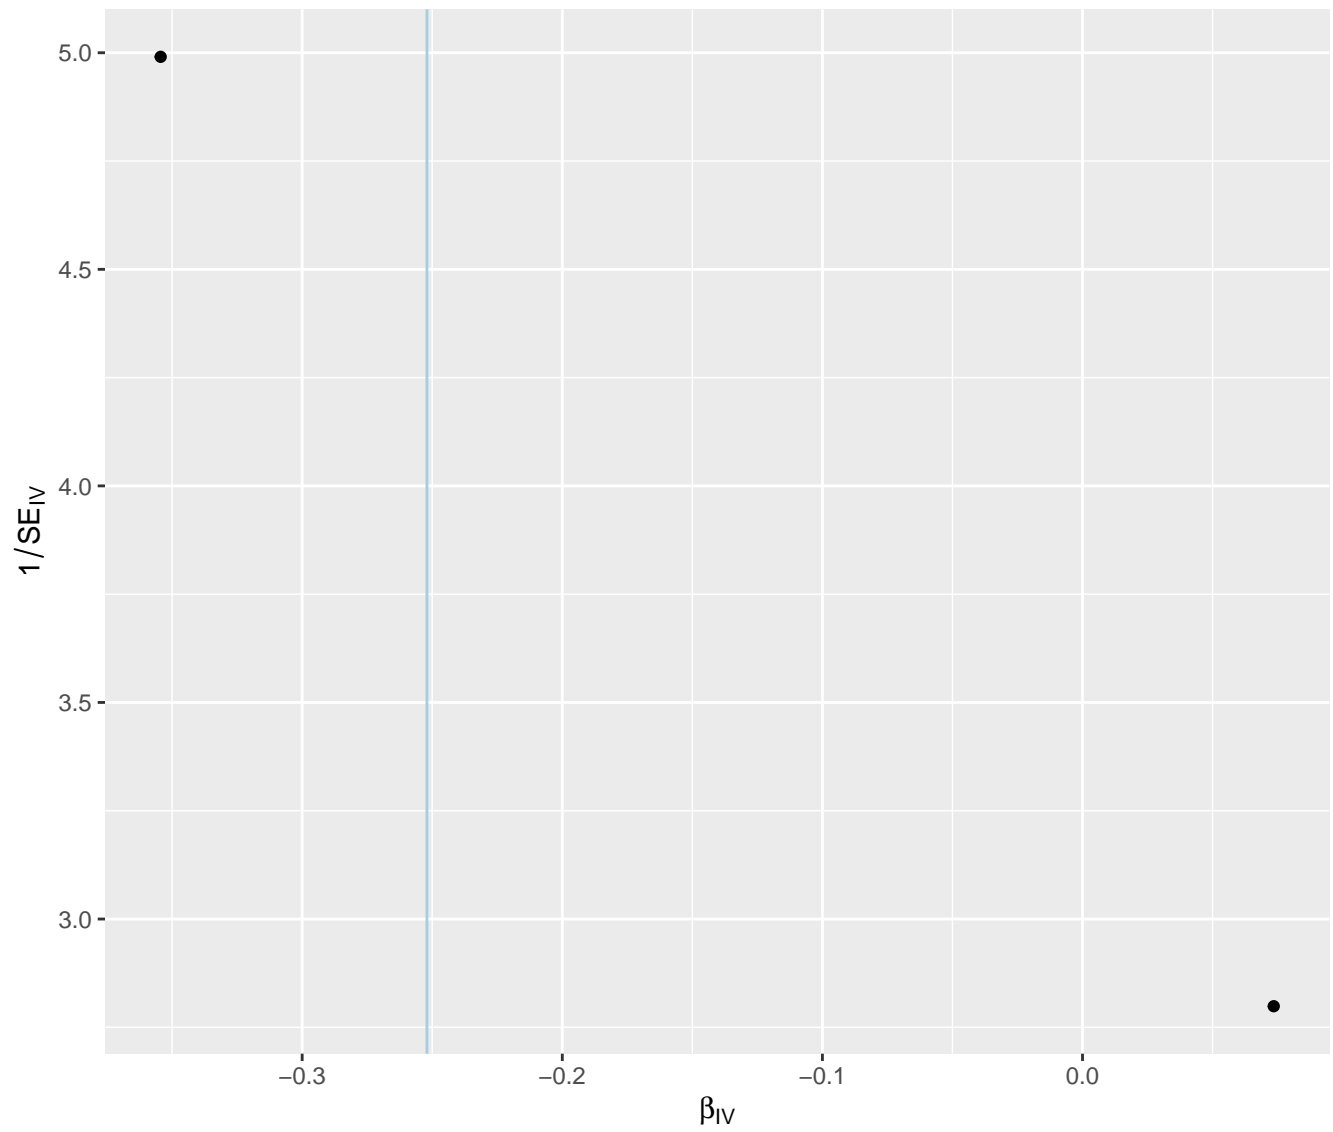

### MR Method

- Inverse variance weighted
- MR Egger

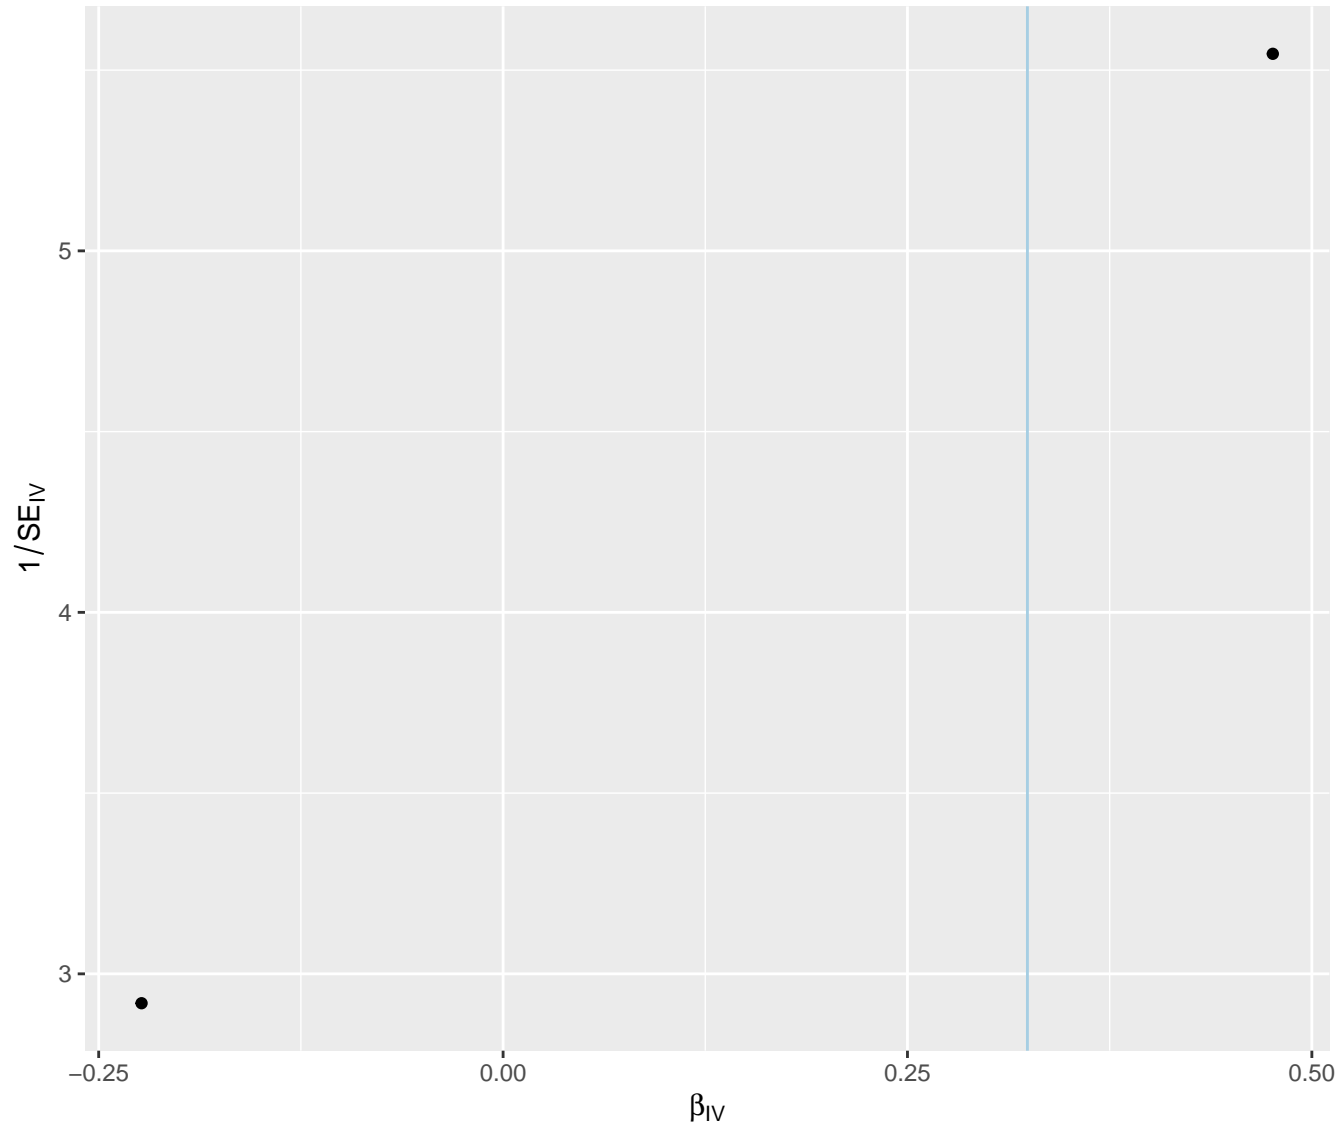

### MR Method

- Inverse variance weighted
- MR Egger

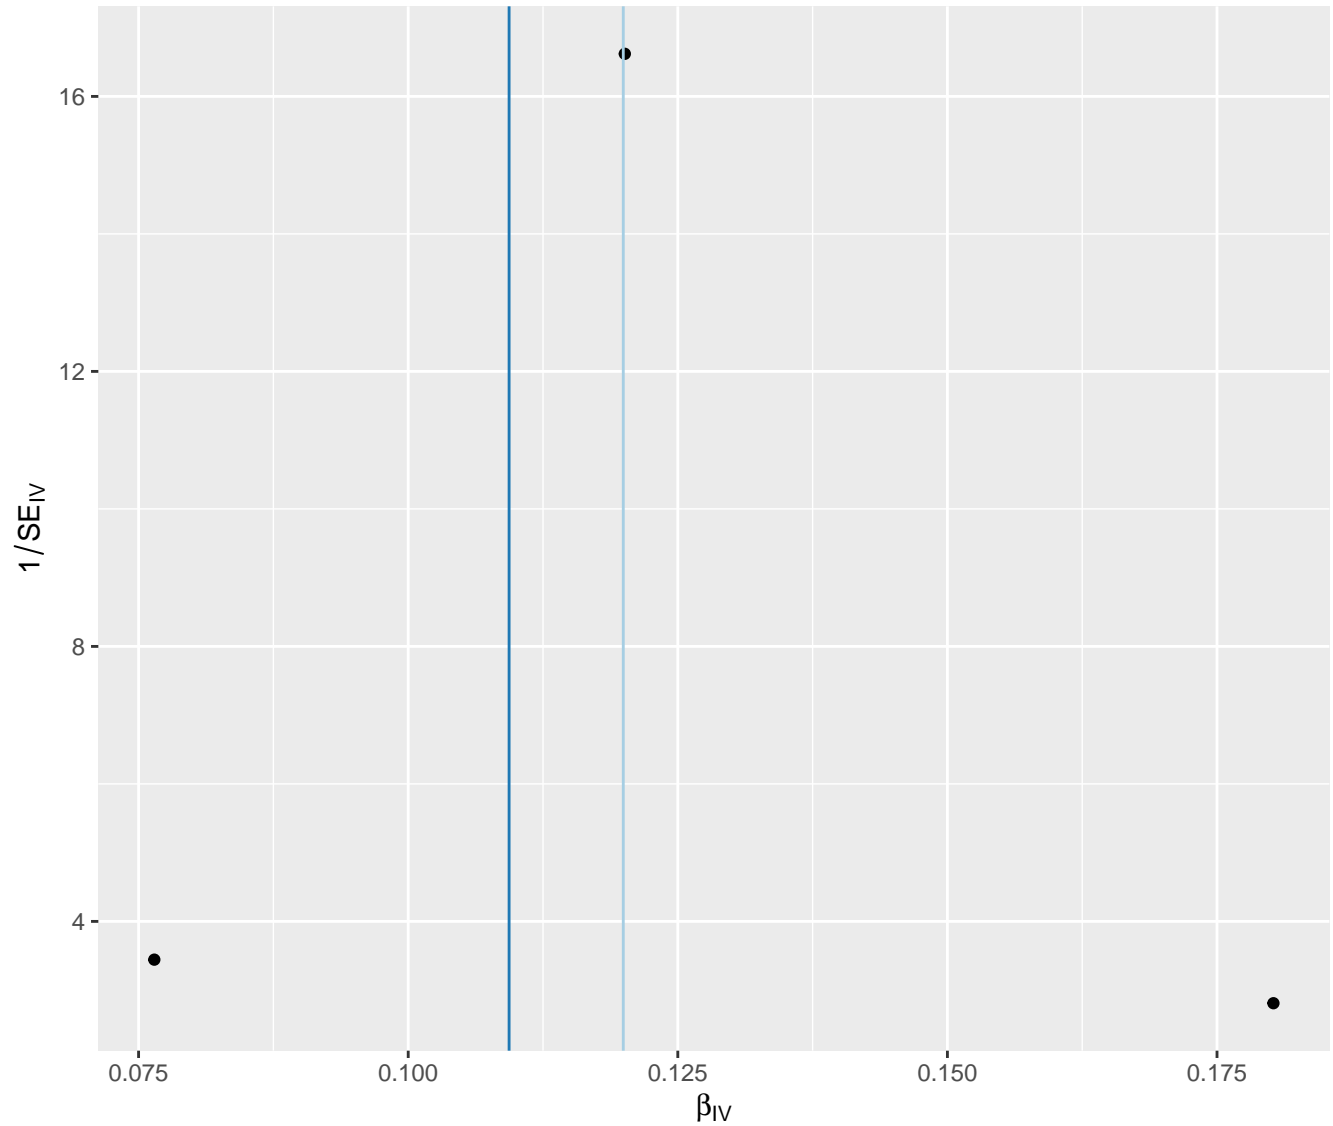

### MR Method

- Inverse variance weighted
- MR Egger

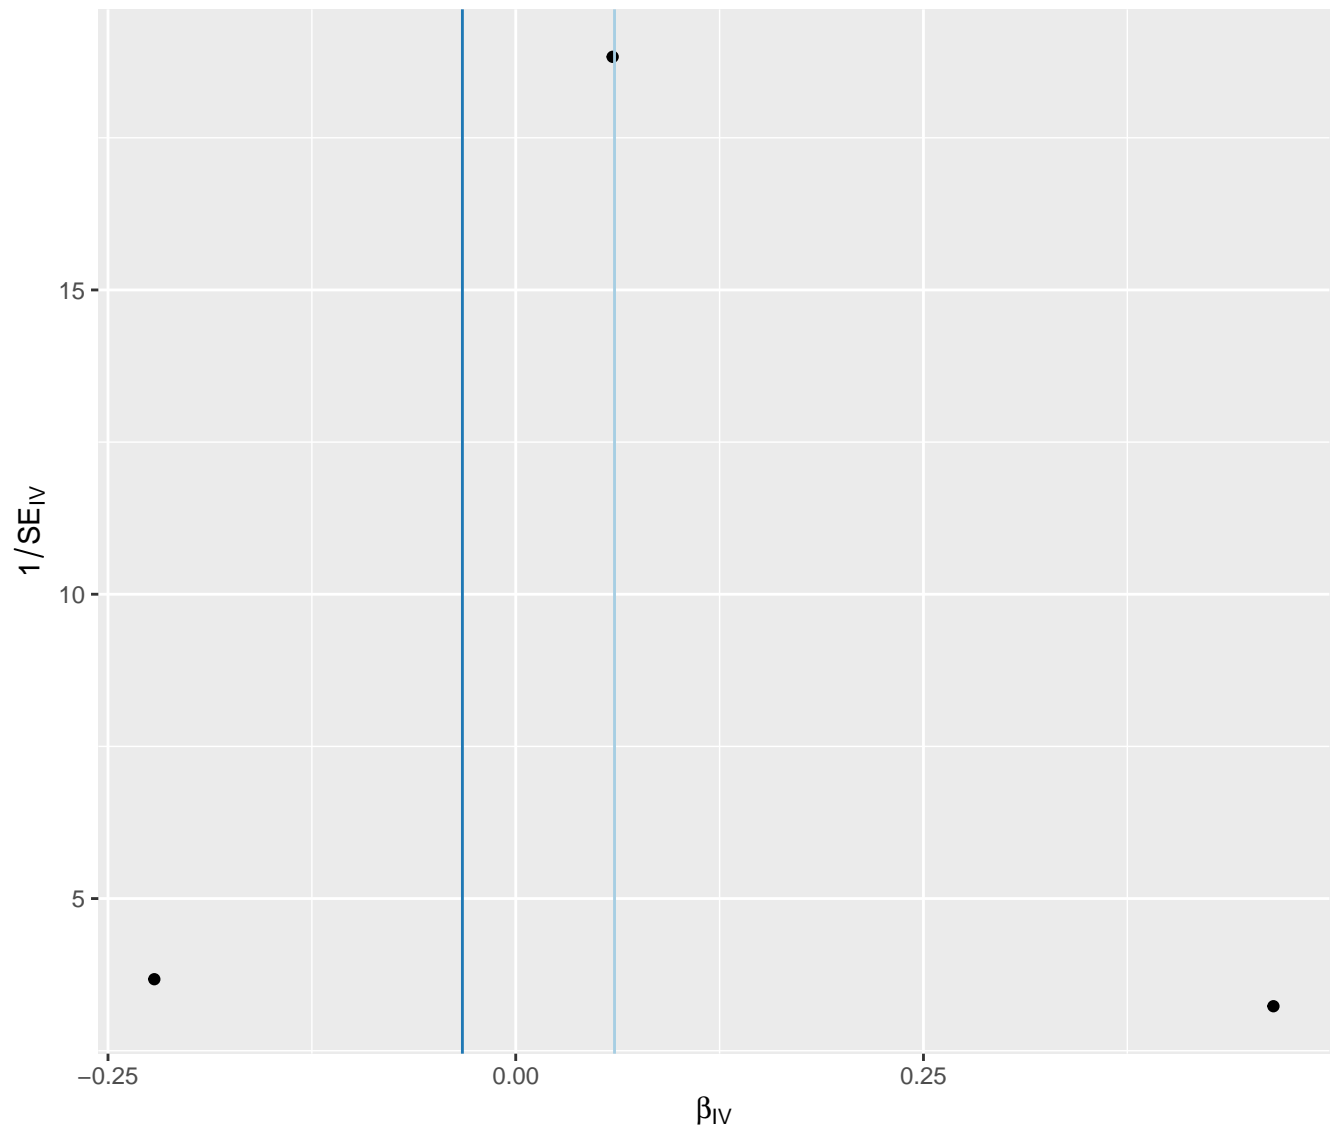

### MR Method

- Inverse variance weighted
- MR Egger

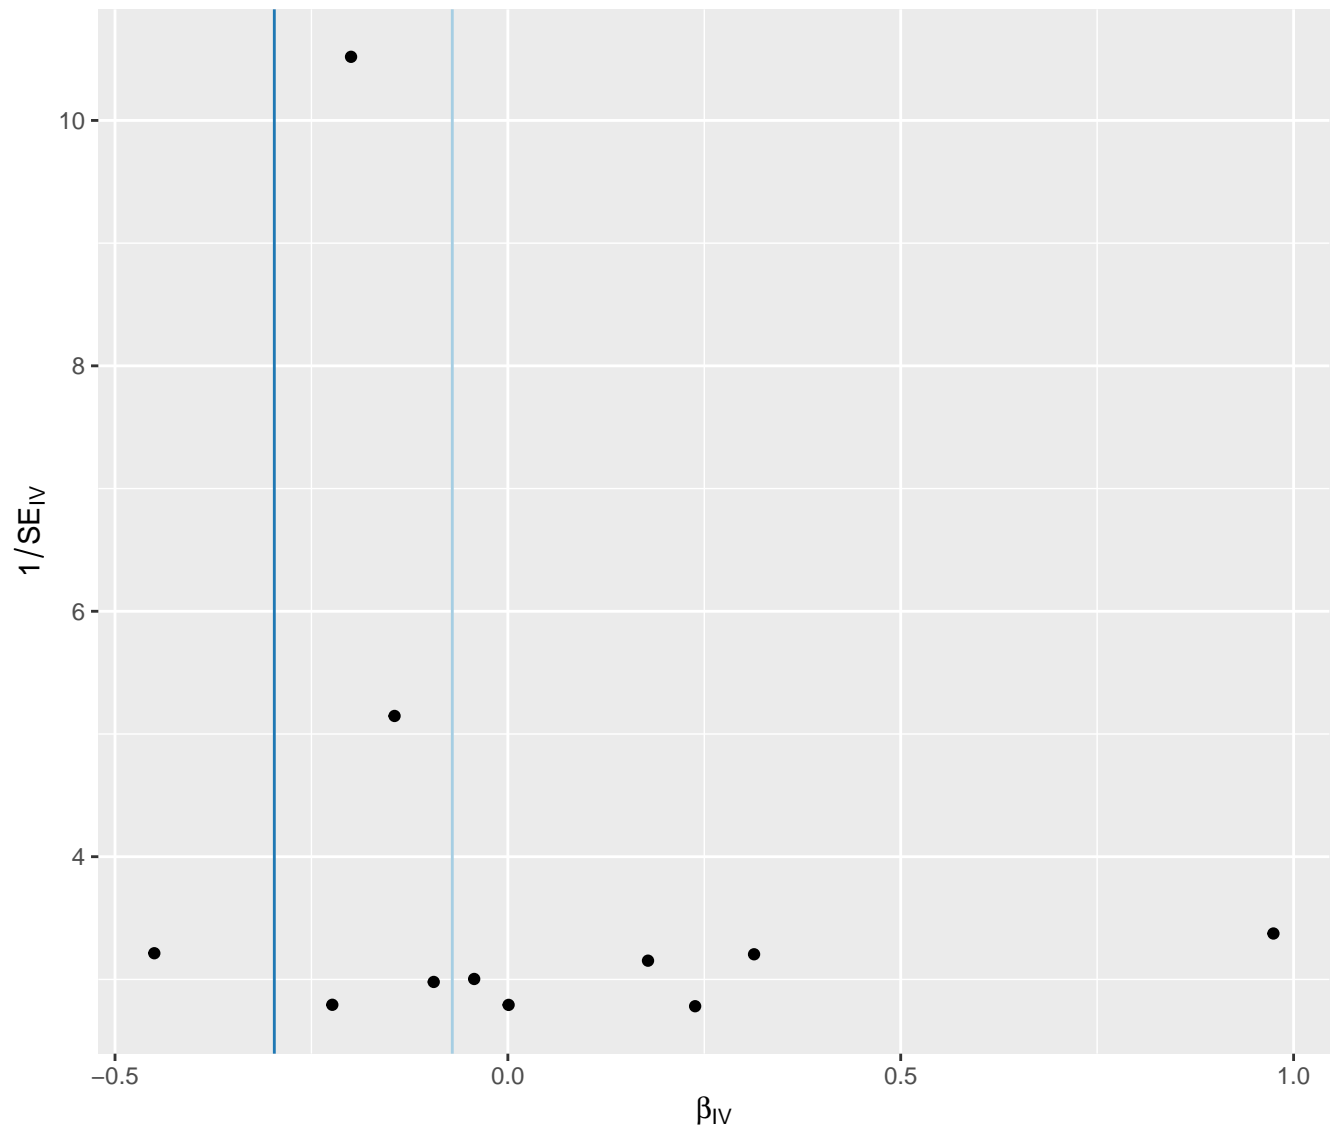

### MR Method

- Inverse variance weighted
- MR Egger

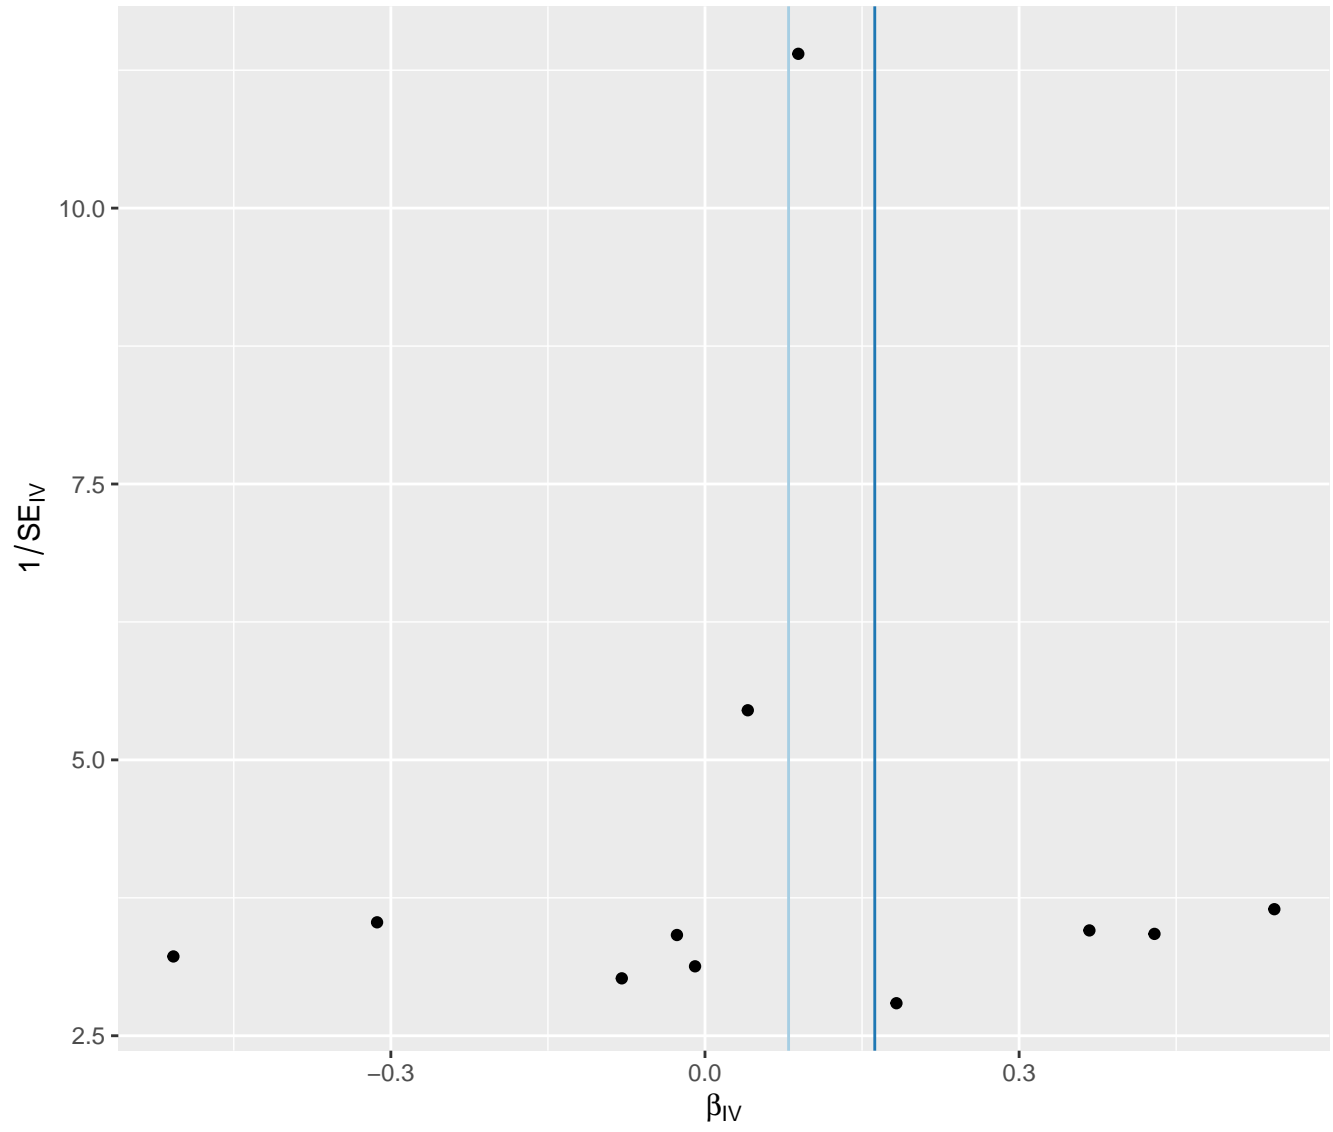



### MR Method

- Inverse variance weighted
- MR Egger

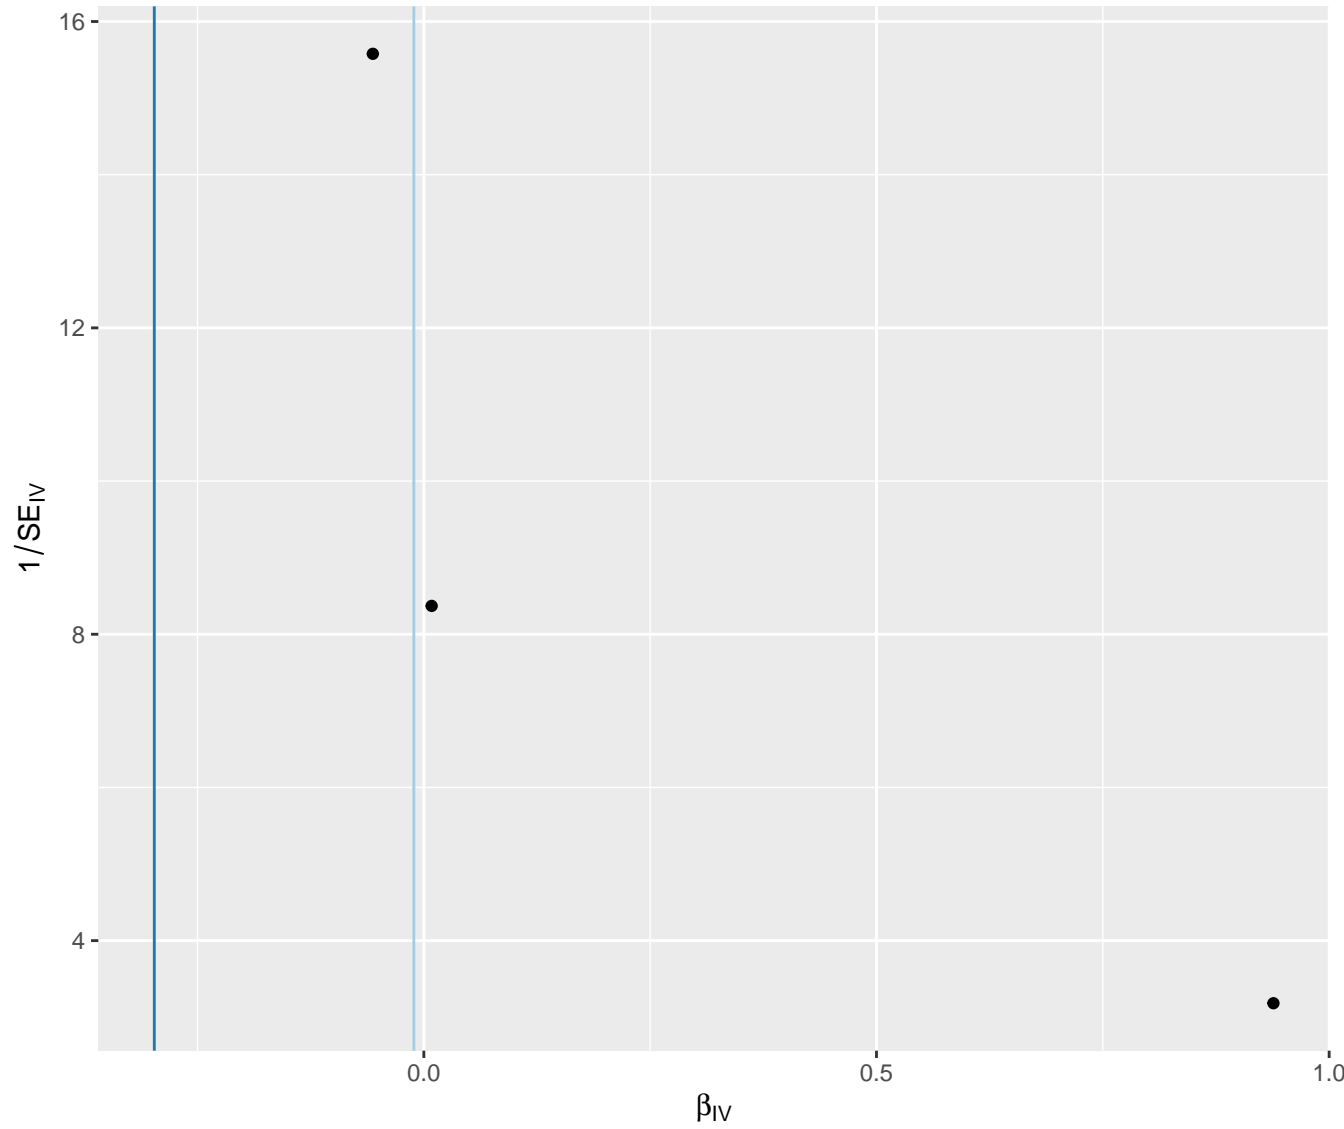

### MR Method

- Inverse variance weighted
- MR Egger

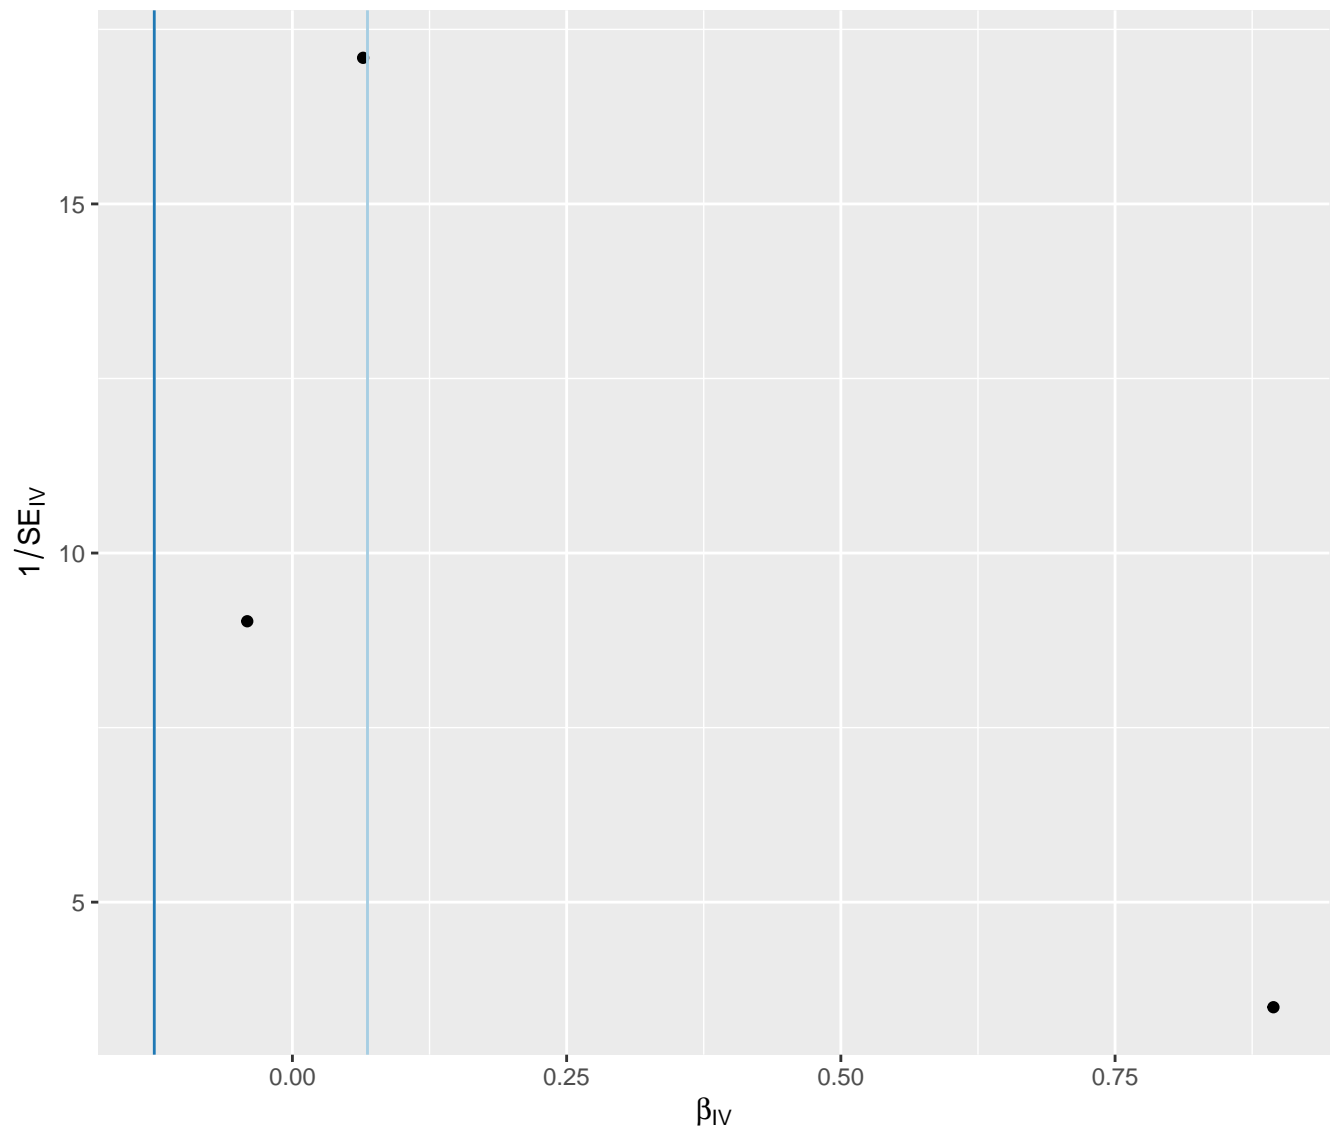

### MR Method

- Inverse variance weighted
- MR Egger

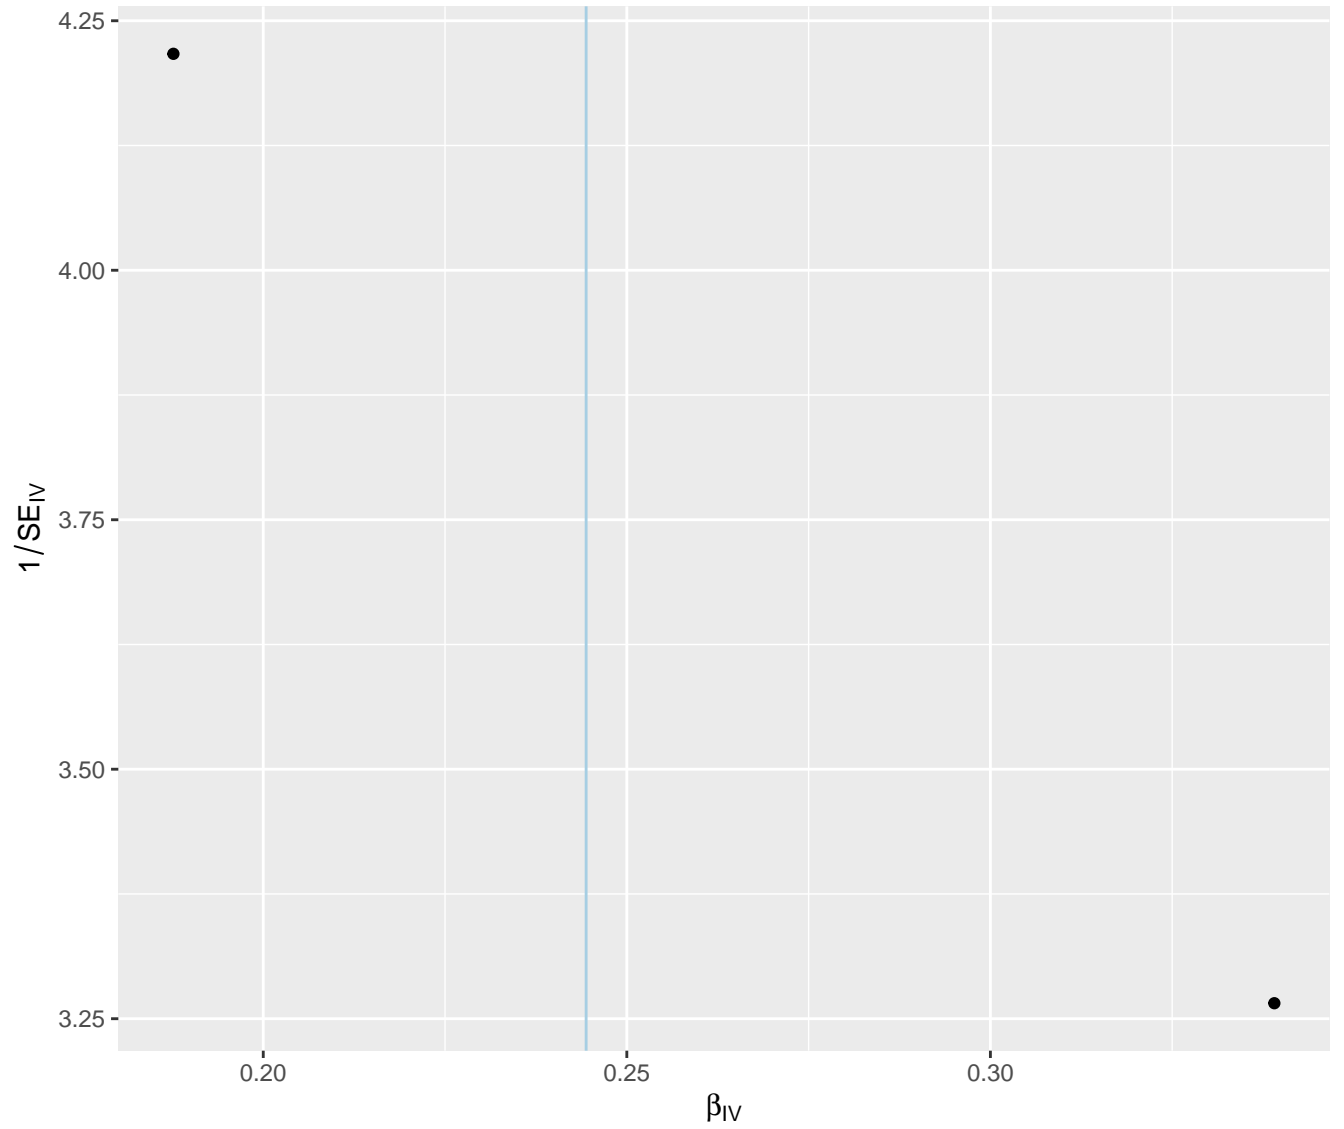

### MR Method

- Inverse variance weighted
- MR Egger

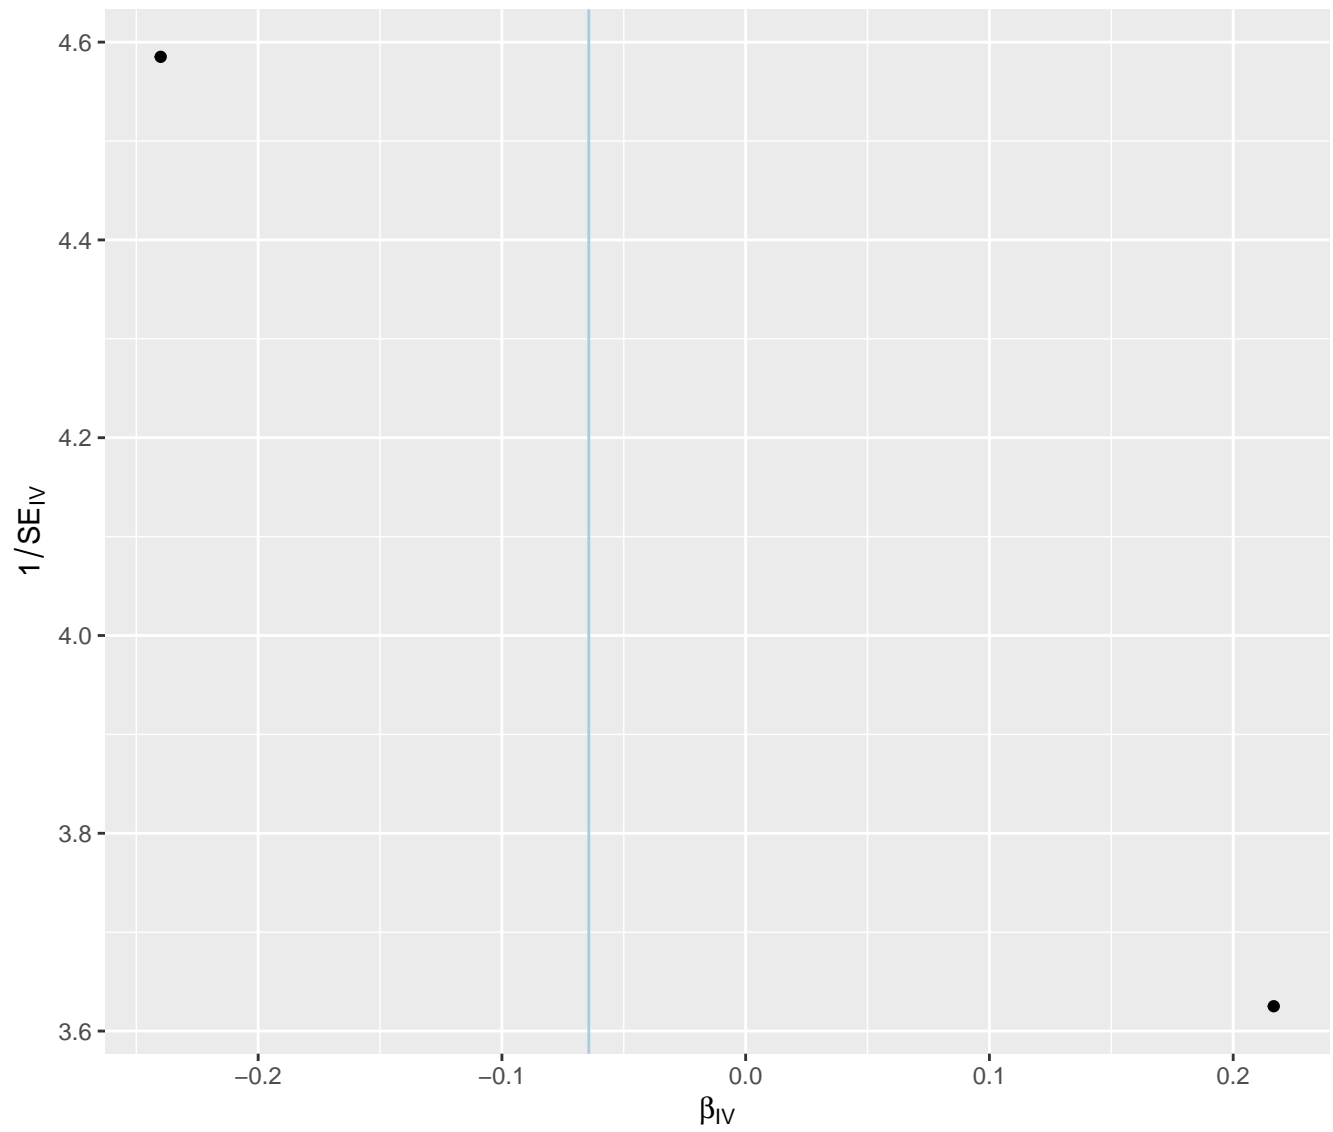

### MR Method

- Inverse variance weighted
- MR Egger

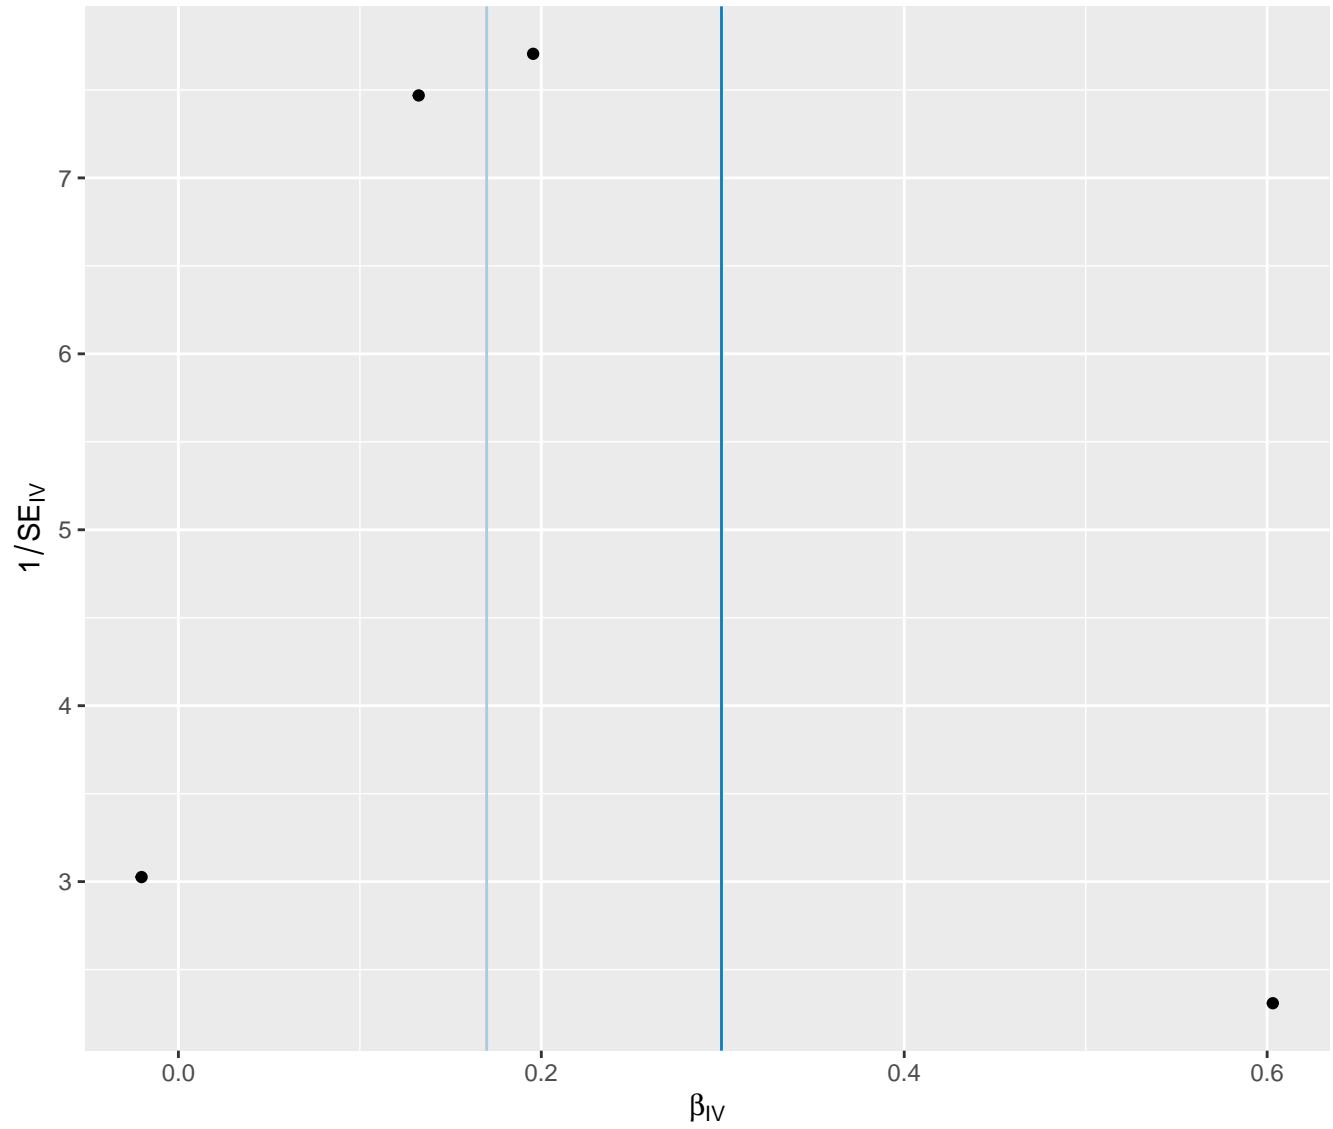

### MR Method

- Inverse variance weighted
- MR Egger

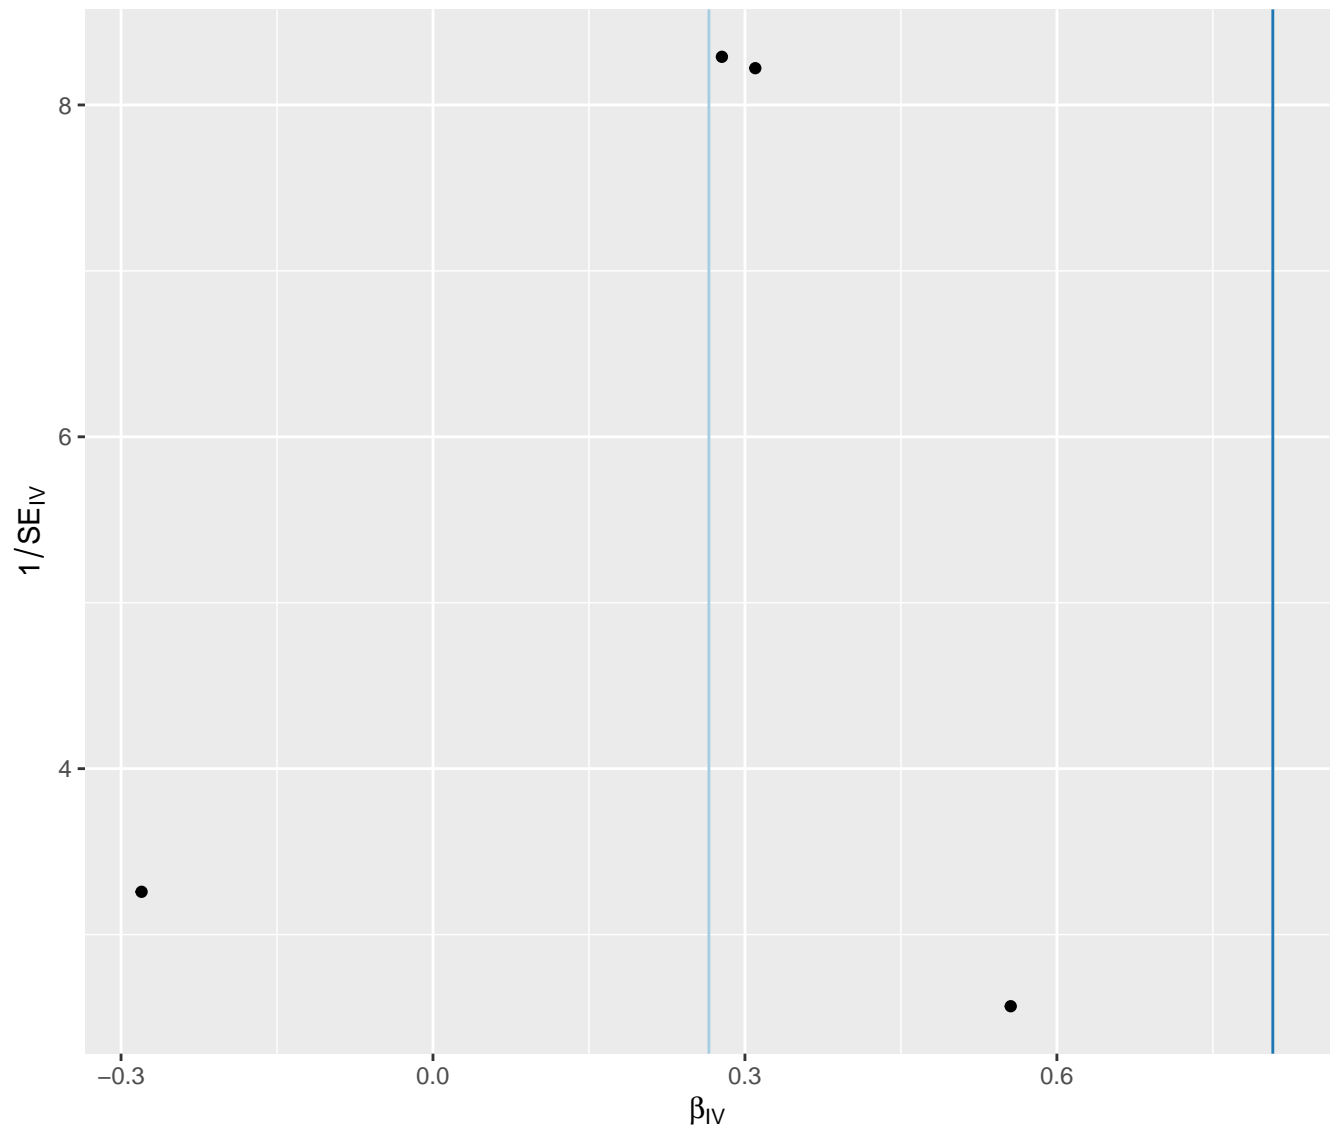

### MR Method

- Inverse variance weighted
- MR Egger

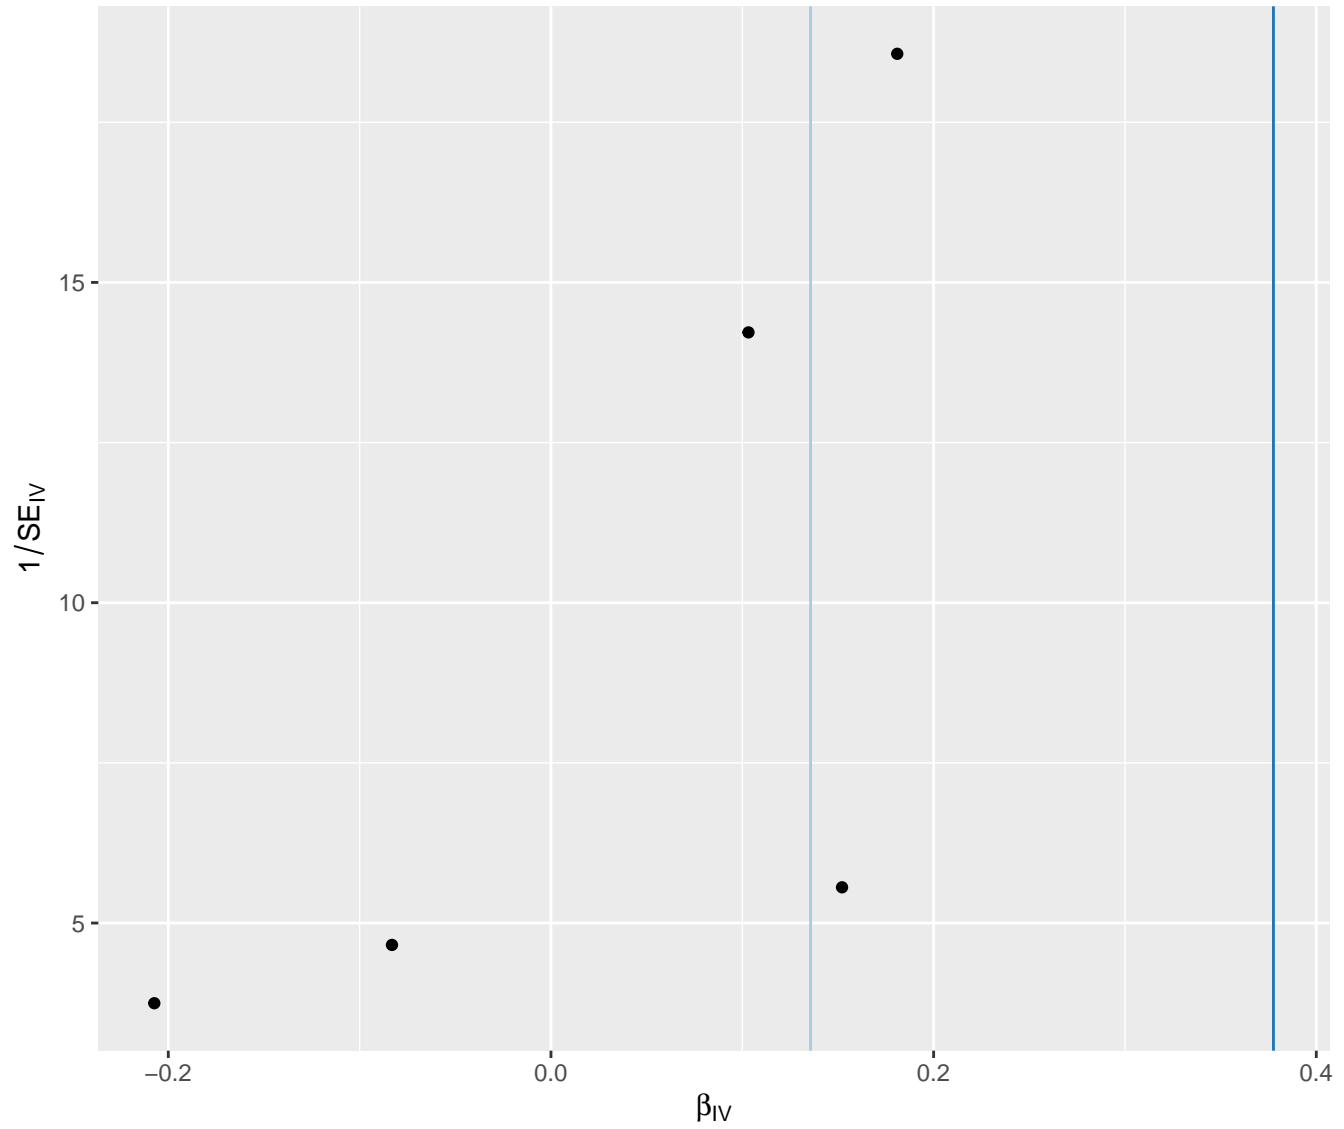

### MR Method

- Inverse variance weighted
- MR Egger

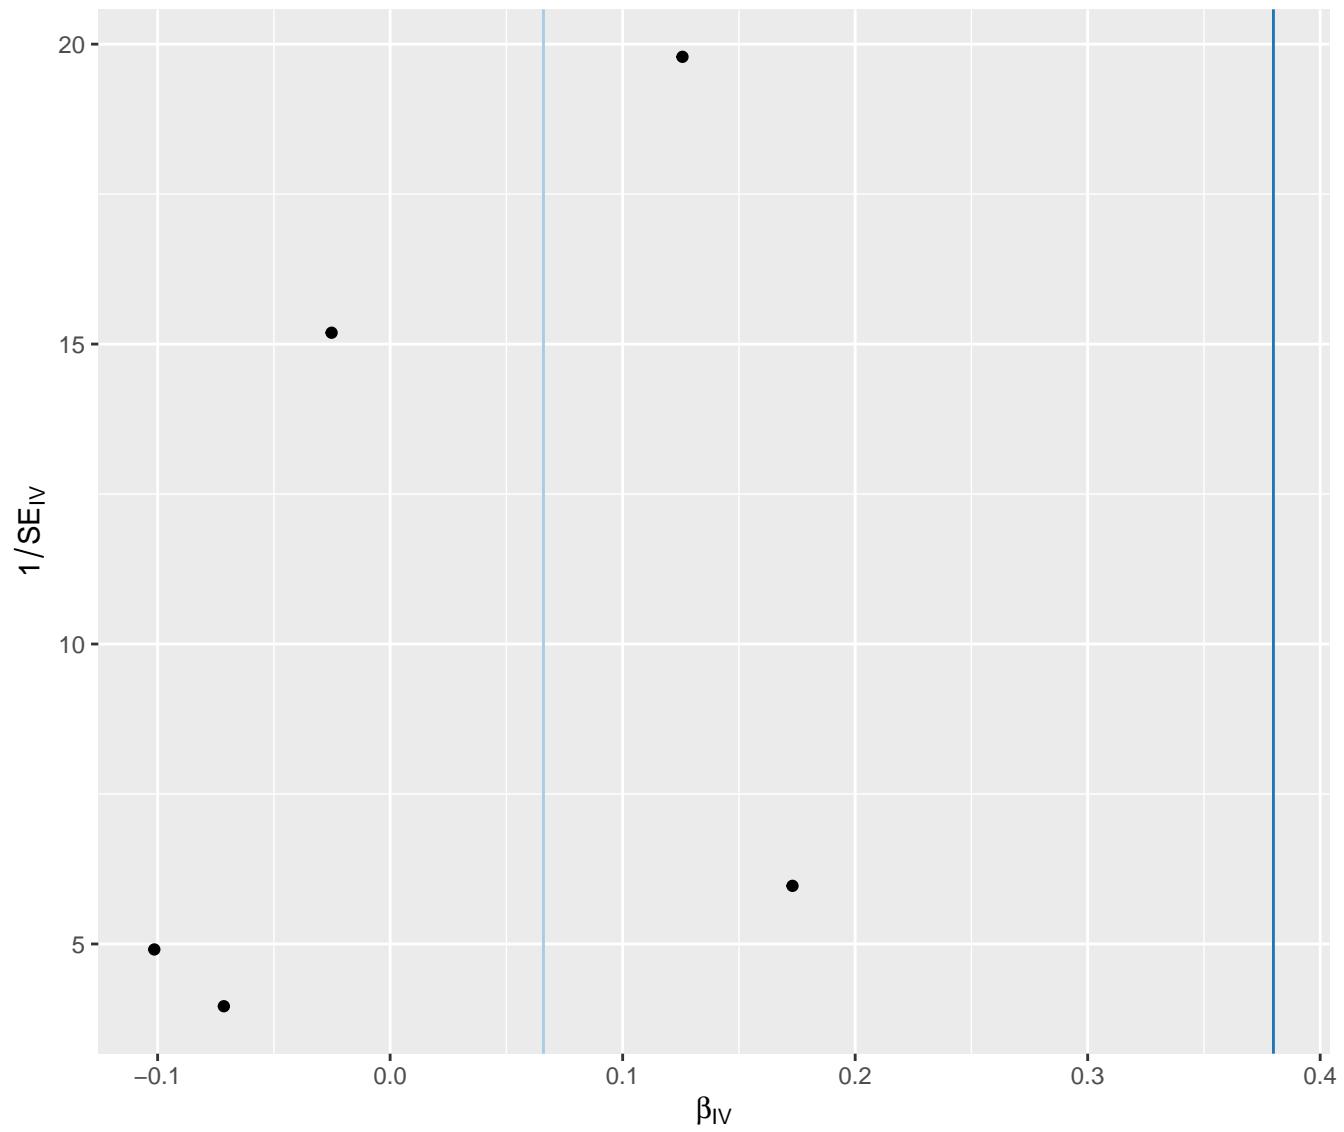



### MR Method

- Inverse variance weighted
- MR Egger

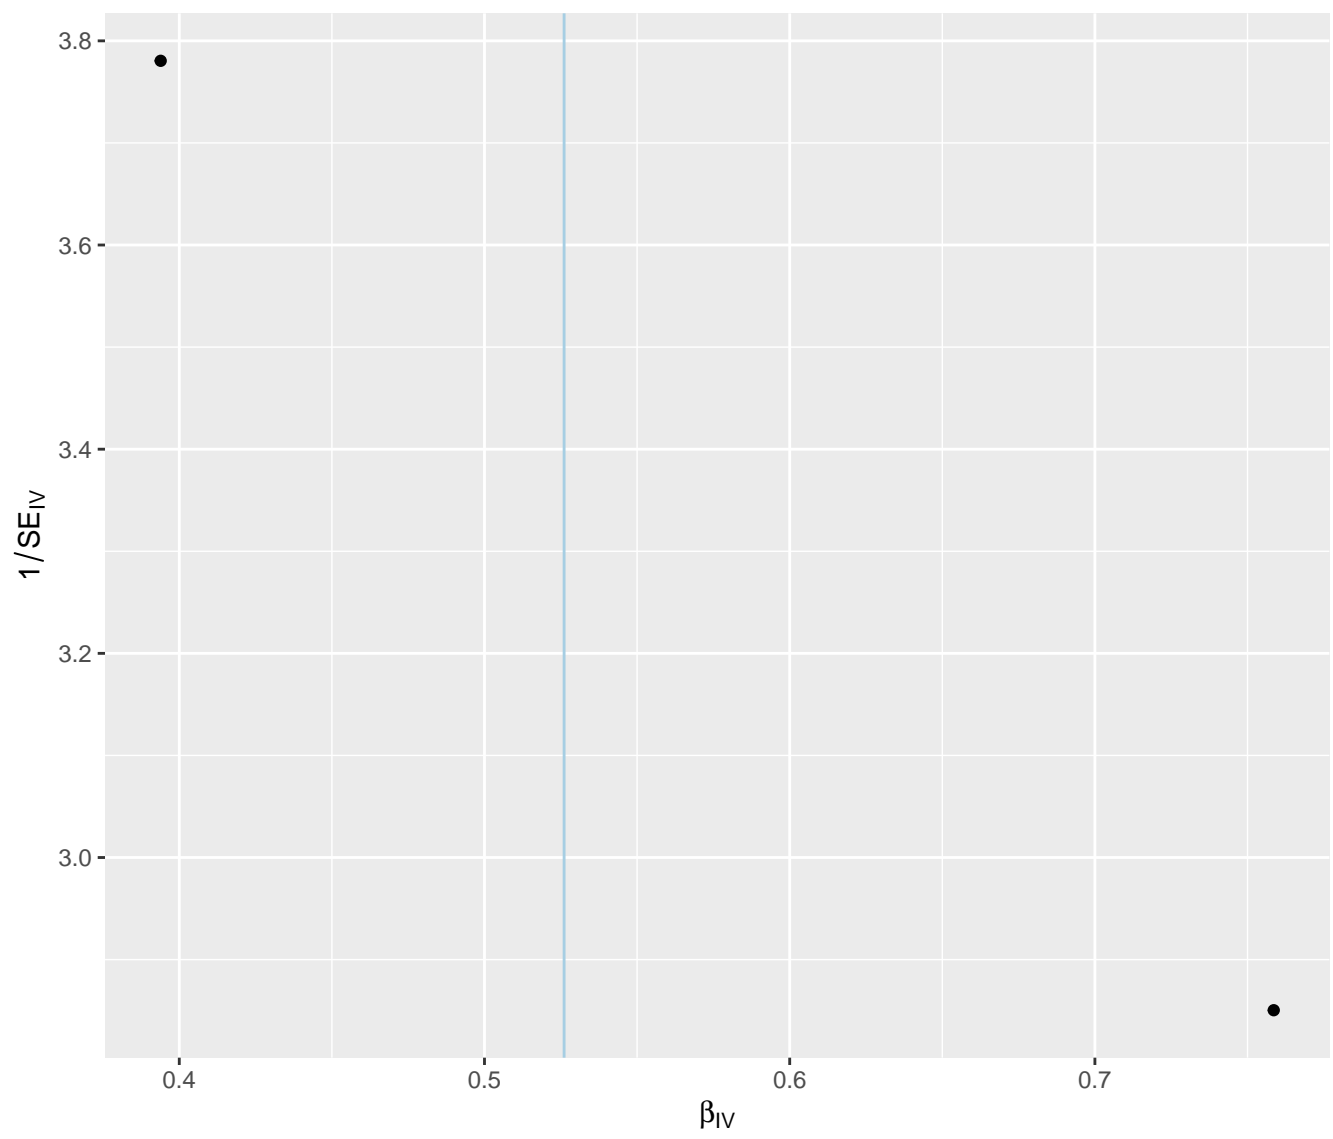

### MR Method

- Inverse variance weighted
- MR Egger

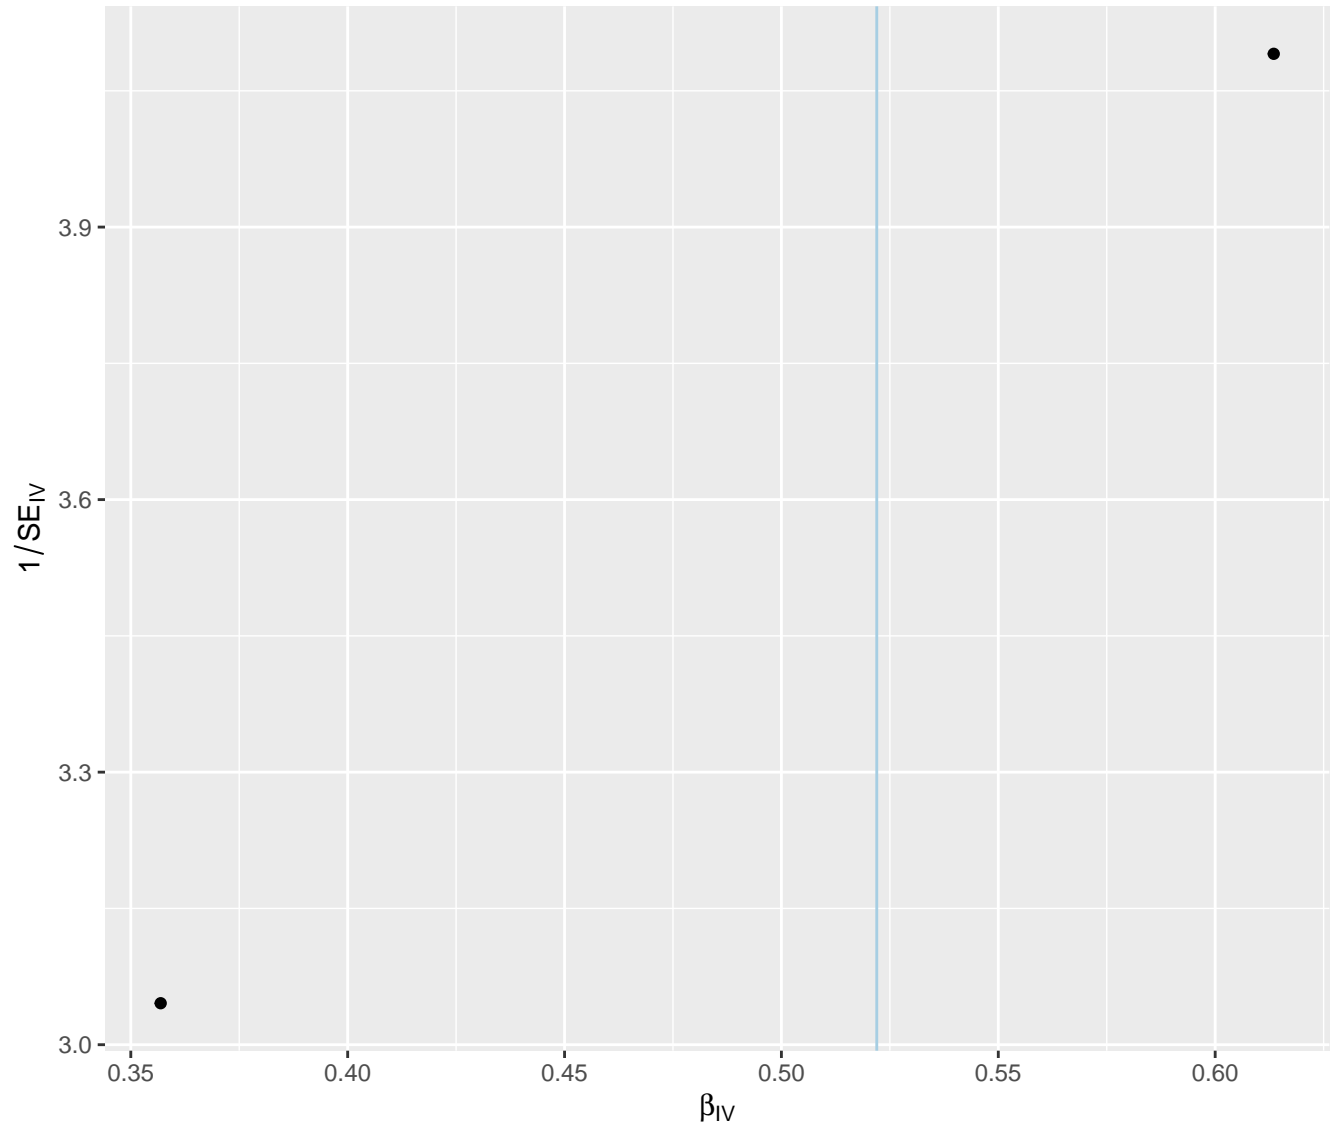

### MR Method

- Inverse variance weighted
- MR Egger

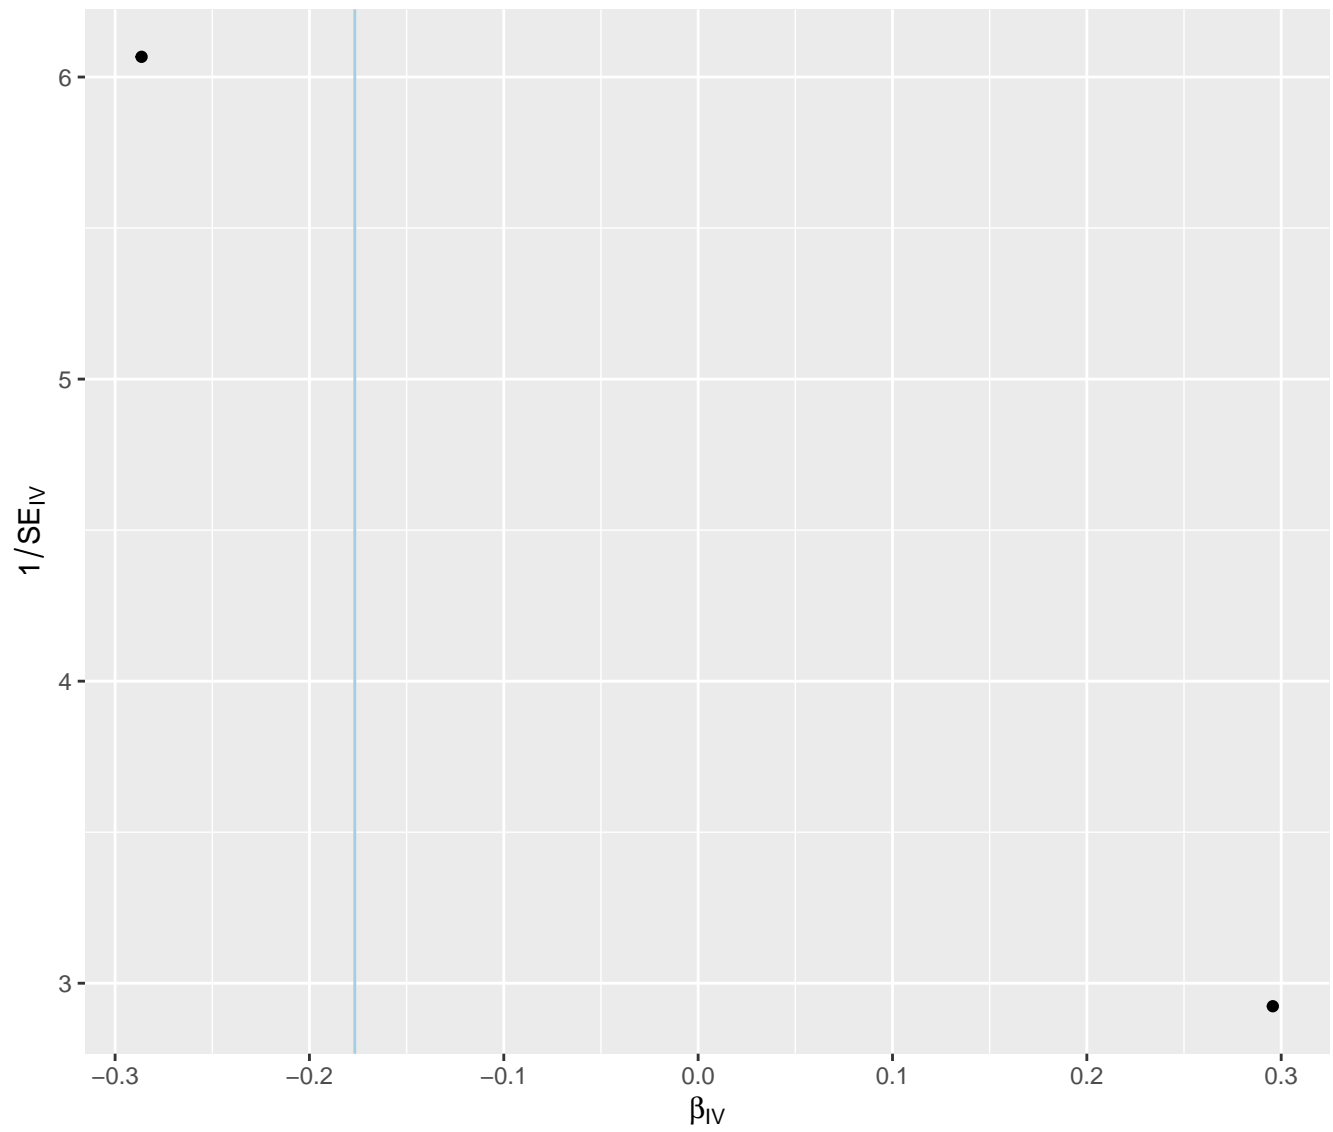

### MR Method

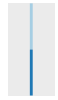

Inverse variance weighted

MR Egger

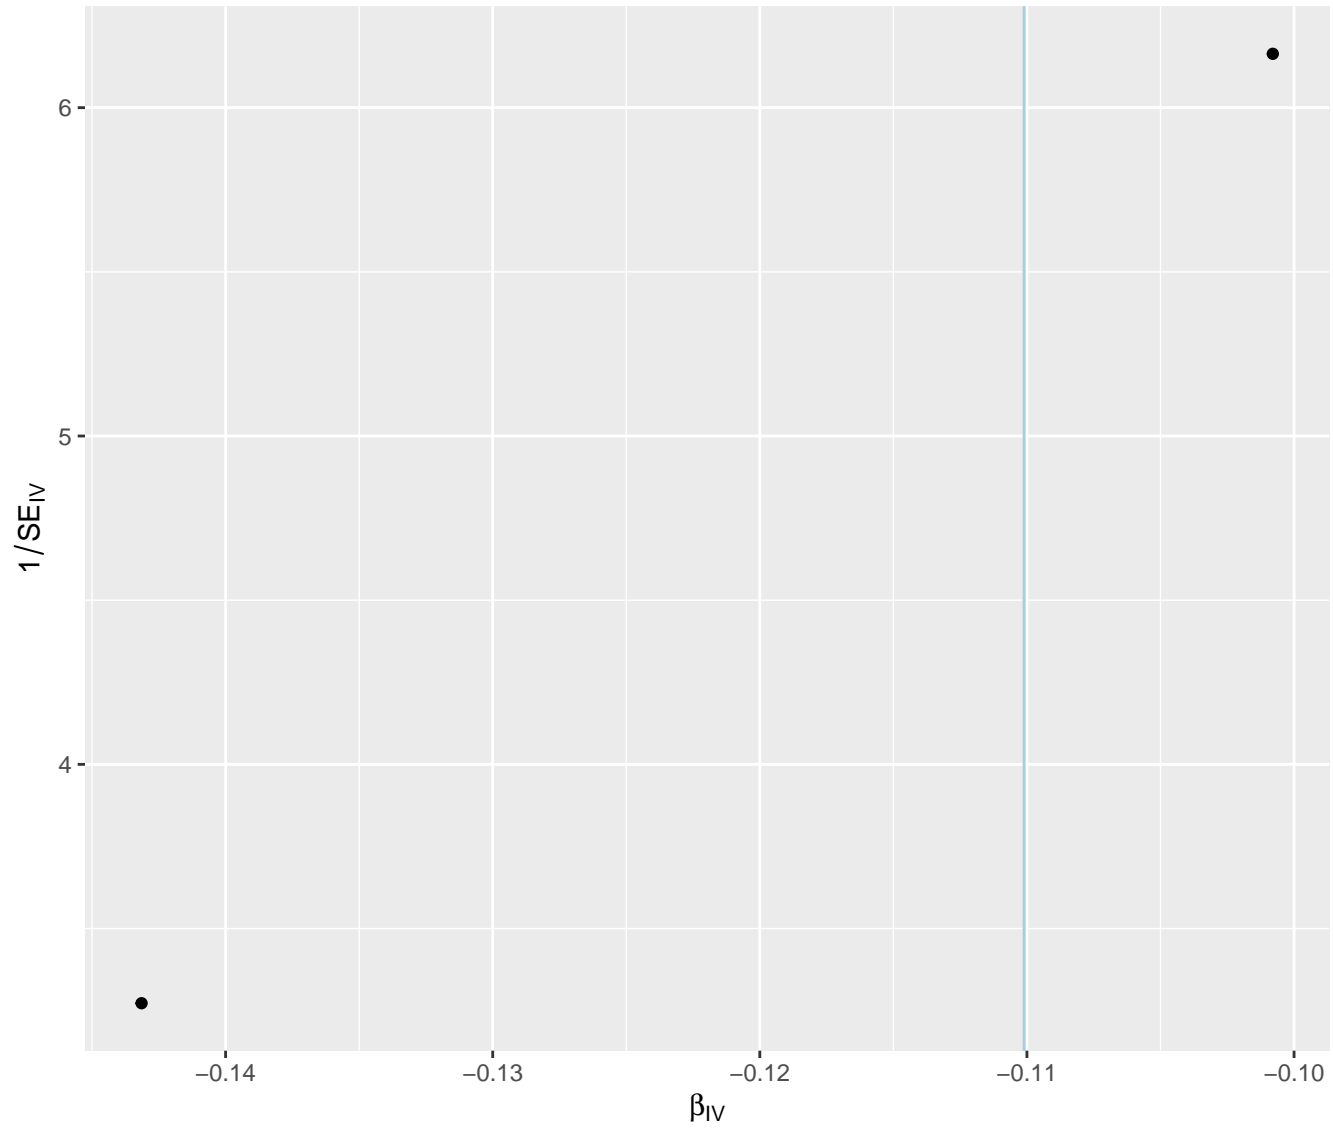

### MR Method

- Inverse variance weighted
- MR Egger

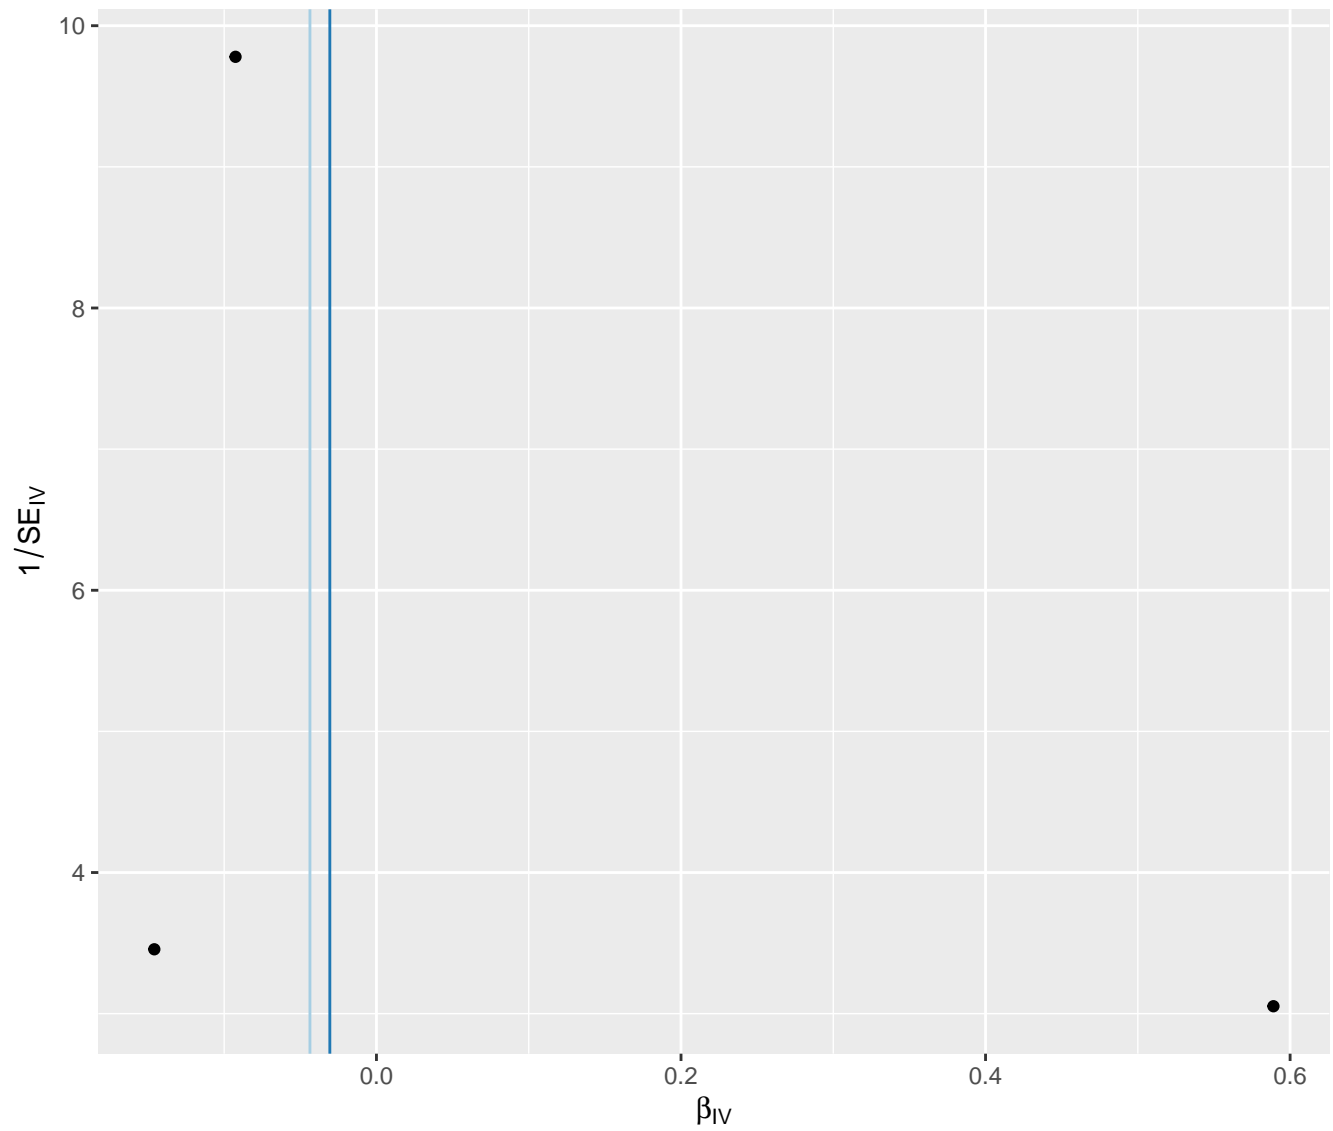

### MR Method

- Inverse variance weighted
- MR Egger

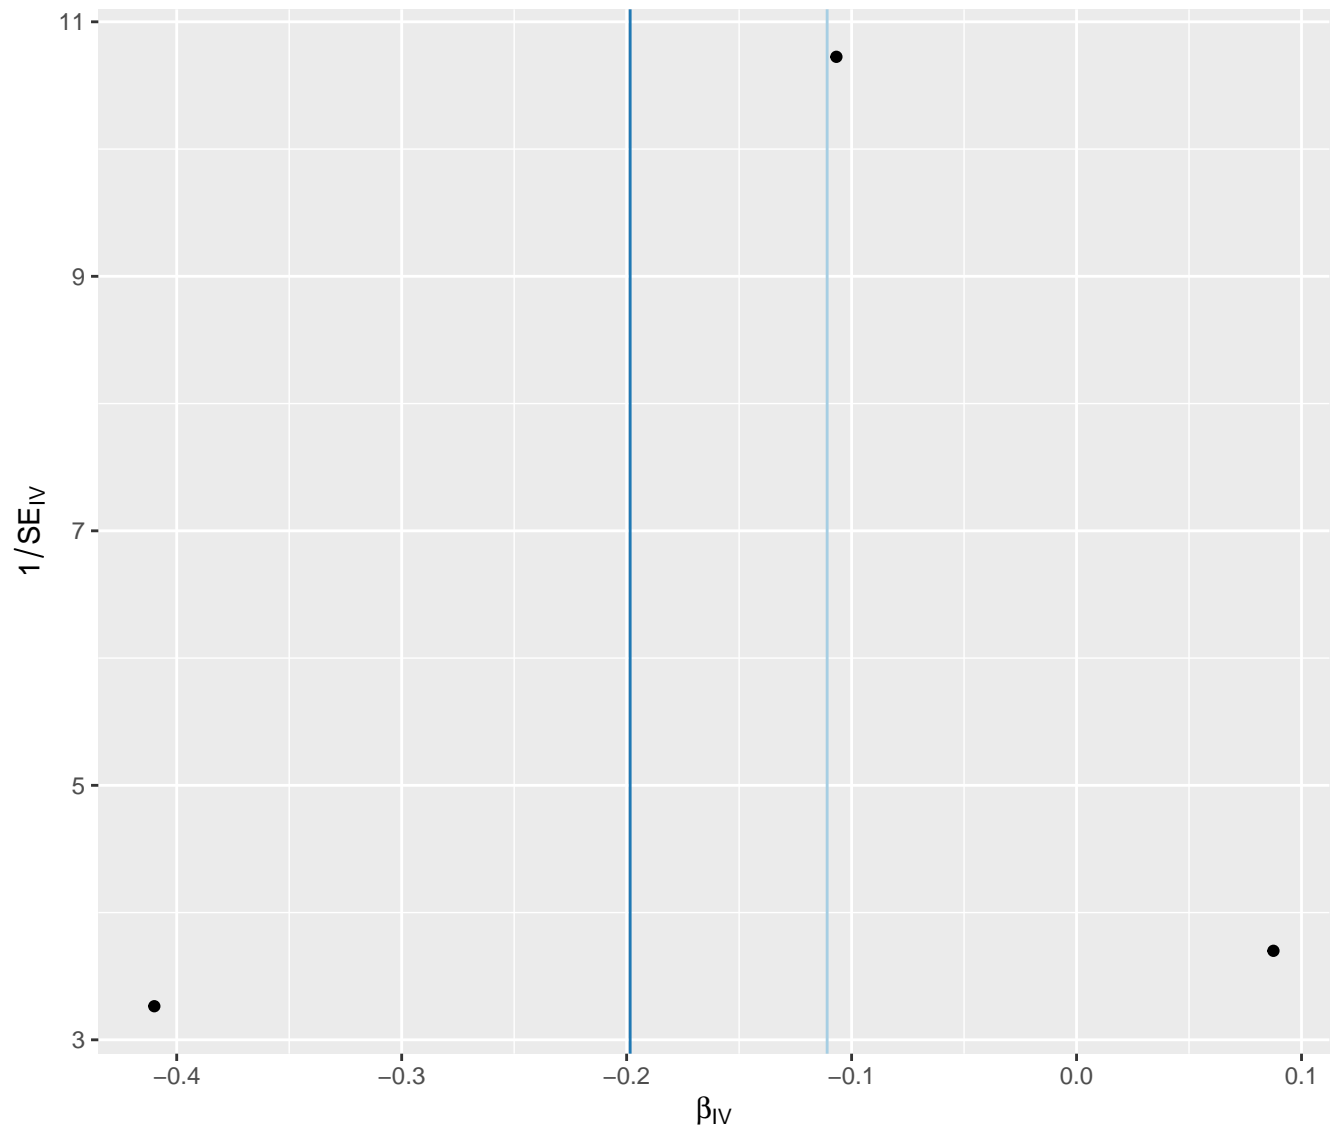

### MR Method

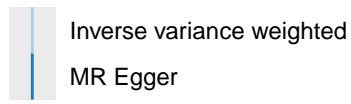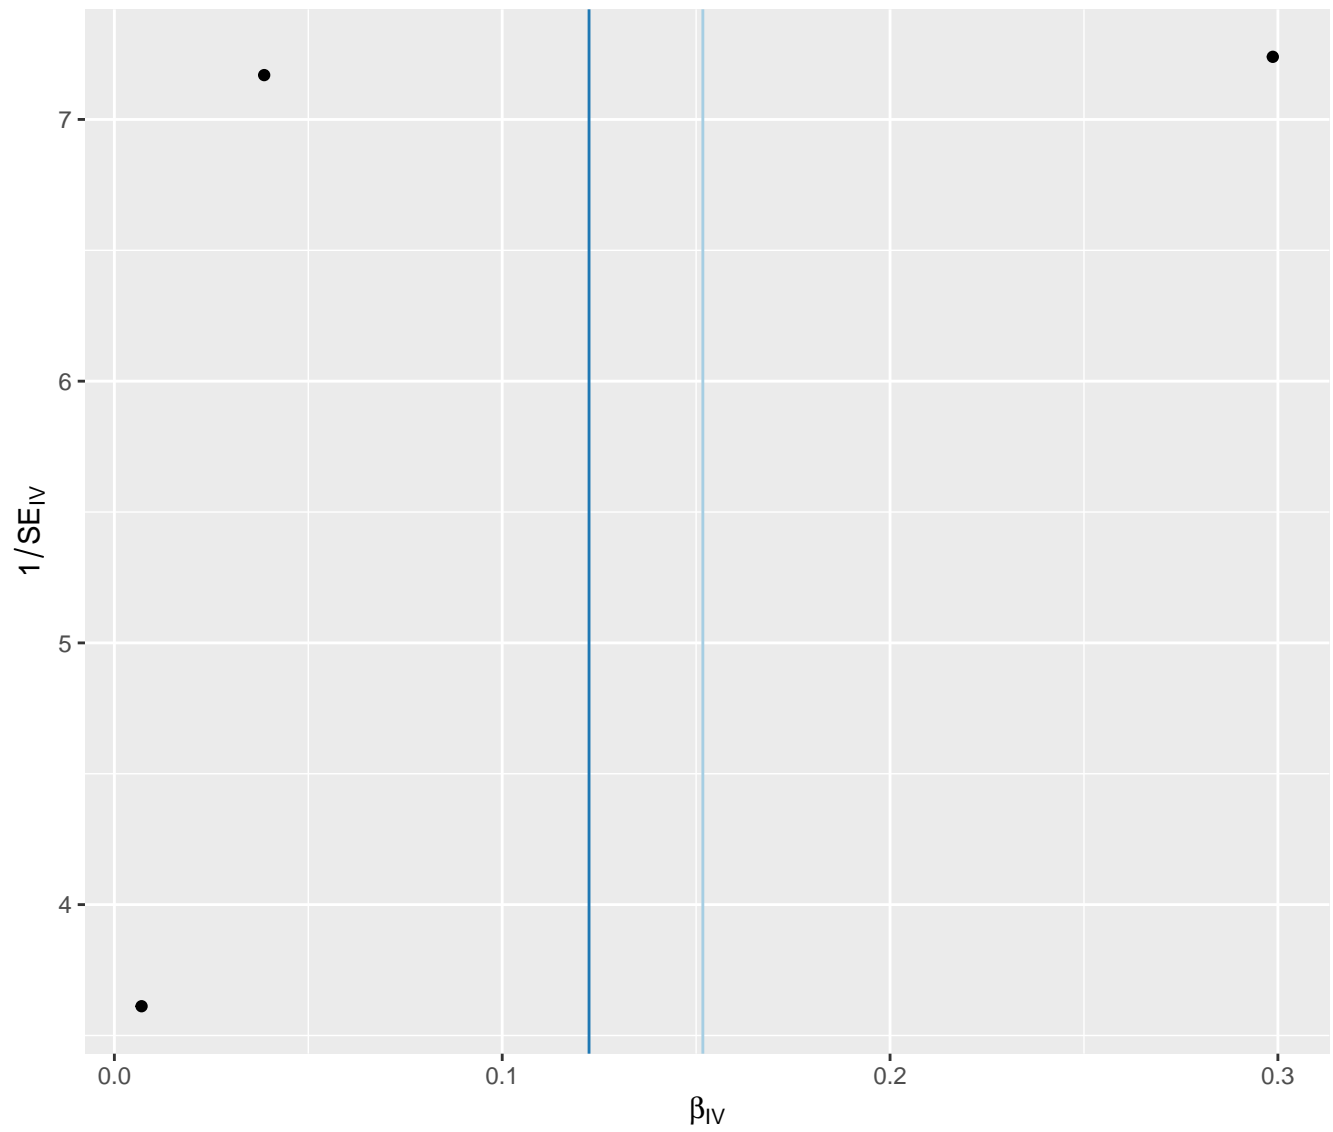

### MR Method

- Inverse variance weighted
- MR Egger

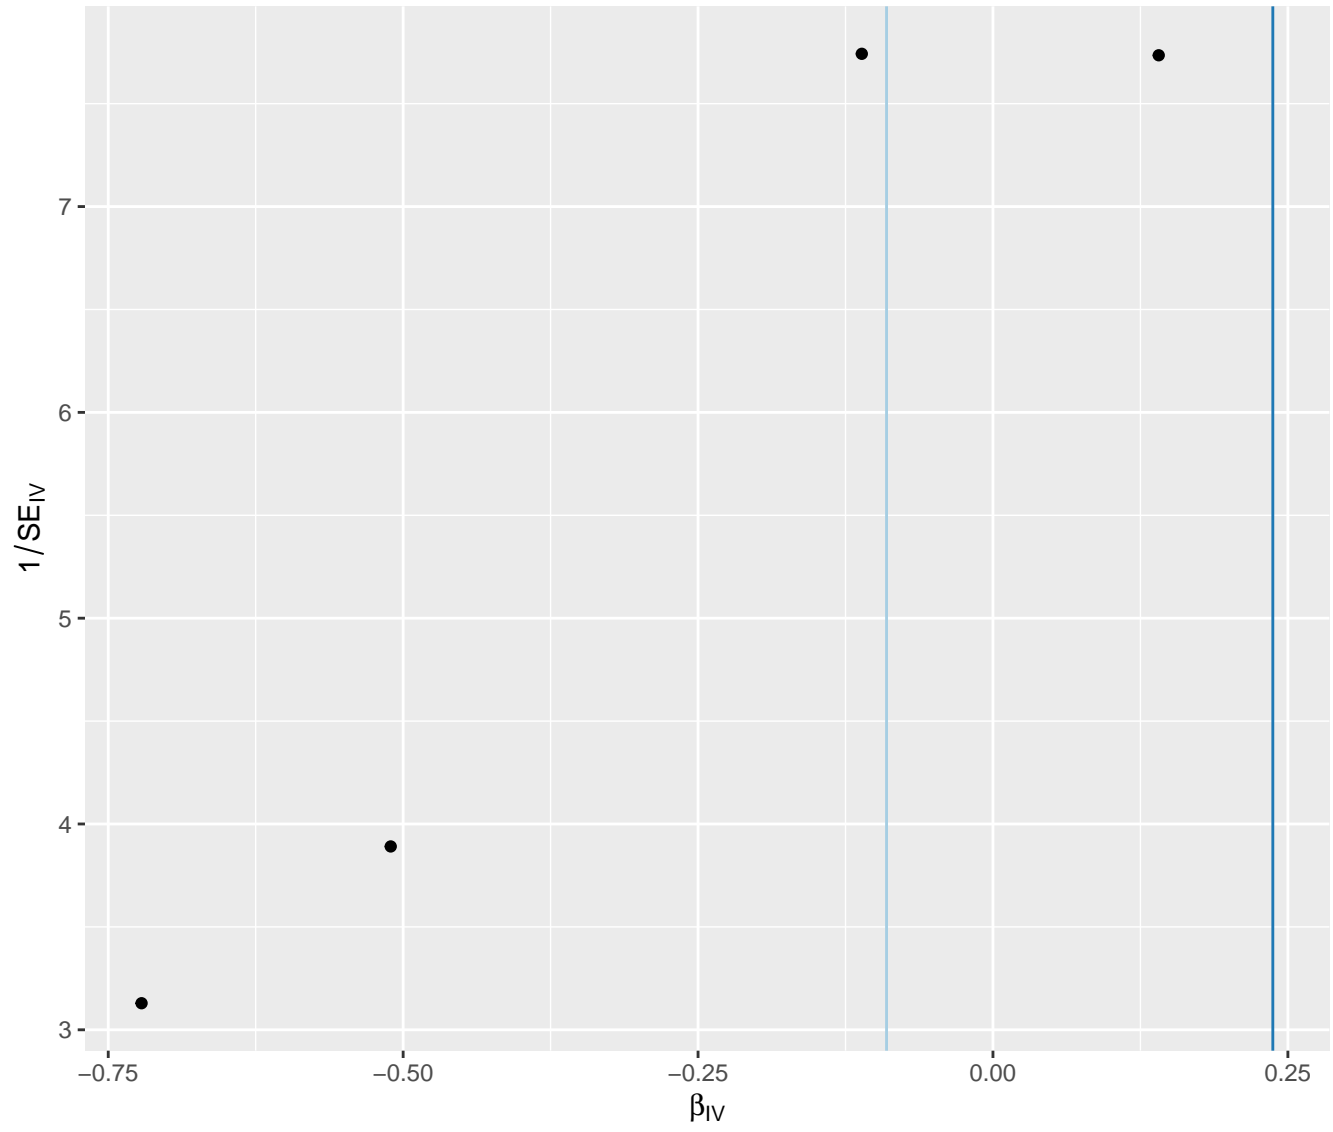



### MR Method

- Inverse variance weighted
- MR Egger

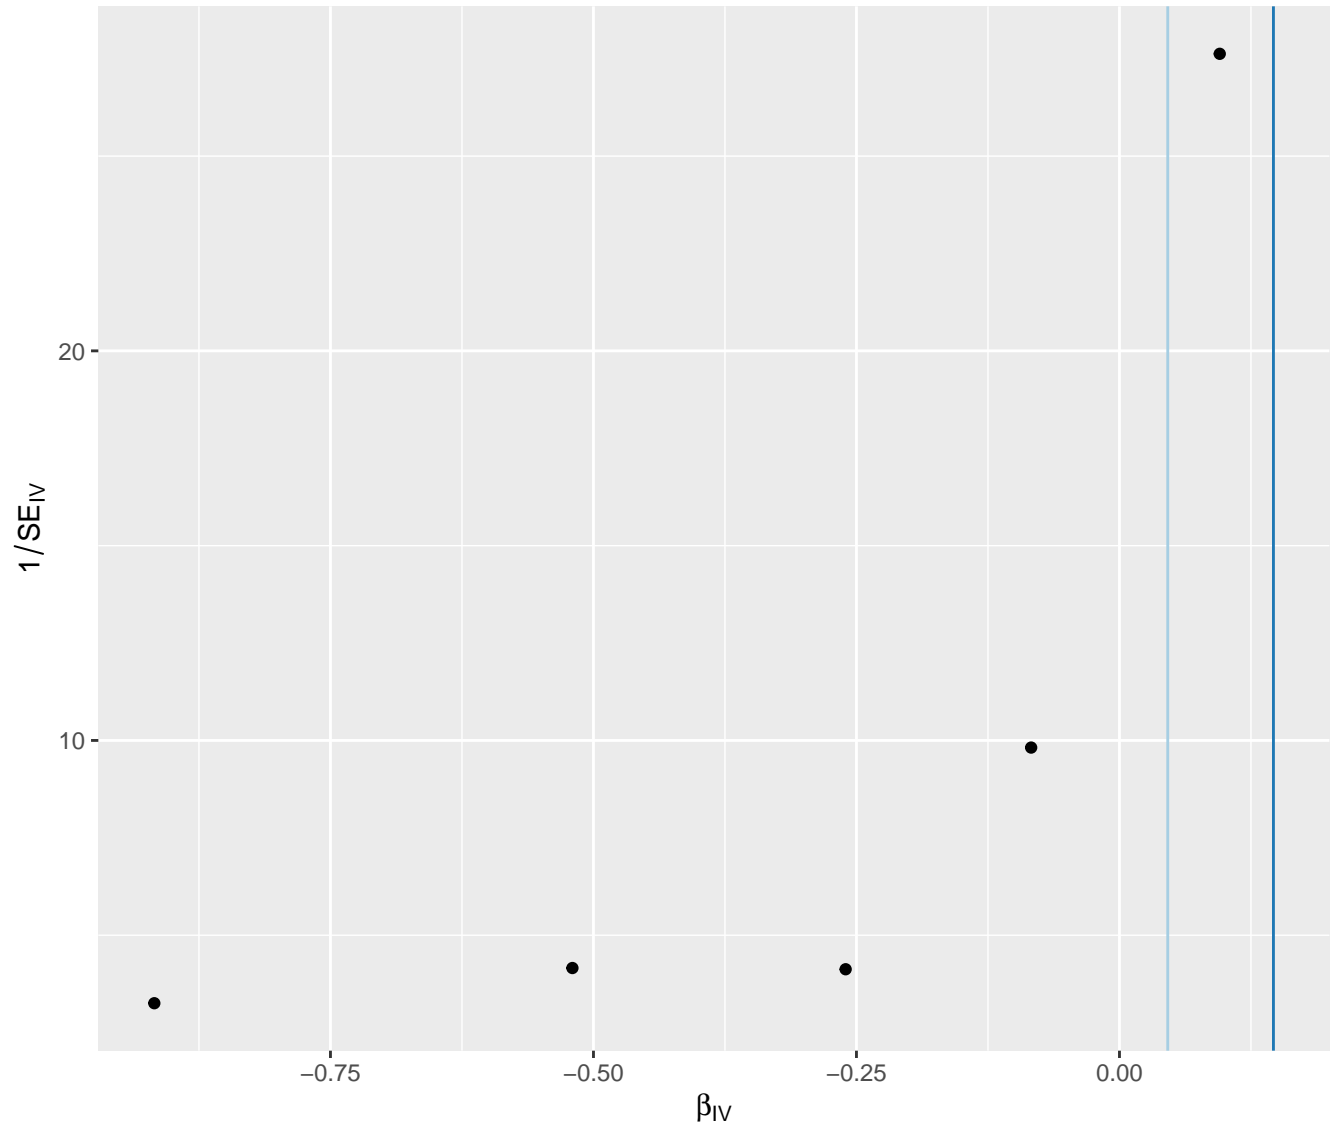

### MR Method

- Inverse variance weighted
- MR Egger

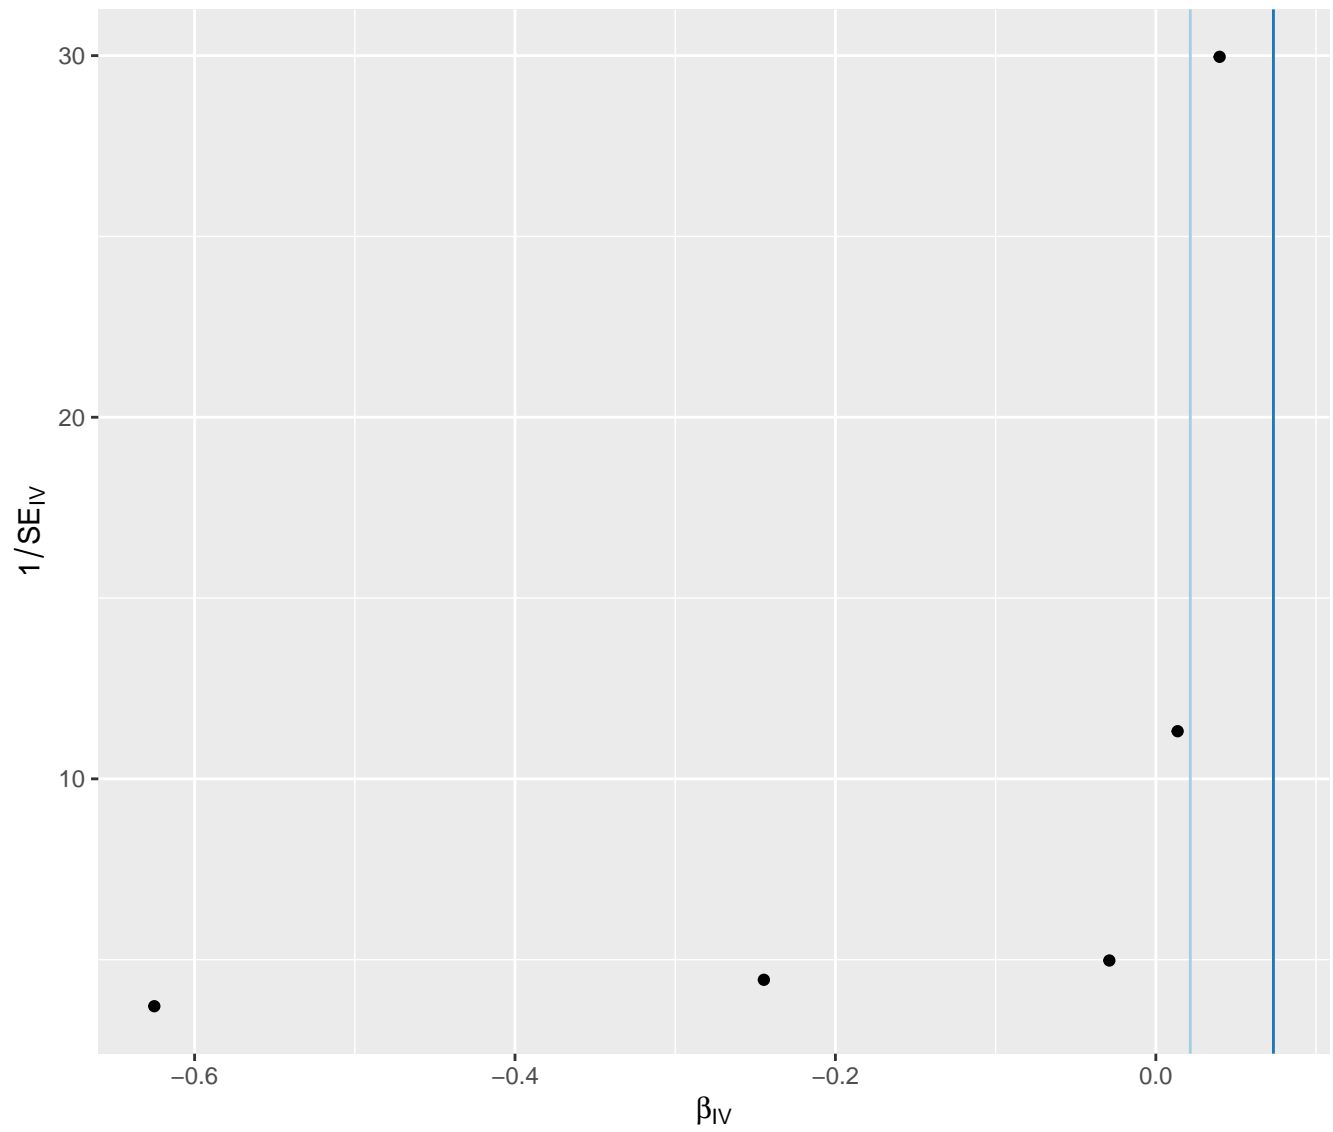

### MR Method

- Inverse variance weighted
- MR Egger

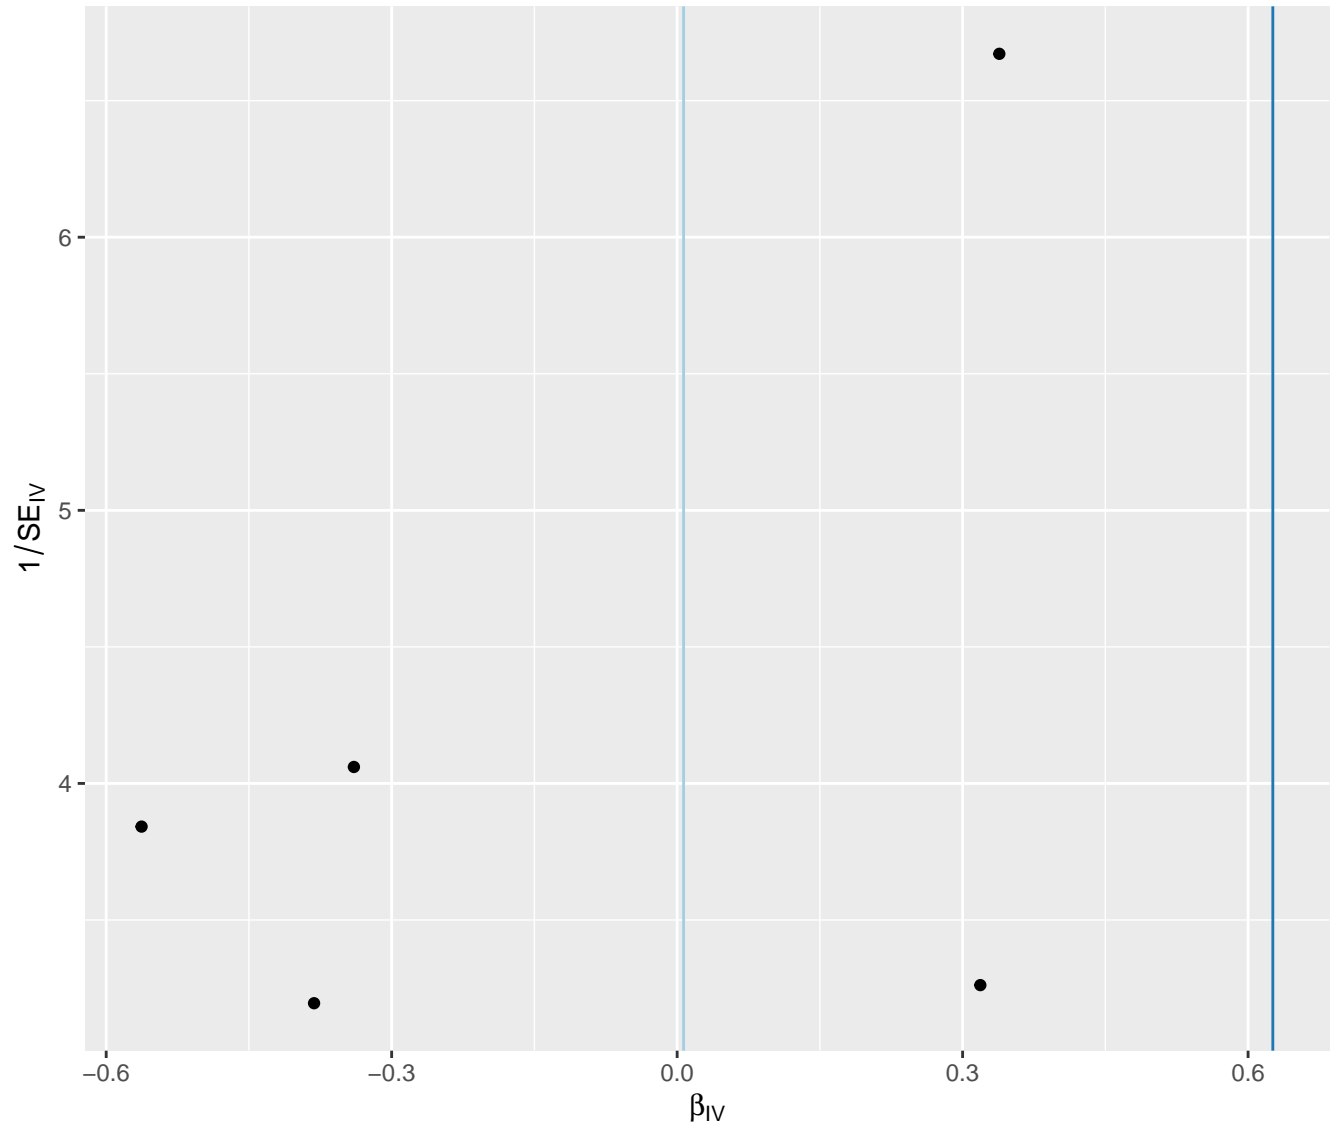

### MR Method

- Inverse variance weighted
- MR Egger

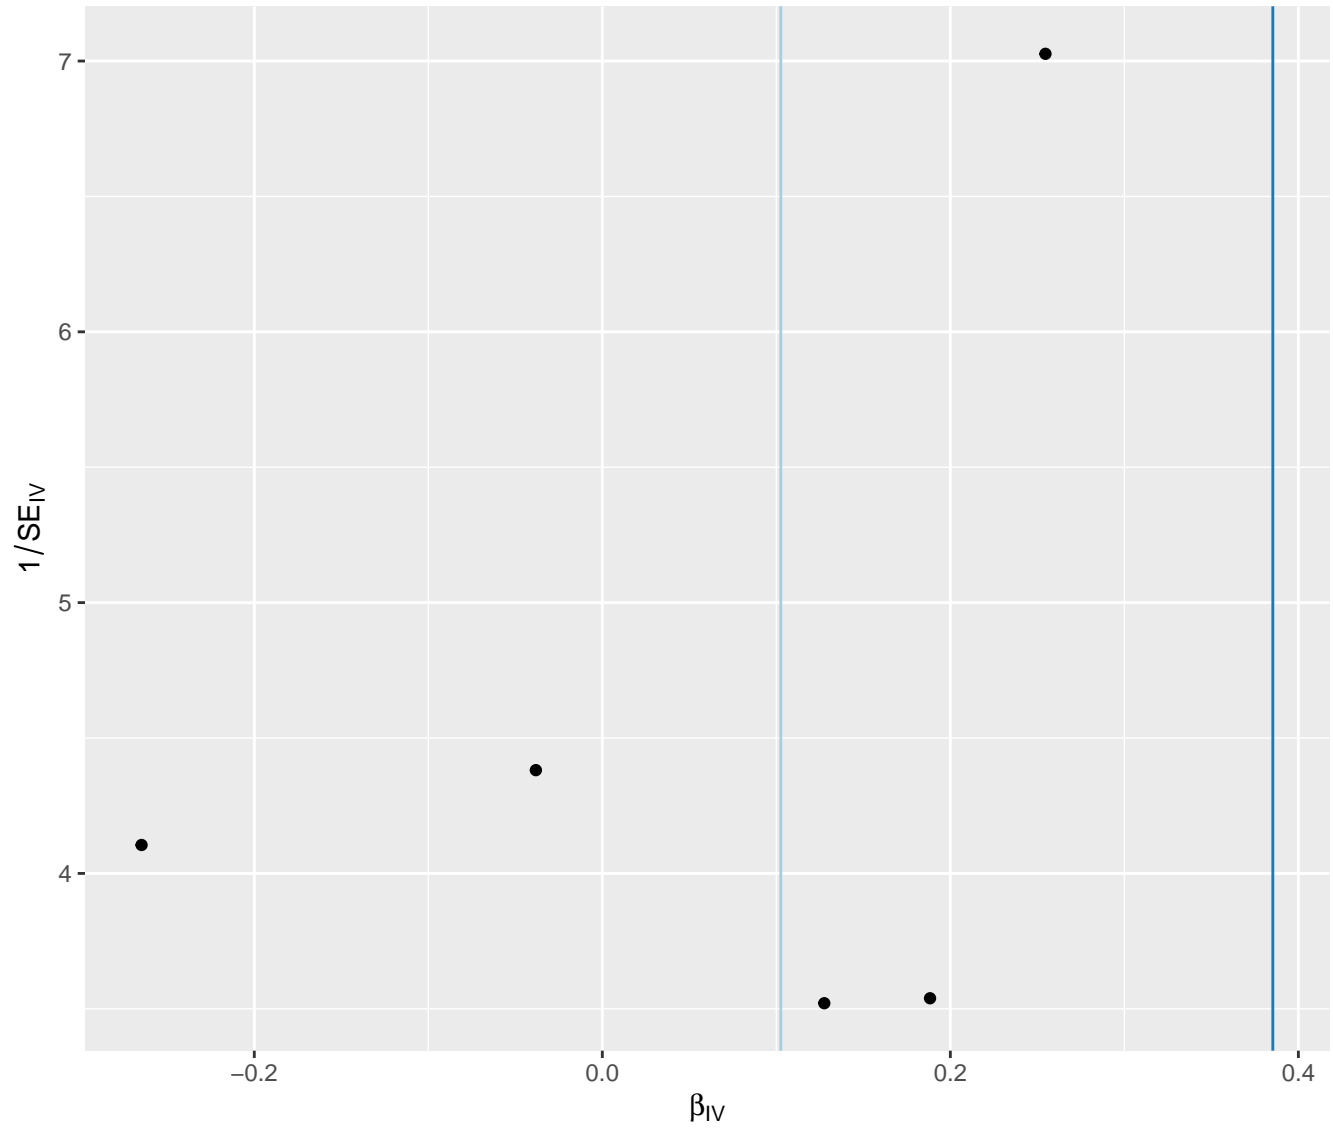

### MR Method

- Inverse variance weighted
- MR Egger

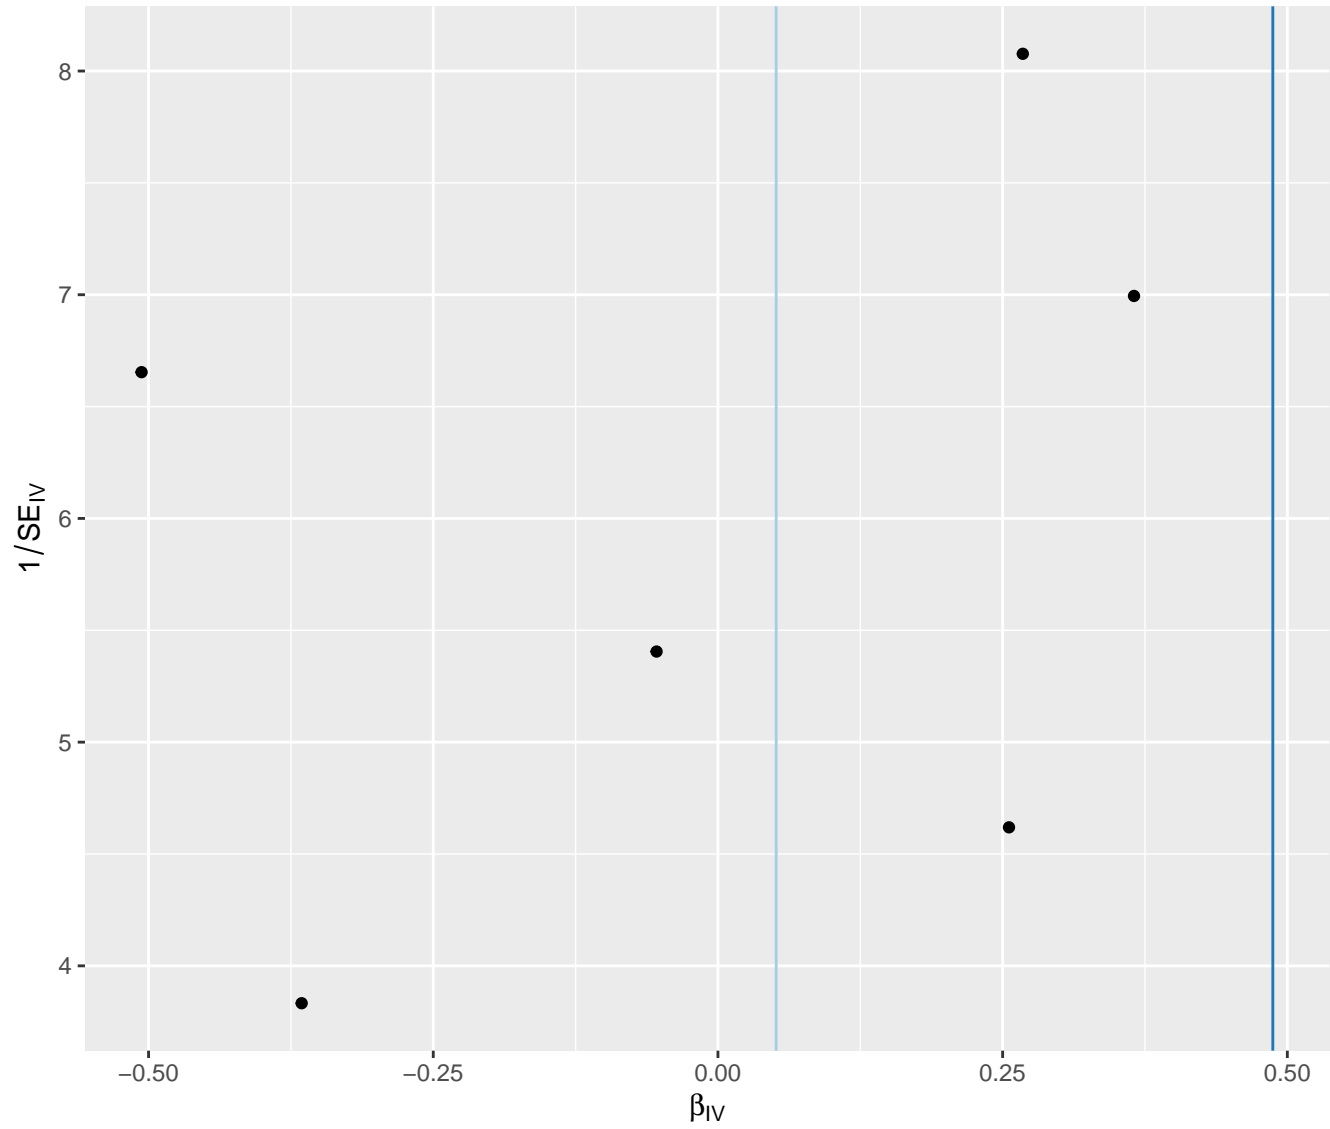

### MR Method

- Inverse variance weighted
- MR Egger

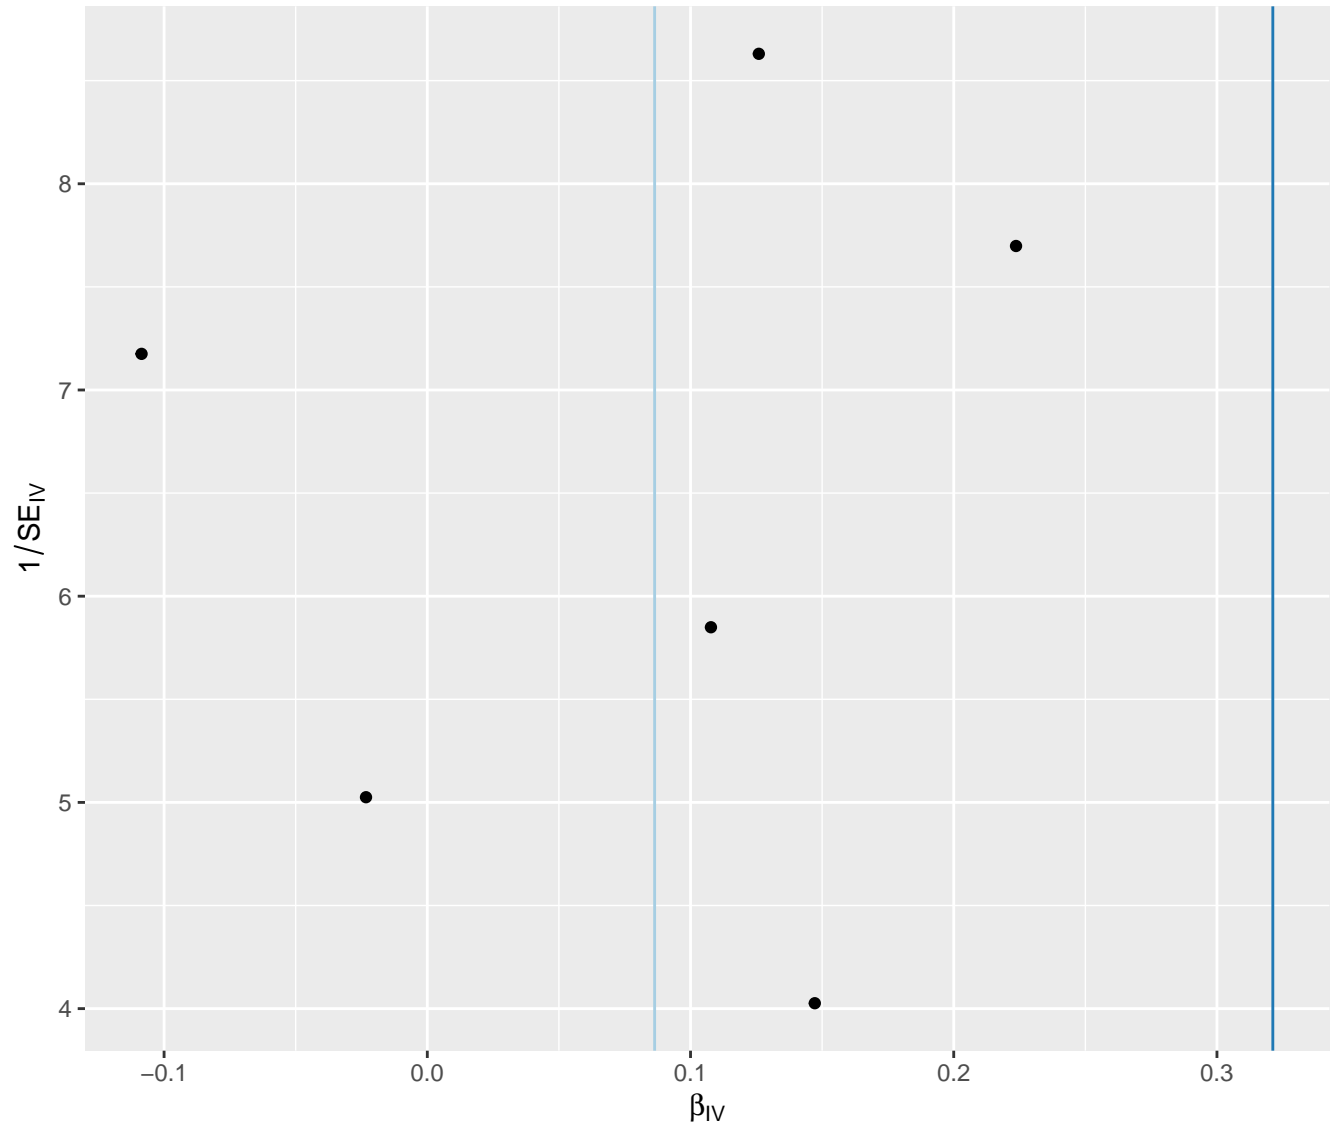

### MR Method

- Inverse variance weighted
- MR Egger

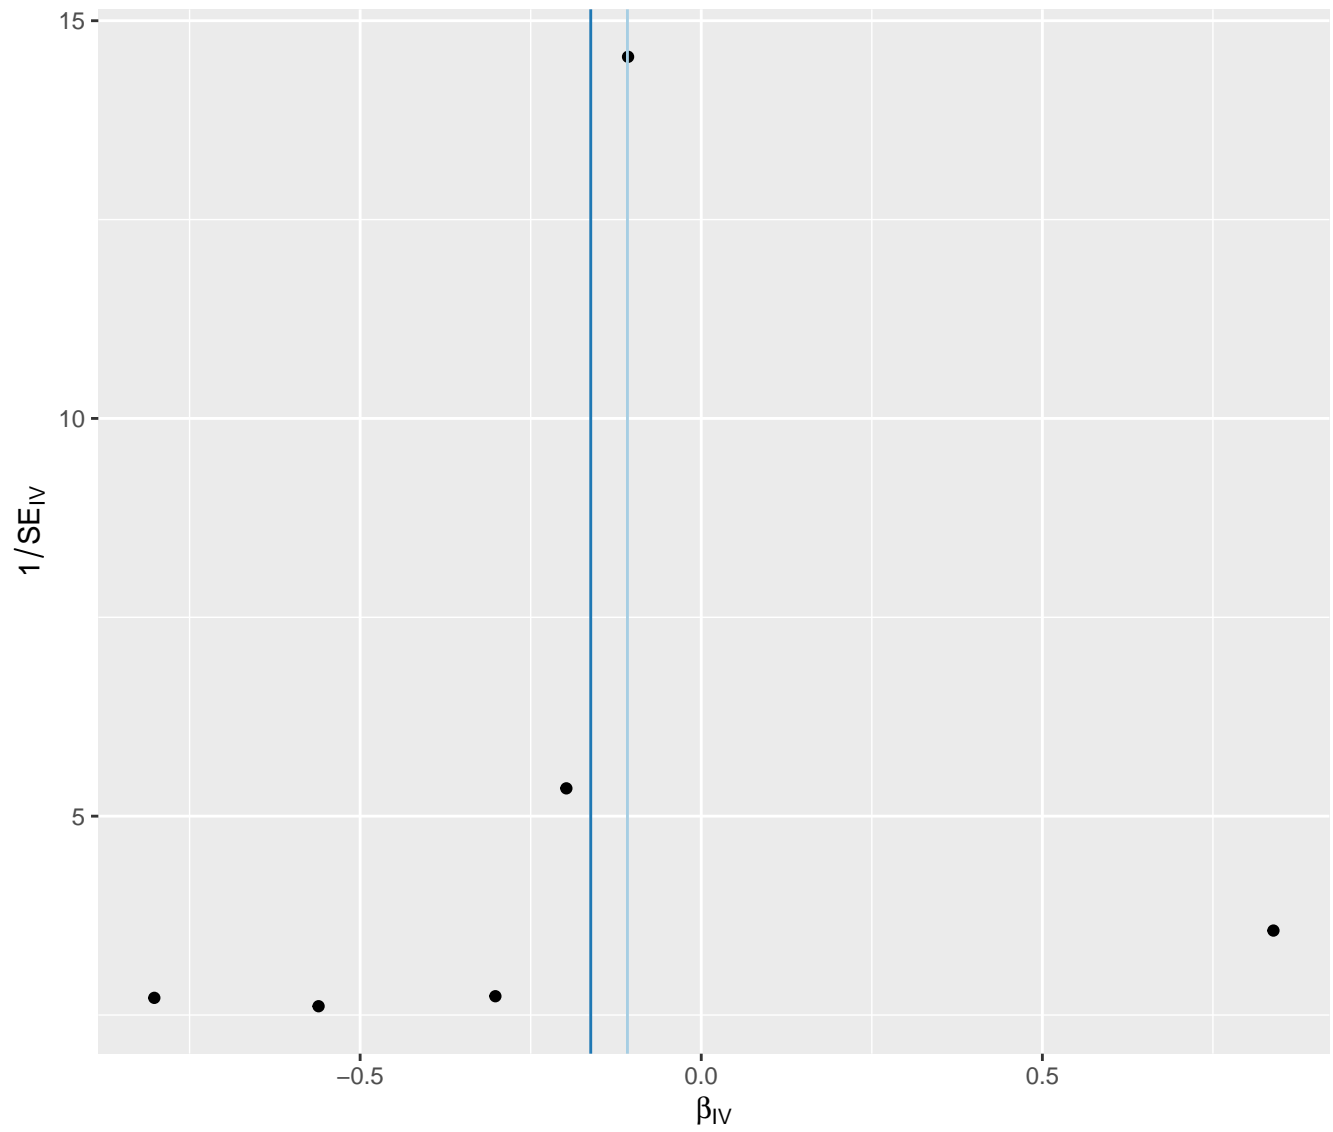

### MR Method

- Inverse variance weighted
- MR Egger

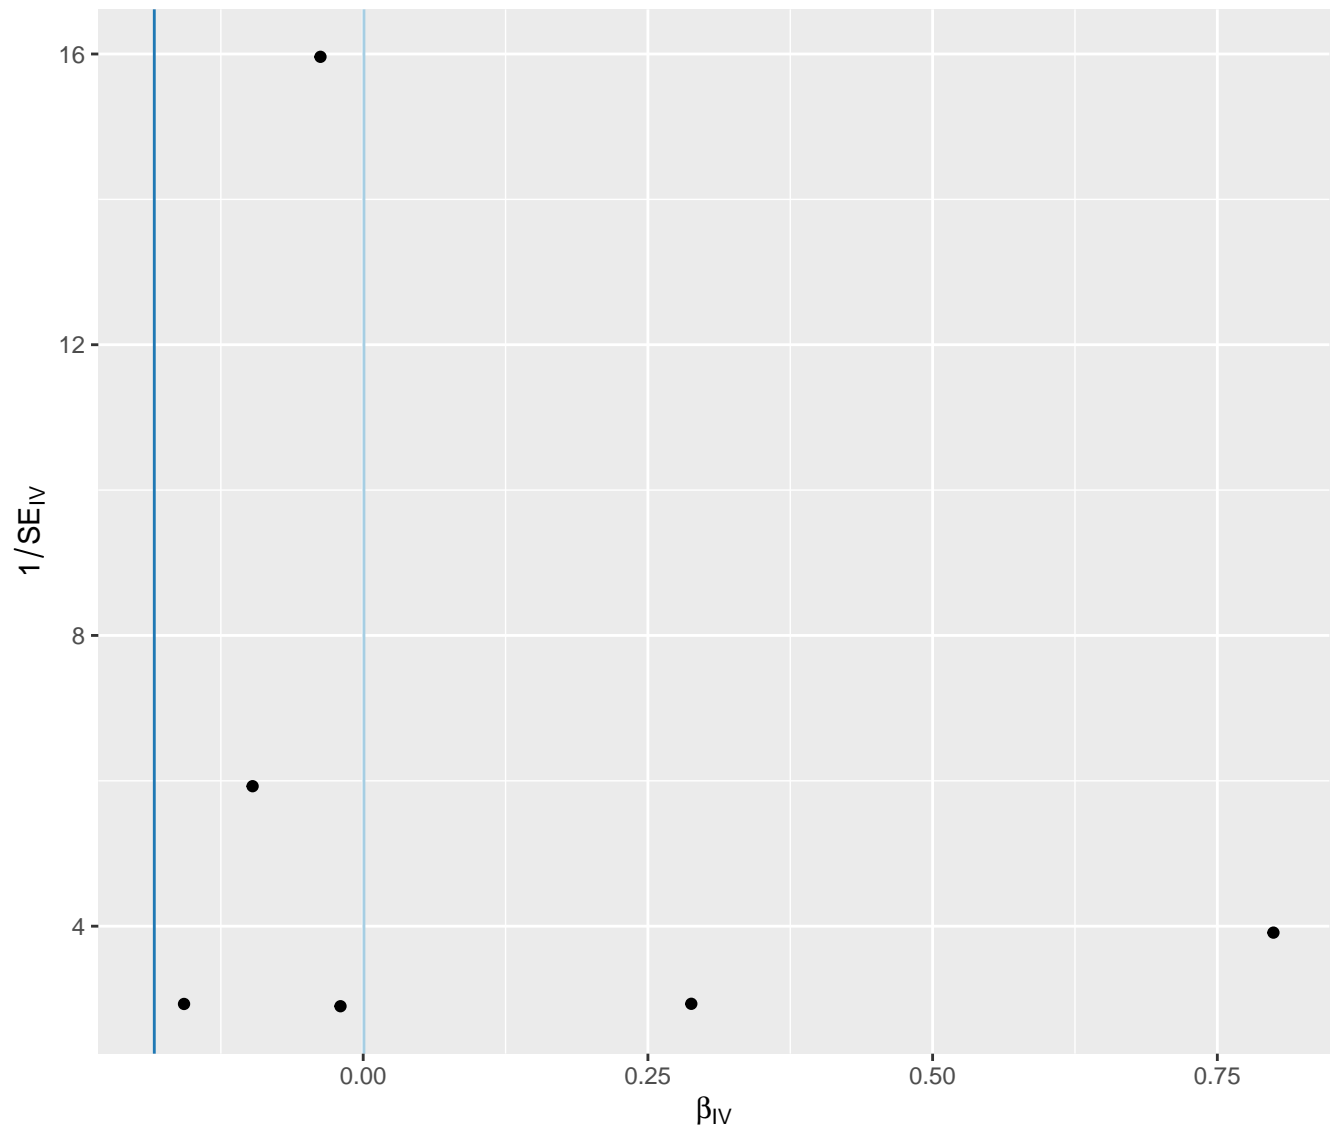



### MR Method

- Inverse variance weighted
- MR Egger

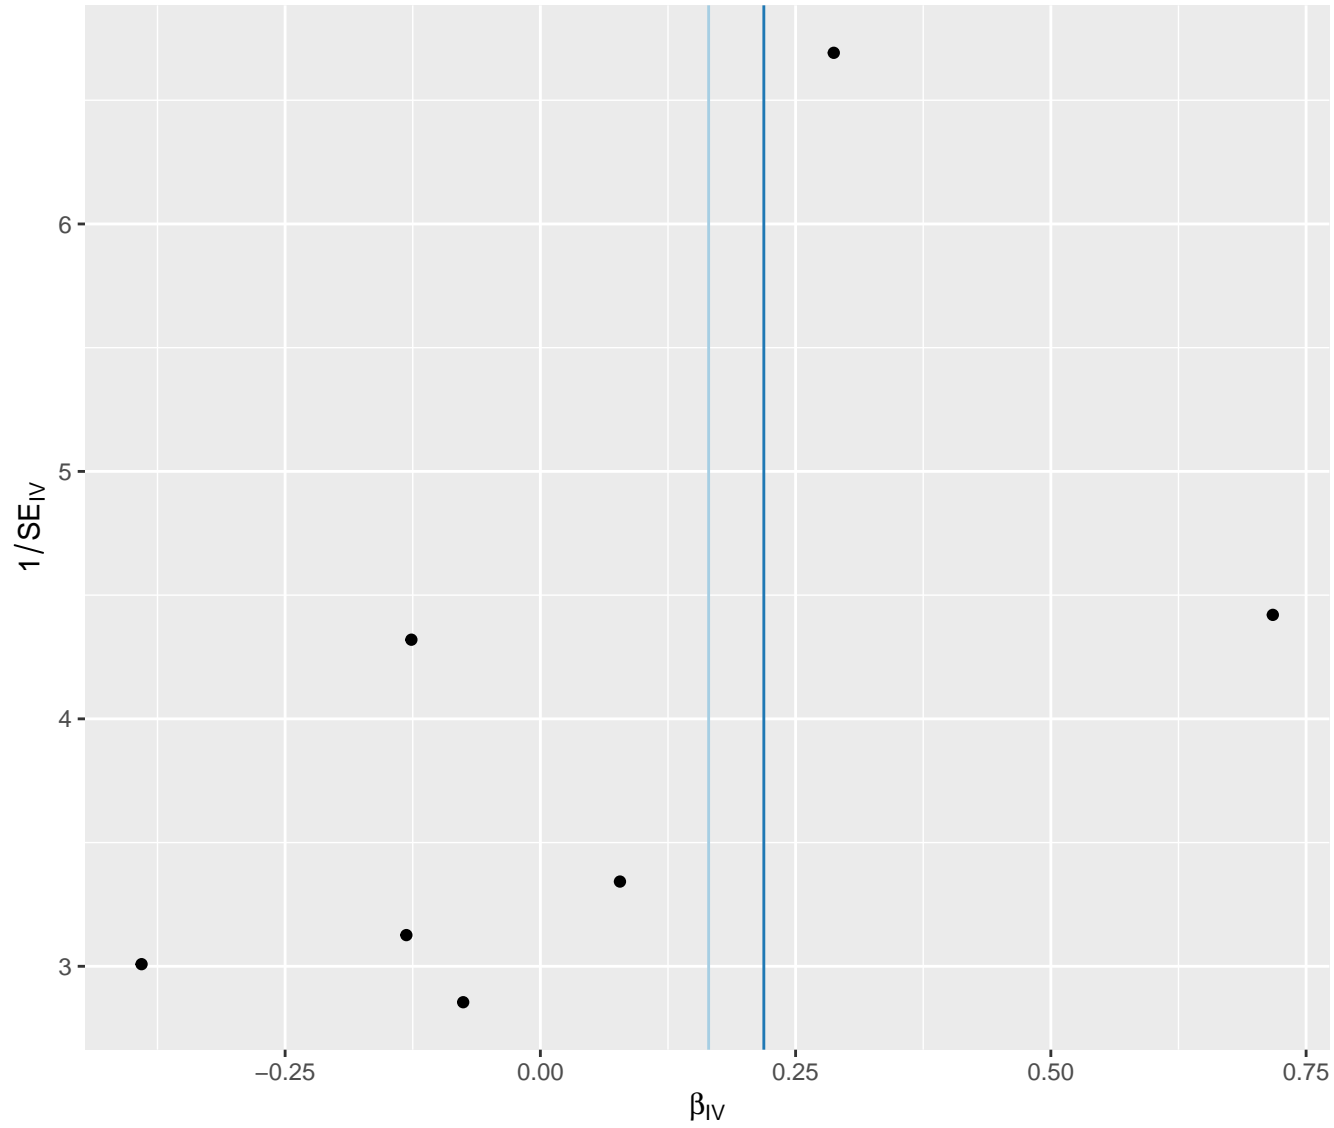

### MR Method

- Inverse variance weighted
- MR Egger

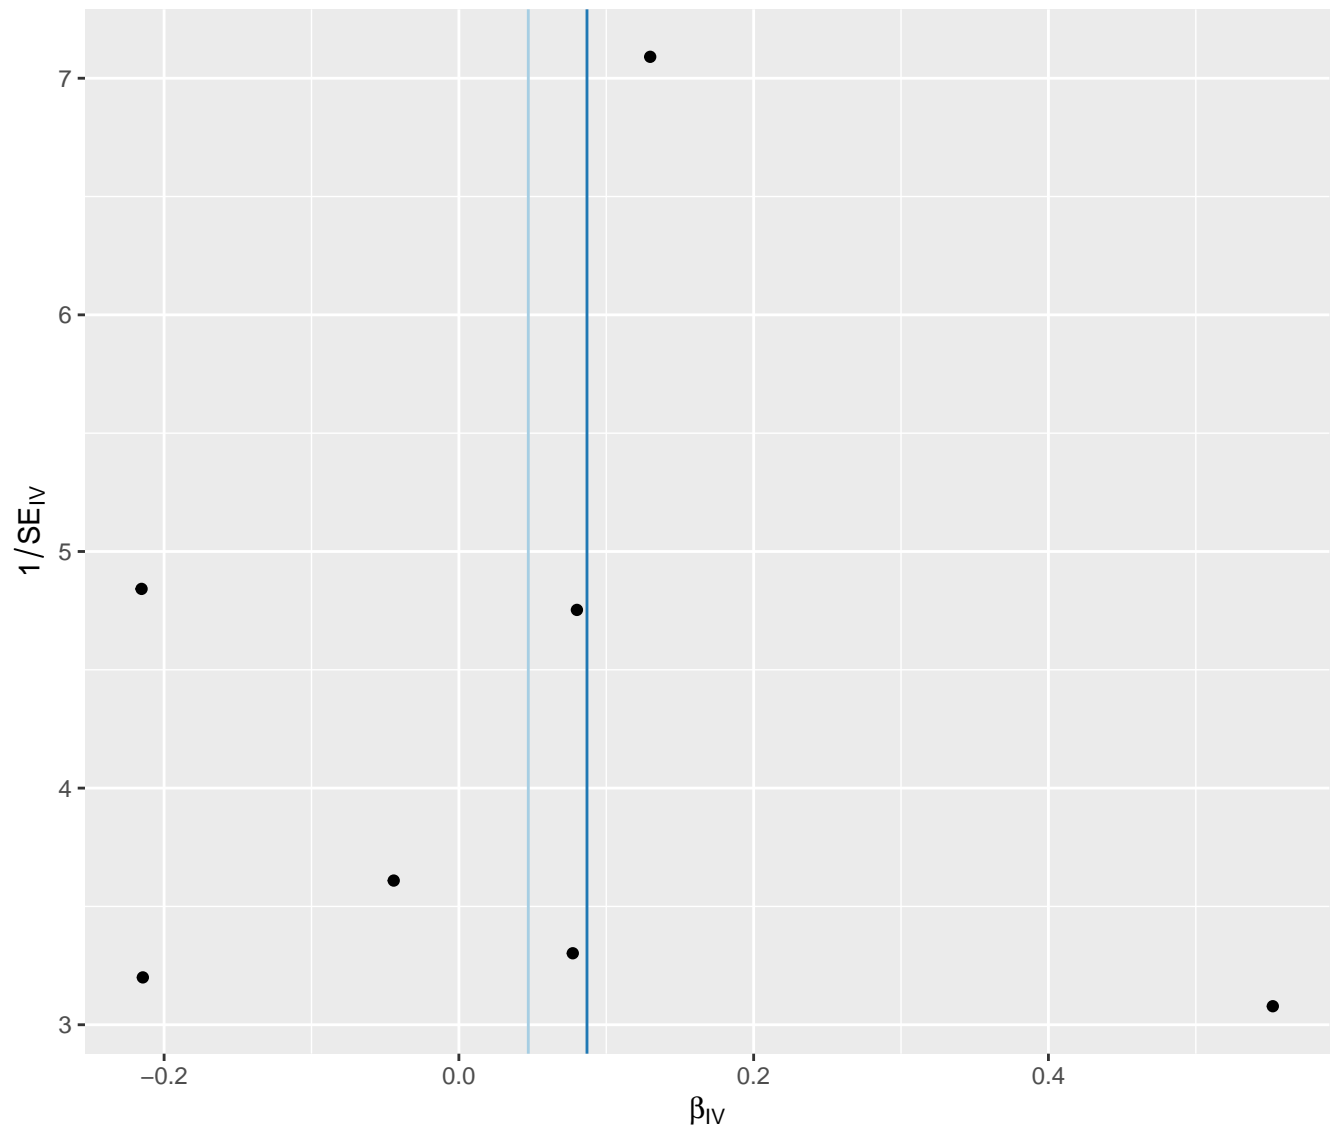

### MR Method

- Inverse variance weighted
- MR Egger

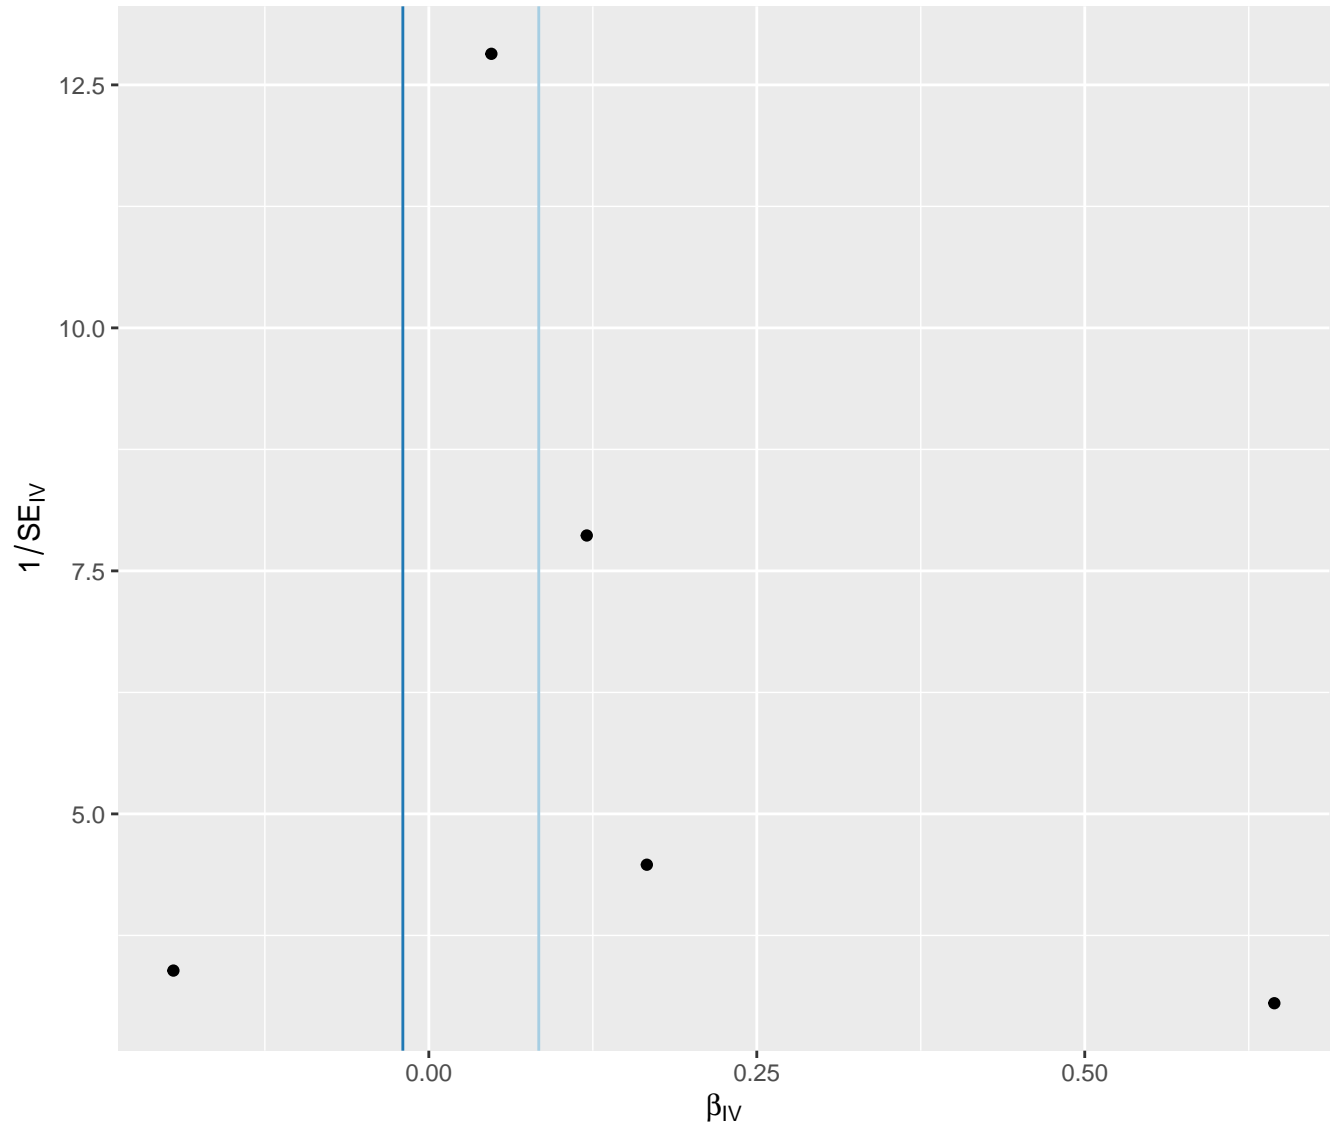

### MR Method

- Inverse variance weighted
- MR Egger

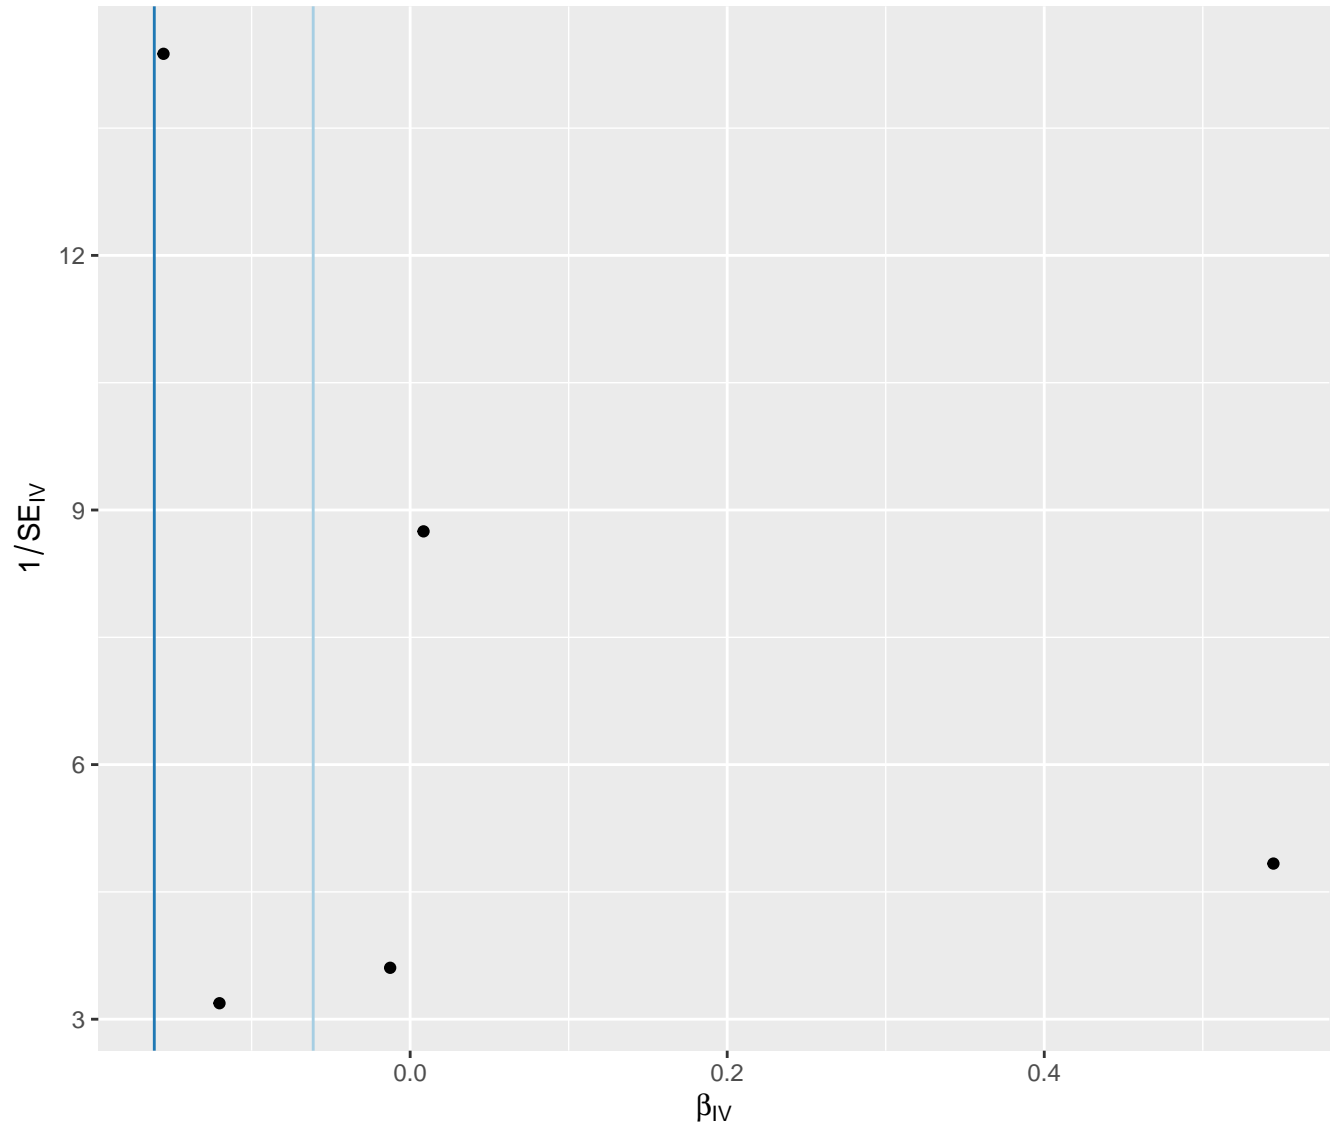

MR Method

- Inverse variance weighted
- MR Egger

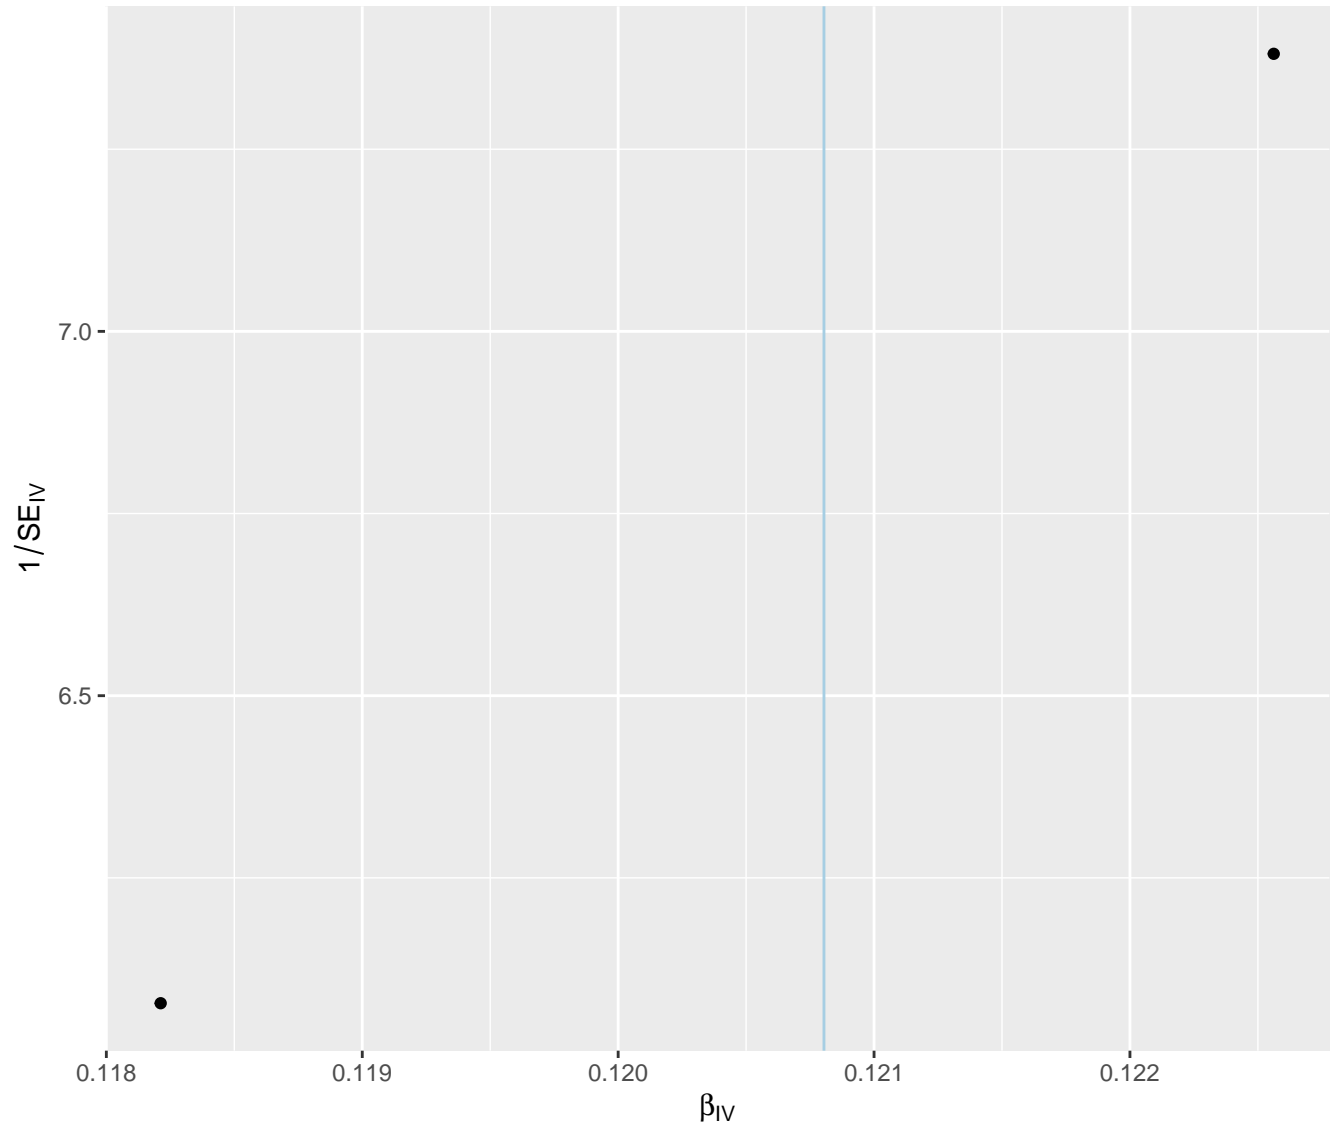

### MR Method

- Inverse variance weighted
- MR Egger

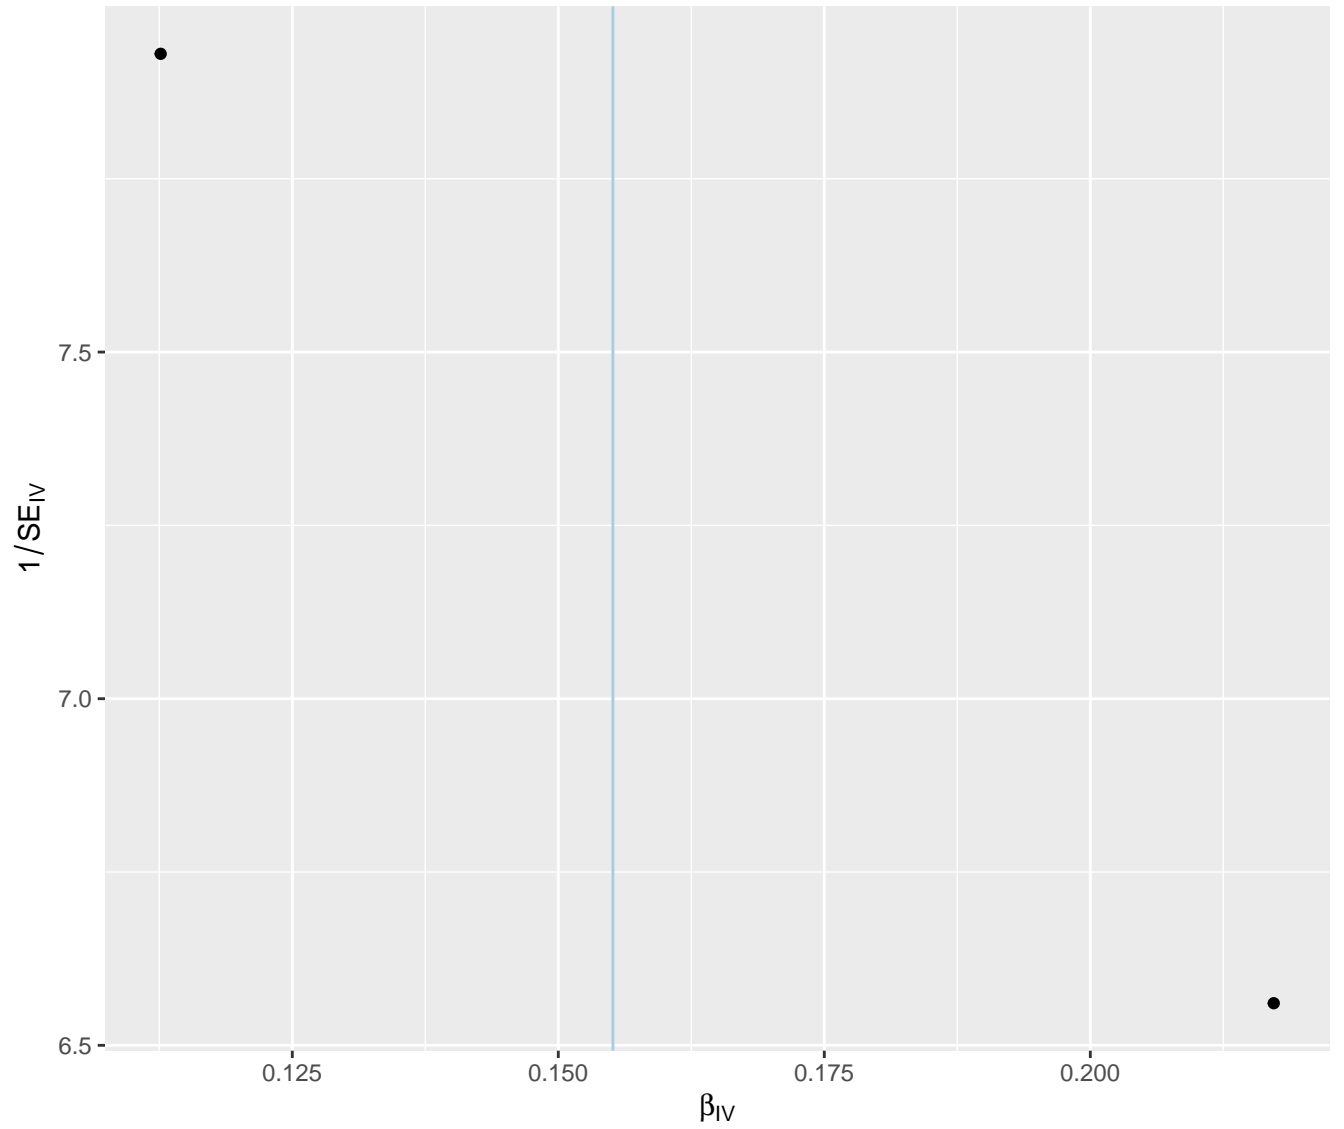

### MR Method

- Inverse variance weighted
- MR Egger

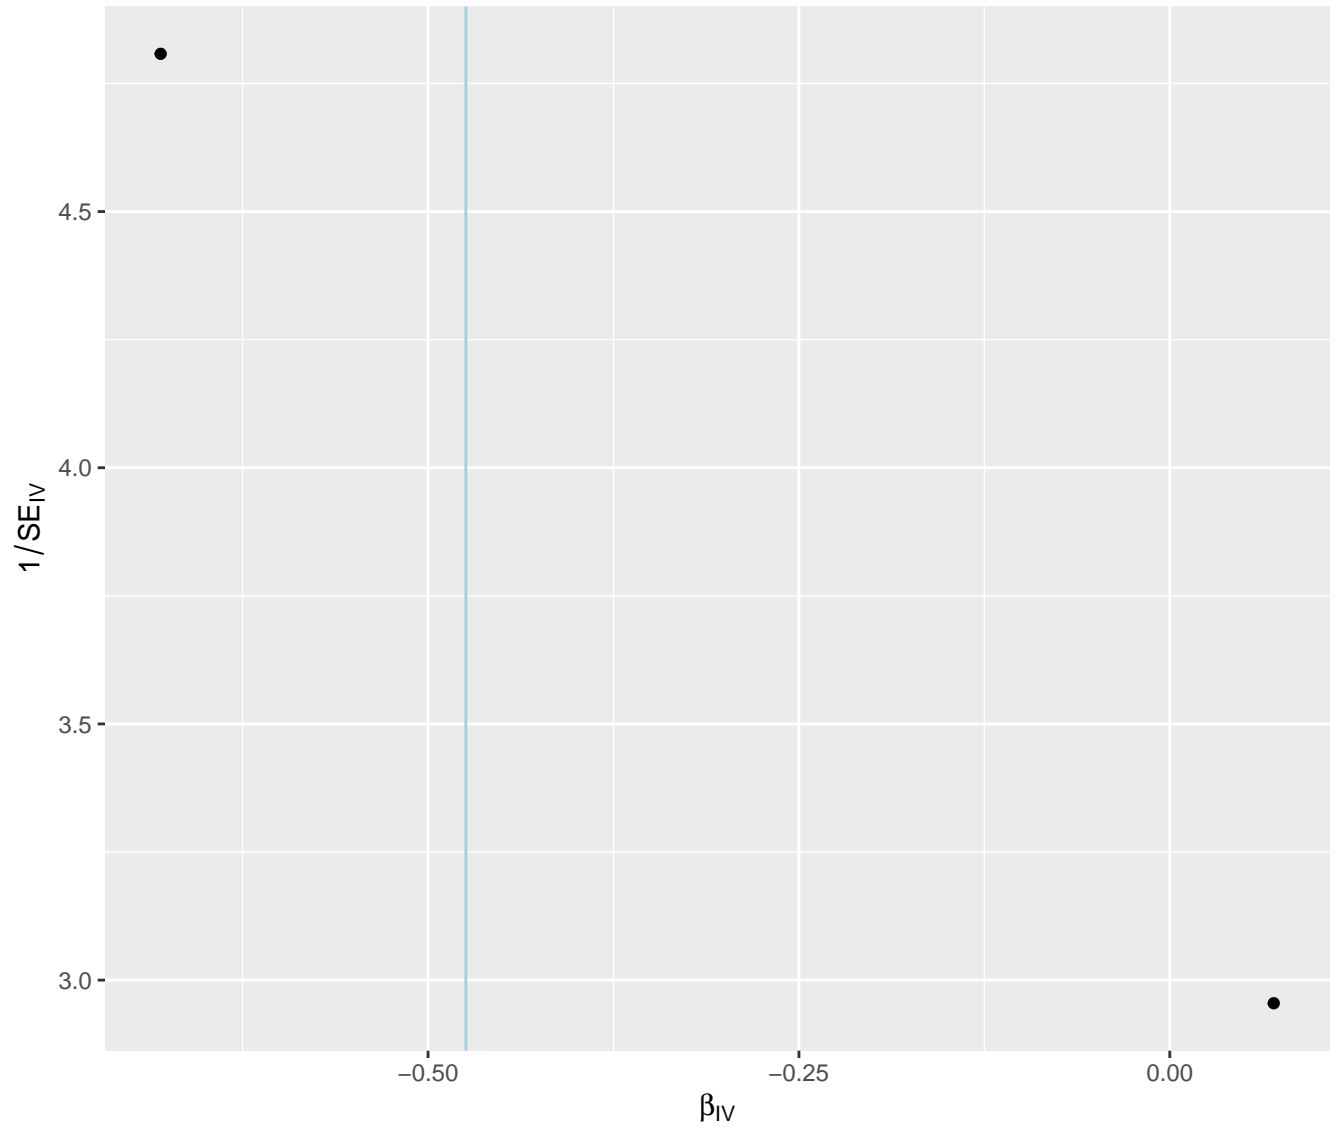

### MR Method

- Inverse variance weighted
- MR Egger

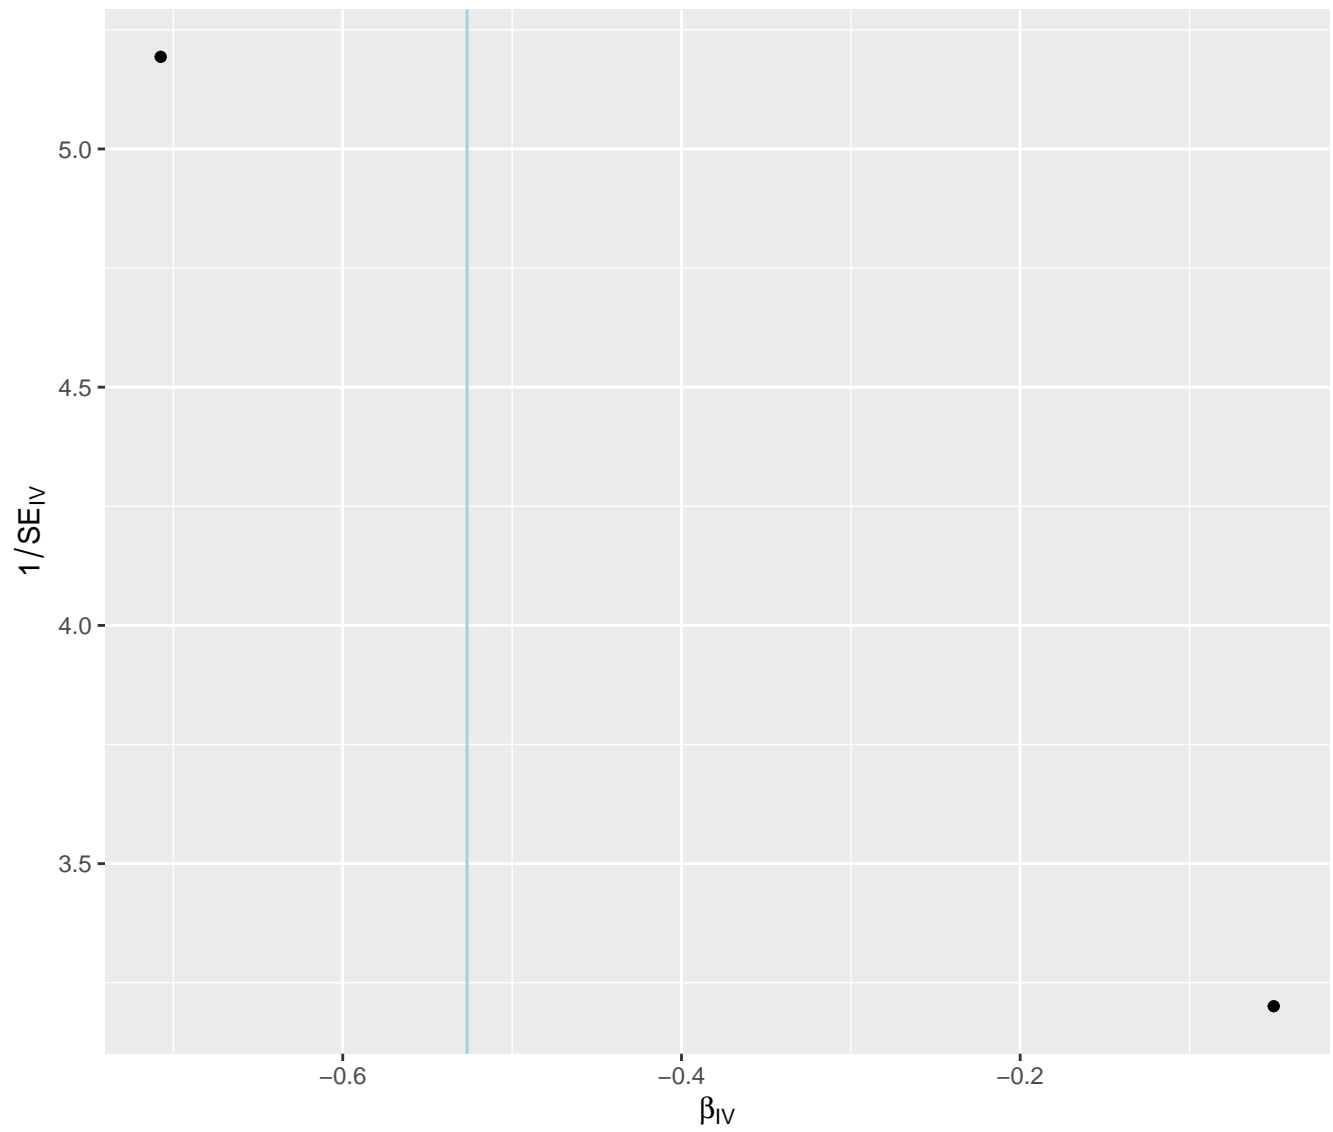



### MR Method

- Inverse variance weighted
- MR Egger

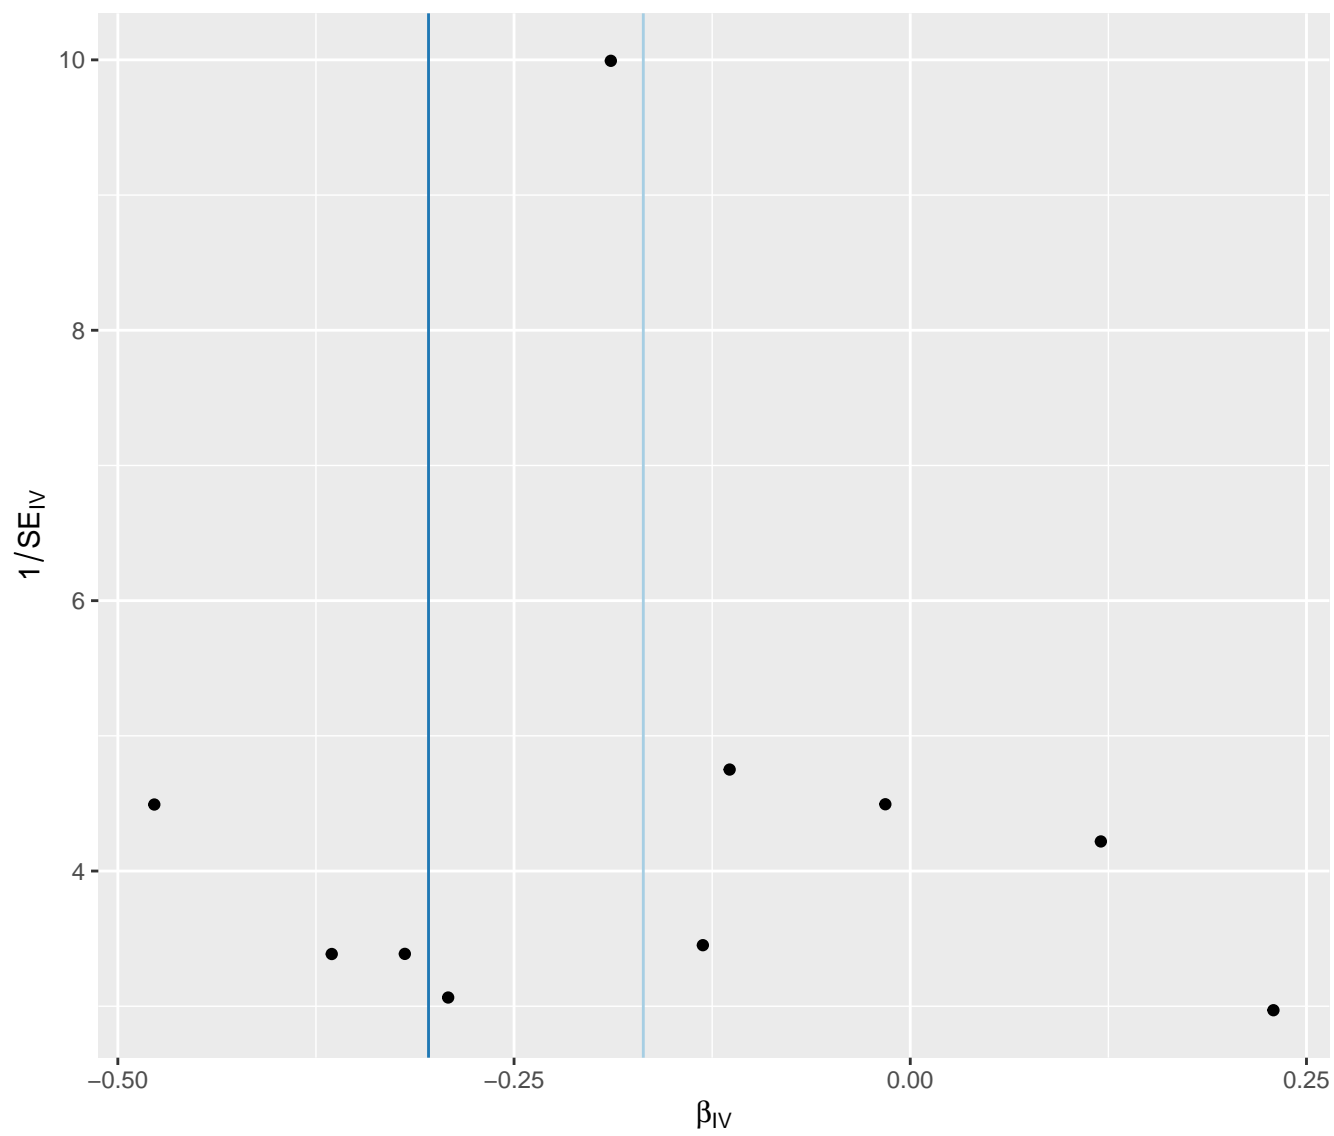

### MR Method

- Inverse variance weighted
- MR Egger

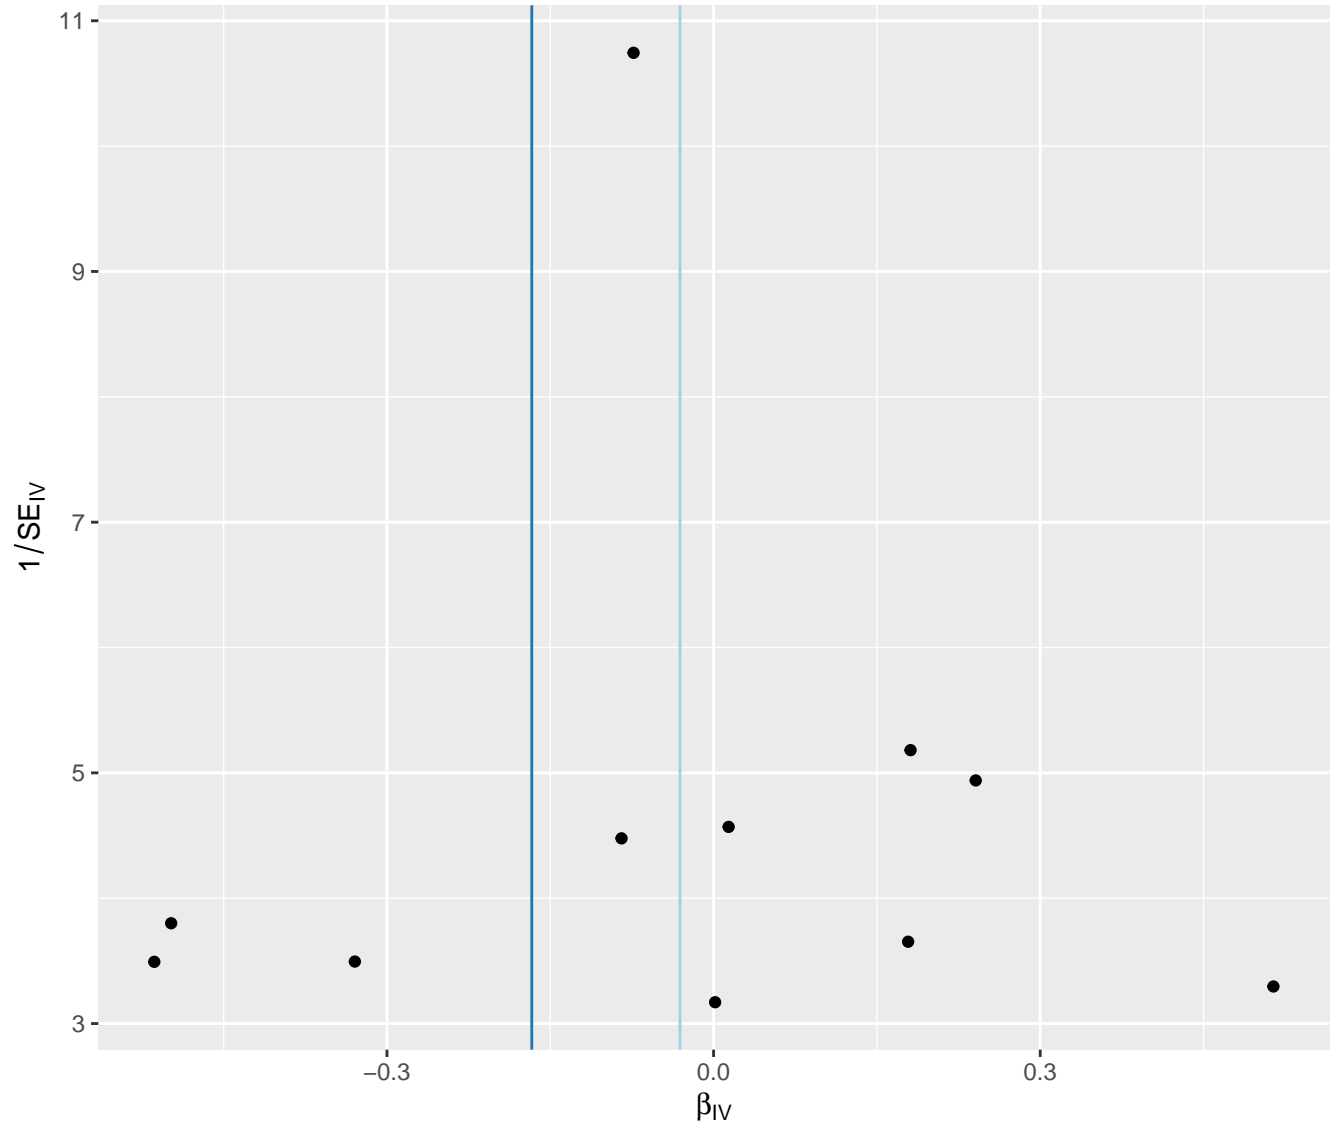

### MR Method

- Inverse variance weighted
- MR Egger

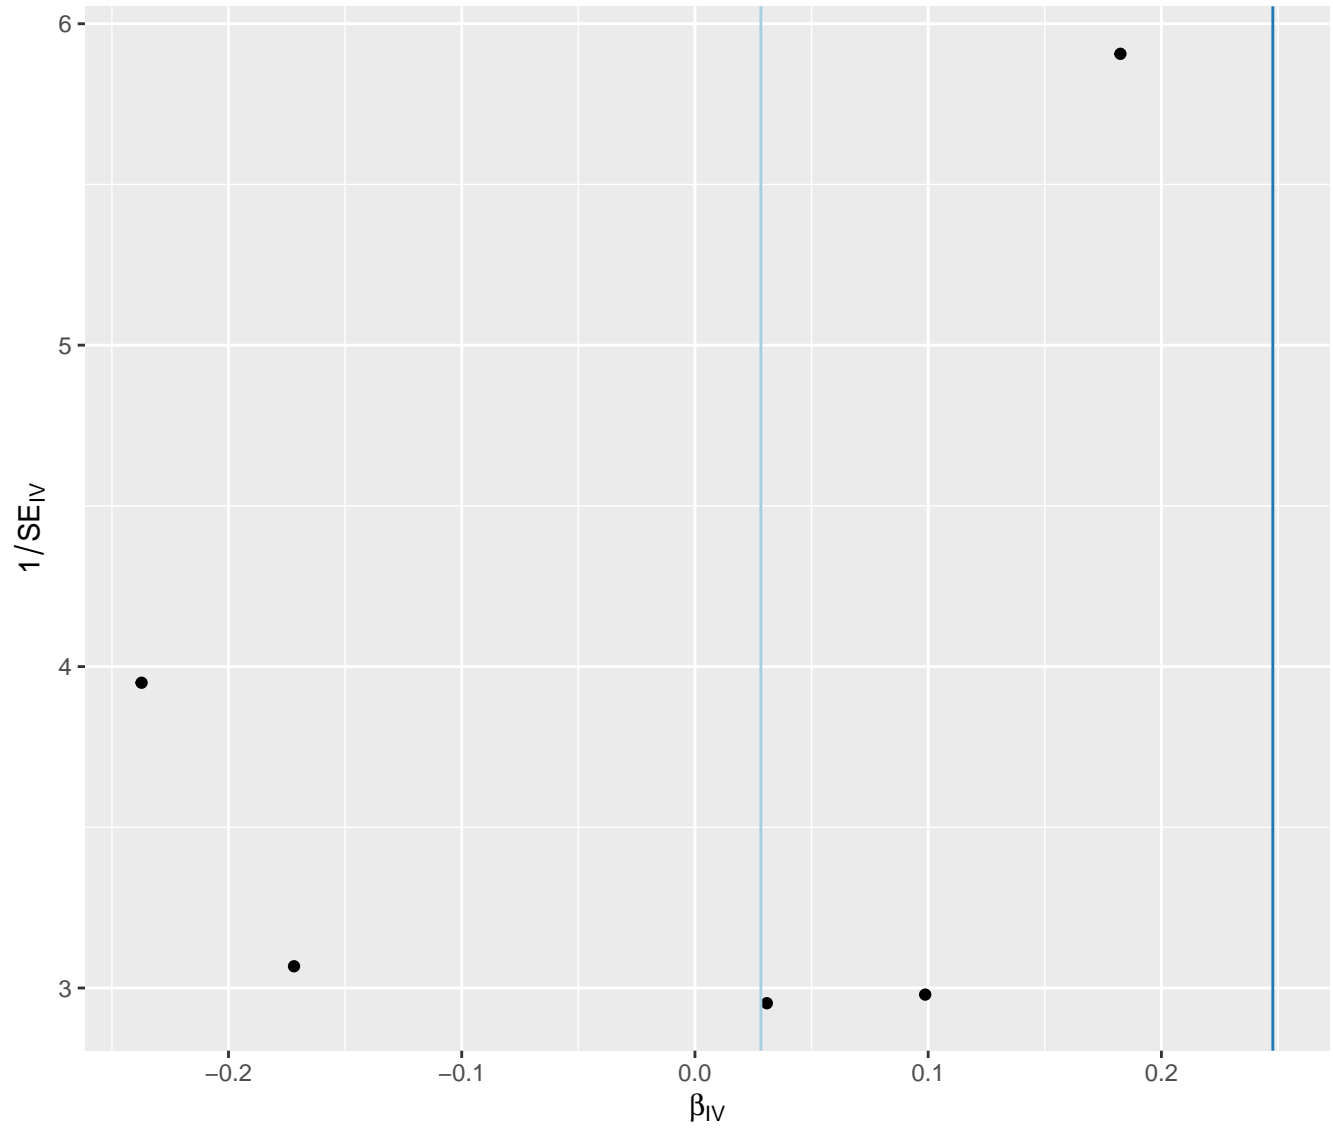

### MR Method

- Inverse variance weighted
- MR Egger

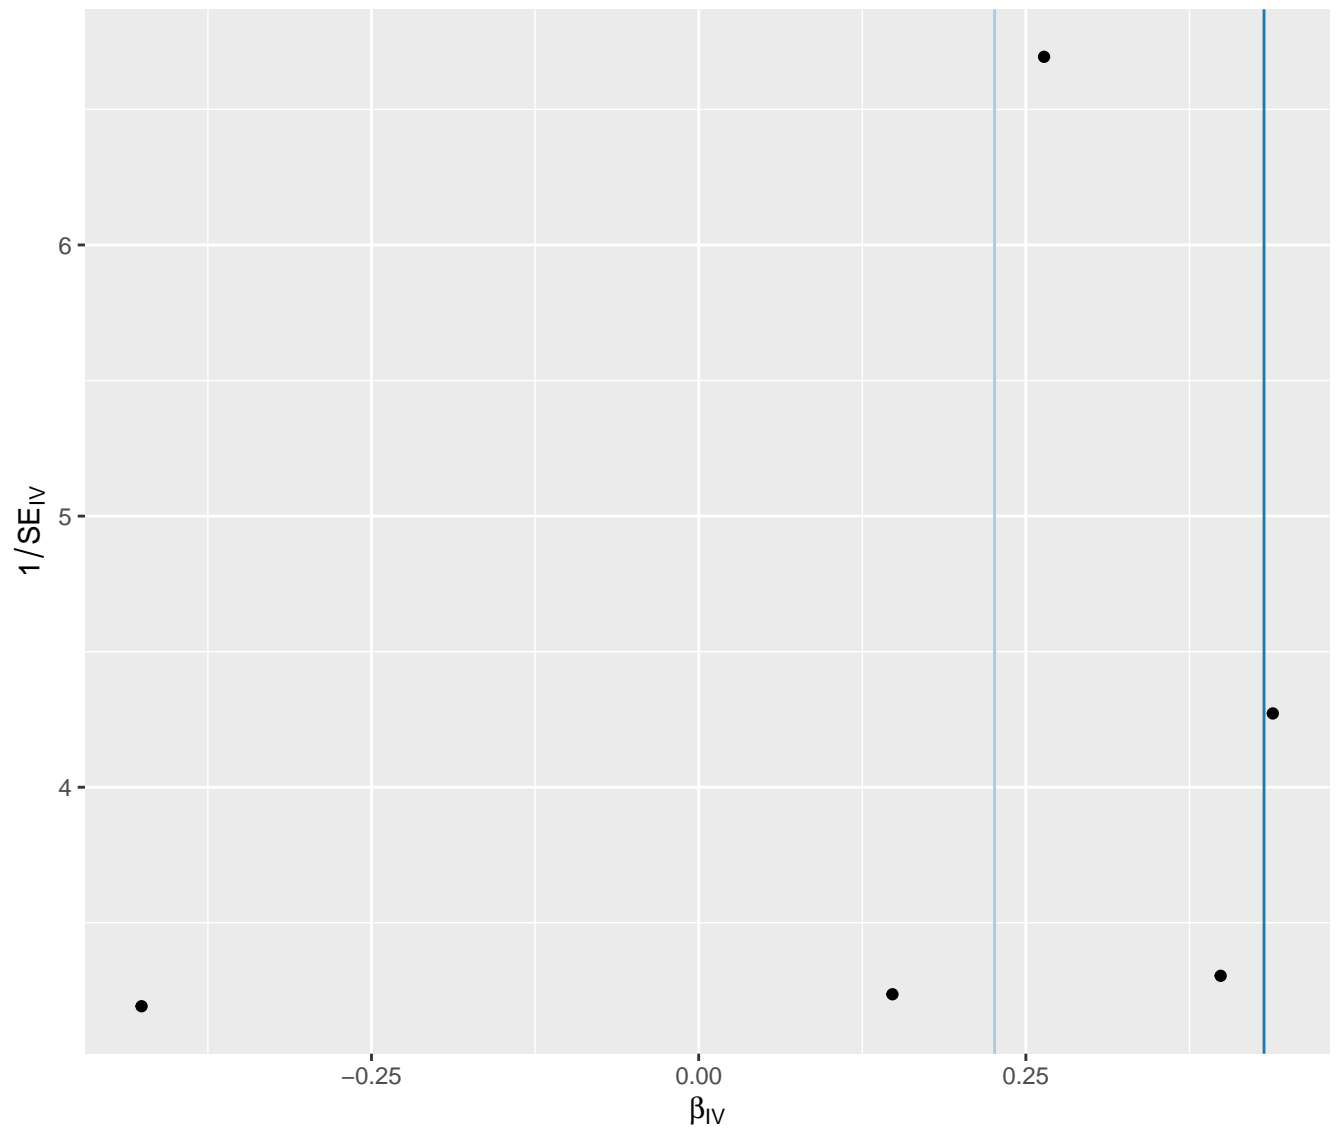

### MR Method

- Inverse variance weighted
- MR Egger

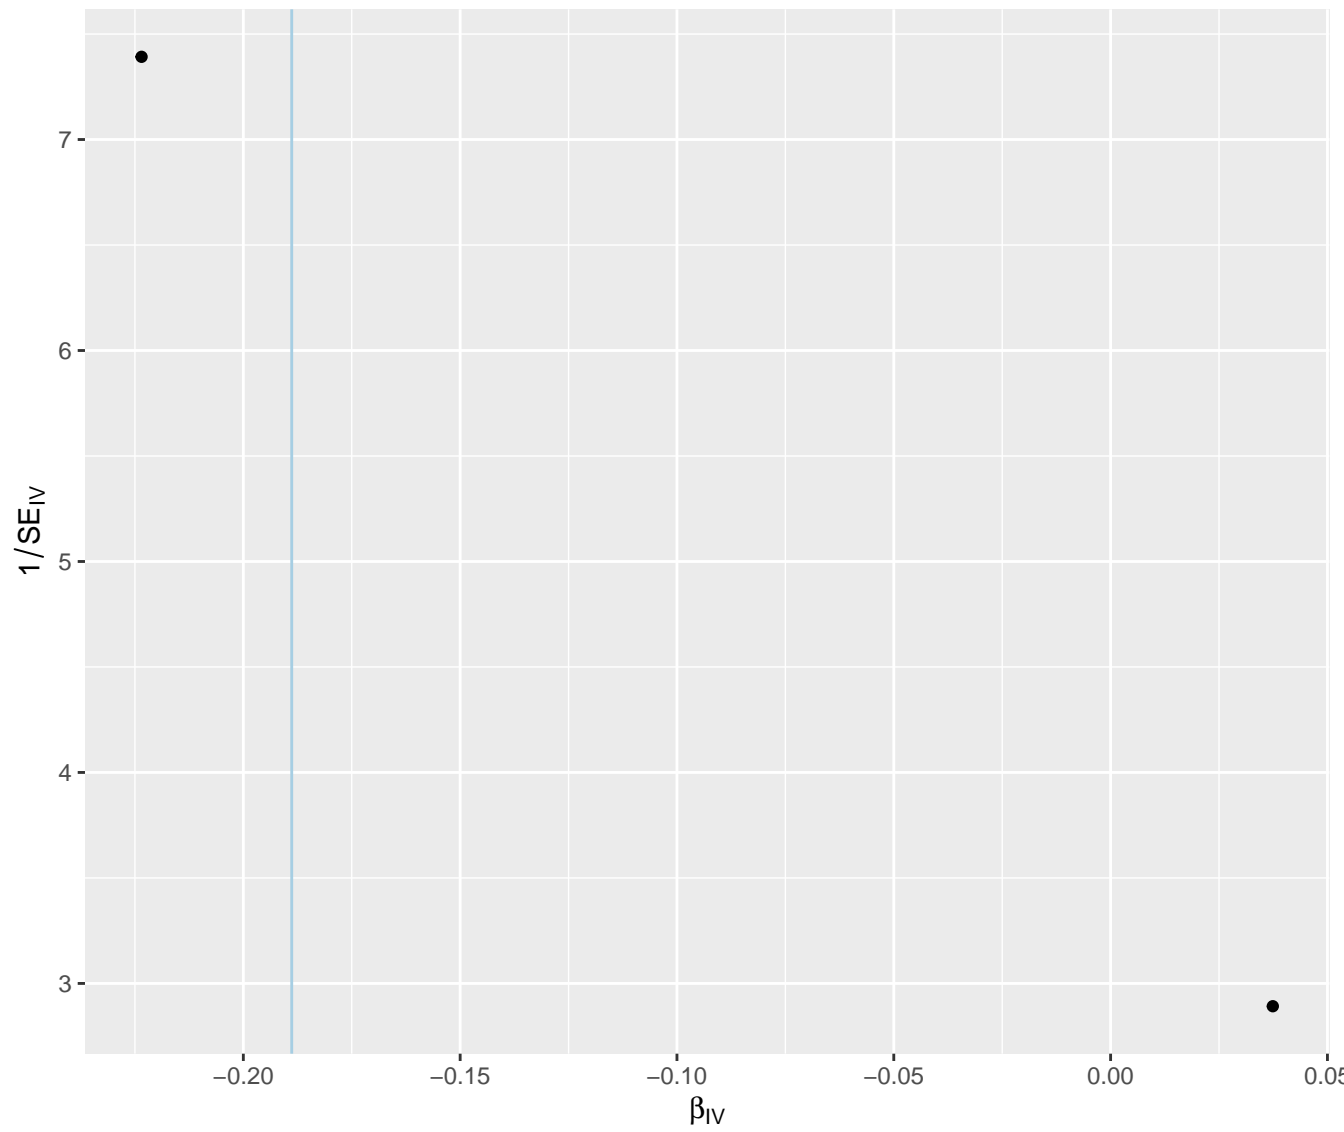

### MR Method

- Inverse variance weighted
- MR Egger

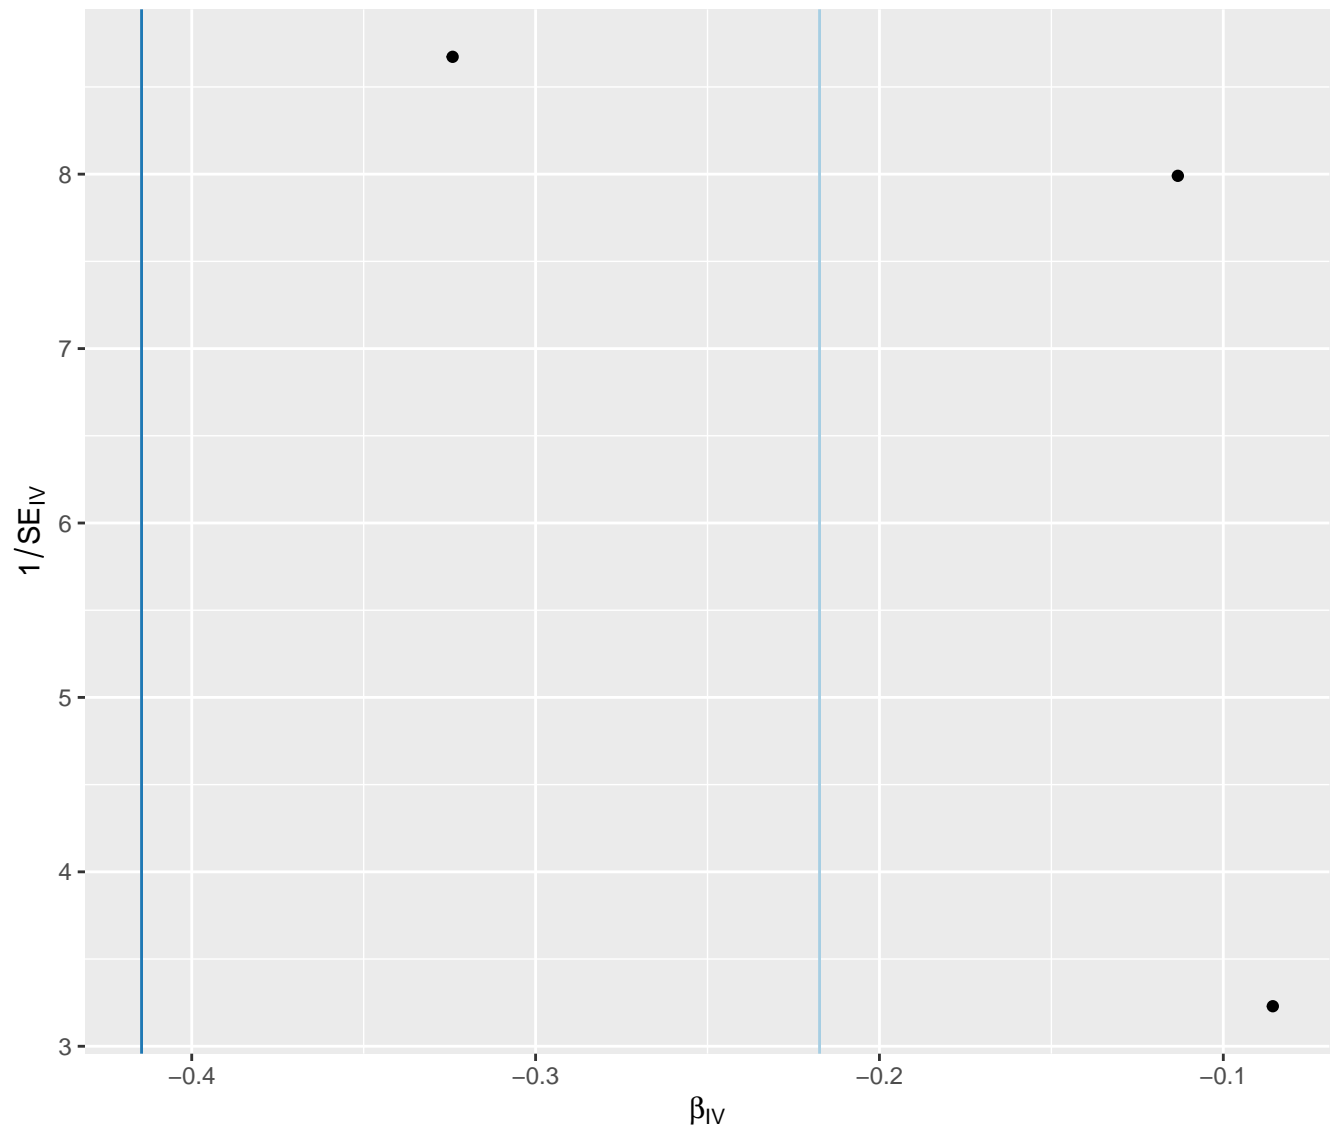

### MR Method

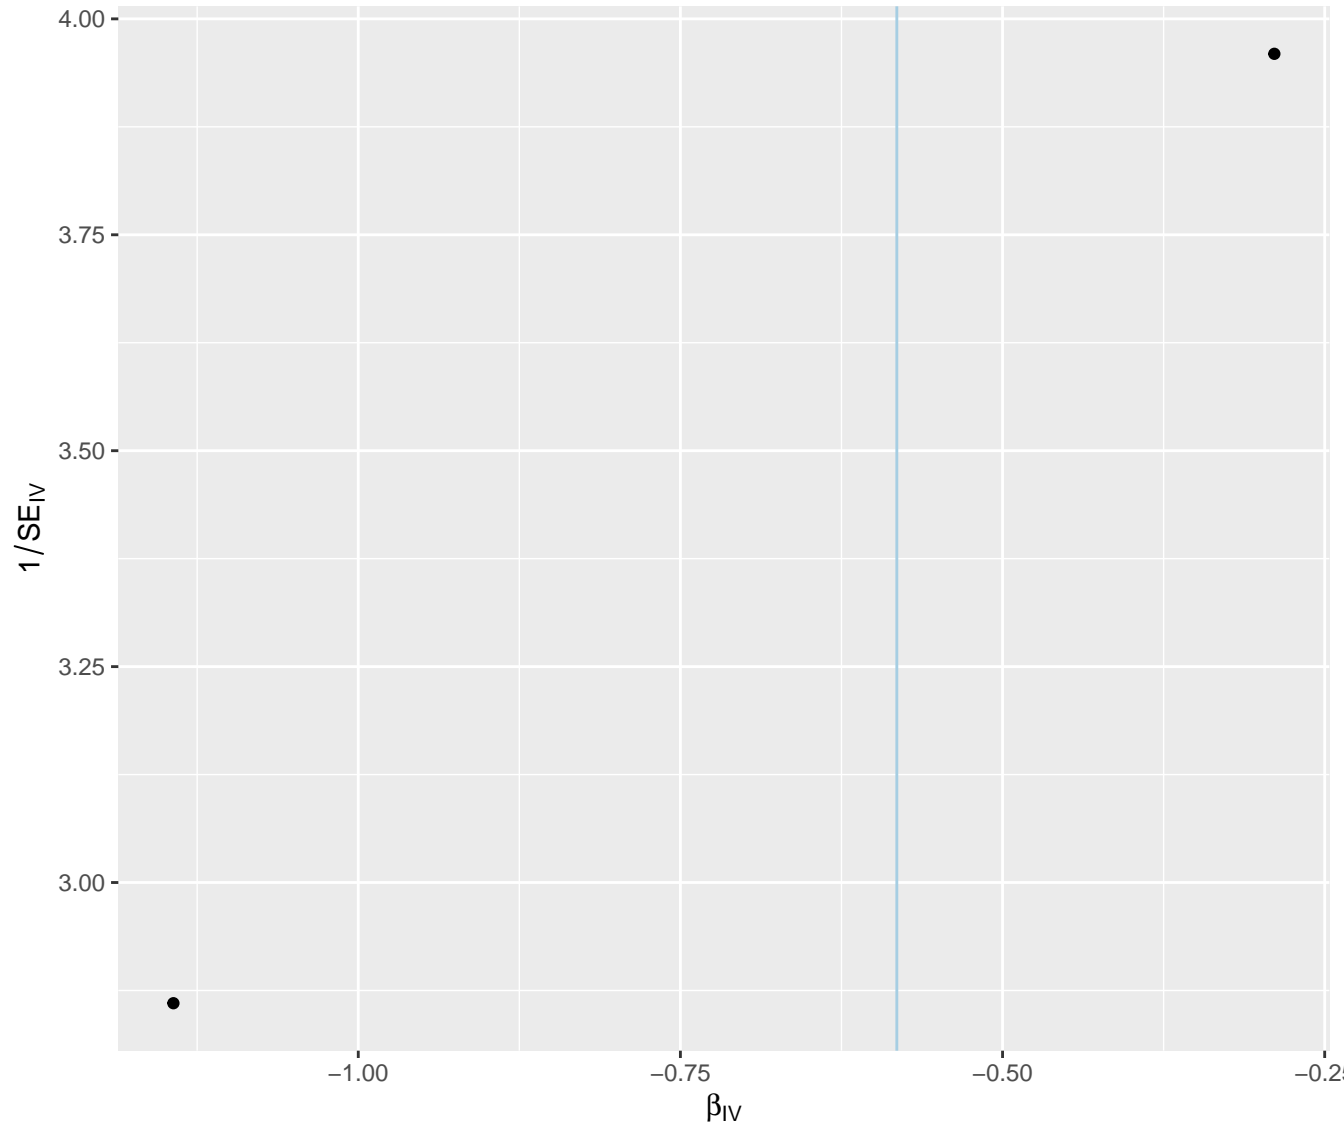

### MR Method

- Inverse variance weighted
- MR Egger

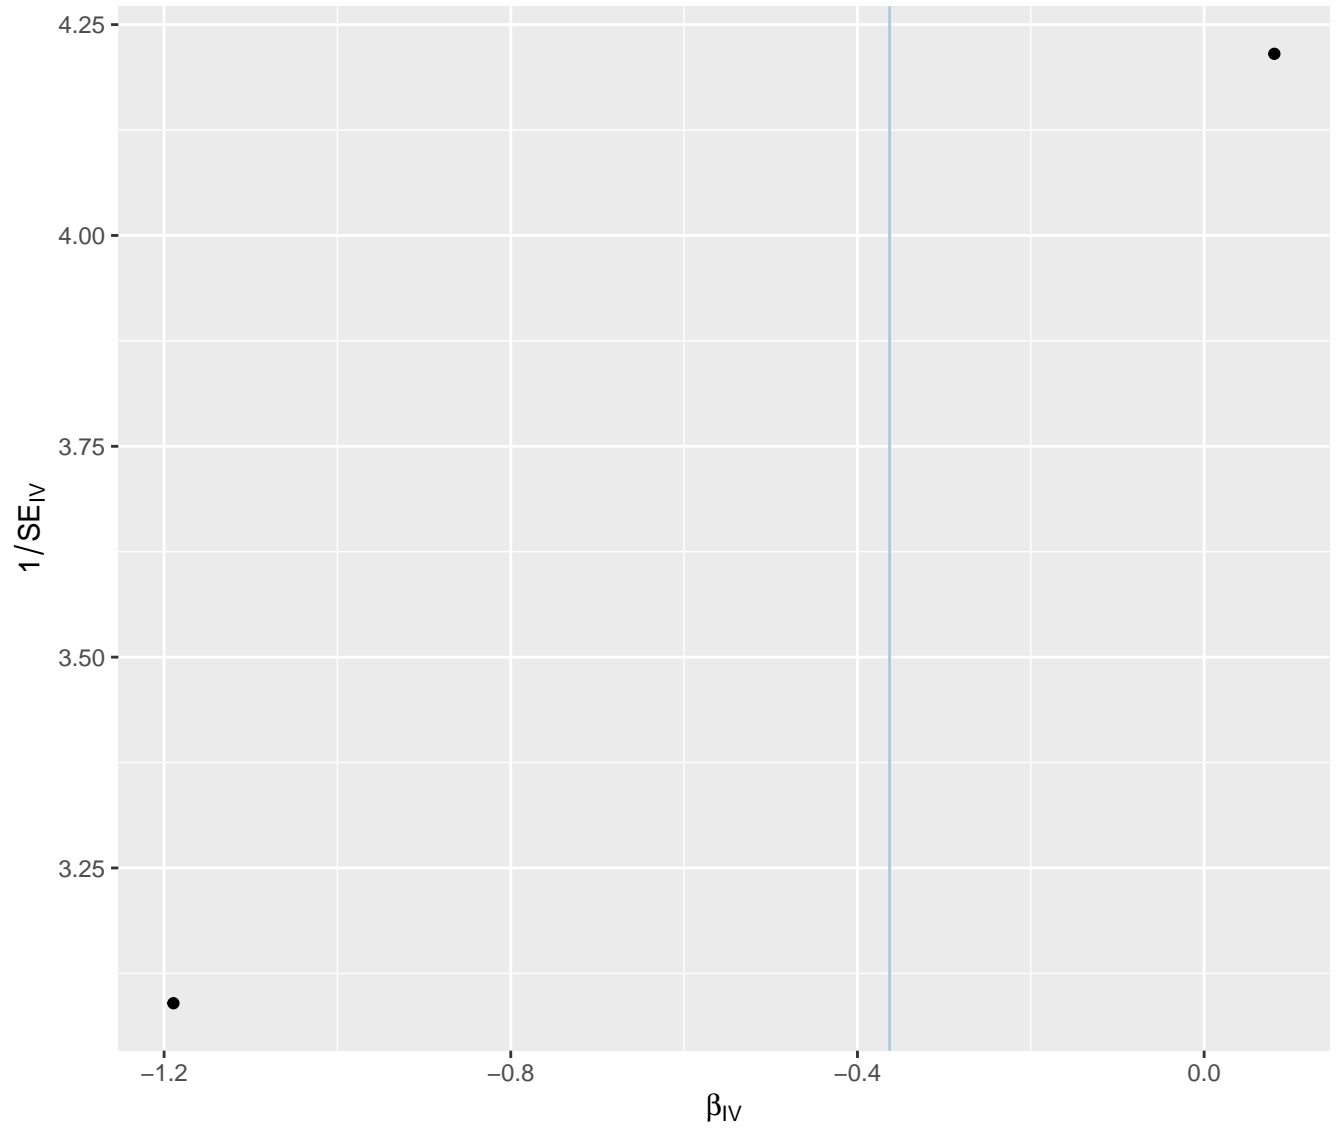



### MR Method

- Inverse variance weighted
- MR Egger

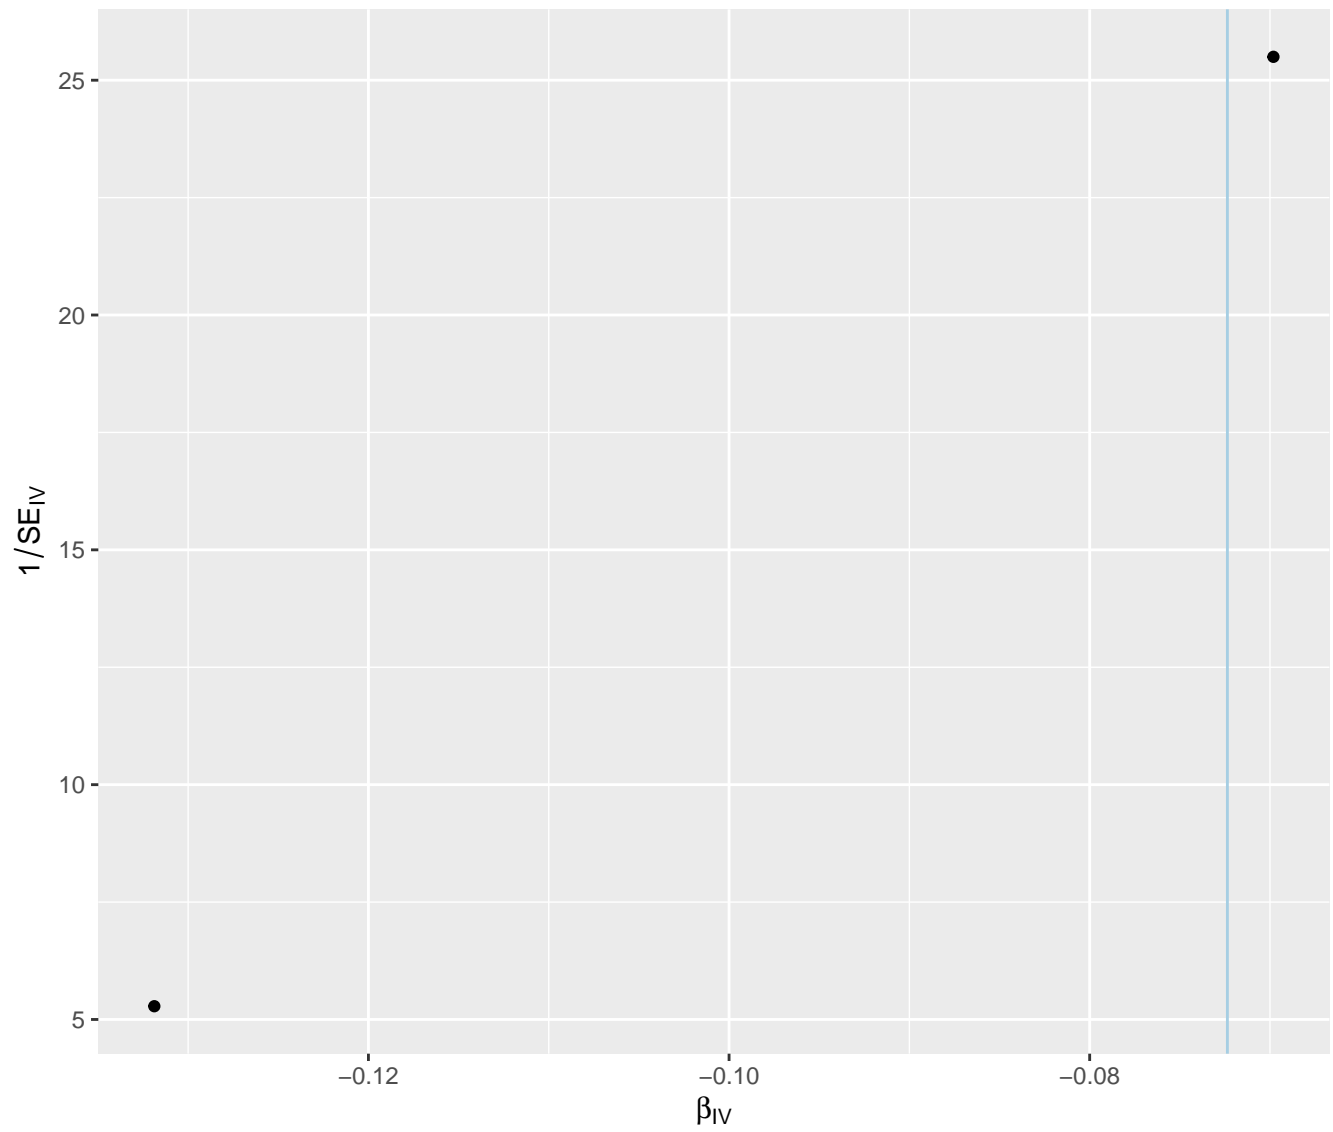

### MR Method

- Inverse variance weighted
- MR Egger

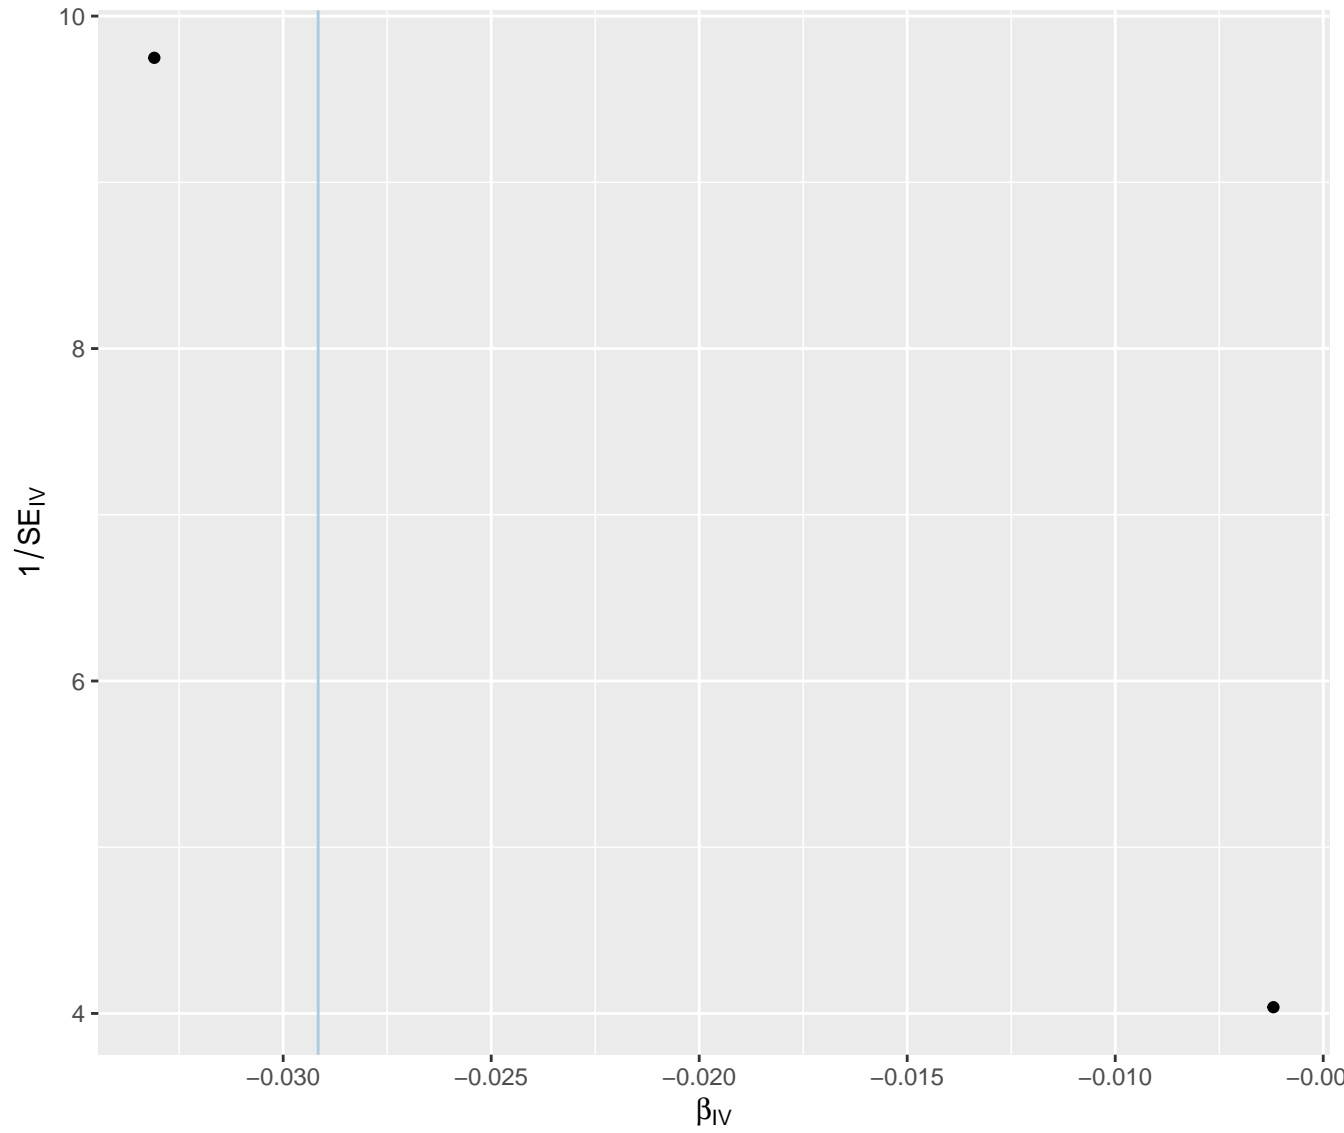

### MR Method

- Inverse variance weighted
- MR Egger

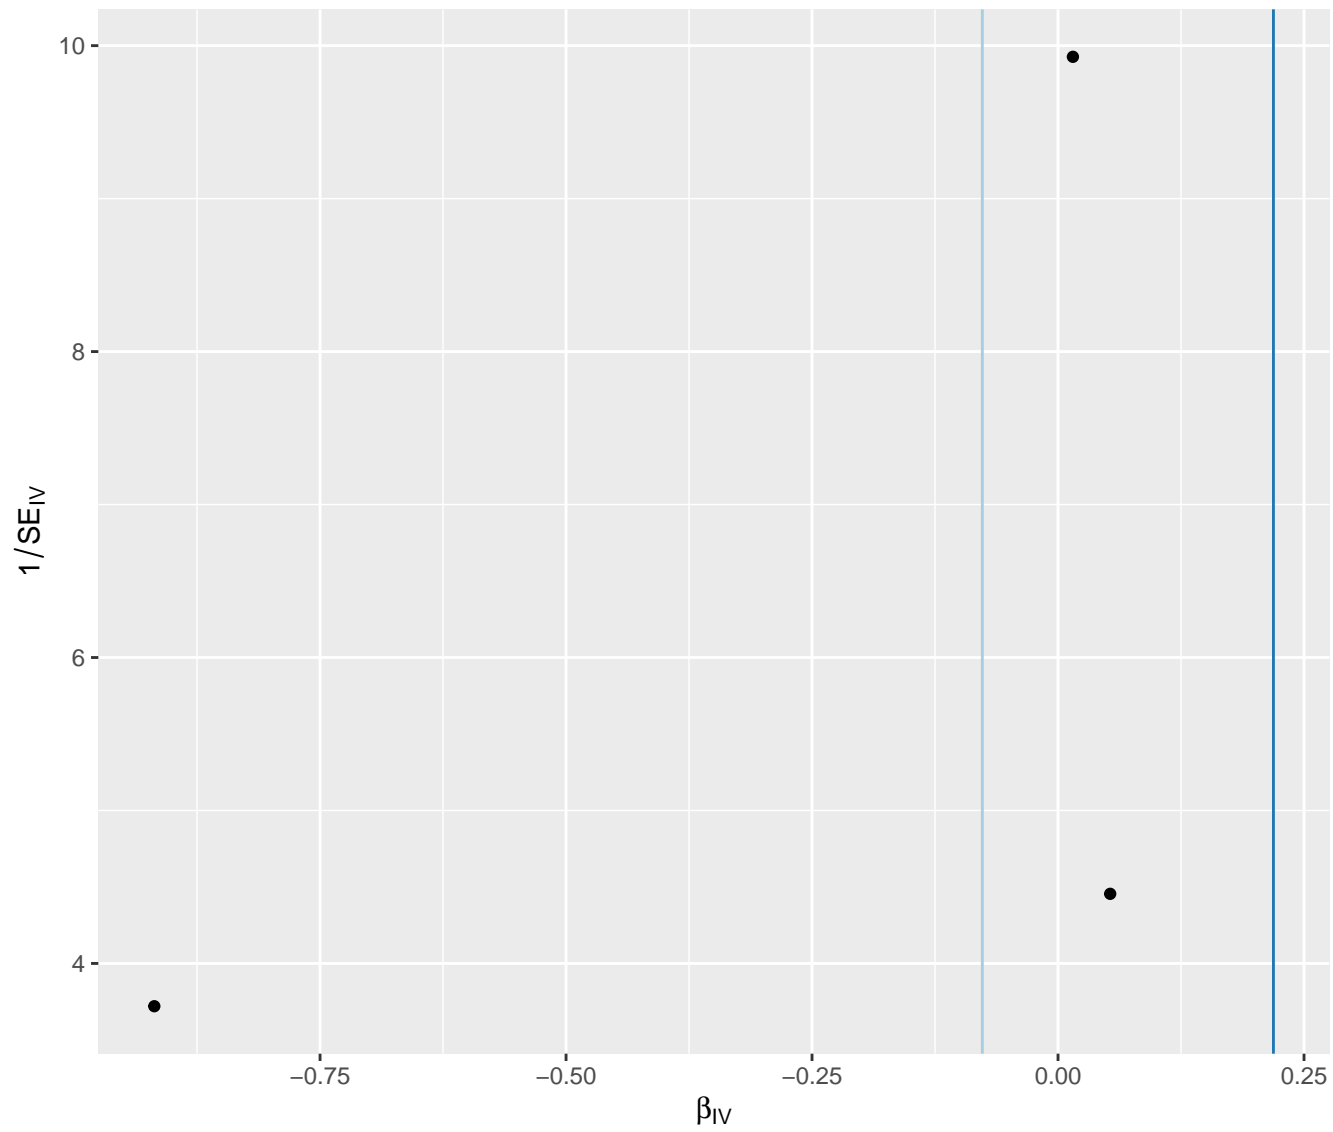

### MR Method

- Inverse variance weighted
- MR Egger

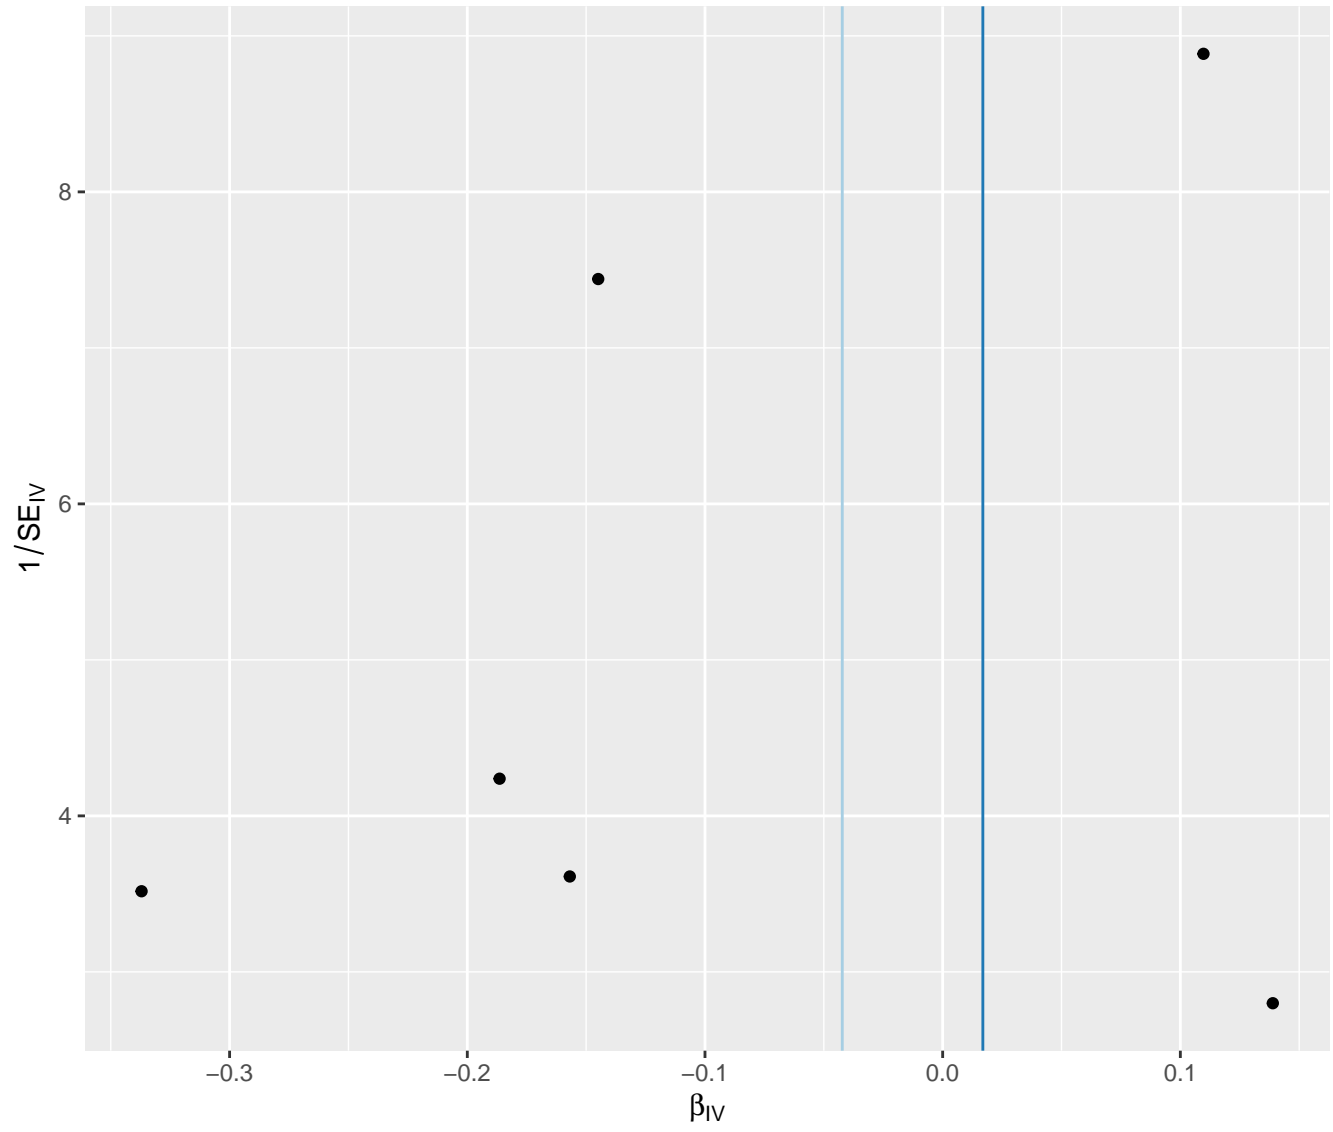

### MR Method

- Inverse variance weighted
- MR Egger

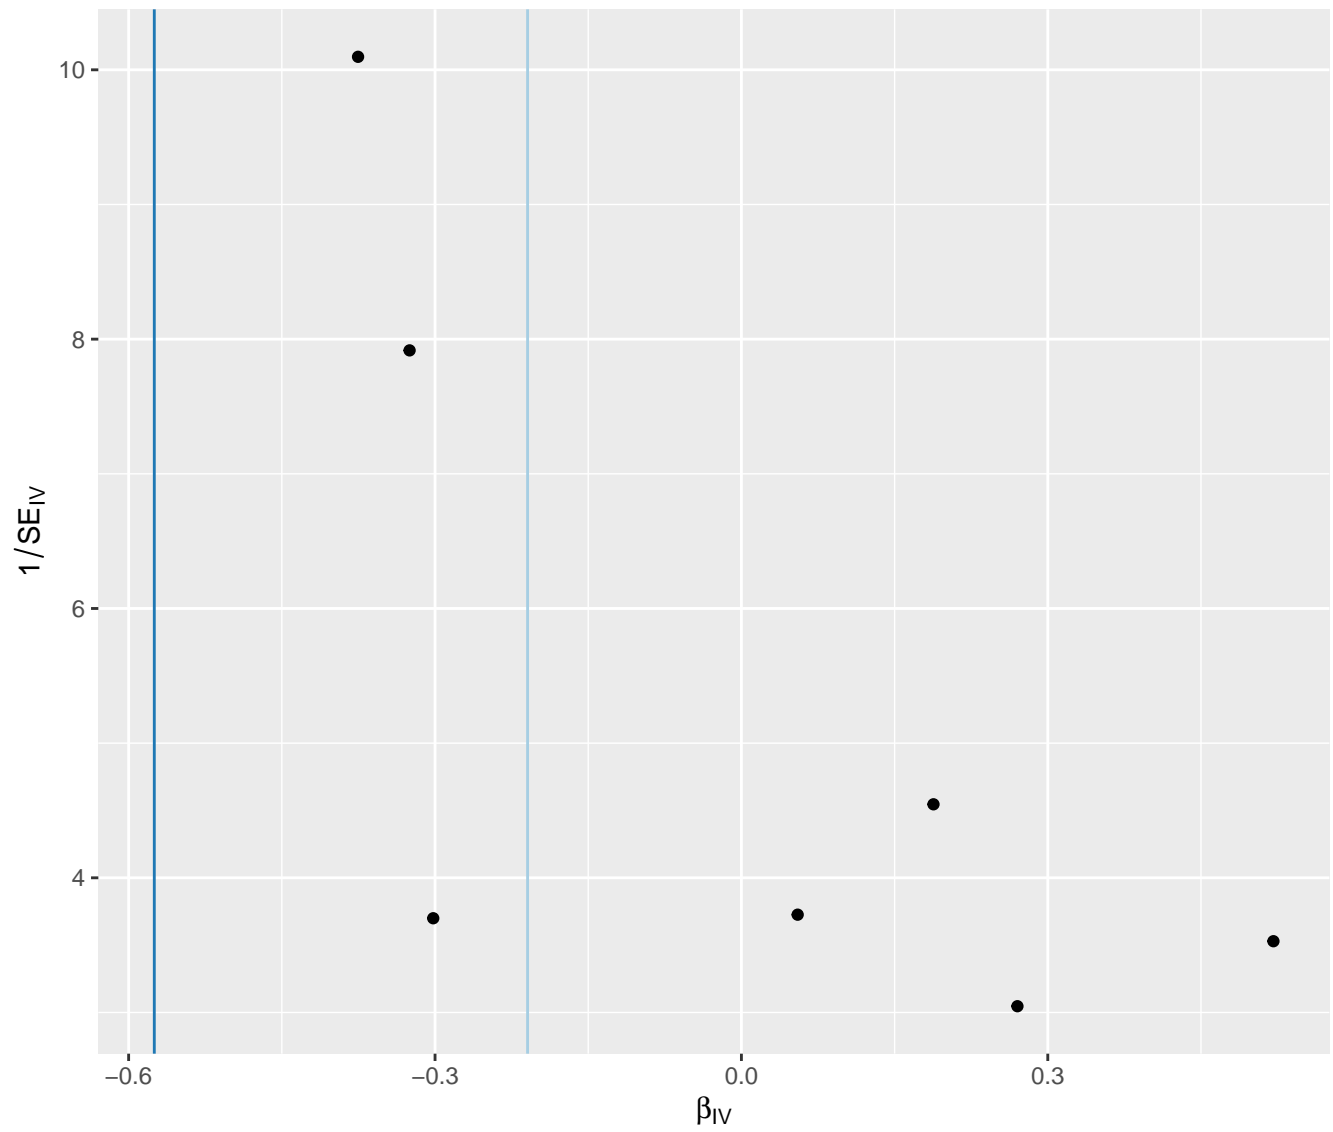

### MR Method

- Inverse variance weighted
- MR Egger

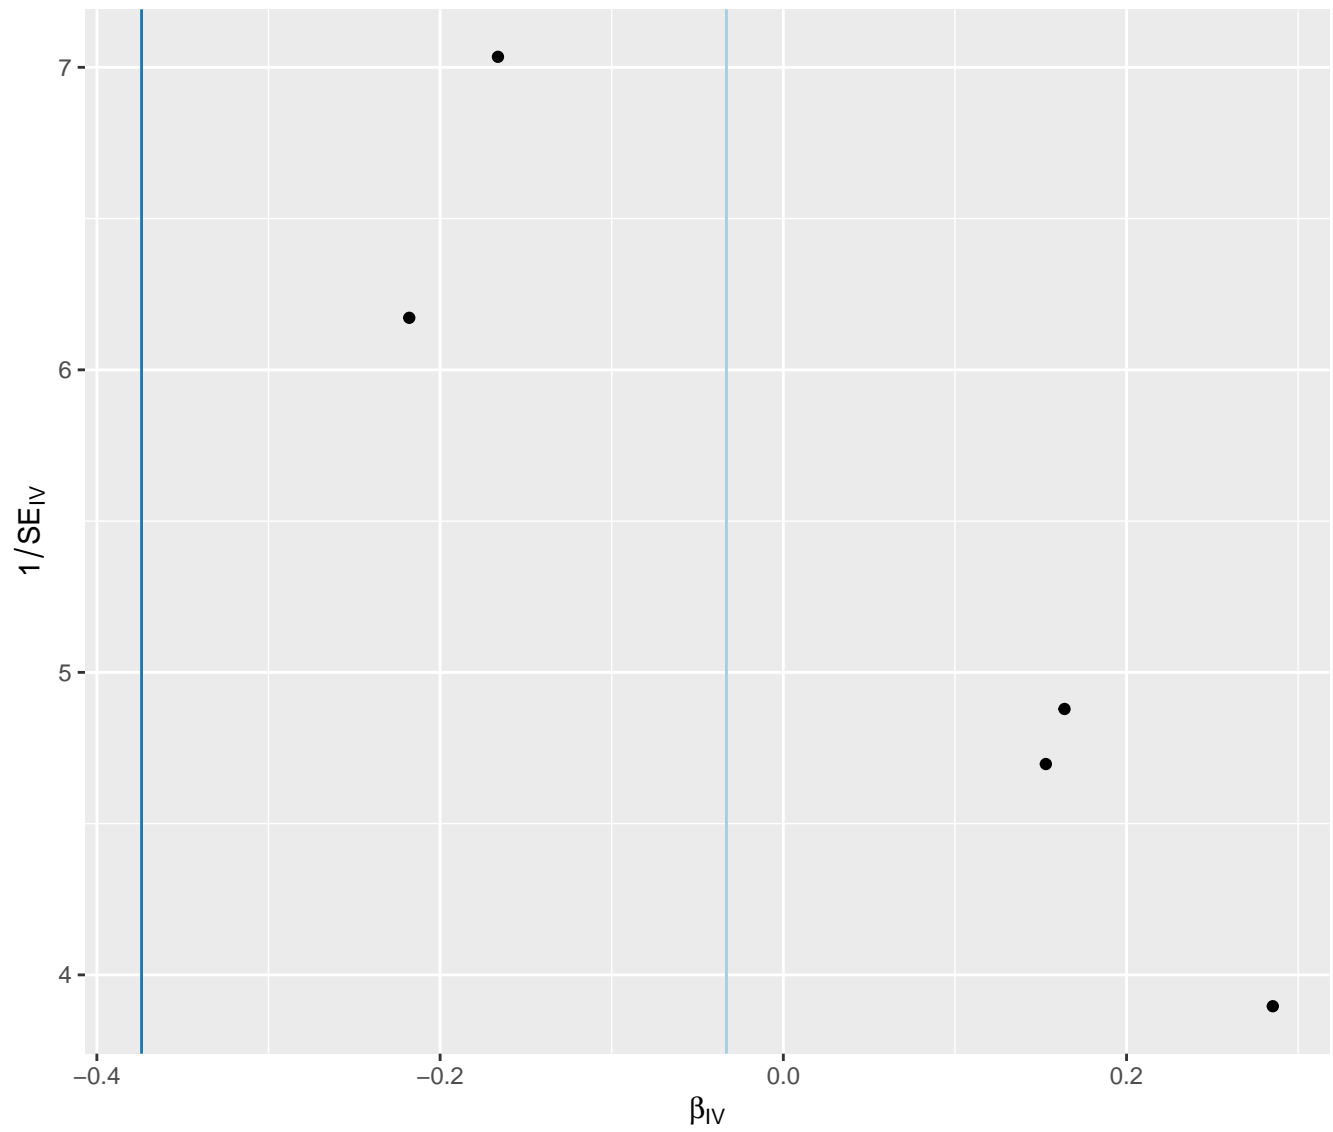

### MR Method

- Inverse variance weighted
- MR Egger

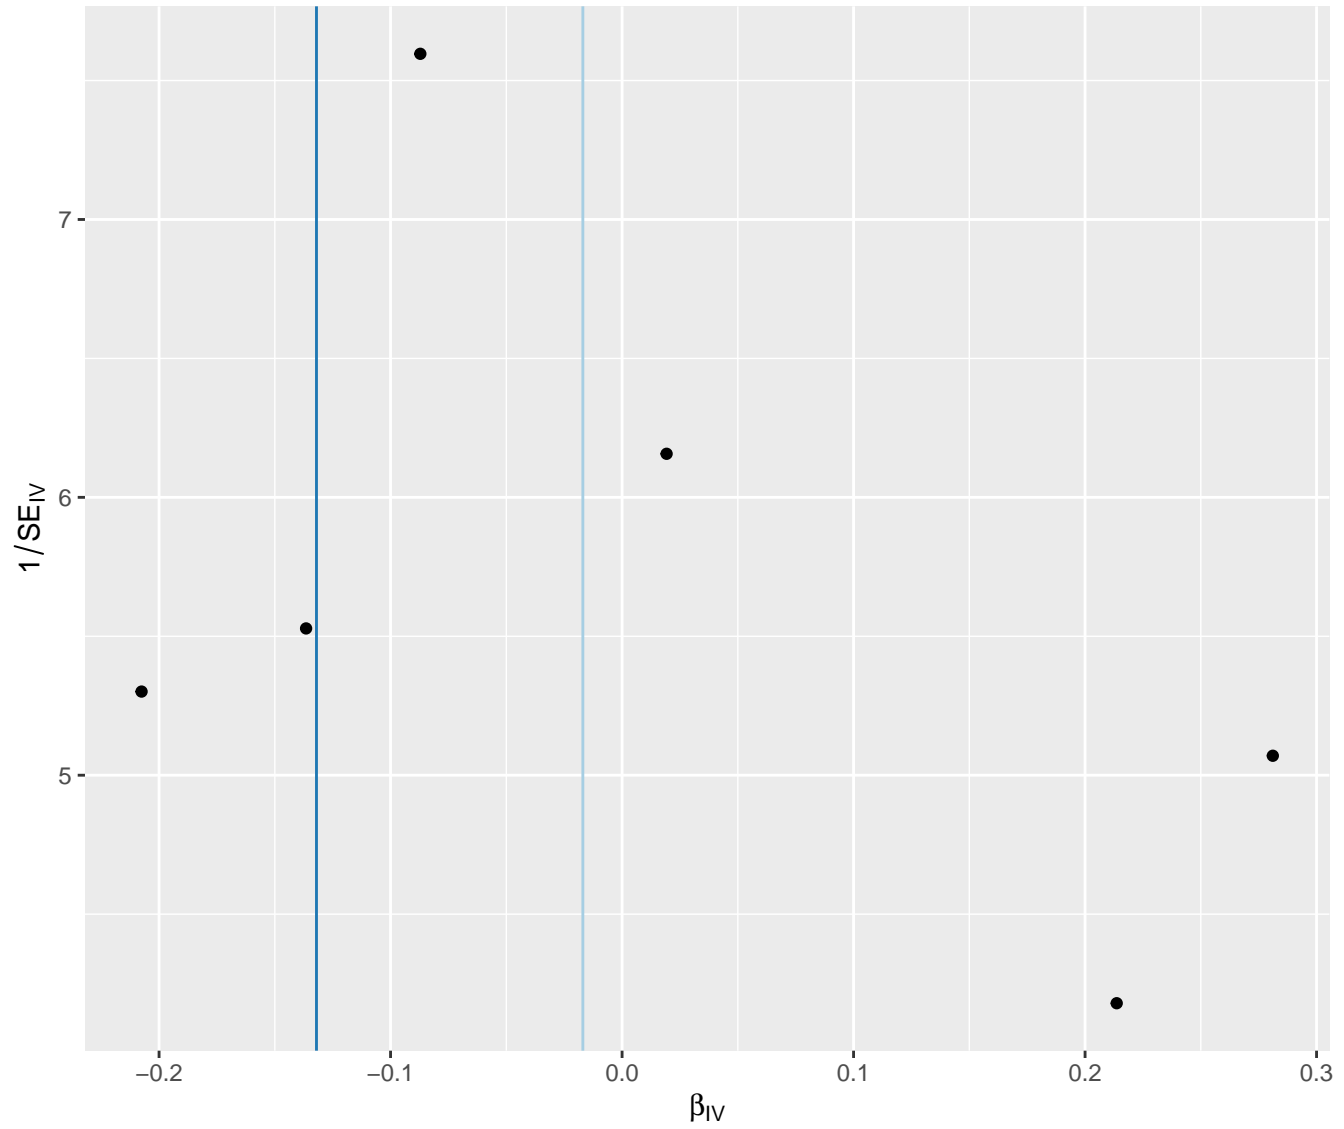

### MR Method

- Inverse variance weighted
- MR Egger

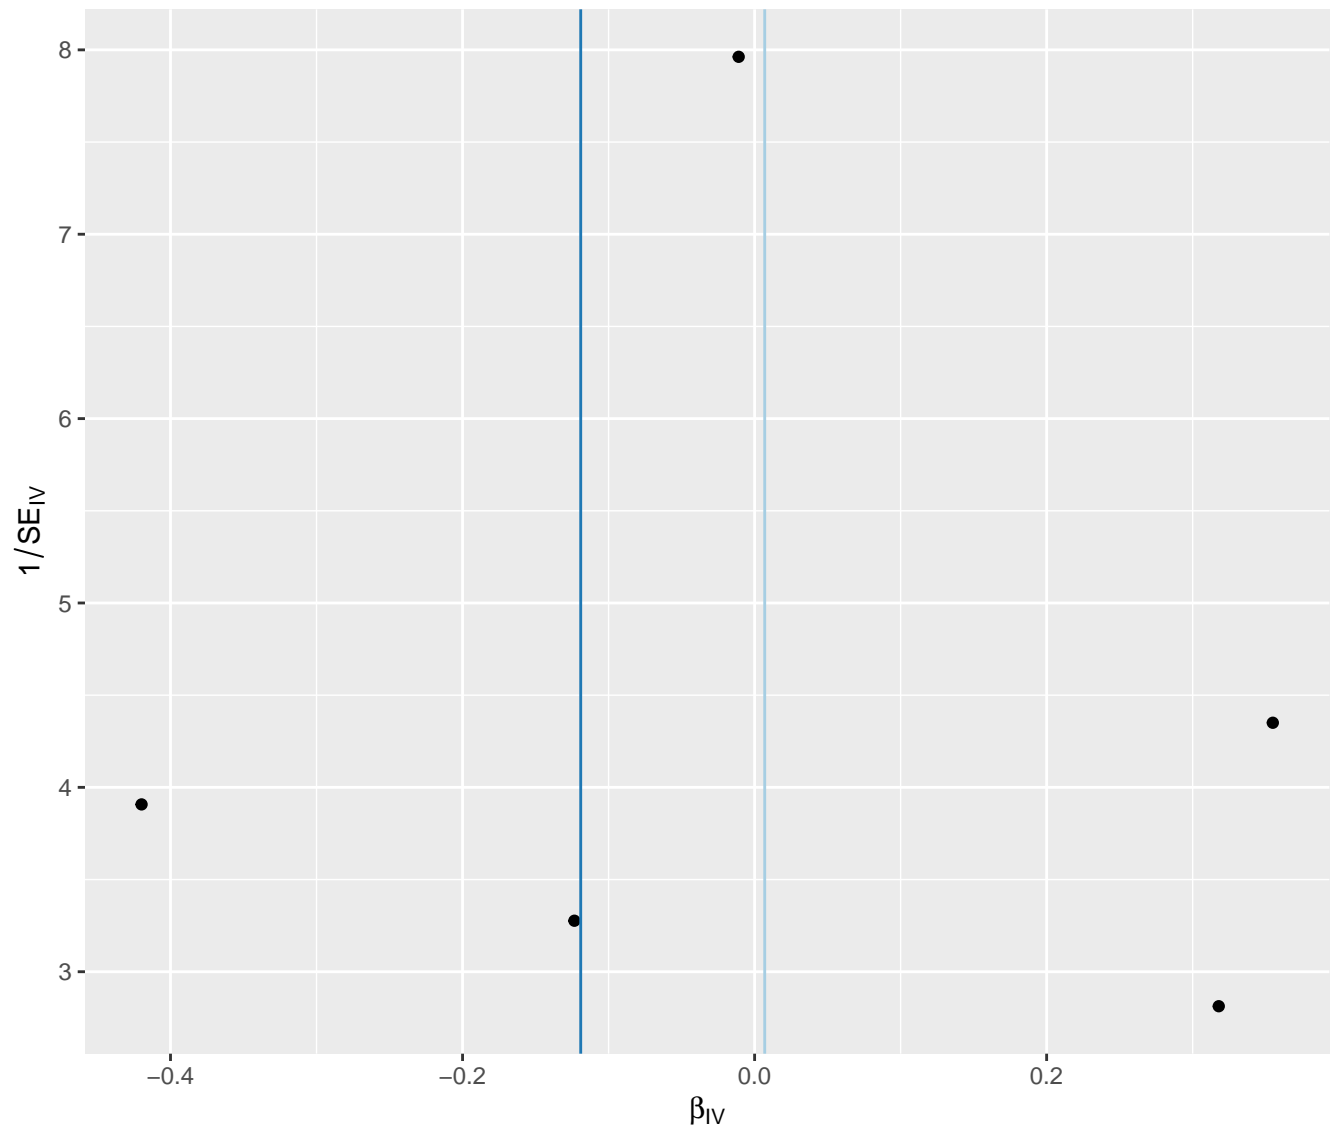



### MR Method

- Inverse variance weighted
- MR Egger

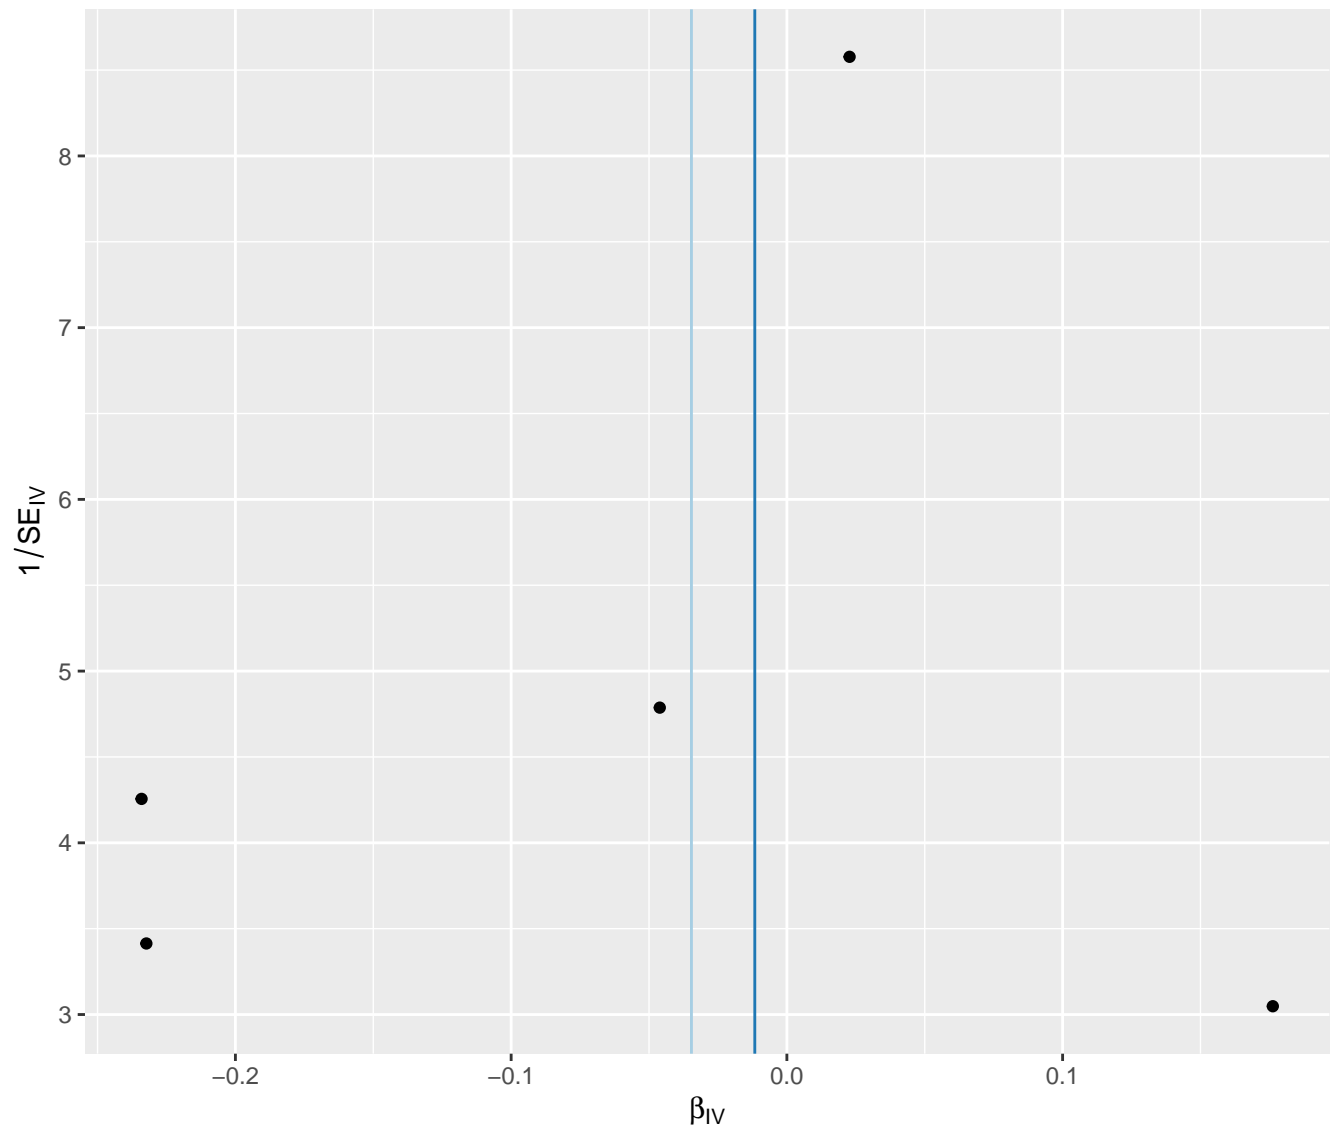

### MR Method

- Inverse variance weighted
- MR Egger

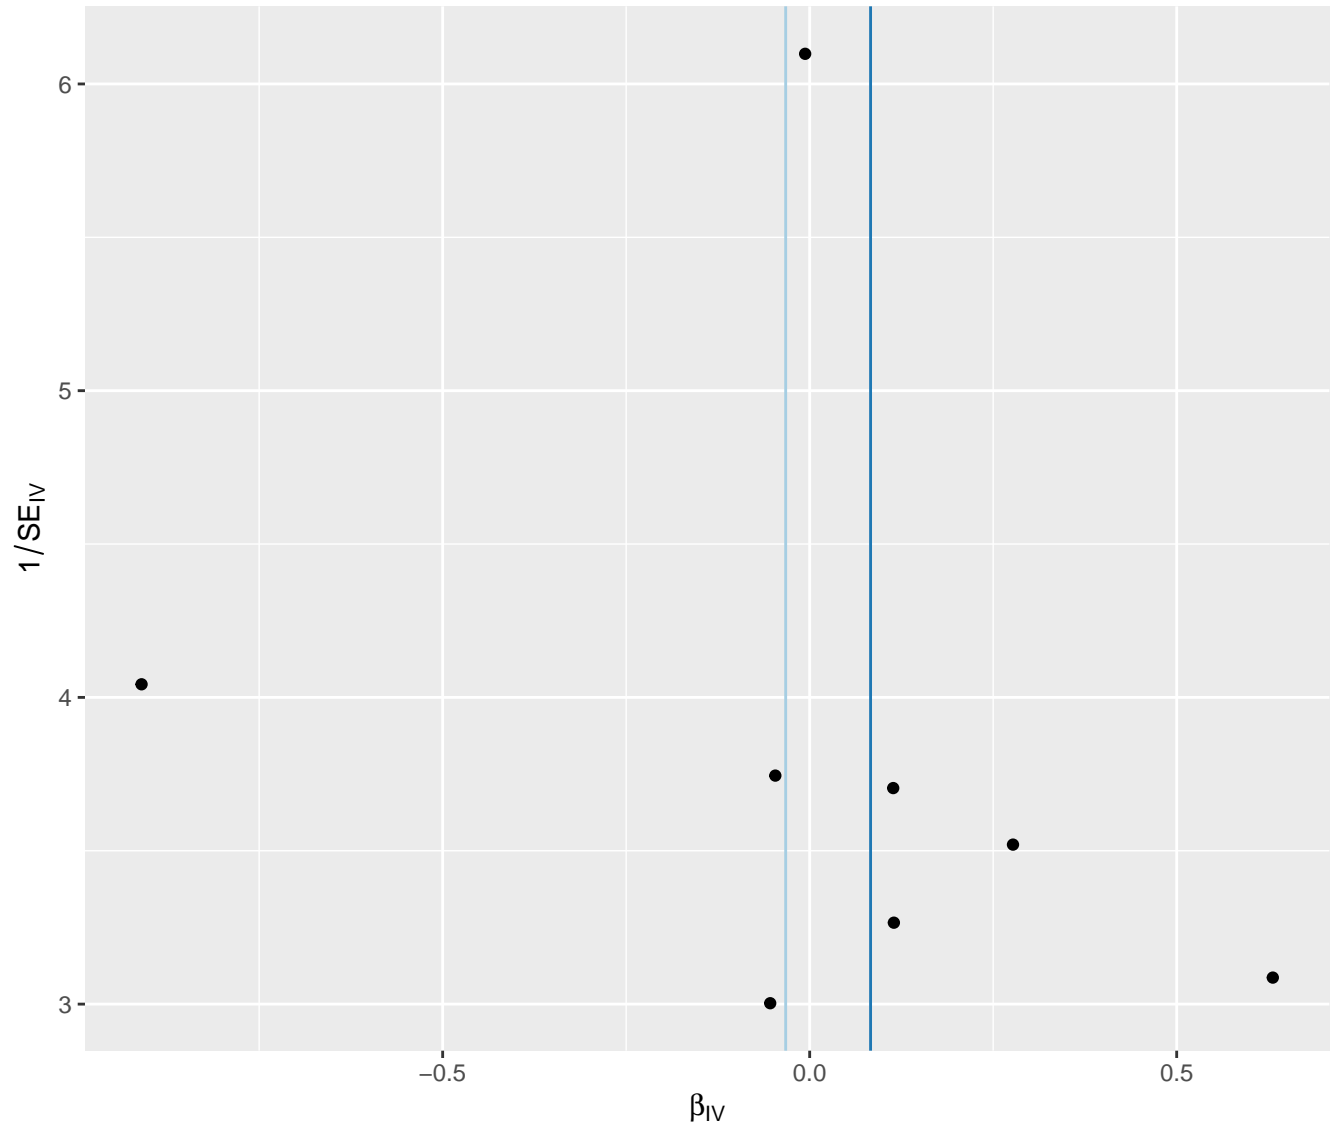

### MR Method

- Inverse variance weighted
- MR Egger

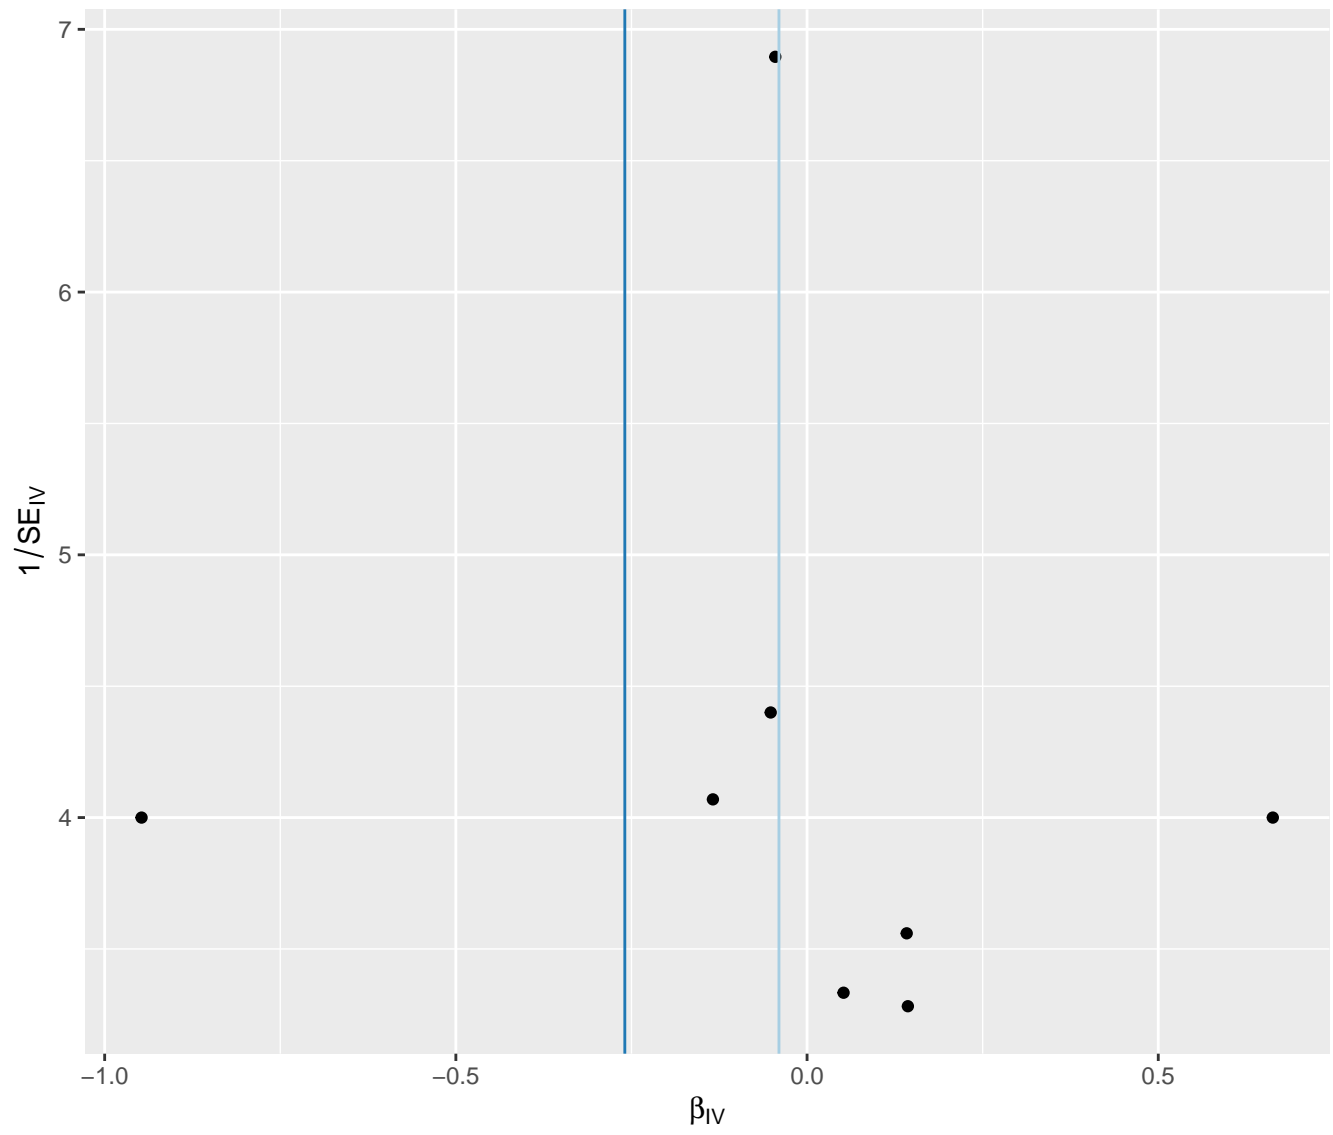

### MR Method

- Inverse variance weighted
- MR Egger

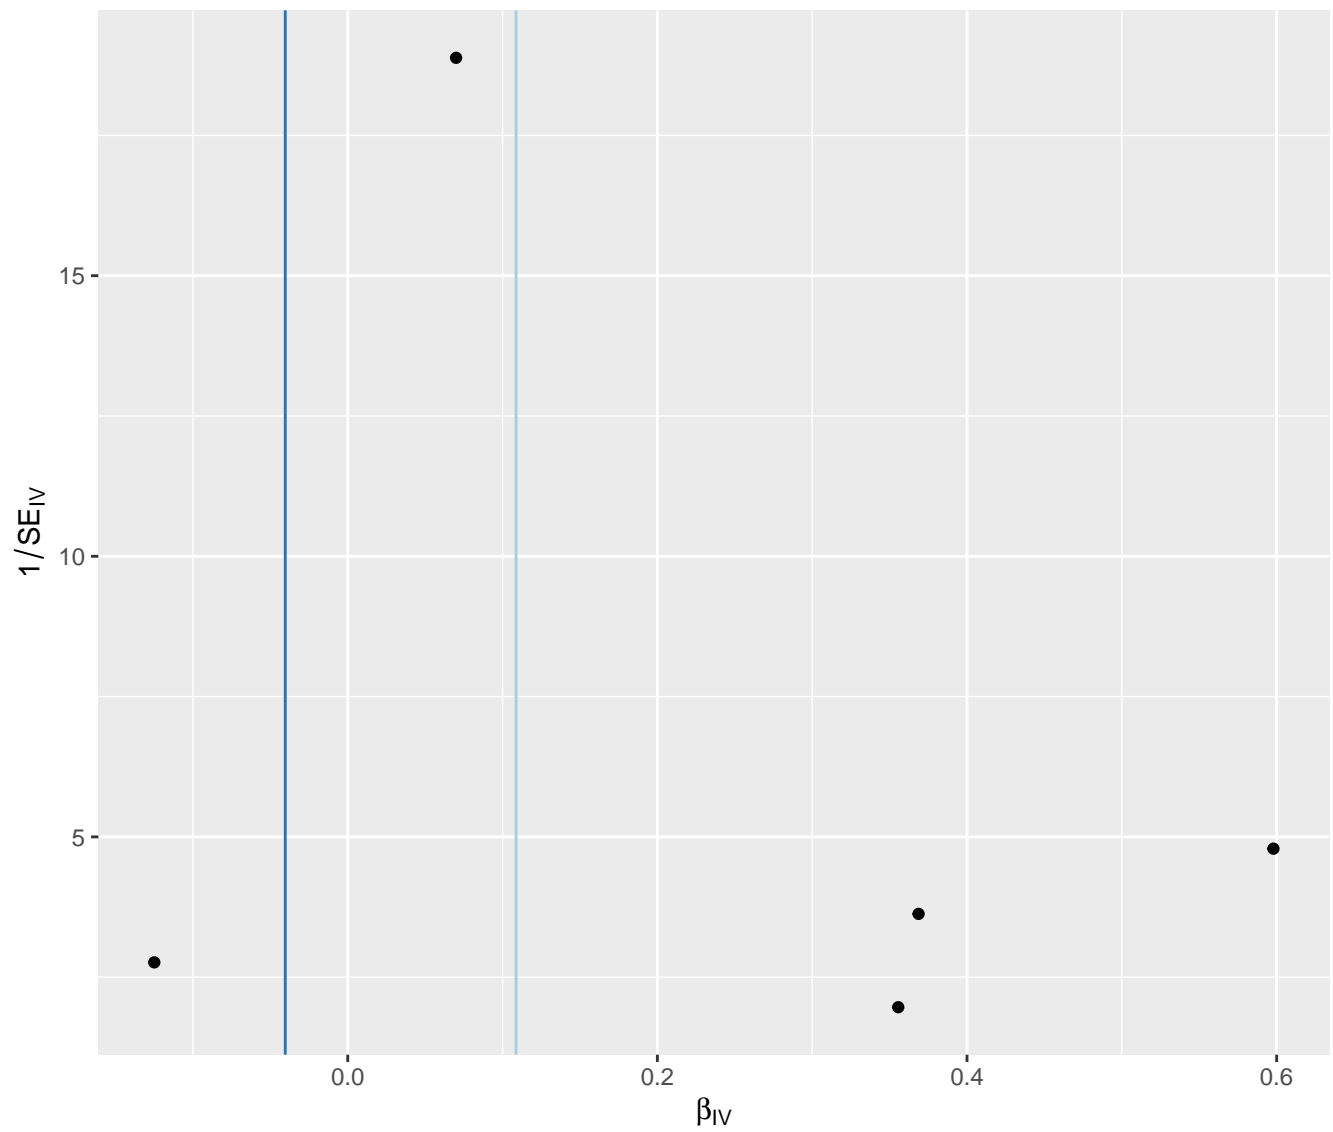

### MR Method

- Inverse variance weighted
- MR Egger

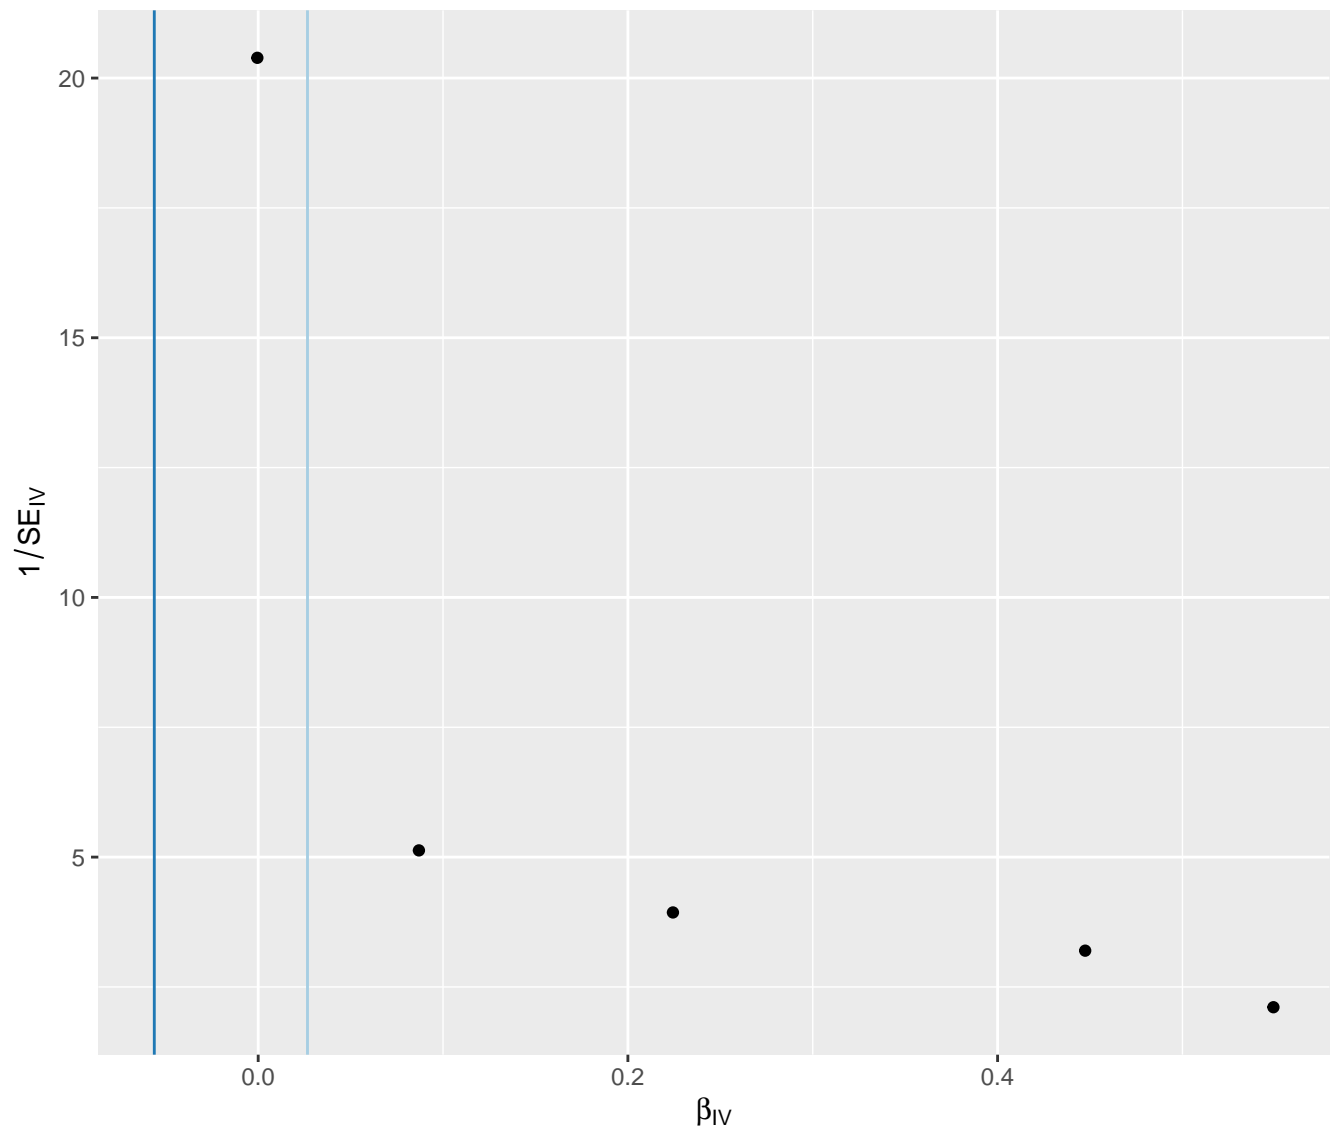

Supplement: 41598_2024_84447_MOESM2_ESM.pdf [file 41598_2024_84447_MOESM2_ESM.pdf]
